# Supplementary material for: Deep evolutionary analysis reveals the design principles of fold A glycosyltransferases
Source: eLife. 2020 Apr 1;9:e54532. doi: 10.7554/eLife.54532 (PMC7185993; doi:10.7554/eLife.54532)
Supplement: Figure 6—source data 2. — The validation datasets (highlighted in blue rows) include GTs that have some experimental characterization but were not included in the characterized dataset. The validation set was used to compare the model predictions with the experimental results. The ‘Match Experimental’ column indicates whether the prediction matched experimental results. The prediction set includes predictions for GTs of unknown functions. The ‘Confidence’ column includes the confidence for prediction which was derived based on the probability for the 1 st class and its difference with the probability for the 2nd class. Probabilities for all the six classes are provided in the ‘Classwise Probablity’ columns. [file elife-54532-fig6-data2.xlsx]

## Sheet: Sheet1
Figure 6-source data 2: Results for donor prediction using the GDBT ML model for GT-A sequences from five model organisms. The validation datasets (highlighted in blue rows) include GTs that have some experimental characterization but were not included in the characterized dataset. The validation set was used to compare the model predictions with the experimental results. The "Match Experimental"…
GenBankID	UniProtID	GT Family	Organism	Protein Name	Multidomain Region	Domain Bounds	Predicted Donor	Probability 1stClass	Probability 2ndClass	Difference (Probability1stClass-Probability2ndClass)	Confidence	Match Experimental	Classwise Probability						Protein Description
													Prob_Gal	Prob_GalNAc	Prob_Glc	Prob_GlcNAc	Prob_Man	Prob_Others
Validation Set
BAB09408.1	Q8L778	GT2-CeS	Arabidopsis thaliana	CESA5	-	353-820	Glc	0.996354	0.00168266	0.994671	HIGH	Yes	0.000265354	0.000648097	0.996354	0.00168266	0.00018918	0.000860711	Cellulose synthase A catalytic subunit 5 [UDP-forming] (AtCesA5) (EC 2.4.1.12)
AAC39335.1	O48947	GT2-CeS	Arabidopsis thaliana	CESA2	-	366-834	Glc	0.99618	0.00176862	0.994411	HIGH	Yes	0.00026681	0.000681205	0.99618	0.00176862	0.000198844	0.000904681	Cellulose synthase A catalytic subunit 2 [UDP-forming] (AtCesA2) (Ath-A) (EC 2.4.1.12)
BAB10307.1	Q94JQ6	GT2-CeS	Arabidopsis thaliana	CESA6	-	365-835	Glc	0.996354	0.00168266	0.994671	HIGH	Yes	0.000265354	0.000648097	0.996354	0.00168266	0.00018918	0.000860711	Cellulose synthase A catalytic subunit 6 [UDP-forming] (AtCesA6) (EC 2.4.1.12) (AraxCelA) (Isoxaben-resistant protein 2) (Protein PROCUSTE 1) (Protein QUILL)
AAM20487.1	Q8LPK5	GT2-CeS	Arabidopsis thaliana	CESA8	-	273-733	Glc	0.996367	0.00139365	0.994973	HIGH	Yes	0.00139365	0.0003816	0.996367	0.00121395	0.000137447	0.000506787	Cellulose synthase A catalytic subunit 8 [UDP-forming] (AtCesA8) (EC 2.4.1.12) (Protein IRREGULAR XYLEM 1) (AtIRX1) (Protein LEAF WILTING 2)
AAD32031.1	Q9SWW6	GT2-CeS	Arabidopsis thaliana	CESA7	-	327-776	Glc	0.993583	0.00321045	0.990372	HIGH	Yes	0.00321045	0.000814404	0.993583	0.00153548	0.000252718	0.000604119	Cellulose synthase A catalytic subunit 7 [UDP-forming] (AtCesA7) (EC 2.4.1.12) (Protein FRAGILE FIBER 5) (Protein IRREGULAR XYLEM 3) (AtIRX3)
AAC39336.1	Q941L0	GT2-CeS	Arabidopsis thaliana	CESA3	-	348-815	Glc	0.99765	0.00105779	0.996592	HIGH	Yes	0.000373061	0.000343793	0.99765	0.00105779	0.000113967	0.000461598	Cellulose synthase A catalytic subunit 3 [UDP-forming] (AtCesA3) (EC 2.4.1.12) (Constitutive expression of VSP1 protein 1) (Isoxaben-resistant protein 1) (Ath-B) (Protein ECTOPIC LIGNIN 1) (Protein RADIALLY SWOLLEN 5) (AtRSW5)
AAO15532.1	Q84JA6	GT2-CeS	Arabidopsis thaliana	CESA4	-	305-804	Glc	0.990536	0.00391674	0.986619	HIGH	Yes	0.00391674	0.00107671	0.990536	0.00231611	0.000325742	0.00182881	Cellulose synthase A catalytic subunit 4 [UDP-forming] (AtCesA4) (EC 2.4.1.12) (Protein IRREGULAR XYLEM 5) (AtIRX5)
AAD20396.1	Q9SJ22	GT2-CeS	Arabidopsis thaliana	CESA9	-	371-838	Glc	0.994164	0.00265163	0.991513	HIGH	Yes	0.00265163	0.000728929	0.994164	0.0014167	0.00014521	0.000893197	Probable cellulose synthase A catalytic subunit 9 [UDP-forming] (AtCesA9) (EC 2.4.1.12)
AAD20713.1	Q9SKJ5	GT2-CeS	Arabidopsis thaliana	CESAA	-	351-817	Glc	0.989191	0.0075435	0.981647	HIGH	Yes	0.000248568	0.000667238	0.989191	0.0075435	0.000591081	0.00175862	Probable cellulose synthase A catalytic subunit 10 [UDP-forming] (AtCesA10) (AtCesA13) (EC 2.4.1.12)
AAF02892.1	Q9SRW9	GT2-CeS	Arabidopsis thaliana	CSLD5	-	403-934	Glc	0.99754	0.000753796	0.996786	HIGH	Yes	0.000515194	0.000480125	0.99754	0.000753796	0.000147193	0.000564077	Cellulose synthase-like protein D5 (AtCslD5) (EC 2.4.1.-)
AAC39334.1	O48946	GT2-CeS	Arabidopsis thaliana	CESA1	-	364-830	Glc	0.989817	0.00710677	0.98271	HIGH	Yes	0.000234177	0.000628608	0.989817	0.00710677	0.00055686	0.00165681	Cellulose synthase A catalytic subunit 1 [UDP-forming] (AtCesA1) (EC 2.4.1.12) (Protein RADIALLY SWOLLEN 1) (AtRSW1)
AAF80640.1	Q9LM93	GT2-DPs	Arabidopsis thaliana	DPM1	-	16-242	Man	0.994979	0.00317351	0.991805	HIGH	Yes	0.00033329	0.000129744	0.00317351	0.000636775	0.994979	0.000747936	Dolichol-phosphate mannosyltransferase subunit 1 (EC 2.4.1.83) (Dol-P-Man synthase1) (Dolichol-phosphate mannose synthase subunit 1) (DPM synthase subunit 1)
AAU94388.1	Q5XEZ1	GT31-Euk	Arabidopsis thaliana	B3GT9	-	120-342	Gal	0.809378	0.165837	0.643541	HIGH	Yes	0.809378	0.00314688	0.00862333	0.165837	0.00383661	0.00917803	Hydroxyproline O-galactosyltransferase HPGT3 (EC 2.4.1.-) (Beta-1,3-galactosyltransferase 9)
AAK92710.1	Q94A05	GT31-Euk	Arabidopsis thaliana	B3GTA	-	119-341	Gal	0.854969	0.122001	0.732968	HIGH	Yes	0.854969	0.00282604	0.00866437	0.122001	0.00523094	0.0063094	Hydroxyproline O-galactosyltransferase HPGT2 (EC 2.4.1.-) (Beta-1,3-galactosyltransferase 10)
BAB09796.1	Q94F27	GT31-Euk	Arabidopsis thaliana	B3GTB	-	111-333	Gal	0.917673	0.0585333	0.85914	HIGH	Yes	0.917673	0.00157404	0.00361815	0.0585333	0.000652477	0.017949	Hydroxyproline O-galactosyltransferase HPGT1 (EC 2.4.1.-) (Beta-1,3-galactosyltransferase 11)
BAC42872.1	Q8GXG6	GT31-Galt-Gnt	Arabidopsis thaliana	B3GTH	-	426-659	Gal	0.994512	0.00193848	0.992573	HIGH	Yes	0.994512	0.000483015	0.00079196	0.00193848	0.000403169	0.0018716	Hydroxyproline O-galactosyltransferase GALT4 (EC 2.4.1.-) (Beta-1,3-galactosyltransferase 17)
BAA97209.1	Q9LV16	GT31-Galt-Gnt	Arabidopsis thaliana	B3GTJ	-	433-667	Gal	0.954844	0.0162638	0.93858	HIGH	Yes	0.954844	0.00260406	0.0148628	0.0162638	0.00237587	0.00904922	Hydroxyproline O-galactosyltransferase GALT6 (EC 2.4.1.-) (Beta-1,3-galactosyltransferase 19)
AAL91295.1	Q8RX55	GT31-Galt-Gnt	Arabidopsis thaliana	B3GTI	-	424-658	Gal	0.934773	0.0244774	0.910295	HIGH	Yes	0.934773	0.00168839	0.0244774	0.0242283	0.00325496	0.0115782	Hydroxyproline O-galactosyltransferase GALT5 (AtGALT5) (EC 2.4.1.-) (Beta-1,3-galactosyltransferase 18)
AAK32808.1	Q9ASW1	GT31-Galt-Gnt	Arabidopsis thaliana	B3GTG	-	372-607	Gal	0.72638	0.0854143	0.640965	HIGH	Yes	0.72638	0.0718348	0.0854143	0.0802095	0.00827066	0.0278911	Hydroxyproline O-galactosyltransferase GALT3 (EC 2.4.1.-) (Beta-1,3-galactosyltransferase 16)
CAB87837.1	Q9LY62	GT64	Arabidopsis thaliana	GT644	-	75-318	GlcNAc	0.963258	0.0232921	0.939966	HIGH	Yes	0.0232921	0.000779936	0.00730852	0.963258	0.00198926	0.00337247	Glycosyltransferase family 64 protein C4 (GT64 C4) (EC 2.4.1.-) (Protein ECTOPICALLY PARTING CELLS 1) (AtEPC1)
NP_196070.2	Q84WB7	GT64	Arabidopsis thaliana	GINT1	-	519-747	GlcNAc	0.947869	0.0325282	0.915341	HIGH	Yes	0.0325282	0.00112482	0.00948231	0.947869	0.00573706	0.00325884	Glucosamine inositolphosphorylceramide transferase 1 (EC 2.4.99.-) (Glycosyltransferase family protein 64 protein C5) (GT64 C5)
BAF00667.1	Q0WQD2	GT8-GAUT	Arabidopsis thaliana	GAUT3	-	368-666	Others	0.806548	0.113249	0.693299	HIGH	Yes	0.113249	0.0240787	0.0190352	0.02651	0.0105793	0.806548	Probable galacturonosyltransferase 3 (EC 2.4.1.-)
AAK93644.1	Q949Q1	GT8-GAUT	Arabidopsis thaliana	GAUTB	-	229-525	Others	0.888482	0.0517892	0.836692	HIGH	Yes	0.0198134	0.00728142	0.0517892	0.0227841	0.00985015	0.888482	Probable galacturonosyltransferase 11 (EC 2.4.1.-)
BAB02072.1	Q9LSG3	GT8-GAUT	Arabidopsis thaliana	GAUT8	-	248-546	Others	0.77119	0.0848309	0.686359	HIGH	Yes	0.0321365	0.0848309	0.0676413	0.0401932	0.00400795	0.77119	Galacturonosyltransferase 8 (EC 2.4.1.-) (Glycosyltransferase QUASIMODO1)
CAC01746.1	Q8GWT1	GT8-GAUT	Arabidopsis thaliana	GAUTE	-	246-559	Others	0.474655	0.454759	0.0198954	LOW	Yes	0.0150746	0.0108675	0.454759	0.0408778	0.00376641	0.474655	Probable galacturonosyltransferase 14 (EC 2.4.1.-)
BAB09935.1	Q9FH36	GT8-GAUT	Arabidopsis thaliana	GAUTC	-	208-521	Others	0.63257	0.265587	0.366983	MEDIUM	Yes	0.0278774	0.00516647	0.265587	0.0637374	0.00506168	0.63257	Probable galacturonosyltransferase 12 (EC 2.4.1.-) (Like glycosyl transferase 6) (Protein IRREGULAR XYLEM 8)
AAB63818.1	O22893	GT8-Glycogenin	Arabidopsis thaliana	GOLS1	-	30-295	Gal	0.97461	0.0191288	0.955481	HIGH	Yes	0.97461	0.000556073	0.0191288	0.00196338	0.000886659	0.002855	Galactinol synthase 1 (AtGolS1) (GolS-1) (EC 2.4.1.123)
AAC34345.1	Q8W4A7	GT8-Glycogenin	Arabidopsis thaliana	GUX3	N-term	261-500	Others	0.953472	0.0232096	0.930262	HIGH	Yes	0.00472507	0.00278479	0.0232096	0.0139398	0.00186883	0.953472	Putative UDP-glucuronate:xylan alpha-glucuronosyltransferase 3 (UDP-GlcA:xylan glucuronyltransferase 3) (EC 2.4.1.-) (Glycogenin-like protein 3) (Plant glycogenin-like starch initiation protein 2) (Protein GLUCURONIC ACID SUBSTITUTION OF XYLAN 3) (AtGUX3)
AAC34345.1	Q8W4A7	GT8-Glycogenin	Arabidopsis thaliana	GUX3	C-term	868-1107	Others	0.924125	0.040883	0.883243	HIGH	Yes	0.00736479	0.0029864	0.040883	0.0217275	0.00291287	0.924125	Putative UDP-glucuronate:xylan alpha-glucuronosyltransferase 3 (UDP-GlcA:xylan glucuronyltransferase 3) (EC 2.4.1.-) (Glycogenin-like protein 3) (Plant glycogenin-like starch initiation protein 2) (Protein GLUCURONIC ACID SUBSTITUTION OF XYLAN 3) (AtGUX3)
AAK68509.3	Q965Q8	GT14	Caenorhabditis elegans	XYLT	-	232-514	Others	0.968242	0.025408	0.942834	HIGH	Yes	0.000535033	0.000601158	0.00502188	0.025408	0.000191634	0.968242	Xylosyltransferase sqv-6 (EC 2.4.2.26) (Peptide O-xylosyltransferase) (Squashed vulva protein 6)
AAX62733.1	G5EBQ8	GT2-Chitin-HAS	Caenorhabditis elegans	CHS2	-	698-1018	GlcNAc	0.997281	0.00177866	0.995503	HIGH	Yes	0.000341507	0.000147558	0.00177866	0.997281	0.000115797	0.000335006	Chitin synthase chs-2 (EC 2.4.1.16) (Chitin-UDP acetyl-glucosaminyl transferase chs-2)
AAC13672.1	Q95ZJ1	GT27	Caenorhabditis elegans	GALT5	-	178-443	GalNAc	0.998664	0.000693046	0.997971	HIGH	Yes	0.000117723	0.998664	0.000693046	0.000314973	7.17422e-05	0.000138031	Polypeptide N-acetylgalactosaminyltransferase 5 (pp-GaNTase 5) (EC 2.4.1.41) (Protein-UDP acetylgalactosaminyltransferase 5) (UDP-GalNAc:polypeptide N-acetylgalactosaminyltransferase 5)
CAA22098.1	Q7K755	GT27	Caenorhabditis elegans	GLT11	-	162-427	GalNAc	0.998552	0.000577331	0.997975	HIGH	Yes	0.000168705	0.998552	0.000577331	0.000487663	7.31281e-05	0.000140697	Putative polypeptide N-acetylgalactosaminyltransferase 11 (pp-GaNTase 11) (EC 2.4.1.41) (Protein-UDP acetylgalactosaminyltransferase 11) (UDP-GalNAc:polypeptide N-acetylgalactosaminyltransferase 11)
CAJ76949.1	O45947	GT27	Caenorhabditis elegans	GLT10	-	160-425	GalNAc	0.995307	0.00159195	0.993715	HIGH	Yes	0.000646175	0.995307	0.00159195	0.00114556	0.000369551	0.000939508	Putative polypeptide N-acetylgalactosaminyltransferase 10 (pp-GaNTase 10) (EC 2.4.1.41) (Protein-UDP acetylgalactosaminyltransferase 10) (UDP-GalNAc:polypeptide N-acetylgalactosaminyltransferase 10)
AAK72094.1	Q95US5	GT31-Galt-Gnt	Caenorhabditis elegans	BRE5	-	78-284	Gal	0.916833	0.0453925	0.871441	HIGH	Yes	0.916833	0.00110023	0.0453925	0.0297502	0.00219226	0.00473139	Beta-1,3-galactosyltransferase bre-5 (EC 2.4.1.-) (Bacillus thuringiensis toxin-resistant protein 5) (Bt toxin-resistant protein 5)
CAA06741.1	Q09363	GT43	Caenorhabditis elegans	SQV8	-	100-327	Others	0.995716	0.00269878	0.993017	HIGH	Yes	0.000608708	8.31704e-05	0.000762929	0.00269878	0.000130601	0.995716	Galactosylgalactosylxylosylprotein 3-beta-glucuronosyltransferase sqv-8 (EC 2.4.1.135) (Glucuronyl transferase I) (GlcAT-I) (Squashed vulva protein 8) (Vulval invagination protein sqv-8)
AAC47510.1	O01705	GT64	Caenorhabditis elegans	EXT2	-	562-787	GlcNAc	0.988623	0.00671603	0.981907	HIGH	Yes	0.00671603	0.000235995	0.00189936	0.988623	0.00071694	0.00180863	Exostosin-2 homolog (EC 2.4.1.223) (EC 2.4.1.224) (EC 2.4.1.225) (Glucuronyl-galactosyl-proteoglycan 4-alpha-N- acetylglucosaminyltransferase) (GlcNAc transferase I) (GlcNAcT-I) (Glucuronyl-galactosyl-proteoglycan/Glucuronosyl-N-acetylglucosaminyl-proteoglycan 4-alpha-N-acetylglucosaminyltransferase) (GlcAT-II) (GlcNAc transferase II) (GlcNAcT-II) (Glucuronyl transferase II) (Multiple exostoses h…
CAA82350.1	P34548	GT7	Caenorhabditis elegans	SQV3	-	54-257	Gal	0.995643	0.00294443	0.992699	HIGH	Yes	0.995643	0.00294443	0.00083475	0.000399127	3.72351e-05	0.000141339	Xylosylprotein 4-beta-galactosyltransferase (XGalT-I) (EC 2.4.1.133) (Squashed vulva protein 3) (UDP-galactose:beta-N-acetylglucosamine beta-1,4-galactosyltransferase sqv-3)
AAO85274.1	Q7Z1Z1	GT7	Caenorhabditis elegans	CHSSA	C-term	532-681	GalNAc	0.951844	0.0220624	0.929782	HIGH	Yes	0.0220624	0.951844	0.00881781	0.00881386	0.00274263	0.00571894	Chondroitin sulfate synthase sqv-5 (EC 2.4.1.174) (EC 2.4.1.175) (EC 2.4.1.226) (Glucuronosyl-N-acetylgalactosaminyl-proteoglycan 4-beta-N- acetylgalactosaminyltransferase 1) (Glucuronylgalactosylproteoglycan 4-beta-N- acetylgalactosaminyltransferase) (N-acetylgalactosaminyl-proteoglycan 3-beta-glucuronosyltransferase 1) (Squashed vulva protein 5)
AAF57964.3	Q8MRC9	GT27	Drosophila melanogaster	GALT9	-	212-471	GalNAc	0.999176	0.000377451	0.998799	HIGH	Yes	0.000105501	0.999176	0.000377451	0.00022643	3.9162e-05	7.53469e-05	Putative polypeptide N-acetylgalactosaminyltransferase 9 (pp-GaNTase 9) (EC 2.4.1.41) (Protein-UDP acetylgalactosaminyltransferase 9) (UDP-GalNAc:polypeptide N-acetylgalactosaminyltransferase 9)
AAM29489.1	Q8MYY6	GT27	Drosophila melanogaster	GLT13	-	113-389	GalNAc	0.942897	0.0489414	0.893956	HIGH	Yes	0.00290575	0.942897	0.00152116	0.00288513	0.0489414	0.000849108	Putative polypeptide N-acetylgalactosaminyltransferase 13 (pp-GaNTase 13) (EC 2.4.1.41) (Protein-UDP acetylgalactosaminyltransferase 13) (UDP-GalNAc:polypeptide N-acetylgalactosaminyltransferase 13)
AAN75750.1	Q8IA43	GT27	Drosophila melanogaster	GLT10	-	170-433	GalNAc	0.998948	0.000367647	0.998581	HIGH	Yes	0.000107748	0.998948	0.000315085	0.000217018	4.42782e-05	0.000367647	Putative polypeptide N-acetylgalactosaminyltransferase 10 (pp-GaNTase 10) (EC 2.4.1.41) (Protein-UDP acetylgalactosaminyltransferase 10) (UDP-GalNAc:polypeptide N-acetylgalactosaminyltransferase 10)
AAF49589.2	Q8IA44	GT27	Drosophila melanogaster	GLT12	-	185-457	GalNAc	0.951062	0.0167217	0.93434	HIGH	Yes	0.0167217	0.951062	0.00732652	0.0160523	0.00141327	0.0074246	Putative polypeptide N-acetylgalactosaminyltransferase 12 (pp-GaNTase 12) (EC 2.4.1.41) (Protein-UDP acetylgalactosaminyltransferase 12) (UDP-GalNAc:polypeptide N-acetylgalactosaminyltransferase 12)
AAF50082.1	Q9VTG7	GT43	Drosophila melanogaster	B3G2P	-	234-452	Others	0.996778	0.0013301	0.995448	HIGH	Yes	0.000371999	0.000179133	0.0013301	0.0012018	0.00013913	0.996778	Galactosylgalactosylxylosylprotein 3-beta-glucuronosyltransferase P (EC 2.4.1.135) (Beta-1,3-glucuronyltransferase P) (Glucuronosyltransferase P) (GlcAT-P) (UDP-glucuronosyltransferase P) (DmGlcAT-BSII)
AAN09117.1	O97422	GT43	Drosophila melanogaster	B3GI	-	53-284	Others	0.988828	0.00891865	0.979909	HIGH	Yes	0.000709784	0.000107255	0.000664892	0.00891865	0.000771816	0.988828	Galactosylgalactosylxylosylprotein 3-beta-glucuronosyltransferase I (EC 2.4.1.135) (Beta-1,3-glucuronyltransferase I) (Glucuronosyltransferase I) (DmGlcAT-I) (UDP-GlcUA:Gal beta-1,3-Gal-R glucuronyltransferase) (GlcUAT-I)
AAD38573.1	Q9Y169	GT64	Drosophila melanogaster	EXT2	-	456-688	GlcNAc	0.990342	0.00388188	0.98646	HIGH	Yes	0.00325983	0.000286428	0.00388188	0.990342	0.000563909	0.00166596	Exostosin-2 (EC 2.4.1.224) (EC 2.4.1.225) (Protein sister of tout-velu)
AAC32397.1	Q9V730	GT64	Drosophila melanogaster	EXT1	-	494-729	GlcNAc	0.992659	0.00448552	0.988174	HIGH	Yes	0.00133942	7.80485e-05	0.00116845	0.992659	0.000269183	0.00448552	Exostosin-1 (EC 2.4.1.224) (EC 2.4.1.225) (Protein tout-velu)
AAC50706.1	Q92839	GT2-Chitin-HAS	Homo sapiens	HYAS1	-	98-385	GlcNAc	0.836405	0.150201	0.686204	HIGH	Yes	0.00589586	0.000498767	0.00485964	0.836405	0.00213988	0.150201	Hyaluronan synthase 1 (EC 2.4.1.212) (Hyaluronate synthase 1) (Hyaluronic acid synthase 1) (HA synthase 1) (HuHAS1)
AAC50692.1	Q92819	GT2-Chitin-HAS	Homo sapiens	HYAS2	-	86-360	GlcNAc	0.849089	0.135849	0.713241	HIGH	Yes	0.00967421	0.000541668	0.00360769	0.849089	0.00123861	0.135849	Hyaluronan synthase 2 (EC 2.4.1.212) (Hyaluronate synthase 2) (Hyaluronic acid synthase 2) (HA synthase 2)
AAF36984.1	O00219	GT2-Chitin-HAS	Homo sapiens	HYAS3	-	88-363	GlcNAc	0.961141	0.0217365	0.939404	HIGH	Yes	0.0217365	0.000701343	0.0103243	0.961141	0.00160373	0.00449321	Hyaluronan synthase 3 (EC 2.4.1.212) (Hyaluronate synthase 3) (Hyaluronic acid synthase 3) (HA synthase 3)
BAA96026.1	Q5T4B2	GT25	Homo sapiens	GT253	-	321-502	Gal	0.683951	0.126363	0.557588	HIGH	Yes	0.683951	0.0212888	0.126363	0.0426187	0.00796755	0.11781	Inactive glycosyltransferase 25 family member 3 (Cerebral endothelial cell adhesion molecule)
NP_001035257.1	Q8NES3	GT31-Fringe	Homo sapiens	LFNG	-	114-353	GlcNAc	0.989826	0.00395672	0.985869	HIGH	Yes	0.00238461	0.00143105	0.00162758	0.989826	0.000774424	0.00395672	Beta-1,3-N-acetylglucosaminyltransferase lunatic fringe (EC 2.4.1.222) (O-fucosylpeptide 3-beta-N-acetylglucosaminyltransferase)
NP_002908.1	Q9Y644	GT31-Fringe	Homo sapiens	RFNG	-	59-301	GlcNAc	0.992304	0.00300237	0.989301	HIGH	Yes	0.00300237	0.00110814	0.00137911	0.992304	0.000599679	0.00160716	Beta-1,3-N-acetylglucosaminyltransferase radical fringe (EC 2.4.1.222) (O-fucosylpeptide 3-beta-N-acetylglucosaminyltransferase)
NP_068836.2	Q8N5D6	GT6	Homo sapiens	GBGT1	-	113-346	GalNAc	0.965737	0.0211846	0.944553	HIGH	Yes	0.0211846	0.965737	0.00596533	0.00441608	0.000635078	0.00206146	Globoside alpha-1,3-N-acetylgalactosaminyltransferase 1 (EC 2.4.1.-) (Forssman glycolipid synthase-like protein)
BAC11694.1	Q8NBI6	GT8-LpsGlt	Homo sapiens	XXLT1	-	117-383	Others	0.979634	0.0131483	0.966486	HIGH	Yes	0.00112819	0.00278171	0.0131483	0.00283014	0.000477258	0.979634	Xyloside xylosyltransferase 1 (EC 2.4.2.n3) (UDP-xylose:alpha-xyloside alpha-1,3-xylosyltransferase)
CAA53680.1	P29465	GT2-Chitin-HAS	Saccharomyces cerevisiae	CHS3	-	655-1003	GlcNAc	0.982882	0.0113532	0.971529	HIGH	Yes	0.00096548	0.000597927	0.0113532	0.982882	0.000473335	0.00372793	Chitin synthase 3 (EC 2.4.1.16) (Chitin-UDP acetyl-glucosaminyl transferase 3) (Class-IV chitin synthase 3)
AAB39300.1	P47124	GT32	Saccharomyces cerevisiae	HOC1	-	133-388	Man	0.471054	0.210161	0.260893	LOW	Yes	0.0653737	0.00438006	0.0451249	0.203906	0.471054	0.210161	Putative glycosyltransferase HOC1 (EC 2.4.-.-) (M-Pol II subunit Hoc1p) (Mannan polymerase II complex HOC1 subunit)
AAA68909.1	P33300	GT32	Saccharomyces cerevisiae	SUR1	-	57-218	Man	0.990117	0.00576154	0.984356	HIGH	Yes	0.000780006	0.000699774	0.00176604	0.00576154	0.990117	0.000875404	Mannosyl phosphorylinositol ceramide synthase SUR1 (EC 2.4.-.-)
CAA89103.1	P23642	GT62	Saccharomyces cerevisiae	VAN1	-	195-515	Man	0.977678	0.0145647	0.963114	HIGH	Yes	0.00355782	0.000218248	0.0145647	0.00239687	0.977678	0.00158393	Mannan polymerase I complex VAN1 subunit (M-pol I subunit VAN1) (Vanadate resistance protein)
AAF79456.1	Q9LN68	GT8-GATL	Arabidopsis thaliana	GATL1	-	65-326	Man	0.383617	0.280044	0.103573	LOW	No	0.280044	0.00544492	0.170264	0.0671884	0.383617	0.0934415	Probable galacturonosyltransferase-like 1 (EC 2.4.1.-) (Protein GAOLAOZHUANGREN 1) (Protein PARVUS)
AAO85274.1	Q7Z1Z1	GT31-Chsy	Caenorhabditis elegans	CHSSA	N-term	83-325	Others	0.666544	0.259584	0.406959	MEDIUM	No	0.259584	0.0049237	0.0196858	0.0463514	0.00291122	0.666544	Chondroitin sulfate synthase sqv-5 (EC 2.4.1.174) (EC 2.4.1.175) (EC 2.4.1.226) (Glucuronosyl-N-acetylgalactosaminyl-proteoglycan 4-beta-N- acetylgalactosaminyltransferase 1) (Glucuronylgalactosylproteoglycan 4-beta-N- acetylgalactosaminyltransferase) (N-acetylgalactosaminyl-proteoglycan 3-beta-glucuronosyltransferase 1) (Squashed vulva protein 5)
AAA50619.1	P45895	GT31-Chsy	Caenorhabditis elegans	CHSSB	-	107-298	Glc	0.387761	0.377168	0.010593	LOW	No	0.0702376	0.00836767	0.387761	0.146332	0.0101336	0.377168	Chondroitin sulfate synthase mig-22 (EC 2.4.1.175) (Abnormal cell migration) (Chondroitin-polymerizing factor) (ChPF) (N-acetylgalactosaminyl-proteoglycan 3-beta-glucuronosyltransferase 1) (EC 2.4.1.226)
AAO13781.1	Q8IA41	GT27	Drosophila melanogaster	GLT11	-	113-375	Others	0.626548	0.362293	0.264254	LOW	No	0.000938095	0.362293	0.00582057	0.00171506	0.00268542	0.626548	Putative polypeptide N-acetylgalactosaminyltransferase 11 (pp-GaNTase 11) (EC 2.4.1.41) (Protein-UDP acetylgalactosaminyltransferase 11) (UDP-GalNAc:polypeptide N-acetylgalactosaminyltransferase 11)
AAB48372.1	P50108	GT34	Saccharomyces cerevisiae	MNN10	-	148-286	GlcNAc	0.782072	0.123255	0.658816	HIGH	No	0.123255	0.00308189	0.0480284	0.782072	0.00983688	0.0337257	Probable alpha-1,6-mannosyltransferase MNN10 (EC 2.4.1.-) (Bud emergence delay protein 1) (Mannan polymerase II complex MNN10 subunit) (M-Pol II subunit MNN10)
Prediction set
NP_194478.3	F4JIW2	GT14	Arabidopsis thaliana	-	-	81-360	Others	0.97095	0.0135745	0.957375	HIGH		0.0135745	0.000697819	0.00707742	0.00646461	0.00123572	0.97095	Core-2/I-branching beta-1,6-N-acetylglucosaminyltransferase family protein (Glycosyltransferase)
AAF34844.1	Q9LE60	GT14	Arabidopsis thaliana	-	-	82-361	Others	0.968481	0.0149414	0.953539	HIGH		0.0149414	0.000941201	0.0070282	0.00713638	0.00147219	0.968481	AT3g15350/K7L4_15 (Core-2/I-branching beta-1,6-N-acetylglucosaminyltransferase family protein) (Glycosylation enzyme-like protein) (Glycosyltransferase)
AAT71946.1	Q6DBE8	GT14	Arabidopsis thaliana	-	-	84-361	Others	0.959877	0.0217963	0.938081	HIGH		0.0217963	0.00131017	0.00789312	0.00765944	0.00146411	0.959877	At1g53100 (Core-2/I-branching beta-1,6-N-acetylglucosaminyltransferase family protein)
AAF03464.1	Q9SS69	GT14	Arabidopsis thaliana	-	-	55-333	Others	0.969305	0.0106721	0.958633	HIGH		0.00999171	0.000933136	0.0106721	0.00763976	0.00145858	0.969305	Core-2/I-branching beta-1,6-N-acetylglucosaminyltransferase family protein (Glycosyltransferase) (T12J13.3 protein)
AAF86534.1	Q9LR71	GT14	Arabidopsis thaliana	-	-	104-383	Others	0.921096	0.0323321	0.888764	HIGH		0.0323321	0.00300771	0.018336	0.0216006	0.00362784	0.921096	Core-2/I-branching beta-1,6-N-acetylglucosaminyltransferase family protein (F21B7.14) (Glycosyltransferase) (Putative glycosylation enzyme)
AAD14462.1	Q9ZQZ7	GT14	Arabidopsis thaliana	-	-	105-384	Others	0.926907	0.0278679	0.899039	HIGH		0.0278679	0.00307034	0.0187179	0.0197336	0.00370339	0.926907	Core-2/I-branching beta-1,6-N-acetylglucosaminyltransferase family protein (Glycosyltransferase) (Putative glycosylation enzyme)
AAF26009.1	-	GT14	Arabidopsis thaliana	-	-	50-329	Others	0.96638	0.0118327	0.954548	HIGH		0.0118327	0.00225154	0.0101219	0.0076476	0.00176604	0.96638	unknown protein; 33908-32196
BAB03022.1	Q9LIQ3	GT14	Arabidopsis thaliana	-	-	70-349	Others	0.830658	0.134787	0.695871	HIGH		0.00367891	0.00179277	0.0151321	0.0139505	0.134787	0.830658	Core-2/I-branching beta-1,6-N-acetylglucosaminyltransferase family protein (Glycosyltransferase)
CAB37559.1	Q9SZL9	GT2-CeS	Arabidopsis thaliana	CSLD4	-	366-859	Glc	0.995333	0.00178365	0.993549	HIGH		0.000937711	0.00102786	0.995333	0.00178365	0.000148454	0.000769407	Cellulose synthase-like protein D4 (AtCslD4) (EC 2.4.1.-)
AAC04910.1	O49323	GT2-CeS	Arabidopsis thaliana	CSLD1	-	268-791	Glc	0.986224	0.00776164	0.978463	HIGH		0.000475876	0.00151576	0.986224	0.00776164	0.000205845	0.00381647	Cellulose synthase-like protein D1 (AtCslD1) (EC 2.4.1.-)
CAC01704.1	Q9LFL0	GT2-CeS	Arabidopsis thaliana	CSLD2	-	382-898	Glc	0.994655	0.00339842	0.991257	HIGH		0.000222562	0.000658118	0.994655	0.000877032	0.000188428	0.00339842	Cellulose synthase-like protein D2 (AtCslD2) (EC 2.4.1.-)
AAG23436.1	Q9FVR3	GT2-CeS	Arabidopsis thaliana	CSLD6	-	207-733	Glc	0.995798	0.00130426	0.994493	HIGH		0.000978669	0.000911026	0.995798	0.00130426	0.000282701	0.000725847	Putative cellulose synthase-like protein D6 (AtCslD6) (EC 2.4.1.-)
AAC25944.1	O80899	GT2-CeS	Arabidopsis thaliana	CSLB2	-	97-511	Glc	0.982876	0.00578314	0.977093	HIGH		0.00537486	0.0023636	0.982876	0.00578314	0.00100095	0.00260139	Cellulose synthase-like protein B2 (AtCslB2) (EC 2.4.1.-)
AAM20086.1	Q8VYR4	GT2-CeS	Arabidopsis thaliana	CSLG2	-	99-487	Glc	0.995379	0.00172145	0.993657	HIGH		0.000306188	0.00172145	0.995379	0.00123622	0.000330016	0.00102743	Cellulose synthase-like protein G2 (AtCslG2) (EC 2.4.1.-)
AAL90907.1	Q8RX83	GT2-CeS	Arabidopsis thaliana	CSLB3	-	106-511	Glc	0.96012	0.0139216	0.946198	HIGH		0.0118906	0.0052289	0.96012	0.0139216	0.00308378	0.00575496	Cellulose synthase-like protein B3 (AtCslB3) (EC 2.4.1.-)
AAC25936.1	O80891	GT2-CeS	Arabidopsis thaliana	CSLB4	-	106-511	Glc	0.977771	0.00733785	0.970433	HIGH		0.00733785	0.00322683	0.977771	0.0064301	0.001683	0.00355146	Cellulose synthase-like protein B4 (AtCslB4) (EC 2.4.1.-)
NP_194130.3	Q0WVN5	GT2-CeS	Arabidopsis thaliana	CSLG3	-	102-516	Glc	0.991355	0.00278015	0.988575	HIGH		0.000694451	0.00278015	0.991355	0.00225784	0.000708014	0.00220423	Cellulose synthase-like protein G3 (AtCslG3) (EC 2.4.1.-)
NP_193264.3	Q0WT40	GT2-CeS	Arabidopsis thaliana	CSLB5	-	97-510	Glc	0.926713	0.0459698	0.880743	HIGH		0.0160391	0.00499061	0.926713	0.00518814	0.00109955	0.0459698	Cellulose synthase-like protein B5 (AtCslB5) (EC 2.4.1.-)
AAF79313.1	Q8VZK9	GT2-CeS	Arabidopsis thaliana	CSLE1	-	112-462	Glc	0.983323	0.0115368	0.971786	HIGH		0.0115368	0.000580983	0.983323	0.00173186	0.000588371	0.00223882	Cellulose synthase-like protein E1 (AtCslE1) (EC 2.4.1.-)
CAB78574.1	O23386	GT2-CeS	Arabidopsis thaliana	CSLB6	-	97-599	Glc	0.472512	0.178904	0.293608	LOW		0.146225	0.0986635	0.472512	0.178904	0.0216558	0.0820403	Cellulose synthase-like protein B6 (AtCslB6) (EC 2.4.1.-)
NP_180820.2	O80898	GT2-CeS	Arabidopsis thaliana	CSLB1	-	97-512	Glc	0.692771	0.146729	0.546042	HIGH		0.103782	0.0103319	0.692771	0.146729	0.00932803	0.0370576	Cellulose synthase-like protein B1 (AtCslB1) (EC 2.4.1.-)
AAN15522.1	Q9LQC9	GT2-CeS	Arabidopsis thaliana	CSLA3	-	123-356	Man	0.97375	0.0218081	0.951942	HIGH		0.000527315	0.000884486	0.0218081	0.00128777	0.97375	0.00174205	Probable glucomannan 4-beta-mannosyltransferase 3 (EC 2.4.1.32) (Cellulose synthase-like protein A3) (AtCslA3) (Glucomannan synthase) (Mannan synthase 3)
BAB11680.1	Q9FNI7	GT2-CeS	Arabidopsis thaliana	CSLA2	-	100-333	Man	0.973354	0.0221449	0.95121	HIGH		0.000497402	0.00108673	0.0221449	0.00127497	0.973354	0.00164154	Glucomannan 4-beta-mannosyltransferase 2 (EC 2.4.1.32) (Cellulose synthase-like protein A2) (AtCslA2) (Glucomannan synthase) (Mannan synthase 2)
NP_197123.3	Q9LF09	GT2-CeS	Arabidopsis thaliana	CSLAB	-	77-249	Man	0.972427	0.0238665	0.94856	HIGH		0.000429426	0.00074054	0.0238665	0.00107819	0.972427	0.00145854	Probable glucomannan 4-beta-mannosyltransferase 11 (EC 2.4.1.32) (Cellulose synthase-like protein A11) (AtCslA11) (Glucomannan synthase) (Mannan synthase 11)
NP_193077.2	Q9T0L2	GT2-CeS	Arabidopsis thaliana	CSLAF	-	114-347	Man	0.973981	0.0218536	0.952127	HIGH		0.000532882	0.000656057	0.0218536	0.00130123	0.973981	0.00167535	Probable glucomannan 4-beta-mannosyltransferase 15 (EC 2.4.1.32) (Cellulose synthase-like protein A15) (AtCslA15) (Glucomannan synthase) (Mannan synthase 15)
NP_173818.1	Q9LR87	GT2-CeS	Arabidopsis thaliana	CSLAA	-	125-358	Man	0.956057	0.041214	0.914843	HIGH		0.000399189	0.000692539	0.041214	0.000901452	0.956057	0.000735499	Probable glucomannan 4-beta-mannosyltransferase 10 (EC 2.4.1.32) (Cellulose synthase-like protein A10) (AtCslA10) (Glucomannan synthase) (Mannan synthase 10)
NP_191159.2	Q84W06	GT2-CeS	Arabidopsis thaliana	CSLAE	-	95-331	Man	0.956067	0.0379382	0.918129	HIGH		0.000593896	0.000365996	0.0379382	0.00145037	0.956067	0.00358473	Probable glucomannan 4-beta-mannosyltransferase 14 (EC 2.4.1.32) (Cellulose synthase-like protein A14) (AtCslA14) (Glucomannan synthase) (Mannan synthase 14)
AAD15482.1	Q9ZQB9	GT2-CeS	Arabidopsis thaliana	CSLCC	-	244-477	Glc	0.570704	0.418943	0.151761	LOW		0.00140689	0.00157814	0.570704	0.00396856	0.418943	0.00339965	Probable xyloglucan glycosyltransferase 12 (EC 2.4.1.-) (Cellulose synthase-like protein C12) (AtCslC12)
CAB79877.1	Q9SB75	GT2-CeS	Arabidopsis thaliana	CSLC5	-	230-463	Glc	0.889478	0.0925145	0.796964	HIGH		0.00235565	0.00264237	0.889478	0.00801835	0.0925145	0.00499068	Probable xyloglucan glycosyltransferase 5 (EC 2.4.1.-) (Cellulose synthase-like protein C5) (AtCslC5)
AAF02144.1	Q9SRT3	GT2-CeS	Arabidopsis thaliana	CSLC6	-	224-457	Glc	0.898256	0.086966	0.81129	HIGH		0.00234098	0.0024839	0.898256	0.00460203	0.086966	0.00535086	Probable xyloglucan glycosyltransferase 6 (EC 2.4.1.-) (Cellulose synthase-like protein C6) (AtCslC6)
AAD23884.1	Q9SJA2	GT2-CeS	Arabidopsis thaliana	CSLC8	-	230-463	Glc	0.891899	0.0927663	0.799133	HIGH		0.00236206	0.00264957	0.891899	0.00531878	0.0927663	0.00500426	Probable xyloglucan glycosyltransferase 8 (EC 2.4.1.-) (Cellulose synthase-like protein C8) (AtCslC8)
AAL07006.1	Q9SLN0	GT2-DPs	Arabidopsis thaliana	-	-	69-306	Glc	0.672622	0.126789	0.545833	HIGH		0.0641372	0.0104367	0.672622	0.126789	0.0509359	0.0750792	At2g39630/F12L6.29 (Glycosyltransferase) (Nucleotide-diphospho-sugar transferases superfamily protein) (Putative dolichyl-phosphate beta-glucosyltransferase)
BAD43246.1	Q6NQB7	GT31-Euk	Arabidopsis thaliana	B3GT7	-	120-341	Gal	0.937863	0.036104	0.901759	HIGH		0.937863	0.00229993	0.0109633	0.036104	0.00197848	0.0107909	Beta-1,3-galactosyltransferase 7 (EC 2.4.1.-)
AAF86563.1	Q9LM60	GT31-Euk	Arabidopsis thaliana	B3GT5	-	128-343	Gal	0.860591	0.131972	0.728619	HIGH		0.860591	0.000957464	0.00294373	0.131972	0.000662778	0.00287267	Probable beta-1,3-galactosyltransferase 5 (EC 2.4.1.-)
AAC69935.1	Q9ZV71	GT31-Euk	Arabidopsis thaliana	B3GT3	-	142-357	Gal	0.949128	0.0366455	0.912483	HIGH		0.949128	0.00133645	0.00546993	0.0366455	0.00114966	0.00627041	Probable beta-1,3-galactosyltransferase 3 (EC 2.4.1.-)
NP_001077462.1	A8MRC7	GT31-Euk	Arabidopsis thaliana	B3GT2	-	140-355	Gal	0.961016	0.0245797	0.936436	HIGH		0.961016	0.00135319	0.00553844	0.0245797	0.00116406	0.00634895	Probable beta-1,3-galactosyltransferase 2 (EC 2.4.1.-)
AAG21603.1	Q9C809	GT31-Euk	Arabidopsis thaliana	B3GT8	-	125-341	Gal	0.778427	0.206992	0.571435	MEDIUM		0.778427	0.0017459	0.00449097	0.206992	0.00142164	0.00692276	Probable beta-1,3-galactosyltransferase 8 (EC 2.4.1.-)
AAD30250.1	Q9SAA4	GT31-Euk	Arabidopsis thaliana	B3GT1	-	117-344	Gal	0.943329	0.0310315	0.912298	HIGH		0.943329	0.00285977	0.0118042	0.0310315	0.0017005	0.0092748	Probable beta-1,3-galactosyltransferase 1 (EC 2.4.1.-)
AAM62612.1	Q8LEJ9	GT31-Euk	Arabidopsis thaliana	B3GT4	-	141-358	Gal	0.977127	0.0146173	0.96251	HIGH		0.977127	0.000804731	0.00275564	0.0146173	0.000919317	0.00377566	Probable beta-1,3-galactosyltransferase 4 (EC 2.4.1.-)
AAF69535.1	Q8L7M1	GT31-Euk	Arabidopsis thaliana	B3GTE	-	89-314	GlcNAc	0.658306	0.255493	0.402812	MEDIUM		0.255493	0.0104896	0.0140978	0.658306	0.00604359	0.0555703	Probable beta-1,3-galactosyltransferase 14 (EC 2.4.1.-)
AAU05453.1	Q66GS2	GT31-Euk	Arabidopsis thaliana	B3GTC	-	113-322	GlcNAc	0.708401	0.255714	0.452687	MEDIUM		0.255714	0.00393128	0.00635505	0.708401	0.00272434	0.0228738	Probable beta-1,3-galactosyltransferase 12 (EC 2.4.1.-)
BAA97059.1	Q9LKA9	GT31-Euk	Arabidopsis thaliana	B3GTD	-	87-304	GlcNAc	0.68866	0.23814	0.45052	MEDIUM		0.23814	0.00977712	0.0120085	0.68866	0.00411365	0.0473008	Probable beta-1,3-galactosyltransferase 13 (EC 2.4.1.-)
CAB10303.1	O23378	GT31-Glt	Arabidopsis thaliana	-	-	161-285	Gal	0.612732	0.311501	0.301232	LOW		0.612732	0.0159748	0.0222624	0.311501	0.00816017	0.0293695	Uncharacterized protein AT4g15240 (Uncharacterized protein dl3665c)
AAF00656.1	Q9CAY4	GT31-Glt	Arabidopsis thaliana	-	-	179-301	GlcNAc	0.509371	0.40698	0.102391	LOW		0.40698	0.0190648	0.0177051	0.509371	0.00958576	0.0372936	At3g11420 (Beta-1,3-N-acetylglucosaminyltransferase lunatic protein, putative (DUF604)) (Glycosyltransferase)
AAC23643.1	O80941	GT31-Glt	Arabidopsis thaliana	-	-	185-322	GlcNAc	0.76377	0.110563	0.653207	HIGH		0.110563	0.0255434	0.0280527	0.76377	0.0156706	0.0564006	Glycosyltransferase (Glycosyltransferase (DUF604)) (Putative zinc finger protein)
ABE66154.1	Q1PDX3	GT31-Glt	Arabidopsis thaliana	-	-	110-242	GlcNAc	0.458503	0.379388	0.0791153	LOW		0.379388	0.00579753	0.0775249	0.458503	0.0145577	0.0642294	AT5G12460.1 (Fringe-like protein) (Fringe-like protein (DUF604))
CAA20470.1	O81745	GT31-Glt	Arabidopsis thaliana	-	-	315-427	GlcNAc	0.709334	0.154153	0.555181	HIGH		0.0359338	0.0395386	0.0388667	0.709334	0.0221739	0.154153	Uncharacterized protein AT4g23490 (Uncharacterized protein F16G20.190)
AAB71450.1	O23042	GT31-Glt	Arabidopsis thaliana	-	-	160-277	GlcNAc	0.690515	0.0987978	0.591717	HIGH		0.0789983	0.0443976	0.0987978	0.690515	0.0138098	0.0734816	YUP8H12.11 protein
AAF75069.1	Q9LQQ7	GT31-Glt	Arabidopsis thaliana	-	-	240-346	GlcNAc	0.721427	0.098267	0.62316	HIGH		0.0919066	0.0425214	0.0329566	0.721427	0.0129217	0.098267	F24B9.5 protein
AAB62835.1	O23072	GT31-Glt	Arabidopsis thaliana	-	-	178-296	GlcNAc	0.668169	0.108403	0.559766	HIGH		0.108403	0.0616426	0.0434784	0.668169	0.0218332	0.0964738	AT4g00300 protein (A_IG005I10.16 protein) (F5I10.16 protein)
AAF81315.1	Q9LMM4	GT31-Glt	Arabidopsis thaliana	-	-	176-289	GlcNAc	0.631208	0.112993	0.518214	HIGH		0.112993	0.0405796	0.101437	0.631208	0.0132231	0.100559	F22L4.11 protein (Transferring glycosyl group transferase (DUF604))
BAB08517.1	Q9FN55	GT31-Glt	Arabidopsis thaliana	-	-	200-335	GlcNAc	0.738758	0.0961017	0.642657	HIGH		0.0961017	0.0315748	0.0286836	0.738758	0.0193556	0.0855261	At5g41460 (Glycosyltransferase) (Transferring glycosyl group transferase (DUF604))
ACI88736.1	B6IDH2	GT31-Glt	Arabidopsis thaliana	-	-	124-317	GlcNAc	0.526314	0.19815	0.328164	LOW		0.19815	0.0212479	0.0467712	0.526314	0.0274495	0.180067	At4g11350 (Glycosyltransferase) (Transferring glycosyl group transferase (DUF604))
AAG51285.1	Q9C881	GT31-Glt	Arabidopsis thaliana	-	-	216-339	GlcNAc	0.433194	0.427176	0.00601819	LOW		0.427176	0.0405576	0.0275601	0.433194	0.0184006	0.053111	Beta-1,3-n-acetylglucosaminyltransferase radical fringe protein, putative (DUF604) (Glycosyltransferase)
CAB52870.1	P0C8Q4	GT32	Arabidopsis thaliana	Y4990	-	372-621	Man	0.596173	0.350414	0.245759	LOW		0.0223925	0.00302372	0.350414	0.0110066	0.596173	0.0169902	Uncharacterized protein At4g19900
NP_181350.2	F4IS00	GT32	Arabidopsis thaliana	-	-	122-380	Gal	0.365793	0.265331	0.100462	LOW		0.365793	0.0531616	0.0766726	0.265331	0.0621401	0.176902	Alpha 1,4-glycosyltransferase family protein (Glycosyltransferase)
NP_001154561.1	F4IS01	GT32	Arabidopsis thaliana	-	-	100-358	GlcNAc	0.923254	0.0423351	0.880919	HIGH		0.0423351	0.00586436	0.0168815	0.923254	0.00329595	0.00836905	Alpha 1,4-glycosyltransferase family protein
AAF07826.1	Q9S790	GT32	Arabidopsis thaliana	-	-	130-387	GlcNAc	0.854491	0.075598	0.778893	HIGH		0.075598	0.0108992	0.0241892	0.854491	0.00787301	0.0269498	Alpha 1,4-glycosyltransferase family protein (Glycosyltransferase) (MZB10.5 protein) (T16O11.2 protein)
AAG51645.1	Q9C949	GT32	Arabidopsis thaliana	-	-	152-410	GlcNAc	0.939015	0.0376862	0.901328	HIGH		0.0376862	0.00292112	0.0114824	0.939015	0.0019469	0.00694887	Alpha 1,4-glycosyltransferase family protein (Glycosyltransferase)
CAB69853.1	Q9LFB1	GT32	Arabidopsis thaliana	-	-	126-383	GlcNAc	0.851418	0.0753262	0.776092	HIGH		0.0753262	0.01086	0.0264573	0.851418	0.00908531	0.0268529	Alpha 1,4-glycosyltransferase family protein (At5g01250)
CAB80434.1	Q9SZG1	GT34	Arabidopsis thaliana	GT6	-	109-402	Gal	0.802179	0.07548	0.726699	HIGH		0.802179	0.0126044	0.0586923	0.0402746	0.0107701	0.07548	Glycosyltransferase 6 (AtGT6) (EC 2.4.-.-)
CAB80496.1	Q9SVF4	GT34	Arabidopsis thaliana	-	-	50-117	Glc	0.470403	0.351803	0.1186	LOW		0.0721591	0.0139594	0.470403	0.351803	0.0191333	0.0725416	At4g38310 (Galactosyl transferase GMA12/MNN10 family protein) (Glycosyltransferase)
AAC32437.1	O81007	GT34	Arabidopsis thaliana	GT7	-	126-419	Gal	0.714631	0.139532	0.575099	HIGH		0.714631	0.00813761	0.0801399	0.0481506	0.00940802	0.139532	Putative glycosyltransferase 7 (AtGT7) (EC 2.4.-.-)
AAG52433.1	Q9C975	GT64	Arabidopsis thaliana	GT643	-	49-300	GlcNAc	0.954075	0.0212149	0.93286	HIGH		0.00875701	0.00150401	0.0212149	0.954075	0.00614656	0.00830269	Glycosyltransferase family protein 64 C3 (GT64 C3) (EC 2.4.1.-)
BAB08785.1	Q9FKM1	GT67	Arabidopsis thaliana	-	-	143-303	Gal	0.840707	0.0779208	0.762786	HIGH		0.840707	0.015409	0.0318971	0.0779208	0.00168469	0.0323815	Hexosyltransferase (EC 2.4.1.-)
AAM14318.1	Q9FXJ4	GT77	Arabidopsis thaliana	-	-	68-306	Others	0.715061	0.183637	0.531425	MEDIUM		0.183637	0.00537217	0.0757376	0.0182056	0.00198675	0.715061	F1K23.9 (Glycosyltransferase) (Nucleotide-diphospho-sugar transferase family protein)
AAG22833.1	Q9SHQ2	GT77	Arabidopsis thaliana	-	-	69-304	Others	0.669359	0.194284	0.475076	MEDIUM		0.194284	0.00552691	0.112203	0.017042	0.00158573	0.669359	Expressed protein (F1K23.10) (Glycosyltransferase) (Nucleotide-diphospho-sugar transferase family protein)
NP_973933.1	W8Q3Q6	GT77	Arabidopsis thaliana	-	-	59-295	Others	0.902721	0.0673986	0.835323	HIGH		0.0673986	0.00173241	0.0222227	0.00534182	0.000582945	0.902721	Glycosyltransferase (Fragment)
NP_001118253.1	F4IQ97	GT77	Arabidopsis thaliana	-	-	121-357	Others	0.8417	0.0628624	0.778838	HIGH		0.0628624	0.0145941	0.0375276	0.0364092	0.00690659	0.8417	Nucleotide-diphospho-sugar transferase family protein
CAB78997.1	O49424	GT77	Arabidopsis thaliana	-	N-term	115-351	Others	0.582539	0.249474	0.333065	MEDIUM		0.0843114	0.0147083	0.249474	0.0622631	0.00670353	0.582539	Glycosyltransferase (EC 2.4.2.-)
NP_567479.5	P0C042	GT77	Arabidopsis thaliana	Y4597	-	55-274	Others	0.731626	0.110325	0.621301	HIGH		0.0864306	0.0106291	0.110325	0.0525047	0.00848411	0.731626	Uncharacterized protein At4g15970
CAB78997.1	O49424	GT77	Arabidopsis thaliana	-	C-term	455-690	Others	0.919196	0.0665083	0.852688	HIGH		0.00333059	0.00104141	0.0665083	0.00873171	0.00119198	0.919196	Glycosyltransferase (EC 2.4.2.-)
NP_198906.2	F4KIT4	GT77	Arabidopsis thaliana	-	-	70-304	Glc	0.518313	0.361988	0.156326	LOW		0.060193	0.0102184	0.518313	0.0425598	0.00672742	0.361988	Glycosyltransferase (Nucleotide-diphospho-sugar transferase family protein)
AAM61239.1	Q8LFS2	GT77	Arabidopsis thaliana	-	-	105-340	Others	0.446107	0.421981	0.0241262	LOW		0.0666162	0.0237934	0.421981	0.0352851	0.00621683	0.446107	Regulatory protein
AAF63177.1	Q9MA24	GT77	Arabidopsis thaliana	-	-	98-333	Others	0.80132	0.069305	0.732015	HIGH		0.069305	0.00751574	0.0666496	0.041918	0.0132916	0.80132	Glycosyltransferase (Nucleotide-diphospho-sugar transferase family protein) (T5E21.9)
CAB62445.1	Q9S7G2	GT8-GATL	Arabidopsis thaliana	GATL2	-	53-315	Gal	0.348112	0.343007	0.00510501	LOW		0.348112	0.0066542	0.14782	0.0822678	0.343007	0.0721382	Probable galacturonosyltransferase-like 2 (EC 2.4.1.-)
AAF30319.1	Q9M8J2	GT8-GATL	Arabidopsis thaliana	GATL4	-	66-325	Gal	0.459069	0.212067	0.247001	LOW		0.459069	0.00781522	0.212067	0.177163	0.0560877	0.0877975	Probable galacturonosyltransferase-like 4 (EC 2.4.1.-) (Galactinol synthase 9) (AtGolS9) (GolS-9)
BAB02626.1	Q9LHD2	GT8-GATL	Arabidopsis thaliana	GATLA	-	71-332	Gal	0.468626	0.294083	0.174543	LOW		0.468626	0.0113064	0.294083	0.106789	0.0524592	0.0667362	Probable galacturonosyltransferase-like 10 (EC 2.4.1.-) (Galactinol synthase 8) (AtGolS8) (GolS-8)
AAG09558.1	Q0V7R1	GT8-GATL	Arabidopsis thaliana	GATL3	-	60-305	GlcNAc	0.308839	0.305332	0.00350696	LOW		0.305332	0.0028814	0.0890941	0.308839	0.256244	0.0376091	Probable galacturonosyltransferase-like 3 (EC 2.4.1.-)
AAB61117.1	O04536	GT8-GATL	Arabidopsis thaliana	GATL9	-	82-345	Gal	0.473601	0.185242	0.288359	LOW		0.473601	0.00701856	0.185242	0.183373	0.0424737	0.108292	Probable galacturonosyltransferase-like 9 (EC 2.4.1.-) (Like glycosyl transferase 8)
AAL59936.1	Q8VYF4	GT8-GATL	Arabidopsis thaliana	GATL7	-	83-339	Glc	0.340427	0.28306	0.0573671	LOW		0.28306	0.00481938	0.340427	0.1393	0.197944	0.0344499	Probable galacturonosyltransferase-like 7 (EC 2.4.1.-)
AAC00579.1	O48684	GT8-GATL	Arabidopsis thaliana	GATL8	-	85-348	Gal	0.459769	0.187987	0.271782	LOW		0.459769	0.00712257	0.187987	0.18609	0.0491341	0.109896	Probable galacturonosyltransferase-like 8 (EC 2.4.1.-) (Like glycosyl transferase 9)
AAC78704.1	O04253	GT8-GATL	Arabidopsis thaliana	GATL6	-	66-325	Glc	0.331297	0.261967	0.0693306	LOW		0.228284	0.00432852	0.331297	0.0990165	0.261967	0.0751071	Probable galacturonosyltransferase-like 6 (EC 2.4.1.-) (Like glycosyl transferase 10)
AAG10630.1	Q9FWY9	GT8-GATL	Arabidopsis thaliana	GATL5	-	81-340	Gal	0.846964	0.0612976	0.785666	HIGH		0.846964	0.000800875	0.0612976	0.0183203	0.0484698	0.0241479	Probable galacturonosyltransferase-like 5 (EC 2.4.1.-)
AAK93659.1	Q9ZVI7	GT8-GAUT	Arabidopsis thaliana	GAUT7	-	325-606	Glc	0.697584	0.110047	0.587537	HIGH		0.00780383	0.0687388	0.697584	0.0469146	0.0689116	0.110047	Probable galacturonosyltransferase 7 (EC 2.4.1.-) (Like glycosyl transferase 7)
AID66003.1	A0A068FL09	GT8-GAUT	Arabidopsis thaliana	-	-	241-540	Others	0.952096	0.0232959	0.9288	HIGH		0.00835608	0.0232959	0.00752218	0.00729877	0.00143121	0.952096	Hexosyltransferase (EC 2.4.1.-) (Fragment)
ABO09884.1	Q0WV13	GT8-GAUT	Arabidopsis thaliana	GAUTD	-	207-520	Others	0.740189	0.15225	0.587939	HIGH		0.0336676	0.0169471	0.15225	0.0523324	0.00461358	0.740189	Probable galacturonosyltransferase 13 (EC 2.4.1.-)
AAM14333.1	Q93ZX7	GT8-GAUT	Arabidopsis thaliana	GAUT4	-	308-603	Others	0.907199	0.0331544	0.874045	HIGH		0.0199975	0.00441502	0.0331544	0.0322849	0.00294886	0.907199	Probable galacturonosyltransferase 4 (EC 2.4.1.-) (Like glycosyl transferase 3)
AAG12603.1	Q9FWA4	GT8-GAUT	Arabidopsis thaliana	GAUT9	-	249-548	Others	0.693452	0.12794	0.565512	HIGH		0.0655537	0.0294496	0.12794	0.0760237	0.00758086	0.693452	Probable galacturonosyltransferase 9 (EC 2.4.1.-)
AAK59524.1	Q9SKT6	GT8-GAUT	Arabidopsis thaliana	GAUTA	-	228-524	Others	0.879282	0.0408955	0.838387	HIGH		0.0248104	0.00332524	0.0408955	0.0393522	0.0123344	0.879282	Probable galacturonosyltransferase 10 (EC 2.4.1.-) (Like glycosyl transferase 4)
AAL91202.1	Q8RXE1	GT8-GAUT	Arabidopsis thaliana	GAUT5	-	320-596	GlcNAc	0.357761	0.322936	0.0348252	LOW		0.0721869	0.0258887	0.197917	0.357761	0.0233099	0.322936	Probable galacturonosyltransferase 5 (EC 2.4.1.-) (Like glycosyl transferase 5)
AAF63140.1	Q9M9Y5	GT8-GAUT	Arabidopsis thaliana	GAUT6	-	300-575	Glc	0.377953	0.289257	0.0886954	LOW		0.119708	0.0264289	0.377953	0.161966	0.0246867	0.289257	Probable galacturonosyltransferase 6 (EC 2.4.1.-)
AAM20549.1	Q8L4B0	GT8-GAUT	Arabidopsis thaliana	GAUTF	-	215-527	Others	0.413707	0.259994	0.153713	LOW		0.0442166	0.0462355	0.259994	0.219451	0.0163966	0.413707	Probable galacturonosyltransferase 15 (EC 2.4.1.-)
AAG09103.1	Q9FXB2	GT8-Glycogenin	Arabidopsis thaliana	GOLS2	-	22-287	Gal	0.974571	0.018654	0.955917	HIGH		0.974571	0.000857487	0.018654	0.00204256	0.00068459	0.00319013	Galactinol synthase 2 (AtGolS2) (GolS-2) (EC 2.4.1.123)
AAB71970.1	O22693	GT8-Glycogenin	Arabidopsis thaliana	GOLS4	-	23-288	Gal	0.977473	0.011622	0.965851	HIGH		0.977473	0.00127475	0.011622	0.00347139	0.00116348	0.00499517	Galactinol synthase 4 (AtGolS4) (GolS-4) (EC 2.4.1.123)
BAB10052.1	Q9FFA1	GT8-Glycogenin	Arabidopsis thaliana	GOLS5	-	22-287	Gal	0.726347	0.2051	0.521246	MEDIUM		0.726347	0.00717286	0.2051	0.0219743	0.00696223	0.0324434	Galactinol synthase 5 (AtGolS5) (GolS-5) (EC 2.4.1.123)
AAC33195.1	O80518	GT8-Glycogenin	Arabidopsis thaliana	GOLS3	-	16-281	Gal	0.981726	0.0147809	0.966945	HIGH		0.981726	0.000466615	0.0147809	0.00112515	0.000377108	0.00152463	Galactinol synthase 3 (AtGolS3) (GolS-3) (EC 2.4.1.123)
CAB38954.1	Q8H1S1	GT8-Glycogenin	Arabidopsis thaliana	GOLS6	-	25-315	Gal	0.55287	0.390772	0.162097	LOW		0.55287	0.00616594	0.390772	0.0167261	0.00529941	0.0281663	Galactinol synthase 6 (AtGolS6) (GolS-6) (EC 2.4.1.123)
NP_568516.1	F4KED2	GT8-Glycogenin	Arabidopsis thaliana	GOLSA	-	25-278	Glc	0.430416	0.310439	0.119978	LOW		0.310439	0.0230988	0.430416	0.0882057	0.0295633	0.118277	Galactinol synthase 10 (AtGolS10) (GolS-10) (EC 2.4.1.123)
AAC24075.1	Q4PSY4	GT8-Glycogenin	Arabidopsis thaliana	GOLS7	-	12-298	Gal	0.805029	0.0948696	0.71016	HIGH		0.805029	0.00334324	0.0948696	0.0218592	0.0073264	0.0675721	Galactinol synthase 7 (AtGolS7) (GolS-7) (EC 2.4.1.123)
CAH56861.1	-	GT8-Glycogenin	Arabidopsis thaliana	-	-	59-298	Glc	0.745645	0.0888676	0.656777	HIGH		0.0695683	0.0105118	0.745645	0.0888676	0.00715934	0.0782483	unnamed protein product
AAL36305.1	Q8VZP6	GT8-Glycogenin	Arabidopsis thaliana	GUX8	-	63-301	Gal	0.432635	0.396217	0.036418	LOW		0.432635	0.00947408	0.396217	0.0800948	0.00645258	0.0751263	Putative glucuronosyltransferase PGSIP8 (EC 2.4.1.-) (Glycogenin-like protein 8) (Plant glycogenin-like starch initiation protein 8)
AAG00875.1	Q9FZ37	GT8-Glycogenin	Arabidopsis thaliana	GUX4	-	271-500	Others	0.863833	0.0618165	0.802017	HIGH		0.0224617	0.00595512	0.0618165	0.0401249	0.00580851	0.863833	Putative UDP-glucuronate:xylan alpha-glucuronosyltransferase 4 (UDP-GlcA:xylan glucuronyltransferase 4) (EC 2.4.1.-) (Glycogenin-like protein 4) (Plant glycogenin-like starch initiation protein 4) (Protein GLUCURONIC ACID SUBSTITUTION OF XYLAN 4) (AtGUX4)
CAD89085.1	-	GT8-Glycogenin	Arabidopsis thaliana	-	-	278-493	Others	0.891173	0.0536058	0.837567	HIGH		0.00730129	0.0055865	0.0536058	0.0368848	0.00544896	0.891173	unnamed protein product
NP_500183.2	Q688B0	GT13	Caenorhabditis elegans	-	-	510-663	GlcNAc	0.635628	0.249021	0.386606	MEDIUM		0.0558687	0.0085453	0.249021	0.635628	0.00501371	0.0459234	Uncharacterized protein
AAB66233.1	O16776	GT14	Caenorhabditis elegans	-	-	139-338	Glc	0.784454	0.0963225	0.688131	HIGH		0.0327364	0.0963225	0.784454	0.0698921	0.00101973	0.0155754	Uncharacterized protein
AAK31555.2	Q22481	GT14	Caenorhabditis elegans	-	-	113-314	GlcNAc	0.750716	0.222172	0.528544	MEDIUM		0.0145763	0.00162463	0.222172	0.750716	0.00162876	0.00928182	Uncharacterized protein
CAB03022.1	Q93643	GT14	Caenorhabditis elegans	-	-	172-363	Glc	0.631324	0.318097	0.313226	LOW		0.0229084	0.000838923	0.631324	0.318097	0.0220445	0.00478712	Uncharacterized protein
CAB04185.3	Q9U3H9	GT14	Caenorhabditis elegans	-	-	144-341	Glc	0.576029	0.284055	0.291974	LOW		0.086831	0.012959	0.576029	0.284055	0.00365645	0.0364697	Uncharacterized protein
AAC26306.2	O76634	GT14	Caenorhabditis elegans	-	-	166-366	Glc	0.73062	0.1275	0.60312	HIGH		0.0225784	0.0991925	0.73062	0.1275	0.00302565	0.0170836	Uncharacterized protein
CAB04881.3	O45866	GT14	Caenorhabditis elegans	-	-	133-321	Glc	0.873554	0.0740464	0.799507	HIGH		0.024366	0.00191368	0.873554	0.0740464	0.00245467	0.0236656	Uncharacterized protein
CAA95817.2	Q19730	GT14	Caenorhabditis elegans	-	-	120-384	Others	0.779531	0.0861902	0.69334	HIGH		0.0737881	0.00381797	0.0861902	0.053157	0.0035162	0.779531	GLYcosylation related
AAK94766.1	G5EBK7	GT14	Caenorhabditis elegans	-	-	117-380	Others	0.804281	0.0950666	0.709215	HIGH		0.0410379	0.00639816	0.0950666	0.0516599	0.00155617	0.804281	GLY-19 (GLYcosylation related)
CAB05168.1	G5EBQ5	GT14	Caenorhabditis elegans	-	-	178-380	Glc	0.555309	0.405055	0.150254	LOW		0.0129368	0.00817712	0.555309	0.405055	0.00986783	0.00865465	Uncharacterized protein
CAB63368.1	G5EF41	GT14	Caenorhabditis elegans	-	-	178-380	Glc	0.555309	0.405055	0.150254	LOW		0.0129368	0.00817712	0.555309	0.405055	0.00986783	0.00865465	Uncharacterized protein
CAB03536.2	O02309	GT14	Caenorhabditis elegans	-	-	150-268	Glc	0.953638	0.0329576	0.92068	HIGH		0.00381699	0.000747953	0.953638	0.0329576	0.00116333	0.00767623	Uncharacterized protein
CAA18374.1	Q9XXL2	GT14	Caenorhabditis elegans	-	-	143-316	Glc	0.887821	0.0565401	0.831281	HIGH		0.0183027	0.0107447	0.887821	0.0565401	0.00220397	0.0243873	Uncharacterized protein
CAB05621.2	O02315	GT14	Caenorhabditis elegans	-	-	110-360	Others	0.681092	0.130425	0.550667	HIGH		0.0679896	0.0468296	0.130425	0.0710932	0.00257132	0.681092	GLYcosylation related
CAB00115.2	Q21796	GT14	Caenorhabditis elegans	-	-	156-346	GlcNAc	0.638441	0.191912	0.446529	MEDIUM		0.191912	0.00691106	0.126753	0.638441	0.0230675	0.0129145	Uncharacterized protein
CAB03539.2	O02312	GT14	Caenorhabditis elegans	-	-	160-366	Glc	0.643552	0.278698	0.364854	MEDIUM		0.0569766	0.0103024	0.643552	0.278698	0.00356582	0.006905	Uncharacterized protein
AAK94760.1	G5EDP7	GT14	Caenorhabditis elegans	-	-	100-301	Others	0.860097	0.0540533	0.806043	HIGH		0.0238972	0.0196726	0.0540533	0.0409508	0.00132949	0.860097	GLY-16 (GLYcosylation related)
AAK94757.1	G5ECK8	GT14	Caenorhabditis elegans	-	-	130-314	Others	0.492355	0.323871	0.168483	LOW		0.00615736	0.0256346	0.149936	0.323871	0.00204611	0.492355	GLY-1 (GLYcosylation related)
CAA21769.2	G5EEZ8	GT14	Caenorhabditis elegans	-	-	106-287	Others	0.715301	0.19932	0.515981	MEDIUM		0.0120774	0.00146721	0.19932	0.0696617	0.00217298	0.715301	GLYcosylation related
CAA95792.2	Q19421	GT2-B3GntL	Caenorhabditis elegans	-	-	9-235	GlcNAc	0.965921	0.0185615	0.94736	HIGH		0.00470738	0.000856089	0.00781161	0.965921	0.00214206	0.0185615	Glyco_trans_2-like domain-containing protein
AAD14758.1	Q8WSL9	GT2-DPs	Caenorhabditis elegans	-	-	84-307	Glc	0.956466	0.0166227	0.939844	HIGH		0.00648317	0.0017345	0.956466	0.0166227	0.00720581	0.0114874	Asparagine Linked Glycosylation (ALG) homolog, Nematode
AAD12857.2	Q9TYJ7	GT2-DPs	Caenorhabditis elegans	-	-	13-234	Man	0.966599	0.0209128	0.945686	HIGH		0.00689781	0.000381981	0.0209128	0.00277573	0.966599	0.00243239	Dolichol-phosphate mannosyltransferase subunit 1 (EC 2.4.1.83)
CAB03296.2	O18037	GT21	Caenorhabditis elegans	CGT1	-	110-338	Glc	0.948808	0.0246068	0.924201	HIGH		0.00624185	0.00854678	0.948808	0.0246068	0.00183526	0.00996143	Ceramide glucosyltransferase 1 (EC 2.4.1.80)
CAA84699.2	Q18989	GT25	Caenorhabditis elegans	-	-	292-499	GlcNAc	0.611835	0.334268	0.277567	LOW		0.334268	0.00337558	0.0181883	0.611835	0.00256544	0.0297675	Uncharacterized protein
CAB04107.2	O62163	GT31-Galt-Gnt	Caenorhabditis elegans	-	-	89-299	Gal	0.773403	0.0932101	0.680193	HIGH		0.773403	0.00955111	0.07408	0.0932101	0.00348154	0.0462745	Hexosyltransferase (EC 2.4.1.-)
CAB04032.1	O17750	GT31-Galt-Gnt	Caenorhabditis elegans	-	-	116-321	Gal	0.70325	0.152966	0.550284	HIGH		0.70325	0.0142474	0.152966	0.0502684	0.00431294	0.074955	Hexosyltransferase (EC 2.4.1.-)
CAA15841.1	G5ECA6	GT31-Galt-Gnt	Caenorhabditis elegans	-	-	89-294	Gal	0.826984	0.0935794	0.733404	HIGH		0.826984	0.00712105	0.0207025	0.0935794	0.00479577	0.0468175	Hexosyltransferase (EC 2.4.1.-)
CAB05616.2	Q9XU74	GT31-Galt-Gnt	Caenorhabditis elegans	-	-	127-336	Gal	0.852643	0.0819655	0.770678	HIGH		0.852643	0.00353788	0.0348242	0.0819655	0.00372841	0.023301	Hexosyltransferase (EC 2.4.1.-)
CAB04109.3	O62165	GT31-Galt-Gnt	Caenorhabditis elegans	-	-	82-276	Gal	0.846504	0.0821226	0.764381	HIGH		0.846504	0.00584904	0.0821226	0.0441726	0.0020834	0.0192687	Hexosyltransferase (EC 2.4.1.-)
CAD44086.2	Q8MQG4	GT31-Galt-Gnt	Caenorhabditis elegans	-	-	86-277	Gal	0.825718	0.115772	0.709947	HIGH		0.825718	0.0290284	0.0201878	0.115772	0.00448452	0.00480942	Hexosyltransferase (EC 2.4.1.-)
CAE18060.2	G5EDB3	GT31-Galt-Gnt	Caenorhabditis elegans	-	-	111-332	Glc	0.646477	0.205249	0.441227	MEDIUM		0.205249	0.00433281	0.646477	0.0345992	0.0103038	0.0990383	Hexosyltransferase (EC 2.4.1.-)
CAA15839.1	O62115	GT31-Galt-Gnt	Caenorhabditis elegans	-	-	92-297	Gal	0.769926	0.183043	0.586883	HIGH		0.769926	0.00918722	0.183043	0.0274343	0.0021489	0.00826097	Hexosyltransferase (EC 2.4.1.-)
CAA15838.2	O62114	GT31-Galt-Gnt	Caenorhabditis elegans	-	-	102-307	Gal	0.913972	0.0473301	0.866642	HIGH		0.913972	0.00489736	0.0190847	0.0473301	0.00321737	0.0114983	Hexosyltransferase (EC 2.4.1.-)
CAB05465.3	O02231	GT31-Galt-Gnt	Caenorhabditis elegans	-	-	77-282	Gal	0.546639	0.323446	0.223193	LOW		0.546639	0.0151955	0.323446	0.0885825	0.00417869	0.0219589	Hexosyltransferase (EC 2.4.1.-)
CAB03537.1	O02310	GT31-Galt-Gnt	Caenorhabditis elegans	-	-	80-198	Glc	0.416619	0.338224	0.0783953	LOW		0.338224	0.00662663	0.416619	0.212543	0.00455924	0.0214277	Hexosyltransferase (EC 2.4.1.-)
AAS21306.1	Q6QMT2	GT31-Galt-Gnt	Caenorhabditis elegans	BRE2	-	87-284	Gal	0.649028	0.148353	0.500675	HIGH		0.649028	0.0255973	0.148353	0.0904778	0.0064029	0.0801418	Beta-1,3-galactosyltransferase bre-2 (EC 2.4.1.-) (Bacillus thuringiensis toxin-resistant protein 2) (Bt toxin-resistant protein 2)
CAA93493.2	Q20575	GT31-Galt-Gnt	Caenorhabditis elegans	-	-	91-272	Gal	0.62713	0.144832	0.482297	HIGH		0.62713	0.0112244	0.144832	0.123759	0.0433078	0.0497468	Hexosyltransferase (EC 2.4.1.-)
CAB05807.1	O62375	GT31-Galt-Gnt	Caenorhabditis elegans	-	-	80-282	Glc	0.584771	0.199944	0.384828	MEDIUM		0.199944	0.0181765	0.584771	0.122329	0.00810502	0.066675	Hexosyltransferase (EC 2.4.1.-)
ADD13549.1	D3KZG1	GT31-Galt-Gnt	Caenorhabditis elegans	-	-	67-280	Man	0.547809	0.284361	0.263448	LOW		0.0947851	0.00200608	0.0438494	0.284361	0.547809	0.0271895	Hexosyltransferase (EC 2.4.1.-)
CAL69739.1	A0T4F5	GT31-Glt	Caenorhabditis elegans	-	-	79-261	Gal	0.907209	0.0786209	0.828588	HIGH		0.907209	0.00113451	0.0064841	0.0786209	0.00101842	0.00553352	Glycoprotein-N-acetylgalactosamine 3-beta-galactosyltransferase 1
CCD70241.1	O44563	GT31-Glt	Caenorhabditis elegans	-	-	97-306	Gal	0.967074	0.0240792	0.942995	HIGH		0.967074	0.000275797	0.0030612	0.0240792	0.000666912	0.00484271	Glycoprotein-N-acetylgalactosamine 3-beta-galactosyltransferase 1
AAB66027.1	O16535	GT31-Glt	Caenorhabditis elegans	-	-	101-303	Gal	0.866839	0.118911	0.747927	HIGH		0.866839	0.000743077	0.00885746	0.118911	0.00110512	0.00354435	Glycoprotein-N-acetylgalactosamine 3-beta-galactosyltransferase 1
AAB18285.2	Q22900	GT31-Glt	Caenorhabditis elegans	-	-	97-291	Gal	0.648303	0.199551	0.448752	MEDIUM		0.648303	0.00710651	0.199551	0.0668714	0.0088049	0.0693634	Glycoprotein-N-acetylgalactosamine 3-beta-galactosyltransferase 1
CCD68253.1	G5ECT3	GT31-Glt	Caenorhabditis elegans	-	-	21-213	Gal	0.589319	0.193015	0.396304	MEDIUM		0.589319	0.0080508	0.135376	0.193015	0.0103287	0.0639106	Glycoprotein-N-acetylgalactosamine 3-beta-galactosyltransferase 1
AAB70308.1	O17053	GT31-Glt	Caenorhabditis elegans	-	-	86-278	Gal	0.702789	0.228003	0.474786	MEDIUM		0.702789	0.00222972	0.0285333	0.228003	0.0039076	0.0345372	Glycoprotein-N-acetylgalactosamine 3-beta-galactosyltransferase 1
CAB04029.2	O17747	GT31-Glt	Caenorhabditis elegans	-	-	79-264	Gal	0.603414	0.358981	0.244433	LOW		0.603414	0.00181582	0.0222426	0.358981	0.00247235	0.0110751	Glycoprotein-N-acetylgalactosamine 3-beta-galactosyltransferase 1
CAB04490.2	O45579	GT31-Glt	Caenorhabditis elegans	-	-	79-283	Gal	0.759554	0.200617	0.558937	MEDIUM		0.759554	0.00109608	0.019604	0.200617	0.00215139	0.0169776	Glycoprotein-N-acetylgalactosamine 3-beta-galactosyltransferase 1
CCD71249.1	O01878	GT31-Glt	Caenorhabditis elegans	-	-	228-423	Glc	0.64201	0.171332	0.470678	MEDIUM		0.115057	0.00572351	0.64201	0.171332	0.0115366	0.0543401	Glycoprotein-N-acetylgalactosamine 3-beta-galactosyltransferase 1
CAB04033.2	O17751	GT43	Caenorhabditis elegans	-	-	38-262	Others	0.99776	0.000715711	0.997044	HIGH		0.000547433	6.41644e-05	0.000681876	0.000715711	0.000231305	0.99776	Galactosylgalactosylxylosylprotein 3-beta-glucuronosyltransferase (EC 2.4.1.135)
CAB05617.3	Q9XU73	GT43	Caenorhabditis elegans	-	-	61-287	Others	0.996228	0.00134978	0.994878	HIGH		0.000745958	6.82467e-05	0.00134978	0.00131553	0.000292638	0.996228	Galactosylgalactosylxylosylprotein 3-beta-glucuronosyltransferase (EC 2.4.1.135)
CAA15837.2	O62113	GT43	Caenorhabditis elegans	-	-	56-282	Others	0.995988	0.00150271	0.994485	HIGH		0.000828803	9.49747e-05	0.00148133	0.00150271	0.000104437	0.995988	Galactosylgalactosylxylosylprotein 3-beta-glucuronosyltransferase (EC 2.4.1.135)
NP_001299964.1	A0A0K3AUF6	GT43	Caenorhabditis elegans	-	-	52-332	Others	0.995236	0.00209996	0.993136	HIGH		0.000721352	0.000301643	0.00132587	0.00209996	0.000315111	0.995236	Galactosylgalactosylxylosylprotein 3-beta-glucuronosyltransferase (EC 2.4.1.135)
CAB03531.2	O02304	GT43	Caenorhabditis elegans	-	-	42-268	Others	0.99636	0.00130501	0.995055	HIGH		0.000878718	8.67342e-05	0.00110319	0.00130501	0.00026644	0.99636	Galactosylgalactosylxylosylprotein 3-beta-glucuronosyltransferase (EC 2.4.1.135)
CAB05467.2	O17708	GT43	Caenorhabditis elegans	-	-	61-285	Others	0.992333	0.00465805	0.987675	HIGH		0.00465805	9.46262e-05	0.00127516	0.0014972	0.000142413	0.992333	Galactosylgalactosylxylosylprotein 3-beta-glucuronosyltransferase (EC 2.4.1.135)
CAB05626.2	O02320	GT49	Caenorhabditis elegans	-	-	94-299	GlcNAc	0.920061	0.0539723	0.866088	HIGH		0.00625716	0.00159682	0.01385	0.920061	0.00426319	0.0539723	B3GNT1, Beta-1,3-N-acetylGucosamiNylTransferase 1, homolog
CAB05464.2	O02230	GT49	Caenorhabditis elegans	-	-	73-385	GlcNAc	0.930872	0.0448869	0.885985	HIGH		0.00610535	0.00155808	0.0139752	0.930872	0.00260233	0.0448869	B3GNT1, Beta-1,3-N-acetylGucosamiNylTransferase 1, homolog
CAE17897.1	Q7YWW9	GT49	Caenorhabditis elegans	-	-	79-392	GlcNAc	0.813161	0.0955826	0.717578	HIGH		0.0305164	0.00170418	0.0558953	0.813161	0.00314076	0.0955826	B3GNT1, Beta-1,3-N-acetylGucosamiNylTransferase 1, homolog
AAC17758.2	H2KYW8	GT49	Caenorhabditis elegans	-	-	24-313	GlcNAc	0.898383	0.0393452	0.859038	HIGH		0.0265327	0.00186861	0.0393452	0.898383	0.00265609	0.0312146	B3GNT1, Beta-1,3-N-acetylGucosamiNylTransferase 1, homolog
AAF99911.2	A0A0K3AUU0	GT49	Caenorhabditis elegans	-	-	26-340	GlcNAc	0.764948	0.150381	0.614567	HIGH		0.0382192	0.00169285	0.0124605	0.764948	0.150381	0.0322991	B3GNT1, Beta-1,3-N-acetylGucosamiNylTransferase 1, homolog
CAB07595.1	G5EGF3	GT49	Caenorhabditis elegans	-	-	91-405	GlcNAc	0.558776	0.248066	0.31071	LOW		0.0975034	0.00511615	0.0762439	0.558776	0.0142945	0.248066	B3GNT1, Beta-1,3-N-acetylGucosamiNylTransferase 1, homolog
CAE17756.1	Q7YTQ3	GT49	Caenorhabditis elegans	-	-	85-401	GlcNAc	0.857617	0.135623	0.721994	HIGH		0.00439604	0.000474097	0.000863856	0.857617	0.00102554	0.135623	B3GNT1, Beta-1,3-N-acetylGucosamiNylTransferase 1, homolog
CAA91401.2	G5EGS9	GT7	Caenorhabditis elegans	-	-	162-360	GalNAc	0.471134	0.455776	0.0153586	LOW		0.455776	0.471134	0.0251512	0.0250727	0.00292948	0.0199366	N-acetyllactosamine synthase
CAB04823.1	O45819	GT8-Glycogenin	Caenorhabditis elegans	-	-	3-237	Glc	0.665671	0.227168	0.438502	MEDIUM		0.0330904	0.00343628	0.665671	0.227168	0.00607086	0.0645639	GlYcoGenin like
CAB60560.1	-	GT8-Glycogenin	Caenorhabditis elegans	-	-	31-171	Glc	0.708789	0.17345	0.535338	HIGH		0.0218853	0.00564383	0.708789	0.17345	0.0127398	0.077492	Hypothetical protein Y73F8A.31
AAB94141.4	O45819	GT8-Glycogenin	Caenorhabditis elegans	-	-	35-41	Glc	0.621455	0.270138	0.351318	MEDIUM		0.0256748	0.0181046	0.621455	0.270138	0.00891216	0.0557156	GlYcoGenin like
CAO78709.1	G5ECZ5	GT8-Glycogenin	Caenorhabditis elegans	-	-	24-268	GlcNAc	0.522859	0.429211	0.0936471	LOW		0.00661581	0.00211379	0.429211	0.522859	0.00244845	0.036752	Uncharacterized protein
CAA91997.4	Q21389	GT8-Lrg	Caenorhabditis elegans	LGE1	N-term	46-313	Others	0.834742	0.0976114	0.737131	HIGH		0.0131986	0.00374653	0.0262736	0.0244278	0.0976114	0.834742	Glycosyltransferase-like protein LARGE (EC 2.4.-.-)
AAS65101.1	Q8IPN4	GT2-Chitin-HAS	Drosophila melanogaster	-	-	582-904	GlcNAc	0.991148	0.00526177	0.985886	HIGH		0.00139287	0.000462089	0.00526177	0.991148	0.000362626	0.00137296	Krotzkopf verkehrt, isoform A (Krotzkopf verkehrt, isoform C) (EC 2.4.1.16)
AAF51798.3	Q9VNW7	GT2-Chitin-HAS	Drosophila melanogaster	-	-	568-874	GlcNAc	0.975178	0.0136727	0.961506	HIGH		0.00337827	0.00136659	0.0136727	0.975178	0.00082714	0.00557691	Chitin synthase 2, isoform D (EC 2.4.1.16)
AAN10543.1	Q8IPK4	GT2-CWR	Drosophila melanogaster	GLT25	N-term	31-146	Gal	0.749729	0.128864	0.620865	HIGH		0.749729	0.0236206	0.0536156	0.128864	0.00690978	0.0372607	Glycosyltransferase 25 family member (EC 2.-.-.-)
AAF53817.1	Q9VIU7	GT2-DPs	Drosophila melanogaster	DPM1	-	9-237	Man	0.945587	0.0443891	0.901198	HIGH		0.00415391	0.000520945	0.0443891	0.00245978	0.945587	0.00288919	Probable dolichol-phosphate mannosyltransferase (DPM synthase) (Dolichol-phosphate mannose synthase) (EC 2.4.1.83) (Dolichyl-phosphate beta-D-mannosyltransferase) (Mannose-P-dolichol synthase) (MPD synthase)
AAN10543.1	Q8IPK4	GT25	Drosophila melanogaster	GLT25	C-term	335-532	GlcNAc	0.713331	0.266876	0.446454	MEDIUM		0.00533287	0.0013072	0.266876	0.713331	0.00144834	0.0117045	Glycosyltransferase 25 family member (EC 2.-.-.-)
ABL75647.1	-	GT27	Drosophila melanogaster	-	-	21-123	GalNAc	0.870409	0.0903208	0.780088	HIGH		0.00927651	0.870409	0.0185476	0.0903208	0.00261337	0.00883241	IP16941p
AAO85275.1	Q7Z1Z0	GT31-Chsy	Drosophila melanogaster	-	N-term	65-305	Others	0.753714	0.10474	0.648974	HIGH		0.0924783	0.00897241	0.0353048	0.10474	0.00479072	0.753714	Hexosyltransferase (EC 2.4.1.-)
AAF48225.2	Q9VYH2	GT31-Chsy	Drosophila melanogaster	-	-	27-346	Gal	0.825332	0.0870127	0.73832	HIGH		0.825332	0.00355466	0.0308783	0.0463835	0.00683867	0.0870127	Hexosyltransferase (EC 2.4.1.-)
AAM68705.2	A1Z8R4	GT31-Galt-Gnt	Drosophila melanogaster	-	-	59-360	GlcNAc	0.617535	0.307925	0.309611	LOW		0.307925	0.00189596	0.0623479	0.617535	0.00258226	0.00771418	Hexosyltransferase (EC 2.4.1.-)
AAO41403.1	A1Z8R6	GT31-Galt-Gnt	Drosophila melanogaster	-	-	134-438	Gal	0.60856	0.340626	0.267934	LOW		0.60856	0.0015922	0.034158	0.340626	0.00470113	0.010362	Hexosyltransferase (EC 2.4.1.-)
AAL28774.1	Q95RP8	GT31-Galt-Gnt	Drosophila melanogaster	-	-	88-317	Glc	0.444132	0.308601	0.135531	LOW		0.308601	0.00933556	0.444132	0.164388	0.012249	0.0612939	Hexosyltransferase (EC 2.4.1.-)
AAM68706.2	A1Z8R5	GT31-Galt-Gnt	Drosophila melanogaster	-	-	89-393	Gal	0.43999	0.279317	0.160672	LOW		0.43999	0.00322615	0.0530002	0.279317	0.00360257	0.220864	Hexosyltransferase (EC 2.4.1.-)
AAF47918.1	Q9VZA6	GT31-Galt-Gnt	Drosophila melanogaster	-	-	136-387	Gal	0.957297	0.0231348	0.934162	HIGH		0.957297	0.000890568	0.00893015	0.0231348	0.00174987	0.00799774	Hexosyltransferase (EC 2.4.1.-)
AAF52604.2	Q9VLT0	GT31-Galt-Gnt	Drosophila melanogaster	-	-	173-406	Gal	0.529477	0.320001	0.209476	LOW		0.529477	0.0160517	0.320001	0.0843448	0.0108545	0.0392714	Hexosyltransferase (EC 2.4.1.-)
AAF52606.2	Q9VLS8	GT31-Galt-Gnt	Drosophila melanogaster	-	-	341-575	Gal	0.60216	0.230472	0.371687	MEDIUM		0.60216	0.011606	0.230472	0.106253	0.0109297	0.0385789	LD29807p
AAF52723.1	E2QCQ7	GT31-Glt	Drosophila melanogaster	-	-	100-289	Gal	0.944351	0.020914	0.923437	HIGH		0.944351	0.00117243	0.0171849	0.0137945	0.00258323	0.020914	Core 1 galactosyltransferase A, isoform B (EC 2.4.1.122)
AAF51199.2	Q9VQH4	GT31-Glt	Drosophila melanogaster	-	-	62-236	Gal	0.896766	0.0386797	0.858086	HIGH		0.896766	0.0104942	0.0386797	0.026734	0.00492075	0.0224054	IP15602p
ABC66121.2	Q2PE08	GT31-Glt	Drosophila melanogaster	-	-	81-285	Gal	0.992126	0.00275139	0.989375	HIGH		0.992126	0.000196623	0.00247903	0.00275139	0.000547426	0.00189919	Uncharacterized protein, isoform A (EC 2.4.1.122)
AAF51197.1	Q9VQH6	GT31-Glt	Drosophila melanogaster	-	-	85-273	Gal	0.960101	0.015391	0.94471	HIGH		0.960101	0.000977393	0.00651304	0.015391	0.00181964	0.0151984	Uncharacterized protein (EC 2.4.1.122)
ABE01212.1	Q1WWC4	GT31-Glt	Drosophila melanogaster	-	-	63-234	Gal	0.970763	0.0135828	0.95718	HIGH		0.970763	0.000878169	0.00844746	0.0135828	0.0016681	0.00466043	IP13057p
AAN71398.1	Q7JRF9	GT31-Glt	Drosophila melanogaster	-	-	95-284	Gal	0.924591	0.028341	0.89625	HIGH		0.924591	0.00144561	0.0248616	0.017733	0.00302784	0.028341	RE41083p
AAF51196.3	Q9VQH7	GT31-Glt	Drosophila melanogaster	-	-	242-492	Gal	0.867433	0.0827646	0.784669	HIGH		0.867433	0.00528374	0.0827646	0.0125922	0.0140944	0.0178318	Uncharacterized protein (EC 2.4.1.122)
AAF51193.3	Q9VQI0	GT31-Glt	Drosophila melanogaster	-	-	77-231	Gal	0.582311	0.259078	0.323234	LOW		0.582311	0.0291605	0.0336319	0.259078	0.0515662	0.0442526	Uncharacterized protein (EC 2.4.1.122)
AAF48917.4	Q9VWM1	GT31-Glt	Drosophila melanogaster	-	-	105-300	Gal	0.889516	0.0657598	0.823757	HIGH		0.889516	0.00124002	0.0657598	0.0208268	0.00269379	0.0199633	Twiggy, isoform C (Twiggy, isoform E) (EC 2.4.1.122)
AAF52326.3	Q9VMJ0	GT31-Glt	Drosophila melanogaster	-	-	273-474	Others	0.533748	0.169506	0.364242	MEDIUM		0.125994	0.0018778	0.169506	0.161572	0.00730239	0.533748	Uncharacterized protein, isoform A (EC 2.4.1.-)
ABC66141.1	A8JNT2	GT31-Glt	Drosophila melanogaster	-	-	172-355	Others	0.908438	0.0381914	0.870246	HIGH		0.0381914	0.00196145	0.0255973	0.0213628	0.0044495	0.908438	Uncharacterized protein, isoform B (Uncharacterized protein, isoform C) (EC 2.4.1.-) (EC 2.4.1.122)
AAF56516.3	Q9VBL5	GT32	Drosophila melanogaster	-	-	107-368	GalNAc	0.741892	0.103426	0.638466	HIGH		0.103426	0.741892	0.034705	0.0881807	0.0104571	0.0213393	Alpha1,4-galactosyltransferase 2 (EC 2.4.1.-)
AAN10556.1	Q7JRE1	GT49	Drosophila melanogaster	-	-	212-537	Others	0.46726	0.327789	0.139471	LOW		0.0265514	0.0282824	0.147037	0.327789	0.00307993	0.46726	RE67001p
AAF47166.1	Q9W1A7	GT49	Drosophila melanogaster	-	-	51-371	GlcNAc	0.786575	0.124924	0.661651	HIGH		0.0630689	0.00980921	0.0123843	0.786575	0.00323841	0.124924	GH04269p
ACJ23454.1	B6IDY0	GT49	Drosophila melanogaster	-	-	87-416	Others	0.644812	0.291011	0.353801	MEDIUM		0.0412023	0.00835221	0.0115712	0.291011	0.0030516	0.644812	FI06150p (Fragment)
AAL49129.1	Q8SYJ5	GT49	Drosophila melanogaster	-	-	130-486	GlcNAc	0.599923	0.211885	0.388038	MEDIUM		0.116434	0.00791588	0.0608911	0.599923	0.00295136	0.211885	RE56074p
AAO85275.1	Q7Z1Z0	GT7	Drosophila melanogaster	-	C-term	564-732	GalNAc	0.689375	0.149987	0.539388	HIGH		0.149987	0.689375	0.0419929	0.0525649	0.00759047	0.0584895	Hexosyltransferase (EC 2.4.1.-)
AAF58819.1	A1Z863	GT7	Drosophila melanogaster	-	-	343-490	Glc	0.479479	0.35987	0.119609	LOW		0.149308	0.35987	0.479479	0.00722173	0.000911087	0.00321024	Hexosyltransferase (EC 2.4.1.-)
AAM51981.1	Q9W2J6	GT8-Glycogenin	Drosophila melanogaster	-	-	4-247	Glc	0.982944	0.00938481	0.973559	HIGH		0.00196927	0.0003184	0.982944	0.00475056	0.000633263	0.00938481	Glycogenin, isoform B (EC 2.4.1.186) (RE02181p)
AAF47138.1	Q9W1D1	GT8-Lrg	Drosophila melanogaster	-	-	168-451	Others	0.993177	0.00388487	0.989292	HIGH		0.000668061	0.000910579	0.00388487	0.00104215	0.000317428	0.993177	FI19481p1 (Xyloside xylosyltransferase) (EC 2.4.2.26)
AAF56394.2	Q9VBY3	GT8-XylT	Drosophila melanogaster	-	-	50-317	Others	0.984442	0.00979236	0.974649	HIGH		0.00371664	0.000294296	0.00979236	0.00163848	0.000116488	0.984442	IP22168p (Shams) (EC 2.4.2.26)
BAD18395.1	Q6ZNI0	GT14	Homo sapiens	GCNT7	-	112-393	GlcNAc	0.992347	0.00391564	0.988432	HIGH		0.00127102	0.000284534	0.00391564	0.992347	0.000288926	0.0018927	Beta-1,3-galactosyl-O-glycosyl-glycoprotein beta-1,6-N-acetylglucosaminyltransferase 7 (EC 2.4.1.-)
Q5T4J0.2	Q5T4J0	GT14	Homo sapiens	-	-	100-306	GlcNAc	0.623832	0.354611	0.26922	LOW		0.00261528	0.00126226	0.015699	0.623832	0.0019803	0.354611	GCNT6_HUMAN RecName: Full=Beta-1,3-galactosyl-O-glycosyl-glycoprotein beta-1,6-N-acetylglucosaminyltransferase 6
NP_078932.2	Q8NBJ5	GT2-CWR	Homo sapiens	GT251	N-term	53-190	GlcNAc	0.563053	0.40636	0.156693	LOW		0.0102416	0.00250189	0.40636	0.563053	0.00623417	0.0116086	Procollagen galactosyltransferase 1 (EC 2.4.1.50) (Collagen beta(1-O)galactosyltransferase 1) (ColGalT 1) (Glycosyltransferase 25 family member 1) (Hydroxylysine galactosyltransferase 1)
AAG60609.1	Q8IYK4	GT2-CWR	Homo sapiens	GT252	N-term	61-191	Glc	0.558786	0.417178	0.141608	LOW		0.0113894	0.00107354	0.558786	0.417178	0.00214513	0.00942799	Procollagen galactosyltransferase 2 (EC 2.4.1.50) (Collagen beta(1-O)galactosyltransferase 2) (ColGalT 2) (Glycosyltransferase 25 family member 2) (Hydroxylysine galactosyltransferase 2)
AAQ88849.1	Q6UX72	GT31-Galt-Gnt	Homo sapiens	B3GN9	-	117-376	GlcNAc	0.969077	0.0145518	0.954526	HIGH		0.0145518	0.00156564	0.00709147	0.969077	0.000918943	0.00679468	UDP-GlcNAc:betaGal beta-1,3-N-acetylglucosaminyltransferase 9 (BGnT-9) (Beta-1,3-Gn-T9) (Beta-1,3-N-acetylglucosaminyltransferase 9) (Beta3Gn-T9) (EC 2.4.1.-)
EAW91438.1	-	GT54	Homo sapiens	-	-	41-206	GlcNAc	0.959469	0.0177746	0.941694	HIGH		0.00486582	0.00108379	0.0154193	0.959469	0.00138733	0.0177746	hCG1797874, isoform CRA_a, partial
EAW91455.1	-	GT54	Homo sapiens	-	-	0-111	GlcNAc	0.572959	0.138956	0.434003	HIGH		0.072264	0.108911	0.138956	0.572959	0.0174583	0.0894514	hCG1811644
AAQ01588.1	Q7Z4J2	GT6	Homo sapiens	GL6D1	-	79-302	Gal	0.732148	0.256455	0.475693	MEDIUM		0.732148	0.000536169	0.00620555	0.00434773	0.000307933	0.256455	Putative glycosyltransferase 6 domain-containing protein 1 (EC 2.4.1.-) (Galactosyltransferase family 6 domain-containing 1)
AAF67484.1	Q68CQ7	GT8-GAUT	Homo sapiens	GL8D1	-	65-351	Glc	0.501773	0.131794	0.369979	MEDIUM		0.131794	0.111345	0.501773	0.130069	0.0738085	0.0512096	Glycosyltransferase 8 domain-containing protein 1 (EC 2.4.1.-)
CAC19667.1	Q9H1C3	GT8-GAUT	Homo sapiens	GL8D2	-	50-335	Glc	0.499896	0.218378	0.281518	LOW		0.0863973	0.0162011	0.499896	0.218378	0.0895832	0.0895449	Glycosyltransferase 8 domain-containing protein 2 (EC 2.4.1.-)
CAA85120.1	P38287	GT32	Saccharomyces cerevisiae	CSH1	-	64-232	Man	0.98288	0.00638507	0.976495	HIGH		0.00120151	0.0024498	0.00570446	0.00638507	0.98288	0.00137915	Mannosyl phosphorylinositol ceramide synthase CSH1 (EC 2.-.-.-) (CSG1/SUR1 homolog 1)
