# Supplementary material for: Deep evolutionary analysis reveals the design principles of fold A glycosyltransferases
Source: eLife journal article supplement (doi:10.7554/elife.54532), 2020-04-01
Supplement: supp [file elife-54532-supp-v1.zip]

|            | 1                                                                                   | 13 | 17 | 20        | 32                                 | 34 | 86                    | 87                                                |
|------------|-------------------------------------------------------------------------------------|----|----|-----------|------------------------------------|----|-----------------------|---------------------------------------------------|
| consensus  | TKV VVV G . . . . . AYN . . . . . G.E.YKG . . . . . L . . . . RL . L . K . S        |    |    | L . . L   | KEV . . . . . IVV                  |    | V . . . . . VF        | . . . . . L . . . . . DDD                         |
| GT27_2d7i  | NTS III P . . . . . FHNE . . . . . GWS.S.L . . . . . L . . . . RT.V . H . S         |    |    | V . . L   | AEI . . . . . VLV                  |    | I . . . . . TF        | . . . . . L . . . . . DSH                         |
| GT43_lfgg  | TIY VVT P . . . . . TYARLV . . . . . QKA.E.L . . . . . V . . . . RL.S . Q . T       |    |    | L . . S   | . . . . . HW                       |    | V . . . . . YF        | . . . . . A . . . . . DDD                         |
| GT7_lfgx   | KVA III P . . . . . FRN . . . . . RQE.H.L . . . . . K . . . . YW.L . Y . Y          |    |    | L . . H   | . . . . . YG                       |    | F . . . . . VF        | . . . . . S . . . . . DVD                         |
| GT6_1ljz   | TIG LTM F . . . . . AIKK . . . . . YVA.F.L . . . . . K . . . . LF.L . E . T         |    |    | A . . E   | . . . . . HY                       |    | V . . . . . YV        | . . . . . V . . . . . DVD                         |
| GT64_1omx  | SFT LLM Q . . . . . TYN . . . . . RTD.L.L . . . . . L . . . . RL.L . N . H          |    |    | Y . . Q   | HKV . . . . . IVV                  |    | V . . . . . LM        | . . . . . V . . . . . DDD                         |
| GT15_1s4n  | KAC YVT L . . . . . VRNK . . . . . ELK.G.L . . . . . L . . . . SS.I . K . Y         |    |    | V . . E   | . . . . . PW                       |    | Y . . . . . NR        | . . . . . V . . . . . EPD                         |
| GT78_2bo4  | .SL VVFP . . . . . FKHE . . . . . HPE.V.L . . . . . L . . . . HN.V . R . V          |    |    | A . . E   | HEV . . . . . LCI                  |    | I . . . . . HF        | . . . . . Y . . . . . DAD                         |
| GT6_2rj9   | TIG LTV F . . . . . AIKK . . . . . YVA.F.L . . . . . K . . . . LF.L . E . T         |    |    | A . . E   | . . . . . HY                       |    | V . . . . . VC        | . . . . . V . . . . . DVD                         |
| GT55_2zu7  | GKA VIV P . . . . . KNE . . . . . KLH.L.V . . . . . D . . . . GV.L . K . A          |    |    | I . . .   | . . . . . PI                       |    | V . . . . . GF        | . . . . . V . . . . . DAD                         |
| GT81_3ckj  | TIS VVLP . . . . . ALD . . . . . EED.T.I . . . . . G . . . . SV.I . D . S           |    |    | I . . S   | DEL . . . . . IVL                  |    | V . . . . . VF        | . . . . . V . . . . . DSD                         |
| GT8_3tzt   | ADA LLL T . . . . . LDEN . . . . . YIP.Q . . . . . K . . . . VL . . T . S           |    |    | I . . Y   | . . . . . DV                       |    | I . . . . . LY        | . . . . . L . . . . . DPD                         |
| GT13_5ggf  | .VP VAV I . . . . . AGN . . . . . RPN.Y.L . . . . . Y . . . . RM.L . R . S          |    |    | L . . L   | . . . . . MI                       |    | A . . . . . VV        | . . . . . L . . . . . EED                         |
| GT16_5vcml | .LV LVV Q . . . . . VHN . . . . . RPE.Y.L . . . . . R . . . . LL.L . D . S          |    |    | L . . R   | . . . . . LV                       |    | I . . . . . LF        | . . . . . L . . . . . EED                         |
| lbif       | TLI VMV GLP . AR . . . . . G . . . . . KTY.ISK . . . . . KL.T . R . Y               |    |    | L . . N   | P . . T . . . . . REF              |    | A . . . . . VF        | . . . . . D . . . . . A . . . . . T . .           |
| lc0k       | KRV AVL G . . . . . S . . . . . G . . . . . VIG . . . . . L . . . . SS.A . L . I    |    |    | L . . A   | S . . V . . . . . HIL              |    | . . . . . S . . . . . | . . . . .                                         |
| ldli       | MKI VVG . . . . . S . . . . . G . . . . . YVG . . . . . L . . . . SL.G . V . L      |    |    | L . . S   | E . . V . . . . . TIV              |    | . . . . . VI          | . . . . . I . . . . . A . . . . .                 |
| le8c       | . . . . .                                                                           |    |    | . . . . . | . . . . .                          |    | . . . . .             | . . . . . AGDLFV . AVVGH . . . . . Q . . . . .    |
| lex2       | PLI LAS Q . . . . .                                                                 |    |    | L . . D   | P . . Y . . . . . S . . . . . IIV  |    | . . . . .             | . . . . . V . . . . . QW . . . . .                |
| lfpl       | STL VDV G . . . . . GG . . . . . S . . . . . G . . . . . RN.L . E . L               |    |    | I . . I   | K . . G . . . . . INF              |    | A . . . . . MI        | . . . . . L . . . . . K . . . . .                 |
| lg64       | III VFT GN . . . . . GK . . . . . G . . . . . KTT.AAF . . . . . GT.A . A . R        |    |    | A . . V   | N . . V . . . . . GVV              |    | M . . . . . VV        | . . . . . L . . . . . D . . . . . E . .           |
| lgdt       | . . . . .                                                                           |    |    | . . . . . | K . . AN . . . . . R . . . . . IFT |    | I . . . . . LV        | . . . . . R . . . . . KKLDR                       |
| lhtw       | IMV YLNGDL . . . . . GA . . . . . G . . . . . KTT.LTR . . . . . GM.L . Q . G        |    |    | I . . G   | H . . Q . . . . . GNVK             |    | I . . . . . YH        | . . . . . F . . . . . KKLDR                       |
| lj6u       | .KI HFV G . . . . . IG . . . . . G . . . . . IG . . . . . S . . . . AV.AL . H       |    |    | E . . F   | D . . V . . . . . YGS              |    | . . . . . LV          | . . . . . IKTPA . . . . . V . . . . . R . . . . . |
| lj7k       | . . . . .                                                                           |    |    | L . . Q   | T . . N . . . . . IHV              |    | V . . . . . LF        | . . . . . I . . . . . D . . . . .                 |
| ljay       | MRV ALL G . . . . . GT . . . . . G . . . . . NLG . . . . . K . . . . GL.A . L . R   |    |    | L . . A   | E . . I . . . . . VVG              |    | I . . . . . AV        | . . . . . L . . . . . T . . . . .                 |
| ljbw       | . . . . .                                                                           |    |    | . . . . . | . . . . .                          |    | . . . . .             | . . . . . HSFPLA . . . . . K . . . . .            |
| llua       | KKA VVLA . . . . . GT . . . . . G . . . . . PVG . . . . . M . . . . RS.A . A . L    |    |    | L . . A   | . . . . . EV                       |    | F . . . . . VV        | . . . . . T . . . . . A . . . . .                 |
| lmg5       | KNV IFVA . . . . . GL . . . . . G . . . . . GIG . . . . . L . . . . DT.S . K . E    |    |    | L . . L   | KNL . . . . . VIL                  |    | V . . . . . LI        | . . . . . N . . . . . G . . . . .                 |
| lo57       | . . . . .                                                                           |    |    | . . . . . | . . . . .                          |    | V . . . . . LI        | . . . . . I . . . . . D . . . . .                 |
| lofd       | . . . . .                                                                           |    |    | . . . . . | . . . . . NFA . . . . . VVH        |    | . . . . .             | . . . . .                                         |
| lofu       | IKV IGV G . . . . . GG . . . . . GG . . . . . N . . . . VN . . . . . HM.A . K . N   |    |    | V . . .   | E . . F . . . . . ICA              |    | V . . . . . FI        | . . . . . T . . . . . T . . . . .                 |
| lpjg       | EVV LVGA . G . . . . . P . . . . . G . . . . . D . . . . . AGL.LT . . . . . LKG     |    |    | L . . .   | AD . . I . . . . . VVY             |    | V . . . . . VR        | . . . . . L . . . . . K . . . . .                 |
| lpn0       | CDV LIV G . . . . . A . . . . . G . . . . . PAG . . . . . L . . . . MA.A . R . V    |    |    | L . . S   | K . . V . . . . . RII              |    | . . . . .             | . . . . . I . . . . . V . . . . .                 |
| lsay       | GKV VIL G . . . . . G . . . . . G . . . . . VVG . . . . . T . . . . EA.A . K . M    |    |    | A . . V   | QVQ . . . . . IFD                  |    | L . . . . . LI        | . . . . . G . . . . . A . . . . .                 |
| lx7d       | RK ALI G . . . . . N . . . . . G . . . . . AQS . . . . . E . . . . FQ.A . L . A     |    |    | F . . H   | E . . EI . . . . . VAY             |    | I . . . . . IT        | . . . . . T . . . . . V . . . . .                 |
| lxzp       | . . . . .                                                                           |    |    | . . . . . | . . . . . I . . . . . RLS          |    | . . . . . K . AD      | . . . . . IV . . . . . LF . . . . . V . . . . .   |
| ly81       | RKI ALVG . . . . . AS . . . . . KN.PAKY . . . . . N . . . . II.L . K . D            |    |    | L . . L   | E . . V . . . . . LPV              |    | V . . . . . IV        | . . . . . F . . . . . V . . . . .                 |
| ly8q       | SRV LVVG . . . . . L . . . . . K . . . . . GLG . . . . . A . . . . EI.A . K . N     |    |    | L . . I   | KGL . . . . . TML                  |    | A . . . . . VC        | . . . . . L . . . . . T . . . . .                 |
| lye8       | .KI IIT GEP . . . . . GV . . . . . G . . . . . KTT.LVK . . . . . KI.V . E . R       |    |    | L . . G   | R . . A . . . . . IGF              |    | I . . . . . II        | . . . . . I . . . . . D . . . . . E . . . . .     |
| 2afh       | . . . . .                                                                           |    |    | . . . . . | . . . . . I . . . . . IHI          |    | G . . . . . IS        | . . . . . VQ . . . . . SE . . . . .               |
| 2bln       | MKT VVFA . . . . . Y . . . . . H . . . . . DMG . . . . . C . . . . LG.I . E . A     |    |    | L . . L   | E . . I . . . . . S . . . . . AIF  |    | V . . . . . IF        | . . . . . S . . . . . F . . . . .                 |
| 2esn       | . . . . .                                                                           |    |    | L . . M   | . . . . .                          |    | . . . . . LS          | . . . . .                                         |
| 2iut       | . . . . .                                                                           |    |    | I . . L   | A . . R . . . . . LIM              |    | V . . . . . VV        | . . . . . V . . . . . D . . . . . E . . . . .     |
| 2nac       | MHV GTVA . . . . . A . . . . . G . . . . . RIG . . . . . L . . . . AV.L . R . R     |    |    | L . . A   | VHL . . . . . HYT                  |    | V . . . . . VT        | . . . . . L . . . . . N . . . . .                 |
| 2nu7       | TKV ICG . . . . . FT . . . . . G . . . . . SQG . . . . . T . . . . FH.S . E . Q     |    |    | A . . I   | K . . M . . . . . VGG              |    | A . . . . . SV        | . . . . . I . . . . . Y . . . . .                 |
| 2vav       | NCV IVCH . . . . . T.L.T . . . . . S . . . . . SAH . . . . . VTS.WW . . . . . PT.L  |    |    | F . . G   | R . . Y . . . . . FICL             |    | A . . . . . VV        | . . . . . G . . . . . A . . . . .                 |
| 3h2y       | ALV VKI V.D . . . . . I . . . . . F.D . . . . . LAVNA . . . . . F . . . . N . . . . |    |    | H . . .   | NKV . . . . . LLV                  |    | V . . . . . YV        | . . . . . V . . . . . G . . . . .                 |
| 3vth       | . . . . .                                                                           |    |    | . . . . . | . . . . .                          |    | . . . . .             | . . . . . FL . . . . .                            |
| 4elb       | . . . . .                                                                           |    |    | . . . . . | . . . . .                          |    | . . . . .             | . . . . . II . . . . .                            |
