# Supplementary material for: Deep evolutionary analysis reveals the design principles of fold A glycosyltransferases
Source: eLife journal article supplement (doi:10.7554/elife.54532), 2020-04-01
Supplement: supp [file elife-54532-supp-v1.zip]

Archive with 21 entries (21 files):
- elife_poa_e54532_Figure_3_figure_supplement_1.pdf
- elife_poa_e54532_Supplementary_file_2.xlsx
- elife_poa_e54532_Supplementary_file_1.xlsx
- elife_poa_e54532_Figure_7_source_data_1.xlsx
- elife_poa_e54532_Supplementary_file_3.xlsx
- elife_poa_e54532_Figure_3_figure_supplement_3.pdf
- elife_poa_e54532_Figure_3_source_data_1.xlsx
- elife_poa_e54532_Figure_6_source_data_1.xlsx
- elife_poa_e54532_Figure_3_source_data_4.txt
- elife_poa_e54532_Figure_6_figure_supplement_1.pdf
- elife_poa_e54532_Figure_2_figure_supplement_3.pdf
- elife_poa_e54532_Figure_6_source_data_3.xlsx
- elife_poa_e54532_Transparent_Reporting_File.pdf
- elife_poa_e54532_Figure_6_figure_supplement_2.pdf
- elife_poa_e54532_Figure_3_source_data_3.txt
- elife_poa_e54532_Figure_2_figure_supplement_2.pdf
- elife_poa_e54532_Figure_3_figure_supplement_2.pdf
- elife_poa_e54532_Figure_3_source_data_2.xlsx
- elife_poa_e54532_Figure_6_source_data_2.xlsx
- elife_poa_e54532_Figure_1_source_data_1.xlsx
- elife_poa_e54532_Figure_2_figure_supplement_1.pdf
