# Supplementary material for: Deep evolutionary analysis reveals the design principles of fold A glycosyltransferases
Source: eLife journal article supplement (doi:10.7554/elife.54532), 2020-04-01
Supplement: supp [file elife-54532-supp-v1.zip › elife_poa_e54532_Figure_1_source_data_1.xlsx]

## Sheet: Sheet1
Figure 1-source data 1: List of CAZy GT families. The structural fold and the number of sequences from each taxonomic group are shown. The number of sequences with structure or are characterized are also provided.
GT-Fam	3D Fold Status	Structure	Archaea	Bacteria	Eukaryota	Characterized
GT1	GT-B	0	225	14279	7508	396
GT2	GT-A	13	4165	183436	9235	281
GT3	GT-B	2	45	214	707	11
GT4	GT-B	29	3921	144721	2837	190
GT5	GT-B	8	137	9545	6656	83
GT6	GT-A	4	0	63	208	14
GT7	GT-A	4	1	23	309	33
GT8	GT-A	11	10	11006	1816	53
GT9	GT-B	4	33	25547	0	15
GT10	GT-B	1	1	481	584	45
GT11	GT-u	0	4	963	140	39
GT12	GT-A	0	0	34	37	4
GT13	GT-A	2	0	1	148	20
GT14	GT-A	2	0	943	426	26
GT15	GT-A	2	0	1	1401	6
GT16	GT-A	1	0	0	86	9
GT17	GT-A	0	0	190	147	3
GT18	GT-B	1	0	0	27	6
GT19	GT-B	1	0	9785	13	6
GT20	GT-B	14	80	6876	1287	53
GT21	GT-A	0	66	1032	125	12
GT22	GT-C	0	0	81	1080	9
GT23	GT-B	2	0	666	97	10
GT24	GT-A	2	0	0	283	9
GT25	GT-A	0	0	5285	149	18
GT26	GT-u	1	2	9205	2	6
GT27	GT-A	8	0	42	328	54
GT28	GT-B	3	28	20080	84	11
GT29	GT-u	6	1	9	697	73
GT30	GT-B	2	0	9741	21	20
GT31	GT-A	1	0	8	1594	48
GT32	GT-A	0	1	2993	932	21
GT33	GT-B	0	0	0	267	3
GT34	GT-A	1	0	1	556	11
GT35	GT-B	10	237	14112	506	55
GT37	GT-B	1	0	0	126	4
GT38	GT-B	1	0	140	0	6
GT39	GT-C	2	1	1772	1114	23
GT40	GT-A	0	0	0	46	2
GT41	GT-B	5	0	3221	444	17
GT42	GT-u	2	0	355	0	21
GT43	GT-A	3	0	0	284	12
GT44	GT-u	7	0	904	0	10
GT45	GT-A	1	1	149	0	5
GT47	GT-B	0	0	6	949	13
GT48	GT-u	0	0	0	1662	19
GT49	GT-A	0	0	0	139	3
GT50	GT-C	0	0	0	295	3
GT51	GT-u	8	2	48007	12	15
GT52	GT-B	1	0	757	0	7
GT53	GT-u	1	0	1603	0	6
GT54	GT-A	0	0	2	184	4
GT55	GT-A	2	54	45	8	6
GT56	GT-B	0	0	2990	0	1
GT57	GT-C	0	0	0	486	5
GT58	GT-C	0	0	0	459	9
GT59	GT-C	0	0	0	233	3
GT60	GT-A	0	0	247	43	3
GT61	GT-B	0	0	0	3173	11
GT62	GT-A	1	0	27	584	1
GT63	GT-B	1	0	0	0	1
GT64	GT-A	1	0	0	194	10
GT65	GT-B	3	0	0	79	4
GT66	GT-C	11	622	345	511	17
GT67	GT-A	0	0	0	127	7
GT68	GT-B	2	0	0	68	1
GT69	GT-u	0	0	0	2110	1
GT70	GT-B	1	0	288	0	2
GT71	GT-u	0	0	15	1057	6
GT72	GT-B	1	0	0	0	1
GT73	GT-u	0	0	1785	0	2
GT74	GT-u	0	0	14	3	1
GT75	GT-A	0	58	10	141	5
GT76	GT-u	0	0	47	324	2
GT77	GT-A	0	0	3	291	10
GT78	GT-A	1	0	4	3	2
GT79	GT-B	0	0	0	11	1
GT80	GT-B	6	0	151	0	12
GT81	GT-A	3	140	1612	0	8
GT82	GT-A	0	0	342	0	2
GT83	GT-C	1	5	10183	1	8
GT84	GT-A	0	2	1294	0	1
GT85	GT-C	0	0	669	0	2
GT87	GT-C	0	2	2517	0	2
GT88	GT-A	2	0	189	0	4
GT89	GT-u	0	0	801	0	2
GT90	GT-B	2	0	0	696	4
GT91	GT-u	0	0	0	148	9
GT92	GT-u	0	0	0	170	5
GT93	GT-B	0	0	6	0	1
GT94	GT-B	0	4	361	0	1
GT95	GT-u	0	0	0	78	3
GT96	GT-u	0	0	0	132	5
GT97	GT-u	0	0	104	0	2
GT98	GT-u	0	0	0	115	1
GT99	GT-u	1	0	89	0	2
GT100	GT-u	0	0	298	0	1
GT101	GT-u	2	0	371	1	2
GT102	GT-u	0	0	147	0	2
GT103	GT-u	0	0	62	0	2
GT104	GT-B	3	0	1949	0	4
GT105	GT-u	0	0	4	357	4
GT106	GT-u	0	0	0	459	4
GT107	GT-B	3	0	3601	0	4
GT108	GT-u	4	0	322	64	6
GT109	GT-u	0	0	0	59	1
GT110	GT-u	0	0	0	265	1
