# Supplementary material for: Deep evolutionary analysis reveals the design principles of fold A glycosyltransferases
Source: eLife journal article supplement (doi:10.7554/elife.54532), 2020-04-01
Supplement: supp [file elife-54532-supp-v1.zip › elife_poa_e54532_Figure_3_source_data_1.xlsx]

## Sheet: Sheet1
Figure 3-source data 1: List of GT-A fold families and subfamilies. For each of these families, the groups obtained by the pattern based classification are provided in the "GT-A pattern based group" column. Taxonomic distribution and a short description of these groups are also provided.
CAZy family	GT-A family	GT-A pattern based group	Description	Number of sequences in NCBInr	Taxonomic distribution
					Archaea	Bacteria	Protista	Fungi	Metazoa	Viridiplantae	Viruses	Unknown
GT2	GT2-B3GntL	GT2-B3GntL-1	beta-1,3-N-acetylglucosaminyltransferase-like sequences from GT2	683	-	-	51	-	621	7	-	4
	GT2-Bre3	GT2-Bre3-1	Close homologs of C. elegans bre3 and Drosophila egh GT2 sequences	696	184	106	11	125	264	1	-	5
	GT2-CWR	GT2-CWR_Csl-1	1st subgroup of GT2-CWR sub-family that includes bacterial Cellulose synthase like sequences	2229	-	2223	-	-	2	-	-	4
		GT2-CWR_Csl-2	2nd subgroup of GT2-CWR sub-family that includes bacterial and archaeal Cellulose synthase like sequences	3386	21	3363	-	2	-	-	-	-
	GT2-CeS	GT2-CeS-1	Cellulose synthases, Cellulose synthase like and related sequences	4142	102	1768	9	-	6	2255	-	2
		GT2-CeS_putative	Mostly bacterial putative cellulose synthesis related sequences	2112	1	2109	-	-	-	-	-	2
	GT2-Chitin-HAS	GT2-Chitin-HAS-1	Chitin and hyaluronan synthases of the GT2 family	15602	99	4813	231	8357	2005	38	42	17
	GT2-Class1	GT2-Class1-1	Large subgroup of GT2 sequences most with unknown functions	17387	143	17176	36	-	2	2	2	26
		GT2-Class1-2	Large subgroup of GT2 sequences most with unknown functions	7496	15	7455	1	-	2	1	-	22
	GT2-DPs	GT2-DPs_Bact	Mostly bacterial sequences that transfer sugar to Dolichol Phosphate acceptors (DPG/DPM)	34163	106	33968	2	4	12	6	6	59
		GT2-DPs_Mix	Mix of Dolichol phosphate glucose and mannose (DPG/DPM) glycosyltransferases	66769	3901	58998	300	1531	1376	479	2	182
	GT2-LpsRelated	GT2-LpsRelated-1	Prokaryotic GT2 sequences predicted to be involved in cell wall biosynthesis	25139	69	24998	3	-	4	10	24	31
GT6	GT6	GT6-Mix	homologs of GBGT1 GalNAc transferases and bacterial GT6 sequences	1067	1	211	4	3	834	2	10	2
		GT6-A3GALT	Homologs of Alpha 3 Galactosyltransferases (A3GALT)	704	-	-	-	-	703	-	-	1
		GT6-ABO	Blood ABO transferases	839	-	-	-	-	835	-	-	4
		GT6-GLT6D1	GLT6D1 related sequences	226	-	-	-	-	224	-	-	2
GT7	GT7	GT7-1	All GT7 sequences	4372	5	62	38	1	4238	7	4	17
GT8	GT8-Fun	GT8-Fun-1	Fungi and some bacterial GT8 sequences	738	-	-	28	701	-	9	-	-
	GT8-GATL	GT8-GATL-1	Mostly plant alpha-galacturonosyltransferase like sequences	144	-	-	4	-	6	134	-	-
	GT8-GAUT	GT8-GAUT-1	Mostly chordate and plant alpha-galacturonosyltransferase homologs	906	-	-	5	1	96	804	-	-
		GT8-GAUT-2	Alpha-galacturonosyltransferase homologs from multiple taxa	1714	-	-	8	-	106	1600	-	-
		GT8-GAUT-3	Plant alpha-galacturonosyltransferase homologs	503	-	-	-	-	-	503	-	-
		GT8-GAUT-4	alpha-galacturonosyltransferase homologs from multiple taxa	938	-	-	-	-	22	916	-	-
	GT8-Glycogenin	GT8-Glycogenin-1	Non-metazoan Glycogenin related sequences	1143	1	194	39	895	1	10	2	1
		GT8-Glycogenin-2	Glycogenin related sequences from all taxa	2937	-	51	34	1022	1778	17	21	14
	GT8-Lrg	GT8-Lrg-1	Eukaryotic GT8 Large domain xylosyltransferase homologs	1204	-	1	13	19	1156	-	-	15
	GT8-XylT	GT8-XylT-1	Eukaryotic GT8 xylosyltransferases	1252	-	-	4	27	1212	4	-	5
GT12	GT12	GT12-1	All GT12 sequences	1018	4	65	12	2	933	-	-	2
GT13	GT13	GT13-POMGNT1	POMGNT1 homologs	1272	-	225	85	2	663	295	-	2
		GT13-MGAT1	MGAT1 homologs	727	-	-	2	1	719	-	-	5
GT14	GT14	GT14-1	All GT14 sequences	8206	1	2790	77	11	3061	2229	10	27
GT15	GT15	GT15-1	All GT15 sequences	3547	-	12	26	3469	16	23	1	-
GT16	GT16	GT16-1	Protist, Plants, Nematode and other Metazoan MGAT2 homologs	499	-	-	14	-	275	210	-	-
		GT16-2	Arthropod and Chordate MGAT2 homologs	648	-	-	-	-	645	-	-	3
GT17	GT17	GT17-1	All GT17 sequences	2672	5	750	40	501	540	823	9	4
GT21	GT21	GT21-1	Mostly Prokaryotic members of the GT21 family	2958	72	2843	3	1	3	34	-	2
		GT21-2	Fungi nearly all Ascomycota GT21 members	458	-	-	-	455	-	3	-	-
		GT21-3	Fungi GT21 sequences	324	-	-	-	324	-	-	-	-
		GT21-4	Proteobacteria + Metazoa GT21 sequences	1331	-	737	2	-	587	-	-	5
GT24	GT24	GT24-1	All GT24 sequences	2756	-	-	139	935	1397	279	-	6
GT25	GT25	-	All GT25 sequences; No pattern based group	12296	-	10425	94	198	1450	21	96	12
GT27	GT27	GT27-1	All GT27 sequences	11047	2	186	193	-	10618	1	-	47
GT31	GT31-Chsy	GT31-Chsy-1	CHSY1 and CSS3 homologs	893	-	-	7	11	870	2	-	3
		GT31-Chsy-2	Metazoan CHPF homologs	898	-	-	3	-	890	-	2	3
	GT31-Euk	GT31-Euk-1	Mostly plant GT31 sequences with unknown functions	721	-	1	-	-	-	720	-	-
		GT31-Euk-2	Mostly plant GT31 sequences; Includes Avr9 elicitor from A. thaliana	1979	-	-	-	-	-	1979	-	-
		GT31-Mix-1	Mix of GT31 sequences from all taxonomic groups; Includes Sqv-2 from C. elegans	538	-	6	14	18	492	7	-	1
	GT31-Fringe	GT31-Fringe-1	GT31 Fringe homologs	1438	-	-	1	1	1411	18	-	7
	GT31-Glt	GT31-Glt_B3GLCT	Eukaryotic B3GLCT homologs	981	-	-	8	5	777	188	-	3
		GT31-Glt_C1GALT	Includes C1GALT1 and its close homologs	2153	-	33	169	52	1867	22	-	10
GT32	GT32	GT32-1	alpha 1,4-galactosyltranseferases from A. thaliana and plant GT32 sequences	585	-	6	1	17	-	561	-	-
		GT32-2	A4GALT1 and 2 from D. melanogaster and other unknown GT32 sequences	685	1	27	6	84	402	165	-	-
		GT32-3	A4GNT and A4GALT from human and mostly chordates homologs	746	-	-	-	6	737	-	-	3
		GT32-4	Mostly bacteria, protozoa and fungi GT32 sequences	4738	-	1547	129	2839	109	62	51	1
		GT32-5	Mostly bacteria GT32 sequences	2393	-	2365	-	6	6	-	8	8
GT34	GT34	GT34-1	All GT34 sequences	1198	-	1	5	83	3	1106	-	-
GT40	GT40	GT40-1	All GT40 sequences	167	-	-	167	-	-	-	-	-
GT43	GT43	GT43-B3GAT3	B3GAT3 homologs	1865	-	-	20	30	836	974	-	5
		GT43-Mix-1	Small subset of unknown GT43 sequences	79	-	-	-	-	75	4	-	-
		GT43-B3GAT2	Chordate homologs of B3GAT2	129	-	-	-	-	128	-	-	1
		GT43-Mix-2	Lower metazoan and plant GT43 sequences	125	-	-	-	-	122	3	-	-
		GT43-B3GAT1	B3GAT1 homologs	690	-	-	-	-	690	-	-	-
		GT43-Nematode	Nematode GT43 sequences	73	-	-	-	-	73	-	-	-
GT45	GT45	GT45-1	All GT45 sequences	410	6	395	6	-	-	1	-	2
GT49	GT49	GT49-B4GAT1like	B4GAT1 homologs	1353	-	1	183	50	1045	68	-	6
		GT49-Fungi	Fungi GT49 sequences of unknown function	298	-	-	-	298	-	-	-	-
		GT49-LARGE	Homologs of human LARGE1 and 2 GT49 domains	1111	-	-	5	-	1095	2	-	9
GT54	GT54	GT54-MGAT4C	MGAT4C homologs	1214	-	1	16	13	1176	5	-	3
		GT54-MGAT4AB	Closest homologs of MGAT4A and 4B	1313	-	-	-	-	1310	-	-	3
		GT54-Chordate	Chordate GT54 sequences	283	-	-	1	-	280	-	-	2
GT55	GT55	GT55-1	All GT55 sequences	179	72	66	-	39	-	-	-	2
GT60	GT60	GT60-1	All GT60 sequences	1125	-	616	469	3	-	26	11	-
GT62	GT62	GT62-1	Subgroup of GT62 sequences from all taxa	383	-	156	57	145	17	7	-	1
		GT62-2	Includes Mnn9p from S. cerevesiae and its close homologs	566	-	-	-	562	-	4	-	-
		GT62-3	Mostly fungal GT62 sequences	1201	-	-	-	1193	-	8	-	-
GT64	GT64	GT64-EXTLs	Exostatin like sequences	1502	-	2	50	239	1042	162	-	7
		GT64-EXTs	Metazoan Exostatin sequences	1637	-	-	-	-	1623	-	-	14
		GT64-Mix	Mix of GT64 sequence from diverse organisms, mostly plants	599	-	-	20	3	1	575	-	-
GT67	GT67	-	All GT67 sequences; Group with GT31 sequences in GT31-67-Mix	56	-	-	56	-	-	-	-	-
GT75	GT75	GT75-1	Prokaryote and plant GT75 sequences	112	7	64	1	-	-	39	-	1
		GT75-2	GT75 sequences from archaea, chlorophytes and plants	1154	230	20	-	-	1	901	-	2
		GT75-3	GT75 sequences from diverse taxonomic groups	475	-	151	21	10	110	183	-	-
GT77	GT77	GT77-1	GT77 sequences from mix taxa	1923	1	27	243	145	139	1366	2	-
		GT77-2	Mostly plant GT77 sequences	1402	-	-	1	1	2	1398	-	-
GT78	GT78	-	All GT78 sequences; No pattern based group	8	-	-	5	-	-	3	-	-
GT81	GT81	GT81-1	GT81 from Euryarchaeota and Cyanobacteria phyla	472	251	217	-	-	-	-	-	4
		GT81-2	GT81 sequences from archaea and bacteria	3299	30	3258	-	1	-	-	-	10
		GT81-3	Mostly proteobacteria GT81 sequences	1035	1	1032	-	-	-	-	-	2
GT82	GT82	GT82-1	All GT82 sequences	798	-	795	3	-	-	-	-	-
GT84	GT84	GT84-1	1st subgroup with a mix of GT84 sequences	7993	1	7927	-	49	8	2	-	6
		GT84-2	2nd subgroup with a mix of GT84 sequences	738	-	736	1	-	-	-	-	1
GT88	GT88	-	All GT88 sequences; No pattern based group	184	-	184	-	-	-	-	-	-
Mixed groups		GT2-Mix-1	Mix of sequences from multiple GT2 subfamilies, mostly prokaryotes	39143	898	38072	12	29	22	22	2	86
		GT2-Mix-2	Mix of mostly cellulose synthase like and CWR sequences. Also includes some GT84 and other GT2 sequences.	40778	832	33292	203	994	23	5290	73	71
		GT2-Mix-3	Mix of sequences from multiple GT2 subfamilies; mostly GT2-Class1 and GT2-RhamGlfT	69424	1434	67547	22	42	214	16	1	148
	GT2-CHS	GT2-Mix-4	Mix of sequences mostly from the GT2-Class1 subfamily; Also contains sequences from the GT2-CHS and GT2-LpsRelated sub families	117208	1620	115181	60	69	26	15	20	217
	GT2-Rham-GlfT	GT2-Mix-5	Majority are rhamnosyl and galactofuranosyl transferases from the GT2 family but also includes some sequences from GT2-Class1 sub family.	23498	382	22962	1	-	48	2	71	32
	GT31-Galt-Gnt	GT31-67_Mix	Mix of sequence homologs of B3GALTs, B3GNTs; and GT67	9546	-	21	579	29	7695	1190	2	30
		GT8-GAUT_GATL_Mix	Mix of GAUT and GATL like sequences	1877	-	-	6	4	563	1304	-	-
		GT8-Mix-1	Mix of GT8 sequences from GT8-Glycongenin, GT8-LpsGlt and GT8-GATL families	4367	1	782	219	618	50	2630	66	1
	GT8-LpsGlt	GT8-Mix-2	GT8 sequences involved in lipopolysaccharide biosynthesis	19773	26	19598	43	62	11	10	4	19
		GT8-Mix-3	Metazoan GT8 sequences	375	-	-	3	-	370	-	-	2
		GT2-DPs_81_Mix	Mix of GT2 dolichol phosphate mannose/glucose and GT81 sequences	1543	94	1442	-	-	-	4	-	3
