# Supplementary material for: Deep evolutionary analysis reveals the design principles of fold A glycosyltransferases
Source: eLife journal article supplement (doi:10.7554/elife.54532), 2020-04-01
Supplement: supp [file elife-54532-supp-v1.zip › elife_poa_e54532_Figure_3_source_data_3.txt]

>GT2-B3GntL|AAI11712.1|Chordata_Metazoa Rattus norvegicus;B3GNL;UDP-GlcNAc:betaGal beta-1,3-N-acetylglucosaminyltransferase-like protein 1 (BGnT-like protein 1) (Beta1,3-N-acetylglucosaminyltransferase-like protein 1) (Beta3Gn-T-like protein 1) (Beta3GnTL1) (EC 2.4.1.-)
IILPVHNAE-QWLDECLMSVLQQDFEGT-MELSVFNDASKDKSRAIIEKWKVKLEDSVVIGGHDRGVGYSKNQAIAQS---TGSYLCFLDSDDVMMPQRVRMQYEAAVQHPASIIGCQVRRDPDSTERYTRWINQLTSDQLLTQVF-TSHGPTVIMPTWFCSRAWFSHGPFDEGQGVPEDLLFFYEHLRKGGGVFRVDHSLLLYRYHLCA------ATHS----------V
>GT2-B3GntL|AAT47555.1|Chordata_Metazoa Homo sapiens;B3GNL;UDP-GlcNAc:betaGal beta-1,3-N-acetylglucosaminyltransferase-like protein 1 (BGnT-like protein 1) (Beta1,3-N-acetylglucosaminyltransferase-like protein 1) (Beta3Gn-T-like protein 1) (Beta3GnTL1) (EC 2.4.1.-) (Beta-1,3-N-acetylglucosaminyltransferase 8) (BGnT-8) (Beta-1,3-Gn-T8) (Beta3Gn-T8)
IILPVHNAE-PWLDECLRSVLQQDFEGT-MELSVFNDASKDKSGAIIEKWRVKLEDSVIIGGHDRGVGYAKNQAVAQS---SGSYLCFLDSDDVMMPQRVRLQHEAAVQHPSSIIGCRVRRDPNSTERYTRWINQLTPEQLLTQVF-TSNGPTVIMPTWFCSRAWFSHGPFNEGQGVPEDLLFFYEHLRKGGGVIRVDQSLLLYRHHPQA------ATHC----------V
>GT2-B3GntL|CAA95792.2|Nematoda_Metazoa Caenorhabditis elegans;-;Glyco_trans_2-like domain-containing protein
VIIPAKNVE-KFLRETLNGLLDQTANSK-IEICLADDGSVDDTVRILENARLEFEEMVVVTH--GGVGAAKDCAVRSS---KGRYLCFNDADDVSSPNRIKSQLELATKLSKSFVGGQFHRLPGSTTRYTKWANSMIGDKIRSQVY-TSHGPTLVAPTWFISRALFDKGGFTDSCGFPEDLEFFYKCLDFPECIFKVDDDIVMYRYHKNC------ASHS----------V
>GT2-B3GntL|CEG01105.1|Chlorophyta_Viridiplantae Ostreococcus tauri;-;Glycosyl transferase, family 2
IIVPVHNAA-RFLDETLSSVCAQTYRGP-VEVSIFDDGSTDESAKFIRRWREALERVVVVNGSRAGIGFCRNRCIQQS---SGSILVFLDADDVMMPNRLEVQVPLAMNNPRAIIGGCWKRYPGSTEHYEAWANMMTQKELHLEQF-RE--CTVLLPTWCMTRANFDEGGFVEGSGEAEDLIFFQRHLQLHYEQNELDKVPSMLR--------------------------
>GT2-B3GntL|EFA84093.1|Amoebozoa_Protista Polysphondylium pallidum;-;Glyco_trans_2-like domain-containing protein
ICLCMKNAS-LYIDETLLSVVLQSYRGP-IELSMFDDLSTDDTIEIAKKWIVLFKHYFVLNGGKRGCGYARNKAIQYS---HGDYLCILDSDDIMYRERIELQIKECLKYDNVIVGSNFLRIPGSSNRYTEWCNRLTNEELYLHQY-RE--CTIIQPTWFMRRDTCYRGGFSTKQPIPEDLIFFHKHLQLEGKLGKIKLEYLEKRVLNKW------SSFS----------I
>GT2-B3GntL|KFP15026.1|Chordata_Metazoa Egretta garzetta;-;UDP-GlcNAc:betaGal beta-1,3-N-acetylglucosaminyltransferase-like 1 (Fragment)
VIVPVHNSE-CWLDECLKSVWEQDFKDT-MELSVFNDASKDGSAEIIEKWKIKLEDAVIIGSNDRGVGFAKNQAVIQS---SGTYLCFLDSDDVMMPQRVRLQHEAAIQHPNSIIGCQVRREPESTERYTRWINNLTEEQLLTQVF-TSHGPTVIMPTWFCSREWFFHGKFDEGKGVPEDLLFFYKHLQKGGEVFRVNHCLLLYRYHPQA------ATHS----------V
>GT2-B3GntL|WP_036532617.1|Cyanobacteria_Bacteria Neosynechococcus sphagnicola;-;tetratricopeptide repeat protein
VIIPIYKNY-VITKICIESVLNSKNETP-LNLVAINDESPD---PEIWLYLEDLANQQLLINHSKGFVHSVNRGMSLS---NDRDVVLLNSDAIVVDDRLRSNHASIFSYPR--MAEEVEQMPEIDAQEIDNICTLVNKDFLVDVP-TNHGFCC-----FLRRETLTQGLFDEEKGYGEEVDWSQRSLRLGWRHVAVPGIFI---HHVGS------QSFS-----------
>GT2-B3GntL|XP_007512589.1|Chlorophyta_Viridiplantae Bathycoccus prasinos;-;Unnamed protein product
IIMPVHNAE-KWLDESVSSILTQSYDGP-LEVSFFNDASTDGSFQKMREWMLALRYAVKITEKSGGIGFAKNRSVEYS---QGSILVFFDADDIMANDRVKMQVQHTIESPSSIIGTTWKRFPGSTAHYEQWANRLSNEEMILEQF-REN--TVQMPTWAMARKCFDDGGFEEDSGEAEDTIFFHKHLRGKFPILRAEEPLLYYRWTETS------GTSR----------V
>GT2-B3GntL|XP_009829183.1|Stramenopiles_Protista Aphanomyces astaci;-;Glyco_trans_2-like domain-containing protein
-VVPAHNAS-STIDDCLASICNITYR-P-LEVAVYDDASTDDTFDKLQAWVPKCAAALHAIEKKGGAGYAKNRAAEVC---TGAYFAFLDSDDMALPHRVDVQLAMAKNDPSVIVGANFTRIPGSTWHYTAWANALTDEQLVLQQY-RE--CTIIMPTWFMAKARFEFGGFDESATIPEDLIFFLKHLELGGTLKKSNDTLVIYRHSSG----------------------
>GT2-B3GntL|XP_011416544.1|Mollusca_Metazoa Crassostrea gigas;-;PREDICTED: UDP-GlcNAc:betaGal beta-1,3-N-acetylglucosaminyltransferase-like protein 1
IIIPVYNGD-KWIDDCLRSVETQNFNGK-LEVSIFNDGSTDGTISKLEEWRETLREKVTLGGHTRGVGYAKNQAVEQS---SGVYLCFQDIDDVMSPDRVSKQYQAARSEQNSIIGSKFHREPGSTERFTKWANTLSQDQLYSQIY-TSHGPTLIMPTWFCHRSVYNKGGFSEGKGVPEDLIFFLRHLELGGGLCRVDADLLMYRYHPGA------TTFS----------I
>GT2-B3GntL|XP_011680845.1|Echinodermata_Metazoa Strongylocentrotus purpuratus;-;PREDICTED: UDP-GlcNAc:betaGal beta-1,3-N-acetylglucosaminyltransferase-like protein 1 isoform X2
IIMPVHNGE-PWLVECLESVLAQKFSGS-IQLSVYNDASNDKSATILEGFRSKMEKACMLINGHVGVGAARNRAIEAS---SGQCLCFLDADDVMDSRRIEMQYAAAVTRPNAIVGCQFRRRPDSTPRFTDWCNRLKREQLYTQAY-TSHGPTVAMPTWFCSREVYENGKFDEGKGTPEDLIFFKAHLEGGGKLYRVDEVLMMYRYHPGA------TTHS----------I
>GT2-LpsRelated|ABD81480.1|Proteobacteria_Bacteria Saccharophagus degradans;-;B-glycosyltransferase-like protein
VIIPILNER-AKLPNLCEALSQLTVAA--VEFLFVDGGSEDGSVVWLKQNN----FTVITAQ--KGRAYQMNAGAKLA---QGEWLIFLHADTSMPATFFTALA--AQPSHVAWGHARVKLDDERGIAFRTAISG------------VATGDQTFVRRNIFNAMG---GYE--PILLMEDVALSCKLNRYYDKAIL--PV--EV------------VTSSRKWRKNGYIKS
>GT2-LpsRelated|WP_006652420.1|Euryarchaeota_Archaea Natrialba hulunbeirensis JCM 10989;-;Family 2 glycosyl transferase
IVIPARNEA-AYLRGALSSITALDTYE--YEVIVVDGASTDGTRAIAREYG----ATVLEEG--SSIAVARNLGASRA---DGEWLAFIDADTRVRADYLTEMLGFVEREGLAAASSRCRMTGEATINELFPRLA------------SPVGFNC-VHHRAFGEVG---GFP--DVP-NEDTAFSRRLGRQYPTAYH--PD--VV------------ASSGRRIAADGLTG-
>GT2-LpsRelated|XP_002295902.1|Stramenopiles_Protista Thalassiosira pseudonana;-;Predicted protein
-IIPAFHEK-GELSNALRSARG--PHE--IEVIVVDAGGCSDLDLLLSTSSDDGHIVEFQSG--GGRGPCLNYGASSS---TGRVLTFCHSDATLPRYWDDSIVSTLEHDGARKGAFAFGIDTETTANIRTHLYS------------LPYGDQVSLHACVFHFLG---GFP--DQCLMEDYELVSLLRRRSALIIL--GP--PA------------LCSPRRWQKFGVLF-
>GT2-LpsRelated|XP_002594097.1|Chordata_Metazoa Branchiostoma floridae;-;Glyco_trans_2-like domain-containing protein
VIIPVLNEA-KNVKSAIDSAMQSTSSH--TEVVVCDGGSTDGTPDVVKSGT----VKFVSSP--KGRGVQMNTGVQHA---TGDYLLFLHADTCLPSSWQRVAFRTLCKPGVSMGAFRFGLSSVWNANLKSTQFE------------LPYGDQAFMTTRQFLEVG---GFP--EFLLLEDVKMVALMKRHGHVAIAE-GD--PA------------LTSDRKWRQHGYFQ-
>GT2-LpsRelated|XP_003069188.1|Ascomycota_Fungi Coccidioides posadasii;-;Uncharacterized protein
IVIPSLDESLQTISRLFDTFVLKNEGR--KEVVVVHAGRDTSNEIPVQTLH----VRRYTAP--PSRGAQQNYGATYV---AAAVYLFLHADTLLPQGWDAAILSTLSSPKPPAATFSLSLPPLWGANLRARRGG------------WPYGDQAFLTRQTFDAVG---GFP--NVPIMEDVELLRRIRTRGTVRVL--PI--AV------------QTSPRRWKQKGVLRS
>GT2-LpsRelated|XP_003081765.1|Chlorophyta_Viridiplantae Ostreococcus tauri;-;Glycosyl transferase, family 2
IVIPARNES-RAIGPTLRLLRALEPEA--CEVIVSVGDSSDDTATIAREHG----AVVVNGK--KGRACQMNAGAKAA---SGDYVLFLHADTTVPLDVVDVIRRQLRDEKTVIGGFVSLIETSWRPFAYLRGFR------------ILFGDQAFCRRDDFDRVG---GFD--ELPIMEDADLCVRMHHRGRIKLL--DR--VV------------TTSGRRIERLGNVK-
>GT2-LpsRelated|XP_005708341.1|Rhodophyta_Protista Galdieria sulphuraria;-;Glycosyl transferase, group 2 family protein
VIVAALNEA-ANISQVLQSVINEAKDP--CEVVLVDAGSRDNTVDLAKKMASKSKIRIISSPE-RGRAFQFNWGVRAA---SSNVFLFLHGDTILPKHYDETVRDTLLKPNTVAGAFSLGFRNAFFANVRSKLFQ------------LPFGDQGFLFSTKFHKLG---GFP--RQLFMEDVEIISRLKRQGRIRIA--PV--KV------------WTDARRWNSVGIWK-
>GT2-LpsRelated|XP_013390833.1|Brachiopoda_Metazoa Lingula unguis;-;uncharacterized protein LOC106159171 isoform X1
VVIPTLNEA-RTIGSCIQRLLEQCSDT--NEIIIADGGSKDDTLTLIEQLP----IIAINCD--KGRGVQLNAGAKAA---TGDIVLFLHADTKLPDDFHVSILSCLNTPGNVAGAFPFYFSDKWGARQRNIKME------------LPYGDQGFLRRQILEKIG---GVP--ETLLFEDFILVEKLKQIGHVAIT--DSE-PA------------RTSARRWEENGVIK-
>GT2-Class1|AKB15915.1|Euryarchaeota_Archaea Methanosarcina thermophila CHTI-55;-;Mycofactocin system glycosyltransferase
IVVGIRNEE-KFIEECIESLLNLDYPRDSYEIIIVDGMSTDKTRDIVRRYP-----VLLLNER-KNVAAARNLGVKNA---KGELVAFTDGDCKVDPQWLKTLVHEMQEADVVCVGGPNLIF-DTDPFGRVVGYAQESFLGSGGSAQYVSSNCNMYKKSAIQEVG---GFDE-RFVVGQDGDLNYRINKKGYRFLY-IPEARVL--HHRRGTLKSFSIRMFKYGMWMAELF
>GT7|BAD02449.1|Chordata_Metazoa Homo sapiens;B4GN3;Beta-1,4-N-acetylgalactosaminyltransferase 3 (B4GalNAcT3) (Beta4GalNAc-T3) (Beta4GalNAcT3) (EC 2.4.1.244) (Beta-1,4-N-acetylgalactosaminyltransferase III) (N-acetyl-beta-glucosaminyl-glycoprotein 4-beta-N-acetylgalactosaminyltransferase 2) (NGalNAc-T2)
-VVPVKNQA-RWVQQFIKDMENQVTGDPHFNIVITDYSSEDMDVEMALKRSKSYQYVLSGNFE-R--SAGLQAGIDLV---KHSIIFLCDLHIHFP-------------------AGVIDAI-RKHCVEGKMAFAPMVMRLHCGA--YWEVNGFLLYKSDLDRIG---GMNT-KEFRGEDWELLDRILQAGLDV--------------ERLSLRNFFHHFHKRGMWSRRQ-
>GT7|BAD06471.1|Chordata_Metazoa Homo sapiens;B4GN4;N-acetyl-beta-glucosaminyl-glycoprotein 4-beta-N-acetylgalactosaminyltransferase 1 (NGalNAc-T1) (EC 2.4.1.244) (Beta-1,4-N-acetylgalactosaminyltransferase IV) (Beta4GalNAc-T4) (Beta4GalNAcT4)
-IVPVKNQA-RWVAQFLADMLHARTGDSRFSVVLVDFESEDMDVERALR-AARLPRYYLRRTG-NFRSAGLQAGVDED---ASSIVFLCDLHIHFPPN-------------------ILDGI-RKHCVEGRLAFAPVVMRLSCGSSPYWEVNGFLFYKSDFDRVG---GMNT-EEFRGEDWELLDRVLQAGLEV-------------------------------------
>GT2-Class1|KAJ49428.1|Firmicutes_Bacteria Clostridium tetanomorphum DSM 665;-;Succinoglycan biosynthesis protein exoA
IVIPCRNEE-SYIKKCLDSFINQTYPKELYEVLVCDGMSIDSTREIVKEYEEDYDNILIDNEG-LSAPKGMNKGIKYS---KADVIIIFGAHAYAKEDFIEENIKTLIANDVGCVGGPIETI-NEDDKGLAISMAMSSPFGVGNALFYVDTVAFCYRKSVLDKVG---YFDE-ELVRNQDDELNFRVVKNGYNILL-SPKIRSY--YYSRSSLKKLWKQYYQYGFWKVRVL
>GT2-Class1|KII67805.1|Cnidaria_Metazoa Thelohanellus kitauei;-;O antigen biosynthesis rhamnosyltransferase RfbN
IAIPTYNGG-E-IWQTAASEIKKHAPLNTV-VQVIDSSSSDNTVSVA---ISNGFNVTIPGNE-FNHGGTRNLAVKDF---DYDVVIFLTQDAIPQPNFVENILSAFENEDVVCAYG-RQLP-HTDANPLAIHARSFSYPEKGYIADFFMSNSFAYRLSAFKELK---GFPE-NTILCEDMFFTAKSVLAGFKVAY-VSDAIVK--HSHNYTPIEEFKRYFDIG-------
>GT2-Class1|WP_015791079.1|Euryarchaeota_Archaea Methanocaldococcus fervens;-;Glycosyl transferase family 2
IVVATYNRK-DKLKKCLNALENQTYPKEDYEIIIVDDGSTDGTYEFLKEKQKEIKNLIFRQNN-KGPAAARNLGVKNA---KGEVIFFTDDDVIVPNNWIEEFLKVFEKPEVVAVGGYIEAI-KKNIFAKYEAYMSRLVYNMPNGPYVV--TCNAYKKKVIEEVG---YFDE-TFAAGEDADLKLRVALKGYKFAF-IP-LKAI--HIQDYNFKRFWRQQVARGIGNVYF-
>GT2-Class1|XP_001777329.1|Streptophyta_Viridiplantae Physcomitrella patens subsp. patens;-;Predicted protein
VVAPIYQQR-KEVLELISSLANQTYKVEQ--VILVDDCSSSATGQNEENLVKLPAHTLVRRPK-NHGPAGLGLAIAEH---QAQIVNFIDSDCEAESHWVEAMVAALKKKTAASDGAILSGL-TYGYGNTFVDKFHDHFGTLNGRIKLYAPSCNSIRISMITQVG---GFDE-SFPKAEDVDFCMRATQCGILTQC-VPNAKIW--HKYQTSIPQLFRMFQRYGASEWAV-
>GT2-Class1|XP_005792563.1|Haptophyceae_Protista Emiliania huxleyi;-;Glyco_trans_2-like domain-containing protein
-----------HESALYRCFAAQTHPHT--ELVVVDTGPTPS------AFFSSAERVYIHQVG-HTIGEKRNVAIAAA---SGDFICHFDDDDLYAPSYLATMLAALDDAGADFV----------KLSAWFVHDLQTGATGEAGMPHFLYTGFSLYRRKLFPAFS---FAAT-SW--GEDQDILKRVRGGGRRVAL-----------------------------------
>GT2-Class1|XP_007392100.1|Basidiomycota_Fungi Phanerochaete carnosa;-;Glycosyltransferase family 2 protein
VIIPCYRVM-LYLDVFLA--LQASPTCSVMFIIIVDDPNSPNIRELKAKYEHRDVRII--NKK-NLASASRNRGLSES---AAEWVLFLDDDVTPEQDILVQLEKCIRAHPNAAVGNAKFPL-ARTIFTTAVHLAGVTYFWDIASK-WGVTANLA-RRDVLDGV----VYDV-TFPKGEDIDYEYSVSHGGTGFVA-APNVTVT--HYWNSGDRSYWR-FYMWAKGDGAL-
>GT2-Class1|XP_011366188.1|Chordata_Metazoa Pteropus vampyrus;-;PREDICTED: beta-1,4-N-acetylgalactosaminyltransferase 3
-IVPVKNQA-RWVQQFIRDMEKQVTGDPHFNIIITDYSSEDMDVEMALKRSKLYQYMLSGNFE-R--SAGLQAGIDLV---KHSIVFLCDLHIHFPA-------------------GVIDAI-RKHCVEGKMAFAPMVMRLHCGA--YWEVNGFLLYKSDLDRVG---GMNT-KEFRGEDWELLDRILQAGLEV--------------ERLSLRNFFHHFHKRGMWNRRQ-
>GT7|AAF58819.1|Arthropoda_Metazoa Drosophila melanogaster;-;Hexosyltransferase (EC 2.4.1.-)
----------------------------------------------------------------FSRAKALRLGIQPA---EEDVLLFMDVDIMFTTKFLERCRW-NAAPGFSLYNPHVVYSLPSEEEQ------------------LVISRDTGFWRSNFLKVR---GFDEEVGWGGEDVMLYRKYVRSKIKIIR-ATDPGI--FHR----------------------W
>GT7|AAH30268.1|Chordata_Metazoa Homo sapiens;CGAT2;Chondroitin sulfate N-acetylgalactosaminyltransferase 2 (EC 2.4.1.174) (Chondroitin beta-1,4-N-acetylgalactosaminyltransferase 2) (Beta4GalNAcT-2) (GalNAcT-2)
----------------------------------------------------------------FNRGRGLNVGARAD---KGEVLMFFDVDIYFSAEFLNSCRL-NAEPGKKVFYPVVEVP-PPVEQQ------------------LVHKKDSGFWRSDFLTIG---GFDMEKGWGGEDVHL-YRKYLHGIVIRT-PVPG--L-FHL----------------------W
>GT7|AAO85274.1|Nematoda_Metazoa Caenorhabditis elegans;CHSSA;Chondroitin sulfate synthase sqv-5 (EC 2.4.1.174) (EC 2.4.1.175) (EC 2.4.1.226) (Glucuronosyl-N-acetylgalactosaminyl-proteoglycan 4-beta-N- acetylgalactosaminyltransferase 1) (Glucuronylgalactosylproteoglycan 4-beta-N- acetylgalactosaminyltransferase) (N-acetylgalactosaminyl-proteoglycan 3-beta-glucuronosyltransferase 1) (Squashed vulva protein 5)
-----------------------------------------ENRETIEMLRASF-IPIEMGDVSFSRGVALMRGAETL---PANALLFTDVDML----FTCDALK-RIKSNTILNANDKLLA-DAFHYG------------------RGRGGLAAMYKADLMDVG---GFDTKEGWGKEDVDLFEKAIKNG----------------------------------------
>GT7|AAO85275.1|Arthropoda_Metazoa Drosophila melanogaster;-;Hexosyltransferase (EC 2.4.1.-)
--------------------------------------------ELGDHLQLLHDLHVYQQVNWIQRSSAFSRGVAAA---RSSYILFIDVDMVFEVETLQRVRM-HTQR-----GKQVYLP-IVFSQYDPQRRSGDAGGSEDEGETGFGIC--AIYKSDILDIN---GFDKDTGWGLEDVKFLEKIVRVG--TRQ-RGFLA-----------------------------
>GT2-CHS|AEK09193.1|Caudovirales_Virus Mycobacterium virus Ibhubesi;-;Glycosyl transferase
--VTTRNRN-TIADETIAKIRRHT-PN--AKLVIVDDASDEPYPAATYRFTQRAGI-----------ARAKNKCLELL---NGEHIFLFDDDCYPIADWFQPYID-SPEPHLMLAGGRKLND-VTKVYDDGRHFALT----------GARGCMIYVHRSVIETVG---GLDPEGGWGWEHPSWSDRIYNAGLTTFR-YG--------------------------------
>GT7|BAB85992.1|Chordata_Metazoa Homo sapiens;CGAT1;Chondroitin sulfate N-acetylgalactosaminyltransferase 1 (CsGalNAcT-1) (EC 2.4.1.174) (Chondroitin beta-1,4-N-acetylgalactosaminyltransferase 1) (Beta4GalNAcT-1)
------------------------------------------------------------------------------------------------------------------------------------------------------------YRSDFINIG---GFDLDKGWGGEDVHL-YRLHSNLIVVRT-PVRG--L-FHL----------------------W
>GT7|BAC98832.1|Chordata_Metazoa Homo sapiens;CHSS3;Chondroitin sulfate synthase 3 (EC 2.4.1.175) (EC 2.4.1.226) (Carbohydrate synthase 2) (Chondroitin glucuronyltransferase 3) (Chondroitin synthase 2) (ChSy-2) (Glucuronosyl-N-acetylgalactosaminyl-proteoglycan 4-beta-N-acetylgalactosaminyltransferase II) (N-acetylgalactosaminyl-proteoglycan 3-beta-glucuronosyltransferase 3) (N-acetylgalactosaminyltransferase 3)
------------------------------------DSSKH--IELIKGYQNKYPIPEFSRGLG------LEMASAQF---DNDLLLFCDVDLIFREDFLQRCRD-NT-----IQGQQVYYP-IIFSQY------------------DTNGGNTGFWKSDLLGAG---GFDTSQGWGLEDVDLYNKVILSGLRPFR-SQEVGVVHFH------------------------
>GT2-CHS|ELT95299.1|Annelida_Metazoa Capitella teleta;-;Glyco_tranf_2_2 domain-containing protein
VIIPFRERP-GDLDSVIACFAGLSNI----EVVVFDTGRHSTRLKLTNSQQENLRF-QFQPGV-FAPGRVRNAAVAHA---TGRYIFLFDADLLISRKFVRA-LE-SEGPQAFRMFPCLYLS-QRYSAR------------------FASSC-LLIKRAWFMAIG---GFRHEAGHGYEDFDLIHRL--------------------------------------------
>GT2-CHS|ETE69759.1|Chordata_Metazoa Ophiophagus hannah;-;Hexosyltransferase (EC 2.4.1.-) (Fragment)
-------------------------------ILFSPDSSQESSKELISAYRNKYPMAVVPMAGAF----SRGLGLETA---SSQFLLFCDVDLIFTPDFLQRCRA-NT-----IQGKQVYYP-IIFSQYDPKVTYGDHPPVDSYFVFFWRDYGFGIYKSDLINAG---GFDTSQGWGLEDVDLFTKVVTSGLKAFR-SQEVGVV-FH------------------------
>GT2-CHS|WP_005384788.1|Proteobacteria_Bacteria Vibrio alginolyticus 40B;-;Uncharacterized protein
LIITTYNWK-EALKAVLESVKRQTVLP--DEVIVADDGSREDTKAMVDQMREGFPVPSWHEDNGFQLSMSRNRAIAKA---SGDYLIMIDGDMVLSQTFIESHKQ-VAKPNWFVQGGRVLTD-ENCSDK------------------ATRGCNMAFWRQDVIEVN---GFNQDVGWGREDSEFVHRMLNAGKSRLY-LKFAGVG-YHL----------------------Y
>GT2-CHS|WP_008385681.1|Euryarchaeota_Archaea Halogeometricum pallidum JCM 14848;-;Glycosyltransferase
VIVVTYRTPVEVFEPVLEALDDQTASD--YEIVVVANDTDANVESSVTESEH-----LFVEDRNYGVTVGRNLGAKLA---RGDLLLFLDDDGVPERDFVAAHRRAHAEHDIVAARGRVLPK-RDTVYT------------------RIQSHNTSFDRETYLDAG---GYDENARAGHEGIELTHRLVQDGIRRDQ-IIYDAVI-YHD----------------------Y
>GT2-CHS|XP_001761925.1|Streptophyta_Viridiplantae Physcomitrella patens subsp. patens;-;Predicted protein
VIIPTYNRL-PILRKCLQALEEQEIED--YEVVVVDDGSTDGTLEVLNENLSSSPIPIRQHHGG--ATRARNLGVRTA---RGAIIVFIDSDLVVTKDFLREHAE-HGDDNTFTYGRVVNTANTDNSAA------------------FFATGNVALSRKLLLKAG---NFDADSEYGWEDLELGVRLKQVGARIKH-V-PLAVG-YH------------------------
>GT2-CHS|XP_005716405.1|Rhodophyta_Protista Chondrus crispus;-;Glyco_transf_7C domain-containing protein
------NQK-KSLTVALPAWEAVKEID---EIVLVDWGSTSDQWDDIPLLDTLIRTRIRIPDAGWVLSRAYNLAARFV---TSKHILRVDCDTYVNPHFVENHPR-PGRREFYTIASGTERN-EN--DR------------------KLQG--VWFARTDFLKVG---GYDERTEYGYEDLDLYDRFHRKGINLDM-LKHSIIG-HLL----------------------W
>GT2-DPs|AKB14237.1|Euryarchaeota_Archaea Methanosarcina thermophila;-;Glycosyltransferase
IIIPVYNEE-ENILELLCCVLSVLDKR--YEIIFVDDGSTDNTFETIKSI--QDSNIRILRFQRYGKAAALSCGFNKS---RGEYVITMDGDLQDDPKEIPRFLEKLKE--FDMVSGWKVKR-QDPLSKTLPSKCFNKLTRFITGVKDFNCGYKGYRREVVKNIN----L---YGEFHRYIPALAHW--KG---------------------------------------Y
>GT2-DPs|EJW18345.1|Firmicutes_Bacteria Paenibacillus alvei;-;Putative family 2 glycosyltransferase WsfH
IVVPMYNEE-ENIEYFITNVLESNNYQ--YEIVCVNDGSKDQTLSRISEIAEKDKRIKVIDLSRFGKEIAMTAGLRYS---TGDAVIPIDADLQDPPELIPQLIEKWQEG-YDVVYATRARR-EETFVKKATAHLFYRFIQKITRINADTGDFRLMSRQVVDALN----Q---LPEQHRFMKGLFSW--VG---------------------------------------F
>GT2-DPs|KGQ13187.1|Ascomycota_Fungi Beauveria bassiana D1-5;-;Bifunctional polymyxin resistance protein ArnA
VVIPVYNEQ-DSLPELTTEACQKLNRD--YEILLIDDGSSDDSAAMLTRAAEADSHIVAVLLNRYGQHSAIMAGFSHV---TGDLIVTLDADLQNPPEEIPRLVEKADEG-YDVVGTVRQNR-QDSWFRKRASKMINHLIQRTTGKADYGCMLRAYRRHIIDAML----H---CHERSTFIPILA----------------------------------------------
>GT2-DPs|NP_720276.1|Caudovirales_Virus Salmonella phage ST64T;-;GtrB
LVVPVFNEE-DTIPIFVREFNELKEYE--IEIVFINDGSKDATESIINKIAASDPLVIPLSFTRFGKEPALFAGLDHA---TGDAVIPIDVDLQDPIEVIPHLIEKWQAG-ADMVLAKRSDR-SDGRLKRKTAEWFYKLHNKISNPKENVGDFRLMSRAVVENIK----Q---MPERNLFMKGVLSW--VG----------------------------------------
>GT2-DPs|XP_001761573.1|Streptophyta_Viridiplantae Physcomitrella patens subsp. patens;-;Predicted protein
VIIPVYNEI-AAIGTLVGDVMQKRGGP--YEVVCVDDGSTDGTARILKQMAAEREDMRVVIFRRFGQTAAMAAGFDFA---AGDVFVTMDGDLQNDAEDIPKLVDREDGG-YDLVCGWRRKR-KDNFTRNFPSWVANMLIGALTGVRDYGCSLKAYRAPLLSTLL----L---YGEMHRFIPTLAAM--EG----------------------------------------
>GT2-DPs|XP_005709212.1|Rhodophyta_Protista Galdieria sulphuraria;-;Dolichol-phosphate mannosyltransferase (EC 2.4.1.83)
VVVPFYNEA-DSIEKLVIAACEESPYQ--WELICVDDGSTDGTTDKLKRLCDKYPTIKGISFRKFGQTAALAAGFDIA---SGDLVATLDGDLQNDPKDIFRLIETMDAGDYDLVSGWRHCR-EDAFVRSKLSKAANWLIRWVTGVPDLGCATKVYKREVIRDIQ----L---YGEMHRFIVVLAMY--EG----------------------------------------
>GT2-DPs|XP_011567304.1|Arthropoda_Metazoa Plutella xylostella;-;PREDICTED: probable dolichol-phosphate mannosyltransferase
LVVPVFNEE-EAIPIFVREFEGLKQQE--VEIVFINDGSKDATESIINALAIADPLVVPLSFTRFGKEPALFAGLDHA---TGEAIIPIDVDLQDPIEVIPHLIEKWQAG-ADMVLAKRSDR-SDSRLKRKSAEWFYKLHNKISNPQENVGDFRLMSREVVENIK----L---MPERNLFMKGVLSW--V-----------------------------------------
>GT2-CWR|AFU60189.1|Thaumarchaeota_Archaea Nitrososphaera gargensis;-;Putative glycosyl transferase, family 2
-LVPTHNES-LVIRRLIRSICGLIYPKSRFEVIIIDDSEDDTTDTAAKLPNLKTIRR--KNR--NGKGGALNLALDHL-DTAY--VLVIDADNVLAPDTIEQFIIRFSQA-RQAIQGFISTS-NPISNWVARGIDFRLAQRNAIEFLQITGSLFMIRTDILKATR---F----STDLCEDWE------------------------------------------------L
>GT2-CWR|WP_015957965.1|Firmicutes_Bacteria Clostridium botulinum;-;Glycosyl transferase, group 2 family protein (EC 2.4.1.-)
-IVAAHNEE-LVIGNIIESLKMMDYDKKLYDIFVIADNCTDKTAEIAREKGAIVRERFDKKR--RGKGYALEWMFNIIFKMKYDAIAVFDADNLVHKNFLKEMNKKMCKG-YKVVQGYLDSK-NPEDTWITGSYSIAFWSCNRMFQLQLGGTGFCIDTDILKELG---WG---ATCLTEDLE------------------------------------------------F
>GT2-CWR|XP_002960031.1|Chlorophyta_Viridiplantae Volvox carteri f. nagariensis;-;Glyco_trans_2-like domain-containing protein (Fragment)
VLVPAHNES-AGITETLHSLNNQT--HRPDRVIVVADNCTDDTEELALAQGAEVI-RTVGNK--DKKAGALNFALSQLLPDPEDLVLVQDADSQLALDFIENATKNLLAD-E-----LLGAV-GGVFSGGPGGGFVGHLQRNEYARYVVTGTAALFRVKTLRDV-------------------------------------------------------------------
>GT2-Rham-GlfT|ACP35070.1|Crenarchaeota_Archaea Sulfolobus islandicus;-;Glycosyl transferase family 2
-VVLNYNGL-ELLKKYLTSVLETRYPY--KEVVVVDNGSNDGSKEYVKSLG----VRSLDKN--YGPAYARNVALKTF---KNKFIAFLDNDVWTPPDWLDPLVETITSDDKIAAVQSLYWP-YGEQPRLIPWF-------------STASA--LVRREEILKVG---GFDEHYFFYWEDTELSWRLYRAGYKILM-VPKSKVH--H----KKLPSPFTSYLTLRNQML-L
>GT2-Rham-GlfT|AEJ93287.1|Caudovirales_Virus Mycobacterium phage ShiLan;-;Polypeptide N-acetylgalactosaminyltransferase
--VTTRNRH-TIADRTIEHIRSRT-PN--AKLVIVDDAS-----------DQPYPAARFPQR--AGIARAKNKCLELL--NGCEHIFLFDDDCYPEPHLMYQFVDLANGHRLNDVT-KVYDH-HF----------------------ALTGI--YVHRSVIETVG---GLDPEFGGWWSDRIYNAGLTTFRYGDV--CGSNKLI--HSMTERNADLYWQHHY---------
>GT2-Rham-GlfT|EEF25587.1|Streptophyta_Viridiplantae Ricinus communis;-;Glyco_trans_2-like domain-containing protein
VVLLNWNGY-RDTIECLESLLPILSDF--DGVILCDNASSDGSVEWVKSSFPARRVYRNGAN--LGFAGGNNVGLRLALRDECRYAWLLNNDTTVDARSLPAAVARMEQDPDLGICGLVYFH-QG----------------------AFVGM--LVSRAFLEQIG---LMREDYFLYCEELDWAIRGAGRFRLGY--APQSVVW--HKEGA-NGGSPVSVFYLFRNRVR-V
>GT2-Rham-GlfT|KIM37632.1|Basidiomycota_Fungi Hebeloma cylindrosporum h7;-;Glycosyltransferase family 2 protein
-VIIPCYRV-DLLLDVVLSLRSPTCDV--MFIIIVDNPCSPSLAELISKHSHRPDVRTNNSN--LGASASRNRGLE---ESSADWVHFLDDDVVPRFDLLAEEIIRAHPNAAGFVGNSVFFK-DD----------------------VPWGVTALIARRKNDGIG---YPKTG---GGEDIDYCRRKRKEGFFVA--APEVLVT--HP-----------------------
>GT2-Rham-GlfT|WP_015153350.1|Cyanobacteria_Bacteria Chroococcidiopsis thermalis;-;Glycosyl transferase family 2
VVVVTYNRK-KLLIECLDAILTGTRLP--DKIILVDNGSTDDTPDFLKAEGYLANIDRLPEN--TGGAGGFYQGVKYGYEAGYDWLWLMDDDAEPEIDALEKLSHYLDEPDVSALANLKIDL-EGEILHPHLGFFDRQTHQNDFDFDSFVGI--LVSKRAIEKIG---FPNKEFFIRGDDLEYCLRLNNAGKILL--ITDSVIL--HKEAGTKYNRIWLTYFETRNAIW-L
>GT2-Rham-GlfT|WP_033518711.1|Actinobacteria_Bacteria Bifidobacterium scardovii;-;Glycosyl transferase
-VVVTYKRQ-QLLTKLFDSIRRLTVAP--WRVVVVDNEHSDETKAMVERFGNDARVVPQSGN--LGGAGGFSAGVKKAYELGAEWFWVMDDDVAVEPEGIEKLAKWTARHD--VIQGSRYDY-DGGPFYWQYDFIVPLGIPNPIAPACFEGG--LFRRSVVEKIG---FPDPRFFIYWDDTIYGYLASKVTNPIV--VPDVVLR--RTREILNSTSDTNRYHIMRNRGY-M
>GT2-Rham-GlfT|XP_005759089.1|Haptophyceae_Protista Emiliania huxleyi;-;Glyco_trans_2-like domain-containing protein
-------------------------------IIVVDNPSAPNLNEILKLQSERVRVR-NPEN--VGASSSRSRGLAEAC---AEWVLFFDDDVEVTQACLAYALAAADAKYSGFVGSTILPP---------------------------VAN--LLH----EATR---LSDITFFYWGDDLEFTVYAKTGGGEDV--DYCVELV--HALKLAKVIHDW-------------
>GT2-CWR|AAN10543.1|Arthropoda_Metazoa Drosophila melanogaster;GLT25;Glycosyltransferase 25 family member (EC 2.-.-.-)
VLIAVRNKA-HILPMFLSYLEQQDYPKERIAIWLRCDHSNDDSIELFKPEEQSF-VNGTSPYEWSRFKHLIALKEEAF---QYDYVFFLDAD-------------------------------------------------------------------------------------------------------------------------------------------
>GT2-CWR|WP_011821646.1|Crenarchaeota_Archaea Hyperthermus butylicus;-;glycosyltransferase family 2 protein
VIVVVRNNR-EGLRKLLDAL-KGYVERYKLELIVVDDASTANVVEIQHPTAAHVRYVRIDSTPRLPKSYALWVGANIA---RGDILFFLDSDVLINTGCILSVVQRVLCNPNSIVSFVPLFN-CGKSLCIGFETVVTAIIQGL-AGHI-YGCCWAIRRQLYAELG---GHRVVQRVTE-DVAFASLAAAKNVELKIFAREM-VA--VDAVKSVRDYF--------------
>GT2-CWR|WP_012022329.1|Bacteroidetes_Bacteria Flavobacterium johnsoniae;-;Glycosyltransferase, catalytic subunit of cellulose synthase and poly-beta-1,6-N-acetylglucosamine synthase
VIVCAKNEE-ENVKKFVPLLAEQNYPD--FEIVLIDDASSDETLEVEFEQKPNIRLVKVENNEAGNKKYALTLGIKAA---KKEYLLFTDADCYPTSKDWITSMTSQFTESKTIVLGYGGYE-KERSFLNKIIRFETVLTAVQYFSWMGVGRNLAYKKEEFFNVN---GFIDHQVRSGDDDLFINQAANK-SNTTISNPESFTY--SNPKESFKDWFTQKRRHIS------
>GT2-CWR|WP_018616219.1|Bacteroidetes_Bacteria Segetibacter koreensis;-;glycosyltransferase
VIIPARNEE-EHIGACLEMVLTQNYPPHLFEVIVADDYSTDNTAGITIQQQSNLHLIQLEKQKQSYKKKAIELAIEQA---KGEWIVTTDADCTVTKEWLMNFDNFIQKNKSVFVAAPVTFT-NTGSFVSIFQCLDFMSLQGITAASMCNGANLAYNKKVFYEVG---GFKGINIASGDDMLLMHKIYVRYKKVHFLSSKSIVA--TEPMETWEKFFNQRIRWAS-----K
>GT2-CWR|XP_006683551.1|Chytridiomycota_Fungi Batrachochytrium dendrobatidis;-;Glyco_trans_2-like domain-containing protein
---------------------ALSY--KNFEVIYINDGSTDDTFRLFLKLEPHPNIYVVN---KGGKADALNAGIVYS---AKELVITLDADTVLTESALTAVNKKFADEDVVAAGGMVHVL-QTKSMLVRVQMLDFLKAFYVIKVSIISGAFGIFNKNLLMEVG---GYR--SSVGEDIDITLKISRKENKKKKIVISDAISY--TELPETWRDLFKQRIRWQK-----G
>GT2-LpsRelated|EEF25446.1|Streptophyta_Viridiplantae Ricinus communis;-;Glyco_trans_2-like domain-containing protein
---------------TLPVMKQCV-----DEIIVVDMGSDDRSFEIYEEFVDRVVSYPA-----FGFAHPRNYGGQFA---RADWVLAIDSDELVEPEQVRALRQL--NPGATRAFNVTRNNYDQLIKGAPF---------------TVEKHRRFYRN----------DPAMRWEGLIHEEIASA-----YATAGEVDVT--LH--HLNYKTHGSAHEKQLLYS-------
>GT2-LpsRelated|WP_013604447.1|Crenarchaeota_Archaea Vulcanisaeta moutnovskia;-;Glycosyl transferase family 2
----TRNSG-KQLKLLLEHVGDVV-----DEIIVIDGYSVDDTVEVALSFGAKVFRRPW-----GYADPDRMFALRKA---SYDWILYLDTDERLSRRLKSELRDLIQKAEFGGFSALRVDYDSCGEVILGS---------------FYNRQIRIYKR----------DRVLY-KGLVHELPIVH-----GKIDLPESYY--II--HYP----EFNWRKGVFYA-------
>GT2-LpsRelated|WP_028987880.1|Firmicutes_Bacteria Thermicanus aegyptius;-;glycosyltransferase
LCMIVKNEA-DCIARCLESAGPLV-----DEIIVVDTGSTDGTDAICRSLGAKVFFRWN-----DDFSEARNYSLSLA---QGEWILWLDADEEI-EASPDELRELTASEAYDLYSF-RLNNYGARADRNQV---------------ITIAHPRLFRN----------RIGFRFHQRIHETLNVEEVLPGKERIGSAPIT--IW--HYGYDDYVKKKGKAERNLSLLKEE-
>GT2-LpsRelated|XP_005642730.1|Chlorophyta_Viridiplantae Coccomyxa subellipsoidea;-;Uncharacterized protein
LVMIVKDEV-ATINTTLGSMRDMI-----DYWTIVDTGSTDGTQDAIREYMVQLYEEPF-----VDFSTTRNFALR-A---HGDYAFMVDADYAVNNTWRLRVAAKRMQRECLHRSIPVCAK-VQIRLYSGT---------------TIFYTTRVFPT----------DEVGTDNGWVHESPSHT-----G----------------------------------------
>GT2-LpsRelated|XP_005702241.1|Rhodophyta_Protista Galdieria sulphuraria;-;Glycosyl transferase family protein
LCMIVRDEE-SNIEQALNSTIKFI-----DAAVITDTGSKDRTKEIIRDYFQNLSETPF-----VDFSHARNFNYSQA---KYHWFFQMDADDEVIAAENFKAQEICIPGKKILIRSIRGNTANYFG---------------------------VFDL----------ELSFMFFLPVHEMPFFE-----SN-----NIP--SV--HIPSNRI-HVLSRHNGY--------
>GT2-LpsRelated|YP_008433545.1|Caudovirales_Virus Pseudomonas phage PaBG;-;Glycosyl transferase family protein
VYAIAKNEA-KHVERWYESVKD-A-----DEIIVLDTGSTDGTQKLLSDLGVRVASMAF-----ERFDTARNAALNLV---SADYCMFIDLDETMPKGSIAAIRKAINKTQKDMYALRLVFKF----DHKRQ---------------PIVSYPRAVHR----------RNAFYWKYPVHELLACH-----QGE--------------------------------------
>GT2-Class1|ADX06263.1|Phycodnaviridae_Virus Organic Lake phycodnavirus 2;-;Glycotransferase family protein
------NTKATYLKECLDSIKHQECFH--MELVWINDGLTKILKHALQHFEKTTRFKYSENN--RGLGFTSNKGVILC---SHDIIMRMDSDDIMVPNRIEKQFIYMTNKEVHMCGGQIQMF-DDKNNNKG----VTNHPSILWKSYLNHPT-LCFRKSAMLEIG---NYD--PTLKQEDFEMELRMLKTYDFIYN-FPEVLLH--Y-----------------------R
>GT2-Class1|KKT30507.1|Bacteria_Bacteria Candidatus Nomurabacteria;-;WbfO protein
VVMSVYGEK--YLTQAIESILSQTYTD--FEFIIINDGSDKSLE-ILNKFKKENARIISREN--KGLIYSLNEGVRNA---RGEYIARMDADDISLSQRFEKQFKYMKE-DLAVCGTWAEGI-DNLGNKIKEMDYPPSANKIKIFTLFIHPS-VMFRKDVFEKVG---GYR--KIYLAEDHELWTRMIFT-YKADN-VPEKLLK--Y-----------------------R
>GT2-Class1|WP_008312996.1|Euryarchaeota_Archaea Haloarcula amylolytica;-;glycosyltransferase
VVLPTYGDDPDALREAIESIVSQTRVP--DELVIVRDGPPETNQTIIDNFESKYSFVPLAEN--QGRALARKVGVERC---QGDVVAMMDADDLCVPTRLERQETYLQNPEVDVVGAQLLEF-DENGEKLGVRTLPTDHEEIRDLAKVSQST-VIFKRTAALDIG---NYR--DVDRMEDYGLWVRMLVNGARFAN-IPEVLVK--A-----------------------R
>GT2-Class1|XP_004359770.1|Amoebozoa_Protista Cavenderia fasciculata;-;Bifunctional glycosyltransferase
IIVPVYTDDSEYFKLSVESIIKQTFTN--WLLIIVDDGSNADLTTYLHQL-RNPRIKELPQN--MGVYGALNAALAVA---NSTYIARMDADDYCHPERLEKQFNYLQLPDVDVVGSPISKF-DIDQERESMLRELKSPSNLIEHPVVVHPT-VLVRTTSLFKSN---SYS--NFGHVEDYALWLKMIGDGKKIDN-MP--------------------------------
>GT2-Class1|EEF26546.1|Streptophyta_Viridiplantae Ricinus communis;-;Glycosyltransferase, putative (Fragment)
-ITTVYDTDPSFLTDLAHTVFGQTTAE--FEWLILDNGTSRATRAVLTEIA-RDRRVRAEQN--LGIIGGMRWCLERA---QGRYVVPVDSDDLLFPDSLRTLSSFLEQGMPPVAYTDEDKT-DGDNHR-DAYLKPEWDPVLFVHS-CYIAHLTAIDRKTAIELG---CYDP-ATEGCHDWD-------------------------------------------------
>GT2-Class1|EMH74531.1|Amoebozoa_Protista Entamoeba histolytica HM-1:IMSS-B;-;Glycosyltransferase, group 2 family protein
-------------------------------LVIIDDADFEGVLQSLRSQSKQDEGIWLSAS--DHWSVMLAEAIAQM---DGDWIQLLHAGDQLDPFALLLLADRIRASNIVVYYGDEDQL-CND-IYQGPLFKPDFNLDMMRSY-PYVGRSLAFERRRTLEIG---GLNA-TFGELAPHDLVFRSAEALGSIGH-LDEV-IV--H------------------------
>GT2-Class1|KNC97028.1|Chytridiomycota_Fungi Spizellomyces punctatus;-;Glyco_trans_2-like domain-containing protein
ILTVTKNPKPIFESDTAAFVLQQSLQS--FRWIIVNDHTDIPAMAMLTRVAASDPRINNTGN--PGISNARNVARQHS---NAKYEVCLDDDDLRELVSLEQAVWLLETPHLAIVYMVSFGS-YQDTTLSGPH-----TGSRQLSG-N-----RLFSGSLYRRSA---SVNC-SYDGGDDYDYWLCLAANGNWGAT-IPEL-SY--WYR---------------------V
>GT2-Class1|WP_011611145.1|Cyanobacteria_Bacteria Trichodesmium erythraeum;-;Methyltransferase type 11
ILTPTWNSSLDWFVETVLSVLNQSIPD--WEWCIVDDGSKQLIKNVLAGLAEKESRILSEDN--GGISAATNKALKMA---TGEFICLLDHDDTLAPTALENSLSKLAE-GFDVVYSDEDKI-DFSGLNYTPFFKPDWSPEYFRGV-MYVGHLLCLRREIAVAVG---GFKS-EFDGVQDYEFMLRVSEQTNKIAH-ISKH-LY--HWR----------------------
>GT2-Class1|WP_052721681.1|Euryarchaeota_Archaea Methanosarcina siciliae T4/M;-;Glycosyl transferase, group 2 family protein
IIMPVYNVDKIWLEKAIDSVRNQLYEN--WELCIADDASTKEISKTLKEYLNIDCRIYLNNN--LGISGASNEALSLA---TGEFIGLLDNDDELSIDALYEVVKILNKPETDMVYSDEDKI-TMEGKRCNPFFKPDWSPDLLLAV-NYICHFTVIRKKLVEDIG---QFNV-GFEGSQDYDLFLRVIEKTNNIEH-IPKI-LY--HWR---------------------M
>GT2-Class1|XP_002405932.1|Arthropoda_Metazoa Ixodes scapularis;-;Glycosyltransferase, putative (EC 2.4.1.175) (Fragment)
IVLPVYNR-EKLLPFAIESCLNQSFKD--FELIIIDDCSKDNVI-VARKYAEQDSRIVNETN--KRLPASLNIAFIEA---KGEYFTWTSDDNLFHENALEKMVKTLDNPEIGLVYTDYTLI-DEQGSIGARLYQEP--PEFLPIR-DCVGACFLYRVDLARQVG---GYNE-NIQLVDDYEYWLRFGLVT-KFAH-IPES-LY--FYR---------------------V
>GT2-Class1|YP_004508523.1|Caudovirales_Virus Synechococcus phage S-CRM01;-;Glycosyl transferase
IITPTHKVT-KHLKELYESILKQYHQD--WEWVLWLNNGVGREVSW-----ARDPRVEDRTN--SKKVGHKHMAFHRG---RGDILVEADHDDLLLPHCLTRLAEEF-QSEVGFVGSDNAKL-HDGKELWAPLFQPS-SHSLCLIW-FAPDHVRAWRASVYREIG---GHNK-EMEVLDDQDLMIR-TYLRSKFIQ-LNEV-LY--IYR---------------------I
>GT2-CWR|WP_009989452.1|Crenarchaeota_Archaea Saccharolobus solfataricus;-;Glycosyl transferase family 2 (Glycosyltransferase family 2 protein)
IIVAIKDEDEKTIKELINNLSGLDYRF--YKVIIVSDDT-EEIESL-DKLPDNFVIIRRPENK-GRKAGALNFATNI--S-DAEMLVYLDAEARVEKDFLRKISQLDYDA-VAFRLKVRDVN-TQVQKIYSYVMNALFKARDKLGLIFANGSAFGIKRDILRKIG---GWK--ENSVAEDLELGIRLALSNIKVKY-VDDITVY--TLAPYTHTDLYNQIKRWAYG-----
>GT2-CWR|WP_023171856.1|Cyanobacteria_Bacteria Gloeobacter kilaueensis JS1;-;Glycosyl transferase family protein
LQVPCYAEPPEVVIQTLDRLAALDYPN--FEVMVIDNNTKDPLEAHCERLGERFRFFHVDPLA-GAKAGALNFALRHTPS-EVEIVGVIDADYHAEADFLSALLGHFDDPRMGFVQTPHDYR-DWQRSPYQRLCYWEYKTFFATTMPLTVGTMCLIRRRALEEAG---GWS--EWCQTEDSELAIRIHAAGYTSVY-VPQTFGR--GLIPETFAGYKKQRFRWTYGPVQEK
>GT2-CWR|WP_041107003.1|Proteobacteria_Bacteria Pseudomonas stutzeri;-;Beta-(1-3)-glucosyl transferase
VHVPCYNEPPEMVKQTLNALARLDYPN--FEVLVIDNNTRDPVQAHCEALGERFRFFHVAPLA-GFKGGALNYALERTHP-DAEVVAVIDSDYCVSPDWLRHMVPHFADPKIAVVQSPQDYR-DEHESLFKKLCYAEYKGFFHIGMVIQHGTMTMTRRKVLDEL----KWA--DWCITEDAELGLRVFEKGLSAAY-FEQSYGK--GLMPDTFIDFKKQRFRWAYGAMQIK
>GT2-Class1|AGE56308.1|Phycodnaviridae_Virus Paramecium bursaria Chlorella virus NE-JV-1;-;Glycosyl transferase
-------GG-KFLEACIESVQKSTLPN--VEHWIVVDGEHEAKVNILSKYEGKHPIKTLPKNVGGGWHRVFGSLPFLI---TSDYVAYLDDDNVVSPTQYADLLRSIVTKSKWSYCLR-YLM-DADGTRVGD--------DNCESLGYGPGNCYLIERDLAVMAG---PIWN-ARF-------------------------------------------------------
>GT2-Class1|EJY66983.1|Alveolata_Protista Oxytricha trifallax;-;Glycosyltransferase
VVMPSFNRG-KYLIESIECIKNQTYPN--WELIIVDNGSSDETLQVLEQLQNNDPRIKLNSDYGGAIPRNF--GISKA---RGEYITFLDDDDLMTFDRLQSAMDIFEAKDVEMVICDITSI-DHFGK-----FMKYEIRKPSDRFVVYFQATIIRNRRLKPYIY---NVPM-VSED-REQFNRLIFAHNAKIARV-TEYQGDYRRHPKQI-----V--------------
>GT2-Class1|WP_011954444.1|Euryarchaeota_Archaea Methanobrevibacter smithii;-;Glycosyltransferase, GT2 family (EC 2.4.1.-)
VVVATYNSG-DFLSEFLDSIKSQSFED--IEVIFVDDASTDSTLDLLHDFNKKYSNVFLDENSGPGTGRN--RGLDLA---GGEYVIFADHDDSYVENAFEVMYNE-ISENADFLITNYYKV-YERETVKEKTVFDGENVVVNTFKDIGPSWTKLFKKDFLAENN---IRFL-EGMLAEDLYVYVYALLKSKVYLD-DFYSYNYRDVDGN---------------------
>GT2-Class1|WP_020482957.1|Proteobacteria_Bacteria Methylomonas sp. MK1;-;glycosyltransferase
IIIPVYNSE-KYLEEALQSALSQTYNN--IEIIAVNDGSTDSSQDILKKYADS----IKILSQPLGASAARNLGVSVS---SGDILAFLDSDDIWDKNKLERQLEVLENPEAIGLYSDVRYI-DAQGNLIKATDAYRTGWCSGNILEGVFGFSVIIRRKNFELAG---GFPE-DVRQYEDYGLWLKLSLQGPFLYL-IDTLSSYRRHPASL-----TAS------K-----
>GT2-Class1|WP_048779465.1|Firmicutes_Bacteria Streptococcus cristatus;-;glycosyltransferase family 2 protein
ILLSTYNGE-QFLKEQVESIQQQTYQN--WQLFIRDDGSSDGTVAIIQELVAQDPRIFINEQIELGVIKSFHTLLKYE---KADFYCFSDQDDVWLPDKIALQVAEAEKDKPLLIYTDLKVV-DENLTVQHESMIRTQSDHANTELVTVTGGVAMINHALAELWT---GQEA-HDLLMHDWYLALLASAFGKLVYI-DKPTELYRQHSSNV-----LGA------R----T
>GT2-Class1|XP_007515612.1|Chlorophyta_Viridiplantae Bathycoccus prasinos;-;IPT/TIG domain-containing protein
VVMTHKNRP-EYCEKAVEALLQQTHRK--VEIVIVDDGSEEAHVKRLEQFVLKSVKIKIAKPGKLGEARNFGCSKLSE---KTEYVLFSDDDNLAETNEIETMLRVLVHKADVVTASNEFFV-TAAN---GTNVVVGSYHPLGNALFVFGDANALWRKSAFTSLE---GFKD-TSYSLQDWEILAKASSSGKLVTV-PAPLYKYRTH------------------------
>GT2-Rham-GlfT|CEL57271.1|Basidiomycota_Fungi Thanatephorus cucumeris;-;Uncharacterized protein
VIIPSYRVNLDSLSKVMNLKPSPS-----CFIIVVDNSPYAYELRHSNSQRSDVRIIVNDSN--YGASASRNRGLSV---SNAEWVAFLDDDVDPSMDYLVAAEQYNRP--AGFVGNTYFPIAHNIFTAAVRFSGIFFWDI--ANKIWGVTANLIIRRNVCDQV----KFDLRFTGGGEDIDFCINIRKESLERGGSAPNVVVA--H------------------------
>GT2-Rham-GlfT|ELZ79927.1|Euryarchaeota_Archaea Haloferax gibbonsii;-;Putative glycosyltransferase
AVVLNWN-NYEDTRRCLESLLGQN-----YSVILVDNSSTDNSGERLEREFENVTIKYSDSN--QGFAGGMNFGIQTAISDSADYIWLLNNDVHLPRNTLKNLIP-LLESNIGILSPTITDSADLWFLQGVRVDHSRPDRAINSLPDYIPMCASLIRSEVFEDVG---LLPEEYFMYFEDVEFCTEVKEAGYELYT-STNTKIT--H-IGADGDLSPLPTYYNFRNRIL-L
>GT2-Rham-GlfT|ERI12794.1|Proteobacteria_Bacteria Ochrobactrum sp. EGD-AQ16;-;Glyco_trans_2-like domain-containing protein
-IIVTFNPDVELLKQLIGAVIPQL-----GHLIVVDNGSD-DNLTLILKDQPDIELIALGEN--FGIAKAQNVGIEHAKAIGADYVLLLDQDSIPAPNMVAELVNALTEVQVAGVGPSYIDARQGEAAAFVYLDGLKLRRERQPLDAFLIASGCLTPIESFDAVG---LMDEGMFIDYVDIEWGLRAREKGYYCFG-VFDTKME--HTLGQIPVHSPLRHYYHFRNAIW-L
>GT2-Rham-GlfT|KII61799.1|Cnidaria_Metazoa Thelohanellus kitauei;-;N-acetylglucosaminyl-diphospho-decaprenol L-rhamnosyltransferase
-----------DCIDSILRGSFQD-----YELIVVDNNSSEDIDYLKIKNNDKIHFIDNDIN--FGFALGNILGIS---ESKGEYIFVLNNDTLVDEGALDILHSF-MEPDVSLCIPSQYNKDGSFAYLPSVGNQWFYMDRKKEYKK--MGSGMFFRASDYFKVG---GLDPNFFLYCEEEDICIRMKKEKMNIFF-VPDAKIV--HYGGSEFYRSLF--YFFDKNYNF-L
>GT2-Rham-GlfT|WP_019265215.1|Euryarchaeota_Archaea Methanobrevibacter smithii;-;glycosyltransferase family 2 protein
-VIVNYQDLTRNTINSILKYEYPFS----YEIIVVDNASADDSLSNLKNYKDSVKFISSKEN--NGFAAGNNQGLKIASGQ---YILLLNSDTVVWENTLEKIYNF-MEPFVGACGCRVLDKACKRSFPNVKNSFYRLFHIPTNSDGCLTGAFIFLRKKCLDSVG---LLDETFFMYGEDIDLCYRIKRDNWKIVY-FGKAKIT--HFKGSYEFYRAMYIYY---------
>GT2-Rham-GlfT|XP_004990389.1|Salpingoecidae_Choanoflagellida Salpingoeca rosetta;-;Uncharacterized protein
-VVPTYRCNLEQLRP-ILHLEAPP-----DYIVVVDRSDDPDAAACLQALENKFEYIRCQEN--TGAPEARNRGV---FESAAEFLLFLDDDVVPSRDIVAAYAAARNPN--GFAGPTFFPPMNTARTLGARLAGVTHFWDRAAKEDWAVTANVLLRR------------TEDLVFDGEDIDVCLKV--ADGRLIS-VPDATAV--H------------------------
>GT2-Rham-GlfT|XP_005851409.1|Chlorophyta_Viridiplantae Chlorella variabilis;-;Glyco_trans_2-like domain-containing protein
-------------------------------VVVVDDSPVQVADLLAEVQGAALAVHRLPTN--QGLAAACNVGLQLAAGMGAGVVLFTDDDCQPDADWVACMLAARTPGRTAATRPLFHDVFGTLNGRLLPDGSLLYGCTCNLSAGACGSSGLL-------------LFDESFSIAFENVEYCVRARKAGIAISY-APEALVL--H------------------------
>GT2-Rham-GlfT|XP_013309081.1|Nematoda_Metazoa Necator americanus;-;Glycosyltransferase, group 2 family protein
--VVVFHPDQQLLARTFASLAQAG-----AALYLVDNGGMPEMRASLAALSQACTVLAGHGN--VGYGRGHNLAIERASSRY--HLVLVDIDSSA-------LAEAFLEPEAGLLTPAIVDDAGQLQYFEARLARYEMRAQINERDTPPIVSGCLFRTSVLKTLA---GFDARYFLYFEDYDLSLRAHDVARVVY--APSVRVL--HHGGAMFLASAFKFYNRF-------
>GT2-Bre3|AAB49734.1|Arthropoda_Metazoa Drosophila melanogaster;EGH;Beta-1,4-mannosyltransferase egh (EC 2.4.1.-) (Protein egghead) (Protein zeste-white 4)
RVVTRGDFP-DLVKTNVLRNMNTLDTG--LENFVVTDKNQHR-R--IREIVVPKE---YKTRTGLFKSRALQYCLEDNVNVDSDWIVHLDEETLLTENSVRGIINFVLDGKHPFGQGLITYA-NENVVNWLTTLADSFRVSDDMGKLPLFSWGSVVTQVSAERSV---SFDNGDGSVAEDCFFAMRAFSQGYTFNF-IEGE-MY--EKSPFTLLDFLQQRKRWLQGILLVK
>GT2-Bre3|CEL99845.1|Alveolata_Protista Vitrella brassicaformis;-;Glyco_trans_2-like domain-containing protein
RVVTRGDSR-ELVRQICQTNKRLMDKL--RTRWVVTDKGDYT-N--IREIVVPTE---FKSAHNKYKARALHYANE--ASDPNDWIVHLDEETLLAESSVIGIIRHVNEHKKRIGQGVIVYG-HDDIINLPVTMADSIRVSDDYCRFPLQGMGSVVVPVDVEKDV---SFDLGEGSITEDAVFALKAMQKGYKFAF-ISGV-MR--EKSPFTFLDFLKQRRRWIQGLWLTK
>GT2-Bre3|KJY44855.1|Actinobacteria_Bacteria Streptomyces sp. NRRL S-444;-;Membrane glycosyltransferase
-VPTIGRHD-TALERSVLSYVEHLPPY--FPYMVLTEEEGNP-L--IRVVTVPKV---YETANGRFKARANHYAHELREGEDDVWVLHMDDDTGVGPDTAASMAQFVNRQRRHMAQGILAYP-RENAVNRFTWLADAVRPADDIARFPVAGVGELLLRASIEATI---GWDFGKA-IVEDAQLALTCRKYPGRSDW-FNGR-CY--GASPATTRDFIKQRERWAWGLVALR
>GT2-Bre3|KND04364.1|Chytridiomycota_Fungi Spizellomyces punctatus;-;Glyco_trans_2-like domain-containing protein
--VTKGDNK-EAVMRAW--NAHKLEKL--DPCIVLTDEHN------INCYTCPKS---FSTAR-KYKARALEWYRT--TMREHDWVLHLDEESVIDDESVQRCLNFIRYEKYSWGQGIILYN-QYKFWNPFFTVADGLRVGDDLARFPVFGAGSLLTNGAVENAV---TWDL--GSLTEDFQFAVSAWKLGFKCGN-ISGI-VR--EQSPLDLIGFLKQRRRWFVGI----
>GT2-Bre3|NP_499087.2|Nematoda_Metazoa Caenorhabditis elegans;BRE3;Beta-1,4-mannosyltransferase bre-3 (EC 2.4.1.-) (Bacillus thuringiensis toxin-resistant protein 3) (Bt toxin-resistant protein 3)
RVVTKGNFP-LLVKENIDTNMKTFEAG--MENFVVTDKNPNP-R--VREVVVPTV---YKTKSGKFKARALQYCLEDDVNIPTDWIVHLDEETLLTTNAICGILNFCEDGKHQFGQGVITYA-NGDIVNWLTTLSDSFRVADDMGKLPLFGWGSVVTQVEAERDV---SYDHGEGSIAEDCFFSMVAMKHGYSFDF-IEGE-MH--EKSPFTMWDFLQQRKRWLQGILLT-
>GT2-Bre3|WP_049911327.1|Euryarchaeota_Archaea Halorubrum coriense;-;glycosyltransferase family 2 protein
RVLTIDAEP--VVQQTVNA----LPDG--IADVVIAEANG------AQVHVVPDD---F--DCNTNKGRAVEWARR---NVDKEYLLYLDEDTLVTGLTGLPDADFIQFTEKPIYTG-----------SRLTYLCEVFRTGYQFEQLPLYAWGGAIRR-EIEQEV---GWNV--ATITEDTNLIWRAAKRDLTYQL-IDAR-FR--NQAPPSLKSMIKQRRRWMSG-----
>GT2-Bre3|XP_003079088.1|Chlorophyta_Viridiplantae Ostreococcus tauri;-;Unnamed product
--VSREAKP-LAVKRAVDVAIEILQRS--IPTFVVSYKGGAA----VNELIVPLE---MNDR---FQGNTGLLSYATRASSWGDWVVHMGSDALLNVRAVDAVLAHCARETRRLAQGAVLPG-IESAFQWIPAMAECIRAGESYGALVVAPINTLVVPNELELAV---GFGDMVHDGFELTSFALMCSNNGVKFAW-LDAG-VH--VPIISNVWKLFKARAR---------
>GT2-Bre3|XP_975496.1|Arthropoda_Metazoa Tribolium castaneum;-;Beta-1,4-mannosyltransferase egh-like Protein
RVVTRGDFP-QLVKNNVNRNMNKLDAG--LENFVVTDKGKHR-K--VREIVVPQD---YRTKSGLFKARALQYCLEDDVNVPNDWIVHLDEETLLTENSVRGILNFVGDGKHQFGQGLITYA-NEEVVNWITTLADSFRVTDDMGKLPLFSWGSVVTQVGAEREV---SFDNGDGSIAEDCFFAMKAFSKGYSFNF-IEGE-MW--EKSPFTFWDFIQQRKRWIQGILLVK
>GT2-CeS|AAD15482.1|Streptophyta_Viridiplantae Arabidopsis thaliana;CSLCC;Probable xyloglucan glycosyltransferase 12 (EC 2.4.1.-) (Cellulose synthase-like protein C12) (AtCslC12)
VQIPMCNEK-EVYQQSIAAVCNLDWPKGKILIQILDDSDDPILIKEEVHKWQKGARIHRVNRE-GYKAGNLKSAMNVK---DYEFVAIFDADFQPLPDFLKKTIPHFKDNEIGLVQARWSFV-NKEENLLTRLQNINLAFHFEVEQQGFNGTAGVWRIKALEDSG---GWL--ERTTVEDMDIAVRAHLHGWKFVF-LNDVECQ--CELPESYEAYRKQQHRWHSG----P
>GT2-CeS|AAD23884.1|Streptophyta_Viridiplantae Arabidopsis thaliana;CSLC8;Probable xyloglucan glycosyltransferase 8 (EC 2.4.1.-) (Cellulose synthase-like protein C8) (AtCslC8)
VQIPMCNER-EVYEQSISAVCQLDWPKDRLLVQVLDDSDDESLIRDEVTKWSQGVNIHRLVRT-GYKAGNLKSAMSVE---AYEFVAIFDADFQPNSDFLKLTVPHFKEPELGLVQARWAFV-NKDENLLTRLQNINLCFHFEVEQQGFNGTAGVWRIKALEESG---GWL--ERTTVEDMDIAVRAHLHGWKFIY-LNDVKVL--CEVPESYEAYKKQQHRWHSG----P
>GT2-CeS|AAF02144.1|Streptophyta_Viridiplantae Arabidopsis thaliana;CSLC6;Probable xyloglucan glycosyltransferase 6 (EC 2.4.1.-) (Cellulose synthase-like protein C6) (AtCslC6)
VQIPMCNEK-EVYQQSIGAVCMLDWPRERMLVQVLDDSSELDLIKAEVQKWQQGVRIHRLIRT-GYKAGNLKAAMNVK---DYEFVAIFDADFQPPADFLKKTVPHFKNEELALVQTRWAFV-NKDENLLTRLQNINLSFHFEVEQQGFNGTAGVWRIKALEDCG---GWL--ERTTVEDMDIAVRAHLCGWKFIY-LNDVKCL--CELPESYEAYKKQQYRWHSG----P
>GT2-CeS|AAL24081.1|Streptophyta_Viridiplantae Arabidopsis thaliana;CSLA7;Glucomannan 4-beta-mannosyltransferase 7 (EC 2.4.1.32) (Cellulose synthase-like protein A7) (AtCslA7) (Glucomannan synthase) (Mannan synthase 7)
VQIPMYNEK-EVCEQSIAAACKISWPSNRIIIQVLDDSTDPALVKKECDRWSKGVNIIRDNRN-GYKAGALREGMRHSYVKQCDYVAIFDADFQPDPDFLHRTPFLIHNPKLALVQGRWEFV-NAGQCMMTRLQEMSLSYHFTIEQQGFNGTAGVWRISALNESG---GWN--DQTTVEDMDLAVRATLRGWKFLY-IDDLKVK--SELPCSFKALRSQQHRWTCG----P
>GT2-CeS|AAN15522.1|Streptophyta_Viridiplantae Arabidopsis thaliana;CSLA3;Probable glucomannan 4-beta-mannosyltransferase 3 (EC 2.4.1.32) (Cellulose synthase-like protein A3) (AtCslA3) (Glucomannan synthase) (Mannan synthase 3)
IQIPMYNEK-EVCQLSIGAACRLSWPLDRMIVQVLDDSTDPALVNAECDKWARGINIIRDNRI-GYKAGALKAGMMHNYVKQCEFVAIFDADFQPDPDFLERTPFLIHNHEISLVQCRWKFV-NANECLMTRMQEMSLNYHFVAEQEGFNGTAGVWRIAALNEAG---GWK--DRTTVEDMDLAVRACLHGWKFVY-VHDVEVK--NELPSTFKAYRFQQHRWSCG----P
>GT2-CeS|AAO42230.1|Streptophyta_Viridiplantae Arabidopsis thaliana;CSLA1;Probable glucomannan 4-beta-mannosyltransferase 1 (EC 2.4.1.32) (Cellulose synthase-like protein A1) (AtCslA1) (Glucomannan synthase) (Mannan synthase 1)
IQIPMYNEK-EVFQLSIAAICSLVWPSSRLVVQVVDDSTDPAGVDVEIAKWSQGINIRRDNRN-GYKAGAMKEALTQSYVKQCDFVAVFDADFQPEPDYLIRVPFLVHNPDVALVQARWIFV-NANKCLMTRMQEMSLNYHFKVEQEGFNGTAGVWRISAMEAAG---GWK--SRTTVEDMDLAVRVGLHGWKFVY-LNDLTVR--NELPSKFKAYRFQQHRWSCG----P
>GT2-CeS|AAX98242.1|Streptophyta_Viridiplantae Chara globularis;-;Putative glucosyltransferase
IQIPMFNER-ECYKISIGACSRLDWPRDKLVIQVLDDSNNEEMVKEEVSRWAQGVNIHRVDRT-GYKGGSLKEGMKVK---ECDFVAVFDADFQPRPDWLLRTVPYFKDPKLALVQTRWEYS-NQFCNLLTRFQFINTSYHFQVEQQGFNGTGGIWRIAAVNECG---GWD--VRTTVEDMDIAVRAHIHGLKFVY-LNDVRVP--CELPQTLEAYTRQQHRWHAG----P
>GT2-CeS|ABK77754.1|Thaumarchaeota_Archaea Cenarchaeum symbiosum;-;Glycosyltransferase
IQLPIYNEK-YVAARLISAVCDMDYPKDRLRIMVLDDSDDDTVGGIVKEYRDRGLQIRRGTRR-GYKAGALQHAMKST---DTEYVAIFDADFIPPKEFLRKTLPHFARADMGFVQCRWGHV-NEDYSTITQAQALSLDFHFLIEQKNFNGTAGIWKRECIEDAG---GWH--TATLVEDLDLSYRAQMKGWKCTF-LPDVVID--AELPVQMNAAKRQQFRWAKG----S
>GT2-CeS|AIF06308.1|Thaumarchaeota_Archaea uncultured marine thaumarchaeote KM3_190_E06;-;Glycosyl transferase family protein
IHLPIYNEK-YVAKRLVDSVCDLDYPKQKMRIMVLDDSDDNTIAGIVQDYKSKGFDIRRGTRQ-GYKAGALKYAMKYT---KSEFVAIFDADFIPPKWYLKRAIPYFAKPNIGLVQCRWGHV-NENYSALTQAQALSLDFHFLVEQRNFNGTAGIWRKECIEDSG---GWH--TATLVEDLDLSYRAQMKGWKCLF-IPDIVVD--AELPVQMNGAKRQQFRWAKG----S
>GT2-CeS|BAB01433.1|Streptophyta_Viridiplantae Arabidopsis thaliana;CSLC4;Xyloglucan glycosyltransferase 4 (EC 2.4.1.-) (Cellulose synthase-like protein C4) (AtCslC4) (Xyloglucan synthase 4)
IQIPMCNER-EVYEQSIGAASQLDWPKDRILIQVLDDSDDPNLIKEEVSVWAKGVNIHRLIRT-GYKAGNLKSAMTVK---DYEFVTIFDADFTPNPDFLKKTVPHFKNPELGLVQARWSFV-NKDENLLTRLQNINLCFHFEVEQQGFNGTAGVWRIKALEESG---GWL--ERTTVEDMDIAVRAHLNGWKFIY-LNDVEVT--CELPESYEAYKKQQHRWHSG----P
>GT2-CeS|BAB11680.1|Streptophyta_Viridiplantae Arabidopsis thaliana;CSLA2;Glucomannan 4-beta-mannosyltransferase 2 (EC 2.4.1.32) (Cellulose synthase-like protein A2) (AtCslA2) (Glucomannan synthase) (Mannan synthase 2)
VQIPMFNER-EVYKLSIGAACGLSWPSDRLVIQVLDDSTDPTMVEVECQRWAKGINIIRENRV-GYKAGALKEGLKRSYVKHCEYVVIFDADFQPEPDFLRRIPFLMHNPNIALVQARWRFV-NSDECLLTRMQEMSLDYHFTVEQEGFNGTAGIWRIAAINEAG---GWK--DRTTVEDMDLAVRASLRGWKFLY-LGDLQVK--SELPSTFRAFRFQQHRWSCG----P
>GT2-CeS|CAB79877.1|Streptophyta_Viridiplantae Arabidopsis thaliana;CSLC5;Probable xyloglucan glycosyltransferase 5 (EC 2.4.1.-) (Cellulose synthase-like protein C5) (AtCslC5)
VQIPMCNER-EVYEQSISAVCQLDWPKDRILVQVLDDSNDESLIKAEVAKWSQGVNIHRLVRT-GYKAGNLKSAMSVE---AYEYVAIFDADFQPTPDFLKLTVPHFKDPELGLVQARWTFV-NKDENLLTRLQNINLCFHFEVEQQGFNGTAGVWRIKALEESG---GWL--ERTTVEDMDIAVRAHLHGWKFIY-LNDVKVL--CEVPESYEAYKKQQHRWHSG----P
>GT2-CeS|CAB82941.1|Streptophyta_Viridiplantae Arabidopsis thaliana;CSLA9;Glucomannan 4-beta-mannosyltransferase 9 (EC 2.4.1.32) (Cellulose synthase-like protein A9) (AtCslA9) (Glucomannan synthase) (Mannan synthase 9) (Protein RESISTANT TO AGROBACTERIUM TRANSFORMATION 4)
IQIPMFNER-EVYQLSIGAACGLSWPSDRIVIQVLDDSTDPTLVEMECSRWAKGVNIIRDNRN-GYKAGALKEGMKKSYVKSCDYVAIFDADFQPEADFLWRTVPYLHNPKLALVQARWKFV-NSDECLMTRMQEMSLDYHFTVEQEGFNGTAGIWRISALNEAG---GWK--DRTTVEDMDLAVRASLKGWKFLY-LGSLKVK--NELPSTFKAYRYQQHRWSCG----P
>GT2-CeS|NP_173818.1|Streptophyta_Viridiplantae Arabidopsis thaliana;CSLAA;Probable glucomannan 4-beta-mannosyltransferase 10 (EC 2.4.1.32) (Cellulose synthase-like protein A10) (AtCslA10) (Glucomannan synthase) (Mannan synthase 10)
VQIPMYNEK-EVLQLSIGAACRLIWPLDRLIVQVLDDSTDQTLVNTECAKWEKGVNIRRDNRN-GYKAGALKEGMKHN---YCNYVVIFDADFQPEPDYLQHVPFLVHNPEVALVQARWRFM-NANKCLMTRMQEMSLNYHFMAEQESFNGTAGVWRMAAMEEAG---GWH--DRTTVEDMDLAVRAGLLGWKFVF-LNDLTVK--SELPSKFKAFRFQQHRWSCG----P
>GT2-CeS|NP_191159.2|Streptophyta_Viridiplantae Arabidopsis thaliana;CSLAE;Probable glucomannan 4-beta-mannosyltransferase 14 (EC 2.4.1.32) (Cellulose synthase-like protein A14) (AtCslA14) (Glucomannan synthase) (Mannan synthase 14)
IQIPIFNEK-EVCQLSIGAACKLSWPLDRMIIQVLDDSTEEELVRLECKKWEEGITIVRGGRE-GFKAGALTAGMKHSYVDKCEFVVIFDADFQPEPDFLERTPFLVHNPEIALVQAGWKYG-NADECCMTRIQEMSLNYHFAVEQKGFNGTAGVWRIKALNEAE---GWK--DRTIVEDMDLAVRAYLRGSKFVY-VDDVKVK--NELPSSFQAYRFQQHRWSCG----P
>GT2-CeS|NP_193077.2|Streptophyta_Viridiplantae Arabidopsis thaliana;CSLAF;Probable glucomannan 4-beta-mannosyltransferase 15 (EC 2.4.1.32) (Cellulose synthase-like protein A15) (AtCslA15) (Glucomannan synthase) (Mannan synthase 15)
VQIPMYNER-EVFELSIGAACRLTWPSDRLIVQVLDDSTDPALVSMECTKWAKDINIRRENRN-GYKAGALKHGMRHSYVKQCQYLAIFDADFQPEPDYLQRIPFLIHNPEVALVQARWRFV-NANTCLMTRMQEMSLNYHFMAEQQGFNGTAGVWRMVAMEEAG---GWK--DRTTVEDMDLAVRVGLLGWKFIF-VNDLEVK--SELPSQFKAFRFQQHRWSCG----P
>GT2-CeS|NP_197123.3|Streptophyta_Viridiplantae Arabidopsis thaliana;CSLAB;Probable glucomannan 4-beta-mannosyltransferase 11 (EC 2.4.1.32) (Cellulose synthase-like protein A11) (AtCslA11) (Glucomannan synthase) (Mannan synthase 11)
VQIPMYNER-EVFKLSIGAACRLIWPLDRLIVQVLDDSTDPTMVSTECGKWAKGINIRRDNRN-GYKAGALKQGMRHSYVKTCTYIAIFDADFQPEPDYLERTPFLIHNPELALVQARWKFV-NAKKCLMTRMQEMSLNYHFTAEQEGFNGTAGVWRLAAMEEAG---GWK--DRTTVEDMDLAVRVGLHGWKFVF-VNDVSVK--SELPSQFKAFRFQQHRWSCG----P
>GT2-CeS|WP_013143401.1|Crenarchaeota_Archaea Staphylothermus hellenicus;-;Glycosyl transferase family 2
IIIPVRNEI-ELMQEALNDI--YSWNRDNIEVIIISDDPPERIEKLVYSWRQRGLNVWRSEPK-GYKAGALNTALLAS---RGKYLYVVDVDSRVSPSFIVKAAIMMKNKNVAAVVARWTGK-NRDTRVAEAVFA-SMKFIVDALYKFPVGTGTLFNAEFIRELG---GWD--EERIQDDMEIGCRIMARGKEILF-LDDEKVY--VEVPRRFKSLRVQQERWAYG----S
>GT2-CeS|WP_045801387.1|Bacteroidetes_Bacteria Muricauda lutaonensis;-;Glucomannan 4-beta-mannosyltransferase
IQLPIYNEE-YVVERLLDNISKIEYPKSKLEIQVLDDSTDDSTAKKIEELQKQGLDIRRENRQ-GFKAGALKEGLAIA---KGDFIAIFDADFMPESDWLKKTVPYFKDEEIGVVQTRWGHI-NRDYSTLTKIQAFALDAHFTLEQVNFNGTAGIWRKQCIIDAG---NWE--GDTLTEDLDLSYRAQLKDWKFKY-LEDVETP--AELPVVMSAARSQQFRWNKG----G
>GT2-CeS|XP_001618937.1|Cnidaria_Metazoa Nematostella vectensis;-;Predicted protein (Fragment)
IQLPVYNEL-YVMERLLNNIVNIEYPKDKLEIQVLDDSTDESTAKQIERLQKTGIDIQRENRI-GFKAGALKEGLEKA---KGEFIAIFDADFLPEKDWLLKTVPYFKNPEIGVVQTRWGHI-NRNYSTLTKIQAFALDAHFTLEQVNFNGTAGIWRKECIYDAG---NWE--GDTLTEDLDLSYRAQLKKWKFKY-LENVVTP--AELPVIISAARSQQFRWNKG----G
>GT2-CeS|XP_002508565.1|Chlorophyta_Viridiplantae Micromonas commoda;-;Glycosyltransferase family 2 protein
VQLPMFNEK-EVCQAVIDAACQLDWPKSRMMVQVLDDSTCETIEDKVFEHRERGVNVTRTNRG-GYKAGAMNDAMCDI---EQDHCAVFDADFDPAPDFLRRTVPYLHNPKVGFVQARWVYS-NGTESLLTRVQEISLNYHIRCEQYNFNGTAGVWRRKCIVDSG---GWN--CRTTVEDMDLSLRAYLRGWRFVF-LDDVTCL--NEIPAQYGAYRKQQHRWSCG----P
>GT2-CeS|XP_006851749.1|Streptophyta_Viridiplantae Amborella trichopoda;-;Uncharacterized protein
VQIPMYNEK-EVYQLSIGAACGLSWPSDRIIIQVLDDSTDPTLVELECQRWAKGINIIRDNRN-GYKAGALKEGMKHGYVRDCDYVAIFDADFQPEPDFLWRTPFLIHNPEIGLVQARWKFV-NSDECLMTRMQEMSLDYHFTVEQEGFNGTAGVWRIAALNEAG---GWK--DRTTVEDMDLAVRASLKGWKFVY-LGDLKVK--NELPSTFKAYRYQQHRWSCG----P
>GT2-CeS|XP_011401153.1|Chlorophyta_Viridiplantae Auxenochlorella protothecoides;-;Glucomannan 4-beta-mannosyltransferase 9
VQLPMFNER-AVCQAIIDCCCELHWPTQRLKIQVLDDSTDTVLVDKVLEWSERGLDIRRTNRQ-GYKAGAMKEGMDLL---IKQYVAVFDADFKPEPGFLYQTIPYLENPSVGYVQSRWVFT-NPQESYLTKAQEVSLNYHMKCEQYNFNGTAGVWRCACIETSG---GWN--SRTTVEDMDLSLRAYVRGWKAIF-LDNVTCL--NELPASFFAYRKQQHRWTCG----P
>GT2-CeS|XP_013756520.1|Apusozoa_Protista Thecamonas trahens ATCC 50062;-;Glycosyltransferase
IQLPVFNEG-AICERLLSKCLELEYPTHALVIQLLDDSTDNTVKQFLALVAPTKFRVRRENRV-GYKAGALREGMRLP---DADFIAIFDADFMPEPDFLAYTLPYFYNDKVACVQARWDFT-NRYYNLMTYIQAVALDGHFMIEQRHFNGTGGVWRREAIEDAG---GWS--QDTLAEDLDLSFRAQFRGWQMVY-VNDVLAP--NEIPPTVSAFKKQQYRWAKG----S
>GT2-CeS|AAC04910.1|Streptophyta_Viridiplantae Arabidopsis thaliana;CSLD1;Cellulose synthase-like protein D1 (AtCslD1) (EC 2.4.1.-)
VFVSTAKEPPLVTANTLLSILAVDYPIEKLSAYISDDGGILTFEAMAEAVRFAEYW-YVSREKRGFKAGAMNGMVRASAILNGAFILNLDCDHIYNSKAIKEGMCFMMDDRICYIQFPQRFE-GIDPSDRYA----NHNTVFFDGNMVYVGTGCMFRRYALDRIG---WIY--G-SVTEDVVTGYRMHNRGWRSVYCITKRDAFR-GTAPINLTDRLHQVLRWATGSVEIF
>GT2-CeS|AAC25936.1|Streptophyta_Viridiplantae Arabidopsis thaliana;CSLB4;Cellulose synthase-like protein B4 (AtCslB4) (EC 2.4.1.-)
-------EPPLIVVNTVLSLLAVNYPANKLACYVSDDGCSP-------------HVVYISREKRHYKAGAMNFLVRMT---NAPYMLNVDCDMVNEADVVRQAMCIFLDNHCAFVQYPQDFY----------DSNVGELTVLQLYLGQYAGSGCFHTRRVMY------GLS--LDSTTEDVNTSIGIHSRGWTSSY-IPDPPAFL-GCMPQGGPEVMVQQRRWATGLLEIL
>GT2-CeS|AAC25944.1|Streptophyta_Viridiplantae Arabidopsis thaliana;CSLB2;Cellulose synthase-like protein B2 (AtCslB2) (EC 2.4.1.-)
-FVPTADEPPIMVVNTVLSLLAVNYPANKLACYVSDDGCSP-------------HIVYISREKRHYKAGAMN-FLART---NAPYMLNVDCDMYAEADVVRQAMCIFLQSQCAFVQFPQEFY-DSNTIKLT---------VIKSYMGINVGSGCFHSR----------GWL--YDSMSEDMNTSIGIHSRGWTSSY-IPDPPAFL-GSMPPGGLEAMIQQRRWATGSIEVL
>GT2-CeS|AAC39334.1|Streptophyta_Viridiplantae Arabidopsis thaliana;CESA1;Cellulose synthase A catalytic subunit 1 [UDP-forming] (AtCesA1) (EC 2.4.1.12) (Protein RADIALLY SWOLLEN 1) (AtRSW1)
------KEPPLVTANTVLSILSVDYPVDKVACYVSDDG-------------------YVSREKRHKKAGAMNALIRVT---NGAYLLNVDCDHNNSKAIKEAM--CFMMPAIGYVQFPQRFD-GID----LHDRYANRNIVFFDINMVYVGTGCCFNRQALKEIG---WIY--G-SVTEDILTGFKMHARGWISIY-CPRPAFK--GSAPINLSDRLNQVLRWALGSIEIL
>GT2-CeS|AAC39335.1|Streptophyta_Viridiplantae Arabidopsis thaliana;CESA2;Cellulose synthase A catalytic subunit 2 [UDP-forming] (AtCesA2) (Ath-A) (EC 2.4.1.12)
------KEPPLITANTVLSILAVDYPVDKVACYVSDDG---------------YVSREKRPGFDHKKAGAMNSLIRVSAVLNAPYLLNVDCDHINNSKAIRESMCFMMDKKVCYVQFPQRFD-GIDRHDR----YSNRNVVFFDINMIYVGTGCVFRRQALKEIG---WIY--G-SVTEDILTGFKMHCHGWRSVYCMPKRAAFK-GSAPINLSDRLHQVLRWALGSVEIF
>GT2-CeS|AAC39336.1|Streptophyta_Viridiplantae Arabidopsis thaliana;CESA3;Cellulose synthase A catalytic subunit 3 [UDP-forming] (AtCesA3) (EC 2.4.1.12) (Constitutive expression of VSP1 protein 1) (Isoxaben-resistant protein 1) (Ath-B) (Protein ECTOPIC LIGNIN 1) (Protein RADIALLY SWOLLEN 5) (AtRSW5)
------KEPPLVTANTVLSILAVDYPVDKVSCYVFDDG-------------------YVSREKRHKKAGAMN-ALVRT---NGPFILNLDCDHYINNSKALREAMCFLMPNLGYVQFPQRFD-GIDKNDRYA----NRNTVFFDINLVYVGTGCVFNRTALMEIG---WIY--G-SVTEDILTGFKMHARGWRSIY-CMLPAFK--GSAPINLSDRLNQVLRWALGSVEIL
>GT2-CeS|AAD20396.1|Streptophyta_Viridiplantae Arabidopsis thaliana;CESA9;Probable cellulose synthase A catalytic subunit 9 [UDP-forming] (AtCesA9) (EC 2.4.1.12)
------KEPPLITANTVLSILAVDYPVEKVACYVSDDGN--ELPRLV------YVSREKRPGFDHKKAGAMNSLIRVSAVLNAPYLLNVDCDHYINNSKAIREAMCFMMPKICYVQFPQRFD-GIDRHDR----YSNRNVVFFDINMIYVGTGCVFRRQALKEIG---WIY--G-SVTEDILTGFKMHCHGWRSVYCMPKRAAFK-GSAPINLSDRLHQVLRWALGSVEIF
>GT2-CeS|AAD20713.1|Streptophyta_Viridiplantae Arabidopsis thaliana;CESAA;Probable cellulose synthase A catalytic subunit 10 [UDP-forming] (AtCesA10) (AtCesA13) (EC 2.4.1.12)
------KEPPLVTANTVLSILAVDYPVDKVACYVSDDG-------------------YVSREKRHKKAGAMNALIRVT---NGAYLLNVDCDHNNSKAIKEAM--CFMMPAIGYVQFPQRFD-GID----LHDRYANRNTVFFDINLVYVGTGCCFNRQALKEIG---WIY--G-SVTEDILTGFKMHARGWISIYCVPSRPAFK-GSAPINLSDRLNQVLRWALGSIEIL
>GT2-CeS|AAD32031.1|Streptophyta_Viridiplantae Arabidopsis thaliana;CESA7;Cellulose synthase A catalytic subunit 7 [UDP-forming] (AtCesA7) (EC 2.4.1.12) (Protein FRAGILE FIBER 5) (Protein IRREGULAR XYLEM 3) (AtIRX3)
------KEPPLVTSNTVLSILAMDYPVEKISCYVSDDGAS-----------------YVSREKRHKKAGAMN-ALVRT---NAPFMLNLDCDHYVNNSKAVREAMCFLMPQIGYVQFPQRFD-GIDTNDRYA----NRNTVFFDINMVYVGTGCVFKRQAL-------GWI--YGSITEDILTGFKMHCRGWRSIY-CMRPAFK--GSAPINLSDRLNQVLRWALGSVEIF
>GT2-CeS|AAF02892.1|Streptophyta_Viridiplantae Arabidopsis thaliana;CSLD5;Cellulose synthase-like protein D5 (AtCslD5) (EC 2.4.1.-)
VFVSTAKEPPLVTANTILSILAVDYPVEKLACYLSDDGGALLTFEALAQTASFASRKYVSREKRGYKAGAMN-ALVRTSAINGPFILNLDCDHYIYNSMLREGMCFMLDDRICYVQFPQRFE-GIDPNDRYA----NHNTVFFDVSMMYVGTGCIFRRTAL-------GWI--YGSVTEDVVTGYRMHNRGWRSIYCVTKRDAFR-GTAPINLTDRLHQVLRWATGSVEIF
>GT2-CeS|AAF26119.1|Streptophyta_Viridiplantae Arabidopsis thaliana;CSLD3;Cellulose synthase-like protein D3 (AtCslD3) (EC 2.4.1.-) (Protein KOJAK)
------KEPPLVTSNTILSILAADYPVEKLACYVSDDGGALTFEAMAEAASFANMWVYVSREKRGYKAGAMNALVRMS---NGPFILNLDCDHIYNSQALREGMCFMMDDRLCYVQFPQRFE-GIDPSDRYA----NHNTVFFDVNMVYVGTGCLFRRIAL-------GWI--YGSVTEDVVTGYRMHNRGWKSVYCVTKRDAFR-GTAPINLTDRLHQVLRWATGSVEIF
>GT2-CeS|AAF79313.1|Streptophyta_Viridiplantae Arabidopsis thaliana;CSLE1;Cellulose synthase-like protein E1 (AtCslE1) (EC 2.4.1.-)
VFVCTADEPPLLVVNTVLSVTALDYPPEKLAVYLSDDGGSE------------YLSREKRPQHHNFKAGAMNALVSNT---CGKIILNLDCDMYANNSSTRDALCILLDKEIAFVQFPQCFD-NVTRNDLYGSMMRVGIDALASCTYM--------------------GVK--YGCPVEDVITGLTIQCRGWKSAY-LNEKQAFL-GVAPTNLHQMLVQQRRWSEGDFQI-
>GT2-CeS|AAG23436.1|Streptophyta_Viridiplantae Arabidopsis thaliana;CSLD6;Putative cellulose synthase-like protein D6 (AtCslD6) (EC 2.4.1.-)
VFVSTAKEPPLVTANTILSILSVDYPVEKLSVYISDDGGS-----------------YVSREKRGYKAGAMNALVRMS---NGPFILNLDCDHRAFRDGICFMMDH--DDRVSYVQFPQRFE-GIDPSDRYA----NKNTVFFDINLMYVGTGCLFRRTAL-------GWI--YGSVTEDVVTGFRMHEKGWRSFYCVTEPDAFR-GSAPINLTDRLHQVLRWATGSVEIF
>GT2-CeS|AAL90907.1|Streptophyta_Viridiplantae Arabidopsis thaliana;CSLB3;Cellulose synthase-like protein B3 (AtCslB3) (EC 2.4.1.-)
-------EPPILVANTLLSLLAVNYPANKLACYVSDDGCSP-------------HFVYISREKRHYKAGAMNFLVRMT---NAPYMLNVDCDMYAEADVVRQAMCIFLQSMCAFVQFPQEFY----------DSNADELTVLQSYLGTYAGSGCFHTRRVMY------GLS--IESTAEDANTSIGIHSRGWTSSY-IPKPPAFL-GAMPPGGPEAMLQQRRWATGLLEVL
>GT2-CeS|AAM20086.1|Streptophyta_Viridiplantae Arabidopsis thaliana;CSLG2;Cellulose synthase-like protein G2 (AtCslG2) (EC 2.4.1.-)
VFICTYKEPPMMVVNTALSVMAYEYPSHKISVYVSDDGGS-----------------YVSREKPHFKAGALNTLLRMT---NSPIILTLDCDMTPLHAL------CYLSPKIGFVQFPQKFQ-GVNKNDIYASELKRP----FDINTVHMGTGCFFNRRAIETFGPNRGFR--YGSLVEDYFTGFMLHCEGWRSIF-CSPTKAY--GDSPKCLTDVIGQQIRWSVGLLEVA
>GT2-CeS|AAM20487.1|Streptophyta_Viridiplantae Arabidopsis thaliana;CESA8;Cellulose synthase A catalytic subunit 8 [UDP-forming] (AtCesA8) (EC 2.4.1.12) (Protein IRREGULAR XYLEM 1) (AtIRX1) (Protein LEAF WILTING 2)
------KEPPLITANTVLSILALDYPVDKVSCYVSDDG-------------------YVSREKRHKKAGAEN-ALVRT---NAPFILNLDCDHYVNNSKAVREAMCFLMPVVGFVQFPQRFD-GIDKSDRYA----NRNIVFFDVNMVYVGTGTVFRRQALKEIG---WIY--G-SITEDILTGFKMHCRGWRSIY-CMRPAFK--GSAPINLSDRLHQVLRWALGSVEIF
>GT2-CeS|AAO15532.1|Streptophyta_Viridiplantae Arabidopsis thaliana;CESA4;Cellulose synthase A catalytic subunit 4 [UDP-forming] (AtCesA4) (EC 2.4.1.12) (Protein IRREGULAR XYLEM 5) (AtIRX5)
------KEPPIITANTILSILAVDYPVNKVSCYVSDDGAS-----------------YVSREKRHKKAGAMNAMVRVT---NAPFMLNLDCDHYINNSKAIRESMCFLMPQLGYVQFPQRFD-GIDHNDRYA----NRNIVFFDINMVYVGTGCVFNRPALKEIG---WIY--G-SVTEDILTGFRMHCRGWKSVY-CMRPAFK--GSAPINLSDRLHQVLRWALGSVEIF
>GT2-CeS|AGE56135.1|Phycodnaviridae_Virus Acanthocystis turfacea Chlorella virus MO0605SPH;-;Cellulose synthase catalytic subunit (UDP-forming)
ILLPVCGEDLSVLQNTWSYVSKIRHNGT-LKVYVLDDSDSPDVK----ELSGFFGFHYLVRDNRHKKAGNLRSAFTKT---DGEFFVIFDADFCPRPDFLEETLGRMKAPTIAIFQTPQFFE-QRKEQNYVEKGAGAVQELFYRLIQICVGSCAVYRRAALEPFG---GTA--EVEHSEDVRTGFMATSAGYHVEY-APINLAT--GVCPTTQRAFFSQQYRWASGSTTL-
>GT2-CeS|BAB09408.1|Streptophyta_Viridiplantae Arabidopsis thaliana;CESA5;Cellulose synthase A catalytic subunit 5 [UDP-forming] (AtCesA5) (EC 2.4.1.12)
------KEPPLITANTVLSILAVDYPVDRVACYVSDDG---------------YVSREKRPGFDHKKAGAMNSLIRVSGVLNAPYLLNVDCDHINNSKALREAMCFMMDKKICYVQFPQRFD-GIDKSDR----YSNRNVVFFDINMIYVGTGCVFRRQALKEIG---WIY--G-SVTEDILTGFKMHSHGWRSVYCTPKIPAFK-GSAPINLSDRLHQVLRWALGSVEIF
>GT2-CeS|BAB10307.1|Streptophyta_Viridiplantae Arabidopsis thaliana;CESA6;Cellulose synthase A catalytic subunit 6 [UDP-forming] (AtCesA6) (EC 2.4.1.12) (AraxCelA) (Isoxaben-resistant protein 2) (Protein PROCUSTE 1) (Protein QUILL)
------KEPPLITANTVLSILAVDYPVDKVACYVSDDGVRDELPRLV------YVSREKRPGFDHKKAGAMNSLIRVSGVLNAPYLLNVDCDHINNSKALREAMCFMMDKKICYVQFPQRFD-GIDRHDR----YSNRNVVFFDINMIYVGTGCVFRRQALKEIG---WIY--G-SVTEDILTGFKMHSHGWRSVY-CTPKLAAFKGSAPINLSDRLHQVLRWALGSVEIF
>GT2-CeS|CAB37559.1|Streptophyta_Viridiplantae Arabidopsis thaliana;CSLD4;Cellulose synthase-like protein D4 (AtCslD4) (EC 2.4.1.-)
------KEPPLVTANTILSILAVDYPVEKVSCYLSDDGG------------------YVSREKRGYKAGAMN-ALVRS---NGPFILNLDCDHYIYNKAVREGMCFMMDEDICYIQFPQRFE-GIDPSDRYA----NNNTVFFDGNMVYVGTGTMFRRFALDRVG---WIY--G-SVTEDVVTGYRMHNRGWRSVYCITKRDSFR-GSAPINLTDRLHQVLRWATGSVEIF
>GT2-CeS|CAB78574.1|Streptophyta_Viridiplantae Arabidopsis thaliana;CSLB6;Cellulose synthase-like protein B6 (AtCslB6) (EC 2.4.1.-)
-FVPTADEPPIIVVNTVLSLLAVNYPANKLACYVSDDGCSP------------------------------------T---NAPYMLNVDCDMYAEPDVVRQAMCVFLQSKCAFVQFPQNFY-DSYTNELIQGPIYIGSGCFHRRVMDDGSLSSVASREAAQEVGHCHGWL--YDSVAEDTNTSIGIHLRGWTSSF-IPDPPAFL-GSTPSVGPEAIVQHRRWATGSIEVL
>GT2-CeS|CAC01704.1|Streptophyta_Viridiplantae Arabidopsis thaliana;CSLD2;Cellulose synthase-like protein D2 (AtCslD2) (EC 2.4.1.-)
VFVSTAKEPPLVTANTILSILAAEYPVEKLSCYVSDDGGALLTFEAMAE--------YVSREKRGYKAGAMNALVRMS---NGPFILNLDCDHIYNSEALREGMCFMMDDRLCYVQFPQRFE-GIDPSDRYA----NHNTVFFDVNMVYVGTGCLFRRIAL-------GWI--YGSVTEDVVTGYRMHNRGWKSVYCVTKRDAFR-GTAPINLTDRLHQVLRWATGSVEIF
>GT2-CeS|CAJ43275.1|Chordata_Metazoa Oikopleura dioica;-;Cellulose synthase
IMVPTYKEPLEVVAGTVHEVVHMDVPGLNIHVYVLDDGRRQHLEELARRTKKYVYLHYVARPKPHAKAGNINHTLHRT---EGEAVVIFDADFMPRRNYLWRVLPVFSERAIGLVQTPQFFY-NVNSDE---DVWDHLNVSFFHRIENCCGTNFTVRADALKDVG---YFP--VGCLTEDTLLSLRLCTMGWAVSY-HHEVLAI--GQSPHEIIEVFKQRSRWCKGNLQIF
>GT2-CeS|CBY11816.1|Chordata_Metazoa Oikopleura dioica;-;Protein kinase domain-containing protein
VMIPTYNEPLEVVAGTLHEVMHMDVPALHLHIYVLDDGKRGNLEEYILGRRTKKYVHYIARQKPHAKAGNINHTLRFVYDRKGEAVVVFDADFMPRRNYLWRVLPVFSERPIGLVQTPQFFY-NVNADE---DVWDHLNVSFFHRIENCCGTNFTVRADALKSVG---YFP--VGCLTEDTLLSLRLCTEGWAVSY-HHEVLAI--GQSPHEITEIFKQRSRWCKGNLQIF
>GT2-CeS|EWM25045.1|Stramenopiles_Protista Nannochloropsis gaditana;-;Cellulose synthase
VMIPCYNEPVEIVRETTLAALAMDYPKEKLSIVVCDDGNSAAMRALIAQLGSKATLRYIARKKPHAKAGNINNALEGT---SGDFIVIFDCDMICRPEFLQCVLPHFYKEEVAMVQTPQSFV-NVPEDDPLGQ----QYRYFYGPVLPCCGTNVTFSRKALMSVG---GFT--YGSITEDFLTSMTLHSHGFRTKY-IHEYLAK--GLSPESVHDFMKQRFRWAAGGLEIF
>GT2-CeS|KHO47669.1|Archaea_Archaea Archaeon GW2011_AR5;-;Glycosyltransferase
IQIPTFNEPVAI--RCAEHCLKMDYPKSKFEIIIGDDSSDGNVSAMINDFARKHRIKVTRRGTNGFKAGNINNMLRYS---KGEIIVIFDSDFVPPADFLKRIVRPF-DPKVACVQSKWSYI-NME--QSPTSKFASTVLMVYHNILLLFGSGEAVRKNVIEKLG---GWQ--EGSVTEDVEFSVRALIKGYKTVY-LHDLSVQ--GEVPYNVRSLRTQQRRWAYGNTKAF
>GT2-CeS|NP_180820.2|Streptophyta_Viridiplantae Arabidopsis thaliana;CSLB1;Cellulose synthase-like protein B1 (AtCslB1) (EC 2.4.1.-)
-FVPTADEPPIMVVDTVLSLLAVNYPANKLACYVSDDGCSP-------------------------------------------------------------------------------------------------------------------------------GWL--YDSVAEDLNTSIGIHSRGWTSSY-IDTPAFL--GSMPAGVPEALLQQRRWATGWIEIL
>GT2-CeS|NP_193264.3|Streptophyta_Viridiplantae Arabidopsis thaliana;CSLB5;Cellulose synthase-like protein B5 (AtCslB5) (EC 2.4.1.-)
-FVPTADESPIITVNTVLSLLAVNYPANKLACYVSDDGCSP-------------HLVYISREKRHYKTGAMNFLLRMT---NAPYTLNVDCDMYAEPDVVRQAMCVFLQSKCAFVQFPQKFY-DSYTNELLGRGVAGIQGPFYRRVMQFLAEDSLVRKEAAQEVGHCHGWM--YDSVAEDINTSVGIHLRGWTSSF-IPDPPAF--IGSTPTLGEAIVQQRRWATGAIEVL
>GT2-CeS|NP_194130.3|Streptophyta_Viridiplantae Arabidopsis thaliana;CSLG3;Cellulose synthase-like protein G3 (AtCslG3) (EC 2.4.1.-)
VFICTYKEPPMMVVNTALSVMAYEYPSDKISVYVSDDGGS-----------------YVSREKSHFKAGALNTLLRMT---NSPIILTLDCDMTPVRAL------CYLTPKIGFVQFPQTFQ-GISKNDIY---ACAYKRLF-EINMNHVGTGCFFNRRILPEIDELKGFR--YGSLVEDYYTGYRLHCEGWRSVF-CRPKRAC--GDSPKSLIDVVSQQKRWAIGLLEVA
>GT2-CeS|WP_009988934.1|Crenarchaeota_Archaea Saccharolobus solfataricus;-;Glycosyltransferase family 2 (Glycosyltransferase family 2 protein) (Orf c04008 protein)
IIVPTKGERIEVIQGLIDNIHEAIWDRNKLEIIIVSDDEQEYFDKLLSTLIIDLDVRIFRREKKGYKSGALAFGLQKS---TGDLILTLDVDARIEKDSLIKAYNHMVNGCDAITMEWHGYS-NI--STSLAKALMVSTVLTSKSILLPIGCGTIYKRSALEAVN---GWD--YKMIQDDYELGARLINKGFKVCA-SSSPVYV---EVPDNLIAFYVQQTRWAMGTMEVL
>GT2-CeS|WP_012908213.1|Proteobacteria_Bacteria Citrobacter rodentium;-;Cellulose synthase catalytic subunit [UDP-forming] (EC 2.4.1.12)
IFVPTYNEDLHVVKNTIYASLGIDWPKDKLNIWILDDGGREEFRQFAQNVGV----HYIARTTHHAKAGNINNALKYA---KGEFVSIFDCDHVPTRSFLQMTMGWFLKKKLAMMQTPHHFF-SPDPFERNFRKTPNEGTLFYGLVQFFCGSCAVIRRKPLDEIG---GIA--VETVTEDAHTSLRLHRRGYTSAY-MRIPQAA--GLAPESLSAHIGQRIRWARGMVQIF
>GT2-CeS|XP_001259116.1|Ascomycota_Fungi Neosartorya fischeri;-;Glycosyl transferase, putative
VFVTCCGEDDEVVLDTVRGACDQDYPRDRFRVIVLDDGKSATLEASVRQLAITYMAREKIPGKPHFKAGNLNYGLEQV---HGQFMAALDADMIPEQDWLRAVLPHLLVPKMALACPPQLFY-NTPPSDPLAQSL----DFFVHVIEWCTGSGYVVRREALDEIG---NFP--LGSLAEDVATSTMMLGKGWKTAY-IHEPLQF--GTVPEDFGGHLKQRTRWAIGTVDTA
>GT2-CeS|XP_002149055.1|Ascomycota_Fungi Talaromyces marneffei;-;Integral peroxisomal membrane protein
IVLPCCNEPLDVLQDTILGVLGVDYPHDKYRVVVADDGASRELQDWVASLKCQRYYHARKKPTIDYKAGNLNQAIDFMSTFPAEYIASLDADMIPEKRWLRAVMPHMVLSRLGMVCPSQSYY-HTPHNDLLIQNGRSCWNVDSVYRS---GSGFVLRREAILEIG---GFP--APSLLEDTYSSVLMMSKGWRTKY-ISEALQY--GLVPESYVASVKQFVRWRVGGVQLA
>GT2-CeS|XP_005647069.1|Chlorophyta_Viridiplantae Coccomyxa subellipsoidea;-;Six-hairpin glycosidase
VLVPCYKEPMEITARTVQAAYNAKLPAGDLTIYLCDDGKDPQKRKWCEQMGPEYVSGRMRKAGENGKSANLNNCLSHI---YPEITCIFDADQVANPDFFLKTLPLFDADDVGMVLSPQAFH-NLNPS---ADIFNHGNIQFWEYAQSCTGTNFLTRSLAFEQAG---WSP--EYTLTEDYALGMELRKRKWKCRY-VEEYLAV--GEAPEQVRNCFQQRSRWAKGHFQI-
>GT2-CeS|XP_008864923.1|Stramenopiles_Protista Aphanomyces invadans;-;PH domain-containing protein
VFICHYSEPAEETIDTLAACMNLQYPPHLLQIYILDDG-----RADCAAGSFRDDYRYRVKPPTYSKAGNINNACFNA---NGRYLVILDNDMQPHPKFILATLPFFFDNAVAFVQTPQYFR-DCVQFQ-IGDPLGHRNATFYDAIQSFAGTNAIFRREALDSIG---GIQ--YGSLTEDCYTGQQLCAMGWKGLY-FRIRLAE--GLIPDNVASSLAQRKRWAKGNFQI-
>GT2-CeS|XP_010546378.1|Streptophyta_Viridiplantae Tarenaya hassleriana;-;PREDICTED: cellulose synthase A catalytic subunit 6
------KEPPLITANTVLSILAVDYPVDKVACYVSDDGARDVENNELPPL--VYVSREKRPGFDHKKAGAMNSLIRVSGVLNAPYLLNVDCDHINNSKALREAMCFMMDKKICYVQFPQRFD-GIDRHDR----YSNRNVVFFDINMIYVGTGCVFRRQALKEIG---WIY--G-SVTEDILTGFKMHCHGWRSVYCIPKRPAFK-GSAPINLSDRLHQVLRWALGSVEIF
>GT2-Chitin-HAS|AAA34491.1|Ascomycota_Fungi Saccharomyces cerevisiae;CHS1;Chitin synthase 1 (EC 2.4.1.16) (Chitin-UDP acetyl-glucosaminyl transferase 1)
--VTMYNEDHILLGRTLKGIMDNVKYM---VKKKNGPDA----------WKKIVVCIGRSKINENQKKINSHRWAFEGFAERPNIVTLLDAGTMPGKDSIYQLWREF-RPNVGGACGEIRTD-LGKLNPLVASQNFEYKMSNILDKTVLPGAFSAYRFEAVRQPLQKY--FSSNMYLAEDRILCFEVVTKKNCNWILCRSSYAS--TDVPERVPEFILQRRRWLNGSFF-A
>GT2-Chitin-HAS|AAA34493.1|Ascomycota_Fungi Saccharomyces cerevisiae;CHS2;Chitin synthase 2 (EC 2.4.1.16) (Chitin-UDP acetyl-glucosaminyl transferase 2)
ICITMYNEDKYSLARTIHSIMKNVAHL---CKREKGPNG----------WKKVSVILGRAKV--NQGSLDTQVSILDYVSKQLVFCLLVDVGTRLNNTAIYRLWKVFDMSNVAGAAGQIKTM-KGKFNPLVASQNFEYKISNILDKPVLPGALSAYRYRALKHEDGTGDVFTANMYLAEDRILCWELVAKRDAKWVLVKEATGE--TDVPEDVSEFISQRRRWLNGAMF-A
>GT2-Chitin-HAS|AAF51798.3|Arthropoda_Metazoa Drosophila melanogaster;-;Chitin synthase 2, isoform D (EC 2.4.1.16)
VCATMWHETEDEMMEFLKSIVRLDEDQ---CARRMADDE----------YYELETNIDAFKI--RHKKRWSQVMYMYYLLGTNTFILALDGDIDFQPRAVRLLIDRMKADELGAACGRIHPV-GR--GPMVWYQRFEYAIGHWLQKACSPGCFSLFRASALMNSVMKRAMKMVQYDQGEDRWLCTLLLKAGSRVE--CAASDAY--THAPESFNEFYNQRRRWVPSTIA-N
>GT2-Chitin-HAS|AAS65101.1|Arthropoda_Metazoa Drosophila melanogaster;-;Krotzkopf verkehrt, isoform A (Krotzkopf verkehrt, isoform C) (EC 2.4.1.16)
-CATMWHETKDEMIEFLKSIMRMDEDQ---CARRVLDPD----------YYEFETHIDAFRI--RHRKRWSQVMYMYYLLGENTYLLTLDGDIDFKPNAVTLLVDLMKKKNLGAACGRIHPV-GS--GPMVWYQLFEYAIGHWLQKACSPGCFSLFRGKALMDNVMKKARHYVQYDQGEDRWLCTLLLQRGYRVE--SAASDAY--THCPEGFNEFYNQRRRWVPSTIA-N
>GT2-Chitin-HAS|AAX62733.1|Nematoda_Metazoa Caenorhabditis elegans;CHS2;Chitin synthase chs-2 (EC 2.4.1.16) (Chitin-UDP acetyl-glucosaminyl transferase chs-2)
-CATMWHETGVEMTCMLKSLFRMDEDQ---CAR--RNPD----------YYEFEAHIDAYKI--RHRKRWSQVMYLYYLLGKNTFILTLDGDVDFTPSSVYLLVDLMKKRRLGAACGRIHPR-GD--GAMVWYQKFEYAIGHWLQKACSPGCFSLFRAYALMDNVARRPKHFIQYDQGEDRWLCTLLLQRGYRVE--CAASDAQ--TFAPEGFNEFFNQRRRWIPSTIF-N
>GT2-Chitin-HAS|ADX66428.1|Arthropoda_Metazoa Helicoverpa zea;-;Chitin synthase A variant 1
-CATMWHETKDEMMEFLKSILRLDEDQ---CARRVVDPD----------YYEFETHIDAFKI--RHRKRWSQVMYMYYLLGENTYLLTLDGDIDFQPHAVRLLIDLMKKKNLGAACGRIHPV-GS--GPMVWYQMFEYAIGHWLQKACSPGCFSLFRGKALMDNVMKKARHYVQYDQGEDRWLCTLLLQRGYRVE--SAASDAY--THCPEGFNEFYNQRRRWVPSTIA-N
>GT2-Chitin-HAS|AFI90614.1|Proteobacteria_Bacteria Pectobacterium parmentieri;-;Chitin synthase 1
VCLTLYNEPAPMLADTLAGLVRNQQEL---TAT--FANR----------PPNIIICIG---H--NAGKLDSHAWFFWGVGRKAEFAMQIDTGSVTESACLVQLLQHMWRPHCGAVTTRVMLP-VP--TNANLSQNWQYADFIWEKVAVVPGQCSMIRWSQFCNHGHAHSLLERNLFLAEDRVLGFELTKHHKGSGVREQGAIVR--SDPAPTFIELLRQRRRWVNSTLA-A
>GT2-Chitin-HAS|AGE59900.1|Phycodnaviridae_Virus Acanthocystis turfacea Chlorella virus TN603.4.2;-;Chitin synthase
--VTAYNETLEELDRTIKSVTEQKEKT---LAK--NLRK----------LKYDEHVVAIKSN--NAGKRDSHAMKISGELEKVTRMVGIDADTVFHQECTQALLEEMNGRPVDGVVGYIDIDTSPYQKMWIWFQSVGYVIGQHVMRVCLSGACYGIYIPTMCPELLK-LFHSILGYASEDRRSVVLALCR--DRNVRRQAAIAY--TIPPDSFTVFLSQRRRWSLGTLC-N
>GT2-Chitin-HAS|CAA53680.1|Ascomycota_Fungi Saccharomyces cerevisiae;CHS3;Chitin synthase 3 (EC 2.4.1.16) (Chitin-UDP acetyl-glucosaminyl transferase 3) (Class-IV chitin synthase 3)
CFVTCYSEDEEGLRTTLDSLSTTDYP-----------------------NSHKLLMVGLIKG--NRGKRDSQIILMSFLEKFYETVLMVDADTKVFPDALTHMVAEMVKPLIMGLCGETKIA-NKAQSWVTAIQVFEYYISHHQAKACLPGCFSMYRIKSPKSDGYWVLHKKNLLLLGEDRFLSSLMLKTFPKRKQVVPKAACK--TIAPDKFKVLLSQRRRWINSTVH-N
>GT2-Chitin-HAS|CAA96688.2|Nematoda_Metazoa Caenorhabditis elegans;CHS1;Chitin synthase chs-1 (EC 2.4.1.16) (Chitin-UDP acetyl-glucosaminyl transferase chs-1)
-CATMWHETETEMRQVLRSILKLDVDH---ATRMNANEL----------RYRLEGHIDAWEI--RHKKRWSQVMYMYYLLGDNTFILAIDGDSKFEPDALLRLLHLMNASDIGCACGRIHPI-GN--GIMVWYQKFEYAIAHWFQKACAPGCFSLFRASALMDNIM--PRHYVQYDQGEDRWLSTLLLKQGYRIE--AAASDAE--TYAPEGFEEFFNQRRRWTPSSIA-N
>GT2-Chitin-HAS|CEP01507.1|Rhizaria_Protista Plasmodiophora brassicae;-;Uncharacterized protein
VVVTMYNESSAELHLTLRGIANNIRFM---CKK--LGDY----------WKNVTVTIGRDRI--NQGKIASHWWFFEGICHQPEYCYLLDVGTKPRRAAFYAYLRQFKRPDMAGACGQITTR-KNFLNPIVASQHFEYKIASVLDKAVLPGAFSAYRFSAVQAPLEAYEPFHTNMMLAEDRILCYELIAKKDCSHTLVNSAIAE--TDVPCDIGRLLKQRRRWLNGSFF-A
>GT2-Chitin-HAS|KDD74358.1|Chlorophyta_Viridiplantae Helicosporidium sp. ATCC 50920;-;Chitin synthase (Fragment)
-------ETAVGLPTSVHLFEYTARFK---KHA--GLDC----------YPPLQVLFAT-----NRGKLDSHCWFFDGFAHQPEYCVLFDAGTRPLPMALRNCYAHFRNPWCGALTGELRVE-RPYRNFLTSVQYMEWKVAHFLSKPVLPGAFSAFRWSAVEEPLRRYSAFEANMYLAEDRVLCLEIVARKNARFYLVKEAVAE--ADPVTKLAGLIKQRRRWLNGTFF-A
>GT2-Chitin-HAS|XP_002592732.1|Chordata_Metazoa Branchiostoma floridae;-;Uncharacterized protein
ICTTMYRETWDEMSKYLDSIKRVATSD---LDKLVNNRW----------AGKFEVCLDNQNV--KSKKRWSQVMYMESAVDRVKYILATDGDVDFDAGSIVAMLLQMDRGQVGAVCARTHPV-GS--GPFVWYQMFDYAIGHWLQKVCAPGCFTVYRVEAIKVLEEY-ASDFLTKDMGEDRWFTTLLVKAGYKIN--CAGAVDS--THCPEEFDEFWKQRRRWIPSTLA-N
>GT2-Chitin-HAS|XP_003712190.1|Ascomycota_Fungi Magnaporthe oryzae;-;Chitin synthase (EC 2.4.1.16)
IVVTMYNEDEVLFARTMIGVFKNIEYM---CKRPEGKEA----------WKKIVVCIGRAKINPNQKKINSHRWFFSAFGRNPNICVLLDAGTKPGGNSIYHLWKAFDLPMCAGACGEIKAM-LGTFNPLVAAQNFEYKMSNILDKPVLPGAFSAYRYIALQDKNGQGGIFTANMYLAEDRILCFELVTKRNCHWILVKSATGE--TDVPDTATELILQRRRWLNGSFF-A
>GT2-Chitin-HAS|XP_005842856.1|Chlorophyta_Viridiplantae Chlorella variabilis;-;Chitin_synth_1N domain-containing protein
ICVTLYNEDYDELRKTLVGICDNLEVM---YDR--RGVD----------WTEVAVCIGIGNANENKGKLDSHCWYFDAFCYQPEYCVLFDAGTKPLPAALKSVATHFQRPTVGALTGELTVQ-RPYRTFLTAVQFCEWKVSHLMQKPVLPGAFCAFRWAAVEEPLRKYNAFEANMFLAEDRILCIEVVAKKGANYRLIKEAVAE--ADAVTKLTGLMKQRRRWLNGTFF-A
>GT2-Chitin-HAS|XP_008613289.1|Stramenopiles_Protista Saprolegnia diclina;-;Uncharacterized protein
VVITMYNEDQVEMYSTLKKVANNIAHI---KSQKLGDDA----------WKNILVVIGRTKH--NGGKLNSHEWYFNAFAEQPEYTVLLDVGTMPTAKAFYLLLCAMEIPQIGGTCGEIAVD-KPIPNWVIAAQHFEYKISNVMDKSVLPGAFSAYRYKAIRAPLEAYGPFQGNMYLAEDRILCFELLARRNCRWTMVKDAIAR--TDVPTDLVALIGQRRRWLNGSFF-A
>GT2-Chitin-HAS|XP_009291791.1|Chordata_Metazoa Danio rerio;-;uncharacterized protein si:ch211-264e16.2 isoform X1
-CATMWHETYDEMMKIIISMFRLDAYR---PKT--GKHS----------DIEFEFHVDAFKI--RHKKRWSQIMYLYYILGQNTYILALDGDTDFQPSAVMLLIDRLKLPEVGAACGRIHPT-G--TGPMVWYQKFEYAVGHWLQKTCSPGCFSLFRGAALVDNVMKRASHYVQYDQGEDRWLCTLLLQQGWRVE--NAASDAY--TNAPQDFKEFYNQRRRWGPSTMA-N
>GT2-Chitin-HAS|XP_011426422.1|Mollusca_Metazoa Crassostrea gigas;-;PREDICTED: chitin synthase 1
-CATMWHETEQEMRTLLRSIFRLNEHQFETNKQ--PDET----------YFQFEAHIDAFKE--NKEKI--------------TFILALDGDVDFKPDAVHRLLERMLKDEVGAACGRIIPM-G--TGPVVWYQKFEYAVSHWLQKACSPGCFSLFRASALMDDVIKIALECIQFDQGEDRWLSTLLLKQGFKLE--TAASDAY--TYVPEGFFEFFNQRRRWSPSTLA-N
>GT2-Chitin-HAS|YP_001497668.1|Phycodnaviridae_Virus Paramecium bursaria Chlorella virus NY2A;-;Uncharacterized protein B472R
--VTAYRETKEELDRTVESITTQVDGE---KET--AQEL----------RKYNETCVAIKSE--NAGKRDSHAMKISGELDKVTRMIGIDADTIFHEECSQALLEEMNGRPVDGVVGYIDIM-GKNKSPWIWFQGVGYVIGQHVMRVCLSGACYGIYVPTMCPELLKE-FLSILGYASEDRRSVVLALCR--DRNVRRQAAIAY--TVPPDNFTVFISQRRRWSLGTVC-N
>GT2-CWR|ABO07903.1|Crenarchaeota_Archaea Pyrobaculum calidifontis;-;Glycosyl transferase, family 2
VIVPTYNEA-PLIEEKLDNIYEQDYPRDKLEVVVVDSASTDGTPSAVRRWADLLTLVEETER--RGKAHALNTALRHA---TGEIVVITDADALWARDTLANAVKWLADPTVGAVSCVKRPA-GPAGV---EDSYRDFYNVLRVAESIFHGELAAFKRELLEGFP--------TDVGADDSHTATKIAMMGYRAIT-PPDVVCV--EAVPK--RGYHAWRIRRAQHLVQ-H
>GT2-CWR|EXL72957.1|Ascomycota_Fungi Fusarium oxysporum f. sp. conglutinans race 2 54008;-;Glyco_trans_2-like domain-containing protein
IVIPVYNES-EFVKNSIKSIELSDYPKDRIELIVIDDGSTDDTWEHVNKAAGSLRLLQHAVN--MGKRKAIQSGFATA---LGSIIISLDSDSVVEKGALRNIVSPLRDPSIGAVAGHLAVL-NISSHSILDIVFDHIGNLPRSALSILPGAFSAFRADAVQSHI--------DRLCAEDMELAYRILCDGWRTVY-----------------------------------
>GT2-CWR|WP_007387570.1|Actinobacteria_Bacteria Streptomyces coelicoflavus ZG0656;-;Bi-functional transferase/deacetylase
VIVPAYNEK-ECIEATLRSLARSTHP---IEIIVVDDGSTDGTAEIAESLGLPVRVVRQ-AN--AGKPAALNNGVRHA---RYDIVVMMDGDTVFEPDTVRHLVQPFADPSVGAVAGNAKVG-NRRTLIGAWQHYVMGFNLDRRMYDTIPGAIGAFRREAVGGMS--------DDTLAEDTDITIALHRAGWRVVY-EEHARAW--TEAPGSLGQLWSQRYRWSYGTMQ-A
>GT2-CWR|WP_008894090.1|Euryarchaeota_Archaea Haloterrigena salina JCM 13891;-;Family 2 glycosyl transferase
IVLPTYNEA-AIVESKLEELVELDYPMEKVEIVVV-DSSDDGTAELVETFPEPLTLIREDER--RGLATALNDAYAAA---ENEVVVKTDCDSRLAPDAVRKAVANLADPDVEAVTGRN--A-DVIGGSEVEQSYRDIQTMIQILESIFHGPFSAFERDAIVPID--------EDSIADDSELALKIRRNGGRAVF-DPEIHYK--EAAHSEFGKRREQKDRRAMGLLR--
>GT2-CWR|AEE93935.1|Crenarchaeota_Archaea Acidianus hospitalis;-;Glycosyl transferase family 2
LIIPAKNEE-KVLGRLLDRLENQEYDRSKYEIIVVEDGSTDKTLEVCNSYMDNISCIHLESSRINGKSRALNYALRIA---KGEIIGIFDADTVPRLDTLAYASAKFE-PKVAGVQGRLVPI-NVRESAIARFASLE-ELFYEYSISPLEGTCSFIRKSVLESLG---GWN--ESSLTEDLDLSLKIISSGYKIIY-SPSVAWR--EVPVS-LRMLIKQRLRWYRGHFEV-
>GT2-CWR|EST07847.1|Basidiomycota_Fungi Kalmanozyma brasiliensis;-;Glycosyl transferase
VLVALPNEQ-EIIMRQVKALRELNYPANRMTINVCIEPVETELRDLAKE-RSNLRIVKVPKS--TSKADNINHFLTLS---KGEIITLYDTDHYPEPDALRWVAKRFMQVDI--IQGRCCIY-NYSETFMTRLIASEFDLIYGVMHSFFGGSNGHWNASLLRTLG----MQ--KHMLTEDIDSSMRAIISGARIEYDLKVLSYE--LAPET-LPALVKQRLRWAQGWTQV-
>GT2-CWR|KFZ17480.1|Ascomycota_Fungi Pseudogymnoascus sp. VKM F-4520;-;Uncharacterized protein
VLVPVYRES-EVMPELIKAMKRLDYPSEKLEIMFLVEEHDQETREAALSACPNMRIVDLPPGNPQTKPRSCNLGLLLA---RGDLIVIFDAEDRPDPDQLIKAAKAFAGNRLACVQAKLFFY-NAKQNMLTHQFALEYALRYGMILPPLGGTSNHFRTDILRRLG---GWD--AWNVTEDADLGMRCQALGYRVNM-IESITWE--EATSQ-PGAWIKQRTRWLKGFMITR
>GT2-CWR|KOO28466.1|Haptophyceae_Protista Chrysochromulina sp. CCMP291;-;Glycosyl transferase
VLVPCYNEQ-HILKGTVTHIENLEYPEPFL--LILCYAAEQELLPALEATPNGRTLRVLKVEGSHSKAENLNACLPLI---TTETLVIYDADHHPDPPSLMFAAEMMRRCH--CVQGS-TYL-RYKPTLLAKILDAEFFVIFFCFFP-FGGSNALWKTETLRKYM---F----RHDVTEDIELSVRVLLGDIKIRF-CESRSGE--LPPKS-FKALWRQRLRWEIGWDQVR
>GT2-CWR|WP_011450127.1|Euryarchaeota_Archaea Methanospirillum hungatei JF-1;-;Glycosyl transferase, family 2
VLVPLFHEQ-EMLPHILQNIANINYPRDKLDVKILMEEEDTETIEKARKLFSIFHPVVIPKADITTKPRACNYGLKRS---RGEFVVIYDAEDLPDRDQLKKVVIAFQRPKYACVQCLLNFY-NPRKNMLTRWFSIEYSYYYDFYIQPLGGTSNHFRMKTLRELG---AWD--PYNVTEDADLGMRIARKKLHTAV-LNSHTYE--EAVTR-VPSWIRQRSRWVKGFVITR
>GT2-CWR|WP_024939104.1|Proteobacteria_Bacteria Xanthomonas arboricola pv. corylina;-;Glycosyltransferase
VLVPMYKEP-EVLPILANALRKLDYPISKLDVKLVLEADDFDTIEAAKKLEAFFEIIRVPPSQPKTKPKACNYALHFA---RGELLTIYDAEDKPEPDQLKRVVAAFRKKDVACIQARLNYY-NADENWLTRMFTLEYTLWFDFYLPPLGGTSNHFRLDVLRQVR---AWD--PYNVTEDADLGVRLIQNGYRVNV-VNSTTFE--EANVS-IPNWIRQRSRWLKGYMQTR
>GT2-CWR|WP_052036986.1|Proteobacteria_Bacteria Rhodomicrobium udaipurense;-;glycosyltransferase
VLVPLYRET-AILPHLAHALASLDYPAAKLDIKIVLEASDRDTIEAAQKLPGNVDLVVVPDREPRTKPKALNYALHFA---SGEFVVIYDAEDRPEPDQLRKAATVFAQADLVCLQARLDYY-NARENWLSRQFTIEYATLFRGLLPPLGGTSNHFRAAALREIG---AWD--PYNVTEDADLGMRLARAGYRTGT-LESTTWE--EACCR-PMPWLKQRTRWLKGWMQTR
>GT2-CWR|WP_052207813.1|Proteobacteria_Bacteria Porphyrobacter mercurialis;-;glycosyl transferase family protein
VFIPAWLEH-EVITDTIATTLKA-WPQDALRLYVGCYCNDPRTVEAIRGTDPRVRLVVHERAGPTTKADCLN-RLYTAMEHRGGYVVLHDAEDMVDPAGL----ALLDRAEAEFVQLPLPEP-QARSRWVGSHYCEEFAEAHGKAMVPSAGVGCAFSRTMLARIA---GTG--PFSVTEDYELGLRIKAAGGRSRF-LRIATRA--CFPAK-LDQSVRQKARWVHGILQG-
>GT2-DPs|AAD14758.1|Nematoda_Metazoa Caenorhabditis elegans;-;Asparagine Linked Glycosylation (ALG) homolog, Nematode
VIIPAMNEV-ERIEIMLDDCCDYLEARKDYEIIVVDDGSTDETADIGARR-QNLRVL--KMKANRGKGGAVKMGVLHS---SGKLILFADADGATKFADFENLEKELDESFPAVIVASRAHLEAESMAVRSVPRTILMLGFHLLVYTTQCG-FKLFTRSIAARIF---PVLH-IERWAFDVELIFLCERWTVPVKE-VSVRW-T--EI---------------EGS----K
>GT2-DPs|AAD41465.1|Chordata_Metazoa Homo sapiens;ALG5;Dolichyl-phosphate beta-glucosyltransferase (DolP-glucosyltransferase) (EC 2.4.1.117) (Asparagine-linked glycosylation protein 5 homolog)
VVVPSYNEE-KRLPVMMDEALSYLEKRPAYEVIVVDDGSKDQTSKVCQKYGSDVRVI--TLVKNRGKGGAIRMGIFSS---RGEKILMADADGATKFPDVEKLEKGLWPNQMAIACGSRAHLEKESIAQRSYFRTLLMYGFHFLVWFTQCG-FKLFTREAASRTF---SSLH-VERWAFDVELLYIAQFFKIPIAE-IAVNW-T--EI---------------EGS----K
>GT2-DPs|AAF52633.1|Arthropoda_Metazoa Drosophila melanogaster;ALG5;Dolichyl-phosphate beta-glucosyltransferase (EC 2.4.1.117) (Wollknaeuel)
VIVPAYNEE-QRLPSMLDECLAFLEQKPNYEVIVVSDGSQDATVSVSKKHGAEVRVL--ELIENRGKGGAVRMGMLSA---RGRNLLFADADGATKFPDYDKLEVALKQRDDGIAIGSRAHLENDAIATRSFFRTILMHGFHFLVWLTQCG-FKLFTRTTARKLF---TSLH-VERWAFDVELLYLAENLKLPMSE-VAVRW-T--EI---------------DGS----K
>GT2-DPs|AAL07006.1|Streptophyta_Viridiplantae Arabidopsis thaliana;-;At2g39630/F12L6.29 (Glycosyltransferase) (Nucleotide-diphospho-sugar transferases superfamily protein) (Putative dolichyl-phosphate beta-glucosyltransferase)
LIVPAYNEE-LRLPAALEETMDYLQDRKSFEVVIVDDGSVDGTKRVIRKYTIDIRVI--PLGKNQGKGEAIRKGMLHS---RGQLLLMLDADGATKVTDLEKLENQIAREEYSIAFGSRAHLEEKALATRKWYRNFLMKGFHLVVLLTQCG-FKMFTRAAARRLF---TNVH-LKRWCFDVELVYLCKRFNIPMVE-ISVKW-S--EI---------------PGS----K
>GT2-DPs|CAA54680.1|Ascomycota_Fungi Saccharomyces cerevisiae;ALG5;Dolichyl-phosphate beta-glucosyltransferase (DolP-glucosyltransferase) (EC 2.4.1.117) (Asparagine-linked glycosylation protein 5)
VVIPSYNET-GRILLMLTDAISFLKEKYGWEIVIVDDGSTDNTTQYCKEQFEQFRII--KFSQNRGKGGAVRQGFLHI---RGKYGLFADADGASKFSDVEKLIDAIKTTKPAVAIGSRAHMVNTEVIKRSMIRNCLMYGFHTLVFITQCG-FKLFNRAAILKIF---PYLH-TEGWIFDVEILILAIRKRIQIEE-IPISW-H--EV---------------DGS----K
>GT2-DPs|CDW76599.1|Alveolata_Protista Stylonychia lemnae;-;Dolichyl-phosphate beta-glucosyltransferase-like
IVVPAYNEE-SRLPTMMTETLEYLEGKLLVEIVIVNDGSKDKTMNLTKKYPTNIRGV--NQVQNQGKGSAVKQGCLYS---RGKLILFTDADGATDIRGLDTVLNEISKNNLGCAIGSR--KEENATVERNALRQFLSWGMHTAVQLTQCG-FKIFTRDAAKLVF---PTQH-LERWSFDVEVLYLCGQHGVPVRE-VGVVW-H--EV---------------DGS-----
>GT2-DPs|ETO61073.1|Stramenopiles_Protista Phytophthora parasitica P1976;-;Glyco_trans_2-like domain-containing protein
VVIPAYNEE-QRILVTIKDTVAFLDEKKSYEIIIVDDCSTDRTVDVVQEYSERIRLL--KLQKNHGKGGAIRKGIMRA---RGQQILFADADNATEIRDFDKLATAMDNPNGVVVCGSRAHLEEEAIAKRNPLRNLLMHGFHLIVSTTQCG-FKLFDRTAARVLF---APMH-IERWAFDVELLYLAASSKMAIKE-VAVQW-T--EV---------------PGS----K
>GT2-DPs|WP_004972645.1|Euryarchaeota_Archaea Haloferax gibbonsii;-;Glycosyltransferase AglD
VVLPAYNEA-RTIENTVRVTVETLESFPAFEVIVAEDGCDDETPEIAAE-DDRIRHY--HSDARLGRGGALERAFEAA---RGDTLVYFDTDLATDMRHLEELVERVRSGEYDAATGSRWMP--DRVADRPRKRGVPSRAYNGLVRLHQCG-FKAFSREAFEALR---DDVE-DNHWFWDTEMLVRAQRAGFRVAE-FPVDW-E--PK---------------GDT----K
>GT2-DPs|WP_015896755.1|Acidobacteria_Bacteria Acidobacterium capsulatum;-;Glycosyl transferase, group 2 family
IVIPAYNES-ARIGHALDEVLACVAARQWAEVLVVNDGSSDQTAEIARQHPEL-RLI--ENDGNRGKGYSVRHGMLKA---RGEIVMFTDADLSAPIIEAESLMAAIQ-GGADVAIGSRWLDRSRQTMHQPLYRRFFGRCFNGVTRLTQCG-FKAFRRSVAHTIF---QLQR-IERWGFDPELLFIALKRGYRVVE-VPVTW-G--HD---------------ERT----R
>GT2-DPs|WP_051842182.1|Actinobacteria_Bacteria Streptomyces sp. NRRL F-5193;-;bifunctional glycosyltransferase family 2/GtrA family protein
VVIPVYNEE-KDLEPCVRRLHAHLERTFPFRVTVADNASTDATPDIAAELPE-VRSV--RLEQ-KGRGRALRTVWSAS---DAPVLAYMDVDLSTDLNALLPLVAPLISGHSDLAIGSRLARSSRVV--RGPKREFISRAYNLILRGAQCG-FKAIRRDVAERLL---PMVE-DTGWFFDTEMLVLAERAGLRIHE-VPVDW-V--DD---------------PDS-----
>GT2-DPs|XP_002482081.1|Ascomycota_Fungi Talaromyces stipitatus;-;Dolichyl-phosphate beta-glucosyltransferase, putative
VVVPAYNEE-ERLVGMLEETVEYLEHAYGWEILLVSDGSTDRTEEVARDHPGSIRIV--TLTQNRGKGGAVTHGMRHV---RGKYVVFADADGASKFSDLGKLVEAEDSEGRAVAVGSRAHMGSEAVVKRSKLRNFLMHSFHLILWLTQCG-FKLFSRASLPYIV---PYMH-SEGWIFDVEMLMLAEFAGIPVAE-VAVGW-R--EV---------------KGS----K
>GT2-DPs|XP_002952253.1|Chlorophyta_Viridiplantae Volvox carteri f. nagariensis;-;Glyco_trans_2-like domain-containing protein
-IIPAYNEE-DRLPSTLDEALAYLQRRPQYELIIVDDGSKDGTARVVRKYGMDVRLL--RVSANRGKGHAVKRGMLAA---RGEYCLLMDADGATRFSDLEKLEAELDKGPLGVAYGSRAHLHKDAIVKRSRLRNFLTRGFHMLVYFTQCG-FKLFTRRSAAILF---SNMR-LQRWCFDVELLYLAEQLQIPVCE-VFVNW-T--EI---------------PGS----K
>GT2-DPs|XP_002974640.1|Streptophyta_Viridiplantae Selaginella moellendorffii;-;Glyco_trans_2-like domain-containing protein
VVIPAYNEA-LRIAEPLDHTLRYLAQRAKYEVIVVDGCSKDLTPDITKRYPCL-RLI--QLDCNLGKGGAVKEGVLDS---RGELILMVDADGAVDITAFETFEPKLISENFTII-----HILIKPLYQRQWYRSILSQGFHYLTRFTQCG-FKLFTKSAAKKLF---KELS-TSRWSFDVELIMLCNVYGIPITE-VPVDF-T--DI---------------PGS----K
>GT2-DPs|XP_005317165.1|Chordata_Metazoa Ictidomys tridecemlineatus;-;Glyco_trans_2-like domain-containing protein
VVVPSYNEE-KRLPVMMDEALGYLEKRPSYEVIVVDDGSKDQTSKVCQKYGSDVRVI--TLVKNRGKGGAIRMGVFSS---RGKKILMADADGATKFPDVEKLEKGLWPDQMAIACGSRAHLEKESIAQRSYFRTLLMYGFHFLVWFTQCG-FKLLTREAASRTF---SSLH-IERWAFDVELLYIAQFFKIPIAE-IAVNW-T--EI---------------EGS----K
>GT2-DPs|XP_011157796.1|Arthropoda_Metazoa Solenopsis invicta;-;Glyco_trans_2-like domain-containing protein (Fragment)
VIVPAYNEE-QRLPPMLDECLEYLEERSKYEVIVVSDGSTDKTVDLSSKYDTL-RVL--KLVKNRGKGGAVRLGMLSA---RGSALLFADADGATKFNDLKKLDESLINVSDAIICGSRAHLEKEETVKRSFFRLLLMHGFHFLVWLTQCG-FKLLTRKSARTIF---EALH-VERWAFDVEMLYIAQTLNIPVTE-IAVNW-T--EI---------------EGS----K
>GT2-DPs|XP_012447983.1|Streptophyta_Viridiplantae Gossypium raimondii;-;Glyco_trans_2-like domain-containing protein
LIIPAYNEE-YRLPGTLNETMNYLQQRKSYEVVIVDDGSKDGTKRVVKKYGVDVRVI--LLGKNHGKGEAIRKGMLHS---RGELLLMLDADGATKVTDLEKLENQIISDIPIVAFGSRAHLEEKALATRKWYRNFLMKGFHLVVLLTQCG-FKMFTRSAARKLF---TNIR-LKRWCFDVEIVFLCKWFGIPMLE-ISVNW-S--EI---------------PGS----K
>GT2-DPs|AAA34578.1|Ascomycota_Fungi Saccharomyces cerevisiae;DPM1;Dolichol-phosphate mannosyltransferase (EC 2.4.1.83) (Dolichol-phosphate mannose synthase) (DPM synthase) (Dolichyl-phosphate beta-D-mannosyltransferase) (Mannose-P-dolichol synthase) (MPD synthase)
VIVPAYHEK-LNIKPLLFAGMSPEK----TELIFVDDNSQDGSVEEVDALAHQGYNVRIIVRTNRGLSSAVLKGFYEA---KGQYLVCMDADLQHPPETVPKLFESL--HDHAFTLGTRYAP-GVGIKDWPMYRRVISSTARMMARPPMSG-FFGLQKKYLENCNPR-DIN--SQGFKIALELLAKLRDPRVAIGE-VPFTFGV--RTEGESKLSGKVIIQY-LQQLKE-L
>GT2-DPs|AAD12857.2|Nematoda_Metazoa Caenorhabditis elegans;-;Dolichol-phosphate mannosyltransferase subunit 1 (EC 2.4.1.83)
IILPTYNEK-ENLPICIENYLKEVS----HEVIIVDDASPDGTQGIAKLLQKEYGDDKILPRVGLGLGTAYSHGLSFA---RGEFIILMDADLSHHPKFIPEMIALQHKYKLDIVTGTRYKD-GGGVSGWDLKRKTISKGANFLAQFLTGS-FRLYKRDILSKLIA--ESV--SKGYVFQMEMMFRAKKSGYRIGE-VPISFVD--RFFGESKLGSQEIVDY-AKGLLY-L
>GT2-DPs|AAF53817.1|Arthropoda_Metazoa Drosophila melanogaster;DPM1;Probable dolichol-phosphate mannosyltransferase (DPM synthase) (Dolichol-phosphate mannose synthase) (EC 2.4.1.83) (Dolichyl-phosphate beta-D-mannosyltransferase) (Mannose-P-dolichol synthase) (MPD synthase)
ILMPTYNEK-DNLPIIIVKYMKGLE----YEVIVIDDGSPDGTLDVAKDLQKIYGEDKIVLRPRLGLGTAYIHGIKHA---TGDFIVIIDADLSHHPKFIPEFIKLQQEGNYDIVSGTRYAG-NGGVFGWDFKRKLISRGANFLSQVLTGS-FRLYKKDVLEKCIA--SCV--SKGYVFQMEMLVRARQHGYTIAE-VPITFVD--RIYGTSKLGGTEIIQF-AKNLLY-L
>GT2-DPs|AAF80640.1|Streptophyta_Viridiplantae Arabidopsis thaliana;DPM1;Dolichol-phosphate mannosyltransferase subunit 1 (EC 2.4.1.83) (Dol-P-Man synthase1) (Dolichol-phosphate mannose synthase subunit 1) (DPM synthase subunit 1)
IIIPTYNER-LNIAIIIFKHLRDVD----FEIIVVDDGSPDGTQEIVKQLQQLYGEDRILLRAKLGLGTAYIHGLKHA---TGDFVVIMDADLSHHPKYLPSFIKKQLETNASIVTGTRYVK-GGGVHGWNLMRKLTSRGANVLAQTLTGS-FRLYKKSALEDVIS--SCV--SKGYVFQMEMIVRATRKGYHIEE-VPITFVD--RVFGTSKLGGSEIVEY-LKGLVY-L
>GT2-DPs|AAH07073.1|Chordata_Metazoa Homo sapiens;DPM1;Dolichol-phosphate mannosyltransferase subunit 1 (EC 2.4.1.83) (Dolichol-phosphate mannose synthase subunit 1) (DPM synthase subunit 1) (Dolichyl-phosphate beta-D-mannosyltransferase subunit 1) (Mannose-P-dolichol synthase subunit 1) (MPD synthase subunit 1)
VLLPTYNER-ENLPLILVKSFSGIN----YEIIIIDDGSPDGTRDVAEQLEKIYGSDRILPREKLGLGTAYIHGMKHA---TGNYIIIMDADLSHHPKFIPEFIRKQKEGNFDIVSGTRYKG-NGGVYGWDLKRKIISRGANFLTQILTGS-FRLYRKEVLEKLIE--KCV--SKGYVFQMEMIVRARQLNYTIGE-VPISFVD--RVYGESKLGGNEIVSF-LKGLLT-L
>GT2-DPs|CBY22073.1|Chordata_Metazoa Oikopleura dioica;-;Dolichol-phosphate mannosyltransferase subunit 1 (EC 2.4.1.83)
ILLPTYNEK-ENLPIIIDQTMTDFN----YEVIIIDDGSPDGTLEVAKQLQKIYGKIVLRPREKLGLGTAYIHGLKHA---IGEFIIIMDADLSHHPKFIPQFIKLQAENNFDIVTGSRYVD-GGGVFGWDLKRKIVSRGANLLTQILTGS-FRLYKREVLGALVQ--ACV--SKGYVFQMEMMVRARQNSFTIGE-VPITFVD--RFYGESKLGANEISGF-VKGLLY-L
>GT2-DPs|KEY72330.1|Ascomycota_Fungi Stachybotrys chartarum;-;Dolichol-phosphate mannosyltransferase subunit 1 (EC 2.4.1.83)
VILPTYNER-RNLPIILNRTFSNLD----WEIVIVDDGSPDGTQEVAKQLVKAYPHVVLKPRAGLGLGTAYVHGLQFV---TGNFVIIMDADFSHHPKFIPQMVALQRTANYDIVTGTRYAG-DGGVFGWDLKRKLVSRGANLFADTLTGS-FRLYKKSVLEKVIS--STE--SKGYSFQMEMMVRAKAMGCTVAE-VPISFVD--RLYGESKLGGDEIVEY-AKGVFS-L
>GT2-DPs|WP_014788697.1|Euryarchaeota_Archaea Thermococcus cleftensis;-;Glycosyl transferase family protein 3
VVLPTMNEE-EAISVVIREVLEGVS----YEIVVVD-KSTDRTPEIARSMGAR------VIRQERGYGDAYLTGFRHA---RGKFIVMMDPDGSYDPEDIPKLLEPLLKGEADFVMGTRLKG-EMDEKAMPWHRRIGNPLLTWILNVAHCG-MRAIRRDALERL----PLQ--CKGMEFASEMVIEAAKRGLRTVE-VPIRYHP--RI-GESKLSFRDGWRH-LRLML---
>GT2-DPs|WP_014867061.1|Euryarchaeota_Archaea Methanoculleus bourgensis;-;Dolichyl-phosphate beta-D-mannosyltransferase (EC 2.4.1.83)
IIIPLYNEE-ENVDRLIEKIAKGVT----FDFIFINDGSKDRTLEKINAIAARRDDVVVLNHEKQGMGVALKAGFAKA---SADLLITMDADLTFRPEDIPLLLEAYARDHPDCVSGSPYLQ-SGLMEEVASMRLFFSQSVNFMYRIVSPI-FRLYKAETLKKI----EIE--SENFEINAEIISKYLIAGYKIQE-VPVELHK--RRYGESKINIREVINN-LKM-----
>GT2-DPs|WP_026419779.1|Actinobacteria_Bacteria Actinoalloteichus sp. AHMU CJ021;-;Polyprenol monophosphomannose synthase
VVIPTYNER-ENLGPILHAAV--PA----AHVLVVDDGSPDGTGELADELAAADERIHVLHRTAAGLGAAYVAGFSWA---LEDVVVEMDADGSHAPEELPRLLDALGNDGADLVIGSRYVA-GGSLVNWPWHREWLSRGANIYAKLMTGG-YRAFRREVLQKILH--NVA--SQGYCFQIDLAWRAIEAGFQVVE-VPITFTD--REVGTSKMSGSIVREA-LIRVTK-W
>GT2-DPs|XP_002285933.1|Streptophyta_Viridiplantae Vitis vinifera;-;Dolichol-phosphate mannosyltransferase subunit 1 (EC 2.4.1.83)
IIVPTYNER-LNIALIIFKHLRDVD----FEIIIVDDGSPDGTQEIVKQLQQVYGEDRILLRPKLGLGTAYSHGLKHA---SGNFVVIMDADLSHHPKYLPSFIKKQLETGASIVTGTRYVK-GGGVHGWNLMRKLTSRGANVLAQTLTGS-FRLYKKSVLEEVIS--SCV--SKGYVFQMEIIVRASRKGYHIEE-VPITFVD--RLFGSSKLGGSEIVGY-LKGLAY-L
>GT2-DPs|XP_002370501.1|Apicomplexa_Protista Toxoplasma gondii ME49;-;dolichol-phosphate mannosyltransferase, putative
VILPAYNER-ENIPYMLVDAFKKLD----FEILLVDDSSPDGTAAAYKELQKIFRGERLLLRPGLGLGSAYADGLKKT---TGDFIILMDADFSHHPKFIPEFIKKQKEGDFDVVTGSRYIK-GGGVCGWDAKRIIISRGANFLAQTLTGS-FRLFKRNALENIMT--RII--SKGYVFQMEVAVRARELGYSIGE-VPITFVD--RIYGESKLGGNEIWQY-LKGLLT-L
>GT2-DPs|XP_002499594.1|Chlorophyta_Viridiplantae Micromonas commoda;-;Dolichol-phosphate mannosyltransferase subunit 1 (EC 2.4.1.83)
VIVPTYNER-RNIGILLRKAFEDPD----FEVIVVDDNSPDGTQDVVKALAKEYDDDRLLPRPGLGLGTAYVHGLAHA---TGEFVVIMDADLSHHPRAIPEFIAKQREGNFDVVTGTRYVP-GGGVHGWDTRRKLTSRVANYLAHVLTGS-FRLYRKSMLEDLVK--KVV--SKGYVFQMEIIVRCRRAGLSVAE-VPITFVD--RVYGSSKLGGAEIVGY-LKGLLW-L
>GT2-DPs|XP_003492225.1|Arthropoda_Metazoa Bombus impatiens;-;probable dolichol-phosphate mannosyltransferase
ILLPTYNEV-ENLPIIIVKYMDELD----YEIIVIDDGSPDGTLDMAKQLQNVYGEIVLRPREKLGLGTAYMHGIKHA---TGNFIVIMDADLSHHPKFIPKMIEQQRYLDLDIVSGTRYEQ-GGGVYGWDFKRKLISRGANFLTQLLTGS-FRLYKKDVLEKLIQ--SCI--SKGYVFQMEMIVRARQFNYTIGE-IPITFVD--RVYGESKLGGSEIFQF-AKGLLY-L
>GT2-Class1|AEX61698.1|Mimiviridae_Virus Megavirus courdo7;-;Uncharacterized glycosyl transferase
VILPTYNRF-KGFVKVVNNFKAQKLTN--FEFIAIDDGSDMATYNLKKSYIDRFKIFANEKN--MGISYTLNRGISLS---SGEYVTWVSDDNEYYNNYLSVLYDT----NYDFIYSSWILNRNN--INQHVHKNYNNIFDILRNF-WGLASFM-WKRSFIEKIG---LYDQ-NLNGCEDYEYLLRTYMNTDSILY-KKEITMK--YFLTQ-----DS-------------
>GT2-Class1|BAJ94097.1|Streptophyta_Viridiplantae Hordeum vulgare subsp. vulgare;-;Predicted protein
VVTPTHNRI-DYLPATVDSVRNAIEFS--IEHLICANGCNDGTNEWLEKASEIPLRCKIEDE--KGL--ARNHVIKDAP--SHAWIAPLDDDDIMLQRNLFYYAQLIEQPDTEWFLNDFVRVDELRYKWKFESPKSMLEAIFRGEC-FAQGNVC-FSKKLYDEVG---GYHE-TLKMAEDLDLYVRFLLAGKLPGV-SPHISHL--HRCH---------------------
>GT2-Class1|EFA76831.1|Amoebozoa_Protista Polysphondylium pallidum;-;IPT/TIG domain-containing protein
VCIVHFNRP-TLLKQALQSIDKQNYGN--YEVILVDDGSTTEALSYLKSLESRHWKLIRTAN--RYLGAARNTAVREA---SGEYIYFLDDDNAAYPNALATYV-KVAMTNADVVTSPHSIITHTPIQRQWIPLGSSLSVGLFKNC-FGDANFF-IRRATFNAIG---GFTE-EYGVGLDHELLAKLVIHGYKLAI-ATDPLLY--YRIH---------------------
>GT2-Class1|KDE08567.1|Basidiomycota_Fungi Microbotryum lychnidis-dioicae;-;Uncharacterized protein
IITATQNPR-SVMLETAQTVLGQSLQN--IQWVIVDDHSNEDSLAMLASIAKDPRVVILKND--RGLAASRNVALRIA---AGRYIASLDDDDLYELTALEKTVWMLESPEWDL--GGFHVIKNANNETIVQGVHSGSANFFNGNF-VPNAAVY-TSRAIVNTCR---YDDV-NFAVGGDWDFWMCLAENGHWGGS-VPEPLYW--YR-----------------------
>GT2-Class1|KII67796.1|Cnidaria_Metazoa Thelohanellus kitauei;-;Putative pyruvyl transferase EpsO
VVIPVYNVS-KYVLEAIDSVINQTITP--FEVIIVDDGSTDNSGELVEQYEIQYVKIIHTHN--QGLGEARNVGTRAA---LGEYIYYFDSDDVLQL-YLIEDFYNALKNGELDIFAFSAESFDGADKEMVAPQNKLPKYLRVHET-LFSTGTF-YRRKFFTD------FNI-TFKIHEDEEFTPRLFLHAGKTFI-TRKCFFK--RRVRA-----GS-------------
>GT2-Class1|WP_000922023.1|Proteobacteria_Bacteria Helicobacter pylori Hp A-17;-;Glycosyl transferase (EC 2.4.-.-)
VITACFNSE-KTIEDTILSVLHQTYKN--IEYIIIDGASTDSTLEIIQKYRDKIACVVSEKD--KGIYDAMNKGIKRA---SGDIIALLNSDDFYKDEFVIEKVVHEFEKHCDSVYADLVFVKDRLEKVVRYYESFNPKTLLYGVV-PAHPTLF-VKKAIYERYG---LYKT-DYKISADFEMIIRLFVVQKIFSY-LKEVLVV--MRTGG-----VSAS-----------
>GT2-Class1|WP_015859753.1|Euryarchaeota_Archaea Thermococcus gammatolerans;-;Glycosyltransferase, family 2
VIIPTYNRA-NLLRRAITSVLNQTFRD--FELIVVDDASPDNTPEVVESINDGRIRYVRKKN--SGGPVARNTGIKKA---RGKFIALLDDDDEWLPHRLETQVRKFELQNIGVVYGGFYYVSQDGRILGKRLPAYKYDKLLRENF-IGSPTLL-IRRECFKRAG---LFDP-NLSSSQDWDMWLR-IARHYKFDY-VDEIVAK--YYVHG--------------------
>GT2-Class1|XP_007514489.1|Chlorophyta_Viridiplantae Bathycoccus prasinos;-;Glycosyl transferase family 2
IVMAAYNQG-AYIDETVKSVAAQSYER--WELIIVNDGSSDDSSNLMDKYGKRRIRLINKRN--GGLADARNVGMRYA---RGDWLCMLDSDDLLARDYLSRAAELVEEGGVDIIPGCMRNFD---VSSDWCFPEGFSIVGVSHWN-KFHASVL-MKADLMRKVG---GYDP-GIPWGLDWNFWLNAAKFNPIVRF-VPEITFY--YRHHK-----GTS------------
>GT2-Chitin-HAS|AAC50692.1|Chordata_Metazoa Homo sapiens;HYAS2;Hyaluronan synthase 2 (EC 2.4.1.212) (Hyaluronate synthase 2) (Hyaluronic acid synthase 2) (HA synthase 2)
LCIAAYQEDPDYLRKCLQSVKRLTG----IKVVMVIDGNSEDTQLV-----LSNKSICIMQK--WGGKREVMYTAFRALGRSVDYVQVCDSDTMLDPASSVEMVKVLEDPMVGGVGGDVQIL-NKYDSWISFLSSVRYWMAFNIERACISGPLGMYRNSLLHEFVEDWEFMGNQCSFGDDRHLTNRVLSLGYATKY-TARSKCL--TETPIEYLRWLNQQTRWSKSYFR--
>GT2-Chitin-HAS|AAC50706.1|Chordata_Metazoa Homo sapiens;HYAS1;Hyaluronan synthase 1 (EC 2.4.1.212) (Hyaluronate synthase 1) (Hyaluronic acid synthase 1) (HA synthase 1) (HuHAS1)
LTISAYQEDPAYLRQCLASARALAR----LRVLMVVDGNRAEEALV-----RTRRCVCVAQR--WGGKREVMYTAFKALGDSVDYVQVCDSDTRLDPMALLELVRVLEDPRVGAVGGDVRIL-NPLDSWVSFLSSLRYWVAFNVERACISGPLGLYRNNLLQQFLEAWKFLGTHCTFGDDRHLTNRMLSMGYATKY-TSRSRCY--SETPSSFLRWLSQQTRWSKSYFR--
>GT2-Chitin-HAS|AAF36984.1|Chordata_Metazoa Homo sapiens;HYAS3;Hyaluronan synthase 3 (EC 2.4.1.212) (Hyaluronate synthase 3) (Hyaluronic acid synthase 3) (HA synthase 3)
LCIAAYQEDPDYLRKCLRSAQRISD----LKVVMVVDGNRQESLQE-----GMDRVRCIMQK--WGGKREVMYTAFKALGDSVDYIQVCDSDTVLDPACTIEMLRVLEDPQVGGVGGDVQIL-NKYDSWISFLSSVRYWMAFNVERACISGPLGMYRNSLLQQFLEDWKFLGSKCSFGDDRHLTNRVLSLGYRTKY-TARSKCL--TETPTKYLRWLNQQTRWSKSYFR--
>GT2-Chitin-HAS|AGE52748.1|Phycodnaviridae_Virus Paramecium bursaria Chlorella virus CZ-2;-;Hyaluronan synthase
VIIAGYREDPFMFKKCLESVRDSNV----ARLICVIDGDEEEEDNV-----KKPGVVCILQP--HRGKRESLYTGFQLA--SMDAVVLIDSDTVLEKNAILEVVYPLSDPNIKAVAGECKIW-NT-DTILSMLVSWRYFSAFNVERGCVGGPLGAYTIDIINEIKDPWTFLGNKCTYGDDRRLTNEVLMRGKKIVY-TPFAVGW--SDSPTNVMRYIVQQTRWSKS-----
>GT2-Chitin-HAS|CEO98028.1|Rhizaria_Protista Plasmodiophora brassicae;-;Uncharacterized protein
VIVPTIDAGPE-FIRAASQWIKNRP----AEIIVVTTHALRNVASL-----PDGHFRVLSVP--YANKRVQLVEGINAA--TTPILALSDDDAIWADHFLRWCLVPFNDDKMGGVGSSQRMT-PEKPTFWEVMADMRLSMRMMEASSCLSGRTALYRTEILTDPDLQYKWRGYQLHSGDDKFLTRWLVKKHWNMHF-QMHRDAM--LDTTKPNWMFLKQLLRWTRNTWR-S
>GT2-Chitin-HAS|EWG07923.1|Crenarchaeota_Archaea Candidatus Aramenus sulfurataquae;-;Glycosyl transferase family protein
-VIPVYNEDPELFEKVIKSVSK-------IKFVVVGDGCSDP--TK-----KYGGEFVHLKK--RSGKRVALAEGFKRV--RTKYVLFLDSDTVLEEGALEQMLSSM-DEDVGGVSPRILMM-NN--GKLSYYYAEFFERMSEVLQRVLYGHCALYKREAIKGLVLSKKVLGMRILIGDDRQLTNYVLNHGYKAKI-DYKAIAY--TMPPKDIRGFFNQLIRWTKANYL-Y
>GT2-Chitin-HAS|KKO96819.1|Ascomycota_Fungi Trichoderma harzianum;-;Uncharacterized protein
VIIPTIHNVFEELRPSLQSILACKP----AELILVTTHDKRKARSL-----NYPKVRVMHTP--IANKRLQVCEALPSV--ETPITIMADDDVSWPSTLMPWILAPFEDPKMGGVGTCQRVK-REWTRIWNWLGAAYIERRNFEISACMSGRTGAYRSSILKSHDFLDKWRKWILNADDDNFVTRWLVSHQWKTWI-QYERECE--IETLENGPKFLYQCSRWARSNWR-S
>GT2-Chitin-HAS|WP_012712297.1|Crenarchaeota_Archaea Sulfolobus islandicus;-;Glycosyl transferase family 2
VLIPVYKEDVDVFKEVIDSVKKQ-D----LKFIVVGDGCDEP---R-----TKGGLFIKLDK--NMGKRRAIREGFKYV--KTPYVLLLDSDTILPDDSV-DLLSSKLIGDIVAVSPEISVL-PG-KNIIAYHVSEMMQRLREISYRSLNGQCILVRTDVIRPLIESEKLWRFSTILGDDRQITNYIYSNGYKATV-TKDVVVK--TKAPDTISGLLKQMVRWYRSNNF-F
>GT2-Chitin-HAS|WP_023678264.1|Proteobacteria_Bacteria Mesorhizobium sp. LSJC280B00;-;N-acetylglucosaminyltransferase
VIVPCFNEDPRTLSECLASIADQER----LRVYVVDDGSNREHETY-----ARDPRFILLPE--NVGKRKAQIAAIRRS--SGDLVLNVDSDTILASDVITKLVPKMRDPAVGAVMGQLTAS-NRSESWLTRLIDMEYWLACNEERACCCGPCAMYRRSAL--LLLLDFFRGKPSDFGEDRHLTILMLKAGFRTEY-VPSAIAA--TVVPNRLGPYLRQQLRWARSTFR--
>GT2-Chitin-HAS|WP_035413543.1|Firmicutes_Bacteria Bacillus sp. SJS;-;glycosyltransferase
VVIPSYNESPDSVLGTIESILKQDYPI--HEIFLIDDGSKDGKLKE-----NPNLIVHRLPQ--NKGKRHAQIWAFEKA--TGDVFITVDSDCTVFPNAVRELLKPFNNPEVSATTGHVNIR-NRTDNVLTRLIDMRYDNAFRVERAVCSGPLSAYRREVVM--KNLDMFLGQQVQLGDDRCLTNYAIREG-KTLY-QSTARCI--TDAPTDLRTLLKQQSRWNKSFFR--
>GT2-Chitin-HAS|XP_008255761.1|Chordata_Metazoa Oryctolagus cuniculus;-;Uncharacterized protein
LCIAAYQEDPDYLRKCLRSAIAFPD----LKVVMVVDGNRQEDAVV-----RTSTFSCIMQK--WGGKREVMYTAFKALGDSVDYIQVCDSDTVLDPACTIEMLRVLEDPQVGGVGGDVQIL-NKYDSWISFLSSVRYWMAFNVERACISGPLGMYRNSLLQQFLEDWKFLGSKCSFGDDRHLTNRVLSLGYRTKY-TARSKCL--TETPTKYLRWLNQQTRWSKSYFR--
>GT2-Chitin-HAS|XP_011120880.1|Ascomycota_Fungi Arthrobotrys oligospora;-;Uncharacterized protein
LVIPTIDGEGPEFEETLRRCLETGV----KEIIIVTVKKLQQASNV-----CPDRIRVFAIR--KANKRKQMVKAIPEV--KTPILIFADDDVLWPRTFLPWILAPFENPKIGGVGTSQRLK-RTNRTFWTILGAFYLERRNFEFSACLSGRTVAYRTKILQDKAFMDLWRQFRLNTDDDNFLTRWIVNHGWDSYE-QCHDECE--LRTLSDDSKFLKQCLRWARSNWR-S
>GT6|AAD26574.1|Chordata_Metazoa Homo sapiens;BGAT;Histo-blood group ABO system transferase (Fucosylglycoprotein 3-alpha-galactosyltransferase) (Fucosylglycoprotein alpha-N-acetylgalactosaminyltransferase) (Glycoprotein-fucosylgalactoside alpha-N-acetylgalactosaminyltransferase) (EC 2.4.1.40) (Glycoprotein-fucosylgalactoside alpha-galactosyltransferase) (EC 2.4.1.37) (Histo-blood group A transferase) (A transferase) (Histo-blood group B transferase) (B transferase) (NAGAT) [Cleaved into: Fucosylglycoprotein alpha-N-acetylgalactosaminyltransferase soluble form]
TVFAIKKYV-AFLKLFLETAEKHFMVG--HRVHVFTDQPAAVPRVTLGTGRQLSVLEVGAYKRWQDVSMRRMEMISDFCEREVDYLVCVDVDMEFRDH-VG--VEI-LTPLFGTLHPSFYGSSERRPQSQAYIPKDEGDF-------YYMGAFFGGSVQEVQRLTRACDQANGEAVWHDESHLNKYLLRHKPTKVL-SPE--YLFTAV-PK-----NHQAV---------R
>GT6|AAQ01588.1|Chordata_Metazoa Homo sapiens;GL6D1;Putative glycosyltransferase 6 domain-containing protein 1 (EC 2.4.1.-) (Galactosyltransferase family 6 domain-containing 1)
AVFATGRFA-EYLRPFLHSANKHFMTG--YRVIIMVDAFFKLPDIEPSPLRTFKAFKVGTERWWLDGPLVHVKSLGEHIASEVDFLFSMAANQVFQNE-FG--VET-LGPLVAQLHAWWYFRNERRPTSAACIPFGQGDF-------YYGNLMVGGTPHNILDFIKEYDIKNG--NSTYEKHLNKYFYLNKPTKLL-SPA--YSVAH------------------------
>GT6|AFB74122.1|Chordata_Metazoa Homo sapiens;-;Glycosyltransferase A
TVFAIKKYV-AFLKLFLETAEKHLMVG--HRVHVFTDQPAAVPRVTLGTGRQLSVLEVRAYKRWQDVSMRRMEMISDFCEREVDYLVCVDVDMEFRDH-VG--VEI-LTPLFGTLHPGFYGSSERRPQSQAYIPKDEGDF-------YYLGGFFGGSVQEVQRLTRACDQANGEAVWHDESHLNKYLLRHKPTKVL-SPE--YLFTAV-PK-----NHQAV---------R
>GT6|AIX16746.1|Caudovirales_Virus Synechococcus phage ACG-2014f;-;Glycosyltransferase family 6
----TGRYL-EFLPKYYEQAEANLFPD--RPKHVFTDGDLELPD-------NVTVYE-QEHLQWPYITLYRFGIIQKHLEEECGFLLFMDADTQVVSP-VS--FDE-VKPYTGVHHPCHLNMPETNTASAACKPGDDFSV-------YWQGCVWGGNIKGARKIIDTLDEENGIAKWHDESHINRYFLDNK-DKVL-SPS--FAIVHL-AK-----EN-------------
>GT6|NP_001073907.1|Chordata_Metazoa Homo sapiens;A3LT2;Alpha-1,3-galactosyltransferase 2 (EC 2.4.1.87) (Isoglobotriaosylceramide synthase) (iGb3 synthase) (iGb3S)
TIFAVGRYL-EYLERFLETAEQHFMAG--QSVMVFTELPGAVPRVALGPGRRLPVERVARERRWQDVSMARMRTLHAALGGEAHFMFCMDVDQHFSGT-FG--PEA-LAESVAQLHSWHYHWPERDAHSAAAMAWGQGDF-------YNHAAVFGGSVAALRGLTAHCDRARGEARWHDESHLNKFFWLHKPAKVL-SPE--FCLLWA-PK-----GYRLL---------R
>GT6|NP_068836.2|Chordata_Metazoa Homo sapiens;GBGT1;Globoside alpha-1,3-N-acetylgalactosaminyltransferase 1 (EC 2.4.1.-) (Forssman glycolipid synthase-like protein)
TVFAVGKYT-HFIQSFLESAEEFFMRG--YRVHIFTDNPAAVPGVPLGPHRLLSSIPIQGHSHWEETSMRRMETISQHIAKEVDYLFCLDVDMVFRNP-WG--PET-LGDLVAAIHPSYYAVPERRRVSTAFVADSEGDF-------YYGGAVFGGQVARVYEFTRGCDKANGMAAWREESHLNRHFISNKPSKVL-SPE--YLFSTL-DK-----DISCL---------R
>GT6|WP_007659223.1|Bacteroidetes_Bacteria Parabacteroides goldsteinii;-;Glycosyl transferase family 6
----TGRYS-IFWKKFYQSTEKSFMQG--LPCIVFTDNPCLYGEKKNKRIHRIY----QENLGWPDNTLMRFSMFLK-IKEETDYLYFFNANMVIREK-IG--KEF-LPELVGLIHPGGYDREDRNEKSTAYIPYGEGRY-------YYAGGLNGGRTPAFLKMSETLDKRNGMALWHDESHINRYFLDHPPYS-L-TPA--YC---------------------------
>GT6|XP_001499204.1|Chordata_Metazoa Equus caballus;-;Globoside alpha-1,3-N-acetylgalactosaminyltransferase 1
TVFAVGKYT-HFVQHFLESAELFFMHG--YRVCVFTDDPTAIPQVPLGPGRRLGIIPIQRHSRWEEISTRRMEIISQHIAKEVDYLFCVDVDMVFRNP-WG--PET-LGDLVAAIHPGYYAVPERRHVSTAFVADGEGDF-------YYGGAVFGGRVANVYEFTRGCDKANGMAAWQEESHLNRRFISHKPSKVL-SPE--YLFSTL-DK-----DTSWL---------R
>GT6|XP_005841000.1|Cryptophyta_Protista Guillardia theta;-;Uncharacterized protein
---ASGRYN-EFVLPLIKSAKEFFVSS--LRIVIFTDQLDEVERCQRETSACIGVVFVRREEGWPLSAMMRYRNFLDSWS-DADFLFSIDVDCEFVAP-VG--EEV-LEDLVGTCHVAFYNLRERRQASTAHIPPTRGQR-------YFYSGFFGGSRASFLKMIQYIDLARGIARVHDESHVNKFFELFPPSCLL-TAA--YMLSFC-PR-----DHMHP----------
>GT6|XP_006739689.1|Chordata_Metazoa Leptonychotes weddellii;-;glycosyltransferase 6 domain-containing protein 1-like
AVLATGRIA-DYLELFIQSASKHFMTG--YRVIIMVDAFHRLPNLEPGPLQTIQVLDIRGHDA-DDLHLMLMKNLAVHIVGEVDFLFSMTANRVFQND-FG--VET-LGTSVAQLHAWWYFKNERRPGSTACIPLGQGDF-------YYDGTVIGGTPLEILNFIKEYDKENG--NSTYESHLNKYFFIHKPTKLL-SPE--YS-VWL-VK-----AARCS----------
>GT6|XP_010586313.1|Chordata_Metazoa Loxodonta africana;-;N-acetyllactosaminide alpha-1,3-galactosyltransferase-like isoform X2
TVFAVGRYI-DFLSRFMLSADKFFMVD--QKVIVMVDDFSRMPWIHLGPLRTLKVFEIKREKRWQDISMMRMKTISEHIADEVDFLFCMDVDQIFQSK-YG--LET-LGESVAQLHAYWYQANERSQLSEAYIPVGKGDF-------YYHAAVFGGTPIRVLNIASECDKKNNEAVWHDESHLNKYFFLHKPTKIL-SPE--YCLSWD-VK-----DYQFL---------R
>GT6|XP_012520156.1|Chordata_Metazoa Propithecus coquereli;-;PREDICTED: histo-blood group ABO system transferase isoform X2
TVFAIKKYV-VFLKLFLETAEKHFMVG--HRVIVFTDRPDAVPRVALGPGRRLQVLRVRSYSRWQDVSMRRMQMLSDVAEQEVDYLVCADVDMQFHDH-VG--VEI-LSSLFGTLHPGFYGRPERRPQSQAHIPWDEGDF-------YYMGAFFGGSVPEVQRLTKACDRANGEAVWHDESHLNKYLLYHKPTKVL-SPE--YMFVAV-PK-----NHQEI---------R
>GT7|AAD34746.1|Arthropoda_Metazoa Drosophila melanogaster;-;Beta1,4-N-acetylgalactosaminyltransferase A (EC 2.4.1.-) (EC 2.4.1.244) (RE56531p)
IVVPFRDRY-AHLLLFIHPFLMKQRIA--YRIFIVEQT----------------------NGKPFNRAAMMNIGYLEALKLQWDCFIFHDVDLLPLDDR--NLYNC-P-RQPRHMSVAIDTLNFRLPYR------------------SIFGGVSAMTREHFQAVN---GFSNSFGWGGEDDDMSNRLKHANLFISRYARYKMLK--HQKEK------ANPKRYQNGMSKIS
>GT7|AAF56377.1|Arthropoda_Metazoa Drosophila melanogaster;-;Beta-4-galactosyltransferase 7 (EC 2.4.1.-) (EC 2.4.1.133) (FI08434p)
LLVPFRDRF-EELLQFMTAFLKRQGVA--HHIFVLNQV----------------------DRFRFNRASLINVGFQFASDV--DYIAMHDVDLLPLNDN--LLYEY-P-SGPLHIAGP--KLHPKYHYD------------------NFVGGILLVRREHFKQMN---GMSNQWGWGLEDDEFFVRIRDAGLQVTRPGTNDTFS--HIHNH---RKRDTQKCFEMTRKRDK
>GT7|AAF56843.1|Arthropoda_Metazoa Drosophila melanogaster;-;Beta1,4-N-acetylgalactosaminyltransferase B (EC 2.4.1.-) (EC 2.4.1.244) (RE31995p)
IIVPYRQRE-EQLHAFMHNYLPQQLIH--YRIFLVEQF----------------------DHKPFNRAMLFNIGAQVAAEY-FPCLILHDVDLLPLNSG--QIYAC-S-ERPRHMSSALDHWRFRLPYR------------------GLFGGVVAINTAQYQQIN---GMSNLYGWGGEDDDLYERLQALNIDICRFSKYTMLK--H---K---QEQPNANRVRSATLRQE
>GT7|AAG23384.1|Nematoda_Metazoa Caenorhabditis elegans;BRE4;Beta-1,4-N-acetylgalactosaminyltransferase bre-4 (EC 2.4.1.-) (Bacillus thuringiensis toxin-resistant protein 4) (Bt toxin-resistant protein 4) (Beta-4-GalNAcT)
IIVPYRDRE-AHLRIMLHSLLAKQQLD--YAIFIVEQV----------------------ANQTFNRGKLMNVGYDVASRLPWQCFIFHDVDLLPEDDR--NLYTC-P-IQPRHMSVAIDKFNYKLPYS------------------AIFGGISALTKDHLKKIN---GFSNDWGWGGEDDDLATRTSMAGLKVSRYARYKMIK--HSTEA---TNPVNKCRYGQTKRRWN
>GT7|AAH07317.1|Chordata_Metazoa Homo sapiens;B4GT7;Beta-1,4-galactosyltransferase 7 (Beta-1,4-GalTase 7) (Beta4Gal-T7) (b4Gal-T7) (EC 2.4.1.-) (Proteoglycan UDP-galactose:beta-xylose beta1,4-galactosyltransferase I) (UDP-Gal:beta-GlcNAc beta-1,4-galactosyltransferase 7) (UDP-galactose:beta-N-acetylglucosamine beta-1,4-galactosyltransferase 7) (UDP-galactose:beta-xylose beta-1,4-galactosyltransferase) (XGPT) (XGalT-1) (Xylosylprotein 4-beta-galactosyltransferase) (EC 2.4.1.133) (Xylosylprotein beta-1,4-galactosyltransferase)
VLVPFRERF-EELLVFMRRFLSRKKIR--HHIYVLNQV----------------------DHFRFNRAALINVGFLESSNS-TDYIAMHDVDLLPLNEE--LDYGF-P-EGPFHVASPE--LHPLYHYK------------------TYVGGILLLSKQHYRLCN---GMSNRWGWGREDDEFYRRIKGAGLQLFRPTGYKTFR--HLHDPAW-RKRDQKRIAQEQFKVDS
>GT7|AAQ88893.1|Chordata_Metazoa Homo sapiens;CHSS1;Chondroitin sulfate synthase 1 (EC 2.4.1.175) (EC 2.4.1.226) (Chondroitin glucuronyltransferase 1) (Chondroitin synthase 1) (ChSy-1) (Glucuronosyl-N-acetylgalactosaminyl-proteoglycan 4-beta-N-acetylgalactosaminyltransferase 1) (N-acetylgalactosaminyl-proteoglycan 3-beta-glucuronosyltransferase 1) (N-acetylgalactosaminyltransferase 1)
----------------------------------------------------------------FSRALALEVG---SSQFNESLLFFCDVDLVFTTEF---LQRC-R-AQQIYFPIIFSQYDPKIVYS------------------GYGFGITCIYKGDLVRVG---GFDVSQGWGLEDVDLFNKVVQAGLKTFRS----GVV--HVHHP--------------------
>GT7|ADX06399.1|Phycodnaviridae_Virus Organic Lake phycodnavirus 2;-;Putative transcription initiation factor IIB
-IVPYRDRE-QHKFYFMEYVLEDY--D--YEIIFVHQK----------------------DTRPFNRGAMKNIGFLYAEKYNYKTFVFHDIDTLPYKKN--LI----------HYNTEKNVIKHFYGFT------------------FCLGGIFSIKGEDFEKTN---GFP-SWTWGFEDNVIYHRAKKNNIEVNRDIGNMNIL--HFVDGL--SRTISKGRPNIEEVRD-
>GT7|AIE96983.1|Euryarchaeota_Archaea uncultured marine group II/III euryarchaeote AD1000_88_G11;-;DNA-directed RNA polymerase subunit beta (EC 2.7.7.6)
IIVPFRDTT-EQMVVFVVELLKTRSIDGIFDIIIVEQT----------------------KEHSFNRGALLNIGFKTGDS--YDCYIFHDVDLLPEDSM--IPI---Y-AGPYHANSASEWNRYKNPYK-------------------YLGGVLLVGKDMFQKAN---GFPNNFGWGGEDDELRRRLGGEFENTVRLGGLKDLE--NIGTA---REKKNQVRWDNHKTTW-
>GT7|BAA25006.1|Chordata_Metazoa Homo sapiens;B4GT5;Beta-1,4-galactosyltransferase 5 (Beta-1,4-GalTase 5) (Beta4Gal-T5) (b4Gal-T5) (EC 2.4.1.-) (Beta-1,4-GalT II) (Glucosylceramide beta-1,4-galactosyltransferase) (EC 2.4.1.274) (Lactosylceramide synthase) (LacCer synthase) (UDP-Gal:beta-GlcNAc beta-1,4-galactosyltransferase 5) (UDP-galactose:beta-N-acetylglucosamine beta-1,4-galactosyltransferase 5)
ILIPFRNRH-EHLPVLLLPMLQRQRLQ--FAFYVVEQV----------------------GTQPFNRAMLFNVGFQEAMKDDWDCLIFHDVDHIPESDR--NYYGC-G-QMPRHFATKLDKYMYLLPYT------------------EFFGGVSGLTVEQFRKIN---GFPNAWGWGGEDDDLWNRVQNAGYSVSRPGKYKSIP--HHHR----GEVQFLGRYRKSKERQ-
>GT7|BAA75819.1|Chordata_Metazoa Homo sapiens;B4GT2;Beta-1,4-galactosyltransferase 2 (Beta-1,4-GalTase 2) (Beta4Gal-T2) (b4Gal-T2) (EC 2.4.1.-) (Beta-N-acetylglucosaminyl-glycolipid beta-1,4-galactosyltransferase) (Beta-N-acetylglucosaminylglycopeptide beta-1,4-galactosyltransferase) (EC 2.4.1.38) (Lactose synthase A protein) (EC 2.4.1.22) (N-acetyllactosamine synthase) (EC 2.4.1.90) (Nal synthase) (UDP-Gal:beta-GlcNAc beta-1,4-galactosyltransferase 2) (UDP-galactose:beta-N-acetylglucosamine beta-1,4-galactosyltransferase 2)
VIIPFRHRE-HHLRYWLHPILRRQRLR--YGVYVINQH----------------------GEDTFNRAKLLNVGFLEALKEAYDCFIFSDVDLVPMDDR--NLYRC-G-DQPRHFAIAMDKFGFRLPYA------------------GYFGGVSGLSKAQFLRIN---GFPNEWGWGGEDDDIFNRISLTGMKISRPGRYRMIK--HDRDK---HNEPNPQRFQNTKLTME
>GT7|BAA75820.1|Chordata_Metazoa Homo sapiens;B4GT3;Beta-1,4-galactosyltransferase 3 (Beta-1,4-GalTase 3) (Beta4Gal-T3) (b4Gal-T3) (EC 2.4.1.-) (Beta-N-acetylglucosaminyl-glycolipid beta-1,4-galactosyltransferase) (Beta-N-acetylglucosaminylglycopeptide beta-1,4-galactosyltransferase) (EC 2.4.1.38) (N-acetyllactosamine synthase) (EC 2.4.1.90) (Nal synthase) (UDP-Gal:beta-GlcNAc beta-1,4-galactosyltransferase 3) (UDP-galactose:beta-N-acetylglucosamine beta-1,4-galactosyltransferase 3)
IIVPHRARE-HHLRLLLHPFLQRQQLA--YGIYVIHQA----------------------GNGTFNRAKLLNVGVREALRDEWDCLFLHDVDLLPENDH--NLYVCDP-RGPRHVAVAMNKFGYSLPYP------------------QYFGGVSALTPDQYLKMN---GFPNEWGWGGEDDDIATRVRLAGMKISRPGHYKMVK--HRGDK---GNEENPHRFVRTQNSW-
>GT7|BAA75821.1|Chordata_Metazoa Homo sapiens;B4GT4;Beta-1,4-galactosyltransferase 4 (Beta-1,4-GalTase 4) (Beta4Gal-T4) (b4Gal-T4) (EC 2.4.1.-) (Beta-N-acetylglucosaminyl-glycolipid beta-1,4-galactosyltransferase) (Lactotriaosylceramide beta-1,4-galactosyltransferase) (EC 2.4.1.275) (N-acetyllactosamine synthase) (EC 2.4.1.90) (Nal synthase) (UDP-Gal:beta-GlcNAc beta-1,4-galactosyltransferase 4) (UDP-galactose:beta-N-acetylglucosamine beta-1,4-galactosyltransferase 4)
ILVPHRNRE-KHLMYLLHPFLQRQQLD--YGIYVIHQA----------------------EGKKFNRAKLLNVGYLEALKENWDCFIFHDVDLVPENDF--NLYKC-E-EHPKHLVVGRNSTGYRLRYS------------------GYFGGVTALSREQFFKVN---GFSNNWGWGGEDDDLRLRVELQRMKISRPGKYTMVF--HTRDK---GNEVNAERMHQVSRVWS
>GT7|BAA76273.2|Chordata_Metazoa Homo sapiens;B4GT6;Beta-1,4-galactosyltransferase 6 (Beta-1,4-GalTase 6) (Beta4Gal-T6) (b4Gal-T6) (EC 2.4.1.-) (Glucosylceramide beta-1,4-galactosyltransferase) (EC 2.4.1.274) (Lactosylceramide synthase) (LacCer synthase) (UDP-Gal:beta-GlcNAc beta-1,4-galactosyltransferase 6) (UDP-Gal:glucosylceramide beta-1,4-galactosyltransferase) (UDP-galactose:beta-N-acetylglucosamine beta-1,4-galactosyltransferase 6)
VLIPFRNRH-EHLPIFLIPMLQKQRLE--FAFYVIEQT----------------------GTQPFNRAMLFNVGFKEAMKDVWDCVIFHDVDHLPENDR--NYYGC-G-EMPRHFAAKLDKYMYILPYK------------------EFFGGVSGLTVEQFRKIN---GFPNAWGWGGEDDDLWNRVHYAGYNVTRPGKYKSIP--HHHR----GEVQFLGRYRYSKERQ-
>GT7|CAA39073.1|Chordata_Metazoa Homo sapiens;B4GT1;Beta-1,4-galactosyltransferase 1 (Beta-1,4-GalTase 1) (Beta4Gal-T1) (b4Gal-T1) (EC 2.4.1.-) (Beta-N-acetylglucosaminyl-glycolipid beta-1,4-galactosyltransferase) (Beta-N-acetylglucosaminylglycopeptide beta-1,4-galactosyltransferase) (EC 2.4.1.38) (Lactose synthase A protein) (EC 2.4.1.22) (N-acetyllactosamine synthase) (EC 2.4.1.90) (Nal synthase) (UDP-Gal:beta-GlcNAc beta-1,4-galactosyltransferase 1) (UDP-galactose:beta-N-acetylglucosamine beta-1,4-galactosyltransferase 1) [Cleaved into: Processed beta-1,4-galactosyltransferase 1]
IIIPFRNRQ-EHLKYWLHPVLQRQQLD--YGIYVINQA----------------------GDTIFNRAKLLNVGFQEALKDDYTCFVFSDVDLIPMNDH--NAYRC-F-SQPRHISVAMDKFGFSLPYV------------------QYFGGVSALSKQQFLTIN---GFPNNWGWGGEDDDIFNRLVFRGMSISRPGRCRMIR--HSRDK---KNEPNPQRFAHTKETMD
>GT7|CAA82350.1|Nematoda_Metazoa Caenorhabditis elegans;SQV3;Xylosylprotein 4-beta-galactosyltransferase (XGalT-I) (EC 2.4.1.133) (Squashed vulva protein 3) (UDP-galactose:beta-N-acetylglucosamine beta-1,4-galactosyltransferase sqv-3)
VIVPYRDRL-EELREFMSKFLHNQNVS--HHILIINQT----------------------DPLRFNRASLINVGWNEADRL-CDYMVMNDVDLLPVNPE--VPYDF-P-GIIRHITSP--QYHPKYHYE------------------KFIGGILMLTLKDYKKLN---GMSNKWGWGLEDDEFYLRIIDSKLNLTRVDSSNTFR--HIHGP---KYTPKKNDKEIKRKRD-
>GT7|CAA91401.2|Nematoda_Metazoa Caenorhabditis elegans;-;N-acetyllactosamine synthase
VIIPYRERQ-THLTRLLIPILQRQRLD--FRFIVTEQY----------------------GNDLFNKGRIMNAAFIFAESL-VDCVVFHDVDMFPQDDR--NPYSC-P-PGPRHLGAFVSNLGYQLWYK------------------EIVGGVLAVSMADYRAVN---GYSNQWAWGGEDDDMGQRILSLNYTIERPGRYSMLK--HVKRK---R-TAPKLIYGNSANRV-
>GT7|KDD73636.1|Chlorophyta_Viridiplantae Helicosporidium sp. ATCC 50920;-;Uncharacterized protein (Fragment)
VLIPYRNRE-PHLARLLTPFLEEQKRK--FDIFIIEQV----------------------DDYLFNRGALLNAATLL-LQGEYDYYIFQDVDTIPLASG--NPYAY-P-GQPLHLTPHW--IHPKSTYE------------------DFFGGVLSITPQQLAAVN---GFGAHWGWGREDDNLRMRLSRAGLPPSYPRPQRHAF--FEHQK---HPQATELRADN------
>GT7|NP_001016664.1|Chordata_Metazoa Xenopus tropicalis;-;UDP-Gal:betaGlcNAc beta 1,4- galactosyltransferase, polypeptide 1, gene 2 (UDP-Gal:betaGlcNAc beta 1,4-galactosyltransferase, polypeptide 1) (UDP-Gal:betaGlcNAc beta 1,4-galactosyltransferase, polypeptide 2)
IIIPFRNRD-EHLKYWMHPILKRQQLD--YGVYVINQD----------------------GDKTFNRAKLLNIGYVESLKDAYDCFVFSDVDLIPMDDR--NTYRC-F-NQPRHLSAAMDKFGFGLPYN------------------QFFGGVSALSKEQFLKIN---GFPNNWGWGGEDDDIYNRIASRGMYISRPGRCRMIR--HNRDD---KNDPNPKRFAHTRQTMS
>GT7|WP_042693034.1|Proteobacteria_Bacteria Azospirillum sp. B506;-;galactosyltransferase
IVVPYRDRE-SHLQQFVSAYFDRQPID--YRVTFVEQE----------------------AGLPFNRGALMNAGFLLGEGRDYSCL--HDVDYLPVDPL--LWYGA-E-QRP--VAPGVSDRTVTSNLE------------------STMGGVLLMPNATMRQVD---GYSNSWGWGYEDFDFSLRIRARRLPTSR-GRFHPLD--HINEG---FTPDNRRTFWSTGKIPD
>GT7|XP_002180427.1|Stramenopiles_Protista Phaeodactylum tricornutum;-;Galactosyl transferase
VIVPYRDRA-AHLAKFMQRFFNRKVSD--YHFYIIEQS----------------------DDGRFNRGKLLNIGFDLARKKSHDVFIFHDVDLLPQDDL--GSWKF-P-KSPIHIA---RVWGRYSNNP------------------KYFGGVVSFSSSDYKRIN---GYPNTWGWGGEDDEMQKRLERLGIRFESPDLENMLN--FLRAN---REWKCMVKWEEHEKTWE
>GT7|XP_006557316.1|Arthropoda_Metazoa Apis mellifera;-;Uncharacterized protein
IIIPFRDRP-KHLQTLLHPMLLRQQID--YQIFVIEQK----------------------GSDAFNRAMLMNVGYVEALKEPFDCFIFHDVDLLPENDR--NLYTC-P-EQPRHMSVAVDKFNYRLPYA------------------DLFGGVSAVSREQFRLVN---GFSNVWGWGGEDDDMANRIKAHGLHISRYARYKMLT--H---K---KERANPKRYKTGKKRFD
>GT8-GATL|AAB61117.1|Streptophyta_Viridiplantae Arabidopsis thaliana;GATL9;Probable galacturonosyltransferase-like 9 (EC 2.4.1.-) (Like glycosyl transferase 8)
HVAMTLSEY-LRGSIAVHSMLRHASCPNVFHLIEFDPASPRVLSQL-VRSKVIRED-TVINLISNPLNYARNYLGDILP--CVDRVIYLDSDIIVVDD-ITKLWNTSLTGRIGAP-EYCHAN-FWSDPALPGFFSGRKPC-------YFNTGVMVMDVRWRENYREKLQKKKRIYDLGSLPPFLLVFAGNVEA----IDHR-WNLLHWSGK----GKPWVRL--------D
>GT8-GATL|AAC00579.1|Streptophyta_Viridiplantae Arabidopsis thaliana;GATL8;Probable galacturonosyltransferase-like 8 (EC 2.4.1.-) (Like glycosyl transferase 9)
HIAMTLSEY-LRGSIAVHSVLRHASCPNVFHFIEFDSASPRVLSQL-VRSKVIRED-TVINLISNPLNYARNYLGDILDR-SVERVIYLDSDVITVDD-ITKLWNTVLTGRVGAP-EYCHAN-FWSDPALPGLISGQKPC-------YFNTGVMVMDVRWRENYREKLQKKMRIYDLGSLPPFLLVFAGNVEA----IDHR-WNLLHWSGK----GKPWVRL--------D
>GT8-GATL|AAC78704.1|Streptophyta_Viridiplantae Arabidopsis thaliana;GATL6;Probable galacturonosyltransferase-like 6 (EC 2.4.1.-) (Like glycosyl transferase 10)
HVAITLVEY-LRGSIAVNSILQHSVCPESVFHFVSEETNL--LESL-VRSKIDAPE-TVRGLISQPLNYARSYLADLLP--CVNRVIYLDSDLVVVDD-IAKLWKTSLGSRIGAP-EYCHANFFWSEERFSGTFRGRKPC-------YFNTGVMVIDKKWRRGYTKRIQRRERIYELGSLPPFLLVFSGHVAP----ISHR-WNLLHWSGS----GKPWIRL--------D
>GT8-GATL|AAF30319.1|Streptophyta_Viridiplantae Arabidopsis thaliana;GATL4;Probable galacturonosyltransferase-like 4 (EC 2.4.1.-) (Galactinol synthase 9) (AtGolS9) (GolS-9)
HIAMTLTNY-LRGTMAVLSLLQHSTCPNLSHLSHFENDLFTSIKST-F-PKIQDPN-LVRSKISQPLNYARIYLADIIP--SVDRIIYLDSDLVVVDD-IEKLWHVEMEGKVAAP-EYCHRT-FWSDPVLVKVLEGKRPC-------YFNTGVMVVDNKWRKMYTQKVQKQKRIYHLGSLPPFLLIFAGDIKA----VNHR-WNLLHWSGK----GKPWLRL--------D
>GT8-GATL|AAF79456.1|Streptophyta_Viridiplantae Arabidopsis thaliana;GATL1;Probable galacturonosyltransferase-like 1 (EC 2.4.1.-) (Protein GAOLAOZHUANGREN 1) (Protein PARVUS)
HVAMTLAAY-IRGSVAVLSVLQHSSCPENIFHFSASADASSLRATI-SSSFVVNVS-SVSRLISCPLNYARSYLADLLPP-CVRRVVYLDSDLILVDD-IAKLAATDLGDSVAAP-EYCNAT-FWSNPTLSLTFADRKAC-------YFNTGVMVIDSRWREAYTSRIQKRMRIYELGSLPPFLLVFAGLIKP----VNHR-WNLLHWSGK----GKPWARL--------D
>GT8-GATL|AAG09558.1|Streptophyta_Viridiplantae Arabidopsis thaliana;GATL3;Probable galacturonosyltransferase-like 3 (EC 2.4.1.-)
HIAMTLAIY-LRGSVAVFSVLQHASCPNIVHIARRSADLRRIISST-F-PHIHDPN-LVRSKISQPLNYARIYLADLLPI-AVRRVIYFDSDLVVVDD-VAKLWRIDLRRHVGAP-EYCHAN-FWSSQGYKSALKDRKPC-------YFNTGVMVIDGKWRERVTVKLRKRHRIYELGSLPPFLLVFAGDVEP----VEHR-WNV--------------------------
>GT8-GATL|AAG10630.1|Streptophyta_Viridiplantae Arabidopsis thaliana;GATL5;Probable galacturonosyltransferase-like 5 (EC 2.4.1.-)
HVAITLIDY-LRGSIAVNSILQHSMCPQSVFHFSSESQNLESLIRS-TFPKIYAPE-TVQSLISQPLNYARNYLADLLP--CVKRVIYLDSDLVVVDD-IVKLWKTGLGQRTGAP-EYCHANFFWSDKRFNGTFKGRNPC-------YFNTGVMVIDKKWRQRFTKRIEIQERIYELGSLPPFLLVFAGHVAP----ISHR-WNLLHWSGS----GKPWLRL--------D
>GT8-GATL|AAL59936.1|Streptophyta_Viridiplantae Arabidopsis thaliana;GATL7;Probable galacturonosyltransferase-like 7 (EC 2.4.1.-)
HVAITLFEY-LRGSIAVHSILKHSSCVFFHLVSDLESLIRSTFPEL----KVYDPE-IVRTLISQPLNYARNYLADLLP--CVRRVIYLDSDLIVVDD-IAKLWMTKLGSKTGAP-EYCHANFFWSDERFSGAFSGRKPC-------YFNTGVMVMDERWRRGYTEVIQKSDRIYELGSLPPFLLVFAGEVAP----IEHR-WNLLHWSGS----GKPWFRL--------D
>GT8-GATL|BAB02626.1|Streptophyta_Viridiplantae Arabidopsis thaliana;GATLA;Probable galacturonosyltransferase-like 10 (EC 2.4.1.-) (Galactinol synthase 8) (AtGolS8) (GolS-8)
HIAMTLPAY-LRGTVSVHSILKHTSCPENI--FIASGTSQGSLAKT-LSSSFTEET-TVKNLISSPLNYARSYLSEILSS-CVSRVIYLDSDVIVVDD-IQKLWKISLSGRTGAP-EYCHAN-FWSDQKLSSVFDSKTPC-------YFNTGVMVIDERWREDYTRKIKEDKRIYELGSLPPFLLVFGGDIEA----IDHQ-WNLIHWSGK----GKPWVRL--------D
>GT8-GATL|CAB62445.1|Streptophyta_Viridiplantae Arabidopsis thaliana;GATL2;Probable galacturonosyltransferase-like 2 (EC 2.4.1.-)
HVAMTLTAY-LRGSMAILSVLQHSSCPNIVHFVKQSHRLQNYVVAS-F-PRIPDVA-AISGLISSPLNYARNYLADILPT-CLSRVVYLDSDLILVDD-ISKLFSTHIPDVVAAP-EYCNAT-FWSNPSLSITLSLNRPC-------YFNTGVMVIEKKWREDYTRKIQKRIRIYELGSLPPFLLVFAGNIAP----VDHR-WNLLHWSGK----GKPWVRL--------D
>GT8-GATL|ELY90791.1|Euryarchaeota_Archaea Natrialba taiwanensis DSM 12281;-;Uncharacterized protein
---IATAQY-VDEAMGIRSLKEETSDINITHTNGLVGKNEVRLLDS--------IN-TIESYEGSIIT------PNLLP---YDKNLVLDTDTYVSGD-ITPVFSLLSEFDIAAH-NPGSRV-SRDIGGNVARDVPNAFP-------LYNTGV----GLKRCSVYDFLTKYDELMNRSDQPAFREALYERIAT----LPSE-YNIIH------------------------
>GT8-GATL|GAA96427.1|Basidiomycota_Fungi Mixia osmundae;-;Uncharacterized protein
HIALTLSDD-VIGSLAINSTIQRGSRSRLQHIIESSETLRRLLRTR-FNGYTSNMV-PLAQLQAEPIVDARYMFGQLFP--DFDRVIYLDQDTLVLKD-IGRLWRQDMSGRPAGA-ELCFRK-QSDMRENLLDGFHRDRC-------TLNDGVLLYDTQWRDRFASELSTETN-TKLDSLGPFNSVFYRNYEV----LDDS-YNVLHWNGI----FKPW------------
>GT8-GATL|NP_037816.1|Baculoviridae_Virus Spodoptera exigua multiple nucleopolyhedrovirus;-;ORF56 p13 homolog in Leucania separata NPV
VTLVMLDEY-VEGAKVAKSLLASGT-AHDLCMVDVAAEARERLSRF-YDRYVYCPP-MLT--KRIDKAFTKWQCLKL-M--EYEKIIYLDADHLVVKN-IDHLFHLQAPAICTDD-NYGYYDRLQFSPDTVATFMRYNKI-------LCKGGTILFQDMKLYTILNFLTKSHFHNGFDEQVLLQALLKVPIMQ----LSVL-YAVINYYGD----VKPWHFD--------D
>GT8-GATL|WP_000022401.1|Proteobacteria_Bacteria Helicobacter pylori ELS37;-;Lipopolysaccharide1, 2-glycosyltransferase
PIVIAFNHY-AIPAGVLYSMLAHDKKLFYKHCLNLSLENQRKLKET-LAPSVFDIS-TPNLYTLSKMVMCRLFLASLFP--QYDKIIMFDADTLFLND-VSESFFIPLDGYYGAA-KDFKFF-LHEHYLKEKDMKIICEN-------HYNVGFLIVNKLWRAHLEERLHQKGQCVFCPEQDLLTLACYQKVLI----LPYI-YNMLHFYFI----GKPWVSP--------S
>GT8-GATL|XP_002501478.1|Chlorophyta_Viridiplantae Micromonas commoda;-;Hexosyltransferase (EC 2.4.1.-)
HVVLLCENI-EQGLFAINSIVANATPNDLHHVGSSRIEAAEELEALFGDKVVVVPT-IVPWYRRNLMNYARFFVADMFP--SLNTYVFMDVDKIVYGDVLRARFNVDGQFLVGAS-RTVFRT-SWRDRVRFLIFCKRHGY-------PFNAGYYVATGLFR-GIPQRCRRGLNICTFNTQPLMMCTLWDRTHA----L--A-WNSIHWNGP----SKGW------------
>GT8-GATL|XP_002736849.1|Hemichordata_Metazoa Saccoglossus kowalevskii;-;PREDICTED: probable galacturonosyltransferase 5-like
NIITATSGH-IKGAPAINSILKTSKSPDIMHIVDAPEIVMKQYLKV-DEKRFYDPE-MAKIWDDSTCNYARNYFYRLFP--DVNRAIYLDIDAVVNRP-IEELWSEAMKPAPLAV-KNQLDY-NRDHFQVDKVMFNSSAS-------LFNGGVFVLDEFYRKNLIDDVKENDPLYRYESQSIMQIIYHGLWQT----MDEK-WNVLHWVGT----HKPWLED--------G
>GT8-GATL|XP_004345180.1|Capsaspora_Capsaspora Capsaspora owczarzaki;-;Uncharacterized protein
NIMTAAETT-LVGVPAIRSVLGNNESSRIHYIAS-QISAIRLTRWL-EGGAPYIAV-MQAEWVETPTNFARYFVLDLFP--EMKRVVYLDADVIVTGN-IIDLHNHRIEGRHAAF-FDCRAS-FFENKRIQAMQLLPKHC-------GLNAGVYVADERWNANVTAQLELNTREHLFGSQGPMQIVFNNRRTN----LDPA-WNLFHWAGP----AKPWL-----------
>GT8-GATL|XP_005765701.1|Haptophyceae_Protista Emiliania huxleyi;-;Uncharacterized protein
HVAVGASHQ-TPGLAPVWSIFSSSRSPHC-HVHYCEAEPSLQSREA-IRRTIVDLE-RFPLL--SAMNLVRFYLPELLP--EASSVLWLDTDIIVRSDVLSKLFVGANRSKSAAVARTITRY-RPSKLGVLNVSTVLRGD-------AFNAGLIAFNQQWRANLTQRVLQEIGLASYASQVPLQLLFGHDFQR----LDSC-WNALHWSGG----DKPW------------
>GT8-GATL|XP_006815404.1|Hemichordata_Metazoa Saccoglossus kowalevskii;-;PREDICTED: uncharacterized protein LOC102808006
HVVTATSNF-FPGVAAVNSLRISTERIKIHLVCEYDVTLREYLECH-GIKELRDTN-FLDEDLISSCNYARSYLYRSFP--DLKKVIYLDSDIVAKQP-IESLWRLQLNGVPLAV-DNNRTY-IDDKVDVDTVSKLYFKR-------YFNGGVLVMDDFFRKHLIDEVDQYDRLWRFDCQSIFHIIYHEFWGK----LNHK-WNLLHWSAA----NKPWN-----------
>GT8-GATL|XP_010246976.1|Streptophyta_Viridiplantae Nelumbo nucifera;-;Hexosyltransferase (EC 2.4.1.-)
HVAMTLAAY-LRGSVAILSVLQHSSCPNIDHFVASADDYLRRTIAN-SFPHLRDDA-AVSGLISCPLNYARNYLANLLPL-CVRRVVYLDSDLILVDD-IAKLAATPLGNAVAAP-EYCNAT-FWSNPALSLTFAGRKAC-------YFNTGVMVIDERWREDYTTKIQKRMRIYELGSLPPFLLVFAGNIAP----VDHR-WNLLHWSGK----GKPWARL--------D
>GT8-GATL|YP_003429362.1|Baculoviridae_Virus Pieris rapae granulovirus;-;p13
VTLVMLDKY-VKGAVAAKSLKSSGTN-HELCLVDVTQT--QELIEV-FTRYLFCGK-MTTERQQIDFSFTKWRCFQLTM---YDKCVYLDADQLVLRN-VDHLFFFNTPAVCNEL-YCRFEC-NNNKVYHNDLKEIYDNYQF-----LFSTGTIVYENTALILIVKRLNQNRFHNGFEEVVLAQVFLEIQTTQ----LSFL-YVVINYYGE----KKPWL-----------
>GT8-LpsGlt|ADX05812.1|Phycodnaviridae_Virus Organic Lake phycodnavirus 1;-;GTA-type glycotransferase/O-methyltransferase domain-containing protein
IFVCVFNYV-DMVFILLESIFIYGNL--------------DENTDILLYTNKIKES-HLYNDKIDKACKARLDLFNLIK--NYNKMLYLDTDIIIKDD-MNKVFDVCTED-ILYVLEEGTIDSNFGNEINNYVDKS-----------AFTSGILLFNEKMKE-LFN--KIVHI--FFHDQ--------PHIVY----NAFK-YNVHHFCG---------------------
>GT8-LpsGlt|BAC11694.1|Chordata_Metazoa Homo sapiens;XXLT1;Xyloside xylosyltransferase 1 (EC 2.4.2.n3) (UDP-xylose:alpha-xyloside alpha-1,3-xylosyltransferase)
------------ARVALRSLLRLAKHEV-LNLHFVSEEASREAKGLLRELCKVIFH-DVAVLTDSAGTYYSVAMHQIMPK-EILQIIQLDLDLKFKTN-IRELFDSFLPGAIIGIAREFWQFRNPQTRVGGPPPEGLP---------GFNSGVMLLNEAMRQPLYS--RLLELRGHLGDQDFFTMIGMEHFHV----LDCT-WNIYH------------------------
>GT8-LpsGlt|CEM17423.1|Alveolata_Protista Vitrella brassicaformis;-;PS_pyruv_trans domain-containing protein
ICMAVDDGI-EQLPTVLNSIHKSNADDF-AAVHVLHRDVDSAKRGMVNALMVLEWV-RVPDHFASQATMWRLFTPTMLP--FQDRLIFLDLDVIVDGR-LRPLWDLPPQQHCIWARSSKTPKVDWLNDTGSFPALN-----------YFNAGVLVMDSWLRGHFEP--FAKRY---VNDQIILNCYCDGKYGE----LPPQ-YNVLHFAGR----RKPWN-----------
>GT8-LpsGlt|EMA27232.1|Euryarchaeota_Archaea Halobiforma lacisalsi AJ5;-;Glycosyl transferase family protein
IVYATDNYW-IPLYNSIYSLLENNRSIN-ANIYIICNEKNEENIDYLHDVININYI-TINDDLFTKGIYYRILLGTLLPE-DINKVLYIDCDTLIVSS-IGDLMNKELEGAMIGAVPHLELISE-----GLSIDNL-----------WYNTGVMLINEKWREEIEE--KCLEY-MRLPLQKILNEIIHEEWKT----FHPK-YNIVHFTGG----NKPW------------
>GT8-LpsGlt|KIK36719.1|Basidiomycota_Fungi Suillus luteus UH-Slu-Lm8-n1;-;Unplaced genomic scaffold CY34scaffold_374, whole genome shotgun sequence
LVLAIDSYA-MAAAVTIRSAIEKTVGR--MTIYIVDCGISVEDKEKIKSS-NVTLI-FLDLPTA--VVWAKIDMIKILP---VERALYLDADMLVRRS-LEELWNTDLEGSSIGAAVDVGF----PLGHDGVSQKR-----------YFNSGMLLIDAKAR-RLSE----LEADARFRDQDVLNVHFAGDWAE----VNLG-WNVVHFTGP----IHP-------------
>GT8-LpsGlt|WP_001272760.1|Proteobacteria_Bacteria Escherichia coli;-;Lipopolysaccharide 3-alpha-galactosyltransferase (EC 2.4.1.44)
VAYGIDNFL-FGCGVSITSVLLHNNDVS-FVFHVFIDDIPEADIQRLAQLTCIQIH-LVNCERLSIAMYFRFVIADYFI--DQDKVLYLDADIACQGN-LKPLITMDLANNIVAVVTERDANWLRGQSLCNELEKG-----------YFNSGVLLINLAWAQSVSA--KAMSMRLTYMDQDILNLILSGKVKF----IDAK-YNLIHYVGP----TKPWH-----------
>GT8-LpsGlt|WP_004618816.1|Firmicutes_Bacteria Ruminiclostridium papyrosolvens DSM 2782;-;Glycosyl transferase family 8
IVSACDHYV-QHLGVMITSLLENTSKTS-LEFYVIDGGITDADKELLCSCCKINFI-TIQADFYSDATYFRIFVSELLDT-SVEKVIYLDCDIVVIKD-IAELWKTDVSEYFLAAVADCGVEYEYKRKLGMKRKDC-----------YFNAGVLLINVKWRESISK--SICKFKIDFADQDGLNAVLCNRWLP----LDSR-WNIIHYTTSYFSGTKPWN-----------
>GT8-LpsGlt|WP_019265353.1|Euryarchaeota_Archaea Methanobrevibacter smithii;-;glycosyltransferase family 8 protein
VSFACDNYS-PYLAICLVSLLKNNDFDE-IEIFVLDSGIKKINKEKIRKIADISFI-HVADNLTSLATYSRLFIASLLP--EVDKVIYLDCDALVLGS-FKEIWDLDLNNYLAAGV--LALNCEVKKAIDLNEDDS-----------YINAGMLLINKRWRQNVEN--QFLEKKHFGMDQGVINNVLSKNLLI----LNPK-YNFQHFCVF----NRPW------------
>GT8-LpsGlt|XP_004241723.1|Streptophyta_Viridiplantae Solanum lycopersicum;-;Uncharacterized protein
----------------------HCNGNA-FKIFIYDPREDVAYEVCRYSLIPLEII-PISELRELESTFTRFLTPHLAN--FEGWAMFVDCDFLYLGD-IKELRDMVDDKYALMCVQHNYAPKTKMDGAVQTVYPR-----------KNWSSMVLYNAHPKNVLTP--EIVETFTWLEDEEI---------GE----VPFV-WNSIHYTLG----G-PW------------
>GT8-LpsGlt|XP_005344866.1|Chordata_Metazoa Microtus ochrogaster;-;xyloside xylosyltransferase 1
------------ARVALRSLLRLAKHEV-LNLHFVSEEASREAKALLRELCKVIFH-DVAVLTDSAGTYYSVAMHQIMPK-EILRIIQLDLDLKYKTN-IRELFE-EFDNFLPGAVRHTFWQFENPKTRVGDPPPP-----------GFNSGVMLLNEAMRQPLYS--HLLELRGHLGDQDFFTMIGMEHFHV----LDCT-WNIYH------------------------
>GT8-LpsGlt|XP_012183248.1|Basidiomycota_Fungi Fibroporia radiculosa;-;Uncharacterized protein
IALTVDAYA-MAAAVVIRSTIVHTTGR--LTFYVVDLGLTDEDRGRLEGFVTIVFI-SLPTN----ATFAKIDMIPILP---VERVLYLDADVLVRAN-LQPLWATDLKRNSIAAVTDIGFP----MGHEGLQRGS-----------YFNAGVILMNTKIRRNV------LKAQSKFRDQDALNRHFMNDWLP----LSLK-WNIVHFTGP----VSP-------------
>GT8-LpsGlt|XP_012349805.1|Arthropoda_Metazoa Apis florea;-;PREDICTED: probable galacturonosyltransferase-like 4
ILVTIDNYI-KPLEVMMYSMKLNNMEQN-LH-WLIHDNIADSALRNLTKYMQVKTV-AMNNNIIPKEMYFRLLSGQVLPA-SLHRVLYLDPDILVINS-LRKLWELDLAGNMFAAAVHEGLTDSSINNIRLGTTTG-----------YFNSGIMLMDDEMRKVKIE--DITAATLILPDQDILNYLYGEDILK----IPETLWNILHFCGK----PKPWQ----------K
>GT8-Fun|CAA62175.1|Ascomycota_Fungi Saccharomyces cerevisiae;GNT1;Glucose N-acetyltransferase 1 (EC 2.4.1.-) (N-acetylglucosaminyltransferase)
LLIS----K-DLLDPNTSSNVAYIQAIDEDQVVI----------KLIDNI--VPKD-TT-P---WNESLTKLLVFNQT---EFDRVIYLDNDAILRSS-LDELFFL-PNYIKFAAPLTYWFLS------SDLEKSYHETRHREKQP-QSYTKVLTKRIGKGSPHSLY----------------------------------------------------------------
>GT8-Fun|CRK43273.1|Ascomycota_Fungi Verticillium longisporum;-;Uncharacterized protein
MMYP----R-RMLEPTASESDGRLLIKAREQYGV----------KLVPIE--VTGK-DS-T---WAESFTKLLAFNQT---SYDRVLSLDSDSAVVQN-MDELFLL-P-PCPVAMPRAYWLFAPSATEFARIQERVNAAG---PDDY------QLYKDTALVPHRPYGEMYLGEVWDPVAVFNEAK------------------FVHFSDW--PVPKPWLPTPKQPKCVK-
>GT8-Fun|XP_009830908.1|Stramenopiles_Protista Aphanomyces astaci;-;Uncharacterized protein
-----------LDSHPTSEWSAALDAANAVQVPV----------EPWTSS--SQGR-SS-V---WWESLTKLRIFEER---GYDKVVYLDADMWLHRN-LDHLFML-KRNNDVNAPRAYYFFAPSNARFRQLYDAVTQ---STRQDYVWDP--------VTFP-SHYV--LLNEFANASDRIAHTY------------------AHHFSAL--PYGKPWEVDRRTKRK---
>GT8-Fun|XP_013904179.1|Chlorophyta_Viridiplantae Monoraphidium neglectum;-;AB hydrolase-1 domain-containing protein
VIVP----A-SFVPRPIH----RTALEARGVRIV----------ESPPLA--GKND-EG-M---YNGCMSKLYVFALT---DYARVIYLDGDALVKQH-LDSLFQL-PA-ADLWAPRAYWKFTPSERLWHRLKDDGAPPRLAN-GMF-------DFKDEAALPGGELLDPVWS-RVGQEELWAAAK------------------VVHFS----QPGKPWFWNTYPTAHTRW
>GT8-Glycogenin|AAA91644.1|Ascomycota_Fungi Saccharomyces cerevisiae;GLG2;Glycogenin-2 (EC 2.4.1.186) (Glycogen synthesis initiator protein 2) (Glycogenin glucosyltransferase 2)
AICTLLYSR-DYLPGALTLAYQLQKVEDEILCLLIEKKLFPQEIALIRSLFKEIII-EPLKDQELSHTLLKARLWELV---QFDQVLFLDADTLPLNKEILRLYQT-R-FQIAAVPDIGWPD-------------------------MFNTGVLLLIPDLDMTSLQ--DFLIKSIDGADQGIFNQFFNPICEWIRL--PFT-YNLIHFIGT----FKPWS---TDYDDHYW
>GT8-Glycogenin|AAA91646.1|Ascomycota_Fungi Saccharomyces cerevisiae;GLG1;Glycogenin-1 (EC 2.4.1.186) (Glycogen synthesis initiator protein 1) (Glycogenin glucosyltransferase 1)
AIATLLYSA-DYLPGVFALGHQVNKLKGDITCLIVTTSLSELAKNILQSIYTKVLV-EPLNCQELSFALIKARLWELT---QFEQVLYLDSDTLPLKE-FLKLFDIMT-SQVGAIADIGWPD-------------------------MFNSGVMMLIPDADTSVLQ--NYIFESIDGSDQGILNQFFNQNCEWVQL--SFT-YNLIHFIGK----HKPWSLWS-FIKNEYW
>GT8-Glycogenin|AAB63818.1|Streptophyta_Viridiplantae Arabidopsis thaliana;GOLS1;Galactinol synthase 1 (AtGolS1) (GolS-1) (EC 2.4.1.123)
AYVTFLANG-DYVKGVVGLAKGLRKVKSAYLVVAMLPDVPEEHRRILVDQGCIREI-EPVYPPEYVINYSKLRIWKFV---EYSKMIYLDGDIQVYEN-IDHLFDL-P-DYLYAVMDCFCPDKVQWPKAELGEPPAL----------YFNAGMFLYEPNLETEDLL--RTLKIPTPFAEQDFLNMYF--KKIYKPI--PLV-YNVVHYCAG----SKPWRYTGREDIKMLW
>GT8-Glycogenin|AAB71970.1|Streptophyta_Viridiplantae Arabidopsis thaliana;GOLS4;Galactinol synthase 4 (AtGolS4) (GolS-4) (EC 2.4.1.123)
AYVTFLANG-DYVKGVVGLAKGLRKVKSAYLVVAMLPDVPEEHREILRSQGCVREI-EPVYPPDYVLNYSKLRIWNFE---EYSKMIYLDADIQVFDN-IDHLFDL-S-DYFYAVMDCFCPL-------------------------YFNAGMFVFEPSPLTESLL--QTLEIPSPFAEQDFLNMFFE--KVYKPI--PLV-YNVVHYCAG----SKPWRYTGREDIKMLW
>GT8-Glycogenin|AAB84377.1|Chordata_Metazoa Homo sapiens;GLYG2;Glycogenin-2 (GN-2) (GN2) (EC 2.4.1.186)
AFVTLATND-IYCQGALVLGQSLRRHRLTRLVVLITPQVSSLLRVILSKVFDEIEV-NLIDSADLGLTLTKLHCWTLT---HYSKCVFLDADTLVLSN-VDELFDR---GEFSAAPDPGWPD-------------------------CFNSGVFVFQPSLHTKLLL--QHAMESFDGADQGLLNSFFRNWSIHKHL--PFI-YNVVHFLGS----MKPWNYKYVLEQGSLW
>GT8-Glycogenin|AAB94141.4|Nematoda_Metazoa Caenorhabditis elegans;-;GlYcoGenin like
---------------------------------------------------------------------------------------------------------------------------------------------------MLDSGVFVFTPSLTVRALL--ALAISSFDGRDQGLLNAYFSNWSSAHRL--PFI-YNIVHFIGA----RK--------------
>GT8-Glycogenin|AAC24075.1|Streptophyta_Viridiplantae Arabidopsis thaliana;GOLS7;Galactinol synthase 7 (AtGolS7) (GolS-7) (EC 2.4.1.123)
AYVTFLANG-DYVKGVVGLAKGLRKVKSAYLVVAMLPDVPEEHREILRSQGCIREI-EPVHPPDYIINYSKLRIWNFE---EYNKMIYLDADIQVFGN-IDDLFDM-Q-DGYYCPEKVVWPP-------------------------YFNAGMFVFEPNPLTESLL--QTLQVPTPFAEQDFLNMFFG--KVFKPV--SPV-YNVVHYCPG----SKPWRYTGREDVKMLW
>GT8-Glycogenin|AAC33195.1|Streptophyta_Viridiplantae Arabidopsis thaliana;GOLS3;Galactinol synthase 3 (AtGolS3) (GolS-3) (EC 2.4.1.123)
AYVTFLAGTGDYVKGVVGLAKGLRKTKSKYLVVAVLPDVPADHRRQLLDQGCVKEI-QPVYPPDYVLNYSKLRIWKFV---EYSKLIYLDGDIQVFEN-IDHLFDL-P-DGFYAVKDCFCPL-------------------------YFNAGMFVYEPSLPTYNLL--ETLKVPTPFAEQDFLNMYFKD--IYKPI--PPV-YNVVHYCAG----AKPWRFTGREDIKMLW
>GT8-Glycogenin|AAC34345.1|Streptophyta_Viridiplantae|1 Arabidopsis thaliana;GUX3;Putative UDP-glucuronate:xylan alpha-glucuronosyltransferase 3 (UDP-GlcA:xylan glucuronyltransferase 3) (EC 2.4.1.-) (Glycogenin-like protein 3) (Plant glycogenin-like starch initiation protein 2) (Protein GLUCURONIC ACID SUBSTITUTION OF XYLAN 3) (AtGUX3)
AYATILHSA-QYVCGAIAAAQSIRMSGSTRLVILVDETISEYHKSGLVAAGWKQMF-QRIRNPNNEWNYSKFRLWQLT---EYSKIIFIDADMLILRN-IDFLFEF-P--EISATGNN--AT-------------------------LFNSGLMVVEPSNSTQLLM--DNINESYNGGDQGYLNEIFTW---WHRI--PKH-MNVLHYLGY----NKPWLCFREFASDEAW
>GT8-Glycogenin|AAC34345.1|Streptophyta_Viridiplantae|2 Arabidopsis thaliana;GUX3;Putative UDP-glucuronate:xylan alpha-glucuronosyltransferase 3 (UDP-GlcA:xylan glucuronyltransferase 3) (EC 2.4.1.-) (Glycogenin-like protein 3) (Plant glycogenin-like starch initiation protein 2) (Protein GLUCURONIC ACID SUBSTITUTION OF XYLAN 3) (AtGUX3)
AYATILHSD-DFVCGAIAVAQSIRMSGSTRLVILVDDSISEYHRSGLESAGWKHTF-QRIRNPKNQWNYSKFRLWELT---EYNKIIFIDADMLILRN-MDFLFEY-P--EISTTGNDG--T-------------------------LFNSGLMVIEPSNSTQLLM--DHINDSYNGGDQGYLNEIFTW---WHRI--PKH-MNVLHYLGY----NKPWVCFRQFASDEAW
>GT8-Glycogenin|AAG00875.1|Streptophyta_Viridiplantae Arabidopsis thaliana;GUX4;Putative UDP-glucuronate:xylan alpha-glucuronosyltransferase 4 (UDP-GlcA:xylan glucuronyltransferase 4) (EC 2.4.1.-) (Glycogenin-like protein 4) (Plant glycogenin-like starch initiation protein 4) (Protein GLUCURONIC ACID SUBSTITUTION OF XYLAN 4) (AtGUX4)
AYVTVLHSS-EYVCGAIALAQSIRQSGSHKMILLHDHTITNKSLIGLSAAGWNRLI-DRIRSPFNEWNYSKLRVWQVT---DYDKLVFIDADFIILKK-LDHLFYY-P--QLSASGNDK--V-------------------------LFNSGIMVLEPSACMKDLM--EKSFKSYNGGDQGFLNEIFVW---WHRL--SKR-VNGLHYLG-----LKPWVCYRVFASDSVW
>GT8-Glycogenin|AAG09103.1|Streptophyta_Viridiplantae Arabidopsis thaliana;GOLS2;Galactinol synthase 2 (AtGolS2) (GolS-2) (EC 2.4.1.123)
AYVTFLAGTGDYVKGVVGLAKGLRKAKSKYLVVAVLPDVPEDHRKQLVDQGCVKEI-EPVYPPEYVINYSKLRIWEFV---EYNKMIYLDGDIQVFDN-IDHLFDL-PNGQFYAVMDCFCPL-------------------------YFNAGMFVYEPNLSTHNLL--ETVKIPTLFAEQDFLNMYFKD--IYKPI--PPV-YNVVHYCAG----AKPWRFTGREDIKMLW
>GT8-Glycogenin|AAH00033.1|Chordata_Metazoa Homo sapiens;GLYG;Glycogenin-1 (GN-1) (GN1) (EC 2.4.1.186)
AFVTLTTND-AYAKGALVLGSSLKQHRTTRLVVLATPQVSDSMRKVLETVFDEIMV-DVLDSGDLGVTLTKLHCWSLT---QYSKCVFMDADTLVLAN-IDDLFDR-E--ELSAAPDPGWPD-------------------------CFNSGVFVYQPSVETNQLL--HLASESFDGGDQGILNTFFSSWAIRKHL--PFI-YNVVHFLGR----VKPWNYTYVTHPEFLW
>GT8-Glycogenin|AAL36305.1|Streptophyta_Viridiplantae Arabidopsis thaliana;GUX8;Putative glucuronosyltransferase PGSIP8 (EC 2.4.1.-) (Glycogenin-like protein 8) (Plant glycogenin-like starch initiation protein 8)
AYATMMYMGTEFYVATRVLIRSLRSLHVEALVVIASLDVPLRWVQTLEEEGAKVRV-ENVDNPYFKLTLNKLYAWALS---DYDRVVMLDADNLFLKK-ADELFQC---GRFCAVFIN--PC-------------------------IFHTGLFVLQPSVEVKDML--HELQVKPDGADQGFLVSYFSDLNGHLRL--PLG-YQVITFPGAVW--LKPWYWWS--------
>GT8-Glycogenin|AAM51981.1|Arthropoda_Metazoa Drosophila melanogaster;-;Glycogenin, isoform B (EC 2.4.1.186) (RE02181p)
AWVTLTTND-TYSLGALVLAHSLKRAKTAHLAVLVTPNVSQAMRDRLKEVYNVQEV-NVLDSQDLGVTFTKLHCWRLV---QFEKCVFLDADTLVLQN-CDELFER-E--ELSAAPDVSWPD-------------------------CFNSGVFVFKPSVDTAQIT--EFAVKSFDGGDQGLLNQFFADWSIKKHL--PFV-YNILHFAGK----LKPWLIQFYAHAQDLW
>GT8-Glycogenin|ABK27907.1|Streptophyta_Viridiplantae Xerophyta viscosa;-;Hexosyltransferase (EC 2.4.1.-)
AYVTFLAGAGDYVKGVVGLAKGLRKVGSAYLVVAVLPDVPDEHRKLLVSQGCIRQI-EPVYPPEYVINYSKLRIWEFV---EYSKMIYLDADIQVYDN-IDHLFDL-P-GGFYAVMDCFCEKTWSHTPQYKIGYCQQCPNKVTWPAEYFNAGMFVHEPSLATEKLL--ATLKVTTPFAEQDYLNMFFKD--IYRPI--PLT-YNVVHYCAG----SKPWRYTGREDIKMLW
>GT8-Glycogenin|AGF85565.1|Mimiviridae_Virus Moumouvirus goulette;-;Glycosyltransferase
AYVTVMYNN-IYLTGALVLGYTLCKTKTKYRIILVTPDVSDLYKSYLSKMYTKIDI-DYVKVNPFRDVFTKLACLNLI---EYEKIILLDLDMIISKN-IDHLFKL-N-PPAACCNNHKLTG-------------------------SINAGLMLLKPDEKEVDIQ--NDINQKYKYPEQDYLSLRYC--GQWTSI--TFN-YNVIHYSSS----YKPWNILTIDQHKKYW
>GT8-Glycogenin|BAB01792.1|Streptophyta_Viridiplantae Arabidopsis thaliana;GUX1;UDP-glucuronate:xylan alpha-glucuronosyltransferase 1 (UDP-GlcA:xylan glucuronyltransferase 1) (EC 2.4.1.-) (Glycogenin-like protein 1) (Plant glycogenin-like starch initiation protein 1) (Protein GLUCURONIC ACID SUBSTITUTION OF XYLAN 1) (AtGUX1)
AYATILHSA-HYVCGAIAAAQSIRQSGSTRLVILVDDNISGYHRSGLEAAGWQRTI-QRIRNPKNEWNYSKFRLWQLT---DYDKIIFIDADLLILRN-IDFLFSM-P--EISATGNNG--T-------------------------LFNSGVMVIEPCNCTQLLM--EHINESYNGGDQGYLNEVFTW---WHRI--PKH-MNVLHYLG-----MKPWLCYR--------
>GT8-Glycogenin|BAB10052.1|Streptophyta_Viridiplantae Arabidopsis thaliana;GOLS5;Galactinol synthase 5 (AtGolS5) (GolS-5) (EC 2.4.1.123)
AYVTFLANK-DYWMLVVGLAKGLRKVKSAYLVVATLPDVPEEHRQILVDQGCIRDI-EPVYPPEYVINYSKLRIWEFV---EYEKMIYLDGDIQVFKN-IDHLFDT-PRGYLYAVKDCFCPV-------------------------YFNAGMLVFGPNLVTEDLL--RVVQIPTYFAEQDFLNIYFRD--IYKPI--PST-YNVVHYCAG----SKPWKFDEREDIKMLW
>GT8-Glycogenin|BAC43192.1|Streptophyta_Viridiplantae Arabidopsis thaliana;GUX2;UDP-glucuronate:xylan alpha-glucuronosyltransferase 2 (UDP-GlcA:xylan glucuronyltransferase 2) (EC 2.4.1.-) (Glycogenin-like protein 2) (Plant glycogenin-like starch initiation protein 3) (Protein GLUCURONIC ACID SUBSTITUTION OF XYLAN 2) (AtGUX2)
AYVTVLHSS-EYVCGAITLAQSLLQTNTKRLILLHDDSISITKLRALAAAGWKRRI-IRIRNPLNEYNYSKFRLWQLT---DYDKVIFIDADIIVLRN-LDLLFHF-P--QMSATGNDVW---------------------------IYNSGIMVIEPSNCTTTIM--SQRSESYNGGDQGYLNEIFVW---WHRL--PRR-VNAVHYLGW-----KPWLCYRVYASDAAW
>GT8-Glycogenin|CAB04823.1|Nematoda_Metazoa Caenorhabditis elegans;-;GlYcoGenin like
AWITLATND-RYAQGALTLLNSLHASGTTRIHCLITNEISNSVREKLVNKFDETVV-DIFNSNDLGVTFTKFHCWRLT---QYSKAVFLDADTMIIRN-SDELFER-P-D-FSAAADIGWPD-------------------------MFNSGVFVFTPSLTVRALL--SLATSSFDGGDQGLLNEYFSNWPSAHRL--PFI-YNIVHFIGA----QKPWNSPPGLHKNEHW
>GT8-Glycogenin|CAB38954.1|Streptophyta_Viridiplantae Arabidopsis thaliana;GOLS6;Galactinol synthase 6 (AtGolS6) (GolS-6) (EC 2.4.1.123)
AYVTFLANK-DYWMGVVGLAKGLRKVKSAYLVVAILPDVPEEHRQILLAQGCIREI-EPVYPPEYVINYSKLRIWNFV---EYEKMIYLDGDIQVFSN-IDHLFDT-PRGYLYAVKDCFCPV-------------------------YFNAGMLVFEPNLLTEDLL--RVVQIPTYFAEQDFLNEYFTD--IYKPI--PST-YNVIHYCAG----SKPWRFDEREDIKMLW
>GT8-Glycogenin|CAB60560.1|Nematoda_Metazoa Caenorhabditis elegans;-;Hypothetical protein Y73F8A.31
------------------------------IHCLITNEISNSVREELENKFDENIV-DFFNSNDP------------------DLAVFLDADTMIIRN-CDELFER-P-D-FSAAADIGWPD-------------------------MFNSGVFVFTPSLTVRALL--ALATSSFDDGDQGLLIEYFSNWNSAHRL--PFI-YN---------------------------
>GT8-Glycogenin|CAD89085.1|Streptophyta_Viridiplantae Arabidopsis thaliana;-;unnamed protein product
AYVTLLHSS-EYVCGAIALAQSIRQSGSTKMILLHDDSITNISLIGLSLAGWKRRV-ERIRSPFNEWNYSKLRVWQVT---DYDKLVFIDADFIIVKN-IDYLFSY-P--QLSAAGNNK--V-------------------------LFNSGVMVLEPSACLEDLM--LKSFKSYNGGDQGFLNEYFVWW--------------GIHYLG-----LKPWRCYRVYASESVW
>GT8-Glycogenin|CAH56861.1|Streptophyta_Viridiplantae Arabidopsis thaliana;-;unnamed protein product
AYATMMYMGTEFYVATRVLIRSLKSLHVDAIVVIASLDVPINWIHALEEEGAKVRV-ENLENPYFKLSLNKLYAWSLS---DYDRVVMLDVDNLFLKN-TDELFQC---GQFCAVFIN--PC-------------------------IFHTGLFVLQPSMEVRDML--HELEVDPDGADQGFLVSYFSDLKGHFRL--PLG-YQVITFPGAVW--LKPWYWWS--------
>GT8-Glycogenin|CAO78709.1|Nematoda_Metazoa Caenorhabditis elegans;-;Uncharacterized protein
AFVSVLSSN-DFLIPAKVLAYRLKKLNSSIYIIIVTQDITEYSINELKQQGVIRND-TKIDTPY---QYTKIRLWAMT---EFDVIVHLDLDILPTRD-ISTLFEC-G-S-FCASFRH--SD-------------------------MFNSGVFVLKTNETVHDME--QHVASSYDGGDQGFLNTYFSDLKSMNRL--SAQ-FNIFHYLGP----TKPWLWWTLDARQEM-
>GT8-Glycogenin|ENN74295.1|Arthropoda_Metazoa Dendroctonus ponderosae;-;Uncharacterized protein (Fragment)
AWVTLATND-SYSLGALVLAHSLKQTGTVHLAVLVTPGVTSAMREKLSSVFNLQEV-NILDSRDLGITFTKLHCWRLT---QFDKCVFLDADTLVLKN-SDELFER-E--ELSAAPDVGWPD-------------------------CFNSGVFVYRPSLETDKLI--QFALESFDGGDQGLLNLFFSDWAISKHL--PFI-YNIIHFIGA----QKPWLQYFSSHLQEVW
>GT8-Glycogenin|NP_197349.2|Streptophyta_Viridiplantae Arabidopsis thaliana;GUX6;Inositol phosphorylceramide glucuronosyltransferase 1 (EC 2.4.1.17) (Glycogenin-like protein 6) (Plant glycogenin-like starch initiation protein 6)
AYVTLLYGD-EFLLGVRVLGKSIRDTGSTKMVALVSDGVSDYSKKLLKADGWKEKI-SLLANPNFWGVYTKLKIFNMT---DYKKVVYLDADTIVVKN-IEDLFKC---SKFCANLKH--SE-------------------------RLNSGVMVVEPSEALNDMM--RKVKTSYTGGDQGFLNSYYPDFPAMERL--STL-YNVIHYLGP----LKPWDWWTVDA-----
>GT8-Glycogenin|NP_568516.1|Streptophyta_Viridiplantae Arabidopsis thaliana;GOLSA;Galactinol synthase 10 (AtGolS10) (GolS-10) (EC 2.4.1.123)
AYVTFLANQ-DYWMGVVGLAKGLRKVKAAYLVVAMLPDVPKEHRQILVAQGCIREI-EPVYPPEYVINYSKLRIWEFV---EYEKMIYLDGDIQVFSN-IDHLFDT-PSGYLYAVKDCFCPL-------------------------YFNAGMLVFEPNLLTEDLL--QTVQVPTSFAEQ--------------PI--PST-YNVVHYCAG----SKPWRFTGREDIKMLW
>GT8-Glycogenin|NP_741749.1|Nematoda_Metazoa Caenorhabditis elegans;GYG1;Glycogenin-1 (GN) (EC 2.4.1.186)
AWITLATND-NYAQGALVLVHSLRTAGTTRIHCLISNEVSAPVRKQLEEHFDDSIV-DVFNSNDLGVTFTKLHCWRLT---QYTKCVFLDADTLVLRN-ADELFTR-P-D-FSAASDIGWPD-------------------------SFNSGVFVYVPNNETRQLV--DFAVTSYDGGDQGLLNDFFSNWPSEHRL--PFI-YNIVHFIGS----VKPWH---AVHTGEHW
>GT8-Glycogenin|WP_013652536.1|Proteobacteria_Bacteria Polymorphum gilvum;-;Glycosyltransferase (Sulfolipid biosynthesis) protein
AYVTLVTNA-DYATGATALLRSLRHTGTAALVVMHTPGADADDLEPLAGLGARCAC-DRLATSEFHDNFVKLRLWQME---DYDSIVFLDADTLVLRS-CDRLFHY-P--QFCAAPNVYESH-------------------------RLNSGVFTARPSQAVEAMT--ARLDAAFWRRDQTFLETFFPD---WHGL--PVY-YNIVHYQ-Y----EKPWQAGHADRLKPLW
>GT8-Glycogenin|XP_002954821.1|Chlorophyta_Viridiplantae Volvox carteri f. nagariensis;-;Uncharacterized protein
AYATLVYGE-DFVLAARVLGQSLRESGTTRMVALTTGSLKASSELTLAADGWRVHV-APVKNPGFAYVYTKLYIFQMT---EYKKIVFLDADVLVIRN-MDVIFKC-P-G-FCAALRH--SE-------------------------RFNTGVMSLVPSLEMDDMM--AKMRSSYTGGDQGFLNSYFPSFAHYMRL--PTT-FNVIHYLGP----FKPWVWWS--------
>GT8-Glycogenin|XP_004349815.2|Capsaspora_Capsaspora Capsaspora owczarzaki;-;Glycogenin
AFVTLVTND-GYALGALVLAKSLRDVNTTRIAVLITNEVSEPTRNRLREAFDVSLV-NELNTHDLGVTLTKIYAWKLT---QFTKCVFLDADTLVVQN-VDELFDR-P--EIAAAPDVGWPD-------------------------CFNSGVFVFVPSAATEKLA--EHAVSSFDGGDQGLLNTFFDYWGPEHRL--SFL-YNIIHFIGQ----FKPWHWRVAPTHSEFW
>GT8-Glycogenin|XP_004867379.1|Chordata_Metazoa Heterocephalus glaber;-;glycogenin-2 isoform X1
AFVTLATND-LYCQGALVVGQSLRNHRTVRLVVLITPQVSGPLRVILSRVFDEIVV-NLLDSEDLGITLTKLHCWTLT---QYSKCVFLDADTLVLSN-IDELFDR---GEFSAAPDPGWPD-------------------------CFNSGVFVFRPSLETSRLL--QHATESFDGADQGLLNAFFRNWAIHKHL--PFI-YNVVHFLGP----RKPWNYTY--------
>GT8-Glycogenin|XP_009224179.1|Ascomycota_Fungi Gaeumannomyces graminis var. tritici;-;Glycosyl transferase
VWTTLITNL-DYLPGLLTLEYSLRKHGSAYLVVLYTDTFPESGRAALAARGTAQRI-EYLLPTRFYDCWSKLVPFSLE---QYDRVVQVDSDMLVLQN-MDELMDL-ELRVLAASYACACNPLRKAHYPADWVPANCAFTSQHGDADMLNGGLQVLRPNGALAQIV--EYMEESMDFADQSLLSDLFRGR--WVPL--PYT-YNNLHYILT----PKPWE-DLNPGAEETW
>GT8-XylT|AAF56394.2|Arthropoda_Metazoa Drosophila melanogaster;-;IP22168p (Shams) (EC 2.4.2.26)
VVVSCGQRV-QETLVMIKSAILFNYEY--LKFVIFTEDGKGDEFRELTDWFTDEIL-PLKFPSGKPCAAQRLFLPSLLT--HVDSLLYVDTDILFLSP-ISDIWRFFKKTQMALTPEHE----NENIGWYNRFARHPFYGR------LGNSGVMLMNRRE--------KWEQHRIIWGDQDIINILFYYHPDKLYI-MPCE-YNVIHGNRGYFHSDRQPLFKSNYQLGSN-
>GT8-XylT|EUC67286.1|Basidiomycota_Fungi Rhizoctonia solani AG-3 Rhs1AP;-;Uncharacterized protein
-VMIGADSA-TEGAMTIKSAIMHSSRP--LSFRLVCSEDAISIIKHLSLFSVDAFY-PMTLDADAGMGGLKVFLHELLP--DVDHAIFVDTDMLFVVD-PVLLWNTFSTEQMAF----------PTLG--------PKSDA------SRCTCVMLLNARDKADRALSGIADADEPLFGDQGIYHIIWTHFPELFAH-LSLQ-WD---------------------------
>GT8-XylT|NP_001073862.1|Chordata_Metazoa Homo sapiens;GXLT2;Glucoside xylosyltransferase 2 (EC 2.4.2.42) (Glycosyltransferase 8 domain-containing protein 4)
AVVACGNRL-EETLVMLKSAVLFSHRK--IQFHIFTEDSLKPEFDKLRQWKKERIY-PITFSVGKPCAAQRLFLPVILK--DVDSLLYVDTDVLFLRP-VDDIWKLLRLTQLAMAPEHE----IPKIGWYSRFARHPFYGS------AGNSGVMLMNRRSTQKNSMIPAWEDMAITWGDQDLLNIIFYFNPECLYV-FPCQ-WNVLHGNRGVYHDDKQPTFRADFPFQDNF
>GT8-XylT|NP_775872.1|Chordata_Metazoa Homo sapiens;GXLT1;Glucoside xylosyltransferase 1 (EC 2.4.2.42) (Glycosyltransferase 8 domain-containing protein 3)
AVVACGERL-EETMTMLKSAIIFSIKP--LQFHIFAEDQLHHSFKGLDNW-TNTLY-PITFPSEKPCASQRLFLPLILK--EVDSLLYVDTDILFLRP-VDDIWSLLKKTQIAMAPEHE----EPRIGWYNRFARHPYYGK------TGNSGVMLMNRRRKYKNDMTTQWGDINITWGDQDLLNIVFFHNPESLFV-FPCQ-WNILHGNRGVYHDDKQPAFRANCSFEDD-
>GT8-XylT|NP_941014.1|Chordata_Metazoa Mus musculus;GXLT2;Glucoside xylosyltransferase 2 (EC 2.4.2.42) (Glycosyltransferase 8 domain-containing protein 4)
AVVACGNRL-EETLVMLKSAVLFSHRK--MRFHIFTEDALKPEFDKLRQWKKERLY-PITFSVGKPCAAQRLFLPAILK--DVDSLLYVDTDVLFLRP-VDDIWKLLRQTQLAMAPEHE----IPKIGWYSRFARHPFYGS------AGNSGVMLMNRRNTQKNSLIPAWEEMAITWGDQDLLNIIFYYNPECLYV-FPCQ-WNVLHGNRGVYHDDKQPTFRADFPFQDNF
>GT8-XylT|XP_005646365.1|Chlorophyta_Viridiplantae Coccomyxa subellipsoidea;-;Hexosyltransferase (EC 2.4.1.-)
---ACGETV-KSEFFMLKSLYLFAREP--AYYHIHV---LSDGAVSEDLASNKSVH-P-KFPGAKLCSTERMYLHQHFK--DLDKVIYVDTDTLWLDD-AVFWWTHFKHMRAGLAENAG----SGNGSWYIN-APIPHHGE------RGNAGTMMASARASNTAERDA--IANQLPLGDQDVLNIYGHDHPDQIYV-MPCI-FNVLHGNR---------------------
>GT8-XylT|XP_008548664.1|Arthropoda_Metazoa Microplitis demolitor;-;PREDICTED: glucoside xylosyltransferase 1
CVVVCGDRL-DESLTMFKSALVFTKRP--LKLIVIAEDDLIVAFDELSEWNSTVLR-PIQFPNNKPCAAQRLFLPALLN--DTDAILYVDTDTLFLAP-PELVWDEFKKTQLALSPEHE----DPNTGWYNRFAKHPYYGK------LGNSGVMLMNRRE--------RWTDYKITWGDQDIINIIFHYHPERLYI-YPCR-YNVIHGSRGTFHSQKQPPFRAQYQFGTDY
>GT8-XylT|XP_009035674.1|Stramenopiles_Protista Aureococcus anophagefferens;-;Uncharacterized protein
ALVACGRRA-REALAVIASAVLAAICK--LRFHVLCNQAAAEHFAAVPAVKRGYNH-LVVTLSVKPCAVVKLFLPSLLA--KNDAAVYVDTDVLFLDD-PQRVWAVGALGAVAAAAEHG----DLEAGCSSHFYDHEAFAD------DGNTGVVALNRRAVGE-----RLVEAALSLGDQSVFNVAAGNASLDVAR-LPCE-FNLLHAPRSAAHADSAPAFGVDVLRGD--
>GT8-Lrg|AAF47138.1|Arthropoda_Metazoa Drosophila melanogaster;-;FI19481p1 (Xyloside xylosyltransferase) (EC 2.4.2.26)
-----YHLN-LKFDLFAHSLLKHTSAQ--LHLHVITDSIRRFRRTVYTIYSSIDAA-KLSPYFSDSLFFLSLGLHRIADR-SLNRAILLDCDIVFRSD-VRLLFNEFDNHQLGLAPELTPVY-RHILYRYRVRYPKTSP--------GLNSGVVLLLRRKLTSEVHTLVAKYS---LGDQDFFTLLGYEYPNLIYR-LDCI-WNMYHGN----------------------
>GT8-Lrg|BAC04675.1|Chordata_Metazoa Homo sapiens;LARG2;LARGE xylosyl- and glucuronyltransferase 2 (EC 2.4.-.-) (Glycosyltransferase-like 1B) [Includes: Xylosyltransferase LARGE2 (EC 2.4.2.-); Beta-1,3-glucuronyltransferase LARGE2 (EC 2.4.1.-)]
IVCAGHNSS-RDVITLVKSMLFYRKNP--LHLHLVTDAVARNILETFHTWRVFHAD-QLKPRVSGLYGLMKLVLPSALPA-ELARVIVLDTDVTFASD-ISELWALFAHTQAGLVENQSDWY-LGNLWKNHRPWPALGR--------GFNTGVILLRRRQAGEQMWRLTARREATSLADQDIFNAVIKEHPGLVQR-LPCV-WNVIHWNSPKHVEFFRNFYLTNLL----R
>GT8-Lrg|CAA07571.1|Chordata_Metazoa Homo sapiens;LARG1;LARGE xylosyl- and glucuronyltransferase 1 (EC 2.4.-.-) (Acetylglucosaminyltransferase-like 1A) (Glycosyltransferase-like protein) [Includes: Xylosyltransferase LARGE (EC 2.4.2.-); Beta-1,3-glucuronyltransferase LARGE (EC 2.4.1.-)]
IVCAGYNAS-RDVVTLVKSVLFHRRNP--LHFHLIADSIAEQILATFQTWRVFNAD-ELKSEVSGIYGLMKLVLTKTLPA-NLERVIVLDTDITFATD-IAELWAVFHKQQVGLVENQSDWY-LGNLWKNHRPWPALGR--------GYNTGVILLLKRKMKEQMWRLTAERESTSLADQDIFNAVIKQNPFLVYQ-LPCF-WNVIHWNSPKHVEFFRNLYLTNLL----R
>GT8-Lrg|CAA91997.4|Nematoda_Metazoa Caenorhabditis elegans;LGE1;Glycosyltransferase-like protein LARGE (EC 2.4.-.-)
IIGGNFMTR-LMFMQHFKSVLKYSDHF--FRLHLITDENHRSDIHEMTSWEWFNLT-EFEKRVAKYYGLSKLLIPEIIGN-DIGKIMFMDVDIIFQTN-IFDLWKQFRNSQVGMVENLSDWY-LNK-DGKKSVWPALGR--------GFNTGIIMFDKRKNGASKWRVVANKYKTAMSDQDIFNAYIHDYPTEIIQ-IPCA-YNALHFNSQ--YAFFDKIRKASDL----K
>GT8-Lrg|NP_001083457.1|Chordata_Metazoa Xenopus laevis;LRG2A;LARGE xylosyl- and glucuronyltransferase 2-A (EC 2.4.-.-) (Glycosyltransferase-like 1B-A) [Includes: Xylosyltransferase LARGE2-A (EC 2.4.2.-); Beta-1,3-glucuronyltransferase LARGE2-A (EC 2.4.1.-)]
IVCAGHNSS-RDVVTLVKSILFHRRNP--LHLHLITDDVALRVLGNFNTWQIFNAS-ELKPDVAGIYGLLKLTLTKALPS-DLSKVIVLDTDITFATD-IAELWAIFKKEQVGLVENQSDWY-LGNLWKNHKPWPALGR--------GFNTGVILLLKRLIGEEMWRLTAERESTSLADQDIFNAVIKSSPTLVYQ-LPCY-WNVIHWNSPKHVELFRTLYLTSLL----R
>GT8-Lrg|XP_002128775.1|Chordata_Metazoa Ciona intestinalis;-;LARGE xylosyl- and glucuronyltransferase 2-like
IVCAGYTAS-RQVVTLIKSLLFYRTSK--LHVHFIVNGVSRTILRNFQTWVVFQAS-DFIDEVSGVYGLMKLTILTVLPA-NVGKIIVLDTDLIFAHD-VTEIWQYFDKNEAGLVENQSDWY-LGTLWENYTPWPAIGR--------GFNTGLILLDKRAIEQSKWKEVAQTDSTALADQDIINSVLSHNASLLHV-LPCY-WNVIHWNTRRHDENIKSLFRTAFL----R
>GT8-Lrg|XP_002472865.1|Basidiomycota_Fungi Postia placenta;-;Predicted protein
---------------LMKSILMYTSMP--VEFHIVCDEAAQAYLENVRLILVFLLSWDRIDREGGVPGLMKLFIHEILPP-SVPRAIFIDTDALFISD-PALLWDRFAQGAAAIPTHP---------EMSAAEWHHANR---------ICSCIMLLDRRAL-----RLMDSRVDVKLGDQGYWYALVSHRPDLTEH-LGFE-WEMLHFN----------------------
>GT8-Lrg|XP_004365036.2|Capsaspora_Capsaspora Capsaspora owczarzaki;-;Glycosyltransferase-like protein LARGE1
VVCAGFRSV-RMMVPLLKSILFYRTNP--LHLHFVVDEASREPIGTIETWELLDLA-PFESKVAGKFGLIKLVLANILPE-SVTHVLSLDTDLLFMRD-VAHLWGHFSEDQMGLVENQSEWY-IEQEARSSKPWPALSH--------GFNTGVMLLRRRLRADETWLSVAMKETTQLADQDVINAVALTQSSIVYR-LPCT-WNIVHFNSPAFTEYYRHLHATSTL----R
>GT8-Lrg|XP_004644052.1|Chordata_Metazoa Octodon degus;-;xyloside xylosyltransferase 1
-------AR-VALRSLLRLAKFEAHEV--LNLHFVSEEASREVAKALRELKVFDVA-VLTDKVVAGSGFLSVAMHQIMPK-EILRIIQLDLDLKYKTN-IRELFEEFDNDAIGIAREMQPVY-RHTFWQFRQPPPEGLP--------GFNSGVMLLSARQSPYSRLEQVQQLARGHLGDQDFFTMIGMEHPELFHV-LDCT-WNIYHGN----------------------
>GT8-Lrg|XP_005646635.1|Chlorophyta_Viridiplantae Coccomyxa subellipsoidea;-;Hexosyltransferase (EC 2.4.1.-)
-----------------KSLLRNARCP--LHLYILVAEIVRSWLQRRSPWSFTDDG-AVLERLAGYCGLARMFFTEFLPH--EERVLWLDTDTVVNGD-VCQLWPHFDCSQIGF---PGDPT-IPNL---HHPF-------------GLCSCVALMDRRAAGGGSFMAAAEAHSEVFGDQDVLRIVQRHYPDSAYR-LPSG-WNIIHFTCTSMASFGR-------------
>GT8-Lrg|XP_011063367.1|Arthropoda_Metazoa Acromyrmex echinatior;-;PREDICTED: glycosyltransferase-like protein LARGE2 isoform X1
MVCAGYNST-FALVTVVKSILFYRTNP--LHFHLLVDEIARKTLSTFRTWNVFEAE-IWVPRVSGVYGLLKLILPDAMRE-D--KVLVLDTDVTVLTD-MHPLWKMFERDEAGLVENQSNWY-VKALSYGQRPWPALGR--------GFNTGVMLMHRRDRKSRSWENVTKRVETSLADQDVINAVINEQPSIVYK-IECT-WNILHWNSPKHANEFRKLHRVNLL----R
>GT8-Lrg|XP_011880617.1|Arthropoda_Metazoa Vollenhovia emeryi;-;PREDICTED: xyloside xylosyltransferase 1
--------R-RKFQIFTDSLLRYASVN--IAFHVISDDDSRDIAAIIQNVEVYNVH-QLSPHFSDALFFISLGLHRIAPT-HQRLAAMFDADTKFRRD-VKDLFEEFNKEALGLAPELTPVYRVLYLYRNKHPTTMFGEPRHKGGYPGYNSGMVLFNKRKSRKNSVDAITKKYKGHLGDQDFYTLLGMERPELIHV-VDCG-WN---------------------------
>GT8-Lrg|XP_013774124.1|Arthropoda_Metazoa Limulus polyphemus;-;LARGE xylosyl- and glucuronyltransferase 1-like
IVCAGYNSS-RSVVTLIKSILFYRKNP--LHFHFISDSAAQLILQTFYTWDVFLAD-NVQGEVSGVYGLMKLVLTKALPD-VLEKIIVLDTDVTFATD-IAELWRIFHKKQAGLVENQSDWY-LGKLWKNHRPWPALGR--------GFNTGVILLHRREISMQMWRLIAEKESTSLADQDIINAVLKQHPYLIYR-LPCQ-WNVIHWNSPKHVEFFRNLYLTNLL----R
>GT8-GAUT|AAF63140.1|Streptophyta_Viridiplantae Arabidopsis thaliana;GAUT6;Probable galacturonosyltransferase 6 (EC 2.4.1.-)
-HYVVFSDN-VLASSVVNSTISSSKEPERIVFHVVTDSLNYPAISMFLLNTIINID-DMDVL-PSTLNHARFYLPDIFP--GLNKMVLLDHDVVVQRD-LSRLWSIDMKGKVGAVETTWAFGMDLEEWRIRKLTSTYIKYFNLGTKRLTFYRQTALDKRWHVM-----GLGRESGVKAVDIEQAA-------------------VIHYDG----VMKPWLDIGYWNIHV--
>GT8-GAUT|AAF67484.1|Chordata_Metazoa Homo sapiens;GL8D1;Glycosyltransferase 8 domain-containing protein 1 (EC 2.4.1.-)
IPVVIAASEDRLGGAIAINSIQHNTR-SNVIFYIVTLNNTADHLRSLNSDRYINFD-PKLLE-GKPLTFARFYLPILVP--SAKKAIYMDDDVIVQGD-ILALYNTALKPGHAAFSESFNPGVNLTEWKRQNITNQLEKWMKLNVEEIVFYQQHTIDPMWNVR-----HLGSSAGKRPQFVKAAK-------------------LLHWNG----HLKPWGRTAVWEKWY-I
>GT8-GAUT|AAG12603.1|Streptophyta_Viridiplantae Arabidopsis thaliana;GAUT9;Probable galacturonosyltransferase 9 (EC 2.4.1.-)
YHYAIFSDN-VIAVSVVRSVVMNAEEPWKHVFHVVTDRMNLAAMKVFKMRHVISVE-DFKFL-NSMLNHLRFYLPEMYP--KLNKILFLDDDVVVQKD-VTGLWKINLDGKVGAVETAWAFGMDLNAWRREKCTDQYHYWQNLN--EITFYSKTSLDKSWHVL-----GLGYNPGVSMDEIRNAG-------------------VIHYNG----NMKPWLDIALWTKYV-D
>GT8-GAUT|AAK59524.1|Streptophyta_Viridiplantae Arabidopsis thaliana;GAUTA;Probable galacturonosyltransferase 10 (EC 2.4.1.-) (Like glycosyl transferase 4)
YHFCVFSDN-IIATSVVNSTALNSKAPEKVVFHLVTNEINYAAMKAFAINTVVKFE-DFSWL-NSMLNHLRFYIPEVFP--ALKKVVFLDDDVVVQKD-LSSLFSIDLNKNVGAVETGWAFGMDLVEWRKRNVTGIYHYWQEKNV--LTFYGLTALEASWHIL-----GLGY-TNVDARVIEKGA-------------------VLHFNG----NLKPWLKIGLWERYV-D
>GT8-GAUT|AAK93644.1|Streptophyta_Viridiplantae Arabidopsis thaliana;GAUTB;Probable galacturonosyltransferase 11 (EC 2.4.1.-)
YHFCIFSDN-VIATSVVNSTVSNADHPKQLVFHIVTNRVSYKAMQAFLSNAIISVE-EFSWL-NSLLNHLRFYIPEIYP--QLEKIVFLDDDVVVQKD-LTPLFSLDLHGNVGAVETGWAFGMDLIAWRNANVTARYHYWQDQN--RLSFYGLTPLDRRWHVL-----GLGYDVNIDNRLIETAA-------------------VIHYNG----NMKPWLKLAFWLKFL-N
>GT8-GAUT|AAK93659.1|Streptophyta_Viridiplantae Arabidopsis thaliana;GAUT7;Probable galacturonosyltransferase 7 (EC 2.4.1.-) (Like glycosyl transferase 7)
LHFVIISDN-ILASSVINSTVVHARDSKNFVFHVLTDEQNYFAMKQFIRNTVVNIE-KLELD-DSLFSQSHYLLPKLFD--KLEKVVILDDDVVVQRD-LSPLWDLDMEGKVGAVKSLWMSGLDLARWRALGVSETYQKYYKEMSSGLTFQDQVALDDKWALS-----GLGYDYYINAQAIKNAA-------------------ILHYNG----NMKPWLELGYWRRHL-S
>GT8-GAUT|AAL91202.1|Streptophyta_Viridiplantae Arabidopsis thaliana;GAUT5;Probable galacturonosyltransferase 5 (EC 2.4.1.-) (Like glycosyl transferase 5)
YHYVVFSDN-VLASSVVNSTISSSKEPDKIVFHVVTDSLNYPAISMFLLNSIINID-EMNVL-PSALNHARFYLPDIFP--GLNKIVLFDHDVVVQRD-LTRLWSLDMTGKVGAVETTWAFGMDLEEWRRQELTSVYLKYFDLGVKGLTFFGQTPLEKRWNVG-----GLGHESGLRASDIEQAA-------------------VIHYDG----IMKPWLDIGYWNIHV--
>GT8-GAUT|AAM14333.1|Streptophyta_Viridiplantae Arabidopsis thaliana;GAUT4;Probable galacturonosyltransferase 4 (EC 2.4.1.-) (Like glycosyl transferase 3)
YHYALFSDN-VLATSVVNSTITNAKHPLKHVFHIVTDRLNYAAMRMFLDNTIVNVE-EFTWL-NSILNHLRFYLPEIFP--KLSKVLFLDDDIVVQKD-LSGLWSVDLKGNVGAVETGWAYGMDLDEWKRQNITEVYHRWQDLNQDRITFWRRTPLDRKWHIL-----GLGYNPSVNQRDIERAA-------------------VIHYNG----NLKPWLEIGFWSKHV-D
>GT8-GAUT|AAM20549.1|Streptophyta_Viridiplantae Arabidopsis thaliana;GAUTF;Probable galacturonosyltransferase 15 (EC 2.4.1.-)
HHIVLLTDN-VLAASVISSTVQNAVNPEKFVFHIVTDKKTYTPMHAFAINVVVGLH-QYDWP-QALLNHLRIYIPKLFP--DLNKIVLLDDDVVVQSD-LSSLWETDLNGKVGAVVDSWLSGMDLKAWRQTNITEAYSTWLRLSVRSLAFKGLTSLEPSWHVA-----GLGSRSVKSPQEIKSAS-------------------VLHFSG----PAKPWLEISLWYRYV-N
>GT8-GAUT|ABO09884.1|Streptophyta_Viridiplantae Arabidopsis thaliana;GAUTD;Probable galacturonosyltransferase 13 (EC 2.4.1.-)
HHFVLATDN-ILAASVVSSAVQSSSKPEKIVFHVITDKKTYAGMHSFALNIVVSVH-QFDWL-TSLLNHLRIYLPELFP--NLDKVVFLDDDIVIQKD-LSPLWDIDLNGKVGAVETAWAYGMDLRTWRKTNIRETYHSWLKENLKSIAFKGHVPIDSSWHML-----GLGYQSKTNLENAKKAA-------------------VIHYNG----QSKPWLEIGFWTKYV-N
>GT8-GAUT|AID66003.1|Streptophyta_Viridiplantae Arabidopsis thaliana;-;Hexosyltransferase (EC 2.4.1.-) (Fragment)
YHYALFSDN-VLAASVVNSTVMNAQDPSRHVFHLVTDKLNFGAMSMFLLNTIVRFE-DFTWL-NSMLNHLRFYIPRIFP--KLEKILFVDDDVVVQKD-LTPLWSIDLKGKVGAVETGWAYGMDLKEWKKNNITETYHFWQNLNENRITFYNLTPLQRKWHLL-----GLGYDKGIDVKKIERSA-------------------VIHYNG----HMKPWTEMGYWTKYT-N
>GT8-GAUT|BAB02072.1|Streptophyta_Viridiplantae Arabidopsis thaliana;GAUT8;Galacturonosyltransferase 8 (EC 2.4.1.-) (Glycosyltransferase QUASIMODO1)
YHYAIFSDN-VIAASVVNSAVKNAKEPWKHVFHVVTDKMNLGAMQVFKLKHVVAVE-DYTFL-NSILNHLRFYLPEMYP--KLHRILFLDDDVVVQKD-LTGLWEIDMDGKVGAVETAWAYGMDLDAWRREKCTEEYHYWQNLNENRITFYSTTPLDKSWHVL-----GLGYNPSISMDEIRNAA-------------------VVHFNG----NMKPWLDIALWTKHV-D
>GT8-GAUT|BAB09935.1|Streptophyta_Viridiplantae Arabidopsis thaliana;GAUTC;Probable galacturonosyltransferase 12 (EC 2.4.1.-) (Like glycosyl transferase 6) (Protein IRREGULAR XYLEM 8)
FHFVLASDN-ILAASVAKSLVQNALRPHKIVLHIITDRKTYFPMQAFSLHIIVALH-HFDWL-SSLMNHIRIHLPELFP--SLNKVVFLDDDIVIQTD-LSPLWDIDMNGKVGAVETAWAYGMDLAAWRRTNISSTYYHWLDENLKSIAFHGHVTIDPFWHML-----GLGYQETTSYADAESAA-------------------VVHFNG----RAKPWLDIALWAKYL-D
>GT8-GAUT|BAF00667.1|Streptophyta_Viridiplantae Arabidopsis thaliana;GAUT3;Probable galacturonosyltransferase 3 (EC 2.4.1.-)
YHYAIFSDN-VLATSVVNSTVLNAKEPQRHVFHIVTDKLNFGAMKMFRINTIVNIN-DFKWL-NSMLNHLRFYLPEVYP--KLEKILFLDDDIVVQKD-LVPLWEIDMQGKVGAVETGWAFGMDLKEWRKRNITGIYHYWQDLN--EITFYNLTAMDRSWHVL-----GLGYDPALNQTAIENAA-------------------VVHYNG----NYKPWLGLAYWSKYV--
>GT8-GAUT|CAB71043.1|Streptophyta_Viridiplantae Arabidopsis thaliana;GAUT1;Polygalacturonate 4-alpha-galacturonosyltransferase (EC 2.4.1.43) (Alpha-1,4-galacturonosyltransferase 1) (Galacturonosyltransferase 1) (Like glycosyl transferase 1)
YHYALFSDN-VLAASVVNSTIMNAKDPSKHVFHLVTDKLNFGAMNMFLLNTIVNVD-EFKWL-NSMLNHLRFYLPEVYP--KLNKILFLDDDIIVQKD-LTPLWEVNLNGKVGAVETGWAYGMDLKEWKKRDITGIYHKWQNMNENRITFYGLTPLNKAWHVL-----GLGYNPSIDKKDIENAA-------------------VVHYNG----NMKPWLELAYWTKY---
>GT8-GAUT|CAC01746.1|Streptophyta_Viridiplantae Arabidopsis thaliana;GAUTE;Probable galacturonosyltransferase 14 (EC 2.4.1.-)
HHFILSTDN-ILAASVVSSAVQSSSKPEKIVFHIITDKKTYAGMHSFALNIVVGVH-QFDWL-TSLLNHLRIYIPELFP--NLDKVVFLDDDIVVQGD-LTPLWDVDLGGKVGAVETAWAYGMDLQAWRKTNIRETYHSWLRENLKSIAFKGHVIIDSSWHML-----GLGYQSKTNIENVKKAA-------------------VIHYNG----QSKPWLEIGFWTKYV-N
>GT8-GAUT|CAC19667.1|Chordata_Metazoa Homo sapiens;GL8D2;Glycosyltransferase 8 domain-containing protein 2 (EC 2.4.1.-)
IPVVIAAAG-RMGATMAINSIYSNTD-ANILFYVVGLRNTLTRIRKIEHSNFIEFN-PMVLK-GQPLNFVRFYLPLLIH--QHEKVIYLDDDVIVQGD-IQELYDTTLALGHAAFSDSFNPGVNMTEWKHQRITKQLEKWMQKNVEEIVFHGKYTINPLWHIR-----HLGWNPDAREHFLQEAK-------------------LLHWNG----RHKPWDFPSLWESWF--
>GT8-GAUT|CAQ58617.1|Streptophyta_Viridiplantae Vitis vinifera;-;Hexosyltransferase (EC 2.4.1.-)
-HYVIFSKN-VLASTVINSTVMHTEESGNQVFHVVTDGQNYFAMKLFSRNMVVNIE-DLNLD-HSIFSHSHYLLPEIFQ--NLKKVVILDDDIVVQQD-LSALWSINMEGKVGAVEFAWMSGLDLVRWREQDVTGLYRRLVQEVSSMLSFQDLVALDDTWVFS-----GLGHNYHLDTQAIKRAA-------------------VLHYNG----NMKPWLELGYWRKFL-N
>GT8-GAUT|CDP18723.1|Streptophyta_Viridiplantae Coffea canephora;-;Hexosyltransferase (EC 2.4.1.-)
HHVVLLTDN-VLAASVISSAVNSSTHPEKFVFHVVTDKKTYTAMHAFAMNVVVGLH-QYDWS-HSLLNHLRIYIPELFP--DLDKIVFLDDDIVVQHD-LSSLWELDLNGKVGAVVDSWLYGMDLQAWRKTNITATYHQWLKLNLNHLAFEGHMRIDPSWHMA-----GLGHRVSVNKYMLEAAA-------------------VIHFSG----PAKPWLEIGFWYRHV-N
>GT8-GAUT|KGL95275.1|Chordata_Metazoa Charadrius vociferus;-;Glycosyltransferase 8 domain-containing protein 2 (Fragment)
IPVVIAAAG-RMGAAIAISSIYSNTE-ANVLFYIVGLKTTIPHIRKIENSKFVEFN-PMVLK-GQPLNFVRFYLPLLVQ--KHEKVIYLDDDIIVQGD-IQELFDTKLAPGHAAFSDSFNPGVNMTEWKHQRITKQLEKWMQRNVEEIVFHGKYTINPMWHIR-----HLGWSPDAREHFLQEAK-------------------LLHWNG----RYKPWDYPSLWENWF-I
>GT8-GAUT|KJE88426.1|Capsaspora_Capsaspora Capsaspora owczarzaki;-;Uncharacterized protein
IHVIITTDE-HVAGLVLINSISNSAEPGRLQIHLVAAPDAVDAISRLFCTRIVDNP-AMV---GSPANYARFYLADSFT--SLDRVIYLDVDVIVQQD-IADLWNIFANERVALFSGTFNAGVDFVAWRAAQLTTMAEFWMK--QQALILHGRWPFHPKWNVN-----GLGWKEDMDQLDASNAA-------------------LLHWNG----ARKPWLPNGRWSPYV--
>GT8-GAUT|XP_005097020.1|Mollusca_Metazoa Aplysia californica;-;PREDICTED: glycosyltransferase 8 domain-containing protein 1-like
IHVCITSDN-TVGGMVLMNSIVSNTK-SRVKFHLVVDEESMDHLSILMTSSFLAFP-PQWVE-GSPLNYARYYLPRLFP--KLERIIFLDDDCIVQGD-IRELYNTPFKKGHAAFSESFNTGVDLREWDKLNITAQLEYWMELNTKEIVFYNKFAIDPMWHVR-----YLGWTSGTSKKFVAKAK-------------------LLHWNG----KFKPWGRVSVWDRYF--
>GT8-GAUT|XP_007201735.1|Streptophyta_Viridiplantae Prunus persica;-;Hexosyltransferase (EC 2.4.1.-)
YHYAVFSDN-VLASTVVNSTVSTAMEPEKIVFHVVTDSLNFPAVSMFLLNTIVSIE-SFDWL-SSELNHLRFYLPEIFP--ALNKIVLFDHDVVVQKD-LTRLWSINMKGKVAAVETTWAFGMDLQEWRRQNLTTVYHKYLQLGNKRVTFYKKTALDRRWHML-----GLGYESGVVRADIDRAA-------------------VIHYDG----IMKPWLDIGYWSKYV-N
>GT8-GAUT|XP_010942295.1|Streptophyta_Viridiplantae Elaeis guineensis;-;probable galacturonosyltransferase 4
YHYALFSDN-VLAAAVVNSTVFNAKNSESHVFHIVTDRLNYAAMRMFLANTIVNIE-EFTWL-NSILNHLRFYLPEILP--KLNKVVFLDDDIVVQKD-LTALWMIDLKGNVGAVETGWAYGMDLAEWRKQNITEIYHTWQELNH--ITFYNRTALDRSWHVL-----GLGYDPDVNQREIERAA-------------------VIHYNG----NMKPWLEIGYWSKYV-D
>GT12|AAA35516.1|Chordata_Metazoa Homo sapiens;B4GN1;Beta-1,4 N-acetylgalactosaminyltransferase 1 (EC 2.4.1.92) ((N-acetylneuraminyl)-galactosylglucosylceramide) (GM2/GD2 synthase) (GalNAc-T)
IATKTFLRY-DRLRALITSIRRFYPT---VTVVIADDS-DKPER---VS-GPYVEHYLMPFG--KGWFAGRNLAVSQV---TTKYVLWVDDDFVFTRTRLERLVDVLERTPLDLVGGAVREI-SGTTYRQLLSVEPGAPGGNCLRQRTDVVNFFARTDKV-REVG---FDPR-LSRVAHLEFFLDGLGSL-RVGS--CSDVVVD--HASKKRDAGAETYARYRLDESQMAF
>GT12|AAM34756.1|Chordata_Metazoa Homo sapiens;B4GN2;Beta-1,4 N-acetylgalactosaminyltransferase 2 (EC 2.4.1.-) (Sd(a) beta-1,4-GalNAc transferase) (UDP-GalNAc:Neu5Aca2-3Galb-R b1,4-N-acetylgalactosaminyltransferase)
IATKTFLRP-HKLMIMLRSIREYYPD---LTVIVADDS-QKPLE---IK-DNHVEYYTMPFG--KGWFAGRNLAISQV---TTKYVLWVDDDFLFNETKIEVLVDVLEKTELDVVGGSVL----GNVFQFKLLLEQ-SENGACLHKRTSVVNFFAHTERL-QRVG---FDPR-LQRVAHSEFFIDGLGTL-LVGS--CPEVIIG--HQSRPLAALEKTYNTYRTLTRVQFY
>GT12|EAP99589.1|Actinobacteria_Bacteria Janibacter sp. HTCC2649;-;Glyco_trans_2-like domain-containing protein
--VKTFERP-DVLRRCLASVRTVF-D---GRIVVADDS-RVPAK---DL-GPGIDVIAMPFN--SGVSVGRNAALDAV---ETEYVFVTDDDVVFTASDIVAALNFLDHHDVDLVA-----L-TRVDLPRWRAVAAGADAAGAADPKVPTPQLYARTPSI-QAVR---WDER-LRMVDHRDFFSRASGTL-VSVQ--AQTIRAY--HMRTF-------YNAYRVAADLNT-
>GT12|WP_011572713.1|Euryarchaeota_Archaea Haloquadratum walsbyi;-;Glyco_trans_2-like domain-containing protein
VCTTVFKRI-EKLNELLHSI-----D---PEIIIADDG-ECTDR---KD-EIYLEVFDLEFD--SGLGAGRHKIVQES---NEEFILLMDCDMKMPNTH--VLLEQLEDTSIGGVCGAFAES-ERIYTSGCLDIYQDDDINIDIRQNFDIANGAFRRECL-EDYC---WDPE-YVIREHADFYIGHKMQTDKFGL--CPSVHFP--HNPGSHRWSNNKYK-----------
>GT12|XP_005762785.1|Haptophyceae_Protista Emiliania huxleyi;-;Glycosyltransferase, family 2
-------RR-EQLDRLLRSIRRRYAT---AEVIVADDG-CKADRTA-IR-THNVTLVCTEAG--SGLSLGRNTIVRRA---STEFVLLLDDDVVFSATDLAALHDALVRPGAALAGGCYDDL-VRGDADCFNLAFSVTGGGTAVAARVDTHNFFARRSAL-VQHG---WDAR-QKVMEHETFFYAWLHGQ-RVLA--CPAVRVQ--HNTSSSS------------------
>GT12|XP_006823617.1|Hemichordata_Metazoa Saccoglossus kowalevskii;-;Beta-14 n-acetylgalactosaminyltransferase 1-like 538
VVAKTFERY-ECVKRLISSINTFYPN---MTIIVADDS-EKKEE---LT-GSNVKHFLMPFL--EGYAAGKNLVVSQV---RTKYLLMVDDDFVFTETILERFVEKLETAELDLVAGVISNT-KGSEDTSKNGWSEKHEDGGCLFKRKDVINFFAKTEAI-RKVG---FDLV-FERISHREFFVDALGYL-RIAQ--CDDVIIR--HNPQK----TKHYRYYRQTKERSQL
>GT12|XP_007422112.1|Chordata_Metazoa Python bivittatus;-;beta-1,4 N-acetylgalactosaminyltransferase 1
IATKTFLRY-DKLRTLIDSIRKFYPT---VTIIIADDS-LDIER---VQ-GPHIEQYFMPFG--KGWFAGRNLAISQV---TTKYVLWVDDDFIFTRTKVEKLVDVLEKTSLDLVGGAVREI-TGNTYRQQISVQPGGEDGDCLRTRTDVINFFARTEKV-LQVG---FDPR-LNRVAHLEFFIDGLGIL-HVGS--CSNVVVD--HASKK-SVSEKQYAKFRSDDSMYTY
>GT13|AAA75523.1|Chordata_Metazoa Homo sapiens;MGAT1;Alpha-1,3-mannosyl-glycoprotein 2-beta-N-acetylglucosaminyltransferase (EC 2.4.1.101) (N-glycosyl-oligosaccharide-glycoprotein N-acetylglucosaminyltransferase I) (GNT-I) (GlcNAc-T I)
ILVIACDRS--TVRRCLDKLLHYRPSAELFPIIVSQDCGHEETAQAIASYGSAVTHIRQPDLSSYKIARHYRWALGQVFRQRFPAAVVVEDDLEVAPDFF-EYFRATYPLWCVSAWND-----NGKEQMVDASPELLYRTD------FFPGLGWLLLAELWAEL----EPKWP--KAFWDDWMRRPEQRQGRACIR-PEISRTM--TFGGVHGQFFDQHLKFIKLNQQFV-
>GT13|AAD03022.1|Nematoda_Metazoa Caenorhabditis elegans;MGAT1;Putative alpha-1,3-mannosyl-glycoprotein 2-beta-N-acetylglucosaminyltransferase (EC 2.4.1.101) (N-glycosyl-oligosaccharide-glycoprotein N-acetylglucosaminyltransferase I) (GNT-I) (GlcNAc-T I)
VLVFSCNRA-MAVRDHVEKLIRYRPSQEKFPIIVTQDCDNENVKNEVKKFGDKVEYIKHLAGDKYRIARHYKLALNHVFVDGYSSVIITEDDLDISPDFF-SYFSSTRYLWCVTAWND-----NGKQENIDMTASTLYRSD------FFAGLGWMMSSKTWHEL----EPIWP--VGFWDDWMRDPARRKDRQCIR-PEISRTG--MMGGAKGQFFSKHLAKIKVNDKYIK
>GT13|AAD03024.1|Nematoda_Metazoa Caenorhabditis elegans;-;GLYcosylation related (UDP-N-acetylglucosamine:a-3-D-mannoside b-1,2-N-acetylglucosaminyltransferase I) (EC 2.4.1.101)
VIVFSCNRP-DSVRAHVEKLIMYRPSAQQFPITVSQDCDNESVKKEVEKFGNSVNYVKHPPGESYYISRHYKLALNHIFNSNYSSVIITEDDLDIAPDFF-SYFSNTRYLWCVTAWND-----NGKPENIDKSNATLYRSD------FFAGLGWMMTRKTWEEL----EPIWP--NGFWDDWMREPVQRKQRQCIR-PEISRTG--MMGGTKGQFFSDHLEKIKVNDLPV-
>GT13|AAF57454.1|Arthropoda_Metazoa Drosophila melanogaster;-;Alpha1,3-mannose beta1,2-N-acetylglucosaminyltransferase 1 (LD23909p) (MIP20248p) (Mannosyl (Alpha-1,3-)-glycoprotein beta-1,2-N-acetylglucosaminyltransferase) (EC 2.4.1.-) (EC 2.4.1.101)
VVVFACNRV-S-VKKCIDNLVQYRPSVEQFPIIVSQDCGDEPTKEAILSYGKQVTLIEQPDLSDYKIARHYGWALNTTFAVGFEFVIIVEDDLNVAPDFF-EYFLGTHKLWCVSAWND-----NGKAAVVDAAPELLYRTD------FFPGLGWMLTKDLWAEL----SVKWP--KSFWDDWIRHPAQRKDRVCIR-PEISRTR--TFGGVNGLFFDKYLKHIKLSEDFVN
>GT13|AAN15653.1|Streptophyta_Viridiplantae Arabidopsis thaliana;MGAT1;Alpha-1,3-mannosyl-glycoprotein 2-beta-N-acetylglucosaminyltransferase (EC 2.4.1.101) (N-acetylglucosaminyltransferase I) (GlcNAcT-I) (N-glycosyl-oligosaccharide-glycoprotein N-acetylglucosaminyltransferase I) (Protein COMPLEX GLYCAN LESS 1)
VVVMACSRA-DYLERTVKSVLTYQPVASKYPLFISQDGSDQAVKSKSLSYN-QLTYMQHLDFEPYKIARHYKWALDQLFYKKFSRVIILEDDMEIAPDFF-DYFEAAASIMAASSWND-----NGQKQFVHD-PYALYRSD------FFPGLGWMLKRSTWDEL----SPKWP--KAYWDDWLRLKENHKGRQFIR-PEVCRTY--NFGGSLGQFFSQYLEPIKLNDVTVK
>GT13|BAB71960.1|Chordata_Metazoa Homo sapiens;PMGT1;Protein O-linked-mannose beta-1,2-N-acetylglucosaminyltransferase 1 (POMGnT1) (EC 2.4.1.-) (UDP-GlcNAc:alpha-D-mannoside beta-1,2-N-acetylglucosaminyltransferase I.2) (GnT I.2)
VAVIAGNRP-NYLYRMLRSLLSAQ-GVSPQMITVFIDGYYEEPMDVVALFG--LRGIQHTPISIARVSQHYKASLTATFNLEAKFAVVLEEDLDIAVDFF-SFLSQSIHLYCISAWND-----QGYEHTAED-PALLYRVE------TMPGLGWVLRRSLYEEL----EPKWP--TWDWDMWMRMPEQRRGRECII-PDVSRSY--HFGGLNGYFHEAYFKKHKFNTVPG-
>GT13|CCD71300.1|Nematoda_Metazoa Caenorhabditis elegans;-;GLYcosylation related (UDP-N-acetylglucosamine:a-3-D-mannoside b-1,2-N-acetylglucosaminyltransferase I) (EC 2.4.1.101)
VLVFCATRP-DALRNHLSQILAQRPSHFQYHIIVSQDGNKTAVTQVAQKFVKNVSHIQHEKTEIPAISAHYKWALDKAFKGRYDHVIVTEDDLDIGNDFF-SYFRWGKQIWCVSAWND-----NGGGPLIDSTGDLIWRTD------FFPGLGWMLTKKLWNEL----SPGFP--VAYWDDWMRKPEVRKSRSCIR-PEISRTS--HNMGS-GGMFKDYLSKISASSANIK
>GT13|EPZ34122.1|Cryptomycota_Fungi Rozella allomycis;-;Glycosyl transferase, family 13 domain-containing protein
ILMFGCNRP-S-IKRALESLLAVRREIDQHPIYVSLDCKHTETIESVKAFGDAVNFWDHQEELAYAISFHYKYALKRLFGTDYEQVIIVEDDFEFSPDFL-SYFRAMLPLYCVSSWND-----NGKNELINDERKLIFRTD------FFPGLGWMMTRELWNEI----EGKWP--AAFWDDWLREPENRNSRQCIV-PEVSRTS--NFGGTNGQFYDSHIRHVVKQDGFY-
>GT13|KDR22711.1|Arthropoda_Metazoa Zootermopsis nevadensis;-;Protein O-linked-mannose beta-1,2-N-acetylglucosaminyltransferase 1
VAIIASNRP-HYLYRMLRSLLSAH-GANPEMITVFIDGYFEEPLEVTKLFG--LRGIQHTPIGVARISQHYKATLTATFNIPAKHAIVLEEDLDVSPDFF-SYFSQTLRLYCISAWND-----QGYEHTSDD-PSLLYRVE------TMPGLGWLLKRSLYKEL----EFKWP--TWDWDMWMRLPEVRKGRECVI-PDVSRTY--HFGGLNSYFQDVYFKKHSFNTQPS-
>GT13|KFM66432.1|Arthropoda_Metazoa Stegodyphus mimosarum;-;Alpha-1,3-mannosyl-glycoprotein 2-beta-N-acetylglucosaminyltransferase (Fragment)
VLVFACNRV--TVKRNLDQLLKYRPSPEQFPIIVSQDCGHEPTTRVIQSYGDQLTLIQHPDQSDYKIARHYGWALNQTFFHNYKTVIIVEDDLDIAPDFF-EYFLATHPLWCVSAWND-----NGKDSLVAYEPELLYRSD------FFPGLGWMLTKSLWREL----APKWP--KAFWDDWIRQPAQRKERACIR-PELSRTK--TFGGVNGLFYEKHLKFIKLNDKAV-
>GT13|KOO23508.1|Haptophyceae_Protista Chrysochromulina sp. CCMP291;-;Alpha-1,3-mannosyl-glycoprotein 2-beta-n-acetylglucosaminyltransferase-like protein
VVVIAYNRP-QYLDEALKSINASHPGGSSFPVYVSQDGENGPVTNVVLKYGYRSLVHPRKILSFAYLSVHYGWALRTLFGMPYAGVIILEEDIRVSTDFF-AYFEAAAPLLCVSAFND-----NGQDAFPGD-PRALHRSD------FFPGLGWLLSRRLWDEL----RPKWP--EAFWDDWLRETPQRKGRASIR-PEVSRTV--TFGGTVGQFYQKYLAKISLNVRKV-
>GT13|NP_500183.2|Nematoda_Metazoa Caenorhabditis elegans;-;Uncharacterized protein
ILVASGLAP-DSLRITLESLLN-QEGLNTQMVLVTYDKEYSENADLVSLF-----HVKSVAI--GSYNAHLLLSLSNAFSIDASSVLVIEEDVTLSTDWL-HYFSSIYEVDLALAFNS-----NGFIDTSGDG-QTVYRIK------NHLPIGYLMKRDLYE---------------------------------------------------------------------
>GT13|WP_003000165.1|Bacteroidetes_Bacteria Sphingobacterium spiritivorum ATCC 33861;-;Uncharacterized protein
VVLFVYNRP-LHTEQTLAALEK-NLLASESDLFIYADGARNKEAETQVAAVSKIIHRVWP----TIIQRNRNWGLGVTTIIKYGKVIVLEDDLKTAPNAL-QYFNDALNVMSVSGYNY-----PLKE------ADTLPETF------FFNSWGWATWDRAWKHF----NPD-----------IESMVQQLNQEQI--------Y--QFSGKNFWRQVQQFRKGKINSWAI-
>GT13|XP_002608981.1|Chordata_Metazoa Branchiostoma floridae;-;ILEI domain-containing protein
VAVIASNRP-GYLYRMLRSLLSAH-GANPNMVTVFVDGFFEEPMEVVKLFG--VRGIQHTPIGVARISQHYKASLTASFNLKANYVIVVEEDLDVSVDFF-SYFSQTLPVYCVSAWND-----QGYEHSCGD-PTLLYRVE------TMPGLGWILKRSLYKEL----EPKWP--TWDWDMWMRLPENRKGRECII-PDISRTY--HFGGLNSYFQELYFKKHLINTVPN-
>GT13|XP_004363508.1|Capsaspora_Capsaspora Capsaspora owczarzaki;-;Alpha-1,3-mannosyl-glycoprotein 2-beta-N-acetylglucosaminyltransferase
VLVIACNRP-DMV-RCVDRLLKFRPS-ERFPIIISQDCGDASTAATIREYGNQVIHVMQPELEIYKISRHYKWALTQVFDVFFNSVIIVEDDLEISEDFF-DYFAAGRQLWCVSAWND-----NGKSEFVSSAKK-LYRTD------FFPGLGWMLTRGVWSEL----SSKWP--KAFWDDWMREPAQRANRACIR-PDISRVS--NFGGVAGQFFYDHIAKIKRPTETVP
>GT13|XP_009420830.1|Streptophyta_Viridiplantae Musa acuminata;-;PREDICTED: alpha-1,3-mannosyl-glycoprotein 2-beta-N-acetylglucosaminyltransferase
VVIMACNRP-DYLERTIESVLKYQRSATKFPLFVSQDGTNSDVKSKAMSYN-QLTYMQHLDFEPYKIARHYKWALDELFFNNFSRVIILEDDMEIAPDFF-DYFEATAAIMAVSSWND-----NGQKQFVHDS-YALYRSD------FFPGLGWMLTKTIWDEL----SPKWP--NAYWDDWVRLNEVHKDRQFIR-PEVCRTY--NFGGSMGQFFRQYLEPIKLNDVQV-
>GT13|XP_009462434.1|Chordata_Metazoa Nipponia nippon;-;Alpha-1,3-mannosyl-glycoprotein 2-beta-N-acetylglucosaminyltransferase (Fragment)
VLVMACDRS--TVRRCLDKLLRYRPSAQRFPIIVSQDCGHAETARVIASYGDAVAHIRQPDLSDYKIARHYRWALGQVFRTRYRAAIVVEDDLEVAPDFF-EYFQAAFPLWCVSAWND-----NGKEQMVDVGAELLYRTD------FFPGLGWLLLAELWDEL----EPKWP--RAFWDDWMRQPEQRRDRSCIR-PEVSRTM--TFGGVHGQFFDQYLKFIKLNDRFV-
>GT13|XP_011397695.1|Chlorophyta_Viridiplantae Auxenochlorella protothecoides;-;Alpha-1,3-mannosyl-glycoprotein 2-beta-N-acetylglucosaminyltransferase
VVMVTFDRA-EYLARALESMLHVHDNQLRFPLYISQDSDAPGVQEVIEQHLDKLRYLQHREVAPYRIANHYKFIFQTFFDCGFARLIILEDDMLLAPDFF-PYFLGLGRLYCVSSWND-----HGQSKFVRDQHT-LHRTD------FFPGLGWMTNAGVWTSI----REAWP--PAYWDDWMRLNSTRQGRQCIR-PEVSRTY--NFGGSKGQYFRTFLKPVTLASEAI-
>GT14|AAA35919.1|Chordata_Metazoa Homo sapiens;GCNT1;Beta-1,3-galactosyl-O-glycosyl-glycoprotein beta-1,6-N-acetylglucosaminyltransferase (EC 2.4.1.102) (Core 2-branching enzyme) (Core2-GlcNAc-transferase) (C2GNT) (Core 2 GNT)
YSIVVHHKI-EMLDRLLRAIYMP--QNF-YCV-HVDTKSEDSYLAAVMGI-ASFSNVFVASRLESRVQADLNCMKDLYAMSNWKYLINLCGMDFPIKTNLEIVRKLLLMGENNLETER-----EERWKKRYEVVNG-----------LFSGSYFVVSREYVGVL------QNEDTYSPDEYLWATIVPGSLRFVKWQKHHLFA---NKFVD-----VD-------------
>GT14|AAA81777.1|Chordata_Metazoa Homo sapiens;GNT2A;N-acetyllactosaminide beta-1,6-N-acetylglucosaminyl-transferase (N-acetylglucosaminyltransferase) (EC 2.4.1.150) (I-branching enzyme) (IGNT)
YIMVIHHHF-DTFARLFRAIYMP--QNI-YCV-HVDEKAT-EFKDAVEQL-LSFPNAFLASKMESRLQADLNCIRDLSAFESWKYVINTCGQDFPLKTNKEIVQYLGFKGKNITPG----------VLPPAHAIGRTKYVHQEHLGKIYFGSYVALSREFANVLH--------DTFSPDEHFWVTLGVPGSRAIKWSSPSLFA---NKFLN-----TYP------------
>GT14|AAB66233.1|Nematoda_Metazoa Caenorhabditis elegans;-;Uncharacterized protein
-------DY-EFIEKQVQASYHP--QNV-FCF-AIDANS-AEFQRKMKKL-EQLPNVVVLPVTENINLAHYNCMKK-LESLGWGYLMLLQNHDVITKSVYELDRIFLLGGVNDV-FMSRE-----------IPERRKKHL------KISSGSHSSLSRAAVKLVE---EVD--DQWGADEQFISTFQMSPD----------------------------------------
>GT14|AAC26306.2|Nematoda_Metazoa Caenorhabditis elegans;-;Uncharacterized protein
---IVYTDY-EMIEKQVQMSYHP--QNS-FCF-AIDKKASQ-FHERLRAM-AALPNVLLLPDEENINLAHYNCLRVLINK-GWNYAILLQNHDVIVKSVYEIEQIYWLGGANDIEITP---EAFKWDPVSLKMFRNETGIDKNVL--FAKGAQGSLSRGAVDMVR---TVD--NQWGVDEQFIQSF---------------------------------------------
>GT14|AAD10824.1|Chordata_Metazoa Homo sapiens;GCNT3;Beta-1,3-galactosyl-O-glycosyl-glycoprotein beta-1,6-N-acetylglucosaminyltransferase 3 (EC 2.4.1.102) (EC 2.4.1.148) (EC 2.4.1.150) (C2GnT-mucin type) (C2GnT-M) (hC2GnT-M) (Core 2/core 4 beta-1,6-N-acetylglucosaminyltransferase) (C2/4GnT)
YSMVIHEKI-ENFERLLRAVYAP--QNI-YCV-HVDEKSET-FKEAVKAI-ISFPNVFIASKLVSRVQADLNCMEDLLQSSPWKYFLNTCGTDFPIKSNAEMVQALMLNGRNSME-SEVPPKHHEVVRDTLHLTNKKKD--------MFTGNYIVASRDFVQVLK------NPDTYSPDEHLWATLVPNHPRLVKWQNHHLLA---NKFPK-----VDDNAL---------
>GT14|AAD14462.1|Streptophyta_Viridiplantae Arabidopsis thaliana;-;Core-2/I-branching beta-1,6-N-acetylglucosaminyltransferase family protein (Glycosyltransferase) (Putative glycosylation enzyme)
YLISGTKDS-LRMMRTLQAVYHP--RNQ-YVL-HLDLEAPKERLE-LAMS-VRVENVRVMSQSNTMIACTLQAVAILLKESDWDWFINLSASDYPLVTQDDMLYVFNSRNVNFIEHMK-----NQRAKSIIVLYLSKKTEIA-----LFTGSWVVLTRSFLESIL---GW-DNNFVSSPEGYFHTLICNTEHYIAWDSKAPFA---RKF-H-----KNDPVLD-K-----I
>GT14|AAF03464.1|Streptophyta_Viridiplantae Arabidopsis thaliana;-;Core-2/I-branching beta-1,6-N-acetylglucosaminyltransferase family protein (Glycosyltransferase) (T12J13.3 protein)
YLISASKDA-GKLKRLLRSLYHR--RNH-YLI-HLDLEAEEEHLEMIRFL-FQEGNVMIVGKPNTMLATTLHAMALLLR-CRWDWFINLSASDYPLVTQDDLIYAFEPRDLNFIQHTSR----NKRGKP-IIIDPGLYSLNKSEIW-LFTGSWTFLSRPFAECII---GYD-NNFVSSPEGYFQTLICNSEHYIAWDSNRPFA---RKFS-------NDPVLN-R-----I
>GT14|AAF26009.1|Streptophyta_Viridiplantae Arabidopsis thaliana;-;unknown protein; 33908-32196
YYITGGGDN-DRISRLLLAVYHP--RNR-YLI-HLGAEADAERLALLSDLKVNFGNVDVLGKVDSKIASTLHAVSILLKLDTWNWFIELSALDYPLITQDDLSHVFVNRSLNFIDHTSD----SQRIKPIVVLYLARRTQLFT----VFTGSWIVLSRPFLECIF---GW-DNNVILSEECYFHTVICNAPRYMIWDSGAAFA---RQF-K-----KDDPVLD-M-----V
>GT14|AAF34844.1|Streptophyta_Viridiplantae Arabidopsis thaliana;-;AT3g15350/K7L4_15 (Core-2/I-branching beta-1,6-N-acetylglucosaminyltransferase family protein) (Glycosylation enzyme-like protein) (Glycosyltransferase)
YLVSGSKDV-EKLWRTLRAVYHP--RNQ-YVV-HLDLESVNERLELASRINYSTGNVYMITKANTMVANTLHACAVLLKRNNWDWFINLSASDYPLVTQDDLLHTFTDRNLNFIEHTSQ----EKRAQPLMI------DPGLYLLNKLFTGSWMALSRPFVECIW---GW-DNNFVSSPEGYFQTVICNVPHYISWDSGAAFA---RKF-R-----RDDEVLN-K-----I
>GT14|AAF63156.1|Chordata_Metazoa Homo sapiens;GCNT4;Beta-1,3-galactosyl-O-glycosyl-glycoprotein beta-1,6-N-acetylglucosaminyltransferase 4 (EC 2.4.1.102) (Core 2-branching enzyme 3) (Core2-GlcNAc-transferase 3) (C2GnT3)
YSLVVHKDA-IMVERLIHAIYNQ--HNI-YCI-HYDRKADT-FKVAMNNL-AKFSNIFIASKLESRLQADLNCLSDLLKSSQWKYVINLCGQDFPLKSNFELVSELKLNGANMLETVKPPNSKLRRVPYEYVKLPIRTNISKE----IFVGSYFVLSQAFVKIF---------DTYSPDEHFWATLIRISRRLVKWNDGHWFA---NKFSK-----VDP------------
>GT14|AAF86534.1|Streptophyta_Viridiplantae Arabidopsis thaliana;-;Core-2/I-branching beta-1,6-N-acetylglucosaminyltransferase family protein (F21B7.14) (Glycosyltransferase) (Putative glycosylation enzyme)
YLISGTKDS-HRMMRTLQAVYHP--RNQ-YVL-HLDLEAPRERME-LAMS-VRMENVRVMAQSNTMIACTLQAVSILLRESHWDWFLNLSASDYPLVTQDDLLYVFNSRNVNFIE------NMNQRAKSIIVDPALYLSKKSDIA--LFTGSWIMLTRSFLECIW---GW-DNNFVSSPEGYFHTVICNSEHYIAWDSKAPFA---RKF-H-----KNDPALD-K-----I
>GT14|AAK31555.2|Nematoda_Metazoa Caenorhabditis elegans;-;Uncharacterized protein
----VYKDY-EFLEKQVQMSYHP--QNI-FCF-FIDSKSD-DFKWRIRRL-GRLPNVFVIDEELNMNLAHYKCMEKMVKL-DWDYFILMQNHDVVGKSVYEISRIFILDGANDIDID------FGRIDESLKWDLKTLRLFRD--ESVSKGSQGSLSRAAVEMVK---TVN--GAYGVDEQWISTFQAN------------------------------------------
>GT14|AAK68509.3|Nematoda_Metazoa Caenorhabditis elegans;XYLT;Xylosyltransferase sqv-6 (EC 2.4.2.26) (Peptide O-xylosyltransferase) (Squashed vulva protein 6)
FLLQLNGNE-RQVKRFLKSIYLP--HHY-YYI-HVDARQYMF--SEMQKV-ADLDNIHITERRFSLLQMFLQVIRDSMKKFDWDYIINFSESDFPILPISDFERLIVNNGKSFLASHGYNTGK-------------QKQGFEYVFSEIDGGSWVGIHRNLAESIS-----DEESILLPLESFYHTLAFNSERLTNWYKPTYFA---RKFSM-----VDID-----------
>GT14|AAK94757.1|Nematoda_Metazoa Caenorhabditis elegans;-;GLY-1 (GLYcosylation related)
YGLVVYKTI-VQVLTQMSLFYQP--QHM-FCI-TVDDQSN-EYKSVIQAL-PSFPNMHFIGEPSGILKNVYTCFNWLSKSKKWKYYQYLSGTDLPIRTNLEMVRIFALNG---------SMNT--------------STFEVDRYKNVYKSSSVVVPREGADLIS--------KTWIPDESFWSTVL--------------------------------------------
>GT14|AAK94760.1|Nematoda_Metazoa Caenorhabditis elegans;-;GLY-16 (GLYcosylation related)
YGLLVYKEL-SQVLFMLSSIYQP--QNE-YCI-AV-GENASTFLILLEEL-SDFPNVHFM-KRPEIINSVYDCLKFLSHLKNWKYFQYLSGVDIPLKTNLEMVRILSLNGTANVE-IKVYENRTE----------------------LFKSSSSLIPRKAANL------ASSSNTWVADEGFWGTLFGNKGNFEEW-----------------------------------
>GT14|AAK94766.1|Nematoda_Metazoa Caenorhabditis elegans;-;GLY-19 (GLYcosylation related)
YGMLVYKDL-PQVLFLLSSIYHP--QNE-YCI-AVGENSPI-FQNLLREV-STFSNVHFM-KRPEIIDSVYDCLEFLSHLEDWRYFQYLSGVDIPLKTNLEMVQILHLNGTSNVEITNYQQARNE----------------------LFKSSSAIIPRKAANL------ASSNNTEIADEGFWGTLFGNKDYYISWDSKALVA---HKF----------------------
>GT14|AAM14996.1|Streptophyta_Viridiplantae Arabidopsis thaliana;GT14C;Beta-glucuronosyltransferase GlcAT14C (EC 2.4.1.-) (GT14 family glucuronic acid transferase 3) (AtGlcAT14C)
YLVTGTKDG-KRVKRLLKAIHHP--RNY-YLL-HLDLEADEERME-LAKY-VRFENVMVMGLADTMLASTLHGVAILLKKADWDWFINLSASDYPLMPQDDILHIFYPRYLNFIEHTSN----NQRARPIIIFYHLKKSGVF-----LFMGSSVALTRPFLECIW---GW-DNNFLLSSEGYFQTVVCNKDHYTKWDSGAPFA---REFE-------DDLVLD-K-----I
>GT14|AAT71946.1|Streptophyta_Viridiplantae Arabidopsis thaliana;-;At1g53100 (Core-2/I-branching beta-1,6-N-acetylglucosaminyltransferase family protein)
YLVSGSKDL-ESLWRTLRALYHP--RNQ-YIV-HLDLESVDER-SELASR-ISAGNVYMITKANTMVANTLHACAILLKRTDWDWFINLSASDYPLVTQDDLIHTFTDRNLNFIEHTSS----KKRAMPLII------DPGLYMLNKLFT--WMALSHAFVEIIY---GW-DNNFVSSPEGYFHTVICNVPHYIAWDSGSAFG---RKF-R-----RNDTVLD-K-----I
>GT14|BAB03022.1|Streptophyta_Viridiplantae Arabidopsis thaliana;-;Core-2/I-branching beta-1,6-N-acetylglucosaminyltransferase family protein (Glycosyltransferase)
YLISGSGDT-RRILRLLYATYHP--RNR-YLL-HLDSLAQSER-DRLAVD-VQVPNVDVIGKPDSPMASTLHGASILLRLSTWDWFVSISVDDYPLVTQDELLHIMHPKDLNFVNHTSY----SRKLKPVIVLYLVEKTDMF-----LFSGPFSILSRNFMECVL---GT-DNNTPDSLSNYFPTILCNTDLYLASNSGAAFA---RGF-R-----YDDTVLD-R-----I
>GT14|BAB10223.1|Streptophyta_Viridiplantae Arabidopsis thaliana;GT14A;Beta-glucuronosyltransferase GlcAT14A (EC 2.4.1.-) (GT14 family glucuronic acid transferase 1) (AtGlcAT14A)
YLISGSGDG-KSLRRTLLALYHP--NNR-YVV-HLDRESREEREEYIKSL-FRFMNVHMIEKANTMVANTLHAAAILLREGDWDWFINLSSSDYPLVTQDDLLHIFHPRDLNFIDHTSN----SQRAKPVIILYLNKKSDVF-----LFTGSWMALSRPFVDCIW---GW-DNNFLSSPEGYFHTVLCNAEHFISWDSNAPFA---RKFRE-------DPVLD-K-----I
>GT14|BAD18395.1|Chordata_Metazoa Homo sapiens;GCNT7;Beta-1,3-galactosyl-O-glycosyl-glycoprotein beta-1,6-N-acetylglucosaminyltransferase 7 (EC 2.4.1.-)
YIITIHKEL-AMFVQLLRAIYVP--QNV-YCI-HVDEKA-MKYKTAVQTL-VNFENVFISSKTETRLQADINCMKVLVHSKQWNYVINLCGQDFPIKTNREIIHYIKWSDKNITPG----------VIQPLHIKSKTSQSHLEFVPKIYFGSYYVLTRKFVEILT------DIDIRSPEQHYWVTLLKDAPRAIKKSSPSLFA---NKFPS-----TDPLVV---------
>GT14|CAA18374.1|Nematoda_Metazoa Caenorhabditis elegans;-;Uncharacterized protein
-------EY-EFIEKQVQAAYHY--QNW-FCF-AVDRNSI-EFQKKMKQL-AELPNVILLPVTENINSAHYRCMMELVTR-GWSYLVLLQNFDLITKSVYEMDRIFLLDGANDVN--------PGRRKPNLKWDL----KTLKLFRNISTGYQASLSRAAAQLIN---DVD------------------------------------------------------------
>GT14|CAA21769.2|Nematoda_Metazoa Caenorhabditis elegans;-;GLYcosylation related
YGMLVHGDF-VQLSLLLSAIYQP--QNQ-FCL-AVDGNSV-EFIGLVRML-SRYGNIYFIT--DEILTSVFQCVDYLAKLPDWKYFQYLSGVDAPLKSNLEMIRILALNG-SF--------NAFYRLNR------------------LYKTSSATFSRKSANMV------NSEGTTCADESLWATIAGN------------------------------------------
>GT14|CAA95817.2|Nematoda_Metazoa Caenorhabditis elegans;-;GLYcosylation related
YGLLVYKEL-SQVLFMLSSIYHP--QNE-YCI-AVGENSPI-FQNLLKEL-SNFSNIHFM-KRPEIINSAYDCLEFLSHLKDWRYFQYLSGVDIPLKTNLEMVQILHLNGTANVEIKPY----YQRL-------------------RLFKSSSSLIPREAANL------SSSSNTGIADEGFWGTLFGNKSTYQIWSSKALVA---HKF----------------------
>GT14|CAB00115.2|Nematoda_Metazoa Caenorhabditis elegans;-;Uncharacterized protein
-------------EALLSISYHP--DNV-FCF-VMDSKSDR-LKESVRIM-SSFTNVVVLGKEYGQDPAHFDCLKTIL--DKWDHAIILQNFDLIIKTPYQLSDISSLNYTSIMGFDHGFSYRKAKWTPGMKLFKIETGVPNEILNRVFVKSFEKLN---MDIIK---LFDDN---GVDEMLVQTLYEN------------------------------------------
>GT14|CAB03022.1|Nematoda_Metazoa Caenorhabditis elegans;-;Uncharacterized protein
----------------LSISYHP--DNY-FCY-AMDSKS-EKLKKSMRIM-ADFENVIVLDKEYKQDAAHFDCLKQIL--DHWSHAITLQNFDLIIKSPKQLSDL-----SEILNYTS------------YGFTSRYRT-----FEDIRKSLEVILSKVFVKLFD---KVNLQTLFGVDEMMVMTLFEN------------------------------------------
>GT14|CAB03536.2|Nematoda_Metazoa Caenorhabditis elegans;-;Uncharacterized protein
---IVYKDY-ELVEKQVQMSYHP--QNS-FCF-AIDKKATR-FKNQMRAM-AALPNVLLLPDQENVNLAHLNCLRALINK-GWNYAMLLQNHDLLTKSVYELEQVYWLGGANDVELLP-----------------------------------------------------------------------------------------------------------------
>GT14|CAB03539.2|Nematoda_Metazoa Caenorhabditis elegans;-;Uncharacterized protein
---IVYKDY-EFIEKQVQVSFHP--QNA-FCF-VIDINA-EEFKKRMRAL-AAMPNVIVLADEDNVNLVHNKCLKALLD-IGWNYALLLQNHDLIMKSVYEMEQIFWLGGANFVTHE------VKKLK----------------WDPIVKGWHCSLSRASVEMFQ---KLDPSYGV--DEQYFPILQANAE----------------------------------------
>GT14|CAB04185.3|Nematoda_Metazoa Caenorhabditis elegans;-;Uncharacterized protein
-------DY-EFIEKQVQASYHP--QNF-FCF-AVDANS-AEFQKRMKAL-ERLPNVFVLPVTENINLAHYNCMKR-LEASGWGYLMLLQNHDVITKSVYELDRIFLLAGANDV-FMSKEIPG-----------RRNKHS------KLEISSFVSLSRAVVELVN---EVDVSE-YGADEQFISTFQSNQD----------------------------------------
>GT14|CAB04881.3|Nematoda_Metazoa Caenorhabditis elegans;-;Uncharacterized protein
-------DY-ELIEKHVEMSYHP--QNS-FCF-AIDKKAAKEFKERMQAM-ASLPNVLLLPDDLNTNLAHYNCLRALINK-GWNYAILLQNHDLITKSVYELEKIFWLGGANDVAIRPE----KKHFK----------------WDPFAKGAQSSLSRAAVDMTR---TVD------------------------------------------------------------
>GT14|CAB05168.1|Nematoda_Metazoa Caenorhabditis elegans;-;Uncharacterized protein
-------DY-EFIEKQVQMSWHP--DNV-FCF-VIDTKS-KEFKMNMKKL-DDFENIIVLPAEHNQNLGHTECMQSLLQ-FNWTYLLLLQNHDVISKSVYELARIYILGGANDVN--------DQRRVPGLKWDAKN----LKLFRNIASGYQASLSRAAVELIN---TVDLTTKYGGDEQLISSFQVNSQ----------------------------------------
>GT14|CAB05621.2|Nematoda_Metazoa Caenorhabditis elegans;-;GLYcosylation related
FGLLVYKEL-SQVLFLLSSIYQP--QNE-YCI-AVGENSPA-FLILLKEL-ANFPNVYFM-KRPEIINSVYGCLEFLSHLKDWKYFQYLSGVDIPLKTNLEMVRILRLNGTVNIGISTYE---------------------------LFKSSSSLIPRKAANL------SSSSTTWVADEGFWGTLFGNKDRHQLWVSRALVA---HK-----------------------
>GT14|CAB63368.1|Nematoda_Metazoa Caenorhabditis elegans;-;Uncharacterized protein
-------DY-EFIEKQVQMSWHP--DNV-FCF-VIDTKS-KEFKTNMKKL-ADFENIIVLPSKHNQNLGHTECMQSLLQ-FNWTYLLLLQNHDVISKSVYELARIFILGGANDVN--------DQRRVPGLKWD----PKNLKLFRNIASGYQASLSRAAVELIN---TVDLTTKYGGDEQLISSFQVNSQ----------------------------------------
>GT14|CAC01824.1|Streptophyta_Viridiplantae Arabidopsis thaliana;GT14B;Beta-glucuronosyltransferase GlcAT14B (EC 2.4.1.-) (GT14 family glucuronic acid transferase 2) (AtGlcAT14B)
YLISGSGDG-QMLKRTLMALYHP--NNQ-YVV-HLDRESPEERL-DLSGF-VQFQNVRMIVKANTMVANTLHAAAILLREGDWDWFINLSASDYPLVTQDDLLHTFYPRDLNFIDHTSN----SHRAKPIIIDPGLYMSKKADVF--LFTGSWMMLSRPFVDFIW---GW-DNNFLSSPEGYFHTVICNAEHFISWDSNAPFA---RKF-R-----RDEPVLD-K-----I
>GT14|CAC16788.1|Chordata_Metazoa Homo sapiens;XYLT2;Xylosyltransferase 2 (EC 2.4.2.26) (Peptide O-xylosyltransferase 1) (Xylosyltransferase II) (XT-II) (XylT-II)
YMLVVHGRAIRQLKRLLKAVYHE--QHF-FYI-HVDKRSYLHR--EVVEL-AQYDNVRVTPWRMSLLTMYLRSMRDLLEVPAWDFFINLSATDYPTRTNEELVAFLKNRDKNFLKSHGRDNSR-------------KKQGLDRLFHEVDGGSWFVLTRSFVEVV----YTDDPYTLLPAESFFHTVLENSLRVTNWNRPTFFA---RKFST-----VNQEVLE-I-----L
>GT14|CAD23246.1|Arthropoda_Metazoa Drosophila melanogaster;XYLT;Xylosyltransferase oxt (EC 2.4.2.26) (Imaginal disk type I) (Peptide O-xylosyltransferase)
-----------QVHRLLKALYAP--EHV-YYI-HVDERQYLYRK--LLEL-ESFPNIRLARKRFSLLTMLLQCMEDLLQSNHWDFVINLSESDFPVKTLDKLVDFLANPGRNFVKGHGRETQK----KQG--LDKTFVECDTHMWRIVDGGSWVALSRPFVGVTHP--REDDEHTLLPAESFFHTVLRNTKHVTNWKTEQFFA---RKFPV-----INQAVL---------
>GT14|CAD62248.1|Chordata_Metazoa Homo sapiens;XYLT1;Xylosyltransferase 1 (EC 2.4.2.26) (Peptide O-xylosyltransferase 1) (Xylosyltransferase I) (XT-I) (XylT-I)
FVLVVHGRA-SQLQRMFKAIYHK--DHF-YYI-HVDKRSYLHRQ--VLQV-SRYSNVRVTPWRMSLLSTYLQSMRDLLEMTPWDFFINLSAADYPIRTNDQLVAFLRYRDMNFLKSHGRDNAR-------------RKQGLDRLFLEVDGGSWFLLNRRFVEVTF---STDD-YTLLPAESFFHTVLENSPRITNWNTPTFFA---RKFAV-----VNQEII---------
>GT14|CBY40508.1|Chordata_Metazoa Oikopleura dioica;-;Uncharacterized protein (Fragment)
YSIVVHKNA-GQVERLLRTIYRP--HNV-YCI-HIDAKADAFF-DALNDV-SSLPNVFLAKKRESRLWADLNCMNELLVHEKWKYFINLCGQDLPLKTNYQIVSHLSIKPANDIVSFPIPKSKKWKVRKVNHGEYRKRPVMTN----FFAGSYFIATRAFVN--W---AMKDKDTFSPDEMLWASISMPSARLINWKQQKLFA---NKFPD-----FDD------------
>GT14|ELU01807.1|Annelida_Metazoa Capitella teleta;-;Uncharacterized protein (Fragment)
FGIRLHRNV-AQVERLLRAVYMP--HNI-YCI-YVDLKASGVHRA-MQAI-SNFDNVFIASQLHSPVQADLQCMQDLIKSSTWKYFLNVAGSEFPLRTNLEMVRILLLNGTNDIEQYPFPA--HHRWQR-IHRIVGNAPVAT-----LKKGCYNLFSRQFVQILT--------WTSSPDEMIWATL--NSQREVIWTRWEMFA---NKFLD-----YDHVVLD--------
>GT14|NP_076572.1|Herpesvirales_Virus Bovine herpesvirus 4;GCNT3;Beta-1,3-galactosyl-O-glycosyl-glycoprotein beta-1,6-N-acetylglucosaminyltransferase (EC 2.4.1.102) (EC 2.4.1.148) (EC 2.4.1.150) (C2GnT-mucin type) (C2GnT-M)
YSMVVHEKI-ENFERLLRAVYAP--QNI-YCV-HVDVKSET-FKEAVKAI-ISFPNVFMASKLVSRVQADLNCMEDLLQSSPWKYLLNTCGTDFPIKTNAEMVLALMLKGKNSMESEVPSESKRWKYRYEVTDTLYPTSKMKD----MFTGNYFVASRAFVQVL------DNPDTYSPDEHLWATLSVPSHRLVKWQNHHLLA---NKFPR-----VDDNVL---------
>GT14|NP_194478.3|Streptophyta_Viridiplantae Arabidopsis thaliana;-;Core-2/I-branching beta-1,6-N-acetylglucosaminyltransferase family protein (Glycosyltransferase)
YLVSGSGDL-ESLWRVLRTLYHP--RNQ-YVV-HLDLESAEERLELAKRV-SQVGNVHMITKANTMVANTLHACAILLKQSEWDWFINLSASDYPLVTQDDLIDTFLDRNLNFIDHSSK----EKRAKPLIIDPGLYSTKKSDVF--LFTGSWMVLSRSFVECIW---GW-DNNFLSTPEGYFHTVICNAPHFISWDSGSAFS---RKFH-------NDPALD-K-----I
>GT14|Q5T4J0.2|Chordata_Metazoa Homo sapiens;-;GCNT6_HUMAN RecName: Full=Beta-1,3-galactosyl-O-glycosyl-glycoprotein beta-1,6-N-acetylglucosaminyltransferase 6
YVMTISQDF-DTFEWLFWAIYMP--QNV-YCI-HVDKAAI-DFKIAVSEL-LEFSNAFISSQSESRLQADLACMRDLIASTQWRYVTNTGDHDFPLKTNREIVQYLTMNWTNI-------TPNTERIKYTHREYRTRAHAF------IHFGSYVALTREFVHALY------NKDTYSPDKHFWITL---------------------------------------------
>GT14|WP_003407060.1|Firmicutes_Bacteria Clostridium butyricum E4 str. BoNT E BL5262;-;Glycosyltransferase family 14
YLIMAHNNF-DLLKILIKLLDDD--RND-IYV-HIDKKSDFNE-EYIKRD-IKHSKILFID-RMSQIECEMKLLKE--SSIQYDYYHFLSGIDLPLKNQDYIHEFFRNNGKEFIHFCSEEFNKIHRYS-IYHLFQGRNKNILYYFEKYVGGSWCSLTHKCVKIV--------EYTLCCDEFFIQTLVKNSKRYIDW-SEFLFA---RKFLD-----SKEQIVE-K-----I
>GT14|WP_019176761.1|Euryarchaeota_Archaea Methanomassiliicoccus luminyensis;-;hypothetical protein
YCVSAHKNP-QQVRMLVDHLCEE--D-L-VYM-NVFNHRAGERAAWGKWF-SDPPDRLFIRYRYSQVQAALDAMNYF--KDKYTHFVNLSGQCYPIKPMDEVRDFFRSPETSFMEAQEEGYNPYWWIRYPDIYFRLTGRSNFGFRNKPYKGSWFMLSKDAVDVLE---AI-AGRSGLPDESFFHTILMNSAHYIDWDSPKLFA---RKFIV-----AEPGI----------
>GT14|XP_005708324.1|Rhodophyta_Protista Galdieria sulphuraria;-;N-acetylglucosaminyltransferase
YFIQVSTNV-ATLSRLMRVLYHK--DNL-YAI-HFDKKIDQLVIARVITR-VSGSNIIVIP-RKSMVLNTIAGME-ALAESHWDFFINLSGSDYPLLSQSQIRRILHAKQK-----HPRPNFMKWRNRLSLHFDVPHNPGGFELLE-FSKCEWMILSNELVEIIR---SVISKHSLASDEHFFCTLLKAQQRFILWLSGAFFA---RKF-D-----SNADVLE-A-----I
>GT14|XP_006679677.1|Chytridiomycota_Fungi Batrachochytrium dendrobatidis;-;Uncharacterized protein
YLLMVHNGF-PHLCKLIETLDDG--DAI-ILI-HVDLRSIEQFINQRHQM-IGPANIFLTKYRFSLVFTQLSGFWELLDMADWDYVINLSNYDFPLKRNADIHRILNNRGKNFIEY-------TGHLAERFYRAHIGTADFASLFHPAYKHHWMIVTPDFIRL-----RYDSNHTYIPDESYFATVLVNSERYLRFAPSFFFI---RK-----------------------
>GT14|XP_012837771.1|Streptophyta_Viridiplantae Erythranthe guttata;-;Uncharacterized protein
FLFLTNTDF-APLWQLFFRGNDP--LYN-IYI-HADPFSVSPP--------GGFSGRFVAAK--TLISAARRLLANALLDDLNAYFAVISQHCIPLHSFQYVYNSLSSLYRSFIEILDDEPQLDRYIARGKQVML--PEVPFTRFRV---GSFFVLTRQHALVI---------LSCYPEEHYFPTLLSMEDTRVNWTSNFMFA---RKFPD-----CLQPLLD-M------
>GT15|AAA16119.1|Ascomycota_Fungi Saccharomyces cerevisiae;KTR2;Probable mannosyltransferase KTR2 (EC 2.4.1.-)
LLMLVRNWELSGALRSMRSLEDRFNKNYQYDWTFLNDVPFDQEFIEATTAMAGTQYALIPAEDWMCRFNSGFFFRQKILD-PYDFYFRVEPDVEYFCDFPYDPFKVMRQNKKYGFVITMYE--YEDTIPSLWEAVEEYLEESADIDMCHWTNFEIGDLNFFRSEKYIREYLDSYERWGDAPVHSIAASLL-LKKDEIFDELGYK--HMP---------------------F
>GT15|AAA34784.1|Ascomycota_Fungi Saccharomyces cerevisiae;KRE2;Glycolipid 2-alpha-mannosyltransferase (EC 2.4.1.-) (Alpha-1,2-mannosyltransferase)
-VTLVRNKELKGLLSSIKYVENKINKKFPYPWVFLNDEPFTEEFKEAVTKAVSVKFGILPKEHWMCRYQSGFFWRHELLE-EYDWYWRVEPDIKLYCDINYDVFKWMQEEKVYGFTVSIHE--YEVTIPTLWQTSMDFIKKNPEYLDCHWSNFEIANLNLWRSPAYREDTLDHYERWGDAPVHSIAAALF-LPKDKIFSDIGYH--HPP---------------------Y
>GT15|AAB68312.1|Ascomycota_Fungi Saccharomyces cerevisiae;KTR6;Mannosyltransferase KTR6 (EC 2.4.1.-) (Mannosylphosphate transferase MNN6)
FVSLITERDMTQILQSIDEVQVKFNKNFAYPWVFISQGELDGMKQEMIRQAIDIKFAEIPADEWQARYFAGFFWRHPVLD-EFDWYWRVDPGIKLYCDIDHDLFRWMQDGKVFGFTLSMSE--AKEANEKIWDVTKKFAKDFPKFISCETSNFEIGNLNFYRSPAYRKNYIDEYWKWSDSIIHTIGLSML-LPKDKIFENIGFH--YDK---------------------Y
>GT15|AAT92917.1|Ascomycota_Fungi Saccharomyces cerevisiae;KTR4;Probable mannosyltransferase KTR4 (EC 2.4.1.-)
ILSLVRNSDLEDIISSIQQLEEEYNKNFGYPYTFLNDEEFTDEFKDGIKSILKVEFGTIGPDNWMCRFYSKEFYHHPLLS-KYKYVWRLEPNVNFYCKINYDVFQFMNKDKIYGFVLNLYD--SPQTIETLWTSTMDFVEEHPNYLNCHWTNFEIVDLDFLRSEPYEKQYLEEYERWGDAPVRSLALALF-ADKSSIFRDIGYH--HTP---------------------Y
>GT15|AAV19790.1|Ascomycota_Fungi Saccharomyces cerevisiae;-;Sequence 50 from patent US 6753314
MVTLARNSDLWNLVKSIRHVEDRFNNRYHYDWVFLNDQPFSDEFKRVTSALVGAKYGTIPKDHWMCRFQSGFIWRHPLLE-EYEWFWRVDTDITLFCDIQYDIFKFLKVNKKYGFILSVSE--YERTIPTLWETTKKFIKKNPKFLHCHWTNFEIGSLDFFRSDAYREDYLDSYERWGDAPVHSIAASLF-LDKSEIFDGLGFH--HPD---------------------F
>GT15|ABD85704.1|Proteobacteria_Bacteria Rhodopseudomonas palustris;-;Mannosyltransferase-like
------------LRGSLTRLFEAFNARAGYPVLILHEGDFAAHEQDDLRRTLGLQFIELEPDDFMTRW-----WLRDLLS-EYDVYMRLDDDAYLDEAIG-DPIASVLEGVDYASNCVHIE--HPMNALGLADLCRRLIGESAEHGP----NFHVARRCVWESKPLRDSGIDELLRWGDAPIQTIGV--------------------------------------------
>GT15|CAA41111.1|Ascomycota_Fungi Saccharomyces cerevisiae;YUR1;Probable mannosyltransferase YUR1 (EC 2.4.1.-)
ILMLVRNSELEGALDSMRSLEDRFNNKYHYDWTFLNDVPFDQDFIEATTSMAGTQYALIPPEDWMCRFNSGFFFRQSILD-NYDYYFRVEPNVKYYCDFPYDPFRVMRLGKKYGFVISLYE--YEETIPTLWDAVEEYLVASEETIKCHWSNFEIGDLNFFRSDEYKHETLDAYERWGDAPVHSIGVSLL-LRPDEIFDELGYF--HSP---------------------F
>GT15|CAA44713.1|Ascomycota_Fungi Saccharomyces cerevisiae;KTR1;Alpha-1,2 mannosyltransferase KTR1 (EC 2.4.1.-)
FVTLVRNRDLYSLAESIKSVEDRFNSKFNYDWVFLNDEEFTDEFKNVTSALVGTKYGVIPKEHWMCRFESGFFYRHPLMD-DYDWYWRVEPDIKLHCDIDYDVFKFMKDKKKYAFAISIKE--YEATIPTLWETTRKFMEAHPELIHCHWSNFEIAALDLWRSPAYSADYLDRYERWGDAPVHSIGAALF-LDRSEIFGDIGYY--HVP---------------------F
>GT15|CAA86709.1|Ascomycota_Fungi Saccharomyces cerevisiae;KTR7;Probable mannosyltransferase KTR7 (EC 2.4.1.-)
FVMLTRNEEIEDVLKTMRSIEGHFNKWFKYPYVFLNDDPFTDHFKDQIQAATAVEFGTVDEIMWMCRFYSGIFYKHPLVS-KYEWYWRIEPDVDFFCDISYDPFFEMAKNKKYGFTVLITE--LYWTVPTLWKLMVDFLLENHGQVNCHWSNFEIARVDLFDNEIYNAKFLEETERWGDAPIHSIGLGMT-LDLEDVFRDIGYR--H------------------------
>GT15|CAA95891.1|Ascomycota_Fungi Saccharomyces cerevisiae;KTR5;Probable mannosyltransferase KTR5 (EC 2.4.1.-)
FVMLTRNGELEDVIKTINSIEEHFNQWFHYPYVFLNDQPFEEDFKAKVRDVTGVEFGTIDEISWMCRFYSGLFYKHPLVQ-KYEWYWRLEPDVEFFCDITYDPFLEMLRNKKYGFTIIIPE--LYWTLGSLWKLFTKFESDDPELLKCHWSNFEIARLSVFDNDIYNSQYLEKKERWGDAPVHSIGLSLT-LDLDDVFRDIGYR--H------------------------
>GT15|ELU17833.1|Annelida_Metazoa Capitella teleta;-;Uncharacterized protein (Fragment)
------------LMRALDSIYQNFNHRFNYPIIIFHEKEFTAK-IPQIQTETNIYFQEI---AFMCRFHSKMLYHHPIIR-GFEFLFRLDDDSVLLSQIHYDIFVFMRKNITYGYKTTSFD--QPRCTTGLWEITGHFINVTGVKPT--YNNFEVSRSALWLSREYSANYLDHYHRWGDAPIKSLAVSMF-VHENQTFTDIKYK--H------------------------
>GT15|XP_005840279.1|Cryptophyta_Protista Guillardia theta;-;Uncharacterized protein
-------EDIQDLNQSLNLLEKNFTLHRYYPYVF---YDFLEESTILQLNRPLISFHKI---NMMCRFFSGPIYNHPAMQASLDFYMRLDVDSFFIAPLPLDPIQHLADQQSYGYITTGRE--ERKFVVNLWET---FMQEATRLKLTFYTNFEVSAMAVWRSQEYLAKALDDRHRWGDGPVHYLAVRAM-LEDSKVFNTLPYW--H------------------------
>GT15|XP_005846667.1|Chlorophyta_Viridiplantae Chlorella variabilis;-;Uncharacterized protein (Fragment)
ILILARNSDLHGVLSSVGQLERRFNAAPHYPYCYLNDRPFSLKFRAAVTAATACFFGLVPQEHWMCRYFSGFFFDHPLLE-GFDWYWRVEPDVHFMCNLPRDPFRHMQANQSLAWTIVMDE--VPSTIPSLWPEVQQWLADNPQHATCHWSNFEVGRLSFFRSKAYRSAHLDAYERWGDAPVHTLAAAAL-LHRDQIARDIGYK--H------------------------
>GT15|XP_008044154.1|Basidiomycota_Fungi Trametes versicolor FP-101664 SS1;-;glycosyltransferase family 15 protein
ILMLARNSDVNDAVRSVRRLEDRFNKKFGYPWVFLNEEPFSDEFKTRISNVIGVSFGQIPHDHWMCRFNSGFFYRHPLLQ-QYKWYWRVEPDVHFHCDIDFDPFLYMEDNKTYAFTITMYE--FRATIPTLWDTVKDFTKKHPEYIACHWSNFEIASMDFWRDEAYTKEHLDRYERWGDAPVHSIAVSLF-ANKDQIFDEIGYE--HNP---------------------Y
>GT15|YP_008052329.1|Phycodnaviridae_Virus Phaeocystis globosa virus;-;Glycosyltransferase
--------------------------------VIIFHEDFTDEVKQDFLDIY-ITFCKIDFQNNMCRFFSGVMQKMDIFR-GYDSYIRMDDDIEPF--IGQDKFL-LEAKNYYAYRSTFKD--NPELMPTLYKFTYDFCKTYKELVPCP-NNFHFTKLDLWRNSIIKDDTITNLYNWMDANIHAMIVYVL-CPLLYIITDFGYR--H------------------------
>GT16|AAF71273.1|Nematoda_Metazoa Caenorhabditis elegans;-;UDP-GlcNAc:a-6-D-mannoside b1,2-N-acetylglucosaminyltransferase II (EC 2.4.1.143)
LVIQVHDRP-VYLQYLIESMRNTKGIEDTL-LVFSHDINVGIINEMIRNITFAVYQIFYPYNLQTQIKHHWWWKMNFVFDGKDPWVLLLEEDHMLAPDA-LHVLDIIVSNCEISLGFYLK---SNKYGQDIAHLGVHPWYS------SKHNMGMALQKNTSQKIK---GCSEMWDDYNWDWSLMQISAKCLPQRFRVTKSPRVI--HIGCGH--THRCEAH-KALQSTQET
>GT16|AAH06390.1|Chordata_Metazoa Homo sapiens;MGAT2;Alpha-1,6-mannosyl-glycoprotein 2-beta-N-acetylglucosaminyltransferase (EC 2.4.1.143) (Beta-1,2-N-acetylglucosaminyltransferase II) (GlcNAc-T II) (GNT-II) (Mannoside acetylglucosaminyltransferase 2) (N-glycosyl-oligosaccharide-glycoprotein N-acetylglucosaminyltransferase II)
LVVQVHNRP-EYLRLLLDSLRKAQGIDNVL-VIFSHDFWSTEINQLIAGVNFCVLQVFFPFSIQSQTKHHWWWKLHFVWERYAGLILFLEEDHYLAPDF-YHVFKKMWKECDLSLGTYSA---SRSFYGMADKVDVKTWKS------TEHNMGLALTRNAYQKLI---ECTDTYDDYNWDWTLQYLTVSCLPKFWKVPQIPRIF--HAGCGHH-KKTCRPS-TQSAQIESS
>GT16|AAX53005.1|Arthropoda_Metazoa Drosophila melanogaster;-;Mannosyl (Alpha-1,6-)-glycoprotein beta-1,2-N-acetylglucosaminyltransferase, isoform B (EC 2.4.1.-) (EC 2.4.1.143)
IVVQVHTRI-TYLRHLIVSLAQARDISKVL-LVFSHDYYDDDINDLVQQIDFCVMQIFYPYSIQTQTKHHWIWKANRVFNEHTGLVLFLEEDHYVAEDF-LYLLAMMQQQCNLSLGTYLK---TFNYYTYHSKVEVMPWVS------SKHNMGFAFNRTTWSNIR---KCARHYDDYNWDWSLQHVSQQCLRRKLHAVKGPRVF--HIGCGHHKNKNCESN-QVISKVQHT
>GT16|CAC08806.1|Streptophyta_Viridiplantae Arabidopsis thaliana;MGAT2;Alpha-1,6-mannosyl-glycoprotein 2-beta-N-acetylglucosaminyltransferase (EC 2.4.1.143) (Beta-1,2-N-acetylglucosaminyltransferase II) (GlcNAc-T II) (GNT-II) (Mannoside acetylglucosaminyltransferase 2) (N-glycosyl-oligosaccharide-glycoprotein N-acetylglucosaminyltransferase II)
IVLYVHNRA-QYFRVTVESLSKVKGISETL-LIVSHDGYFEEMNRIVESIKFCVKQIFSPYSPHVSLKHHWWWMMNTVWDGHEGHILFIEEDHFLFPNA-YRNIQTLTRDCFANLAPSDK---SRGEGLESLVAERMG------------NVGYSFNRSVWENIH---QKAREFDDYNWDITMWATVFPSFGSPVYT-RGPRAV--HFGCGHQDEGDCIDNGVVNIEVKE-
>GT16|EFA75769.1|Amoebozoa_Protista Polysphondylium pallidum;-;Uncharacterized protein
IVIRVFNKP-QYFKVVLDFYRQVEGIEETM-IIVSHDGIFKEMFDLVESIDFCVRQIIHPYSSQTPLKHHFWWHLNYVWDVHKGDICLLEEDHLPSYDF-YRTLLATRDDCFLQM----Q---EPSFNGDTHDLGICPNIG---------NMGLTFDRRRWEILR---GAGDEFDDYNWDWTLQHMSVNKIPG--KYTCKPRII--HIGCGHRDNNNCEVTKEQIDQYDE-
>GT16|XP_005989562.1|Chordata_Metazoa Latimeria chalumnae;-;PREDICTED: alpha-1,6-mannosyl-glycoprotein 2-beta-N-acetylglucosaminyltransferase
VVVQVHNRP-EYLRLLVESLKNARGIENVL-LIFSHDFWSPEINQIVASVNFCVLQIFFPFSLQSQTKHHWWWKLHFVWERHKGLVLFIEEDHYMSPDF-YHVLKKMWGDCDLSLGTYTR---VTGFSSKADKVEVKTWKS------TEHNMGMAMNRETYQRLI---QCTDTYDDYNWDWTLQYLTVACLPEFWKVSEVPRIY--HAGCGHH-KKICNPSSE-KAKIDAS
>GT16|XP_007215589.1|Streptophyta_Viridiplantae Prunus persica;-;Uncharacterized protein
IVLYVHNRP-QYLKAAVDSLSRVVGINETL-LIVSHDGYFEEMNKIVEGIRFCVKQIFAPFSPHVSLKHHWWWMMNTVWDGHSGHILFIEEDHYIYPNA-YRNLQILTEHCYANLAPCDVN--ARGEGWDSLIAERMG------------NVGYTFNRTVWRKIH---RKTTEFDDYNWDITMWATVYPSFGNPVFT-RGPRAV--HFGCGHQGQGACIDNGMVNFQVEE-
>GT16|XP_008200361.1|Arthropoda_Metazoa Tribolium castaneum;-;Uncharacterized protein
IVIQIHDRI-TYLRHLIVSLAQARGISQAL-LVFSHDYYDEEINSLVQSVDFCVIQIFYPYSIQTQTKHHWWWKANRVFNQHTGLVVFLEEDHYVAEDF-IYILKLMERHCNLSLGTYLK---TFNYYGDSQKVEITPWIS------SKHNMGMAFNRSTWMDIV---GCADYYDDYNWDWSLQHISQNCLKHKFHAVRGPRVF--HIGCGHHKKNNCEST-AVISKVQQT
>GT17|AAD20428.1|Streptophyta_Viridiplantae Arabidopsis thaliana;-;Beta-1,4-N-acetylglucosaminyltransferase family protein (Glycosyltransferase) (Putative N-acetylglucosaminyltransferase)
DAIIFSNEL-DLLEVRWRELEPYV-----SKFVILESNTTFTGIPKPLFFSNKERFAFAEGKIVLLEGQQRVAMNWLLREADGDAVIMSDADEIPSPHTVKFLQWIPDVMHLEMREYMYSFEFHIYSRKWTQYRHS----------RLSDAGWHCSFCRRLNEFV----F---KMKGYSHADRKRKEFLDYQRIQK-HICKGY---DLFMLELAVHLPAFLIQNAARFRFL
>GT17|AAD31053.1|Streptophyta_Viridiplantae Arabidopsis thaliana;-;F3F19.2 protein
DAVLFSNEL-DILAVRWRELFPYI-----TQFVLLESNTTFTGLPKPLVFAHRDEFKFIESRLTYEEAYQRVALDQLLAGIDDDLLLMSDVDEIPSRHTINLLRWIPKILHLRLKNYLYSFEFHRYETGKTRYAH----------YRLADAGWHCSFCRRISEFI----F---KMKAYSHNDRVRGHFLNPKRVQR-VICKGA---DLFMLEIAVHLPSYLLENADKYRFL
>GT17|AAF01546.1|Streptophyta_Viridiplantae Arabidopsis thaliana;-;Beta-1,4-N-acetylglucosaminyltransferase family protein (F4P13.16 protein) (Glycosyltransferase)
DAALFSNEI-DMLTLRWNELNPYI-----TQFVLLESNSTFTGLSKQLAFDNREKFKFVEPRLTVEESFQRLALDQKLAGIEDDLLIMSDVDEIPSGHTINLLRWFPPILHLQLRNYLYSYEYHLYKPGKTRCAHF----------RLTDSGWHCSFCRHINDFV----F---KMKAYSHTDRVRLHYLNPRRIQD-IICKGT---DLFMLEIAVHLPGYLIQNADSYKYL
>GT17|AAF16573.1|Streptophyta_Viridiplantae Arabidopsis thaliana;-;Beta-1,4-N-acetylglucosaminyltransferase family protein (Glycosyltransferase)
DAVLFSTEV-ELLTIRWKELYPYV-----TQFVLLESNSTFTGLPKPLVFGHRDEFKFIEPRLTYEEAYQRIALDQLLAGIDDDLLIMSDVDEIPSRHTINLLRWIPQILHLRLKNYLYSFEFHRYQTGKTRYAH----------YRLADSGWHCSFCRRISEFV----F---KMKAYSHYDRVRAHYLNPKRVQR-VICSGS---DLFMIDIAVHLPAYLLENAERYKFL
>GT17|AAI54149.1|Chordata_Metazoa Danio rerio;-;Mannosyl (Beta-1,4-)-glycoprotein beta-1,4-N-acetylglucosaminyltransferase
----INHEF-DLLHTRFHELADVV-----DTFLVCESNFTAYGDARPLHLLNGT-FDYIKHKILIADDYLRTYLMARIQGLPDDVFILNDADEIPSRDGILFLKTEPVGIHLRKSLYYGTLNVFKVYKGDGIYLRRRSYYTMSGFREVHYAGWHCSWC-KPEGIY----Y---KLVSAQNGDFPRGEKRKLSYIKD-LIRTG----GWFGSDPKEHMPKYLLDNYDKYHYL
>GT17|AAL28965.1|Arthropoda_Metazoa Drosophila melanogaster;-;LD34806p
--------L-ELLELQIRALIEVV-----DYFLI----YYVSNGSK-----ERSLESMLGSQTSAYSHF-RRQLWQQCVQMAQDLLLHGDSGTVYAPAALKFLKYYPLKFRLKYNVYGFY---KTLLNGVISSLGHLHSLDAHRLHRLGDGGWNCELCP-PEQIV----L---LLQSSSPRKLTRNAHIDANYMQQ-LIANGV---HI-GTSEKYFAPEEALQHSSQYGQL
>GT17|AEE77161.1|Streptophyta_Viridiplantae Arabidopsis thaliana;-;Beta-1,4-N-acetylglucosaminyltransferase family protein
-----------------------------------------------------------------------------------DLLIMSDVDEIPSRHTVNLLRWITQIPHLRLKNSLYSFEFHRFQMGKTRYAH------------------------------------------------------------------------------------------------
>GT17|BAA02937.1|Chordata_Metazoa Homo sapiens;MGAT3;Beta-1,4-mannosyl-glycoprotein 4-beta-N-acetylglucosaminyltransferase (EC 2.4.1.144) (N-glycosyl-oligosaccharide-glycoprotein N-acetylglucosaminyltransferase III) (GNT-III) (GlcNAc-T III) (N-acetylglucosaminyltransferase III)
-----NHEF-DLLDVRFHELGDVV-----DAFVVCESNFTAYGEPRPLKFEMLTNFEYIRHKVLIADDYLRTFLTQRLRNLPDDVFIIDDADEIPARDFLKLYDGWTEPFAFHMRTSLYGFDMIRLRRRQYYTMPNFRQYENRTGHILHFAGWHCSWC-TPEGIY----F---KLVSAQNGDFPREDKRDLNYIRG-LIRTG----GWFGTDPSEHMPKYLLKNYDRFHYL
>GT17|BAB01284.1|Streptophyta_Viridiplantae Arabidopsis thaliana;-;Beta-1,4-N-acetylglucosaminyltransferase family protein (Glycosyltransferase)
DAVLFSNEK-DLLTVRWNELYPYV-----TQFVILESNSTFTGLPKPLVFSNKDQFKFVEPRLTVEEAYQRVALDQLLAGIEDDLLIMSDVDEIPSAHTINLLRWIPPVLHLQLKNYLYSFEYHRYSPGKTRYAHF----------RLADSGWHCSFCRYISEFI----F---KMKAYSHSDRVRSHYLNPRRIQD-VICKGT---DLFMLEIAVHLPSYLLYNAEQYKYL
>GT17|CAB87787.1|Streptophyta_Viridiplantae Arabidopsis thaliana;-;At5g14480 (Beta-1,4-N-acetylglucosaminyltransferase family protein) (Glycosyltransferase)
DAVLFSNEV-DMLTIRWKELYPYI-----TQFVILESNSTFTGLPKPLVFGNRAKFEFAEPRLSVEEAYQRIALDQLLAGIEDDLLIMSDVDEIPSAHTINLLRWYPPILHLQLKNYLYSFEYHQYKPGKTRYAHF----------RLADSGWHCSFCRHISEFI----F---KMKAYSHNDRVRSHYLNPKRIQD-VICKGT---DLFMLEIAVHLPAHLIEKAESYKYL
>GT17|CDO68468.1|Basidiomycota_Fungi Pycnoporus cinnabarinus;-;Glycosyltransferase Family 17 protein
DAVLFSSEL-DLFEIRLNELAPVV-----SKFFVVEADRTFTGRPKNLTFAHADRFAAFADKIVVNEAAQRGHMNDLLADPQPPLVIFSDVDEIPSAHTIRLLQDAPSPIHLQMREYLYSFEWHRLGADGSGYNHQVAEWK------LADSGWHCSFCRYLHEFA----D---KMSGYSHADRVTDSLLRPERIQQ-VICEGK---DIFMLDLAVHVPRHLIEHSERFRFL
>GT17|CEO97803.1|Rhizaria_Protista Plasmodiophora brassicae;-;Uncharacterized protein
DVVVFNMET-PMLEIRLNELDVVV-----DRFVVIEAKCTFNRQPKATLLDHSDEFRPFRAKIHPVEDAMRSHAIRETRKADGDLFIFSDLDELPRLDSIKLLRDFGSRIHLQMDNYRYSFGFRSTVSVIGRFPD--KDLV-ARFRYLGDAGWHCSSCPTVDMVR----Q---KMLGYSHSDRHSQHLLDEDEIRR-KICMGE---DMFFLSMNNHVPDHVARNPTRFRFL
>GT17|KDR75747.1|Basidiomycota_Fungi Galerina marginata;-;Uncharacterized protein
DAVLMSNEL-DLLEIRLNELDSVV-----DYFLIVESNATFTGLPKETFFNNKKRFAKFEHKIVDVEAHTRNTMTMLIRSSTKSLVLMSDVDEIPARHTINLLKDFGASIHLQLRDYLYSFEWAQIWNQDSYYRHS----------KLADAGWHCSYCRTIPEYA----L---KMKGFSHADRGRVNLLDPKRIQD-TICRGK---DIFMLDLAVGLPRYLIENSEKFRFL
>GT17|WP_029231926.1|Firmicutes_Bacteria Butyrivibrio sp. VCB2006;-;glycosyl transferase GT17 family protein
DCVPFFNEV-DILKLRLNILNPYV-----DKFIIEEATTTFSGEPKELCFKNKDLFKEYLDKITERDYYQKNHLIKGLEGADSDVIIFGDVDEIPNPKVLEKIIDKTKVYHLAQRNFYAFLNMVTSLSNPEEGIVRLRDLVPVTDKRVADGGWHFGYMGRVERIG----V---KVKAAAHQEYNDREIL--AETMD-RLILGQ---DIFRNEIDDTYPQYLREHVDDYSYL
>GT17|XP_005646672.1|Chlorophyta_Viridiplantae Coccomyxa subellipsoidea;-;Uncharacterized protein
---MFNDEL-DMLEIRLTTLYKVV-----DYFVLVESRVSHQDRPKALNYDNKRRFVKFADKIVYKEWYHREMLFKGLSEAEGDLIISGDLDEIPRPAAVQALRGAHDCAVLEGSFFYYSFSWITTMGG--MNKNDMRYNSNCTLQ-MKRASWHCTDCSSIRAVK----N---KISAFCHAEKDQFPYNETEWILD-RVVRGL---ALFPDPYCTNAPPAVLANPGKYHYM
>GT17|XP_006369937.1|Streptophyta_Viridiplantae Populus trichocarpa;-;Uncharacterized protein
DAVLFSNEV-DILTIRWKELYPYI-----TQFVILEANSTFTGIPKPLLFRNRDRFKFIENRLTVEEAYQRVALDQLIAGIDDDLLLMSDVDEIPSAHTINLLRWTPPVLHLQLKNYLYSFEYHKFKTGKTRYAH----------YRLSDAGWHCSFCRHISEFV----F---KMKAYSHYDRVRSHYLNPKRIQN-VICKGA---DLFMLEIAVHLPEFLLNNAEKYKYL
>GT17|XP_006666195.1|Ascomycota_Fungi Cordyceps militaris;-;Glycosyl transferase family 17 protein
DLIMVNTEL-DFLEIRLHALYDYV-----DYFIIVESPKTFQGDTKPLVIENWDRFRRYHDKMIDYEDLQRDAMFEGLTGPKGDVIVVADVDEIPRPESLVVLRNFPRRLTLASKFYYYSFQFATFYQGWTIKPTNLRNGDGGWFRDLNNAGWHCSSCATIEQFL----N---KIASFSHGWMNDEEYRDKAKIAD-AIRNGK---DVWRDDNNKDMPPLILQEPARFGYM
>GT17|XP_013392821.1|Lophotrochozoa_Metazoa Lingula anatina;-;PREDICTED: beta-1,4-mannosyl-glycoprotein 4-beta-N-acetylglucosaminyltransferase-like
---LLNHEF-DTLEALLHELTGLV-----DVVMIEESNFTLHGDPKPLLYKLQDGYLCFYSNIIKMERYARNFLKKGIAELPDDLFLHLDADEIPSRDAIAFLKPEPFGFVLRWSVYGYFWKMGMLRQVFDNQPGTLRSKVSEYKKGVWQAGWHCSWC-DINGIK----T---KLTSALSGDGERPKKQKLDFLRT-LVREGR----WFGPPATDKFPNFILSNKERFKHL
>GT17|YP_001497814.1|Phycodnaviridae_Virus Paramecium bursaria Chlorella virus NY2A;-;Uncharacterized protein B618R
DCFIFYNEL-DLLNYRLHTLNDIV-----DYFIIVESTHTFSGKEKELFFDNKHLFEKFKDKIIKNEYYQRNSISIGLDNINNDIIIISDVDEIPDINRLYEIKHYNSVCALEMDLYYYNLNSIITYKELKLTCNEIR--------EIRNGGWHLSY-GDTMFIK----N---KIHSFSHQELNLDIFTDIEKIEQ-RVKNCS---DVYRHPINNYLPHEYEKYLKKFYKM
>GT21|AAC48147.3|Nematoda_Metazoa Caenorhabditis elegans;CGT2;Ceramide glucosyltransferase 2 (EC 2.4.1.80)
IIKPIIGAD-ANLYTNLETFFTTQYHK--FELLFCFDRSDDPAVKVVESLVKKYPSVDSTMFFGGLNPKINNMMPAYRIA-KYQLIMISDSGIFMKSDAVLDMASTMMHETMALVTQTPYCKDRKGFASVFEQIYFGTSHARIYLAGCPTGMSSMMKKEALDECG---GFAAFSGYLAEDYFFGKKLASRGYKSGI-STHPALQ--NSAAVTMTSFTDRVCRWVKL----R
>GT21|AAF46795.1|Arthropoda_Metazoa Drosophila melanogaster;-;Glucosylceramide synthase (EC 2.4.1.80) (LD24788p)
ILKPLMGVD-PNLQHNLETFFTMDYPL--YELLFCVEDKEDPAIQLVERLLAKYPLVDAALFVGGVNPKINNIHPGYMAA-KYDFVMISDSGIKMKDDTLLDMVQN-MSEKHALVHQMPFTCDRDGFAATFEKVFFGTVQSRIYLSACHTGMSCLLRKAVIDQLG---GLRAFGCYLAEDFFIARSVTRLGWKMRI-SNQPALQ--NSGLCDIGSFQARLIRWAKL----R
>GT21|AAH38711.1|Chordata_Metazoa Homo sapiens;CEGT;Ceramide glucosyltransferase (EC 2.4.1.80) (GLCT-1) (Glucosylceramide synthase) (GCS) (UDP-glucose ceramide glucosyltransferase) (UDP-glucose:N-acylsphingosine D-glucosyltransferase)
LLKPLKGVD-PNLINNLETFFELDYPK--YEVLLCVQDHDDPAIDVCKKLLGKYPNVDARLFIGGINPKINNLMPGYEVA-KYDLIWICDSGIRVIPDTLTDMVNQ-MTEKVGLVHGLPYVADRQGFAATLEQVYFGTSHPRYYISACVTGMSCLMRKDVLDQAG---GLIAFAQYIAEDYFMAKAIADRGWRFAM-STQVAMQ--NSGSYSISQFQSRMIRWTKL----R
>GT21|AAK31533.1|Nematoda_Metazoa Caenorhabditis elegans;CGT3;Ceramide glucosyltransferase 3 (EC 2.4.1.80)
IIKPIVGKD-NNLYENIESFFTTQYHK--YELLFCFNSSDDEAVEVVKCLMKKYPKVDAKLFFGGLNPKINNMMPAYRSA-LYPLILVSDSGIFMRSDGVLDMATTMMHEKMALVTQV-----------------------------CSTGMSSMMKKEALDECG---GISNFGGYLAEDYFFGRELANRGYKSAI-SSHPALQ--NSSSVSVSSFLDRICRWVKL----R
>GT21|CAB03296.2|Nematoda_Metazoa Caenorhabditis elegans;CGT1;Ceramide glucosyltransferase 1 (EC 2.4.1.80)
VIKPIVGTD-KNLYQNLESFFTSQYHS--FELLFCFHSEEDEAIEVVRSLIKKHPNIEAKILFEGMNPKVNNMMPAYRAA-RYPLVLISDSAIFMRPDGILDMATTMMHEKMASVTQV-----------------------------CSSGMSSMMKKSALDECG---GMEKFGEYLAEDYFFAKALTSRGCKAAI-STHPALQ--NSASVTVLSFFNRIGRWIKL----R
>GT21|EMD41930.1|Basidiomycota_Fungi Ceriporiopsis subvermispora;-;Glycosyltransferase family 21 protein
ILRPLKGLD-TNLYENLESTFTQEYSN--FEIFLCVADEHDQALGVVRDLISKYPNVDAHVIIGGVNPKVNNLMCAYKQA-KHDILWVLDSNVMVVPGTLARSVDALSSRRIGLVHHVPFAWATEYALGSRLEEAFLNTNHAKMYLACVVGKSNLYRRSDLERVDGSLGLAAFGRFLAEDNMIAGALWHLGLRHDL-SCDVARN--AVGSMTLSAYVWRRVRWVRV----R
>GT21|KOM57839.1|Streptophyta_Viridiplantae Phaseolus angularis;-;Uncharacterized protein
VIMPLKGFG-EHNLHNWRSQITSLYGP--IEFLFVVESIEDPAYHAVSRLIAEFDHVDAKVVVATCSQKIHNQLVGVEHK-DSKYVLFLDDDVRLHPGSIGALTREMENPEIFIQTGY-----------------------------PSLGSYCMMHADDFDRYG---VVSGLKDGYSDDMTLA-AISGAHKRLIT-SPPVAVH--PLASDNFGRYWN-------------
>GT21|WP_012648726.1|Proteobacteria_Bacteria Geobacter daltonii;-;Glycosyltransferase HpnI
ILKPVKGMD-AESFAIFASFCTQDYPC--FQMVFAVASASDPVVPVIKRLMSEFPAVDMELVVDGPNYKVCNLINAFPKA-RHDLIIVCDSDIRVGKNYLKEVCSSFSDPQVGLVTSLYRTTGVMGAASAIEAMGFTSEMVPNVMVAFALGASMAVRREALEKIG---GFRALVDYLADDYQLGNKIHRAGYRLVL-SDYYVES--ILHRESMKNILSRQLRWART-----
>GT21|WP_013335207.1|Crenarchaeota_Archaea Vulcanisaeta distributa;-;Glycosyl transferase family 2
VIMPVRGLD-QNIKGNIASVLDQDYPR--RNYIFVLDSDDDPAYGIIKDLIKGF-NVDASVLINGGRSKGEALAFALSHV-DGEIVVFVDSDALVHRHWLRNLVSSLVKGSGAATTAR-----------------------------FTWGGSTAIWKWILDKWR---IRDYLPYYLSDDYVITHFVHREGLAIDF-VPESLVL--TLEDVSIKEAFTRQLWYVRV----Y
>GT21|XP_002383717.1|Ascomycota_Fungi Aspergillus flavus;-;Ceramide glucosyltransferase, putative
-IRPVKGLE-PNLYDCLASTFRQDYPK--LTVYFCVASRSDPGYPTLQKLVSDFPHAGARIFIEGPNPKIRNMSRAYREA-KGDIVWIIDCNVWVGKGVCGRMVDRLSGKKYKFVHHLPLVVDVTSGASSTEEQNALVESYTNGDADCIVGKSNMFRRSHLDYLTTPSGIDYFSDNICEDHLIGDLLWKNGKHGMV-FGDLAIQ--PVGNMSVGDYIARRVRWLRV----R
>GT21|XP_002402583.1|Arthropoda_Metazoa Ixodes scapularis;-;Ceramide glucosyltransferase, putative (EC 2.4.1.80)
IIKPLTGVD-PNLFSNLESFFTMSYPQ--YEILFCIQDESDPSIMLVNRLMEKHPLVDARVFVGGVNPKINNMQPGYEAA-KYDLILVSDSGLRMKEDTLLDMV-LTMTDNVALVHQMPFVCDRKGFPAILEKVFFGTAHARIYLAACATGMSALMRKKLLDDVG---GIRAFAQYLAEDFFFAKSFAERGWKMKI-SSQPAWQ--NSGLCEVGLFQTRVARWAKL----R
>GT21|XP_004988632.1|Salpingoecidae_Choanoflagellida Salpingoeca rosetta;-;Uncharacterized protein
MIKPIKGNS-PTLRGNLESCFRALSPD--DEILMCVETEEDPALAIARHVAASYPNITCRFFTHGVNPKINNIYDAFHAA-AHDFVWIHDANVFIDPSTPAVMARTLSSPSVGIVHQLPIIAPAVDLANTIEEVYFATQHAHMYVFACVNGMSNMFRRSTFKAIG---DLTSVSHHIAEDFFISKALHDAGLRHVL-APPPAVQ--RQQPRAIANIAARHLRWGRL----R
>GT21|XP_007178272.1|Chordata_Metazoa Balaenoptera acutorostrata scammoni;-;ceramide glucosyltransferase isoform X2
LLKPLKGVD-PNLINNLETFFELDYPK--YEVLLCVQDHDDPAIDVCKKLLGKYPNVDARLFIGGINPKINNLMPGYEVA-KYDLIWICDSGIRVIPDTLTDMVNQ-MTEKVGLVHGLPYVADRQGFAATLEQVYFGTSHPRSYISACVTGMSCLMRKDVLDQAG---GLIAFAQYIAEDYFMAKAIWTKLRINML-PATIICE--PISECFVASLIHHVFRW--------
>GT21|XP_013904643.1|Chlorophyta_Viridiplantae Monoraphidium neglectum;-;Uncharacterized protein
----LKGGD-ATLELLFSQLAKQTHRA--WHLRVVVDSTEDPAWKLATSAVAAAEAAGASWLEDSGSLKCAALRQAYKLL-PETAVVINDGDADARPDWLIMLVSEVCQPGVGAVVCA-----------------------------AVWGGSLAVRREVVEASG---WVELMKTSLSEDTALPGSLWAAGWKFVW-VTGIV----SVDDRPPGDLW-PVARWL-------
>GT24|AAA85850.1|Arthropoda_Metazoa Drosophila melanogaster;UGGG;UDP-glucose:glycoprotein glucosyltransferase (UGT) (dUGT) (EC 2.4.1.-) (UDP--Glc:glycoprotein glucosyltransferase)
SVASGHLYE-RLLRIMMVSLLKHTKSP--VKFWFLKNYLSPQFTDFLPHM--ASEY-NFQYELVRTIWGYKILFLDVLFPLNVRKIIFVDADAIVRTD-IKELYDMDLGGAPYAYTPFCDSR-KEMEGFRFWKQGYWRSHLMGRR--YHISALYVVDLKRFRKIAAGDALSQDSLSNLDQDLPNNMIHQVAIKSL--PDD--WLVIDLCNP--QTKEAK-----------L
>GT24|AAF26036.1|Streptophyta_Viridiplantae Arabidopsis thaliana;-;Putative UDP-glucose:glycoprotein glucosyltransferase; 101200-91134
SIASGHLYE-RFLKIMILSVLKNTNRP--VKFWFIKNYLSPQFKDVIPHM--AQEY-NFEYELIRIIWAYKILFLDVIFPLSLEKVIFVDADQIIRTD-MGELYDMDIKGRPLAYTPFCDNN-REMDGYKFWKQGFWKEHLRGRP--YHISALYVVDLVKFRETAAGDTLSKDSLSNLDQDLPNYAQHTVPIFSL--PQE--WLTIDLCNP--MTKEPK-----------L
>GT24|AAF66233.2|Chordata_Metazoa Homo sapiens;UGGG2;UDP-glucose:glycoprotein glucosyltransferase 2 (UGT2) (hUGT2) (EC 2.4.1.-) (UDP--Glc:glycoprotein glucosyltransferase 2) (UDP-glucose ceramide glucosyltransferase-like 1)
SVASGHLYE-RFLRIMMLSVLRNTKTP--VKFWLLKNYLSPTFKEVIPHM--AKEY-GFRYELVRIIWGYKILFLDVLFPLAVDKIIFVDADQIVRHD-LKELRDFDLDGAPYGYTPFCDSR-REMDGYRFWKTGYWASHLLRRK--YHISALYVVDLKKFRRIGAGDALSQDSLSNLDQDLPNNMIYQVAIKSL--PQD--WLTIDLCNP--KTKESK-----------L
>GT24|AAH41098.1|Chordata_Metazoa Homo sapiens;UGGG1;UDP-glucose:glycoprotein glucosyltransferase 1 (UGT1) (hUGT1) (EC 2.4.1.-) (UDP--Glc:glycoprotein glucosyltransferase) (UDP-glucose ceramide glucosyltransferase-like 1)
SVASGHLYE-RFLRIMMLSVLKNTKTP--VKFWFLKNYLSPTFKEFIPYM--ANEY-NFQYELVRIIWGYKILFLDVLFPLVVDKFLFVDADQIVRTD-LKELRDFNLDGAPYGYTPFCDSR-REMDGYRFWKSGYWASHLAGRK--YHISALYVVDLKKFRKIAAGDGLSQDSLSNLDQDLPNNMIHQVPIKSL--PQE--WLTIDLCNP--MTKEPK-----------L
>GT24|CAA89981.1|Ascomycota_Fungi Saccharomyces cerevisiae;KRE5;Killer toxin-resistance protein 5
---SGPDEE-ERYMQMILSILSKCPET--QKFILDQPFISDTLRKSCEYINSSDEM-RGNVIFLRRRDVSRFLFLDVLLPQNISKVLYMSPTEVPLDP-FDIFQFQGLKRAPLGLF--------RMSGDGYWKEGYWEKMLRENNLEYSTEPAFLVNLERFRELDAGDRISTDSLVNIGQDLVNNLQLEVPIRFL--KGS--YL---------------------------
>GT24|CAB04207.2|Nematoda_Metazoa Caenorhabditis elegans;-;UDP-Glucose Glycoprotein glucosylTransferase
SLASGHLYE-RFMRIMMTSVLNNTKTK--VKFWLLKNYLSPKFKETIPKL--AEFY-KFEFELVRVMWGYKILFLDVLFPLNVDKIIFVDADQVVRAD-LQELMDFNLNGAPYGYVPFCESR-TEMDGFRFWKSGYWKNHLMGRK--YHISALYVVDLKAFREFSAGDSLSADSLSNLDQDLPNNMLHEVPIKSL--PQE--WLTIDLCNP--LTKEPK-----------L
>GT24|CCD71302.1|Nematoda_Metazoa Caenorhabditis elegans;-;UDP-Glucose Glycoprotein glucosylTransferase
SLASGHLYE-RFMRIMIVSVMKNTKHP--VKFWLLKNYLSPQFKETLPTL--AKHY-GFEYELIRIMWGFKILFLDVLFPLDVQKVIFVDADQVVRAD-LMELMKFDLGNAPYGYVPFCESR-KEMDGFRFWKQGYWANHLAGRR--YHISALYVIDLQKFRQIAAGDGLSGDSLANLDQDLPNNMIHQVKIKSL--PQE--WLTIDLCNP--LTKEPK-----------L
>GT24|EFA83957.1|Amoebozoa_Protista Polysphondylium pallidum;-;Glycosyltransferase
SVASGHLYE-RFLKIMMLSVKKNTNNP--VKFWFLKNYLSPKFVDFIPFF--AKKY-GFDYELVRIIWAYKILFLDVLFPLDVKKVIFVDADQVVRTD-LKELWDMNLQGAALGYTPFCDSN-KDTEGFRFWKSGFWRDHLRGKP--YHISALYVIDLQRFRRIIAGDQLSRDSLANLDQDLPNYLQHSVKIFSL--PQE--WLTIDLCNP--MTKTPK-----------L
>GT24|EMT29944.1|Streptophyta_Viridiplantae Aegilops tauschii;-;UDP-glucose:glycoprotein glucosyltransferase 1
-------YE-RFLKIMILSVLKKTERP--VKFWFIKNYLSPQFK--------------------RIIWAYKILFLDVIFPLSLRKVIFVDADQIVRTD-MGELYDMDLKGRPLAYTPFCDNN-KEMDGYRFWKQGFWKDHLRGRP--YHISALYVVDLAKFRQTAAGDTLSKDSLSNLDQDLPNYAQHTVPIFSL--PQE--WLTIDLCNP--MTKEPK-----------L
>GT24|KIY49922.1|Basidiomycota_Fungi Fistulina hepatica ATCC 64428;-;Glycosyltransferase family 24 protein
TVASGLLYE-RFASIMILSVLKHTKST--VKFWFIENFLSPSFLEFIPHF--AEEY-GFQYELVRIIWAYKILFLDVLFPLDLKKVIFVDADQIVRTD-LKELVDLDLHGAPYGYTPMGDDN-VEMEGFRFWKTGYWKDFLRGLP--YHISALYVVDLVRFRQMAAGDQLSADSLSNLDQDLPNNLQHEIPIFSL--PED--WLTIDLCNP--LTKEPK-----------L
>GT24|XP_001415784.1|Chlorophyta_Viridiplantae Ostreococcus lucimarinus;-;Glyco_transf_24 domain-containing protein
SVASGHLYE-RFLKIMMASVKRSTKNP--VKFWFIKNWLSPSFKDFLPYM--AKEY-DFEYELVRIIWAYKILFLDVLFPLELNKVIFVDADQIVRAD-MSELWTMDLHGAPYGYTPMCDNN-KEMEGFRFWKQGFWRDHLRGRP--YHISALYVVDLDRFRAMAAGDQLSRDSLANLDQDLPNYAQHDVPIFSL--PQP--WLTIDLCNP--LTKEPK-----------L
>GT24|XP_001623889.1|Cnidaria_Metazoa Nematostella vectensis;-;Predicted protein (Fragment)
SLASGHLYE-RFMRIMMLSVLKHTKSN--VKFWFLKNYLSPTFKAFLPIM--AKEY-GFEYELVRVIWGYKILFLDVLFPLNVKRILFVDADLIVRTD-LQELMDMDLEGAPYAYTPFCSSR-KEMDGFRFWNQGYWRSHMGGRP--YHISALYAIDLKRFRRLAAGDGLSQDSLANLDQDLPNNMIHQVPIKSL--PQE--WLTIDLCNP--QTKEPK-----------L
>GT24|XP_002120850.2|Chordata_Metazoa Ciona intestinalis;-;UDP-glucose:glycoprotein glucosyltransferase 1 isoform X2
SLASGHLYE-RLMRIMMLSVMRHTTSN--VKFWVLKNYLSPQFKDFIPHM--AEEY-GFEYELVRTMWGYKILFLDVLFPLNVEKIIFVDADQIVRAN-LKELRDLDLEGNPYGYTPFCSDR-TEMDGFRFWKGGYWAQHLAGRK--YHISAIYVVDLKKFRQIAAGDGLSQDSLANLDQDLPNNMIHQVGIKSL--PQE--WLTIDLCNP--LTKEPK-----------L
>GT25|AAG60609.1|Chordata_Metazoa Homo sapiens;GT252;Procollagen galactosyltransferase 2 (EC 2.4.1.50) (Collagen beta(1-O)galactosyltransferase 2) (ColGalT 2) (Glycosyltransferase 25 family member 2) (Hydroxylysine galactosyltransferase 2)
FMINLKRRK-DRRDRMLRTLYEQ-IEVKIVEAVKALNLKALNIEMLPGYDPYSSRPLTRGEIGCFLSHYSVWKEVIDR---ELEKTLVIEDDVRFEHQFKKKLMKDNIDQAQLDWELIYIGR--KRMQVKEP--EKAVPNVANLVEASYW-TLGVISLEGAQKLV---GANPFKM-LPVDEFL------------------------------------------------
>GT25|AAN10543.1|Arthropoda_Metazoa Drosophila melanogaster;GLT25;Glycosyltransferase 25 family member (EC 2.-.-.-)
FMINLKRRP-ERREKMERLFDEI-IEAEHFPAVKTERLLEMGVRFLPGYDPYHHRAMTMGEIGCFLSHYNIWVMMVRK---QLKEVLILEDDIRFEPYFRQNAVRILNQARNAAQYDIYFGR-KRLKEESEPAVENADNLVHAGYSY----TLGVISLQGALKLL----AAKPDKLIPVDEFLPLMFDRHPKTWTEAFP--------------------------------
>GT25|AET14987.1|Proteobacteria_Bacteria Pasteurella multocida 36950;-;lipooligosaccharide biosynthesis protein
YVISLSSAR-ERRQHVMNEF-SKHVPFQFFDAVSSQL--DFLIQRLVPNL--NGTSLTGGEKGCLISHVALWHKCIQD---NLPYIAIFEDDILLGRDARAFLAEDEWLFSRFNCDDIFIIR-LETFLQETICEPNPVYCGRDFLALEHLGTAGIISLGAAKYLL---EIFKNNNIFPIDHLIFNRFLAGELMVYQLSPALCIQLDSQLES---ERKNKARNKVYHIFTK-
>GT25|BAA96026.1|Chordata_Metazoa Homo sapiens;GT253;Inactive glycosyltransferase 25 family member 3 (Cerebral endothelial cell adhesion molecule)
FVISLARRP-DRRERMLASLWEM-ISGRVVDAVNSSAIRNLGVDLLPGYDPYSGRTLTKGEVGCFLSHYSIWEEVVAR---GLARVLVFEDDVRFESNFRGRLER-LMEDVEAEKLSWDLIY-L-GRKQVNPEKETAV-EGLPGLVVYSYWTLAALRLAGARKLL----ASQPRRMLPVDEFL------------------------------------------------
>GT25|CAA84699.2|Nematoda_Metazoa Caenorhabditis elegans;-;Uncharacterized protein
YLVNLKRRQ-ERLNRMQKIFDIL-IEYSLLEATQKLDEL---PEELKNYQILEGRPMKNGEIGCFLSHYRVWQDVVQH---NYEKVIVFEDDLRFSHDGLTRIREVLQ---DLDASHWDLIY-L-GRKKQSENEELWISQHRHLSSVSYW-TLGMLSLNGARKLL---RPNPLKMV-PVDEYLPIMFNKHPKDWSLHFEPLDVEL--------------------------
>GT25|CBY23734.1|Chordata_Metazoa Oikopleura dioica;-;Uncharacterized protein
FVINLERRQ-DRKERMDFCM-RLGIKYTLVPAVKQDDIDGLGIRQLPGFDPHKPRTITRGEVGCFLSHYYLWQKMVPG---ET--YLVLEDDVRFGPDFVGDLRRTLREAKDIEWDLIYVGR-KRGPGADNDV---EVMVTESISNVSFW-TLALITGDAAKVLV---D-EKPEKLIPVD---------------------------------------------------
>GT25|CCW66797.1|Euglenozoa_Protista Phytomonas sp. isolate Hart1;-;Uncharacterized protein
YVINLDRRP-DRWSHISADLFLKGVSPTRVSGVSTLDEEGYRRFVQPIAQKLFGMDLTPGAIGCALSHRLVWEKVVAS---RQTAALILEDDAELSPRFHRQLGP-LWERV---PKDWGIVY-LGGLDLLAEGKPPRPYVAEGVRRAGHRELTAVVNEASARRCL---ELS-----LPLTWQIDTHITSELNEAYIVDPMSYVFLS-------------------------
>GT25|NP_078932.2|Chordata_Metazoa Homo sapiens;GT251;Procollagen galactosyltransferase 1 (EC 2.4.1.50) (Collagen beta(1-O)galactosyltransferase 1) (ColGalT 1) (Glycosyltransferase 25 family member 1) (Hydroxylysine galactosyltransferase 1)
FMINLRRRQ-DRRERMLRALQAQ-IECRLVEAVKAMNVEALGIQMLPGYDPYHGRPLTKGELGCFLSHYNIWKEVVDR---GLQKSLVFEDDLRFEIFFKRRLMNLMRDVERE-GLDWDLIY-VGRKRMQVEHPEKAVPRVRNLVEASYW-TLAVISLQGARKLL---AAEPLKM-LPVDEFL------------------------------------------------
>GT25|XP_002506971.1|Chlorophyta_Viridiplantae Micromonas commoda;-;Glycosyltransferase family 25 protein
HVISLARSF-ERRRACVEALQIQNISYEIFSAVLHEREIARYAGKKKRAALHRTSMMRRDELGCSMSHVRLWMRLLST---NLPFFVILEDDARVVPNFQRRIVDAL----RQLPKDWD-LF-YAFACDIRPGEYLRGNIRQF----GGACTLGAISRKGAEHLLF--DAAIGE--LPVDKMM------------------------------------------------
>GT25|XP_007407581.1|Basidiomycota_Fungi Melampsora larici-populina 98AG31;-;Uncharacterized protein
-VVSLKSRT-DRRNHMKKLNSFLDLKIKFSDAIYNDSRVNEIVNRVGNQTKADKKMAEVGHVACRMSHRMAIQAAEDD---HDEFTLILEDDVDIESAFKYLSGTIL----RDVPKDWDMIF-FGTDFSD-ESRHGRDPRTSNFYIYIEPGGHGALSPKGRKLIL---DLLSNRPELPIDIFMYLARLH--ANLFSIIPDLIIQFKSDIFN---TKDGMH-----------
>GT25|XP_009053307.1|Mollusca_Metazoa Lottia gigantea;-;Uncharacterized protein
YMINLLRRP-ERRERMVHSLYDL-IDAKLFDAIKNLNLDELGIDMLPGFDPYQGRALTMGEIGCFLSHYTIWEEVIAK---KYEKILIFEDDVRFEPYFKRKLYHLMD-EVDKLVPNWDLVY-LGRKRLDRD-SEKMVENSETLIWPSYW-TLSMLSHRGAVKLM---SHKPLRMI-PVDEYLPILFNKHPKDWIQFEPRNLVGEPLLLYP---T----------------
>GT25|YP_008003791.1|Poxviridae_Virus Mythimna separata entomopoxvirus L;-;IMV heparin binding surface protein
HIITIKRNV-ERLNNLQKILNSQNIDYSIFYGIKNID-KKIKNICKTGFK--NTCPYST--LACASSHILLWKYISTL---DRDYVIILEDDTYI--NIEEYNKYIETVKNLLNDSIVFFYS-DCYLLGQNTKKEENLKITYN----FHVSMGCAITPKTAKKLY---YYYIKRVWFHIDFQLNFD-IHNLLNRYIFIAALCNQNKSSMAL---KHNNMIEDTSTPIIRV-
>GT27|AAC13669.1|Nematoda_Metazoa Caenorhabditis elegans;GALT3;Polypeptide N-acetylgalactosaminyltransferase 3 (EC 2.4.1.41) (GalNAc-T1) (Protein-UDP acetylgalactosaminyltransferase 3) (UDP-GalNAc:polypeptide N-acetylgalactosaminyltransferase 3) (pp-GaNTase 3)
IIIVFHNEAWTTLLRTLHSVINRSPRHL-LEIILVDDKSDRDYLVKPLDSIKFIPIHLVHLENRSGLIRARLTGSEMA---KGKILLFLDAHVEVTDGWLEPLVSRVAEDRKRVVAPIIDVISSETTWGGFNWHLNFRWYAVPKRERTIAGGLFAIDKQFFYDIG---SYDEGQVWGGENLEISFRVWMCGGSLEI-HPCSRVG--HVFR---KQTPYTFPGGHHNAARTP
>GT27|AAC13670.1|Nematoda_Metazoa Caenorhabditis elegans;GALT4;Polypeptide N-acetylgalactosaminyltransferase 4 (pp-GaNTase 4) (EC 2.4.1.41) (Protein-UDP acetylgalactosaminyltransferase 4) (UDP-GalNAc:polypeptide N-acetylgalactosaminyltransferase 4)
VIITYHNEARSSLLRTVFSVFNQSPEEL-LEIVLVDDNSQDVEIGKEL----QQRITVLRNNQREGLIRSRVKGAQVA---RAPVLTFLDSHIECNQKWLEPLLARIAENPKAVVAPIIDVINSADLRGGFDWTLVFRWEFMNEQLRTMAGGLFAISKEWFNELG---TYDLDEVWGGENLEMSFRVWQCGGSLEI-MPCSRVG--HVFR---KKHPYTFPGGQKNTRRAP
>GT27|AAC13672.1|Nematoda_Metazoa Caenorhabditis elegans;GALT5;Polypeptide N-acetylgalactosaminyltransferase 5 (pp-GaNTase 5) (EC 2.4.1.41) (Protein-UDP acetylgalactosaminyltransferase 5) (UDP-GalNAc:polypeptide N-acetylgalactosaminyltransferase 5)
VIICFHNEAWSVLLRTVHSVLERTPDHL-LEVVLVDDFSDMDHTKRPLEEMSFGKVKILRMEKREGLIRARLRGAAVA---TGEVLTYLDSHCECMEGWMEPLLDRIKRDPTTVVCPVIDVIDKATSVGGFDWGLQFNWHSIPERDRTMAGGLFSIDKEYFEKLG---TYDPGDIWGGENLELSFKIWMCGGTLEI-VPCSHVG--HVFR---KRSPYKWRTGKRNSIRL-
>GT27|AAC13674.1|Nematoda_Metazoa Caenorhabditis elegans;GALT6;Probable N-acetylgalactosaminyltransferase 6 (EC 2.4.1.-) (Protein-UDP acetylgalactosaminyltransferase 6) (UDP-GalNAc:polypeptide N-acetylgalactosaminyltransferase 6) (pp-GaNTase 6)
VIIVYHNEAYSTLLRTVWSVIDRSPKEL-LEIILVDDFSDREFLRYPTLDTLPPTIKIIRSKERVGLIRARMMGAQEA---QGDVLTFLDSHCECTKGWLEPLLTRIKLNRKAVPCPVIDIINIEMFRGGFNWNLQFRWYGMPMAKQTMAGGLFSINRNYFEELG---EYDPGDIWGGENLEMSFRIWQCGGRVEI-LPCSHVG--HVFR---KSSPHDFPGKNTNLLRVP
>GT27|AAC13678.1|Nematoda_Metazoa Caenorhabditis elegans;GALT8;Probable N-acetylgalactosaminyltransferase 8 (EC 2.4.1.-) (Protein-UDP acetylgalactosaminyltransferase 8) (UDP-GalNAc:polypeptide N-acetylgalactosaminyltransferase 8) (pp-GaNTase 8)
VVVIHHNEALSTILRMINGIIEFTPKSL-LEIVLYEDASEEDHVLTKHLEFAIGKLIIKRSEYRQGLIRAKVHASRLA---TGEVIVFMDSHCEVAERWLEPLLQPIKEDPKSIVLPVVDLINMV-AKSGFDWGFTFKWIYLPWEYFAMPGGLLAMRKEYFVELG---EYDMGEIWGSENIELSLKAWLCGGRVVV-APCSRVG--HVFR---MRRPYTSKPGLYNAVRVP
>GT27|AAC13679.1|Nematoda_Metazoa Caenorhabditis elegans;GALT9;Probable N-acetylgalactosaminyltransferase 9 (EC 2.4.1.-) (Protein-UDP acetylgalactosaminyltransferase 9) (UDP-GalNAc:polypeptide N-acetylgalactosaminyltransferase 9) (pp-GaNTase 9)
VIIIFTDEAWTPLLRTVHSVINRSPPEL-LEVILLDDNSKRQELQEPLDEIKFGKVRLIRKHDRHGLIRAKLAGAREA---VGDIIVFLDSHCEANHGWLEPIVQRISDERTAIVCPMIDSISWSLSTGGFSWALHFTWEGLSEEEKTMAGGLLAANREYFFEVG---GYDEEDIWGGENLEISFRAWMCGGSIEF-IPCSHVG--HIFR---AGHPYNMTGRGTNSKRL-
>GT27|AAD38630.1|Arthropoda_Metazoa Drosophila melanogaster;GALT3;Polypeptide N-acetylgalactosaminyltransferase 3 (pp-GaNTase 3) (EC 2.4.1.41) (Protein-UDP acetylgalactosaminyltransferase 3) (UDP-GalNAc:polypeptide N-acetylgalactosaminyltransferase 3)
VIIVFHNEAWSVLLRTITSVINRSPRHL-LEIILVDDASDRSYLKRQLESVKLVPTRIFRMKKRSGLVPARLLGAENA---RGDVLTFLDAHCECSRGWLEPLLSRIKESRKVVICPVIDIISFENHWGAFNWQLSFRWFSSDRKRQGMAGGLFAIDRKYFYEMG---SYDSNRVWGGENVEMSFRIWQCGGRVEI-SPCSHVG--HVFRS--S-TPYTFPGGLTNLARA-
>GT27|AAD45821.1|Chordata_Metazoa Homo sapiens;GLT11;Polypeptide N-acetylgalactosaminyltransferase 11 (EC 2.4.1.41) (Polypeptide GalNAc transferase 11) (GalNAc-T11) (pp-GaNTase 11) (Protein-UDP acetylgalactosaminyltransferase 11) (UDP-GalNAc:polypeptide N-acetylgalactosaminyltransferase 11)
VVICFYNEAFSALLRTVHSVIDRTPAHL-LEIILVDDDSDFDDLKGELDEVQYPKIKVIRNTKREGLIRGRMIGAAHA---TGEVLVFLDSHCEVNVMWLQPLLAAIREDRHTVVCPVIDIISSPVVRGGFNWGLHFKWDLVPLSELTMAGGLFAMNRQYFHELG---QYDSGDIWGGENLEISFRIWMCGGKLFI-IPCSRVG--HIFR---KRRPYGSPEGTHNSLRLP
>GT27|AAF44871.1|Arthropoda_Metazoa Drosophila melanogaster;GLT35;Polypeptide N-acetylgalactosaminyltransferase 35A (EC 2.4.1.41) (Protein l(2)35Aa) (Protein-UDP acetylgalactosaminyltransferase 35A) (UDP-GalNAc:polypeptide N-acetylgalactosaminyltransferase 35A) (pp-GaNTase 35A) (dGalNAc-T1)
IVMCFYNEHKMTLMRSIKTVLERTPSYL-LEIILVDDHSDLPELEFHLDLARKDNLRYIKNEQREGLIRSRVIGAREA---VGDVLVFLDSHIEVNQQWLEPLLRLIKSENATLAVPVIDLINPL-VRGGFNWGLHFRWENLPEGTKTMAGGLFAVNRKYFQHLG---EYDMADIWGGENIEISFRAWQCGGAIKI-VPCSRVG--HIFR---KRRPYTSPDGLKNSLRL-
>GT27|AAF47689.1|Arthropoda_Metazoa Drosophila melanogaster;GALT6;N-acetylgalactosaminyltransferase 6 (EC 2.4.1.41) (Protein-UDP acetylgalactosaminyltransferase 6) (UDP-GalNAc:polypeptide N-acetylgalactosaminyltransferase 6) (pp-GaNTase 6)
VIIIFYNEYLSVLMRSVHSLINRSPPEL-MEIILVDDHSDREYLGKELETIAHKWVRVVRLPRRTGLIGARAAGARNA---TAEVLIFLDSHVEANYNWLPPLLEPIALNKRTAVCPFIDVIDDEGARGAFDWEFFYKRLPLLPE--IMAGGLFAISREFFWELG---GYDEGDIWGGEQYELSFKIWMCGGEMYD-APCSRIG--HIYRG--PRNHQPSPRKHKNYKRV-
>GT27|AAF48851.1|Arthropoda_Metazoa Drosophila melanogaster;GALT7;N-acetylgalactosaminyltransferase 7 (EC 2.4.1.41) (Protein-UDP acetylgalactosaminyltransferase 7) (UDP-GalNAc:polypeptide N-acetylgalactosaminyltransferase 7) (pp-GaNTase 7) (dGalNAc-T2)
VIIVFHNEGFSVLMRTVHSVIDRSPTHM-LEIILVDDFSDKENLRSQLDEVLFGLVKVIRNKEREGLIRTRSRGAMEA---TGEVIVFLDAHCEVNTNWLPPLLAPIYRDRTVMTVPIIDGIDYGTFRGIFEWGMLYKENEVPRRERTHAGGLFAINREYFLELG---AYDPGLVWGGENFELSFKIWQCGGSIEW-VPCSRVG--HVYR---GFMPYNFGKLTINYKRVP
>GT27|AAF49587.1|Arthropoda_Metazoa Drosophila melanogaster;GALT8;Polypeptide N-acetylgalactosaminyltransferase 8 (pp-GaNTase 8) (EC 2.4.1.41) (Protein-UDP acetylgalactosaminyltransferase 8) (UDP-GalNAc:polypeptide N-acetylgalactosaminyltransferase 8)
VVITYHNEEASVLLRTLSSLRSRTPIQL-LEVILVDDGSTQADEK-LNDFKIFNMVQHRRITTQVGLMHARVVGAELA---LADVLVFLDSHVEVTKGWLEPLIAPILEDNRTCTTPIIDTIDKP-SRGFFNWEFNYIQLPLLKEE-IMNGGLFAIGREWFSELG---GYDKGKIWGAEQFELSLKLWLCGGQILE-VPCSRVG--HLFRN--FQIRYTNKDKSRNYRRVP
>GT27|AAF49589.2|Arthropoda_Metazoa Drosophila melanogaster;GLT12;Putative polypeptide N-acetylgalactosaminyltransferase 12 (pp-GaNTase 12) (EC 2.4.1.41) (Protein-UDP acetylgalactosaminyltransferase 12) (UDP-GalNAc:polypeptide N-acetylgalactosaminyltransferase 12)
IIMIFRNEQLVVLLRTLHSLVERTPKYL-YELILVNDHSDTDFWNDKLSYHRIPKARILHLPEQVGLIKARNLAASEA---KAENLVFVDAQVEFTNGWLSPLLDTIAEQSYTLATPILDNLDIE-RRGMYDWSLTRREVPLSRA--AVRTSVFAIPAVWFQDIS---NFDNNRGFGAAELELSFKVWCTGGRIVQ-VPCSRVG--HLQPK--DLKRYGDLHKSRNLKRIP
>GT27|AAF52218.2|Arthropoda_Metazoa Drosophila melanogaster;GALT5;Polypeptide N-acetylgalactosaminyltransferase 5 (pp-GaNTase 5) (EC 2.4.1.41) (Protein-UDP acetylgalactosaminyltransferase 5) (UDP-GalNAc:polypeptide N-acetylgalactosaminyltransferase 5)
IVIVFHNEAWTTLLRTVWSVINRSPRAL-LEIILVDDASERDFLGKQLEEVALVKTFVLRTEKRSGLIRARLLGAEHV---SGEVITFLDAHCECTEGWLEPLLARIVQNRRTVVCPIIDVISSDSTWGGFNWKLNFRWYRVPSRERTMAGGLFSIDKDYFYEIG---SYDEGDIWGGENLEMSFRIWQCGGILEI-IPCSHVG--HVFRD--K-SPYTFPGGLHNAARV-
>GT27|AAF57964.3|Arthropoda_Metazoa Drosophila melanogaster;GALT9;Putative polypeptide N-acetylgalactosaminyltransferase 9 (pp-GaNTase 9) (EC 2.4.1.41) (Protein-UDP acetylgalactosaminyltransferase 9) (UDP-GalNAc:polypeptide N-acetylgalactosaminyltransferase 9)
VIICFHNEAWTVLLRTVHSVLDRSPEHL-IKIILVDDYSDMPHLKRQLEDFAYPKVQIIRGQKREGLIRARILGANHA---KSPVLTYLDSHCECTEGWLEPLLDRIARNSTTVVCPVIDVISGGVNVGGFDWNLQFSWHPVPERERTMAGGLFSIDREFFDRLG---TYDSGDIWGGENLELSFKTWMCGGTLEI-VPCSHVG--HIFR---KRSPYKWRSGKKNSVRL-
>GT27|AAG13184.1|Arthropoda_Metazoa Drosophila melanogaster;GALT1;Polypeptide N-acetylgalactosaminyltransferase 1 (pp-GaNTase 1) (EC 2.4.1.41) (Protein-UDP acetylgalactosaminyltransferase 1) (UDP-GalNAc:polypeptide N-acetylgalactosaminyltransferase 1)
VVIIFFNEPYSVLLRTVHSTLSTCNEKA-LEIILVDDGSDNVELGAKLDYVRRPKVTILRLKNRLGLIRARLAGARIA---TGDVLIFLDAHCEGNIGWCEPLLQRIKESRTSVLVPIIDVIDKSFQVGGFQWNGHFDWINLPEREKTMAGGLFAIDRRYFWEVG---SYDEQDGWGGENLEMSFRIWQCGGTIET-IPCSRVG--HIFR---DFHPYKFPNDGINTARMP
>GT27|AAH22021.1|Chordata_Metazoa Homo sapiens;GLTL5;Inactive polypeptide N-acetylgalactosaminyltransferase-like protein 5 (Polypeptide GalNAc transferase 15) (GalNAc-T15) (pp-GaNTase 15) (Protein-UDP acetylgalactosaminyltransferase 15) (UDP-GalNAc:polypeptide N-acetylgalactosaminyltransferase 15)
IVICFYNEECNALFQTMSSVTNLTPHYF-LEIILVDDMSKVDDLKEKLDYLEFGKVKIIRNKKREGLIRARLIGASHA---SGDVLVFLDSHCEVNRVWLEPLLHAIAKDPKMVVCPLIDVIDSPLVRGTFDWNLQFKWDNVFSYEMAMSGGIFAIRRHYFNEIG---QYDKDDFWGRENLELSLRIWMCGGQLFI-IPCSRVG--HISKK--QGKPST---ITHNYLRLP
>GT27|AAH41120.1|Chordata_Metazoa Homo sapiens;GALT2;Polypeptide N-acetylgalactosaminyltransferase 2 (EC 2.4.1.41) (Polypeptide GalNAc transferase 2) (GalNAc-T2) (pp-GaNTase 2) (Protein-UDP acetylgalactosaminyltransferase 2) (UDP-GalNAc:polypeptide N-acetylgalactosaminyltransferase 2) [Cleaved into: Polypeptide N-acetylgalactosaminyltransferase 2 soluble form]
VVITFHNEARSALLRTVVSVLKKSPPHL-IEIILVDDYSNDPEDGALL----KEKVRVLRNDRREGLMRSRVRGADAA---QAKVLTFLDSHCECNEHWLEPLLERVAEDRTRVVSPIIDVINSADLKGGFDWNLVFKWDYMTPEQRMIAGGLFVMDKFYFEELG---KYDMMDVWGGENLEISFRVWQCGGSLEI-IPCSRVG--HVFR---KQHPYTFPGGARNTRRAP
>GT27|AAH47551.1|Chordata_Metazoa Homo sapiens;GLTL6;Polypeptide N-acetylgalactosaminyltransferase-like 6 (EC 2.4.1.41) (Polypeptide GalNAc transferase 17) (GalNAc-T17) (pp-GaNTase 17) (Protein-UDP acetylgalactosaminyltransferase 17) (Putative polypeptide N-acetylgalactosaminyltransferase 17) (UDP-GalNAc:polypeptide N-acetylgalactosaminyltransferase 17)
IIIPFHNEGWTSLLRTIHSIINRTPGSL-IEIILVDDFSEREHLKDKLEEMAF-KVRIVRTKKREGLIRTRLLGASMA---RGEVLTFLDSHCEVNVNWLPPLLNQIPLNHKTIVCPMIDVIDAGDARGAFDWEMYYKRIPIPPELQVMAGGLFAVDRKWFWELG---GYDPGEIWGGEQYEISFKVWMCGGEMFD-VPCSRVG--HIYR---KYVPYKVPSGARNLKRVP
>GT27|AAH60864.1|Chordata_Metazoa Homo sapiens;GLT18;Polypeptide N-acetylgalactosaminyltransferase 18 (EC 2.4.1.41) (Polypeptide GalNAc transferase 18) (GalNAc-T18) (Polypeptide GalNAc transferase-like protein 4) (GalNAc-T-like protein 4) (pp-GaNTase-like protein 4) (Polypeptide N-acetylgalactosaminyltransferase-like protein 4) (Protein-UDP acetylgalactosaminyltransferase-like protein 4) (UDP-GalNAc:polypeptide N-acetylgalactosaminyltransferase-like protein 4)
IVFIFVNEALSVLLRSIHSAMERTPPHL-LEIILVDDNSSNEELKEKLTENSKGFIKVVRHSKQEGLIRSRVSGWRAA---TAPVVALFDAHVEFNVGWAEPVLTRIKENRKRIISPSFDNIKPLAAQ-GFDWELWCRYLNPPKAWWALIGC-FIVDRQYFQEIG---LLDEGEVYGGENVELGIRVWQCGGSVEV-LPCSRIA--HIER---AHKPYT-EDLRRNALRV-
>GT27|AAK63127.1|Chordata_Metazoa Homo sapiens;GLT15;Polypeptide N-acetylgalactosaminyltransferase 15 (EC 2.4.1.41) (Polypeptide GalNAc transferase-like protein 2) (GalNAc-T-like protein 2) (pp-GaNTase-like protein 2) (Polypeptide N-acetylgalactosaminyltransferase-like protein 2) (Protein-UDP acetylgalactosaminyltransferase-like protein 2) (UDP-GalNAc:polypeptide N-acetylgalactosaminyltransferase-like protein 2)
VILCFHDEAWSTLLRTVHSILDTVPRAF-LEIILVDDLSQQGQLKSALSEVA-EGVKLLRSNKRLGAIRARMLGATRA---TGDVLVFMDAHCECHPGWLEPLLSRIAGDRSRVVSPVIDVIDKDLQRGVLDWKLDFHWEPLPEHVRVVPGEVVAMDRHYFQNTG---AYDSLSLRGGENLELSFKAWLCGGSVEI-LPCSRVG--HIYQN--QDS--HSPLDLRNRVRIP
>GT27|AAM29489.1|Arthropoda_Metazoa Drosophila melanogaster;GLT13;Putative polypeptide N-acetylgalactosaminyltransferase 13 (pp-GaNTase 13) (EC 2.4.1.41) (Protein-UDP acetylgalactosaminyltransferase 13) (UDP-GalNAc:polypeptide N-acetylgalactosaminyltransferase 13)
VVISFHNEARSMLLRTIVSLLSRSPEDY-LELILVDDGSQRDVLLDDLKVESYLGLTFLRNQERMGLIWSRNRGASLA---SGRYVLFLDSHCEVNEGWLEPLLERLALNTNLAVSPLLDPIDNELLKGGFDWSLHFHW--LKRQLTAFAGGVLMMSREWFLKLG---SFNPYKIWGGESIELAIKLWLCGGQIEI-VPCSRIG--HIFRR---RHAFDFPPQLHNSKIIP
>GT27|AAM62306.1|Chordata_Metazoa Homo sapiens;GLT17;Polypeptide N-acetylgalactosaminyltransferase 17 (EC 2.4.1.41) (Polypeptide GalNAc transferase-like protein 3) (GalNAc-T-like protein 3) (pp-GaNTase-like protein 3) (Protein-UDP acetylgalactosaminyltransferase-like protein 3) (UDP-GalNAc:polypeptide N-acetylgalactosaminyltransferase-like protein 3) (Williams-Beuren syndrome chromosomal region 17 protein)
IIFIFVNEALSVILRSVHSAVNHTPTHL-LEIILVDDNSDEEELKVPLEEHKYGLVKVVRNQKREGLIRARIEGWKVA---TGQVTGFFDAHVEFTAGWAEPVLSRIQENRKRVILPSIDNIKENSA-HGYSWELWCMYISPPKDWWAMIGCSFVVNRKFFGEIG---LLDPGDVYGGENIELGIKVWLCGGSMEV-LPCSRVA--HIER---KKKPYNSNIGKRNALRV-
>GT27|AAN10370.2|Arthropoda_Metazoa Drosophila melanogaster;GALT4;N-acetylgalactosaminyltransferase 4 (EC 2.4.1.41) (Protein-UDP acetylgalactosaminyltransferase 4) (UDP-GalNAc:polypeptide N-acetylgalactosaminyltransferase 4) (pp-GaNTase 4)
VIFIFFNEHFNTLLRSIYSVINRTPPEL-LQIVLVDDGSEWDVLKQPLDDVQFHLVTIVRNPERQGLIGARIAGAKVA---VGQVMVFFDSHIEVNYNWLPPLIEPIAINPKISTCPMVDTISNKDARGGFDWKMLYKQLPVLPE--VMMGGLFAINTDFFWDLG---GYDDQDIWGGEQYELSFKIWMCGGMLLD-VPCSRVA--HIFRG--PMKPRGNPRGAKNHKRVP
>GT27|AAN75750.1|Arthropoda_Metazoa Drosophila melanogaster;GLT10;Putative polypeptide N-acetylgalactosaminyltransferase 10 (pp-GaNTase 10) (EC 2.4.1.41) (Protein-UDP acetylgalactosaminyltransferase 10) (UDP-GalNAc:polypeptide N-acetylgalactosaminyltransferase 10)
VIIAFHDEHLSVLLRSITSIINRSPVEL-LQIVLVDDDSNLPELGQQLEEAQFKIIHILRLPERRGSIKARMEAIRVS---SCQVLVFLDSHIEVNTNWLPPLLEPIVINPHIVTRPILDAISNTMTRSGFNWWLESESLPIFPEDKVLSGAM-AIDRNYFLNLG---GFDEQDTWEAEKFEISFKVWMCGGMMLY-VPCARVG--HIGKR--PMKSISSPGYARNYKRVP
>GT27|AAO13781.1|Arthropoda_Metazoa Drosophila melanogaster;GLT11;Putative polypeptide N-acetylgalactosaminyltransferase 11 (pp-GaNTase 11) (EC 2.4.1.41) (Protein-UDP acetylgalactosaminyltransferase 11) (UDP-GalNAc:polypeptide N-acetylgalactosaminyltransferase 11)
IVIAIQQEHPHTLLRGIYSVITQTSPYL-LEIVLVHDGHPDLDLIRH---IHKPIVIQLEMESSKGIIHARLTGAGVA---TGDILVFLNGHMEVTRGWLPPLLEPILLNNQTVTEPIVDAISVEPEQLAFDWQLDHIFLPLDQHSWQLEGRVFAIDRKWFWHLG---GWDEGRDYGGDALELSLKVWQCGGLILA-VPCSRVG--IIYKRDEQMAPNRNP--QKNFKRVP
>GT27|AAP34404.1|Chordata_Metazoa Homo sapiens;GALT5;Polypeptide N-acetylgalactosaminyltransferase 5 (EC 2.4.1.41) (Polypeptide GalNAc transferase 5) (GalNAc-T5) (pp-GaNTase 5) (Protein-UDP acetylgalactosaminyltransferase 5) (UDP-GalNAc:polypeptide N-acetylgalactosaminyltransferase 5)
VIMCFVDEVWSTLLRSVHSVINRSPPHL-IEILLVDDFSTKDYLKDNLD-YMQPKVRILRLKERHGLIRARLAGAQNA---TGDVLTFLDSHVECNVGWLEPLLERVYLSRKKVACPVIEVINDNFQRGIFVWPMNFGWRTIPPDVKVMAGGLFSIDKSYFFELG---TYDPGDVWGGENMELSFKVWMCGGEIEI-IPCSRVG--HIFRN--D-NPYSFPKDERNLVRV-
>GT27|AAQ22499.1|Arthropoda_Metazoa Drosophila melanogaster;GALT2;Polypeptide N-acetylgalactosaminyltransferase 2 (pp-GaNTase 2) (EC 2.4.1.41) (Protein-UDP acetylgalactosaminyltransferase 2) (UDP-GalNAc:polypeptide N-acetylgalactosaminyltransferase 2)
VIITFHNEARSTLLRTIVSVLNRSPEHL-IEIVLVDDYSDHPEDGLEL----KDKVRVIRNDKREGLVRSRVKGADAA---VSSVLTFLDSHVECNEMWLEPLLERVREDPTRVVCPVIDVISSADLRGGFDWNLIFKWEYLSPSERMIAGGLFVIDKAYFNKLG---KYDMKDVWGGENLEISFRVWQCGGSLEI-IPCSRVG--HVFR---KRHPYTFPGGARNTRRAP
>GT27|ABL75647.1|Arthropoda_Metazoa Drosophila melanogaster;-;IP16941p
---------------------------------------------------------------------------------------------------------------------------------------------------TMAGGLFSIDREFFDRLG---TYDSGDIWGGENLELSFKTWMCGGTLEI-VPCSHVG--HIFR---KRSPYKWRSGKKNSVRL-
>GT27|BAB13699.2|Chordata_Metazoa Homo sapiens;GALT9;Polypeptide N-acetylgalactosaminyltransferase 9 (EC 2.4.1.41) (Polypeptide GalNAc transferase 9) (GalNAc-T9) (pp-GaNTase 9) (Protein-UDP acetylgalactosaminyltransferase 9) (UDP-GalNAc:polypeptide N-acetylgalactosaminyltransferase 9)
VVFIFVNEALSVILRSVHSVVNHTPSQL-LEVILVDDNSDNVELKFNLDYNKYGLVKIVRNSRREGLIRARLQGWKAA---TAPVVGFFDAHVEFNTGWAEPALSRIREDRRRIVLPAIDNIKAN-AAHGYNWGLRCMYIIPPQDWLAMIGCSFVVDREYFGDIG---LLDPGEVYGGENVELGMRVWQCGGSMEV-LPCSRVA--HIERT---RKPYNNDIDKRNALRA-
>GT27|BAC07181.1|Chordata_Metazoa Homo sapiens;GLT12;Polypeptide N-acetylgalactosaminyltransferase 12 (EC 2.4.1.41) (Polypeptide GalNAc transferase 12) (GalNAc-T12) (pp-GaNTase 12) (Protein-UDP acetylgalactosaminyltransferase 12) (UDP-GalNAc:polypeptide N-acetylgalactosaminyltransferase 12)
VIIAFYNEAWSTLLRTVYSVLETSPDIL-LEVILVDDYSDREHLKERLAN-LGPKVRLIRANKREGLVRARLLGASAA---RGDVLTFLDCHCECHEGWLEPLLQRIHEEESAVVCPVIDVIDGEPQIGGFDWRLVFTWHTVPERERTMAGGLFAVSKKYFEYLG---SYDTGEVWGGENLEFSFRIWQCGGVLET-HPCSHVG--HVFP---KQAPYSRNK-LANSVRAP
>GT27|BAC56889.1|Chordata_Metazoa Homo sapiens;GLT14;Polypeptide N-acetylgalactosaminyltransferase 14 (EC 2.4.1.41) (Polypeptide GalNAc transferase 14) (GalNAc-T14) (pp-GaNTase 14) (Protein-UDP acetylgalactosaminyltransferase 14) (UDP-GalNAc:polypeptide N-acetylgalactosaminyltransferase 14)
IIITFHNEARSTLLRTIRSVLNRTPTHL-IEIILVDDFSNDPDDCKQL----KPKVKCLRNNERQGLVRSRIRGADIA---QGTTLTFLDSHCEVNRDWLQPLLHRVKEDYTRVVCPVIDIINASELRGGFDWSLHFQWEQLSPEQKIIAGGLFVIDKAWFDYLG---KYDMDDIWGGENFEISFRVWMCGGSLEI-VPCSRVG--HVFR---KKHPYVFPDGIKNTKRTP
>GT27|BAF98739.1|Chordata_Metazoa Homo sapiens;-;Polypeptide N-acetylgalactosaminyltransferase (EC 2.4.1.-) (Protein-UDP acetylgalactosaminyltransferase)
VIITFHNEARSTLLRTVKSVLNRTPANL-IEIILVDDFSSDPEDCLLL----RPKVKCLRNDRREGLIRSRVRGADVA---AATVLTFLDSHCEVNTEWLPPMLQRVKEDHTRVVSPIIDVISSADLRGGFDWSLHFKWEQIPLEQKVIAGGIFVIDKSWFNHLG---KYDAQDIWGGENFELSFRVWMCGGSLEI-VPCSRVG--HVFR---KRHPYNFPEGIRNTKRTP
>GT27|BAJ95850.1|Streptophyta_Viridiplantae Hordeum vulgare subsp. vulgare;-;Predicted protein
IVIVFHNEGNSTLLRTLTSIVMRSPTEF-IEIIMVDDASDREYLKDILETVKLVRVEIIRNTQRLGLMKSRLKGAEKA---TGDTLTFLDAHIECSPGWLEYLLYEVKKDRTAVVCPIIDVINSDMTWGGFNWRLNFRWYPVPEEVRTMAGGLFTIDRKYFYEIG---AYDPGEVWGGENLEMSFRVWQCGGKVLI-HPCSHVG--HVFR---KQTPYTFPGGFHNNKRLP
>GT27|CAA22098.1|Nematoda_Metazoa Caenorhabditis elegans;GLT11;Putative polypeptide N-acetylgalactosaminyltransferase 11 (pp-GaNTase 11) (EC 2.4.1.41) (Protein-UDP acetylgalactosaminyltransferase 11) (UDP-GalNAc:polypeptide N-acetylgalactosaminyltransferase 11)
IVVCYFNESPSVLIRMVNSIFDRTKPEH-LEILLVDDSSEWSNATDEAIKHIQEKVKFLKTDKNEGLIRAKIFGARRA---NGEVLVFLDSHCEVNEEWLPPLLDQIKQNRRRVVCPIIDIIDPV-CTGGVNWAMTFKWDYPHRSYFTMAGGLFAIDKEYFFEIG---SYDEGDVWGAENVEISVRIWTCGGELLI-MPCSRVG--HIFRR--QR-PYGIK--GKNSVRLP
>GT27|CAA59380.1|Chordata_Metazoa Homo sapiens;GALT1;Polypeptide N-acetylgalactosaminyltransferase 1 (EC 2.4.1.41) (Polypeptide GalNAc transferase 1) (GalNAc-T1) (pp-GaNTase 1) (Protein-UDP acetylgalactosaminyltransferase 1) (UDP-GalNAc:polypeptide N-acetylgalactosaminyltransferase 1) [Cleaved into: Polypeptide N-acetylgalactosaminyltransferase 1 soluble form]
VVIVFHNEAWSTLLRTVHSVINRSPRHM-IEIVLVDDASERDFLKRPLESVKLVPVHVIRMEQRSGLIRARLKGAAVS---KGQVITFLDAHCECTVGWLEPLLARIKHDRRTVVCPIIDVISSDMTYGGFNWKLNFRWYPVPQRERTMAGGLFSIDRDYFQEIG---TYDAGDIWGGENLEISFRIWQCGGTLEI-VTCSHVG--HVFR---KATPYTFPGGNKNNRRLP
>GT27|CAA63371.1|Chordata_Metazoa Homo sapiens;GALT3;Polypeptide N-acetylgalactosaminyltransferase 3 (EC 2.4.1.41) (Polypeptide GalNAc transferase 3) (GalNAc-T3) (pp-GaNTase 3) (Protein-UDP acetylgalactosaminyltransferase 3) (UDP-GalNAc:polypeptide N-acetylgalactosaminyltransferase 3)
VIIVFHNEAWSTLLRTVHSVLYSSPAIL-LEIILVDDASVDEYLHDKLDEVKF-IVKIVRQRERKGLITARLLGATVA---TAETLTFLDAHCECFYGWLEPLLARIAENYTAVVSPDIASIDSNHNRGNFDWSLSFGWESLPDHEKTFAGGLFSISKEYFEYIG---SYDEEEIWGGENIEMSFRVWQCGGQLEI-MPCSVVG--HVFRS--K-SPHSFPKGARNQVRL-
>GT27|CAA69875.1|Chordata_Metazoa Homo sapiens;GALT4;Polypeptide N-acetylgalactosaminyltransferase 4 (EC 2.4.1.41) (Polypeptide GalNAc transferase 4) (GalNAc-T4) (pp-GaNTase 4) (Protein-UDP acetylgalactosaminyltransferase 4) (UDP-GalNAc:polypeptide N-acetylgalactosaminyltransferase 4)
VIIAFYNEAWSTLLRTIHSVLETSPAVL-LEIILVDDLSDRVYLKTQLETIS-DRVRLIRTNKREGLVRARLIGATFA---TGDVLTFLYCHCECNSGWLEPLLERIGRYETAVVCPVIDTIDGEPMIGGFDWRLTFQWHSVPKQERTMAGGLFAVSKKYFQYLG---TYDTGEVWGGENLELSFRVWQCGGKLEI-HPCSHVG--HVFP---KRAPYARPN-LQNTARAP
>GT27|CAB60270.1|Chordata_Metazoa Homo sapiens;GALT7;N-acetylgalactosaminyltransferase 7 (EC 2.4.1.41) (Polypeptide GalNAc transferase 7) (GalNAc-T7) (pp-GaNTase 7) (Protein-UDP acetylgalactosaminyltransferase 7) (UDP-GalNAc:polypeptide N-acetylgalactosaminyltransferase 7)
VVIVFHNEGWSTLMRTVHSVIKRTPRKY-LEIVLIDDFSNKEHLKEKLDEIKWGLVKVFRNERREGLIQARSIGAQKA---KGQVLIYLDAHCEVAVNWYAPLVAPISKDRTICTVPLIDVINGGGARGAWDWSMLWKRVPLTPQEKAMAGGLCAIEREFFFELG---LYDPSQIWGGENFEISYKIWQCGGKLLF-VPCSRVG--HIYRLEGQGNPPPIYVGLKNYVRVP
>GT27|CAD44532.1|Chordata_Metazoa Homo sapiens;GLT10;Polypeptide N-acetylgalactosaminyltransferase 10 (EC 2.4.1.41) (Polypeptide GalNAc transferase 10) (GalNAc-T10) (pp-GaNTase 10) (Protein-UDP acetylgalactosaminyltransferase 10) (UDP-GalNAc:polypeptide N-acetylgalactosaminyltransferase 10)
IIIPFHNEGWSSLLRTVHSVLNRSPPEL-VEIVLVDDFSDREHLKKPLED-MLPSVRILRTKKREGLIRTRMLGASVA---TGDVITFLDSHCEANVNWLPPLLDRIARNRKTIVCPMIDVIDAGDARGAFDWEMYYKRIPIPPELQVMAGGLFAVDRKWFWELG---GYDPGEIWGGEQYEISFKVWMCGGRMED-IPCSRVG--HIYR---KYVPYKVPAGARNLKRVP
>GT27|CAD44533.2|Chordata_Metazoa Homo sapiens;GLT13;Polypeptide N-acetylgalactosaminyltransferase 13 (EC 2.4.1.41) (Polypeptide GalNAc transferase 13) (GalNAc-T13) (pp-GaNTase 13) (Protein-UDP acetylgalactosaminyltransferase 13) (UDP-GalNAc:polypeptide N-acetylgalactosaminyltransferase 13)
VVIVFHNEAWSTLLRTVYSVINRSPHYL-LEVILVDDASERDFLKLTLENVKLVPVKIIRMEERSGLIRARLRGAAAS---KGQVITFLDAHCECTLGWLEPLLARIKEDRKTVVCPIIDVISSDMTYGGFNWKLNFRWYPVPQRERTMAGGLFSIDRNYFEEIG---TYDAGDIWGGENLEMSFRIWQCGGSLEI-VTCSHVG--HVFR---KATPYTFPGGNKNNRRLP
>GT27|CAJ76949.1|Nematoda_Metazoa Caenorhabditis elegans;GLT10;Putative polypeptide N-acetylgalactosaminyltransferase 10 (pp-GaNTase 10) (EC 2.4.1.41) (Protein-UDP acetylgalactosaminyltransferase 10) (UDP-GalNAc:polypeptide N-acetylgalactosaminyltransferase 10)
VIFPFHEEHNSTLLRSVYSVINRSPPEL-LEIILVDDFSEKPALRQPLEDKNIHIVKVLRTKKREGLIRGRQLGAQDA---TGEILIFLDAHSEANYNWLPPLLDPIAEDYRTVVCPFVDVIDDEGARGSFDWAFNYKRLPLTK--KVMAGGYFAISAKWFWELG---GYDEGDIWGGEQYELSFKVWQCHGRMVD-APCSRVA--HIYRC--KYAPFKNAGMSRNYKRVP
>GT27|CCD70652.1|Nematoda_Metazoa Caenorhabditis elegans;GALT7;Probable N-acetylgalactosaminyltransferase 7 (EC 2.4.1.-) (Protein-UDP acetylgalactosaminyltransferase 7) (UDP-GalNAc:polypeptide N-acetylgalactosaminyltransferase 7) (pp-GaNTase 7)
VVVVFHNEGWTPLLRTVHSVLLRSPPEL-IQVVMVDDDSDKPHLKEKLDKVTFGKVIVVRTEQREGLINARSIGAKHS---TGEVVLFLDAHCEVNTNWLPPLLAPIKRNRKVMTVPVIDGIDYGSHSGIFEWGLLYKETQITERETTHAGGLFAINRLWFKELG---YYDEGQIWGGEQYELSFKIWQCGGGIVF-VPCSHVG--HVYRS---HMPYSFGKFSINMMRVP
>GT27|NP_009141.2|Chordata_Metazoa Homo sapiens;GALT6;Polypeptide N-acetylgalactosaminyltransferase 6 (EC 2.4.1.41) (Polypeptide GalNAc transferase 6) (GalNAc-T6) (pp-GaNTase 6) (Protein-UDP acetylgalactosaminyltransferase 6) (UDP-GalNAc:polypeptide N-acetylgalactosaminyltransferase 6)
VIIVFHNEAWSTLLRTVYSVLHTTPAIL-LEIILVDDASTEEHLKEKLE-YVQQVVRVVRQEERKGLITARLLGASVA---QAEVLTFLDAHCECFHGWLEPLLARIAEDKTVVVSPDIVTIDRVHSRGNFDWSLTFGWETLPPHEKTFAGGLFSISKSYFEHIG---TYDNQEIWGGENVEMSFRVWQCGGQLEI-IPCSVVG--HVFRT--K-SPHTFPKGARNQVRL-
>GT27|NP_059113.1|Chordata_Metazoa Homo sapiens;GALT8;Probable polypeptide N-acetylgalactosaminyltransferase 8 (EC 2.4.1.41) (Polypeptide GalNAc transferase 8) (GalNAc-T8) (pp-GaNTase 8) (Protein-UDP acetylgalactosaminyltransferase 8) (UDP-GalNAc:polypeptide N-acetylgalactosaminyltransferase 8)
VILIFVNEALSIIQRAITSIINRTPSRL-LEIILVDDFSSNGELKVHLDENQYGLLKIIRHPERKGLAQARNTGWEAA---TADVVAILDAHIEVNVGWAEPILARIQEDRTVIVSPVFDNIR-ELAVDGFNWELWCRYDALPQAWISIMG-ILAANRHFLGEIG---SLDGGLIYGGENVELSLRVWQCGGKVEI-LPCSRIA--HLER---HHKPYA-LDLKRNALRV-
>GT27|WP_007715565.1|Firmicutes_Bacteria Brevibacillus sp. BC25;-;Putative glycosyltransferase
IIIPVKNEGDNVRS-TITSLLNTRTTYP-YEVIVVDDASTD---NGCHFLGQQEKIKLI-TTEGIGAAAARNLGVNHA---RGNYFIFCDAHLSFENFWIDRMMELILTKKADGVAPGIASMTKIGYGQNLNQKLEITWYP------ILPGGCFLVTREAFMKVG---GFDRGRIWGFEDIEFSIKMWLFGYTCMV-QPSVKIL--HLFR---QVHPYTVAHE--NMLRM-
>GT27|XP_001654672.1|Arthropoda_Metazoa Aedes aegypti;-;Polypeptide N-acetylgalactosaminyltransferase (EC 2.4.1.-) (Protein-UDP acetylgalactosaminyltransferase)
VIITFHNEATSTLLRTIGSVLKQTPPEL-LEIIVIDDCSTSLEHNLD---FLRPLVRFHRNFVREGLIRSRNIGVAYA---SGDFVLFLDSHCEVNRGWLEPLVDRLTVDSTAVLSPIIDIIDSARLRGGFDWSLRFRWLPVAEEELAISGGVFIVSKTLFQQLG---GFDGGEIWGGESLEFSLKAWLCGAHVEV-VPCSRIG--HVFRR--K-HPYGFPQGLRNTKRIP
>GT27|XP_004993973.1|Salpingoecidae_Choanoflagellida Salpingoeca rosetta;-;Glycosyl transferase
VIFVFYNEHPSVLLRSIHSVLNRTPPQL-LEIILVDDGSDLPWLGQPLEEVQLPKVRIVRNEKRSGLVKARLRGVEES---TAQTFTVLDSHIEVEEGWCEPLMARIKGDRTRVLMPQIDSINGIGCSLGFLWNLIEHSIPIQKKDQTMAGGLFTADREFFWHLG---GYDTEGFWGTENLEFSFRIWQCGGSLEC-MPCSRIH--HIFRK--GGHAYSLPPGAKNKLRT-
>GT27|XP_006236020.1|Chordata_Metazoa Rattus norvegicus;-;PREDICTED: inactive polypeptide N-acetylgalactosaminyltransferase-like protein 5 isoform X1
VIICFYNEEFNTLLRTVSSVMNLSPKHL-LEIILVDDMSEFDDLKAKLDYLEFGKIKLVRNKKREGLIRSRMIGASRA---SGDILVFLDSHCEVNRVWLEPLLHAIAKDHKMVVCPVIDVIDSPIVRGAFDWNLNFRWDDVFSYELAMSGGIFAINRHYFNELG---QYDKDDLWGGENVELSLRIWMCGGQLFI-LPCSRVG--H--NN--KALSKNRLVNSKNLLRVP
>GT31-Glt|AAB18285.2|Nematoda_Metazoa Caenorhabditis elegans;-;Glycoprotein-N-acetylgalactosamine 3-beta-galactosyltransferase 1
LFCWVQTST-IYHDTRSLAINETWIHRCDHGQLFTSERFNDY----STVFKG---IP---DDYYFFKSRYAFHHIYTNISSEFDWYLKADDDTFVIVENLRSFLSTLNPEPHYLGYV---LK-PYLKNG------------------YNAGGGYILSRAALKIFL---YSNATPDDIYEDVGIARCLANAGFNTFS-PSD----TFHQ-----------------------
>GT31-Glt|AAB62835.1|Streptophyta_Viridiplantae Arabidopsis thaliana;-;AT4g00300 protein (A_IG005I10.16 protein) (F5I10.16 protein)
------------------------------------------------------------------------------------WVVMGDDDTVFFTENLVRVLRKYDHQFYYIGAP---SE-SHLQQFSYG---------------MAYGGGFAISYPLAKVLE---KMQDRSDLYGSDDRIHACMAELGFHQFD-VYGNLLGLS-------------------------
>GT31-Glt|AAB66027.1|Nematoda_Metazoa Caenorhabditis elegans;-;Glycoprotein-N-acetylgalactosamine 3-beta-galactosyltransferase 1
IFCFVETST-KYYKDRVPSVASTWLPRCDHGRFFLPYPDIAY----STVYRN---LR---DTYDFRKSIFSLYYSYTSISKHFDWYLKTDDDTFVAMDHLREYLNTLNPEPLYLGYR---LA-PFMNNG------------------YNSGGGYILSNAAMRMFV------EQHNVRLEDRGMGRCLESVGFMPFR-PEIPIIGKWHYFP---------------------
>GT31-Glt|AAB70308.1|Nematoda_Metazoa Caenorhabditis elegans;-;Glycoprotein-N-acetylgalactosamine 3-beta-galactosyltransferase 1
LFCFVETSK-KYFNDRVPSMASTWLPRCDNGRFFLKDEKIPF----STVYRN---LE---DSYYFRKTLLSFYYSYTYISKDFDWYLKADDDNYFMIDHLKEYLDTLDAKPLFLGYR---MK-PFLEGG------------------YNSGGGYLLSNAAVRHLY---HDEKRY-DWAEDRGIARCLASMGFLPFR-PSEMP-----------------------------
>GT31-Glt|AAB71450.1|Streptophyta_Viridiplantae Arabidopsis thaliana;-;YUP8H12.11 protein
-------------------------------------------------------------------------RLFNTSSEEVRWYVFGDDDTIFIPENLARTLSKYDHSWYYIGST---SE-IYHQNSGHD---------------MAFGGGYALSSSLANVLA---RNFDSPHLYGGDSRVYACVLELGFHQF------------------------------------
>GT31-Glt|AAC23643.1|Streptophyta_Viridiplantae Arabidopsis thaliana;-;Glycosyltransferase (Glycosyltransferase (DUF604)) (Putative zinc finger protein)
-------------------------------------------------------------------------------LTDVRWFIMGDDDTVFFVDNLITVLNKYDHQMYYIGGN---SE-SVEQDHSYA---------------MAYGGGIAISYPLAVELV---KLLDGASLYGSDQKIEACLSEIGFHQVD-IRGNPYGLAHPVAV-----T-LHHLD-------Y
>GT31-Glt|AAF00656.1|Streptophyta_Viridiplantae Arabidopsis thaliana;-;At3g11420 (Beta-1,3-N-acetylglucosaminyltransferase lunatic protein, putative (DUF604)) (Glycosyltransferase)
-------------------------------------------------------------------------------LPNVRWFVMGDDDTVFFTENLVKVLSKYDHQMWYIGGN---SE-SVEQDVMHA---------------YAFGGGFALSRPLAARLA---AAMDDFYFYGSDQRIASCISEIGFHQLD-IRGDPYGLA-------------------------
>GT31-Glt|AAF48917.4|Arthropoda_Metazoa Drosophila melanogaster;-;Twiggy, isoform C (Twiggy, isoform E) (EC 2.4.1.122)
VLCWVLTTP-KYHKTRAIHVLRTWGKRCNKIYFMTSEPDDEL----PTVVLT---KP---DRYEWGKTKEAFVHIHEQMRHEADWFIKADDDTYLFLENLRYMLYPYSPTPIYFGFN---YK-MGTHQKNES---------------YMSGGGYVLSREALRIFV---NDTTKEDDHAEDVEMGKCLFNLGRNRFY-PIAPYGALSGNVGM-----D-F------------
>GT31-Glt|AAF51193.3|Arthropoda_Metazoa Drosophila melanogaster;-;Uncharacterized protein (EC 2.4.1.122)
VLCYVYTKP-INHKTQAQAVLETWGRRCNKLIFFSSRSDNLT----GSVELP---VS---PYFRWLKTKMALKYLHDHHLNDADWFLEADDETYVVMENLRYMVYPYSPLAIYFG------------------------------------SGTVMSRAALRRLVELSNPSKCKNAGPTAEKLRECLENVN----------------------------------------
>GT31-Glt|AAF51196.3|Arthropoda_Metazoa Drosophila melanogaster;-;Uncharacterized protein (EC 2.4.1.122)
IICLVLTWP-KKYMSGARAISETWGRHCNRVIYYGSFTISGL----EIVGLN---AS---DTRSWGKTKAAFRHAYRNYGHEVDWFYKADDDTYAVMENMRKLLKPYSPNPIYFGSP---FK-----LGSTL---------------YMSGGGYVLSKSAVELLL---GAAENPGDGTEDYVMGKCLSLLQ----------------------------------------
>GT31-Glt|AAF51197.1|Arthropoda_Metazoa Drosophila melanogaster;-;Uncharacterized protein (EC 2.4.1.122)
VLCMVLTSP-KTHHTRAIHIKRTWGRRCNKLIFMSTKADKEL----GSVALN---VR---EGYSWPKTRAALQYVYKHHFQKYDWFLKADDDTYFIMENLRAFLHAHNFEPVYFGNK---FR-QHVKEG------------------YMSGGGYVLSKMALHRLI---KNSSIRNYGYEDVELGRCLAGVGFIPFS-PLH-------------------------------
>GT31-Glt|AAF51199.2|Arthropoda_Metazoa Drosophila melanogaster;-;IP15602p
ILCMVLTCP-ENVQSLARSVYETWGQRCSRLIFASSEDYEPL----GVVGVV---EP---TGYEWNKTREGFRHVWEHYAGDYDWFLKADDDTYVVMENLQHLLRGFDPTPVFFGYK---MS-RY----NVS---------------YMSGGSYILSREALHRFY---ESEVIKKMGIEDFYMGICMQNVG----------------------------------------
>GT31-Glt|AAF52326.3|Arthropoda_Metazoa Drosophila melanogaster;-;Uncharacterized protein, isoform A (EC 2.4.1.-)
IYFAIKTCA-KFHKERIPIIERTWAADARNRRYYSDVADVGI----PAIGTG---IP---NVQTCAKTMAILQLSLKDIQLDIRWLMLVDDDTLLSVPRVSALLCRHNAELVYLGQR---YG-YRLAPDGFN---------------YHTGGGIVLSLPLV-RLI---VQRCSSASAPDDMILGYCLQALGMHQAR-PQDYAGELQLHAPL-----T-FHKFW-------N
>GT31-Glt|AAF52723.1|Arthropoda_Metazoa Drosophila melanogaster;-;Core 1 galactosyltransferase A, isoform B (EC 2.4.1.122)
VLCWIMTNP-SNHQKKARHVKRTWGKRCNKLIFMSSAKDDEL----DAVALP---VG---EGRNWGKTKEAYKYIYEHHINDADWFLKADDDTYTIVENMRYMLYPYSPTPVYFGCK---FK-PYVKQG------------------YMSGGGYVLSREAVRRFV---VEAKLSNSGAEDVEIGKCLQNVNFFPFV-PEHH------------------------------
>GT31-Glt|AAF75069.1|Streptophyta_Viridiplantae Arabidopsis thaliana;-;F24B9.5 protein
------------------------------------------------------------------------------------WFVMGDDDTVFVVDNVVNVLSKYDHQFYYVGSS---SE-AHVQNFSYS---------------MAFGGGFAISYALALELL---RMQDRPGLYGSDDRIQACMTELGFHQY------------------------------------
>GT31-Glt|AAF81315.1|Streptophyta_Viridiplantae Arabidopsis thaliana;-;F22L4.11 protein (Transferring glycosyl group transferase (DUF604))
----------------------------------------------------------------------------TELEKNVRWIVMGDDDTVFFPENLVKVLRKYDHQFYYIGSS---SE-SHIQKFSYG---------------MAYGGGFAISYPLAKALE---KMQDRSELYGSDDRIHACMSELGFHQ-------------------------------------
>GT31-Glt|AAF81981.1|Chordata_Metazoa Homo sapiens;C1GLT;Glycoprotein-N-acetylgalactosamine 3-beta-galactosyltransferase 1 (EC 2.4.1.122) (B3Gal-T8) (Core 1 O-glycan T-synthase) (Core 1 UDP-galactose:N-acetylgalactosamine-alpha-R beta 1,3-galactosyltransferase 1) (Beta-1,3-galactosyltransferase) (Core 1 beta1,3-galactosyltransferase 1) (C1GalT1) (Core 1 beta3-Gal-T1)
ILCWVMTGP-QNLEKKAKHVKATWAQRCNKVLFMSSEENKDF----PAVGLK---TK---EGRDYWKTIKAFQYVHEHYLEDADWFLKADDDTYVILDNLRWLLSKYDPEPIYFGRR---FK-PYVKQG------------------YMSGGGYVLSKEALKRFV---DAFKTHSSSIEDLALGRCMEIMNFHPFV-PEHHIKGLFHYVST-----T-MYELE-------Y
>GT31-Glt|AAG51285.1|Streptophyta_Viridiplantae Arabidopsis thaliana;-;Beta-1,3-n-acetylglucosaminyltransferase radical fringe protein, putative (DUF604) (Glycosyltransferase)
------------------------------------------------------------------------------SLPNVRWFVLGDDDTIFNVHNLLAVLSKYDPEMVYIGNP---SE-SHSANSYFS---------------HAFGGGIAISAEALSRIH---DDCLDPKLYGSDDRLHACITELGFHQWD-IKGNAHGLS-------------------------
>GT31-Glt|AAH11930.1|Chordata_Metazoa Homo sapiens;C1GLC;C1GALT1-specific chaperone 1 (C38H2-like protein 1) (C38H2-L1) (Core 1 beta1,3-galactosyltransferase 2) (C1Gal-T2) (C1GalT2) (Core 1 beta3-Gal-T2) (Core 1 beta3-galactosyltransferase-specific molecular chaperone)
VYCIILVKP-KDVSLWA-AVKETWTKHCDKAEFFSSENVKVF----ESINMD---TN---D---WLMMRKAYKYAFDKYRDQYNWFFLARPTTFAIIENLKYFLLKKDPQPFYLGHT--------IKSGDLE---------------YVGMEGIVLSVESMKRLL---NIPEKEQGGMEDKQLAVCLKYAG----------------------------------------
>GT31-Glt|AAN71398.1|Arthropoda_Metazoa Drosophila melanogaster;-;RE41083p
ILCWVMTNP-TNHKKKARHVKRTWGKRCNILLFMSSGADEEL----PTVKLD---VG---EGREWAKVKEAFKYVYHHHYNDADFFYKADDDTYAVIENMRYMLYPYNPTPVHFGFK---FK-PFVKQG------------------YMSGGGYILSREALRRFV---VEGKMPGTVVEDIEIGRCMENLNMFPFI-PEHH------------------------------
>GT31-Glt|AAO37647.1|Chordata_Metazoa Homo sapiens;B3GLT;Beta-1,3-glucosyltransferase (Beta3Glc-T) (EC 2.4.1.-) (Beta 3-glucosyltransferase) (Beta-3-glycosyltransferase-like)
IFVAVKTCK-KFHGDRIPIVKQTWESQASLIEYYSDYTENSI----PTVDLG---IP---NTDRCGKTFAILERFLNRSQDKTAWLVIVDDDTLISISRLQHLLSCYDSKPVFLGER---YG-YGLGTGGYS---------------YITGGGMVFSREAVRRLL---ASKCRSNDAPDDMVLGMCFSGLGFHQAR-PVDYPKDLSHQVPI-----S-FHKHW-------N
>GT31-Glt|ABC66121.2|Arthropoda_Metazoa Drosophila melanogaster;-;Uncharacterized protein, isoform A (EC 2.4.1.122)
ILCLVLTMP-SSHATKAALVNRTWGARCNKLIFMSSQTDSNL----NILQIN---KS---ESRKYAKVRTGMAYVHKHYLNEYDWFLKADDDTYIVMENLRLFLYPYDPSSVYFGCR---FK-AYFSQG------------------YMSGGGYVLSRDALRRLL---NSTTILNGESEDVQIGHCLQDVGFHRFL-PVNWLEGFFH------------------------
>GT31-Glt|ABC66141.1|Arthropoda_Metazoa Drosophila melanogaster;-;Uncharacterized protein, isoform B (Uncharacterized protein, isoform C) (EC 2.4.1.-) (EC 2.4.1.122)
IFCIISTYA-YRHGHAAIHIHRTWVRHCDHYLFVSDDIDNHLE---PAVFMN---MP---DKWHR----AYLEYVYKYHFHQGDWFLYCNDDNFVVVDNLRHMLKTYSPELIYFGCK---LR----TTNGLV---------------FMLEGGIVFSAAALKRFL---TNESISETKGNDFTLGRCLTNVNRHRFL-PFD-------------------------------
>GT31-Glt|ABE01212.1|Arthropoda_Metazoa Drosophila melanogaster;-;IP13057p
VLCMVLTLP-KNHQSRVRRVKGTWGRRCNKLIFISSQEDREL----GVIDVG---VP---EDRNYLKMRKALEYVYRNHGEDYDWFLKADDDTFVIMENLRFLLYPYDPAALYFGHR---FR-TTFPQG------------------YMSGGGYVMSRDALRRLF---NNSQFINNNSEDRQIGFCLQNVG----------------------------------------
>GT31-Glt|ABE66154.1|Streptophyta_Viridiplantae Arabidopsis thaliana;-;AT5G12460.1 (Fringe-like protein) (Fringe-like protein (DUF604))
--------------------------------------------------------------------FYSLQESFKKASKETRWFVIGDDDTLFFLDNLVKALDRYNHKHYYVGMN---SENWSNAIFAFD---------------MGYGGGYALSYPTVVTLL---SNMEEKLGVYSDLLSFRCLADLGMHQND-LHGDISGLS-------------------------
>GT31-Glt|ACI88736.1|Streptophyta_Viridiplantae Arabidopsis thaliana;-;At4g11350 (Glycosyltransferase) (Transferring glycosyl group transferase (DUF604))
------------LDEEVKIKSETGDQESLPSVRISGDTS-SF----PYTNKQ---GH---RSAISRIVSETLMSLDSESKKNVRWFVMGDDDTVFVTDNLIRVLRKYDHQMYYIGSL---SE-SHLQNFSYG---------------MAYGGGFAISYPLAVALS---KMQDQPALYGSDDRMQACMAELGFHQYD-VHGNLFGLAHPITV-----S-MHHL---------
>GT31-Glt|ADG66891.1|Planctomycetes_Bacteria Planctopirus limnophila;-;Glycosyl transferase family 2
------------HRDKREAIRDTWAPIGDDVEFIQGDANSNT----GTLRVP---CK---DTYDIHKVQHFCRWATR--FRSFKWLFKCDDDTYVSIPRLKEFVRTLQA---YVGRN---YG---------G---------------FASGGGYLLSRKSA--LV---IADAPDVGVPEDVGVAELLKNAGFEGDQRPSHSNNLTGHYTPA-----R-MREIH-------N
>GT31-Glt|BAB08517.1|Streptophyta_Viridiplantae Arabidopsis thaliana;-;At5g41460 (Glycosyltransferase) (Transferring glycosyl group transferase (DUF604))
-------------------------------------------------------------------------------LKDVRWFVMGDDDTVFVAENLIRVLRKYDHQMYYIGSL---SE-SHLQNFSYG---------------MAYGGGFAISYPLAVALS---KMQDRPALYGSDDRMQACMAELGFHQYD-VYGNLFGLAHPVAV-----T-LHHL---------
>GT31-Glt|CAA20470.1|Streptophyta_Viridiplantae Arabidopsis thaliana;-;Uncharacterized protein AT4g23490 (Uncharacterized protein F16G20.190)
------------------------------------------------------------------------------------WFVMGDDDTMYYIGSL-----SESHQNIFFS---------------YG---------------MAYGGGFAISYPLAKALS---KMQDRPALYGSDDRMQACMAELGFHQYD-VYGNLFGLAHPVTV-----S-MHHL---------
>GT31-Glt|CAA84707.2|Nematoda_Metazoa Caenorhabditis elegans;C1GLT;Glycoprotein-N-acetylgalactosamine 3-beta-galactosyltransferase 1 (EC 2.4.1.122) (Core 1 O-glycan T-synthase) (Ce-T-synthase) (Core 1 UDP-galactose:N-acetylgalactosamine-alpha-R beta 1,3-galactosyltransferase 1) (Core 1 beta1,3-galactosyltransferase 1) (C1GalT1) (Core 1 beta3-Gal-T1)
VFCWILTGK-QNHDKRAKHVKATWAKRCNKYVFMSSEEDAEL----PAINLN---VS---EGRDWAKTKGAFKYIYDHHLNDYDWFLKADDDTYVVMENLRFMLLAHSPEPIHFGCK---FK-PFTQGG------------------YHSGGGYVLSREALKKFI---EVKSLQNGGAEDAEMGKCLEKVGFMPFV-PEHH------------------------------
>GT31-Glt|CAB04029.2|Nematoda_Metazoa Caenorhabditis elegans;-;Glycoprotein-N-acetylgalactosamine 3-beta-galactosyltransferase 1
IFCFVETSE-RYYNDRVPSIAATWLRRCDNGRFFSKSANMTY----STVYKN---LE---DSFFFRKSIFGFYYSYMHISNSFDWYLKADDDTYFAMDHLREYLNTLDPKPLYLGYV---IK-SGLKNG------------------YNSGGGYILSNAAVEKLY---HDEYGY-DWAEDRGMGRCLARVGFNRFM-P---------------------------------
>GT31-Glt|CAB04490.2|Nematoda_Metazoa Caenorhabditis elegans;-;Glycoprotein-N-acetylgalactosamine 3-beta-galactosyltransferase 1
LFCFVETSA-VHYDDRVPSIASTWLPKCDNGRFFLPNSNMTY----STVYLN---LK---DSYYFRKTTFGFYYSYMHISKSFDWYLKADDDTYFAMDHLKEYLSTLDPKPLYLGYV---LK-PYFKNG------------------YNSGGGYILSNAAVEKLY---HDEYTY-DWAEDRGMGRCMARAGFMPFK-PSELAVGEWHYYPM-----E--------------
>GT31-Glt|CAB10303.1|Streptophyta_Viridiplantae Arabidopsis thaliana;-;Uncharacterized protein AT4g15240 (Uncharacterized protein dl3665c)
----------------------------------------------------------------------------DRGDKDVRWFVFGDDDTVFFVDNLVTVLSKYDHKWFYVGSN---SE-FYDQNVRYS---------------FAFGGGFAISASLAKVLA---KVLDSSHMYGSDSRIFSCVAELGFHQID-VRGNIFGL--------------------------
>GT31-Glt|CAL69739.1|Nematoda_Metazoa Caenorhabditis elegans;-;Glycoprotein-N-acetylgalactosamine 3-beta-galactosyltransferase 1
LFCFVETSE-RYMDERVPSIASTWLRRCDNGRFFSKTPNITY----STVYKN---LE---DSYSFRKSIFGFYYSYVHISKSFDWYLKADDDTYFAMDHLREYLNTLDPKPLYLGYK---N----------G---------------YNSGGGYILSNAAVKLFV---EKS--HDDWAEDHGIGRCLARVGFVPFK-P---------------------------------
>GT31-Glt|CCD68253.1|Nematoda_Metazoa Caenorhabditis elegans;-;Glycoprotein-N-acetylgalactosamine 3-beta-galactosyltransferase 1
ILCLIHTAT-PSHETRAKTILETWVQHCDDFLFFTDSKNDSI----PHIYYP---LL---NSRDWEKIRRVFKYVRDKITKKYDWYYRADDDTYALMHNMRTLLDNYSPKHHYLGLQ---WN-FFTPRG-------------------FNDGSYILSREAFNEVM---LDPDRHHRAEEDQELAKCLAHMEIQHFH-PLEQLTI---------------------------
>GT31-Glt|CCD70241.1|Nematoda_Metazoa Caenorhabditis elegans;-;Glycoprotein-N-acetylgalactosamine 3-beta-galactosyltransferase 1
LLCWAMTTS-IYHKTRVPAITETWLRRCDAGHLFTNSDNAST----PTVFDG---LP---ESYYFWKTRLALLYIYKYVSKDFDWYFKGDDDTYLIVENLQRYLATLDPKPYFIGYR---LS-RRTETG------------------YNAGGGYVMSREAAEKLF---NDKQKYH-EWEDYAIAQCLASVGFLPWR-PEQHFYALTRSFQM-----D-PIQVW--------
>GT31-Glt|CCD71249.1|Nematoda_Metazoa Caenorhabditis elegans;-;Glycoprotein-N-acetylgalactosamine 3-beta-galactosyltransferase 1
--VMVKTFE-GHHVNRLEVLKNTWASDVSRIEYCSDKEDPAI----PTINLG---VD---NTDRCAKTWEIFRRFLGSSGNGAKWLVVADDDTLMNFKRLKQMLELYDSDKIIIGER---YG-YGFGDSGYD---------------YPTGGGMIFTRSAVESLL---AQCPSANTDPDDMTIGICALTAGLHQAR-PLDYAPEIKY--PI-----S-FHK----------
>GT31-Glt|CDP12059.1|Streptophyta_Viridiplantae Coffea canephora;-;Uncharacterized protein
IVFGIAASA-KLWDKRKNYIKLWWGEKMRGIVWLKSREEESD----TLPELR---IS---GTNRHRSAIRISRIVSETLMENVRWFVMGDDDTVFVTENLVRVLNKYDHQYYYIGSL---SE-SHLQNFSYG---------------MAYGGGFAISYPLAKALE---KMQDSPGLYGSDDRMQACMAELGFHQYD-VYGNLFGLAHPVAV-----T-LHHL---------
>GT31-Glt|ENN76570.1|Arthropoda_Metazoa Dendroctonus ponderosae;-;Uncharacterized protein (Fragment)
VLCWIMTGP-NNHEKRARHVKNTWGKRCNILLFMSSKEDASL----PAIALP---VK---EGRKWGKTKRAFEYVYKHYFDKADWFLKADDDTYMILENLRYMLTPYSSESIYFGCR---FK-PYVKQG------------------YMSGGGYVLSKEALRRFV---EIGLRKSDGAEDVELGRCMEAVQFFPFV-PEHHLNASFHYVPN-----Q-MYVLE-------Y
>GT31-Glt|KFU83809.1|Chordata_Metazoa Chaetura pelagica;-;Glycoprotein-N-acetylgalactosamine 3-beta-galactosyltransferase 1-B (Fragment)
VLCWVMTGP-PTLETRARHVRATWAQHCNLVLFMSSAPTQGF----PAVGLP---VG---EGRSYWKTIRALQYVHQHHRDQADWFLKADDDTFVVVANLRWLLAAHSPRPLYLGKR---FR-PFARQG------------------YMSGGGYVLSREALQRFVGA-VASGTHTSAVEDVALGQCLEKLGFHPFP-PETHLPSLFHYVPA-----Q-MYELE-------Y
>GT31-Glt|NP_001094800.1|Chordata_Metazoa Homo sapiens;C1C1L;C1GALT1-specific chaperone 1-like protein
--------------------KETWTKHCDKAELYDTKNDNLF---------N---IE---SNDRQMRT--AYKYVFEKYGDNYNWFFLALPTTFAVIENLKYLLFTRDAQPFYLGHT--------VIFGDLE---------------YVTVEGIVLSRERLNRLL---DNSETDQSVIEDKQLAICLKYAG----------------------------------------
>GT31-Glt|XP_001393473.2|Ascomycota_Fungi Aspergillus niger CBS 513.88;-;hypothetical protein ANI_1_1094084
--------------------------RANTSDFYDALQRGDD----KTVAA-----P---QGWRRFKFLPMVERAHE-INPSADWFVFLESDTYVVWDNMFRLLDQFDPTPLYMGSP---SG-RRINEKEVS---------------YFAGGGFVLSTAAVDKLVSREEQYEDKADCCGDSILGWALHEKGFNPH--PLHGIDDYWCQPVI-----S-MHK----------
>GT31-Glt|XP_003084265.1|Chlorophyta_Viridiplantae Ostreococcus tauri;-;Unnamed product
VACWILNTP-RDL-ARGDAIRRGWGKTCAHLEFI----DRDT----PGIRVD---WT---ETYDSAKSWRAWTFMYEKYANRVDFVLKADTDTYVHGAHLLRYLNRFDALPHYIGRQ---F----VERG--V---------------AFVAGTIVLSREALRLVT---VASRATATKAEDVALALCLRDVG----------------------------------------
>GT31-Glt|XP_008618636.1|Stramenopiles_Protista Saprolegnia diclina;-;Uncharacterized protein
ILCWVNTYE-KNH-ARAASIKATWGRRCDKVVFMSNVYDPAI----PTVRVV---AP---PTHLWQKHRDIVRILWREYGDTYDWIFKCDDDTYVLVDNLRTFLAPYDARPHLLGHRMTLFE-WFHSQGGLY---------------YTPGGGYAFSAPYLKLLV---ESLDECLIVPDDWAISFCMRYHGFHQYS-PERHDEDFDHSVYT-----S-IYQEN-------N
>GT31-Chsy|AAA50619.1|Nematoda_Metazoa Caenorhabditis elegans;CHSSB;Chondroitin sulfate synthase mig-22 (EC 2.4.1.175) (Abnormal cell migration) (Chondroitin-polymerizing factor) (ChPF) (N-acetylgalactosaminyl-proteoglycan 3-beta-glucuronosyltransferase 1) (EC 2.4.1.226)
----VMAAV-MAESALALSINATLGRHVP-RVHLF----ADS----SRIDND---LAQLTNLSPGQKTHSMVLGLLFNMTNNYDWFLLAKDSTYINPFVLLRMIDTMNWEPVVMGE--------------AAEDGSG----------RCRLDGMLLSQPAMHALMN--NRNACALAADDDLAFEKCIQIATNLTCK-PLHQGV----------------------------
>GT31-Chsy|AAF48225.2|Arthropoda_Metazoa Drosophila melanogaster;-;Hexosyltransferase (EC 2.4.1.-)
LFIGVMTSQ-EHINTFATAFNRTTA-HLVNKIKFFIY--ADS----VKTNYK---LKNIVGFTDRRP-FHVVKYIADNYLDEYDYFLLVPDTVYVDARKLVKLLYHMSIFDLYMGGARIGLD--PSGGGASADGQSN----------YCSLEGILLSSSVIRKMRN--NLERCGSTSDHSVNIGRCVKYASRVGCQ-ESFQGMRTVYPVQTPEDFYR-LH-AYKHHLEK--
>GT31-Chsy|AAH21223.2|Chordata_Metazoa Homo sapiens;CHSS2;Chondroitin sulfate synthase 2 (EC 2.4.1.175) (EC 2.4.1.226) (Chondroitin glucuronyltransferase 2) (Chondroitin-polymerizing factor) (ChPF) (Glucuronosyl-N-acetylgalactosaminyl-proteoglycan 4-beta-N-acetylgalactosaminyltransferase II) (N-acetylgalactosaminyl-proteoglycan 3-beta-glucuronosyltransferase II) (N-acetylgalactosaminyltransferase 2)
LLVAVLTSQ-TTLPTLGVAVNRTLGHRLE-RVVFLTGARGRR----APPGMA---VVTL-----ERPIHLALRHLLEQHGDDFDWFFLVPDTTYTEAHGLARLTGHLSLSAAHLY---LGRP--QDF--IGGEPTPR----------YCHGGGVLLSRMLLQQLRP--HLEGCIVSARPDEWLGRCILDATGVGCT-GDHEGVHTAHPVRDPVHMYQ-LH-KARAELERT-
>GT31-Chsy|AAO85274.1|Nematoda_Metazoa Caenorhabditis elegans;CHSSA;Chondroitin sulfate synthase sqv-5 (EC 2.4.1.174) (EC 2.4.1.175) (EC 2.4.1.226) (Glucuronosyl-N-acetylgalactosaminyl-proteoglycan 4-beta-N- acetylgalactosaminyltransferase 1) (Glucuronylgalactosylproteoglycan 4-beta-N- acetylgalactosaminyltransferase) (N-acetylgalactosaminyl-proteoglycan 3-beta-glucuronosyltransferase 1) (Squashed vulva protein 5)
ILVAIMTAA-KYVDTRAYNVWKTWAQHIPGRVLIFVAEGTES----VHEDMP---LIRLKGVDDQKKSFAMVKWLAENMADEYDWFLRADDDLYIRGEELALFLRSVDSKAHIIGQAGLGNS--AEYGLLALGSTDN----------YCMGGGIVMSRDTLLKVSP--HLESCMLTSHEDVELGRCIRKHVGVACT-WNYEMQKTLHPIKDPAVMRK-VH-LREIKLREAA
>GT31-Chsy|AAO85275.1|Arthropoda_Metazoa Drosophila melanogaster;-;Hexosyltransferase (EC 2.4.1.-)
VFVGVMTAK-SFLEGRARAVYDTWGKEVPGRMAFFSSEGS------YSDDLP---VVGLKNVDDQKKSFMMLYYMYEHYIDRFEWFIRADDDVYMEPDKLERFLRSIDSKPQFIGQAGKGNS--EEFGLLSLEFDEN----------FCMGGGVILSSETLRRVAP--HIPSCLYSTHEDVEVGRCVQKFAGIPCT-WNYEMQYTLHPIKQAPLMYR-LH-SYGLKAEEM-
>GT31-Chsy|AAQ88893.1|Chordata_Metazoa Homo sapiens;CHSS1;Chondroitin sulfate synthase 1 (EC 2.4.1.175) (EC 2.4.1.226) (Chondroitin glucuronyltransferase 1) (Chondroitin synthase 1) (ChSy-1) (Glucuronosyl-N-acetylgalactosaminyl-proteoglycan 4-beta-N-acetylgalactosaminyltransferase 1) (N-acetylgalactosaminyl-proteoglycan 3-beta-glucuronosyltransferase 1) (N-acetylgalactosaminyltransferase 1)
LFVGVMTAQ-KYLQTRAVAAYRTWSKTIPGKVQFFSSEGSDT-----SVPIP---VVPLRGVDDQKKSFMMLKYMHDHYLDKYEWFMRADDDVYIKGDRLENFLRSLNSEPLFLGQTGLGTT--EEMGKLALEPGEN----------FCMGGGVIMSREVLRRMVP--HIGKCMYTTHEDVEVGRCVRRFAGVQCV-WSYEMRQTLHPNKNPPYQYR-LHSLRTIQLHREV
>GT31-Chsy|BAC98832.1|Chordata_Metazoa Homo sapiens;CHSS3;Chondroitin sulfate synthase 3 (EC 2.4.1.175) (EC 2.4.1.226) (Carbohydrate synthase 2) (Chondroitin glucuronyltransferase 3) (Chondroitin synthase 2) (ChSy-2) (Glucuronosyl-N-acetylgalactosaminyl-proteoglycan 4-beta-N-acetylgalactosaminyltransferase II) (N-acetylgalactosaminyl-proteoglycan 3-beta-glucuronosyltransferase 3) (N-acetylgalactosaminyltransferase 3)
LYVGVMTAQ-KYLGSRALAAQRTWARFIPGRVEFFSSQNAGQ----PPPPLP---VIALPGVDDQKKSFMMIKYMHDHYLDKYEWFMRADDDVYIKGDKLEEFLRSLNSKPLYLGQTGLGNI--EELGKLGLEPGEN----------FCMGGGMIFSREVLRRMVP--HIGECMHTTHEDVEVGRCVRRFGRAQCV-WSFQMQQTLHPNKRPAYQYR-LHNLRTIQLHREA
>GT31-Chsy|CBY14086.1|Chordata_Metazoa Oikopleura dioica;-;Hexosyltransferase (EC 2.4.1.-)
LVSSMITSK-DTVSSLAIAQNKTLGHHMQKLLFFFGSHGKNH----QPAGMN---IVVHPEEDE-RILYQTLYYLYQHYNEVYDWFFVGYDNSYVAGYRVNEIVNHMSIRKLYLGLPARIHD--EKIDGY-----------------YCKQSGFIMSRALMMAVMP--EMNKCIQADSPDEWLGRCLLTKGEVGCV-NTEEVQTSAFPVATTTEVYK-LH-KREVEIDMT-
>GT31-Chsy|EDP47845.1|Ascomycota_Fungi Neosartorya fumigata;-;Uncharacterized protein
------------------NVNETIKRTSPDFDLYNIHEHGRS----GLTPAD---LSRVPNTAFN-PGWKLDKWKFLPMIDETKWYVFMEADTYYIWSNLLQWLAQLDPKPYY-----LGNP--TQIG------SDI----------FGHGGGFILSREAMRRASD--LRAKDWDRYTGEQWAGDCVLHDAGVPLL-WSWPMLQ---------------------------
>GT31-Chsy|KFB37145.1|Arthropoda_Metazoa Anopheles sinensis;-;Hexosyltransferase (EC 2.4.1.-)
LFVGVLTAE-ENVESLATAINRTTA-HLVNKMKFFIN--ADN----VKSNFR---LKNIVGFTDLRP-FHMLKYLADNYLDEYDYFLLLTDTTYVNARTLRSQLEHLSVMDVYMGTLGDGSG--GSDGG-GARDDRQ----------YCDLHGIVLSSGVIRKIRA--NLDWCCASNNHNINIGKCVTYSTKIACQ-SSWQGASTVYPVTSADDFYL-LH-AYRVHLER--
>GT31-Chsy|NP_061888.1|Chordata_Metazoa Homo sapiens;CHPF2;Chondroitin sulfate glucuronyltransferase (EC 2.4.1.226) (CSGlcA-T) (Chondroitin glucuronyltransferase) (Chondroitin polymerizing factor 2) (ChPF-2) (Chondroitin synthase 3) (ChSy-3) (N-acetylgalactosaminyl-proteoglycan 3-beta-glucuronosyltransferase)
LLVAVLTSR-ATLSTLAVAVNRTVAHHFP-RLLYFTGQRGAR----APAGMQ---VV-------ERPAWLMLRHLHTHFGADYDWFFIMQDDTYVQAPRLAALAGHLSIQDLYLGRA-------EEF--IGAGEQAR----------YCHGGGYLLSRSLLLRLRP--HLDGCILSARPDEWLGRCLIDSLGVGCV-SQHQGQQAVHPVSEGTLMYR-LH-KRALELERAS
>GT31-Chsy|WP_051294406.1|Proteobacteria_Bacteria Gemmobacter nectariphilus;-;hypothetical protein
LLVVVFSCR-PYLETRIPTLRSGWAHGIPYVVVVGGASPAEA----GTRQGD---VVFLDAPDDPQKTLAMIRWVHDH--TPFARVMKIDDDCFVDVETLFASLQHLKF---YLGRKAASPR--GRMELDKSPEPSS----------YADGGGYVLSRATALDMAD--SPEGQRLSFMEDKMLG-----------------------------------------------
>GT31-Chsy|XP_001747715.1|Salpingoecidae_Choanoflagellida Monosiga brevicollis;-;Predicted protein
LLIGVLTDP-SSLDTIAQAVHDTWASDIESNVIFFVGSCAIN----ISTNFNGR-LVCLN-TPDQRKVFLLWRYMYTHMAHRYQWFMKLDHDAYINVDRMSAMVALISTLDLYMGVPAAGRK--EERQQLGL-DGHK----------YCL-GGYIVNAPILETLTR--YGDDCVRSNHSDTEIGRCIFGHMGTECP-SSFQFKQVVHPLKRAEDFVR-FH-HQT-------
>GT31-Chsy|XP_007905570.1|Chordata_Metazoa Callorhinchus milii;-;PREDICTED: chondroitin sulfate synthase 1
LYVGVMSAQ-KYLENRAVAAHQTWAQDIPGTVEFFSSEGSDP-----SLPIP---LIALPGVDDQKKSFMMLKYMHDHYLDRYEWFMRADDDVYIRSDKLEAFLRTLNSQPLYLGQTGLGTS--DELGKLALEPGEN----------FCMGGGVIMSREVLRRMVP--HIGECMYTTHEDVEVGRCVRRFAGVQCV-WSYEMQQTLHPNKNPAYQYR-LHSLRTVQLHREV
>GT31-Chsy|XP_013785259.1|Arthropoda_Metazoa Limulus polyphemus;-;PREDICTED: LOW QUALITY PROTEIN: chondroitin sulfate synthase 1-like
LFVGVMTAE-KFLDSRAVAVYETWGKTIPGKIVFFSSSNSKA-----SSQLP---LVTLPGVDDQKKSFLMLKYMHDHFLDKFEWFMRADDDVYVRTDKLEKFLRSINSKAQFIGQAGLGNK--EEFGQLSLDDGEN----------FCMGGGMLMSRETLRLLAP--HIRYCLYSTHEDVEVGRCIRRFVGIPCT-WSYEMQNTLHPIKQPAYLYR-LHSLRTLLLHRD-
>GT31-Fringe|AAA64525.1|Arthropoda_Metazoa Drosophila melanogaster;FNG;Fringe glycosyltransferase (EC 2.4.1.222) (O-fucosylpeptide 3-beta-N-acetylglucosaminyltransferase)
IFISVKTTK-NYHDTRLALIIKTWFQLARDQTWFFTDTDDHY----YQEKTKGH-LINTKCSQGKALCCKMSAELDVFLESGKKWFCHFDDDNYVNVPRLVKLLDEYSPVDWYLGKPSISSPLLDSKNTTTKKITFW----------FATGGGFCLSRALTLKML---PIAGGKIRFPDDVTMGFIIEHLLKVPLTVVDNF-HS--HLEPMRQDTFQDQVSFSQWNVIKVT
>GT31-Fringe|AAC51358.1|Chordata_Metazoa Homo sapiens;MFNG;Beta-1,3-N-acetylglucosaminyltransferase manic fringe (EC 2.4.1.222) (O-fucosylpeptide 3-beta-N-acetylglucosaminyltransferase)
VFIAVKTTR-AFHRLRLELLLDTWVSRTRELTFVFTDSPDKG----LQERLGSH-LVVTNCSAEPALSCKMAAEFDTFLASGLRWFCHVDDDNYVNPRALLQLLRAFPLRDVYVGRPSLNRPIEPQPHNRTRLVQFW----------FATGGGFCINRKLALKMA---PWASGLIRLPDDCTMGYIIECKLGGRLQPSPLF-HS--HLETLRTAQLPEQVTLSKLNVIKLE
>GT31-Fringe|EYE95772.1|Ascomycota_Fungi Aspergillus ruber CBS 135680;-;Family 31 glycosyltransferase
------------------------------------DADLEA----YQALKQGN-TTAVNSQQGDRMKFLPMVERAYDVNPTAKWYVFLESDTYYVWDNLFRLLDQYNPVPLYFGSPSPGKP--------TAEETTW----------FAYGGGFIISAAAMQKLV---IRKTGSAQYEDDTVIGWALYEK-GVKLSGLPMF-NA--H------------------------
>GT31-Fringe|KOO29106.1|Haptophyceae_Protista Chrysochromulina sp. CCMP291;-;Beta-1,3-N-acetylglucosaminyltransferase lunatic fringe
VVVGIMTCR-RFHRTRCRAQLDTWLRRAR-RVVFFTDTAEEG----TSAELRAP-VIAHTFKPSRIFSAPAQARFAARHEPLPKWIYMADDDSYAFTPTMLATLAKYNPQPHYLG-----YAFPHLEGVIPGKRQPL----------FANGGGICVSRGALVAAL---P--------------------------------------------------------------
>GT31-Fringe|NP_002908.1|Chordata_Metazoa Homo sapiens;RFNG;Beta-1,3-N-acetylglucosaminyltransferase radical fringe (EC 2.4.1.222) (O-fucosylpeptide 3-beta-N-acetylglucosaminyltransferase)
VFIAVKTTR-KNHGPRLRLLLRTWISRARQQTFIFTDGDDPE----LELQGGDR-VINTNCSAVQALCCKMSVEYDKFIESGRKWFCHVDDDNYVNARSLLHLLSSFSPQDVYLGRPSLDHPIERVQGGRTTTVKFW----------FATGGGFCLSRGLALKMS---PWASLQVRLPDDCTVGYIVEGLLGARLLHSPLF-HS--HLENLPPDTLLQQVTLSPHNVVNVQ
>GT31-Fringe|NP_001035257.1|Chordata_Metazoa Homo sapiens;LFNG;Beta-1,3-N-acetylglucosaminyltransferase lunatic fringe (EC 2.4.1.222) (O-fucosylpeptide 3-beta-N-acetylglucosaminyltransferase)
VFIAVKTTK-KFHRARLDLLLETWISRHKEMTFIFTDGEDEA----LARHTG-N-VVITNCSAAQALSCKMAVEYDRFIESGRKWFCHVDDDNYVNLRALLRLLASYPHRDVYVGKPSLDRPIERVSENKVRPVHFW----------FATGGGFCISRGLALKMS---PWASGRIRLPDDCTIGYIVEALLGVPLIRSGLF-HS--HLENLPTSELHEQVTLSKRNAVHV-
>GT31-Fringe|XP_001521629.1|Chordata_Metazoa Ornithorhynchus anatinus;-;MFNG O-fucosylpeptide 3-beta-N-acetylglucosaminyltransferase
VFVAVKTTR-RFHQSRLELLLDTWISRTRKQTYIFTDGEDEA----LQERLGAH-FVVTNCPAEPALSCKMAAEFDAFMASGLSWFCHLDDDNYLNPRALLKLLSSYSPWDVYVGKPSLNRPIEPLPQNRTKLVRFW----------FATGGGFCINRRLATKMV---PWASGLIRLPDDCTVGYIVECKLGGRLLPSPLF-HS--HLENLRTPQLPQQVTLSKLNVIEIE
>GT31-Fringe|XP_002422797.1|Arthropoda_Metazoa Pediculus humanus subsp. corporis;-;Fringe glycosyltransferase, putative (EC 2.4.1.222)
IFISVKTTR-NYHKWRLPVILKTWFQLAKNQTWFFTDTDDFE----FQKKTDGH-MINTNCSSSKALCCKMSVEFDVFLESNKKWFCHFDDDNYVNVPRLVTILRNYNSQDWYLGKPSIRAPL--TKDVNSRKISFW----------FATGGGFCLSRALALKMM---PVASGKIRLPDDVTMGYIIEHLLRKHLTVVEQF-HS--HLEPMRRNSLQDQISFSDLNVVKI-
>GT31-Galt-Gnt|AAD23451.1|Chordata_Metazoa Homo sapiens;B3GT1;Beta-1,3-galactosyltransferase 1 (Beta-1,3-GalTase 1) (Beta3Gal-T1) (Beta3GalT1) (EC 2.4.1.86) (UDP-galactose:beta-N-acetyl-glucosamine-beta-1,3-galactosyltransferase 1)
LVILISTTH-KEF-DARQAIRETWGDENNFKGIKIATLFLLGKNA-DP-------VLNQMVEQETLKTLMGMRWVAT-FCSKAKYVMKTDSDIFVNMDNLIYKLPSTKPRRYFTGYVI-NGGPIRDVRSKWYMPRDLYPDSNYP---PFCSGGYIFSADVAELIY---KTSLHRLLHLEDVYVGLCLRKLGPFQN--SGF----TVHQIPE-----E-MHRIW--------
>GT31-Galt-Gnt|AAF45918.1|Arthropoda_Metazoa Drosophila melanogaster;BRN;Beta-1,3-galactosyltransferase brn (EC 2.4.1.62) (Brainiac protein) (Neurogenic secreted-signaling protein brn)
LTMLIKSAV-GNS-RRREAIRRTWGYEGRFSDVHLRRVFLLGT----------AEDSEKDVAWETLKTMLGMRWASD-QFNRSEFYLFVDDDYYVSAKNVLKFLQSHQPL-LFAGHVFQTS-PLRHKFSKWYVSLEEYPFDRWP---PYVTAAFILSQKALRQLY---AASVHPLFRFDDVYLGIVALKAGLQHC--DDFRFHRASHEFPE-----E-MTRVW--------
>GT31-Galt-Gnt|AAF47918.1|Arthropoda_Metazoa Drosophila melanogaster;-;Hexosyltransferase (EC 2.4.1.-)
-LILVHSAV-RNI-EKRRIIRETWANRSYIDQTPLKVYFLVGGVS------AKSEKWQQFLGRETYKHVMALKWFNE-KCAHAQLLVKVDDDVFMNTPQLVKYLATPSRPNLMLCRSVHHSRVKRSYRSKWRVTYKEYPNRFYP---EYCPGAIVYAPEVVRRLY---EAAQKKYFWVDDVITGILAEETGPLQH--YLEQKDVTNHAIPD-----E-SMTIW--------
>GT31-Galt-Gnt|AAF52604.2|Arthropoda_Metazoa Drosophila melanogaster;-;Hexosyltransferase (EC 2.4.1.-)
LLVLITSSL-RHS-AARMSIRQTWGSRRDVG-----MAFVLGKGK-NKS-VKKAIDQEDFM---TLKTISLLEWADL-HCPKAKYVLKTDDDMFINVPKLLT-LISTLKNRTIYGRRAENWKPIRNRWSKYHISNAQYGKPTFP---YFTTGAYLLTGDIVHALY---VQSLNAFLKLEDVFT------TGAES---LNIRRVNTIHMVNN-----E-QFTLW--------
>GT31-Galt-Gnt|AAF52606.2|Arthropoda_Metazoa Drosophila melanogaster;-;LD29807p
LLVLISSAM-SHD-AARMSIRQTWGTRRDVG-----MAFVLGRGT-NET-------INKALTQETLKTISTLEWADV-HCPKAKYILKTDDDMFINVPKLLTFL-DKHKKRTIYGRLAKKWKPIRNKKSKYYVSVDQFAAGVFP---SFTTGAYVLTGDIVHELY---VRSLKVYLKLEDVFT------TGAKSL--NVKRVQASVHMISN-----E-QFDLW-------K
>GT31-Galt-Gnt|AAF66442.1|Chordata_Metazoa Homo sapiens;B3GL1;UDP-GalNAc:beta-1,3-N-acetylgalactosaminyltransferase 1 (Beta-1,3-GalNAc-T1) (EC 2.4.1.79) (Beta-1,3-galactosyltransferase 3) (Beta-1,3-GalTase 3) (Beta3Gal-T3) (Beta3GalT3) (b3Gal-T3) (Beta-3-Gx-T3) (Galactosylgalactosylglucosylceramide beta-D-acetyl-galactosaminyltransferase) (Globoside synthase) (UDP-N-acetylgalactosamine:globotriaosylceramide beta-1,3-N-acetylgalactosaminyltransferase)
LVILVTSHP-SDV-KARQAIRVTWGEKKSWWGYEVLTFFLLGQ----EA-EKEDKMLALSLEDETLKTIMAFRWVTE-FCPNAKYVMKTDTDVFINTGNLVKYLLNLNHEKFFTGYPLIDNYSYRGFYQKTHISYQEYPFKVFP---PYCSGGYIMSRDLVPRIY---EMMGHKPIKFEDVYVGICLNL--VNIH--I---PEDAAHGFSK-----E-IITFW--------
>GT31-Galt-Gnt|AAH22507.1|Chordata_Metazoa Homo sapiens;B3GT2;Beta-1,3-galactosyltransferase 2 (Beta-1,3-GalTase 2) (Beta3Gal-T2) (Beta3GalT2) (EC 2.4.1.86) (UDP-galactose:2-acetamido-2-deoxy-D-glucose 3beta-galactosyltransferase 2)
LILLIAAEP-GQI-EARRAIRQTWGNESLAPGIQITRIFLLGLSI-KLN-GY----LQRAILEETIKTLMGMNWVAT-YCPHIPYVMKTDSDMFVNTEYLINKLPDLPPHNYFTGYLMRGYAPNRNKDSKWYMPPDLYPSERYP---VFCSGGYVFSGDLAEKIF---KVSLGRRLHLEDVYVGICLAKLRP-------VPPPNTSHQFPS-----E-LIKYW--------
>GT31-Galt-Gnt|AAH30579.1|Chordata_Metazoa Homo sapiens;B3GN2;N-acetyllactosaminide beta-1,3-N-acetylglucosaminyltransferase 2 (EC 2.4.1.149) (Beta-1,3-N-acetylglucosaminyltransferase 1) (BGnT-1) (Beta-1,3-Gn-T1) (Beta3Gn-T1) (Beta-1,3-galactosyltransferase 7) (Beta-1,3-GalTase 7) (Beta3Gal-T7) (Beta3GalT7) (b3Gal-T7) (Beta-3-Gx-T7) (UDP-Gal:beta-GlcNAc beta-1,3-galactosyltransferase 7) (UDP-GlcNAc:betaGal beta-1,3-N-acetylglucosaminyltransferase 2) (BGnT-2) (Beta-1,3-Gn-T2) (Beta-1,3-N-acetylglucosaminyltransferase 2) (Beta3Gn-T2) (UDP-galactose:beta-N-acetylglucosamine beta-1,3-galactosyltransferase 7)
LLLAIKSLT-PHF-ARRQAIRESWGQESNAGNQTVVRVFLLGQTP-PED-N--HPDLSDMLKFESLKEVLFLRWVST-SCPDTEFVFKGDDDVFVNTHHILNYLNSKTKKDLFIGDVIHNAGPHRDKKLKYYIPEVV-YSGLYP---PYAGGGFLYSGHLALRLY---HITDQHLYPIDDVYTGMCLQKLGPEKH--KGFRTFDLVHSRPQ-----E-MIDIW-------S
>GT31-Galt-Gnt|AAK00849.1|Chordata_Metazoa Homo sapiens;B3GN3;N-acetyllactosaminide beta-1,3-N-acetylglucosaminyltransferase 3 (EC 2.4.1.149) (Beta-1,3-galactosyl-O-glycosyl-glycoprotein beta-1,3-N-acetylglucosaminyltransferase) (EC 2.4.1.146) (Beta-1,3-galactosyltransferase 8) (Beta-1,3-GalTase 8) (Beta3Gal-T8) (Beta3GalT8) (b3Gal-T8) (Beta-3-Gx-T8) (Core 1 extending beta-1,3-N-acetylglucosaminyltransferase) (Core1-beta3GlcNAcT) (Transmembrane protein 3) (UDP-Gal:beta-GlcNAc beta-1,3-galactosyltransferase 8) (UDP-GlcNAc:betaGal beta-1,3-N-acetylglucosaminyltransferase 3) (BGnT-3) (Beta-1,3-Gn-T3) (Beta-1,3-N-acetylglucosaminyltransferase 3) (Beta3Gn-T3) (UDP-galactose:beta-N-acetylglucosamine beta-1,3-galactosyltransferase 8)
LLLVIKSSP-SNY-VRRELLRRTWGRERKVRGLQLRLLFLVGTAS-NPH-EAR--KVNRLLELETLKQVLFLQWQET-RCANASFVLNGDDDVFAHTDNMVFYLQDHDPRHLFVGQLIQNVGPIRAFWSKYYVPEVVTQNERYP---PYCGGGFLLSRFTAAALR---RAAHVDIFPIDDVFLGMCLELEGPASH--SGIRTSGLVHRFPY-----E-MLLMW-------D
>GT31-Galt-Gnt|AAK32808.1|Streptophyta_Viridiplantae Arabidopsis thaliana;B3GTG;Hydroxyproline O-galactosyltransferase GALT3 (EC 2.4.1.-) (Beta-1,3-galactosyltransferase 16)
LLVGVFSTG-NNF-KRRMALRRSWMQYEAVRSGKVAVRFLIGLHT-NE-------KVNLEMWRESLKTVA-LCILGT-KVIPAKYIMKTDDDAFVRIDELLSSLEER-PSALLYGLISFDSSPDREQGSKWFIPKEEWPLDSYP---PWAHGGYIISHDIAKFVV---KGHRQGLFKLEDVAMGIWIQQFNIKRV--KYI----LVHYQPR-----L-ILCLW-------E
>GT31-Galt-Gnt|AAK72094.1|Nematoda_Metazoa Caenorhabditis elegans;BRE5;Beta-1,3-galactosyltransferase bre-5 (EC 2.4.1.-) (Bacillus thuringiensis toxin-resistant protein 5) (Bt toxin-resistant protein 5)
IIIIIKSSA-KNG-PMRESVRKTWGVFRMIDGVEVMPIFIVGRVE-NME-------IMRRIDVETLKLFGAIDYAANPQCSSPDFTFLVDDDYLVHIPNLVKFAKTKQKELVYEGFVFDTS-PFRLKIHKHSISLNEYPFSRYP---PYVSAAVFLTSETIARFR---NSIRKKMFPFDDVFTGILAKTVNATHN--ENF-------------------------------
>GT31-Galt-Gnt|AAL28774.1|Arthropoda_Metazoa Drosophila melanogaster;-;Hexosyltransferase (EC 2.4.1.-)
--LIVTSYA-GHD-ALRSAHRQAIPQS-KLEEMGLRRVFLLAALP-SRE----HFISQDQLASESYKHVMGLKWVSE-ECKKAKFIIKLDDDIIYDVFHLRRYLETREPSTLLSGYVLDAKPPIRLRANKWYVSKKEYPQALYP---AYLSGLYVTNVPTAERIV---AEAERSFFWIDDTWLGVVRTRLGLERH--NDWFSAN---------------------------
>GT31-Galt-Gnt|AAL91295.1|Streptophyta_Viridiplantae Arabidopsis thaliana;B3GTI;Hydroxyproline O-galactosyltransferase GALT5 (AtGALT5) (EC 2.4.1.-) (Beta-1,3-galactosyltransferase 18)
IFIGILSAG-NHF-SERMAVRKSWMQHVLITSAKVVARFFVALHG-RKE-------VNVELKKEVLKTVAICEHGAL-AFS-AKYIMKCDDDTFVKLGAVINEVKKVPERSLYIGNMNYYHKPLRG--GKWAVTYEEWPEEDYP---PYANGGYVLSSDIARFIK---FERHKRLFKMEDVSVGMWVE------------HFKNTAHYQPR-----Q-MICLW-------D
>GT31-Galt-Gnt|AAM61770.1|Chordata_Metazoa Homo sapiens;B3GN7;UDP-GlcNAc:betaGal beta-1,3-N-acetylglucosaminyltransferase 7 (BGnT-7) (Beta-1,3-Gn-T7) (Beta-1,3-N-acetylglucosaminyltransferase 7) (Beta3Gn-T7) (EC 2.4.1.-)
LLVVVKSVI-TQH-DRREAIRQTWGRERQSAGGAVRTLFLLGTAS-KQE-ERTH--YQQLLAYETLKEIHFLKWLDI-YCPHVPFIFKGDDDVFVNPTNLLEFLADRQPENLFVGDVLQHARPIRRKDNKYYIPGALYGKASYP---PYAGGGFLMAGSLARRLH---HACDTELYPIDDVFLGMCLEVLGPTAH--EGFKTFGVVHKLPP-----E-LLAMW--------
>GT31-Galt-Gnt|AAM68705.2|Arthropoda_Metazoa Drosophila melanogaster;-;Hexosyltransferase (EC 2.4.1.-)
LVIAVCSGL-DHF-EQRSAIRQTWGNTKSFNTAKIRIVFILGRSK-NDS-KRELDKLFR----ETLKSVMALKHISQ-SCADAAFFLKCDDDTFVNVPNLLHFLNRLNGRGLMYGHKFCNMKTVDDVKSPWYMPYYMFKGAKYP---KYLSGGYLMSIDVVKRLY---AEALTSLVHLEDVFTGICAKKAG-RRH---------TMHPVLH-----S-MLDAW--------
>GT31-Galt-Gnt|AAM68706.2|Arthropoda_Metazoa Drosophila melanogaster;-;Hexosyltransferase (EC 2.4.1.-)
LTIAVCSYV-HHF-ERRRAIRKLWGNFTDFNYSVFVKLHLKGRSG-EGD-SLRARNLASLLEIETIKAVMALKHITQ-SCLNTTFYFKCDDDTFVNVPNILHFLEVTSPKRLMYGRQHCNVPPATNKLNKWYMPSYMFRGGVYP---RYLCGGYLLSIDVVPRLY---KASLGRIVHLEDMFTGLCAEKAGRTNH--PLFRSSYTVHRADN-----V-MWEAW--------
>GT31-Galt-Gnt|AAO41403.1|Arthropoda_Metazoa Drosophila melanogaster;-;Hexosyltransferase (EC 2.4.1.-)
LVIAVCTGV-DNF-IQRHTIRETWGNTTEFNTASVRIVFIVGRQK-DEA-MLGNETLNR-IHIETLKSVMALKHISR-SCFNAVYFLKCDDDTFVNIPNLLNFLLGHDRTYLVTGHQFCNVVPVSEVSSKWYMPSYMYKPESYP---KYLSGGYLMSIDVVQRLF---EASLNTLVYLEDVYTGLCAQKAKRHHH------PLFTQHQLDD-----S-MVSAW--------
>GT31-Galt-Gnt|AAP34405.1|Chordata_Metazoa Homo sapiens;B3GN8;UDP-GlcNAc:betaGal beta-1,3-N-acetylglucosaminyltransferase 8 (BGnT-8) (Beta-1,3-Gn-T8) (Beta-1,3-N-acetylglucosaminyltransferase 8) (Beta3Gn-T8) (EC 2.4.1.-)
LLLAVKSEP-GRF-AERQAVRETWGSP----APGIRLLFLLGSPV-GE----AGPDLDSLVAWETLKDLLLLAWLGR-HCPTVSFVLRAQDDAFVHTPALLAHLRALPPRSLYLGEVFTQAMPLRKPGGPFYVPESFFEGG-YP---AYASGGYVIAGRLAPWLL---RAAARAPFPFEDVYTGLCIRALGPQAH--PGFLTAWLVRPLPQ-----A-SIRLW-------K
>GT31-Galt-Gnt|AAQ88849.1|Chordata_Metazoa Homo sapiens;B3GN9;UDP-GlcNAc:betaGal beta-1,3-N-acetylglucosaminyltransferase 9 (BGnT-9) (Beta-1,3-Gn-T9) (Beta-1,3-N-acetylglucosaminyltransferase 9) (Beta3Gn-T9) (EC 2.4.1.-)
LLIAVKSVA-EDF-ERRQAVRQTWGAEGRVQGALVRRVFLLGVPR-GAG-SGGADEVGELLRAETLKEIHFLAWASA-FCPDVRFVFKGDADVFVNVGNLLEFLAPRDPQDLLAGDVIVHARPIRTRASKYYIPEAVYGLPAYP---AYAGGGFVLSGATLHRLA---GACAQELFPIDDVFLGMCLQRLRPEPH--PAFRTFGVVHGLAA-----D-IWLMW--------
>GT31-Galt-Gnt|AAS21306.1|Nematoda_Metazoa Caenorhabditis elegans;BRE2;Beta-1,3-galactosyltransferase bre-2 (EC 2.4.1.-) (Bacillus thuringiensis toxin-resistant protein 2) (Bt toxin-resistant protein 2)
ILMIVSSNC-DNF-ARRNILRKTWMNPENIGDGRMKALFLVGING-AD------EKLNAVVLEESYKTISLLLYSIS-KTKSPNLIGKIDEDVLFYPDQLTPLINDKTITSTFSGEKYEAAVNHGEDNAKWQISKNSFKCSVYP---SYLSGTYFLTRKAAKRIV---EATKHKFISVDDVF-------------------------------------------------
>GT31-Galt-Gnt|ABR58857.1|Streptophyta_Viridiplantae Arabidopsis thaliana;B3GTK;Hydroxyproline O-galactosyltransferase GALT2 (AtGALT2) (EC 2.4.1.-) (Beta-1,3-galactosyltransferase 20)
LFMGVLSAT-NHF-SERMAVRKTWMQHPSIKSSDVVARFFVALNP-RKE-------VNAMLKKEVLKTIAICEFGVQ-NVT-APYIMKCDDDTFIRVESILKQIDGVSPKSLYMGNLNLRHRPLRT--GKWTVTWEEWPEAVYP---PYANGGYIISSNIAKYIQ---NSRHKRLFKMEDVSMGLWVEQFN-------------TAHYQPS-----Q-MMCLW-------D
>GT31-Galt-Gnt|ABR58858.1|Streptophyta_Viridiplantae Arabidopsis thaliana;B3GTF;Beta-1,3-galactosyltransferase GALT1 (EC 2.4.1.-) (Beta-1,3-galactosyltransferase 15) (Galactosyltransferase 1)
LVIGVFSTA-NNF-KRRMAVRRTWMQYDDVRSGRVAVRFFVGLH--------KSPLVNLELWNESWKTLAICIF-GT-EVDSAKFIMKTDDDAFVRVDEVLLSLSMTNNRGLIYGLINSDSQPIRNPDSKWYISYEEWPEEKYP---PWAHGGYIVSRDIAESVG---KKEGNKMFKLEDVAMGIWLTKHGPHYE--NDGRIISVAHYQPA-----E-MTCLW--------
>GT31-Galt-Gnt|ADD13549.1|Nematoda_Metazoa Caenorhabditis elegans;-;Hexosyltransferase (EC 2.4.1.-)
-LVLVTTIA-SEF-EMRNQVRKSWA---NYTSNAVRVKFLMGIP---------ADKQLPLIQKEASKTMAMLIYKTR-YYPDTKCLVKADVDNVLILRNYERLCEEAVALILGKCDVSRTVLRNTTKWA---VPEFVYSEPVYP---TYCSTTYVLAGKTVQSLI---KEAMSPFLSEDVIFTGILAEKAGRRHI--NGLSFFE---------------------------
>GT31-Galt-Gnt|BAA77664.1|Chordata_Metazoa Homo sapiens;B3GT5;Beta-1,3-galactosyltransferase 5 (Beta-1,3-GalTase 5) (Beta3Gal-T5) (Beta3GalT5) (b3Gal-T5) (EC 2.4.1.-) (Beta-3-Gx-T5) (UDP-Gal:beta-GlcNAc beta-1,3-galactosyltransferase 5) (UDP-galactose:beta-N-acetylglucosamine beta-1,3-galactosyltransferase 5)
LVLLVTSSH-KQL-AERMAIRQTWGKERMVKGKQLKTFFLLGTTS-SAA-ETKE------VDQETLKTMMGIEWVHR-FCPQAAFVMKTDSDMFINVDYLTELLLKKNRTRFFTGFLKLNEFPIRQPFSKWFVSKSEYPWDRYP---PFCSGGYVFSGDVASQVY---NVSKSPYIKLEDVFVGLCLERLNLEEL--HSQPTF-ACHFIPR-----T-LLDYW--------
>GT31-Galt-Gnt|BAA97209.1|Streptophyta_Viridiplantae Arabidopsis thaliana;B3GTJ;Hydroxyproline O-galactosyltransferase GALT6 (EC 2.4.1.-) (Beta-1,3-galactosyltransferase 19)
MFIGILSAG-NHF-AERMAVRRSWMQHKLVKSSKVVARFFVALHS-RKE-------VNVELKKEVLKTVAICEYGVN-QLA-AKFIMKCDDDTFVQVDAVLSEAKKTPTRSLYIGNINYYHKPLRQ--GKWSVTYEEWPEEDYP---PYANGGYILSNDISRFIE---FEKHKRMFKMEDVSVGMWVEQF----N--NGTKPVDTAHYQPR-----Q-MICLW-------D
>GT31-Galt-Gnt|BAB21532.1|Chordata_Metazoa Homo sapiens;B3GN4;N-acetyllactosaminide beta-1,3-N-acetylglucosaminyltransferase 4 (EC 2.4.1.149) (UDP-GlcNAc:betaGal beta-1,3-N-acetylglucosaminyltransferase 4) (BGnT-4) (Beta-1,3-Gn-T4) (Beta-1,3-N-acetylglucosaminyltransferase 4) (Beta3Gn-T4)
LLLAIKSQP-GHV-ERRAAIRSTWGRVGGARGRQLKLVFLLGVAG-SAP-PAQ------LLAYETLKELHLQRWVVA-ACPQAHFMLKGDDDVFVHVPNVLEFLDGWDPQDLLVGDVIRQALPNRNTKVKYFIPPSMYRATHYP---PYAGGGYVMSRATVRRLQ---AIMEDELFPIDDVFVGMCLRRLGPMHH--AGFKTFGLVHRLPL-----E-MWTMW--------
>GT31-Galt-Gnt|BAB40940.1|Chordata_Metazoa Homo sapiens;B3GN5;Lactosylceramide 1,3-N-acetyl-beta-D-glucosaminyltransferase (EC 2.4.1.206) (Lactotriaosylceramide synthase) (Lc(3)Cer synthase) (Lc3 synthase) (UDP-GlcNAc:beta-Gal beta-1,3-N-acetylglucosaminyltransferase 5) (BGnT-5) (Beta-1,3-Gn-T5) (Beta-1,3-N-acetylglucosaminyltransferase 5) (Beta3Gn-T5)
LLLFVKTAP-ENY-DRRSGIRRTWGNENYVRNANIKTLFALGTPN-P----LEGEELQRKLAWETLKLLMQFSWANT-YCPHAKFLMTADDDIFIHMPNLIEYLQSLEQQDFWIGRVHRGAPPIRDKSSKYYVSYEMYQWPAYP---DYTAGAYVISGDVAAKVY---EASQTNLY-IDDVFMGLCANKIGPQDH---------TSHGH-E-----D-LQDLW-------K
>GT31-Galt-Gnt|BAB88882.1|Chordata_Metazoa Homo sapiens;B3GN6;Acetylgalactosaminyl-O-glycosyl-glycoprotein beta-1,3-N-acetylglucosaminyltransferase (EC 2.4.1.147) (Core 3 synthase) (UDP-GlcNAc:betaGal beta-1,3-N-acetylglucosaminyltransferase 6) (BGnT-6) (Beta-1,3-Gn-T6) (Beta-1,3-N-acetylglucosaminyltransferase 6) (Beta3Gn-T6)
LLLAVKSAP-EHY-ERRELIRRTWGQERSYGGRPVRRLFLLGTPG-PED-EARAERLAELVALETLKHLHLLDWLAA-RCPHARFLLSGDDDVFVHTANVVRFLQAQPPRHLFSGQLMEGSVPIRDSWSKYFVPPQLFPGSAYP---VYCSGGFLLSGPTARALR---AAARHPLFPIDDAYMGMCLERAGPSGH--EGIRPFGLVHRFPY-----E-MLLMW-------K
>GT31-Galt-Gnt|BAC42872.1|Streptophyta_Viridiplantae Arabidopsis thaliana;B3GTH;Hydroxyproline O-galactosyltransferase GALT4 (EC 2.4.1.-) (Beta-1,3-galactosyltransferase 17)
LFIGILSAG-NHF-AERMAVRKSWMQQKLVRSSKVAARFFVAL-------HARKE-VNVDLKKEVLKTVAICEYGVN-TVA-AKYVMKCDDDTFVRVDAVIQEAEKVKGESLYIGNINFNHKPLRT--GKWAVTFEEWPEEYYP---PYANGGYILSYDVAKFIV---DEQKRRLFKMEDVSMGMWVEK-------------FNTAHYQPR-----Q-MICMW-------D
>GT31-Galt-Gnt|CAA15838.2|Nematoda_Metazoa Caenorhabditis elegans;-;Hexosyltransferase (EC 2.4.1.-)
ILMMVASRT-DSF-ARRNVLRKTWMNKNYVRDGRMKALFLVGMVS-EDY-RVR-----RIVMEEPFKSLSLLLYAVS-KAPEFKVIGKIDEDVMFFPDKLIPLLDGKDPAAAFYGQLLKEGEPIKKKDAHWYVPDYAYNCTGYP---AYVAGFYLATRKAAKLVL---KFTKFNFMTVEDLITGILANDLG----------------------------------------
>GT31-Galt-Gnt|CAA15839.1|Nematoda_Metazoa Caenorhabditis elegans;-;Hexosyltransferase (EC 2.4.1.-)
ILMIVASRT-DSY-ARRNIMRQTWMNKSNVANGRMKSLFLVGLAP-ADY------KVKKMVMQEIYKSLMIFLFGVS-KAPQYKIIGKIDEDIMFFPDKMALYEQGIIDTPVSLYGLVIPAGRFRDKTNRWYVPESAYSCSQYP---AYLSGYYMATREAAQMLL---KSTKHDFIQVEDVLLGILAEDLG----------------------------------------
>GT31-Galt-Gnt|CAA15841.1|Nematoda_Metazoa Caenorhabditis elegans;-;Hexosyltransferase (EC 2.4.1.-)
ILMLVVSKT-KNF-ARRNVLRSTWMNKENMKSGRMHALFFVGLVP-GDQ-N-----LKKLVLEEPFKTLALLLYGTS-KASQFKIIGKIDDDVMFFPDQLLPMLDRNFVSNTLSGHLTAEELVLRNKTEPWYVPETAYNCTVYP---VYVMGIYLVTKDAASLIL---DNANHQFMTVEDAITGIIAQKLG----------------------------------------
>GT31-Galt-Gnt|CAA75345.1|Chordata_Metazoa Homo sapiens;B3GT4;Beta-1,3-galactosyltransferase 4 (Beta-1,3-GalTase 4) (Beta3Gal-T4) (Beta3GalT4) (GalT4) (b3Gal-T4) (EC 2.4.1.62) (Gal-T2) (Ganglioside galactosyltransferase) (UDP-galactose:beta-N-acetyl-galactosamine-beta-1,3-galactosyltransferase)
LLILVCTAP-ENL-NQRNAIRASWGGLREARGLRVQTLFLLGEPN-AQH-PVWGSQGSDLAS-ETLKTLSGLNWAEK-HCPMARYVLKTDDDVYVNVPELVSELRSTEPRELYLGRVHWRVNPSRTPGGRHRVSEEQWPHGPFP---PYASGGYVLSASAVQLIL---KVASRPLLPLEDVFVGVSARRGGP---------TQCLTHRLPW-----K-MQEAW-------K
>GT31-Galt-Gnt|CAA93493.2|Nematoda_Metazoa Caenorhabditis elegans;-;Hexosyltransferase (EC 2.4.1.-)
-LIIVNSHA-NHT-KYREMQRENFGPAWLNENNAVM-YFIVGTDI-DVD-----------IDDETYKAIFWINEINK-CRHGPKLLLKIDDDVHIDMIGLQFLIKRYSVDDFMACRVISNGQVVRNNTSKWYLSKKDYKFPNLG---TYCQGVYFISGNLLPILH---GNIEKQFLWMDDWY-------------------------------------------------
>GT31-Galt-Gnt|CAB03537.1|Nematoda_Metazoa Caenorhabditis elegans;-;Hexosyltransferase (EC 2.4.1.-)
IILTVMTRV-DAL-ARRNVLRKTWMTQRN----RIKSIFVIGLGG-DVD-Q----KTKELVMSEAFKMLSMLLYGFS-KVPSAKFIGKVDDDVLFYPNVLLSYMDNNTDIH------------------------------------------------------------------------------------------------------------------------
>GT31-Galt-Gnt|CAB04032.1|Nematoda_Metazoa Caenorhabditis elegans;-;Hexosyltransferase (EC 2.4.1.-)
ILMIVASRT-DSY-ARRNIMRQTWMNKSDVANGRMKPLFLVGLTP-GDY------KMKKMVMQETYKSLAILLYGVS-KAPRYQMIGKIDEDVIFFPDKLALYEQGIIDTPLCAGYKIQAGARIRDKNDRWYVPESSYSCSKFP---EYVSGLYMVTWEAAQQII---KSTKYDFIQVEDVFLGILAEDLG----------------------------------------
>GT31-Galt-Gnt|CAB04107.2|Nematoda_Metazoa Caenorhabditis elegans;-;Hexosyltransferase (EC 2.4.1.-)
ILMIVASRT-DSF-ARRNVLRKTWMNPENIKDGRMKALFLVGMT--DGD-DSRMRKV---VMEEPFKSLTTLLYGTS-KASEFKLIGKIDEDIMFFPDKILPLLEQNDPSESIYGMLFAEGGYVRDKEHRWFVPDSTYGCDMFP---PYTGGFYLVTQDAAKKIL---NATKHIFIPIEDALINGILANDCPRIH------------------------------------
>GT31-Galt-Gnt|CAB04109.3|Nematoda_Metazoa Caenorhabditis elegans;-;Hexosyltransferase (EC 2.4.1.-)
ILLIVLSRP-DDF-SRRNVIRHTWMSQEN----EIKYLFLIGLGA-NMD-G----KIKEVVMAESFKTLTLLLFGVS-KVPSAQLIGKIDGDVLFFPNLFLSTIKNENSINVTSGKIAEAGVPIVSNCCKRFLKYISFGCTRYA---FYLAGFYLVTRSAALRLL---EASKHNFHKIED---------------------------------------------------
>GT31-Galt-Gnt|CAB05465.3|Nematoda_Metazoa Caenorhabditis elegans;-;Hexosyltransferase (EC 2.4.1.-)
ILIIVASRT-DSY-ARRNILRQTWMSKANVANGRMKPLFLVGLTP-GEY------KMKKMVMQETYKSLAILLYGVS-KAPRYQMIGKIDEDVMFFPDKLTLYDQGFIDTPLRIYGLKMQSGAFRDKTHRWYVPESSYSCSKFP---EYVSGLYMVTWEAAQQII---KSTKYDFIQVEDVFLGILAEDLG----------------------------------------
>GT31-Galt-Gnt|CAB05616.2|Nematoda_Metazoa Caenorhabditis elegans;-;Hexosyltransferase (EC 2.4.1.-)
ILMIVASRP-GSV-SRRKVLRKTWMNKANIRNGRMQVLFLVGMV-------AGDRDLMKAVKKEPFKVLSLLLYGTN-KASDFKIIGKIDDDVIFFPDRLTPLLDENDSSYSIYGYLSQDELVVRNETKPWYVPETAYNCTKYP---VYALGFYLITNKAANLIV---ENSRFNFMTVEDALIAGII-AEGIQRH--S---------------------------------
>GT31-Galt-Gnt|CAB05807.1|Nematoda_Metazoa Caenorhabditis elegans;-;Hexosyltransferase (EC 2.4.1.-)
ILLIATSRP-DDF-SRRNAIRKTWMNQKT---NQITSFFMVGLSS-KTD-E----KVRDIVMREAFKTLSILLYAVS-KVPSAQLIGRVDGDVLFFPNLFQSFLDKDNTNSSIYGYIAEEGKPTTSKCCKSRNFLFPFKCSNYL---SFLSGFFLLTRPAAEKLL---NASKHDFHQIDDLITGQMADDAG----------------------------------------
>GT31-Galt-Gnt|CAD44086.2|Nematoda_Metazoa Caenorhabditis elegans;-;Hexosyltransferase (EC 2.4.1.-)
LQITILSTA-GNF-DIRQAIRETWANPNNVANNDVRISFIISKTS-NEF-------LNFALQKEILKVHAILSYKQS-HCQLADFQLKIDDDMAVDMDGLYRSLEDKKQSNGISGIIWKNSPPVREKKHRWYVPKTLYSEKFFP---PYIDGIYLIGKNAVPRML---EEAKNNQWIIEDVF-------------------------------------------------
>GT31-Galt-Gnt|CAE18060.2|Nematoda_Metazoa Caenorhabditis elegans;-;Hexosyltransferase (EC 2.4.1.-)
-ILVIRSGP-GSL-DYRNFIRRTWKQQVET---LVPVVFVCATSK------------NDTLKIESWKMMAIYGFVID-QLPSVDQIVVTNDDTIVNATALEQVL--HMKGPVMLGKVSRGYPRIFLPWLTWHVPSEMYPNLCYP---LFVQGSFVLSKDGAKLLV---ENVCKPMVHLDDVFMGVLSNCVGLIHN--EGFHSFD---------------------------
>GT31-Galt-Gnt|CDI73685.1|Alveolata_Protista Eimeria praecox;-;Hexosyltransferase (EC 2.4.1.-)
--LVTMTGA-ADA-EARAVVRSTWGGVSRVGNRRVRVFFVLGTVG-SHE-AQQA------VEKETYKTITAFRWIKD-ACPEAKFLVKADADVFIDMNRLLGYLNAHQGKDVAAGVLRTNVQVIREPTNRNYEDPGVYSPATYP---PYLSGLYIISADLVAKIA---AVAKWPVLSNEDCFVGTCLEALGPQSS--APAAMIDAIHPVKE-----R-LLTLW--------
>GT31-Galt-Gnt|CDS11352.1|Mucoromycota_Fungi Lichtheimia ramosa;-;Uncharacterized protein
--------P-KSL-TKRQVFRETTMQLMPENNDKIAYFFIMGQPA-SDKVETMWPKIQD----ESKKVFSTMEWAEQ-Y--EFDYLVKTDDDIFIRWDTITKELVDLGVTRYWQGLSYWNIPPIRDNSNKN--SEFDYPLPLFP---RYTAGLYIISRDLVHLIA---RGPR-----------------------------------------------------------
>GT31-Galt-Gnt|NP_542172.2|Chordata_Metazoa Homo sapiens;B3GT6;Beta-1,3-galactosyltransferase 6 (Beta-1,3-GalTase 6) (Beta3Gal-T6) (Beta3GalT6) (EC 2.4.1.134) (GAG GalTII) (Galactosyltransferase II) (Galactosylxylosylprotein 3-beta-galactosyltransferase) (UDP-Gal:betaGal beta 1,3-galactosyltransferase polypeptide 6)
LAVLVASAP-RAA-ERRSVIRSTWLARRGAPGDVWAR-FAVGTAG-LGA-EER-----RALERETAKVLAMLAWLDE-HVAF-EFVLKADDDSFARLDALLAELRAREPRRR------------RLYWGFFSGRGRVKPGGRYL---PYALGGYVLSADLVHYLR---LSRDYRAWHSEDVSLGAWL--------------------------------------------
>GT31-Galt-Gnt|WP_013110368.1|Planctomycetes_Bacteria Planctopirus limnophila;-;Glycosyl transferase, family 31
LIIGVLSAD-NEQ-ARREAIRQTWGKDLP---ADVELVFLVGRP--------------DLVELPTEKTIWFCRWLQS-SRNFAR-VLKCDDDTYVHVARIL--------RDRMTADYVGAPTPQR-----------VAAGRPFE---TASGGGYLLS-PKAVSI----VAASEQQHWQEDVHVAQVLHAAG----------------------------------------
>GT31-Galt-Gnt|XP_001848626.1|Arthropoda_Metazoa Culex quinquefasciatus;-;Hexosyltransferase (EC 2.4.1.-)
LLMLVLSAP-THF-VHREAIRNTWGHHES---PDVTIAFLLGNSL-NQG-------VEERLTAETLKTVSMLEWTGV-HCSKARFLLKVDDDMFINVPKLLDFVKARDVRSIF-GRLADGWPALRDRSSKWYVSWEEYGLDRYPAFTPSCEGAYLLTADVVQDLY---CEALGPFFKLEDVFTGMVAERLNRIGV--KEFLNVRSIHDLQT-----E-QLELW-------K
>GT31-Galt-Gnt|XP_002607624.1|Chordata_Metazoa Branchiostoma floridae;-;Hexosyltransferase (EC 2.4.1.-)
LLILVTTTP-QGQ-VQRETIRKTWGNESNIPGVIFKTVFAIGHTD-D------AATQAALVE-ETLKTVMCWKWAFQ-YCPQARFIMKADDDTFVNIFSIARHLIGLHKRRHVTGWVYVDTKPIRDPWNKWYVKYEDYPRDSYP---KYPCGAYVISNDITKVLY---ETSETKYLFLEDAFLGLCMEKLGPVHH--GGFVPW-ASHWVAY-----EYMWYLW--------
>GT31-Galt-Gnt|XP_002974244.1|Streptophyta_Viridiplantae Selaginella moellendorffii;-;Beta-1,3-glalactosyltransferase-like protein
LFIGISSTS-SHF-GERMAARKTWMRSPSILSGRVVARFFVALCA-DNY-------MNLQVKQEVLKTIAICEF-GV-RNFSAKYTMKCDDDTFSHVESILHELEMTPYTGLYMGNINRYHRPQR--MGKWAVTYKEWPEDEYP---LYADGGYVVSADIANFIH---HEKRTRIFKMEDVSMGLWVSQFANPHH--SKFCQWGTAHYMPR-----Q-MVCMW--------
>GT31-Galt-Gnt|XP_005643109.1|Chlorophyta_Viridiplantae Coccomyxa subellipsoidea;-;Hexosyltransferase (EC 2.4.1.-)
LFVGVLTAG-KNA-DRRAAIRASWGSDRRLH----RVMFF--SAK-PVD-EAVFDELRR----ETHQTLEILR-AAS-MDPLATHALKVDDDSYVHVDTLMAVM-ARVPRRLFMGHIRESGGPHREPSSQWYVTKEEWPTESYP---YWAHGGYVLSKDLVREVA---SGAALRIFKLEDVAMGSWIEYIAKGSH--TGFNFMG---------------------------
>GT31-Euk|AAC69935.1|Streptophyta_Viridiplantae Arabidopsis thaliana;B3GT3;Probable beta-1,3-galactosyltransferase 3 (EC 2.4.1.-)
-VVGINTAF-SS-RKRRDSVRTTWMPSGEKKKLEEEKGIIIRVIG-HSA-TAGGILDRSIEAEDELSGKTKTYFSTAVSKWDAEFYVKVDDDVHVNIATLGETLVRHRKHRVYLGCM-KSGPVLSQKGVRYHEPEYWKFGENNKYF-RHATGLYAISRDLASYIS---LNQHVHKYANEDVTLGAWFIGLDIDDRR-LCCG------------------------------
>GT31-Euk|AAD30250.1|Streptophyta_Viridiplantae Arabidopsis thaliana;B3GT1;Probable beta-1,3-galactosyltransferase 1 (EC 2.4.1.-)
-VIGINTAF-SS-RKRRDSVRSTWMPQGENKKLEEEKGIIVRVIG-HRY-KSHGILDKAIEAEEKLSAKTKTFFATAVSLWDAEFYIKVDDDVHVNLASLKKALSAHQNPRVYVGCM-KSGPVLARKSVKYHEPEYWKFGEGNKYF-RHATGFYAISKDLATYIL---INQDLHKYANEDVSLGSWFIGLNVDEKR-LCCS-TS---------------------------
>GT31-Euk|AAF31275.1|Streptophyta_Viridiplantae Arabidopsis thaliana;B3GT6;Beta-1,6-galactosyltransferase GALT31A (EC 2.4.1.-) (Beta-1,3-galactosyltransferase 6) (GT31 family galactosyltransferase 1) (AtGALT31A)
-VMGIMTAF-SS-RKRRDSIRGTWLPKGDEKRLETEKGIIMRVIG-HSS-SPGGVLDHTIEAEEELSSKTQIYFSSAVAKWDADFYIKVDDDVHVNLGMLGSTLARHRSPRVYIGCM-KSGPVLAQKGVKYHEPEYWKFGEENKYF-RHATGIYAISKDLATYIS---VNRQLHKYANEDVSLGSWFIGLDIDDRS-LCCG------------------------------
>GT31-Euk|AAF59065.1|Arthropoda_Metazoa Drosophila melanogaster;-;Hexosyltransferase (EC 2.4.1.-)
-----------------------------------------------------------LEKEQNLTAKLMQSLYILRRHYEFSYMLKVDDDTYVKLDSLVNTLVSYDRPQLYWGYF-NGRSTIKTKG-QWKESSYYL---SKNYL-PYALGGYVLSRSLCDYIV---NNSQLSHYGSEDVSVGTWLAPLR----------------------------------------
>GT31-Euk|AAF60408.1|Nematoda_Metazoa Caenorhabditis elegans;SQV2;Beta-1,3-galactosyltransferase sqv-2 (EC 2.4.1.134) (Squashed vulva protein 2)
--ISILTSP-NE-TERRQNVRDTWFRLST----KGPSVFIAKAVG-TMG-LAAEDR-RLLAEENRLAKKTLACFVHAFANFKFKFFLKTDIDSFVRITPLIINLKQIQDPMLYWGFL--DGRAKPFRKGKWKEPEW---NLCDRYL-PYQLGGYVLSYELIRFLA---INAQLRHYRNEDVSVGAWIGGLDVHDPR-F---------------------------------
>GT31-Euk|AAF69535.1|Streptophyta_Viridiplantae Arabidopsis thaliana;B3GTE;Probable beta-1,3-galactosyltransferase 14 (EC 2.4.1.-)
--VGIQTGF-GS-AGRRRSLRKTWMPSDEGRRLEESTGLAIRMIG-KSE-EKMAQLRREIAEY-KLPYKTLVFFKAAYALYDSEFYVKADDDIYLRPDRLSLLLAKERSSQTYLGCL-KKGPVFTDPKLKWYEPLSHLLG--KEYF-LHAYGIYALSADVASLVA---LNRHALMFNNEDVTIGAWMLAMNENHHI-LCCS-PS--S------------------------
>GT31-Euk|AAF86563.1|Streptophyta_Viridiplantae Arabidopsis thaliana;B3GT5;Probable beta-1,3-galactosyltransferase 5 (EC 2.4.1.-)
-VIGINTAF-SS-RKRRDSLRETWMPQGEKEKLEKEKGIVVKMIG-HSS-TPNSMLDKEIDSEDNLSAKTKSFFSSAVAKWDAEFYVKIDDDVHVNLGTLASTLASHRSPRVYIGCM-KSGPVLTKKTAKYREPEFWKFGEENKYF-RHATGIYAISKDLATYIS---NNQPIHKYANEDVTLGSWFIGLEIDDRN-FCCG------------------------------
>GT31-Euk|AAG21603.1|Streptophyta_Viridiplantae Arabidopsis thaliana;B3GT8;Probable beta-1,3-galactosyltransferase 8 (EC 2.4.1.-)
AVIGINTAF-SS-KKRRDSVRQTWMPTGEKKKIEKEKGIVVRVIG-HSA-TPGGVLDKAIDEEDQLSTKTRLYFSTATAMYDAEFYVKVDDDVHVNLGMLVTTLARYQSPRIYIGCM-KSGPVLSQKGVKYHEPEFWKFGEENKYF-RHATGIYAISKDLATYIS---TNQGIHRYANEDVSLGAWMLGLEVDERS-MCCG------------------------------
>GT31-Euk|AAH29564.1|Chordata_Metazoa Homo sapiens;B3GL2;UDP-GalNAc:beta-1,3-N-acetylgalactosaminyltransferase 2 (Beta-1,3-GalNAc-T2) (EC 2.4.1.313) (Beta-1,3-N-acetylgalactosaminyltransferase II)
--------------------------------------------------------------EENVPAKLLNFYRWTVETTSFNLLLKTDDDCYIDLEAVFNRIQKNLDPNFWWGNF-RLNWAVDRTG-KWQELEY----PSPAYP-AFACGGYVISKDIVKWLA---SNSGRKTYQGEDVSMGIWMAAIGYQDSL-WLCE-KT---------------------------
>GT31-Euk|AAK92710.1|Streptophyta_Viridiplantae Arabidopsis thaliana;B3GTA;Hydroxyproline O-galactosyltransferase HPGT2 (EC 2.4.1.-) (Beta-1,3-galactosyltransferase 10)
AVIGVYTGF-GS-HLKRNKFRGSWMPRDDAKKLE-ERGVVIRVIG-RSA-NRGDSLDRKIDEENELPKKVKFFYSAAVQNWDAEFYVKVDDNVDLDLEGMIALLESRRSDGAYIGCM-KSGDVITEEGSQWYEPEWWKFGDDKSYF-RHATGLVILSKNLAQYVN---INSGLKTYAFDDTTIGSWMIGVQIDDNR-LCCS-ST--RQEK--------------------V
>GT31-Euk|AAM62612.1|Streptophyta_Viridiplantae Arabidopsis thaliana;B3GT4;Probable beta-1,3-galactosyltransferase 4 (EC 2.4.1.-)
-VVGVNTAF-SS-RKRRDSVRATWMPPGEEKKLEEEKGIVMRVIG-HSS-TPGGILDRAIQAEEELSAKTKTYFTTAFAMWDADFYVKVDDDVHVNIATLGAELARYRMPRVYIGCM-KSGPVLAQKGVRYHEPEYWKFGEENKYF-RHATGLYAISRELASYIS---INQNVHKYVNEDVSLGSWFLGLDVDDRR-LCCG-TT---------------------------
>GT31-Euk|AAU05453.1|Streptophyta_Viridiplantae Arabidopsis thaliana;B3GTC;Probable beta-1,3-galactosyltransferase 12 (EC 2.4.1.-)
--VGIQTGF-DS-GDRRTALRSTWFPSDDSLRLEQATGLAFRVIG-KSA-KKMAELEKEIKEYR-LPYKTLAFFKAAFKLFEADYYVKADDDIYLRPDRLATLLANERLSQTYIGCM-KKGPVITDPKLKWYEKQGNLIGNE--YF-LHAYGIYVLSAEIASLAA---ARNGSRMFNNEDVTIGSWMLAMDEDNRA-LC--------------------------------
>GT31-Euk|AAU94388.1|Streptophyta_Viridiplantae Arabidopsis thaliana;B3GT9;Hydroxyproline O-galactosyltransferase HPGT3 (EC 2.4.1.-) (Beta-1,3-galactosyltransferase 9)
AVIGVYSGF-GS-HLRRNTFRGSYMPQGDARKLE-ERGIVIRVIG-RSP-NRGDSLDRKIDEENELAKKVKFFFSAAVQNWDAEFYIKVDDNIDLDLEGLIGLLESRRGDAAYIGCM-KSGEVVAEEGGKWYEPEWWKFGDEKSYF-RHAAGLLILSKTLAQYVN---INSGSKTYAFDDTSIGSWMIGVQIDDNR-LCCS-SI--RQDK--------------------V
>GT31-Euk|BAA97059.1|Streptophyta_Viridiplantae Arabidopsis thaliana;B3GTD;Probable beta-1,3-galactosyltransferase 13 (EC 2.4.1.-)
--VGIQTGF-RS-AGRRRALRNTWMPSDEGRRLEESTGLAIRIIG-KTK-DEAKMVE--LRSEVKLPYKTLAFFKAAYALYDSEFYVKADDDIYLRPDRLSLLLAKERGSQTYLGCM-KKGPVFTDPKLKWYEPLADLLG--KEYF-LHAYGIYALSADVTSLVA---LKNNSRMFSNEDVTIGAWMLAMNENLHT-LCCS-PY--S------------------------
>GT31-Euk|BAB09796.1|Streptophyta_Viridiplantae Arabidopsis thaliana;B3GTB;Hydroxyproline O-galactosyltransferase HPGT1 (EC 2.4.1.-) (Beta-1,3-galactosyltransferase 11)
VVIGIMTSL-GN-KKKRDAVRQAWMGTGASKKLESEKGVIARVIG-RSA-NKGDSMDKSIDTENEASKKVKLFFAYAADRWDAQFYAKAIDNIYVNIDALGTTLAAHLEPRAYIGCM-KSGEVFSEPNHKWYEPEWWKFGDKKAYF-RHAYGMYVITHALARFVS---INRDIHSYAHDDVSTGSWFVGLDVDEGK-FCCS-AS--HMRR---------------------
>GT31-Euk|BAD43246.1|Streptophyta_Viridiplantae Arabidopsis thaliana;B3GT7;Beta-1,3-galactosyltransferase 7 (EC 2.4.1.-)
-VMGINTAF-SS-RKRRDSVRETWMPQGEKERLEQEKGIVIKMIG-HSA-TSNSILDRAIDSEDELSAKTKIFFSTAVAKWDAEFYIKVDDDVHVNLGMLASTLARHRSPRVYIGCM-KSGPVLAQRTVKYHEPEYWKFGDGNKYF-RHATGIYAISKDLANYIS---INQPIHKYANEDVSLGSWFIGLEIDDRN-FCCG------------------------------
>GT31-Euk|CDP13543.1|Streptophyta_Viridiplantae Coffea canephora;-;Hexosyltransferase (EC 2.4.1.-)
AVIGVYTSF-GS-RLRRNIFRVSWMPKGDASKLE-ERGIIIRVIG-RSA-NRGDSLDRNIDEENELPKKAKFFFSTAVQMWDAEFYVKVDDNIDLDLEGLIELLQSRRGESAYMGCM-KSGEVVAEEGRPWYEPEWWKFGDQKSYF-RHAAGLFILTKNLAKYIY---INSASKTYAHDDTSVGSWMMGLQIDDSR-LCCV-NA--RQDK--------------------V
>GT31-Euk|EYB85970.1|Nematoda_Metazoa Ancylostoma ceylanicum;-;Hexosyltransferase (EC 2.4.1.-)
----IMSSP-ND-SAVRAVIRDTWLRL-------SRKGVMHRPIG-TK--KLGETERLHLEEEQNLALKTLRSMEYAYQNFKFHYVLKVDSDSFVRLGAMIKALKD-IQPRLYWGFL--DGRAKPIRKGKWRESDWILCD---RYL-PYQLGGYVLSYELVRYLA---LNSRLKMYKNEDVSVGAWLAGLDVHDPR-F---------------------------------
>GT31-Euk|KFW02517.1|Chordata_Metazoa Fulmarus glacialis;-;Hexosyltransferase (EC 2.4.1.-) (Fragment)
----IMSGP-KY-SERRSIIRSTWLSAAGH---PPHDDIWSRVIG-TAG-LGAEEL-RSLELEQNLTAKVLATYVWLDLHLDFQFALKADDDTFVRLDVLVEELRAK-ERRLYWGFF--SGRGRVKSGGKWKESAWVLCD---YYL-PYALGGYVISADLVRYLR---LSKDYNMWQSEDVSLGVWLAPIDVHDPR-F---------------------------------
>GT31-Euk|NP_001077462.1|Streptophyta_Viridiplantae Arabidopsis thaliana;B3GT2;Probable beta-1,3-galactosyltransferase 2 (EC 2.4.1.-)
-VVGINTAF-SS-RKRRDSIRATWMPQGEKKRLEEEKGIIIRVIG-HSA-TTGGILDRAIEAEDELSGKTKTYFSTAFSMWDADFYVKVDDDVHVNIATLGETLVRHRKPRVYIGCM-KSGPVLSQKGVRYHEPEYWKFGENNKYF-RHATGLYAISRDLASYIS---INQHVHKYANEDVSLGAWFIGIDIDDRR-LCCG------------------------------
>GT31-Euk|XP_002303622.1|Streptophyta_Viridiplantae Populus trichocarpa;-;Hexosyltransferase (EC 2.4.1.-)
VVIGIITTF-GR-KKNRDAIRKAWMPTGAAKKMEDEKGIVLRVIG-RSA-NRGDSLDREIDNENEQPKKSKLFFIHAVETWDAEFYAKVNDDVYVNIDALGATLSTHLDPRTYIGCM-KSGEVFSEPTHKWYEPDWWKFGDAKSYF-RHASGIYAISRALAQFIS---INRSLRTYAHDDVSTGSWFIGLDIDESK-FCCS-SW--ATGS--------------------I
>GT31-Euk|XP_002436508.1|Streptophyta_Viridiplantae Sorghum bicolor;-;Hexosyltransferase (EC 2.4.1.-)
AFVGIFTGF-GS-IGRRRALRRTWLPADQGLRLEEATGLAFRVIG-KSN-SKNKMA--ALNREVRLPYKTLAFFKAAYALYDSDFYVKADDDIYLRPDRLSLLLAKERSPQTYIGCM-KKGPVFTDPKLKWYEPQSFLLGSE--YF-LHAYGIYALSADVASLVA---LRNNSRMFSNEDVTIGSWMLAMNENTHA-LCCT-ES--S------------------------
>GT31-Euk|XP_002768901.1|Alveolata_Protista Perkinsus marinus;-;J domain-containing protein
-VIVIPSHI-TE-FSRRCAVRDGWARRGHENNRAGLRSIKLLTVG-AHY-PDNSTRDTAM-AEMALGTKVRLSFREAVDRLGRRLVLKADTDSYVHVEKLLDFFDKENNDPVYAGSF-RHAPVMWEPDHKWFDGEFTKMTGLTQYP-WNAQGGYVISYDLAKYLA---HPPLEKSWTHEDVGVGAWLMALDVD--------------------------------------
>GT31-Euk|XP_011398441.1|Chlorophyta_Viridiplantae Auxenochlorella protothecoides;-;Hexosyltransferase (EC 2.4.1.-)
AFVGIQTGF-TT-NNRREALRATWAPSNESRKLETESGIVARVVG-HSP-DSG--AEAALNAEEDLPRKTLLFFETVLRQYDPQYIVKVDDDVYLRLDRVPAAVEQWASGADYIGCM-KNGQVIKTPRYRWYEPSHALLG--SQYF-THTWGAYVVSKAAALLTS---LPTGSRHLANEDVTLGAWMLALNYDDRR-MCCS-PA--S------------------------
>GT32|AAD48406.1|Chordata_Metazoa Homo sapiens;A4GCT;Alpha-1,4-N-acetylglucosaminyltransferase (Alpha4GnT) (EC 2.4.1.-)
-FLETSEPPH----CSVESAAKIYPE---WPVVFFMKGTMPSAFSFSAIDFPDMKRLLEDTPLFNWLHISSDASRLAII--WKYGGIYMDTDVISIRP-IPE--------ENFLAAQA--SRYPHHPFLWECMENFVEHYNSAIW--GNQGPE-LMTRMLRVWCKL--EDFQELHPQRFYPISYRE-WRRYVWDTE--P---SFALHLWN------HMNQEG-R-------
>GT32|AAF07826.1|Streptophyta_Viridiplantae Arabidopsis thaliana;-;Alpha 1,4-glycosyltransferase family protein (Glycosyltransferase) (MZB10.5 protein) (T16O11.2 protein)
-FMMTWSPAEKREILSVESVFKSHAR---GCLMILSSTDLQGLKPFDRGYVTDLPFLLKDTAGESLAQNLSNLMRLAYL--FKFGGVYLDTDMIVLKS-FKTL-------RNVIGAQTLNWTRKNHPFLLKSIEEFALTFNGNVW--GHNGPY-LVSRVARAV---------ELTPPAFYPVNWVE-IEKLVPRTEKDKVLEMQGLHLWN------KFSRKF-E------I
>GT32|AAF51162.1|Arthropoda_Metazoa Drosophila melanogaster;-;Alpha1,4-galactosyltransferase 1 (EC 2.4.1.-) (GH17972p)
FFHETSRLSEARQACAIESAAMHNPN---FQVFVLFAGTRISLEAIS-YSRRNLESYASGTPMEYLFSHISDFLRYLTL--YRYGGLYLDMDVVVLRN-MEKVP------PNYTGAES--NTHAGHEIAASCLRDFQHNFNGGDW--GNNGPG-VITRVAQKICGT--KDIEDFGRGAFYAVPWKQ-WRDFPENLE--ETIARCVVHVWN------KHSSKL-P------I
>GT32|AAF56516.3|Arthropoda_Metazoa Drosophila melanogaster;-;Alpha1,4-galactosyltransferase 2 (EC 2.4.1.-)
FFHETTEKSSAREACAIESAALHNPG---LTVFVLFAGTRPSIRA-HNYKRHNLWRYAAGTPIAFLFPHVSDLLRYVSL--YKYGGLYLDLDVVVQQN-LEKLP------PNFTGAES--NISPGHKIATMCLRDLEANYNANKW--GTNGPG-VITRVVKKQCNT--DNIKNFDANAFYAISWLQ-WKDFPNRHN--VTMKRVVIHVWN------KFSKGW-K------V
>GT32|AAG51645.1|Streptophyta_Viridiplantae Arabidopsis thaliana;-;Alpha 1,4-glycosyltransferase family protein (Glycosyltransferase)
-FFMTWSSIEDRERFTIESLFKFHPN---GCLILVSNSDDRGLKPFDKGLIKDFAYIFKDTSAEPLEQNLSNLLRLVLL--YKYGGIYLDTDVIILKS-LSNL-------HNVIGAQTVKWSRKNHPLLKRFIDEFSRTFNGNKW--GHNGPY-LVSRVITR---I--KI--SLPPSAFYPVDWTR-IKGFAPTNE--SLTHLRAVHLWN------RESKKL-R------I
>GT32|BAA95915.1|Chordata_Metazoa Homo sapiens;A4GAT;Lactosylceramide 4-alpha-galactosyltransferase (EC 2.4.1.228) (Alpha-1,4-N-acetylglucosaminyltransferase) (Alpha-1,4-galactosyltransferase) (Alpha4Gal-T1) (CD77 synthase) (Globotriaosylceramide synthase) (Gb3 synthase) (P1/Pk synthase) (UDP-galactose:beta-D-galactosyl-beta1-R 4-alpha-D-galactosyltransferase)
FFLETSNPNF---MCSVESAARTHPE---SHVLVLMKGPGNAGISLSCFPLPDLRELFRDTPLAYLLPVLSDASRIALM--WKFGGIYLDTDFIVLKN-LRNL-------TNVLGTQS--RYVRRHEFMALCMRDFVDHYNGWIW--GHQGPQ-LLTRVFKKWCSI--RSLAELPPEAFYPIPWQD-WKKYDINPE--ELPRLLAVHVWN------KKSQGT-R-------
>GT32|CAB52870.1|Streptophyta_Viridiplantae Arabidopsis thaliana;Y4990;Uncharacterized protein At4g19900
--FMVWSPGWVRHQRGLESLLSQHRD---ACVVVFSETE---RNSFKDSYAMNLDELLQDTPASFYPTHYSELVRLAAL--YKYGGVYLDSDVIVLGS-LSSL-------RNTIGMEQVAGESKKSPFLLECLNEYYLTYDDKCL--RCNGAD-LLTRVAKRFLNG--KNRRM-PSSVFFPINSQQ-ITNYYPQDE--SFKKILTFHFWN------SVTSSL---------
>GT32|CAB69853.1|Streptophyta_Viridiplantae Arabidopsis thaliana;-;Alpha 1,4-glycosyltransferase family protein (At5g01250)
-FVMTWSPADNREVLAIESVFKSHPY---GCLMILSATDPQGLKPFDRGYVTDLPFLLKGTAGESLAQNLSNLMRLAYL--YKYGGVYLDTDMIVLKS-FKGL-------RNVIGAQTLNWTRKNHPLLLKFMEEFAKTFNGNIW--GYNGPY-LVSRVARAV---------EMRPSVFYSVNWLE-IKKLVPKTEKDKLLHMQGLHLWN------KFSRKY-E------I
>GT32|EFX83648.1|Arthropoda_Metazoa Daphnia pulex;-;Gb3_synth domain-containing protein
FFIET-SGNGYRQACAIESLALHNPN---LKINVLFTDKINAVQQLENYAIDKVDEYMAGTLMEYHVNNLSNALRLLTV--YKFGGYYFDLDIISVRP-VTSY-------RNFVAA--VDREIAKHRFIELAIKDFVTNFRPDLW--GNNGPA-LIFRVLKKWCNS--EDHKELPAPSFHPVHHFE-MQKLEPMAN--ETEELTGVHLWN------RMNKDD-P------I
>GT32|EIA62764.1|Proteobacteria_Bacteria Campylobacter coli 80352;-;hypothetical protein cco14_08615
------------------------------------KGKIGLIKSWDHGYYTNLEFILKDAPFESF----SDFFRYNLL--YLRGGVWVDLDMVCLNF-YDYK-------QDYIFNSEFNEQAKQSEFGKLLIEEAKKIVDDNKW--GIIGPW-FLAKWVKEYDLE--KHALDGNTRDFID-------KKIENRL----CLHLFRIYKMN------K--------------
>GT32|KGB77778.1|Basidiomycota_Fungi Cryptococcus gattii serotype B;-;Uncharacterized protein
----------ERQTATFLSFLATQPH---STLILWTNGNLRAVAPFKRGEREDLDVLTQGTELAFDERVDGDAVRLLVL--WNYGGIWMDMDQLLTRD-LHPL-------TE--EEWVTQWFSPFSPYLCEAFHIMASSPNTFTW--GSHLYA-KLHRAANKWC------FSDFPPPTFAGIPWSS-SQDGGGKSE--LLEEKSSIHLHN------QWSKSF---------
>GT32|KOO29038.1|Haptophyceae_Protista Chrysochromulina sp. CCMP291;-;Alpha-1,4-galactosyltransferase-like protein
-FLLLWTAATLRSRRCLESLLFHHPR---ATVRVFSNSP---IAPLAAGYQGDVAELLRGTPAAYWYSHLTDVLRLALL--WREGGVYVDTDVVLMRP-LPPL-------PLAMGIESFSSPIRRSPLLWVAMHEFASTYHPELW--GWNGPE-LLTRVAGAFSNA--PSGARLPPEVFYPIHWKD-VAAYAEDLA--RQERMEAVHLWN------RKTAAL---------
>GT32|KOX78307.1|Arthropoda_Metazoa Melipona quadrifasciata;-;Lactosylceramide 4-alpha-galactosyltransferase
FFHETSEDGLARQACAVESAAKMNPN---MNVYLLFVSPKISMFHQQSYSRHKPEEYVKNTPLDWPRSHMSDILRYLTL--WKYGGIYLDLDVVVITS-LEHL-------TNFAGAE--DWDNAGRRIADACIRDVRANFRGDIW--GNNGPG-VITRTLQKLCST--KYVRDFSPSAFYPIHYKK-WKVYTKDRN--KTMKIVAIHVWN------KFSKSE-K------V
>GT32|NP_001154561.1|Streptophyta_Viridiplantae Arabidopsis thaliana;-;Alpha 1,4-glycosyltransferase family protein
-FFMTWSPAEKREMLAVESVFKAHPQ---GCLMIVSGSDLQGLKPLDRGYATDMSLLLENTPAKPLHQNLSNLARLAFL--YKYGGVYLDTDFIVTRS-FKGL-------KNSIGAQTVNWTRKDHPLVYSFIEEFASTFDGNKW--GHNGPY-LVTRVAQR---------ARLPPVAFYPFNWLD-IPRLTPRKT--DLVKLNGLHLWN------KITRKL-K------I
>GT32|NP_181350.2|Streptophyta_Viridiplantae Arabidopsis thaliana;-;Alpha 1,4-glycosyltransferase family protein (Glycosyltransferase)
-FFMIWSPANPREMLAIDTLFTTNPG---ACLAILSNSDPNGLKPLDQGFVTDIPFLVKNTPAEPLFMNLSDLTRLAVL--YKYGGVYLDTDIIFLND-MTGL-------RNAIGAQSSDWTRIYHPLMREFLQEYATTFDGNKW--GYNSPY-LVSRVIKRLGNK--PGY--FSPDAFYPVNWIK-IQKLKPATE--KTVQMNMIHLWN------KVTRKI-K------I
>GT32|XP_001697922.1|Chlorophyta_Viridiplantae Chlamydomonas reinhardtii;-;Predicted protein
--FLTWTGPEALAVECISSVINAYARQFEGGVYLLANQSEKM---LWRRRTRSVEDVLQDTPLSYWFSHVTDLMRFALV--YKHGGIYMDTDVLVMRP-ISNH-------VNKLVRALSDSNWAGHPYLFEVLKQIPRHYRAVDW--ISAGPK-ALTIVYE---HA--PMHAM-DPGVYLGIRLTK-AKRF--EGH--IRTKDFVIHLWG------STARGY-V------I
>GT32|XP_002531344.1|Streptophyta_Viridiplantae Ricinus communis;-;Lactosylceramide 4-alpha-galactosyltransferase, putative (EC 2.4.1.228)
-FFMTWSPVSRREFLAMDSLFKVHPN---GCLMILSGTDIQGLKPLDVGFVTDLQFLFKNTPAEPLSQNLSNLIRLAVI--YKYGGIYIDTDFIFLKS-FKGL-------RNSIGAQSINWTRKNHPLMYKFIEEFAATFDGNKW--GHNGPY-LVSRVVARVAGR--PEY--LPPKAFYPVDWNR-IGGFKPEKA--KLLQLSGLHLWN------KQSCRI-R------I
>GT32|XP_002935130.1|Chordata_Metazoa Xenopus tropicalis;-;Gb3_synth domain-containing protein
MFVETTEPPH---LCSIESAARAYPD---RPVVYFMKGAINSSYPTLSYDFPRMNVLLNNTPLMYWNHVSSDACRLALI--YKYGGIYMDTDIITFRP-IPE--------KNFLAAET--SQMPKHTIVWQFMEDFVNGYDGTVW--GQQGPL-LYNRILNRYCKV--PPFKELNMERFFPVPGMQ-WETFVCEKL--PT---FALHLFN------YANSNQ-R------K
>GT32|XP_010648636.1|Streptophyta_Viridiplantae Vitis vinifera;-;PREDICTED: uncharacterized protein At4g19900
-FFMVWSPPWIRHQRGLESLLSHHRD---ACVVVFSETED--FKDFEKGFAMNLDELLKNTAASFYSTHYSELVRLAAL--YKYGGIYLDSDIIVVKP-LSSL-------NNSVGLEQLAGSSKDSPFIMECLNEFYSTYDDTCL--KCNGAD-LLTRVAKKFLSK--ENASDQPSFIFFPISPHN-ITRYTPATE--TFSKILTFHFWN------SLTSSL---------
>GT32|XP_011958153.1|Chordata_Metazoa Ovis aries;-;PREDICTED: alpha-1,4-N-acetylglucosaminyltransferase isoform X3
-----------------------------SCLICYLPSKQQGLEALGRGR--ETSERMEPTPLVFWLHISSDASRLAFI--WKYGGVYMDTDVISIRP-IPE--------DNFLAAQ--KSQFPHHPFLWECMENFVENYNPRIW--GHQGPE-LMTRLLRVWCKL--RDFQELHPQRFYPISFRA-WRRYVWDTE--P---SFALHLWN------HMNQEG-K-------
>GT32|AAA68909.1|Ascomycota_Fungi Saccharomyces cerevisiae;SUR1;Mannosyl phosphorylinositol ceramide synthase SUR1 (EC 2.4.-.-)
IIHQTY-TEDEHWKEGRQKCLDLHPD---YKYILWTDEM---AYEFKEEY----PWFLDTFENYKYPIERADAIRYFIL--SHYGGVYIDLDDGCERK-LDPLL----------AFPAFLRKTMGSVPRHPFFLKALKSLKYDKYWFGSTGPL-FLSVIWKQYKR------------------------------------------------------------------
>GT32|AAB39300.1|Ascomycota_Fungi Saccharomyces cerevisiae;HOC1;Putative glycosyltransferase HOC1 (EC 2.4.-.-) (M-Pol II subunit Hoc1p) (Mannan polymerase II complex HOC1 subunit)
-IWQTWNDEGERVQDIKGMWESKNPG---FAHEVLNHDV---INALHHYFYSI-PEILETYEALPSIILKIDFFKYLIL--LVHGGVYADIDTFPVQP-IPNWLS-PSDIGLIVGVEEDAQRAIQAKPGHPVLREIISRIIETTLQRSWTGSG-LWTDTIFTYFND--FMNLNQPKLLSDVLVF---P-KFNCPN------QIDITHLAS------QFW-----------K
>GT32|AAT92768.1|Ascomycota_Fungi Saccharomyces cerevisiae;OCH1;Initiation-specific alpha-1,6-mannosyltransferase (EC 2.4.1.232) (Outer chain elongation protein 1)
-VWQTWDDKNSSFRTYQKTWSGYSPD---YQYSLISDDS---IIPFENLYAPV-PIVIQAFKLMPGNILKADFLRYLLL--FARGGIYSDMDTMLLKP-IDSWPS-QNQPGLVIGIEADPWYAIQAKPGHPILRELILNITATTLANNWTGPG-IFSDIIFEYMNN--VLRLKEPVIVDDVMVL---PITSPDVGQ--MGAQSSVKHMFS------GSW-----------K
>GT32|AGF85294.1|Mimiviridae_Virus Moumouvirus goulette;-;Uncharacterized protein
ILHQIWGYEKNDLKKYHINCQKVNNN---FEHVLWDDDK---IRKLDKFG----PEYLETYDYFKVPAQKADFARYAIL--YTYGGIYLDMDMVCRKN-LESLL----QYNFFLTPQIVPLFTIGSRKNHPIFKIIFKNIFFRKNLKASTGTG-LFYDSIIEYIKK--NP-------IHDITLI---DRKYPCNMY--NGEMC-VAHTNY------SSW------------
>GT32|CAA85120.1|Ascomycota_Fungi Saccharomyces cerevisiae;CSH1;Mannosyl phosphorylinositol ceramide synthase CSH1 (EC 2.-.-.-) (CSG1/SUR1 homolog 1)
IIHQTY-TNDEQWVKGRQKCIDLHPD---YTYILWTDEM---SDTFKQEY----PWFLDTFRSYEYPIERADAIRYFIL--SHYGGIYIDLDDGCERR-LDPLLK----------VPAFLRKTMGSVPRHPFFLKVIKSLKYKKNWYGSTGPL-FISKQYKRWSNT--AEN------------------------------------------------------------
>GT32|CCY22624.1|Firmicutes_Bacteria Firmicutes bacterium CAG:24;-;Glycosyltransferase sugar-binding region containing DXD motif family protein
-IHYCWGRNPESAKKCIESWKKYCPE---YEIIEW-NEN---NFDLENRY------AREAYEQKKWAFV-SDYARLKIV--YEQGGIYMDVDVELIKP-LDEL----TELDGYMGFEKEIWIA-GARAGHPIVGALLKDYEDIPFIKESC-PG-RNTRTLRTFGLR--LDNTKQE--IDGIIFL---PTQYPVSYF--HRKKEISIHHYD------GSW------------
>GT32|WP_008713321.1|Synergistia_Bacteria Synergistes sp. 3_1_syn1;-;Uncharacterized protein
IIHYCWGQNPPLAVKCIESWKRYCPG---YEIKEWSEDN---FDIHCQYV----EEAY----SAKKWAFVTDYVRLYVL--KEFGGIYMDTDVEVLKP-LDRFLV-H---PAFSGFEQQTSIPIASEKDNFWVSYLLSYYDTKNFLKLTTNVE-TITQMTAERYNF--AANNTYQELGNDVVLY---PIEYPKDIF--TGKLNITIHHFN------ASW------------
>GT32|XP_005644186.1|Chlorophyta_Viridiplantae Coccomyxa subellipsoidea;-;Uncharacterized protein
VIHQTYSGN-GSLKPFMHSWRRLNED---WEIRFYDDEA---CLKFQREF----PEYMDAYRSLAKDVERSDFFRYMVV--LRMGGIYADIDTECRKP-LNNLIL-PRDT-LVVGWENERKYVFAGAPGHPALREICDHIARSTGTAERTGPG-VWTDIIL----K--HARAHPPSKKDDVRVL---PKVYVHPLG--LDGVGPVLHHFL------GSW-----------K
>GT32|XP_008910894.1|Stramenopiles_Protista Phytophthora parasitica;-;Uncharacterized protein
LIHQSWSVYRTRFHPWMKSWVEFHPT---WTYVFWTDAD---NLRLELLY----PQYLHVAKAVRK-VSLADMARYALL--HQVGGLYVDADFECLQP-FDDLHR-EN--NLFLSSEPLLEKSMASAPRHPFWLSVLDNIKKKFDREELTGPR-MVKQTYLS-PNS--TFNLKGSDMV----VF---TSEYPEVAY--WNRQRHATHHWQ------CTW-----------C
>GT32|XP_009061214.1|Mollusca_Metazoa Lottia gigantea;-;Uncharacterized protein
IIHQTWST-AQMFVPWVKTWMKRNPD---WEYWFWTDEA---TRKFADKY----PDFLPTFDGYSQPIRRADAMRYFIL--YEYGGVYADLDVESIQS-FSPIIK-KYSC--FLGQEPFVHSVMGCRKGHPFMKSLVEKLP----LFDSTGPH-FVTLWYREY-----EKHHYPPDHVNGTYLA---PAHYPNLNQ--MGKKTSANHHWV------HT-------------
>GT32|XP_013936666.1|Ascomycota_Fungi Ogataea parapolymorpha;-;Membrane-bound alpha-1,6-mannosyltransferase Initiation-specific
-IWQTWEDDNKQYRRFQKTWVEKNPD---YVYHLIPDSV---IEDFASLYANV-PEVVRAYQLLPKNIMKADFFRYLVI--YARGGTYSDMDTVCLKP-IKDWLS-QIDPGLVIGIEADPWFSIQAKPGHPLLRELIIRIVEETEGKQWTGPG-IFTDTLFDYLNNVALTNMDKPKIMGDVMVL---PITSPNVGH--MGSKSSVEHLFS------GSW-----------K
>GT34|AAB48372.1|Ascomycota_Fungi Saccharomyces cerevisiae;MNN10;Probable alpha-1,6-mannosyltransferase MNN10 (EC 2.4.1.-) (Bud emergence delay protein 1) (Mannan polymerase II complex MNN10 subunit) (M-Pol II subunit MNN10)
---------------SIENKKAYAKRHGYIKDLTT------------------------SKRYSYREGWQKVDILRQTFRENAEWFWWLDLDTMIMEPSKSLPLNLRDDPYVDYSEEMEFL--ITQD-CGG----------------FNLGSFLIKNSEWSKLLDMW----------------------------------------------------------------
>GT34|AAC32437.1|Streptophyta_Viridiplantae Arabidopsis thaliana;GT7;Putative glycosyltransferase 7 (AtGT7) (EC 2.4.-.-)
MVTGSQCKNPDLLLRFFKNKVDYCRIHG-HDIFYS------------------------NALLHMNSYWAKLPAVKAAMIAEAEWIWWVDSDALFTDMDFTPPWRRYKENLVVHGWPGVIY--NDRS-WTA----------------LNAGVFLIRNCQWSMLIDTWTGPVSPFPESDDQTALLYLLYKHRYYPKIYRYLEMERVTHFTGC-----QPCSGDHGDTCWNGQ
>GT34|AAG52374.1|Streptophyta_Viridiplantae Arabidopsis thaliana;XXT5;Probable xyloglucan 6-xylosyltransferase 5 (EC 2.4.2.39) (Putative glycosyltransferase 5) (AtGT5) (EC 2.4.-.-)
LLTGSPCDNPDYLLKSVKNKIDYCRLHG-IEIVYN------------------------MAHLDLAGYWAKLPMIRRLMLSEVEWIWWMDSDALFTDILFQIPLARYQKNLVIHGYPDLLF--DQKS-WIA----------------LNTGSFLLRNCQWSLLLDAWAGPKGPAFEADDQSALIYLLLSQKWMEKVFRYEEMIEVTHFVGC-----KPCGSYAVERCLKSQ
>GT34|BAB11451.1|Streptophyta_Viridiplantae Arabidopsis thaliana;XXT3;Probable xyloglucan 6-xylosyltransferase 3 (EC 2.4.2.39) (Putative glycosyltransferase 3) (AtGT3) (EC 2.4.-.-)
LLTGSPCDNPDYLLKSVKNKIDYCRIHG-IEIVYN------------------------MAHLDLAGYWAKLPMIRRLMLSEIEWIWWMDSDALFTDMVFEIPLSRYENNLVIHGYPDLLF--DQKS-WIA----------------LNTGSFLFRNCQWSLLLDAWAGPKGPAFEADDQSALIYLLLSQKWMEKVFKYEEMMEITHFVGC-----KPCGSYAVERCLKSQ
>GT34|CAB80434.1|Streptophyta_Viridiplantae Arabidopsis thaliana;GT6;Glycosyltransferase 6 (AtGT6) (EC 2.4.-.-)
MVTGSQCKNPDLLLRCFKNKVDYARIHG-HDIFYS------------------------NSLLHMNSYWAKLPVVKAAMLAEAEWIWWVDSDAIFTDMEFKPPLHRYRQNLVVHGWPNIIY--EKQS-WTA----------------LNAGVFLIRNCQWSMLIDTWKGPVSPFPESDDQTALIYLLYKHKYYPKIYRYLEMERITHFTGC-----QPCSGNPGDTCWNEQ
>GT34|CAB80496.1|Streptophyta_Viridiplantae Arabidopsis thaliana;-;At4g38310 (Galactosyl transferase GMA12/MNN10 family protein) (Glycosyltransferase)
MVTGSQCKNPDLLLRCFKNKVDYARIHG-HDIFYS------------------------NSLLHMNSYWAKLPVVKAAMLA------------------------------------------------------------------------------------------------------------------------------------------------------
>GT34|CAB83122.1|Streptophyta_Viridiplantae Arabidopsis thaliana;XXT1;Xyloglucan 6-xylosyltransferase 1 (AtXT1) (EC 2.4.2.39)
LVTGSACENPDYLLKSIKNKIDYCRIHG-IEIFYN------------------------MALLDMAGFWAKLPLIRKLLLSEIEFLWWMDSDAMFTDMVFELPWERYKDNLVMHGWNEMVY--DQKN-WIG----------------LNTGSFLLRNSQWSLLLDAWAGPKGKAFEADDQSAMVYLLATERWGGKVYRYEEMIEVTHFVGC-----KPCGKFGVERCLRQQ
>GT34|CAC01674.1|Streptophyta_Viridiplantae Arabidopsis thaliana;XXT2;Xyloglucan 6-xylosyltransferase 2 (AtXT2) (EC 2.4.2.39) (Putative glycosyltransferase 2) (AtGT2) (EC 2.4.-.-)
LVTGSACENPDYLLKSIKNKIDYCRLHG-IEIFYN------------------------MALLDMAGFWAKLPLIRKLLLSEIEFLWWMDSDAMFTDMAFELPWERYKDNLVMHGWNEMVY--DQKN-WIG----------------LNTGSFLLRNNQWALLLDTWAGPKGKVFEADDQSAMVYLLATQRWGNKVYRYEEMIEVTHFVGC-----KPCGKFGVERCLKQQ
>GT34|KOO25493.1|Haptophyceae_Protista Chrysochromulina sp. CCMP291;-;Glycosyltransferase cazy family gt34-like protein
MVTANQCTTRDIMELALRNKLMYATLHD-YKTWWS------------------------TELVSLEAAWNKIPLLYILM--EIEWLLWMDDDAIFTDMNFTFPFDDYDGNLVIWGDPQRVF--RAND-IQG----------------LNTGVFLLRKCEWSRLMAEVAATPS-A----EQGALTWVLHSQSWKDRVQKWKGQKTVVQYAGC-----QMCGSWHVRKCHSAQ
>GT34|NP_173304.2|Streptophyta_Viridiplantae Arabidopsis thaliana;XXT4;Xyloglucan 6-xylosyltransferase 4 (EC 2.4.2.39) (Putative glycosyltransferase 4) (AtGT4) (EC 2.4.-.-)
LLTGSSCDKPNYLLKAVKNKIDYCRLHG-IEIVYN------------------------MANLDLSGYWTKLPMIRTLMLSEVEWIWWMDSDALFTDILFEIPLPRYENNLVIHGYPDLLF--NQKS-WVA----------------LNTGIFLLRNCQWSLLLDAWAGPKGKAFEADDQSALIYLLLSQKWIEKVYRYEEMIEVTHFVGC-----KPCGSYAVDRCFKSQ
>GT34|XP_005649346.1|Chlorophyta_Viridiplantae Coccomyxa subellipsoidea;-;Uncharacterized protein
IITAIHCIYPDLNFMSVVNKQDYGRLHN-YKVIAA------------------------TNLADLDNMWNKVGWLLKAYHEETEWFMWIDSDTMIINPTFQLPLNKFAGDLVIWGNETALL--AGDG-KSG----------------MNSGVMLFRRTPWMEFLEQVAG--RIGYAYDDQNAFVYVMKTAWHSSHVM-----LQINHFSGC-----QLCNKEG-KECEAE-
>GT34|XP_010028081.1|Streptophyta_Viridiplantae Eucalyptus grandis;-;Uncharacterized protein
LVTGSQCKNKDLLLRFFKNKVDYCRLHG-CDVFYN------------------------NVLLQMFSFWAKYPVVRAAMLAEAEWIWWIDSDALFTDMDFELPLERYKGNLVVHGWTNLIY--EKKS-WTS----------------INAGVFLIRNCQWSMFMDVWAGPQSPFPDSDDQSALIYLLLTQKYGDKIYEYEDMDRVTHFTGC-----QPCSGNHGESCWNGQ
>GT34|XP_680831.1|Ascomycota_Fungi Emericella nidulans;-;Alpha-1,6-mannosyltransferase subunit, putative (AFU_orthologue AFUA_2G14910)
---------------SISNKKEYAKRWG-YKLVVN------------------------MKRYSWREGWEKVDILRETMKKTAEWFWWLDEDHLF-DRLDEVVYRDINENNITHGSIHLLL--SQ-D-CGG----------------FNLGSFFVHRSLFSELLDTWW---DPQWEHKEQDALEYLYINQ-WRSSVADSLDPMVVVNMAGC-----DF-------------
>GT40|AAO92017.1|Euglenozoa_Protista Leishmania major;-;Galactofuranosyltransferase LPG1-like protein
LISVTLENT-QDLKAL---ICNLTMPYR--YIVLAQNGDTPETPFFLRRMFATTRLTVLQFPENIGFAGAVNAGLREALRHEVPFLHIVHNDVRFLFSSLEQAVAGAYKTARDTDMIEALEKELIRQPRTPLLPGTPLPQQHDRKPVGHTSFMFANSREYTSVFLSRLFFDENFPILYDDTDYRWRAHLLGFVEDR-DQVI-----SFARGAATGYTYMQQKWQAHTRREG
>GT40|EGY01064.1|Proteobacteria_Bacteria Nitrospirillum amazonense Y2;-;Putative glycosyltransferase
VVIPIYRGY-EETKAL---AARNTVPCT--LILVDDRGGDERTAYLIQSL---PNVVLLTNPRNWGFVRSVNLGM--AVSD----VVLLNSDAVVGDGWLDQLQGVAY-SRETIGLVHPLS--FSLQCWSDEMAAVPL----SEKAAEFAGQSLPAPTHGFCLYIKRSLFDERFKGYGEEVDFSCRAQIAG----------------------------------------
>GT40|EPY23259.1|Euglenozoa_Protista Strigomonas culicis;-;Galactofuranosyltransferase
LVVPVTLEY-LELKTF---ICNLTVPVG--YLMLINNGIFSPRNLLT-STLGDDRLFYKDHPENIGYAAAVNEGFHTALALQVPWVYVSNCDVRFHPTFLSEFVVKVNTTVQDAPLLLRLSQLSL------------------SDRSGRYGLFFPNCFEMSSFAVSRLLLDENYPAYGEDFDYKWRSEALGFKFVTSGLFK-----HYENKHPIRKEYRRAKWDSGRVLLG
>GT40|WP_052023259.1|Actinobacteria_Bacteria Actinotalea ferrariae CF5-4;-;N-acetylglucosaminyl-diphospho-decaprenol L-rhamnosyltransferase
-------EL-AQFAAS---LSGATTRPY--RLVLVDNGTDP-TAV-VARESGT----VLRTGENLGYGRAANRAAAGATE---PWLVVANPDVVWHPGSLDALLAAAGRPGAGA-----LGPASARE----------LPSLTQGVGH------TTGSGRPAGWLLRREGFDERF-MFFEDLDLGERLAGAGWTNVHVT--------HVGSRAMIRAHHRSA----------
>GT40|XP_817720.1|Euglenozoa_Protista Trypanosoma cruzi;-;Beta galactofuranosyl glycosyltransferase, putative
MVVPLMLDL-MDFRRM---MCNISVPIR--LLVLVQNGREAMSLYLLERVYGSGRLIVSRHPENIGYSAAVNIGLRLALSLEVPFVFVTNSDVMFSPDLLPNLLRDVHETRHDAARMDELAAEVLR-------RGLRVLRSTVNDSRKHYGHFCAYYKSFTSVMLTRLYFDENYPAYVEDVDYSLRLRLLGFQE---GKFV-----HRGNRLMTNQPYAKMKWCCDGYKEG
>GT43|AAD18150.1|Streptophyta_Viridiplantae Arabidopsis thaliana;IRX9;Probable beta-1,4-xylosyltransferase IRX9 (EC 2.4.2.-) (Protein IRREGULAR XYLEM 9) (Xylan xylosyltransferase IRX9)
VVTPIITKDRKVLLRRANTLRLVP-PP--LLWIVVEKHSEEKSSTMLRKTGIMYRRIVFKEDFTSELDHQRNLALRHIEHHLSGIVHFAGLNNIYDLDFFVKIRDIEV----FGTWPMALLSASSQVLGWHLRKINNETETKP----PIHISSFAFNSSILWDPERWGPSSV--EGTKQDSIKYVKQVVLEDDTKLKCSKIMLW--RLKFP-----TRT-R---------L
>GT43|AAD45998.1|Streptophyta_Viridiplantae Arabidopsis thaliana;IRX9H;Probable beta-1,4-xylosyltransferase IRX9H (EC 2.4.2.-) (Protein IRREGULAR XYLEM 9 homolog) (Xylan xylosyltransferase IRX9H)
VVTPTY-NRAQYYLNRAQTLRLVE-SP--VLWIVVEGNVFE-TSEILRKTGVMYRHLVCKRNMTDRGVHQRNTALEHIELHLDGIVYFADDDNIYSLELFQSLRQISR----FGTWPVAMLAQGSQVIGWHTNEKSKRLRRF-----HVDMSGFAFNSTILWDPKRWRPFSH--PTRQLDTVKFIEQVV-ADESEMECSSILNW--HLHLD-----A--------------
>GT43|AAL49771.1|Streptophyta_Viridiplantae Arabidopsis thaliana;IX14H;Probable beta-1,4-xylosyltransferase IRX14H (EC 2.4.2.-) (Protein IRREGULAR XYLEM 14 homolog) (Xylan xylosyltransferase IRX14H)
VVTPTYV-RTQLHLTGMHSLMLVP-YD--LVWIVVEAGGNE-TASFIAKSGLKTIHLGFDQKMPDRHTKMRLHALRVVREKLDGIVMFADDSNMHSMELFDEIQTVKW----FGALSVGILAHSSKLVGWHAKKTAVYIDEKS----KMEWSGFVLNSRLLWKESLDDPAWV--KDLSLAEIESPLSLV-KDPSMVE-RRVLLW--WLRVE-----AR-------------
>GT43|CAB16800.1|Streptophyta_Viridiplantae Arabidopsis thaliana;IRX14;Probable beta-1,4-xylosyltransferase IRX14 (EC 2.4.2.-) (Protein IRREGULAR XYLEM 14) (Xylan xylosyltransferase IRX14)
-VTPTYV-RTQLHLTGMHSLMLVP-YD--LVWIVVEAGGNE-TGLIIAKSGLRTIHVGIDQRMPDRSVFMRLQALRVVREELDGIVMFADDSNMHSMELFDEIQNVKW----FGTVSVGILAHSTQLIGWHAGKSAVYIDDVQ----KLEWSGFVLNSRLLW-EEAENPEWV--KDFGNEGVESPLSL-LKDPSMVE-RQVLLW--WLRVE-----AR-------------
>GT43|XP_011626438.1|Streptophyta_Viridiplantae Amborella trichopoda;-;probable beta-1,4-xylosyltransferase IRX9H
IVTPTY-NRAQYHLNRAHTLKLVP-PP--LLWIVVEMPSME-TAEILRKTGVMYRHITCNKNSTDRGVHQRNTALEHIERHLDGIVYFADDDNVYSLELFKRMREIRR----FGTWPVGMLAQGSQVVGWHTNEKSKRLRRF-----HVDMSGFAFNSTILWDPKRWHPTSD--PVRQLDTVKFIRQIV-EDESQMECSRIMVW--HLHLE-----A--------------
>GT43|AAF50082.1|Arthropoda_Metazoa Drosophila melanogaster;B3G2P;Galactosylgalactosylxylosylprotein 3-beta-glucuronosyltransferase P (EC 2.4.1.135) (Beta-1,3-glucuronyltransferase P) (Glucuronosyltransferase P) (GlcAT-P) (UDP-glucuronosyltransferase P) (DmGlcAT-BSII)
IITPTYRRPELELTRLGYTLKHVV--N--LLWLVIEDANNPLVGHTLDRIGVPYEYMPMPEKYKPRGVSNRNRGLEYLRE-TEGVLYFADDDNTYDISIFEQMRYISK----VAMWPVGLVTKKLVGYYDGWIGGRK----------YPDMAGFAVSK-FLKERPNAQPFKP----GYEEDGFLRSLALDDEIELLACRDILTW--HTQTK-------------------K
>GT43|CAE17283.1|Chordata_Metazoa Gallus gallus;-;Galactosylgalactosylxylosylprotein 3-beta-glucuronosyltransferase (EC 2.4.1.135) (Fragment)
VITPTYTRPVKELTRLANTFLHVQ--N--LHWVVVEDSPTNLVSNLLEKAGLNFTHLETPKSLKPRGTLQRNLGLHWLRDSAPGVVYFADDDNTYSLELFEEMRYTRR----VSVWPVAFVGGKVVGWKTVFDPNRP----------FADMAGFAISK-LILEKPQASKLEG-VKGGYQETRSAEGISDYGGWSPKQCTKVLVR--HTRTE-------------------R
>GT43|EFX82059.1|Arthropoda_Metazoa Daphnia pulex;-;Galactosylgalactosylxylosylprotein 3-beta-glucuronosyltransferase (EC 2.4.1.135) (Fragment)
LVTPTYRRPEIDLTRLAQTLLNVP--A--VHWIVVEDSSSPAIASLLKRYGIPHTHLQMPEKYKPRGVANRNAALDW---VKSGVVYFADDDNTYDIRLFEEMRFTKK----VSMWPVGLVTKLVVDFFDGWMANRK----------FPDMAGFAVSQ-LVLEKSDVYPYVP----GHEEDGFLKKLDITPDIEPKACTQIFVW--HTQTK--------------------
>GT43|XP_001747805.1|Salpingoecidae_Choanoflagellida Monosiga brevicollis;-;Predicted protein
LITATYQRETFDLTRLCQTLLLVP--R--VHWIVIEDAASPHVGEFLAECGVPYSHLATP----PNGTVNRQIGCFEHRLGGEGVVYFADDDNTYSIELFKRMRNVHT----IGVWRVGFLGRKLTGWHVGWAPDRP----------YPDMASFAFSR-LLEQR-KVEPIQA-PL-GQLETTFLEQLLGPDKLEVLDVKRLLVW--HTRTE-------------------R
>GT43|XP_005271563.1|Chordata_Metazoa Homo sapiens;B3GA1;Galactosylgalactosylxylosylprotein 3-beta-glucuronosyltransferase 1 (EC 2.4.1.135) (Beta-1,3-glucuronyltransferase 1) (Glucuronosyltransferase P) (GlcAT-P) (UDP-GlcUA:glycoprotein beta-1,3-glucuronyltransferase) (GlcUAT-P)
VVTPTYSRPVKELTRMANTLLHVP--N--LHWLVVEDAPTPLTARLLRDTGLNYTHLETPRNYKPRGTMQRNLALRWLRETQPGVVYFADDDNTYSLELFEEMRSTRR----VSVWPVAFVGGKVVGWKTVFDPHRP----------FADMAGFAVNR-LILQRSQAYKLRG-VKGGYQESSLLREL-VTLDLEPKACTKILVW--HTRTE-------------------K
>GT43|XP_012147670.1|Arthropoda_Metazoa Megachile rotundata;-;PREDICTED: galactosylgalactosylxylosylprotein 3-beta-glucuronosyltransferase P-like isoform X3
IITPTYRRPEIELTRMSHTLMLVK--N--VHWLVIEDATTKQVTRLLERTGLNFEHLPMPEKYKPRGVSNRNRGLQWIRANTNGVFYFADDDNTYDISLFNEIRKTKK----VSMFPVGLCTKKFVGFYDGWIAGRK----------FPDMAGFAVSK-FLHQRPNATPF----KAGYEEDGFLKSLAFEPDIEFLACTKVLAW--HTQTK-------------------K
>GT43|AAF52795.2|Arthropoda_Metazoa Drosophila melanogaster;B3G2S;Galactosylgalactosylxylosylprotein 3-beta-glucuronosyltransferase S (EC 2.4.1.135) (Beta-1,3-glucuronyltransferase S) (Glucuronosyltransferase S) (GlcAT-S) (UDP-glucuronosyltransferase S) (DmGlcAT-BSI)
FVTPTYPRREIELTRLAHTLLHIP--R--LHWLVADDQENDYMDTLLYRFGMPFTHMPMPSKFRPRGVANRRAALQWIRQHTNGILYFGDDDNTYDLRLFSEIRKTQR----VSMFPVGLIADKVVAFLDSWVAGRR----------WPDMAGFAVNE-YMAQYPYVNPYK----PGYEEDLFLRSILQMNLIEPRGCTEILVW--HTQTK-------------------S
>GT43|AAL57718.1|Chordata_Metazoa Homo sapiens;B3GA2;Galactosylgalactosylxylosylprotein 3-beta-glucuronosyltransferase 2 (EC 2.4.1.135) (Beta-1,3-glucuronyltransferase 2) (GlcAT-D) (UDP-glucuronosyltransferase S) (GlcAT-S) (Glucuronosyltransferase S)
AITPTYSRPVKELTRLANTFRQVA--Q--LHWILVEDAASELVSRFLARAGLPSTHLPTPRRYKPRATEQRNAGLAWLRQRQPGVLFFADDDNTYSLELFQEMRTTRK----VSVWPVGLVGGKVVGWYTGWRADRP----------FADMAGFAVSQ-VILSNPKAVKRRG-SQPGMQESDFLKQITTVEELEPKACTKVLVW--HTRTE-------------------K
>GT43|NP_001003454.1|Chordata_Metazoa Danio rerio;-;Galactosylgalactosylxylosylprotein 3-beta-glucuronosyltransferase (EC 2.4.1.135)
AITPTYSRAVKELTRLANTFRQVP--Q--FHWIVVEDANTELVSRFLARCGVRYTHLFTPRRFKPRATEQRNLALGWIRG-DKGVVFFADDDNTYSLELFEEMRSTRR----VSVWPVGLVGGKVVGWYTGWKADRP----------FADMAGFAVNQ-VILSNPRALKRRG-AKPGMQESDFLKQITKVEDLEPKACTQVLVW--HTRTE-------------------K
>GT43|XP_003336238.1|Basidiomycota_Fungi Puccinia graminis f. sp. tritici;-;Uncharacterized protein
--------------------------Q--LIWIVIEDGEANDVAQELAASGLPYIYFGPTHHF---GNAQQNAAYALIHRLQDGIFGHGDDDSNFLPELLVIIWDVQR----IGVWPMGNLGPTLLRWEAGAVQDRK----------FPDNGAFAFAE--LLGSTIMGRYWP-TDISGGENEFIGLIVKKEDIEPLCCH--LAW--HNE----------------------
>GT43|AAH71961.1|Chordata_Metazoa Homo sapiens;B3GA3;Galactosylgalactosylxylosylprotein 3-beta-glucuronosyltransferase 3 (EC 2.4.1.135) (Beta-1,3-glucuronyltransferase 3) (Glucuronosyltransferase I) (GlcAT-I) (UDP-GlcUA:Gal beta-1,3-Gal-R glucuronyltransferase) (GlcUAT-I)
VVTPTYARLVKELVRLSQTLSLVP--R--LHWLLVEDAETPLVSGLLAASGLLFTHLLTPKAQRPRGVEQRNKALDWLRGRTQGVVYFADDDNTYSRELFEEMRWTRG----VSVWPVGLVGGRVVGFHTAWEPSRP----------FPDMAGFAVAP-LLLDKPNAQDSTA--PRGHLESSLLSHLVDPKDLEPRACTRVLVW--HTRTE-------------------K
>GT43|AAN09117.1|Arthropoda_Metazoa Drosophila melanogaster;B3GI;Galactosylgalactosylxylosylprotein 3-beta-glucuronosyltransferase I (EC 2.4.1.135) (Beta-1,3-glucuronyltransferase I) (Glucuronosyltransferase I) (DmGlcAT-I) (UDP-GlcUA:Gal beta-1,3-Gal-R glucuronyltransferase) (GlcUAT-I)
AVTPTYPRPAKELTRLSHLFMLLP--H--LHWIIVEDTNTPLVRNLLDRAGLESTLLKTPSEFKPRGVEQRNLALAWLRNHRHSIVFFMDDDNSYSTELFAEMSKIERGR--VGVWPVGLVGGKVTGFNAAWRPERP----------FPDMAAFAISD-LFIRNPQATSYEV--QRGYQESEILRHLTTRDQLQPLACTDVLVW--HTRTE-------------------K
>GT43|CAE17282.1|Chordata_Metazoa Gallus gallus;-;Galactosylgalactosylxylosylprotein 3-beta-glucuronosyltransferase (EC 2.4.1.135) (Fragment)
VVTPTYARPVKELVRLSQTLLHVP--S--LHWLVVEDSATPLVGGLLASSGLSYTHLPTPPEKRARGVEQRNRALRWLR--ESGVVYFADDDNTYSLRLFQEMRSTRG----VSVWPVGLVGGRVVGFHTAWKPERP----------FPDMAGFAVGP-LLLAHPGARDPEA--ERGYLESSLLGGLVTPAQLEPKACTQVLVW--HTRTE-------------------K
>GT43|XP_004345176.1|Capsaspora_Capsaspora Capsaspora owczarzaki;-;Gactosylgalactosylxylosylprotein 3-beta-glucuronosyltransferase
VITPSKPGPTKDLTRLASTLRQVP--A--LHWIVIEDQPTALVAALLERSGMRYSHLQSEAVS-ARGVEQRNLGIAHLRELDQGVVYFADDDNTYDLRVFEEMRFTQH----VSVWPVGIVGGRVVRWHVGWKKQRQ----------FPDMAGFAIHR-NFINTPGELSRSS--PRGYLESHLLARFVRLAQLEPKACSTILVW--HTRTE--------------------
>GT43|XP_007514541.1|Chlorophyta_Viridiplantae Bathycoccus prasinos;-;Glycosyltransferases (EC 2.4.-.-)
VVTPTYHREKTQLIALQNTLSTCL--G--MIWILVESESRK--SSLVERYEREERPAERVLVKA-RGVAQRNKALDWLEQQ---VVLFVDDDNAYAAEHFVRATKIGK----VGVWPVGFPSKKVVGFRSFWFKPRV----------FNDMSGFGVRH-AL---EKVRDENV--RSGYLEDAFLRSVLRRDNKTSENVSEIFVW--H------------------------
>GT43|XP_011165132.1|Arthropoda_Metazoa Solenopsis invicta;-;Galactosylgalactosylxylosylprotein 3-beta-glucuronosyltransferase (EC 2.4.1.135) (Fragment)
AITPTFARPVKELTRLAQTFLHVS--N--FHWIVVEDAPTALVTRFLETSGLIYTHLATPPNYKPRGVEQRNAALKWLR--DKGVVYFADDDNTYSVKLFHEMEKIQR----VGVWPVGLVGGKVIGFNAAWKPDRP----------FPDMAGFAINE-LLLKHKDAWSYDV--QGGYQESEILRQIVTKDQLEPLACTKVYVW--HTRTE--------------------
>GT43|CAA06741.1|Nematoda_Metazoa Caenorhabditis elegans;SQV8;Galactosylgalactosylxylosylprotein 3-beta-glucuronosyltransferase sqv-8 (EC 2.4.1.135) (Glucuronyl transferase I) (GlcAT-I) (Squashed vulva protein 8) (Vulval invagination protein sqv-8)
FITPTHFRAARDLTRLSYTLSHVP--N--LHWIVVEDSDTPSIAGILKRSKIPNTHLRTPSDYDPRGVEQRNRALLWIQNQKEGVVYFGDDDNTYDLKIFGEMRKVKN----AGVWPVGIVGGNSISHFNAVWKPERP---------FPDMAAFAVNS-LVLSNANALSFDV-PR-GYQESTFLENLGIHRNMEPLACTKVYVW--HTRTE-------------------K
>GT43|CAA15837.2|Nematoda_Metazoa Caenorhabditis elegans;-;Galactosylgalactosylxylosylprotein 3-beta-glucuronosyltransferase (EC 2.4.1.135)
VVTPTYKRITIDMTRLANTLAHVE--N--LHWLVVEDGYVPEVRQMLERTNLSYTYMKTAKGYP-RGWYQRTMALRYIRSSNGAVVYFADDDNAYDVRLFTDIRNVNT----LGVWAVGLVGGQKVTAFNVRWALSRR---------FADMAGFAINK-LIL-NSDAVGTDC-KRGGAPETCLLEDMGLKMDIEPFGATKIMVW--HTKTS-------------------P
>GT43|CAB03531.2|Nematoda_Metazoa Caenorhabditis elegans;-;Galactosylgalactosylxylosylprotein 3-beta-glucuronosyltransferase (EC 2.4.1.135)
VITPTYRRINMDITRLSNTLSHVK--N--LHWIVIEDGVVPAVRAVLERTGLSYTYMKTAQGYP--GWYQRTMALKFIRENREGVVYFADDDNSYDLRLFNDIRNVRK----LGVWAVGFAGGKKVTSFDALWVSKRL---------FADMAGFAVNK-WIL-RTNAVGKTC-NRGGAPETCLLEDLGFDLDIEPFGKREILVW--HTRTS-------------------Y
>GT43|CAB04033.2|Nematoda_Metazoa Caenorhabditis elegans;-;Galactosylgalactosylxylosylprotein 3-beta-glucuronosyltransferase (EC 2.4.1.135)
VITPTYRRITMDITRMSNTLKQIK--N--LHWIVIEDGEVPAVQNVLERSGLPYTYVKTAKGYP--GWYQRDMALKMLRTNGEAVVYFADDDNSYDLRLFDDIRNVKK----LGVWAVGLVGGKKVTSFNVKWEPSRP---------FADMAGFAINK-YIL-RSAAVGPKC-HGSGAPETCLLEKLGFELDIQPFGKEEILVW--HTRTS--------------------
>GT43|CAB05467.2|Nematoda_Metazoa Caenorhabditis elegans;-;Galactosylgalactosylxylosylprotein 3-beta-glucuronosyltransferase (EC 2.4.1.135)
VVTPTYKRITLDMIRLANTLAHVK--N--LHWIVVEDGYVPAVRELLEKTNLSYTYMKTAKGYP-RGWYQRTMALRYIRSSHDAVVYFADDDNAYDVRLFTDIRNVNT----LGVWAVGLVGGHKVTGFNVRWSPNRR---------FADMAGFAINK-YIL-NSDAVGKDC-KRGGAPETCLIEDIGLDLDIKPFGATKIMVW--HTKTS-------------------P
>GT43|CAB05617.3|Nematoda_Metazoa Caenorhabditis elegans;-;Galactosylgalactosylxylosylprotein 3-beta-glucuronosyltransferase (EC 2.4.1.135)
VITPTYKRITLDITRLANTLSQVE--N--LHWIVIEDGEIPNVQNILERSELLYTYVRTASGYP-RGWYQRDMALKLIRTNGEAVIYFADDDNSYDLRLFEDIRNVKK----LGLWAVGLAGGKKVTSFNFKWKSKRR---------FADMAGFAIND-YIL-NSSAVGTEC-KRGGAPETCLLEDLGFDLDIEPFGKEKILVW--HTKTS-------------------Y
>GT43|CEM38452.1|Alveolata_Protista Vitrella brassicaformis;-;Uncharacterized protein
VITPTYRRITRDLTRLFNTFGAAS--N--VHMIVVEDSVTAKVERWLNDSLLLHSHLSSSSGLR-RGAEQRNEAIRLIRDIADAVVYFADDDNAYDIRILHELRKVRN----IGTWPVGLAGASKIKKYNA-WGTGRA---------YPDTAGFGLHR-HFLQDPPLLKIRS-KK-GRLESDFLEQTNVSKDIEPLACTKIYTW--HVKT---------------------
>GT43|EGU10941.1|Basidiomycota_Fungi Rhodosporidium toruloides;-;Putative glucuronosyltransferase sqv-8
IVTPTHDQLTYNFLYLAHALAHSPPSR--ILWLVIEDGPDPSISSLLSSLPIAHRYWQTPSSFE-RGLVQRNAALDYIDAS-QGVVYFADDDNAYRPELLNYLSKVPR----DGVFPVGNTGYEEGVVEIEQWFCRRR---------WNDMAGLAFHS-LLRPPSGPIDWDQ-PREGFLETDLLTSLELHSNLYTFPNDRIHVW--H------------------------
>GT43|KIH60643.1|Nematoda_Metazoa Ancylostoma duodenale;-;Galactosylgalactosylxylosylprotein 3-beta-glucuronosyltransferase (EC 2.4.1.135)
FVTPTSFRPAKDLTRLSYALSHVP--N--LHWIVIEDASSDSVARILKRSQLPHTHLKTPTNMKPRGVPQRNAALAWIRTQKTGAVYFGDDDNTYDLRLFDEIRSIDA----VGIWPVGIVGGGTVIGFNAVWKPERP---------FPDMAAFAVNT-LVTANREASSYDV-PR-GYQESHFLTGLGLSRDLEPKACTRVYVW--HTRTE-------------------K
>GT43|KNZ51833.1|Basidiomycota_Fungi Puccinia sorghi;-;Uncharacterized protein
---------------------QKR--Q--LIWIVIEDGEANDVAQELAGSDLPYIYMGPTHHY---GNAQQNAAYALIHRLGHGPVLSIDDDSNFLPELLVIIWDVRR----IGVWPMGNLGPK--THTLIRWEADRQ---------FPDNGAFAFAE-LLGSTIKGYPTDI-SGG---ENEFIRLIVSKKDLEPLCCH--LAW--H------------------------
>GT43|NP_001299964.1|Nematoda_Metazoa Caenorhabditis elegans;-;Galactosylgalactosylxylosylprotein 3-beta-glucuronosyltransferase (EC 2.4.1.135)
VVTPTYKRMTIDMLRMANTLSHIK--D--LHWIIVEDGNVPAVRDILERTKLPYTYMKTILGYP-RGWYQRTMALKYIRSNEEGVVYFGDDDNSYDTRLFTEIRNVKT----LGIWAVGLVGGGKVTAFNVKWNPKRR---------FADMAGFAVNK-VVL-NSDAVGTAC-KRGGAPETCLLEDMGLERDIEPFGKREILVW--HTKTS--------------------
>GT43|XP_003108547.1|Nematoda_Metazoa Caenorhabditis remanei;-;Galactosylgalactosylxylosylprotein 3-beta-glucuronosyltransferase (EC 2.4.1.135)
VVTPTYKRMTIDMLRMANTLSHVK--D--LHWIVVEDGNIPAVEEILKRSNLPYTYMKTAVGYP-RGWYQRTMALKFIRSNEEGVVYFGDDDNSYDIRLFTEIRNVKT----LGIWAVGLVGGGKVNAFNVKWNPKRR---------FADMAGFAVNK-VVL-NSDAVGTSC-KRGGAPETCLLEDMGLERDIEPFGKEKIFVW--HTKTS--------------------
>GT43|XP_004989824.1|Salpingoecidae_Choanoflagellida Salpingoeca rosetta;-;Uncharacterized protein
VVTPTYTRKSLDLTRLKQALSQKH--N--LLWIVVEDSDTDLVTHFFDSCEVPYVHLKEEHPYK-----QRNLGISYIRSMSNSKVYFADDDNAYDVRLFDEIAKVKR----VGVWPVAYSGAGTITGF-ASWVTEKR---------FPDMAAFAVSE-FFLRDKPVL-TPL-AASGTGEAAFLEATGLDTDLEPLACTKVYVW--HVKT---------------------
>GT45|AIF03053.1|Euryarchaeota_Archaea uncultured marine group II/III euryarchaeote KM3_160_F12;-;Methyltransferase FkbM family protein
ITASMAAVPWETLQRVVESLLPQV-DC--LNIY-LNEWE-S-IPEFL-N--YPKINAVMSQNEADLGDRGKFYWCEQ----IRGYHLTVDDDILYPPDYVGKILFNLRRKAVSYHGSIL--NYVYTKKNNKLTHFARDAPKDMEV--ALIGTGVLAYDANEL-AV---DFSKFKSNYWADGWFSLQARNANFRCIV-IR-------HKKDW---LKPLPTE----------
>GT45|CCI46596.1|Stramenopiles_Protista Albugo candida;-;WD_REPEATS_REGION domain-containing protein
VVVSLTTSPKMKILQTIQSLVNQSLDR--IYLN-IPRYD-EVIPPQVLA--LAPLVTINRCE--DEGPATKLLGANV----SDTLIITVDDDFLYPRDLVRSLAWEATLEDVGVCGGMVPIFWAVGIIPAYVPYFMRPYGRIVDI--LQACCGNAYRRGFFRNVE---ELSDISSDTVDDIWLAGYAVENRKSAII-SK-------REPEW---KAHESMPSL-SLSQFN-
>GT45|CDQ32850.1|Firmicutes_Bacteria Virgibacillus halodenitrificans;-;hypothetical protein BN993_02277
VVAGVASFKAEVFKESIESVKDQF-DH--IYVY-LNDYD-S-TPDFL----LHDKFTVFHGV--DYTDNGKFSLGDI----GSCYFFTLDDDIAYPGNYVERMVESIKKNKVCVHGSVLPKWPWYFERYAL-YPFQSSLSSDKFV--NLIGSGTFAFHTD-FLKV---EFSDFLPSIMVDLQFSISAKNQNIPLVS-IS-------RPKFW---LKALAQGEG-LYQSFTL
>GT45|WP_014391187.1|Proteobacteria_Bacteria Pasteurella multocida;-;Heparosan synthase A
VYINICSIPSIQLQYTIGVLKNQC-DH--FHIY-LDGYP-E-VPDFIKK--LGNKATVINNE--SIRDNGKFILKEN----KDGYYITCDDDIRYPADYINTMIKKINKKAAGLHGVIFPSRVKYFSSDRIVYNFQKPLENDTAV--NILGTGTVAFRVSIFNKF---SLSDFEHPGMVDIYFSILCKKNNILQVC-IS-------RPSNW---LTEDNKNET-LFHEFQ-
>GT45|XP_005709939.1|Rhodophyta_Protista Chondrus crispus;-;Uncharacterized protein
VTVSIASQWIEALHSSVHSLASQV-DH--MNVY-LNGYD-S-VPPFLMA----PYVTITSKG--DIGDIGKFWCNDL----TSEFHLTADDDIFYPPDYVEKLLSFWHSSVVGVHGILTPSRGGYYGS-REVWMATESVKKPVNV--HIIGTGTMLYRAKDIGTI---DVADFKQPNMADVWFGLLTQKLKLPMMV-LP-------HPGGW---IREVTFEDS-IYKKST-
>GT49|AAC17758.2|Nematoda_Metazoa Caenorhabditis elegans;-;B3GNT1, Beta-1,3-N-acetylGucosamiNylTransferase 1, homolog
VTLAVHTAE-MEMIENKPENWDGPISF--GLFIDFHSRQI-LDYVAKV-YQKVTVHFAFRLSPFYPSNLMRNIARKGA---KSDIHFIVDGDMIMSDGFAEKIKP-IAKVLVRRFETNE-T--TIPHNHIELKNAIENKQVFQFHHRWFAVSNETDEIAWEIPYSSSLWEVQVNDLYNADYFPARIKVMQSLVYSL-CRANYTFNVHKGIKLGDTNFSKSVIASKRN----
>GT49|AAC39538.1|Chordata_Metazoa Homo sapiens;B4GA1;Beta-1,4-glucuronyltransferase 1 (EC 2.4.1.-) (I-beta-1,3-N-acetylglucosaminyltransferase) (iGnT) (N-acetyllactosaminide beta-1,3-N-acetylglucosaminyltransferase) (Poly-N-acetyllactosamine extension enzyme) (UDP-GlcNAc:betaGal beta-1,3-N-acetylglucosaminyltransferase 1)
VILATHSVD-NLHLSGLLERWEGPLSV--SVFAATKEEAQLATVLAYALSRAVAMHLVCPSRYEYPNNLLRNLAREGA---N--YALVIDVDMVPSEGLWRGLRE-MLWALVPAFEIRRAR--RMPMNKNELVQLYQVGEVRPFYYGWVNLPEESLLRAYVVPWQDP-WEPFYKVPTFDERFRQYGFNRISQACEL-HVAGFDFLVHKGFKEALKFHPQKEAEQHNKILYP
>GT49|AAF47166.1|Arthropoda_Metazoa Drosophila melanogaster;-;GH04269p
VCLATQSVE-RNSLPQVAANWQGKMSV--ALFAAGPEEFVVLQYFVTYMRREATFHLLTPRDFDYPQNHMRNLARKGC---QTKYVFLTDIDIVPSTNSVPQLNH-FFTAYVPTFEIDVRA--TFPRSKNALVRLIRKGLARPFHEKWLSPNTNTEVSSHVVNFEFL-YEPFYNAPAHDERFLGYGFTRNSQVYEM-HIAGYQFTGHWGLQRKQARPAWREQQNANRRKF-
>GT49|AAF99911.2|Nematoda_Metazoa Caenorhabditis elegans;-;B3GNT1, Beta-1,3-N-acetylGucosamiNylTransferase 1, homolog
ITLASHTSD-MLTLEKMTSMWDGPISV--GIFIDFHSSQA-LEYLAEV-HRKMTIHFAIRQSAFYPSNLMRNLARQGA---KSDIHFIMDADMIVSEGFARKLKK-VAKVLARRFESVNGT--YLPRTHFELKQSMAYSKTFEFHHRWFEVSKQSTSVTMEIPFAGYEWEVQVNDPYNAAYFPSRIKVMHSLIYAL-CRAGYTFDVHEGIKHTNTIYSKAHQEYAMDIAGP
>GT49|AAL49129.1|Arthropoda_Metazoa Drosophila melanogaster;-;RE56074p
VTYTTNDFT-FDNLEMVVSRWRAPVSF--AIHTPGYDLNTTLDAIRYVRNKDVSFHVYFPNQHMYPINVGRNIARLAT---NTHFIFACDIELYPSVGFVDQFLD-MVQVYPPVFEIETGA--KVPVDKDELLALYRKQQAQVFHLKWLNRTSDDHLHFSKRKWKRA-WEPFYTEPLFDERVTWEGQNKRIQVYAM-CLLDYEYLVHSGIKQSKADSTRLQYAEMTKFIKG
>GT49|AAN10556.1|Arthropoda_Metazoa Drosophila melanogaster;-;RE67001p
ITYTTHDYT-FDNLVPLLERWNAPVSI--AMHAPGTDFQPTLDSIRYLRERATTFHIYFGTKHIYPVNVGRNIARDSA---LTHFILASDIELYPNPGLVKKFLE-MIKVFPAIFEVEENS--PVPHDKTELQEFLRTGKAIPFHKRWMSANETDELSFHRTGYYVH-WEPIYADPHYDERLSWEGKDKMPQGYAL-CVMDYEFLVHKGIKVLKKDNRRAMLSKTNQLIRG
>GT49|ACJ23454.1|Arthropoda_Metazoa Drosophila melanogaster;-;FI06150p (Fragment)
VTYTTHDYT-YDNVVPLLERWRSPLSL--AIYAPGTDFEPTIHSILYLLQRQCSIHLYFDVEHLYPVNMGRNVARRAS---LTHYVLASDIELYPTPGLVPDYMH-FLTVHVRIFEVMANV--SVPNTKPELQEMLKSGEAVPFHMDWINASVVSVFNGHRSENNNN-WEPIFEDPPYDERLTWEGQDKMTQAYAM-CVLDYEFLVHKGIKQPGNRKEIFPQARTNGLIDG
>GT49|BAC04675.1|Chordata_Metazoa Homo sapiens;LARG2;LARGE xylosyl- and glucuronyltransferase 2 (EC 2.4.-.-) (Glycosyltransferase-like 1B) [Includes: Xylosyltransferase LARGE2 (EC 2.4.2.-); Beta-1,3-glucuronyltransferase LARGE2 (EC 2.4.1.-)]
VTLVAQSMD-RQMLEALCRHWPGPMSL--ALYLTDAEAQ---QFLHFVEARQVAYHVVYREGPLYPVNQLRNVALAQA---LTPYVFLSDIDFLPAYSLYDYLRA-SIEALVPAFETLRYRF-SFPHSKVELLALLDAGTLYTFRYHWREAQAP-----YRVQWAAN-YEPYVDCPRYDPRFVGFGWNKVAHIVEL-DAQEYELTIHLPH---------------------
>GT49|CAA07571.1|Chordata_Metazoa Homo sapiens;LARG1;LARGE xylosyl- and glucuronyltransferase 1 (EC 2.4.-.-) (Acetylglucosaminyltransferase-like 1A) (Glycosyltransferase-like protein) [Includes: Xylosyltransferase LARGE (EC 2.4.2.-); Beta-1,3-glucuronyltransferase LARGE (EC 2.4.1.-)]
VTLVAQSMD-RQMLEAICKHWEGPISL--ALYLSDAEAQQFLRYAQGLMS--VGYHIV------YPVNLLRNVAMKHI---STPYMFLSDIDFLPMYGLYEYLLD-LANAMIPAFETLRYRL-SFPKSKAELLSMLDMGTLFTFRYHWRTAT------PYRVEWEAD-FEPYVDCPEYDRRFVGFGWNKVAHIMEL-DVQEYEFMIHMPHA--PSFDITKFRSKQYRILKG
>GT49|CAA91997.4|Nematoda_Metazoa Caenorhabditis elegans;LGE1;Glycosyltransferase-like protein LARGE (EC 2.4.-.-)
-CMVTQSKD-RNHFLESANAWRHPIST--AVYGKDKDL---LDIAKAVTE---TIHLVF-----YPINFLRNVAIEHA---NCKYILMTDVDFVVLGDIIDQTGN--LKVLVPALEMTNLS--NFLSRKDLVIEHLLNKTIQTFRETWIKSN------TYMVNYEKN-YEPYFEEPFYDQRFGGFGWNKVTHVMQL-KMMNYKFMIHQNHNASKSLKRWRRDPYQKCLLK-
>GT49|CAB04495.1|Nematoda_Metazoa Caenorhabditis elegans;-;B3GNT1, Beta-1,3-N-acetylGucosamiNylTransferase 1, homolog
VTLAIHTSD-VEVVEKKPSNWDGPISF--GMFVDYHSQKA-LEYVAML-HGEVTVHYVFRTSPSYPINLMRNVARRGA---TSDLHLIVDADMTMSSDFARKVKP-IAKVLVRRFETNEDE---IPLEVEQLKMGFENQKVFEFHHNWFHASKTENEVAWEIPYSNA-WEVQVNDMYNAEYFPSRIRDMQSLIYGL-CRANYTFNVHQGIKEDDTMYSKAHSKYGRNRAFP
>GT49|CAB05464.2|Nematoda_Metazoa Caenorhabditis elegans;-;B3GNT1, Beta-1,3-N-acetylGucosamiNylTransferase 1, homolog
VTLAIHTPE-VQLLGNKPLNWDGPISF--GLFVDFHSQKA-LNYISML-HKRMTVHFAFRISPSYPINLMRNIARRGA---KSDLHLIIDTDMMMSTNFAKMVKP-IAKVLVRRFETNENE---LPMSFGDLEEGIENHKTFQFHHKWFERSHASNDVAWEIPYTND-WEVQINDPYNVEYFPSRVKDMQSLIYKL-CRANYTFNVHKGIKEDDTMYSKAHTKQGRLRTLP
>GT49|CAB05626.2|Nematoda_Metazoa Caenorhabditis elegans;-;B3GNT1, Beta-1,3-N-acetylGucosamiNylTransferase 1, homolog
ITLAVHSPE-VGEIENKPFNWDGPISF--GLFIDFHSQHA-LNYISML-HRRTTVHFAFRISPSYPINLMRNIARRGA---KSDLHLIVDTDMVMSTNFAKMVKP-VANVLVRRFETNE-T--ELPLNLDELEQGLLNENTFEFHHSWFENSYASEETAWEIPYTSD-WEVQINDPYNIEYFPSRVRDMQSLIYKL-CRANYTFNVHKGIKEDDTMYSKVVTATKKMRTLP
>GT49|CAB07595.1|Nematoda_Metazoa Caenorhabditis elegans;-;B3GNT1, Beta-1,3-N-acetylGucosamiNylTransferase 1, homolog
VTLATHTAD-METVENMTFLWDGPISI--GIFVDYHSYN-VLEYLAEV-HRRMNVHFAFRRSPFYPSNLMRNIARKGA---QTDLQFIMDGDMVPSEGFATKIKR-IAKVLARRFETSDTA--EIPRDHLKLLKSKKLHKTFEFHHRWFRTSIHSGVVTKEVAYPGYLWEVQTNDPYNADYFPSRIKVMHSLVYAL-CRAGYTFDSHRGIKHTNTIYSKAHQEYAMKEAGP
>GT49|CAE17756.1|Nematoda_Metazoa Caenorhabditis elegans;-;B3GNT1, Beta-1,3-N-acetylGucosamiNylTransferase 1, homolog
ISLVLHTSH-FREIEGQCSNWNGPISI--SLFVDRTSSEA-VDYLHEV-HNQLSVHVVYRMSPFYPINVMRNVARKGA---LSYIHMTADVEMMFSDGFALKMKP-LAKLLVRRFEVDNKA--HVPADNKELFLMIKAFRAFEFHHKWFRMSKNQTEAAWKIDYKSSSWEAQLKDPYNPEYIPTRIRDQQSLVYEL-CRANYTFNVHRGVKTKETNLSSAVLTQKRTRSYP
>GT49|CAE17897.1|Nematoda_Metazoa Caenorhabditis elegans;-;B3GNT1, Beta-1,3-N-acetylGucosamiNylTransferase 1, homolog
VTLAVHTSE-MKAIEKKPLNWDGPISF--GLFIDFHSRQ-VLEYISEV-HREVTVHFAFRLSAFYPSNLMRNIARQGA---KSDIHFIADGDMVMSEGFAMKIKP-IANLLVRRFETNE-T--TIPRDHKQLQESIKNKKVFQFHHKWFAVSNNTDRITWEIPYSSSLWEVQVNDLYNADYFPARIKVMQSLVYSL-CRANYTFNVHEGIKLDDTGFSKAHSKYGKTRAYP
>GT49|GAN07588.1|Mucoromycota_Fungi Mucor ambiguus;-;Uncharacterized protein
VSLISQSVN-RDTFKKAIEAWTGPISV--AIYLTSTDID---ELISYFENYSVTIALVKP----YPINHLRNIAITES---SADYIFVIDADFTPSSNLRSRLIP-FIMAWVPCFEIYSDL--PMPQTYNELRQLVGRNIA---YITVMDRPLLHGNPAYEVCFESQ-WEPYYSAPLYDARFKNQGGDKQSHALHL-NAERYRFMIHKDHSALPGGGFEKSQKATNWNYFG
>GT49|KDQ27618.1|Basidiomycota_Fungi Pleurotus ostreatus PC15;-;Glycosyltransferase family 49 protein
ITITTLTSN-RSVFARLVEHYQGPVSV--TIHIKNETEHILLDSLHGL-YSAVDVHLVIDNFER--FNMWRNVARLFA---RTDYIMMLDVDFALCTDFRRAIRK-LKEAFVPAFEYTNASDGTFPRDKDSLLPLVDSKRIGMFHASYYTS---KPGEYKVTQYQSA-YEPYVEGPPWDERFVGYGANKAACLFEM-YISGVSFIIHQNH---DYEETARKNERYNRKIY-
>GT49|XP_001868312.1|Arthropoda_Metazoa Culex quinquefasciatus;-;N-acetyl lactosaminide beta-1,3-N-acetyl glucosaminyl transferase (N-acetyllactosaminide beta-1,3-n-acetylglucosaminyltransferase)
VCLATQSLE-KYSLVQVSHHWSGPISA--AIFAAGNDELYLLQYLSYLRNREVSFHLALPKERAYPQNHLRNVARKGC---QSTYVFLTDVDIIPSVNFAEHLDK-FLRAFVPTYELDERV--RFPRNKTDLIRLANKGLARPFHHKWQADIFDGETRSHVTNFEFL-YEPFYTVPPHDERFLGYGYTRNTQVYEM-FVAGYQFTVHWGLQNKKSRPAWRERQNVNRKYF-
>GT49|XP_007497696.1|Chordata_Metazoa Monodelphis domestica;-;PREDICTED: LOW QUALITY PROTEIN: glycosyltransferase-like protein LARGE2
VTLVAQSMD-RQMLEALCRHWPGPMSL--ALYLSDAEAQ---QFLRFAQARRVAYHIVYREGPLYPVNLLRXVALGQA---RTPYVFLSDIDFLPAFSLYDYLLG-LATALVPAFETLRYRL-NFPTSKKELLALLDAGSLYTFRYHWREAQAP-----YRVEWAAD-YEPYVDCPRYDPRFVGFGWNKVAHIMEL-DAQEYEFAIHLPHAPSLDISRFRSSPYRRQALKG
>GT49|XP_011399457.1|Chlorophyta_Viridiplantae Auxenochlorella protothecoides;-;Glycosyltransferase-like protein LARGE2
VTLVTQSFE-RYMLEGQCDVWSGTISA--AVYIALVGGKAVS---VELNSIASRVVAAFRQFH-YPVNSMRNRALANA---KTDVVLLLDVDFWPSAELVEVMAQ-PRKAIVPAFEVARGA--EL-GGKAAAAAMSRDGRLKPFHTDWLTA------RPYHIRYEEG-YEPYVFVPWYDERFVGYRKNKVVHLLHL-AQQGTLFTVHSPH---PRARTWKVTRTGLWDQL-
>GT49|XP_012747914.1|Amoebozoa_Protista Acytostelium subglobosum LB1;-;hypothetical protein SAMD00019534_122450
VTIVTQSVD-RDKIALMADRWRAPISV--ALLI--RDANVDLPKLDKILAREADIHLFH-----YPVNNLRNLAITSS---RTDFVLLMDADFIIPAGTHDYLIP-YIHAFVPAFSSSEPS--LLPNDKASLLELIQKGLVSPSNLEWYKESK-----AYQLDYRWI-YEPYLSQTLFDERFKGYGFDKNSQVFAM-AVMGFKFIIHINHEQSKWDGEIVEQQDALRVLCG
>GT49|XP_310080.3|Arthropoda_Metazoa Anopheles gambiae;-;AGAP009403-PA (Fragment)
ITYTTHDYT-FDNLVPLLERWNAPVSL--ALHAPGTDFVPTINSIKYLRDRQVTFHIYFSSKHIYPVNVGRNIARDAA---MTHFLLASDIELYPNPGLVHKFLE-MIKVFPPIFEVDNNS--PVPRDKAELQELLRSGKAIPFHKRWIAANETDDLGFHRIGYFVH-WEPIYADPHYDERLSWEGKDKMTQGYAL-CVLDYDFLVHKGIKVLKKDPKRAMLAKTNQLIKG
>GT54|AAF49706.1|Arthropoda_Metazoa Drosophila melanogaster;-;Uncharacterized protein
FVIGVPTVLRNYVLQTVDCLIRRTPEQRDLVIFVGETKLQFAKFIVRELRVNSHMQADVIAPPLRVQWRTKQNLDYIYLMSRGLYYLQLEDDVMANVGFMDYIQKFAVLHGSIDWIVMSF---------------------------SELGFGKLFRTSVLSSFV---AYLKLYNDQPIDWLLQSFVTLQSCRWDSSSQSQ-FQ--HMGAQSSLADKQQYQKD-AF----F
>GT54|AAL48961.1|Arthropoda_Metazoa Drosophila melanogaster;-;RE37593p
IVLGVPTVRRSYLLGTLHNLIENNDEEQNLIVYIGETDMESVQLIARQIESSDHVESDIIAPAPRVKWRSKQNLDFAYLMAKGTFYVQLEDDILTKRQFITTMKKFALIKDQPEWFVLDF---------------------------CQLGFGKMFKSAELPYLI---TYFQMYNDKPVDWLLTYFIESKVCRTDKDRKSL-FQ--HIGTSSSLKGKVQKLKV-KQ----F
>GT54|BAA86388.1|Chordata_Metazoa Homo sapiens;MGT4A;Alpha-1,3-mannosyl-glycoprotein 4-beta-N-acetylglucosaminyltransferase A (EC 2.4.1.145) (N-glycosyl-oligosaccharide-glycoprotein N-acetylglucosaminyltransferase IVa) (GlcNAc-T IVa) (GnT-IVa) (N-acetylglucosaminyltransferase IVa) (UDP-N-acetylglucosamine: alpha-1,3-D-mannoside beta-1,4-N-acetylglucosaminyltransferase IVa) [Cleaved into: Alpha-1,3-mannosyl-glycoprotein 4-beta-N-acetylglucosaminyltransferase A soluble form]
IVMGIPTVKRSYLIETLHSLIDNYPEEKLVVVFIGETDIDYVHGVVANLEKESEISSEVISPPERVRWRTKQNLDYCFLMMKGIYYIQLEDDIIVKQNYFNTIKNFALQLSSEEWMILEF---------------------------SQLGFGKMFQAPDLTLIV---EFIFMYKEKPIDWLLDHILWVKVCNPEKDRPSL-FQ--HVGLHSSLSGKIQKLTD-KD----Y
>GT54|EAW91438.1|Chordata_Metazoa Homo sapiens;-;hCG1797874, isoform CRA_a, partial
------------------------QAEQKTLVHLADSDLTWLRETLAHISSLSQILKLLIHASSHGEFYSKQNVDHAFLMSFSDYFLLIEDNVFFAPNFVTHIHSRVTTMKSNSWVLMEF---------------------------SNMGFGKLFHSRDLPLLA---HFLLLYKEKPLDSLISHFHTLLV----------------------------------------
>GT54|EAW91455.1|Chordata_Metazoa Homo sapiens;-;hCG1811644
-------------------------------------------------------------------------------MNLSDYFLLLEDHIHCTPKFAAAISSALSAWKELPWVILEF---------------------------SHLSIGKVFCTSDFSRLN---TFFLLHKDTPTHLLLSEFRLLLA------SPSV-FH--HTGNYSVFDD---------------
>GT54|KDR10509.1|Arthropoda_Metazoa Zootermopsis nevadensis;-;Alpha-1,3-mannosyl-glycoprotein 4-beta-N-acetylglucosaminyltransferase B
-VLGIPTVKRSYLLATLQNLIDSTEQEAALVVFIAEVDQEYVLQVARQIEAQSRVESEVISPPARVRWRTKQNLDFAFLMMKATFYVQLEDDILAKKNFISTMKNYALQKISSPWFVLEF---------------------------CQLGFGKMFKCVELPWLV---QFFLMYNDKPVDWLLDHLIHTKICSLDKDKPSL-FQ--HIGTHSSLKGKVQKLKD-KQ----F
>GT54|KEY73592.1|Ascomycota_Fungi Stachybotrys chartarum;-;Uncharacterized protein
--IGIPSIKRQFLRRTIASLFDTESDERKYAVLIADDHADWLGCLADEIMVYESLPS-------HVR------HDYANLIERGSFFTLIEDDTIASRSWLRRLRQGLIENSNRDWLYIRF---------------------------YSETYG--WNNEEIPIYI---RNIIFYVSLGIILSALDFRRSLSSAGVHNMPKR-FR--HVKAFVKFKGLFEAVTD-KF-----
>GT54|KHN88735.1|Nematoda_Metazoa Toxocara canis;-;Alpha-1,3-mannosyl-glycoprotein 4-beta-N-acetylglucosaminyltransferase A
LVIGIPTVARSYLLPTLQSLISGNAEEKAVVVLIADAHSQFVTEQVRNVRSEAEIDSHLIVPPRRMYWRTKQNLDYVFLMLRGEYYLQLEDDVLTRPGFVSRIHNFTAQRSAESWLMIEF---------------------------STLGFGKLFRSSDLPLLA---QFIVLHREKPVDWLLDLIFVNRYCHPEKSRPSL-FQ--HVGVHSSLAGKLQILRE-RD----F
>GT54|NP_001338211.1|Chordata_Metazoa Homo sapiens;-;alpha-1,3-mannosyl-glycoprotein 4-beta-N-acetylglucosaminyltransferase C isoform a precursor
LTIGLSSVKRNYLLETIKSIFEQSYEELKSVVHLADFNSSWRDAMVQDITQKAHIIAMVIHAPERVKFRSKQNVDYAFLLNTSDYYVMLEDDVRCSKNFLTAIKKVIASLEGTYWVTLEF---------------------------SKLGYGKLYHSHDLPRLA---HFLLMYQEMPCDWLLTHFRGLLA------KPSL-FQ--HMGYYSSYKGTENKLKD-DD----F
>GT54|NP_463459.1|Chordata_Metazoa Homo sapiens;MGT4B;Alpha-1,3-mannosyl-glycoprotein 4-beta-N-acetylglucosaminyltransferase B (EC 2.4.1.145) (N-glycosyl-oligosaccharide-glycoprotein N-acetylglucosaminyltransferase IVb) (GlcNAc-T IVb) (GnT-IVb) (N-acetylglucosaminyltransferase IVb) (UDP-N-acetylglucosamine: alpha-1,3-D-mannoside beta-1,4-N-acetylglucosaminyltransferase IVb)
-VMGIPSVRRSYLTDTLHSLISESPQEKEVVVLIAETDSQYTSAVTENIKALPEIHSEVISPSPRVRWRTKQNLDYCFLMMKGIYYVQLEDDIVAKPNYLSTMKNFALQQPSEDWMILEF---------------------------SQLGFGKMFKSLDLSLIV---EFILMYRDKPIDWLLDHILWVKVCNPEKDKPSL-FQ--HVGTHSSLAGKIQKLKD-KD----F
>GT54|XP_002501733.1|Chlorophyta_Viridiplantae Micromonas commoda;-;Uncharacterized protein
LVVGVPTAPRDYLTETLETLLDEPDDARHFLVVVMNAKPG-RHEVFDRVRARGSGSSDEFAAKANGHAVRQQTADLATLIDESPYFMFMEDDFRTCAGTMKALTYLVEKADAPQWLGVRF---------------------------SY-GMGVVMRRKDLPPFA---EYLATVSRQPPDILWRE--WVEG-RREDVKWNL-ME--HVGEVSTFAVRPNRPK---------
>GT54|XP_004347921.1|Capsaspora_Capsaspora Capsaspora owczarzaki;-;Uncharacterized protein
LVVGIPTLARSYLSETLRSLIARSQEELDLVIFLADMDKNKAMAIYTQIHPEEYVRDDVITAKKRVKWRSKQCFDFALLMERGDYYLQLEDDVLAADNFASSILAVVDSYMNPPWSMLEF---------------------------SRLGFGKLFRDTELLEMA---AMFRFHYDQPVDYLMTYFIQIKT------KYAL-FQ--HIGTQSTLPGKIQRLTD-PS----F
>GT54|XP_008571505.1|Chordata_Metazoa Galeopterus variegatus;-;PREDICTED: glycosyltransferase 54 domain-containing protein
FALGIPTVNRTYLKQTLTSLLSRTLSEEKVIVSVADSNEDYLNSVVDMITKKKQVKSEVISIPAMESWQIKQVLDFCILMLKAMYYLQLEDDIIAKKRYFTKITDFVHNITSNDWFYIEF---------------------------SILGFGKLFRSEDLPDFV---RFFLMYKDKPIDLLLDDIFQIKMCKPGEAKPSL-FQ--HVGIHSSLPGKEQYLK---------
>GT54|XP_011744983.1|Chordata_Metazoa Macaca nemestrina;-;alpha-1,3-mannosyl-glycoprotein 4-beta-N-acetylglucosaminyltransferase C-like
LTIGISSVQRSYLLDTLQSLFFASLSEQKTLVHLADPDPNWLDQMISNISTLQYVQAVVINTPLHVTFRSKQNMDYAFLMNYSDYFLMIEDDVKCAPGFVSQIATILSAWERKAWVTLEF---------------------------SRLGFGKLFHARDLPCFV---RFLLLYQEMPCDYLLSHFRDLLM------FPSL-FQ--HMGNYSSFEGQLNSLTD-KE----F
>GT54|XP_013053271.1|Chordata_Metazoa Anser cygnoides;-;PREDICTED: alpha-1,3-mannosyl-glycoprotein 4-beta-N-acetylglucosaminyltransferase-like protein MGAT4D isoform X2
LVMGIPTVKRSYLMTTLHSLFYESEEQKNVIIFIAEVNEEYVNSVAESVKSSPEIQSEIVSPPARVRWRTKQNLDYSFLMLKGTFYLQLEDDIIAKPDYIQSIKNFAAVQ-SQEWMILEF---------------------------SQLGFGKLFKSEDLPLIV---EFFLMYKDKPIDWLLDHLLWVKVCNPEKDKPSL-FQ--HMGIHSSLSGKIQNLKD-KD----F
>GT55|ELQ42360.1|Ascomycota_Fungi Magnaporthe oryzae;-;Ankyrin repeat and protein kinase domain-containing protein 1
IVVPCMDED-IATIEGVLSGIPHE--S--LVILVSNSSH--IEAYDEMDAISHRSAIAVHQQDPNGKGEAMLVGAALAAATGRRYVGFIDADNFV-PGSVREYCEAFAATGKAMVRLSWGSKPKLEFAKEGRSSRITNRWLNRLLSETGNAGEHAMSIELALKMCFAG-------GFAVEPFQYLDLLEQFRVEVLQETRNPHF--HQDKG-----DDHVKDMWAQALGV-
>GT55|KHE83765.1|Ascomycota_Fungi Neurospora crassa;-;Glycosyltransferase family 55 protein
VIVPCKGED-PNTIEGVLSGIPRG--C--LIVLVSNSEGRA---YREVMMHA-RPALAIHQSDANGKGEGMMLGIALVAAPQRRYVAFVDADITV-PGAVNEYCRAFAANPETMVRLRWASKPEIDYTCEGRSSQVVNRWLNKLLSATGNAGEHAMTMDLALSLRLAN-------GYAIEPFHFVELLDQAGVTIMQRTRNPHF--HRVTD-----DSHVRSMWASGLGS-
>GT55|WP_010868345.1|Euryarchaeota_Archaea Pyrococcus abyssi;MPGS;Mannosyl-3-phosphoglycerate synthase (MPG synthase) (MPGS) (EC 2.4.1.217)
IIVPMKNEK-LHLVDGVLKAIPHK--C--PIIIVSNSKREGPNRYKEVDLLTHSKVIMIHQKDPSGKGEGMIIGMLLAKAIGAEYIGFVDADNYI-PGSVNEYVKDYAASDYTMVRLHWRHKPTLYFKKWGRVSEITNHYLNLLISETGNAGEHAMTMKLAEIMPFST-------GYSVEPYEIVYLLERFGIEIFQETLNPHF--HEDKG-----QEHVKEMLLLSLAT-
>GT55|WP_012843016.1|Bacteroidetes_Bacteria Rhodothermus marinus;-;Mannosyl-3-phosphoglycerate synthase (EC 2.4.1.217)
IVVPIRDER-LKLLEGVLFGIPHQ--C--TVIIVSNSRRAPVDRFKEQDAFTQKQLLLVHQKDPNGKAEGMIMATLLARILGKRYIGFIDADNYF-PGAVYEYVHEYAASPYTMVRIAWHSKPQLFFAKYGRTSVVTNRFLNQLISYTGNAGEHAMTMELAMLLDYAT-------GYAIEPYHYIDLLEKYQVNVFQESRNPHL--HESKG-----EEHIDDMILSSLQV-
>GT55|WP_015407209.1|Chloroflexi_Bacteria Dehalococcoides mccartyi;-;Haloacid dehalogenase
IVLPIKDED-LKVFEGVLSGIPHD--C--LMIVISNSSKQEVDNFKEKDIITHRQAFVVHQKNPSGKAEGMILGIILTMFSGRDYVGFIDTDNYI-PGAVWEYAKHFATSPYSMVRILWKYKP-LYFKRWGRVSEVTNKHLNHLISSTGNAGEHAMSIELAKRLTYGT-------GYAVETKEIMSILEQFGVEILQETINPHL--HEDKG-----GDHLQDMLLPSLAV-
>GT60|AHA54486.1|Phycodnaviridae_Virus Emiliania huxleyi virus 18;-;Putative membrane protein
-------PPINTIEGLYNNAYE--PSRVLYMNDHLK------------NQLPQQPSVRVARNMKRA-----YLMKNLYR--GERYVMTLQSNAEICKDW-DKILIGMIKNRHTIFTS---AVMRPTYFKL---------NALKGGKMFWSPALSFAPAPAYKE-----------FVDGNIISSTIKLWTNGFNFYT-LPLTMAW-----AS--RSEASNWAHSASK-----
>GT60|CEF98033.1|Chlorophyta_Viridiplantae Ostreococcus tauri;-;Tetratricopeptide-like helical
-LDVYRNCEAHTLKRLFSRAKY--PERVFCQYKCKTPPPDA-LREQ-DEKEKCSRKTLDVQFREEGPCYAKHLAMRKWG--GEKYVLHIDAMTCVDEGW-DETLIAELGSDKSVLTAAPLEYSEEETLTKKYEIFV--YGTVKERSMFVNSLFSFARAEFVRDA----PPDAHFLHLGEELGATARLWSRGWELFA-PTRLPLL--HCYSH--VKR-AMWMEDEYDQREFA
>GT60|KND02831.1|Chytridiomycota_Fungi Spizellomyces punctatus;-;Fe2OG dioxygenase domain-containing protein
SIPSYRDSETSTVTSLLQTAAY--PHRLHLQ-------------DH-PIQDKLPPLPS----HPKGPAYARALIAKTFE--NQDYILQIDSHMRFGEGW-DTYLIQLLEKGQGLITMYPPNYDEPFGPVMMYPTGFDQDGMLRISGRLVASGFLFAPGTLYVSC----PPDPNYLFFGEEIVLSARLWTRGWDFWT-PGRGIVW--HAWKR--GYRKTFWENGREE----M
>GT60|WP_050138448.1|Proteobacteria_Bacteria Yersinia enterocolitica;-;glycosyl transferase
SIASYRDSELPTLHDMINTAKS--PENLNFQDDND-------INTF-INQGMLEPLHQLEYNQAKGACWARHMAEGLFQ--DETYFLQIDSHCRFIQHW-DHEMVTMLNDPKPILSAYPPGYERKNYVSRLIFNTFTPEGMVQMMS-YLAAGFIFTDGCFVREV----ANDPDIFFLGEEIAMAARAFTHGYDCYA-PHKILLW--HFYTR--SKHSKVWSDHVKLAWWET
>GT60|XP_008604164.1|Stramenopiles_Protista Saprolegnia diclina;-;Uncharacterized protein
-LSTFRDHRCYTLFTGYKRAVH--PDRLYVQVNPGDLRCLD-EYCK-MAN---EWPEEECKYKARGPTYARHHQQKLIG--DQEFCLQLDAHSVFTNGW-DPSLIDEWKNEMAILSTYLDGY-PPDQLPHLCTTMRGGNGCVRNVGALWGAGLSFGKCHAEKRV----LIDSHWMFDGEEFLRASHLWTYGYDMYS-PSTGVVY--HNYT---SVPARFEHVQRKAKEE--
>GT62|AAB65006.1|Ascomycota_Fungi Saccharomyces cerevisiae;ANP1;Mannan polymerase II complex ANP1 subunit (M-Pol II subunit ANP1) (Aminonitrophenyl propanediol resistance protein)
-CVPLRDAS-EHLPMFFNHLNTMTYPHNLLSFLVSDSS--DNTMGVLLSNSKRGNIEIYEKDFGKLMARARNWLGSVALKPYHSWVYWRDVDVETIPTTIMEDLMH-HDKDVIVPNVWRPLP-D--WLGNIQPYDLNSWKESEGGLQGIGGVSILAKAKVFRTGS---HFPAFFEKHAETEAFGRLSRRMNYNVIG-LPHYVIW--HIYE--------------------P
>GT62|AAB68171.1|Ascomycota_Fungi Saccharomyces cerevisiae;MNN9;Mannan polymerase complexes subunit MNN9 (M-pol I subunit MNN9) (M-Pol II subunit MNN9)
ILTPMQ----TFHQQYWDNLLQLNYPRELLGFITPRTATGDLALKKLENADQRSKITILRQNSQAAMALARNELLFSTIGPHTSWVLWLDADIIETPPSLIQDMTK-HNKAILAANIYQRFY-DEEKQPSIRPYDFNNWQESDTGLEGVGGGCTLVKAEVHRDGA---MFPNFFYHLIETEGFAKMAKRLNYDVFG-LPNYLVY--HIEE---------------------
>GT2-CWR|AAG60609.1|Chordata_Metazoa Homo sapiens;GT252;Procollagen galactosyltransferase 2 (EC 2.4.1.50) (Collagen beta(1-O)galactosyltransferase 2) (ColGalT 2) (Glycosyltransferase 25 family member 2) (Hydroxylysine galactosyltransferase 2)
-----RNAA-HTLPHFLGCLERLDYPKSRMAIWAATDHNVDNTTEIFREWLYHVEW----RPMDAALRTAR--------EKWSDYILFIDVDNFLTNPQTLNLLIA-ENKTIVAP--------------------------------------------------------------------------------------------------------------------
>GT62|CAA89103.1|Ascomycota_Fungi Saccharomyces cerevisiae;VAN1;Mannan polymerase I complex VAN1 subunit (M-pol I subunit VAN1) (Vanadate resistance protein)
-CIPLRNAA-DVLPLMFKHLMNLTYPHELLAFLVSDCSEGDTTLDALIAYDKPRSVQIFQKDFGKLMGRARNWLTANALKPYHSWVYWRDADVELCPGSVIQDLMS-KNYDVIVPNVWRPLP-T--FLGTEQPYDLNSWMESQEALAGVGGVSILAKAKIFRNGV---QFPAFFENHAETEAFGKMAKKMGYRVGG-LPHYTIW--HIYE--------------------P
>GT62|CEI96433.1|Mucoromycota_Fungi Rhizopus microsporus;-;Uncharacterized protein
VLTPLKDAA-RYLDRYFELLDRTTYPNHLIAFLVSDSS--DGTLEVLQEHRNRDSIRIFQKDFDQIMARSRNWLLSASLKPDISWVAWVDVDVVEYPPTIFEDLMR-ADADVIVPNCLLQRE-DNQ----FWGYDKNNWQETDESRKGVGATFTLVKAHVHREGA---IFPAFYQHQVETEGFAKIAKSMGFSVYG-LPGYLIY--HVQN---------------------
>GT62|ELU04414.1|Annelida_Metazoa Capitella teleta;-;Uncharacterized protein
ILTPISNSV-DRLANYFKLLCSLNYPHHLVAL--GEDTSTDKTYEIASSVSPYREIQVF--HFDTHLAHARNQLLMRGLR-DEDWVLWVDSDVAYVPPDLIQHLLS-AKGDVVVPSCM---Y-KNEF-GASMVYDKNTWRETSESIAGVGGCTLLVRANCHRKGL---NFPAFFDNHIETEGLAKMASRMKFSVKG-LPLVNVF--H------------------------
>GT62|ETO75650.1|Stramenopiles_Protista Phytophthora parasitica P1976;-;Uncharacterized protein
VMVVLKDTESRTAKDFLELLGTFDYPKEKVTVLTSSISEFEVVEKHLKQQ--RSRLSVLFRDDFRVIARYRNFALLATMELWHQHVVWLDADVQKVPSGLLKKMIR-SGLDIVEPMCV-RMK-ANGKDWYE--YDLNAWVGQRKVRRSVGGTMLYVKADVHRQGV---VFPTSGYDGIETEGLCYVAHFLGFKCWG-MPNDLIY--HI-----------------------
>GT62|GAE00156.1|Ascomycota_Fungi Byssochlamys spectabilis;-;Mannan polymerase complex subunit MNN9
ILTPL---T-RFYQGYWDNLVRLSYPHELLGFIIPKTKEGNAATSALQAADDRASVSILRQDFDESMSRARNSLLFTTLGPSTSWVLWLDADIVETPPTLIQDMAS-HNKAVIVPNCFQRYYNNDKKKMDVRPYDYNSWRDSDTAQSGVGGTALLVKAEVHRDGA---MFPPFFYHMVETEGFAKMARRLGYECFG-MPNYFVY--HYNE---------------------
>GT2-CWR|NP_078932.2|Chordata_Metazoa Homo sapiens;GT251;Procollagen galactosyltransferase 1 (EC 2.4.1.50) (Collagen beta(1-O)galactosyltransferase 1) (ColGalT 1) (Glycosyltransferase 25 family member 1) (Hydroxylysine galactosyltransferase 1)
VLIALRNAA-HALPTTLGALERLRHPRERLW--VATDHNMDNTSTVLREWL--HSVE--WRPAEAALKSARDM--------WADYILFVDADNLILNPDTLSLLIA-ENKTVVAP--------------------------------------------------------------------------------------------------------------------
>GT62|WP_050799994.1|Actinobacteria_Bacteria Streptomyces himastatinicus;-;glycosyltransferase
VLTPVKNAA-AFLPRYLDNLHTLDYPRDAVGLLEGDSR--DGTWEALQDAE--RRVTLVRRHFGSVLARARNHLLSRAL-ADERWVLWLDVDVTDYPADLVQRLLG-ARREIVVPHCVT--------EPAGPSFDLNTFVLRPDAHTAVGGTALLVHADLHRDGL---VFPAVHRGLIETEGLAALAQDMGVECWA-LPAVEVV--H------------------------
>GT62|XP_001645630.1|Ascomycota_Fungi Vanderwaltozyma polyspora;-;Uncharacterized protein
-CVPLRDAE-DVLPLMFKNIMNLTYPHELLAFLVSDCTEGDHTLESLIAYGKPRSVQIFQKDFGKLMGRARNWLMTNALKPYHAWVYWRDADVELCPGTVIEDLMS-KNFDVMVPNVWRPLP---EFLNSEQPYDLNSWMESNEALKGVGGVSILVKAKLFRSGI---HFPAFFENHAETEAFGKMAKKMGFRVGG-LPHYTLW--HIYE--------------------P
>GT62|XP_001764830.1|Streptophyta_Viridiplantae Physcomitrella patens subsp. patens;-;Predicted protein (Fragment)
ILSPMKQVK-DHISRYFTLLHSLSYPKNSLGFLVSDSP--DGTYECVRDHTEKRDVTLVHQNFNRVLAKSRNYLLFSALRPHHDWVLWIDSDISEYSPSLIEDLLG-PDKHIIVPNSFWRDE-E----GEEHPYDRNSWRETEESTKSVGGTVLLVRARLHREGL---VFMPVFQKAIETEALGKLALALGYQPWG-LPNYITL--H------------------------
>GT62|XP_002607682.1|Chordata_Metazoa Branchiostoma floridae;-;Uncharacterized protein
ILTPVAGKI-RAVPKYLSLVKSLTYPRSKIAILMSNIHD-DESLNNIHSMK--RSARLFRKDYESILAQSRNQLLLRALGAEE-WVLWFDFDLVAIPPNITETLIG-ADKPIVAPHCVWGPD-NDT-------YDLNSYQETLEFQKAVGGTCLLVKGRLHRDGL---IFPPYMDNKLETEGLVAMAKKMGYQKY------------------------------------
>GT62|XP_013894991.1|Chlorophyta_Viridiplantae Monoraphidium neglectum;-;Uncharacterized protein
--------------------RSQDYPACRLGLLVSNETFYPAAIRAAEQLDRGARLVVINRAMDAVLARLRNLAVSVALELEEA-VLWVDADITFMPNHTLSTLVA-SGKDIV------------------------------TTITSVGGCTTLVRADVHREGA---LFAPYGYDGVESEGLCYAARYLGRTCWL-ATKLVTY--H------------------------
>GT64|AAB07008.1|Chordata_Metazoa Homo sapiens;EXT2;Exostosin-2 (EC 2.4.1.224) (EC 2.4.1.225) (Glucuronosyl-N-acetylglucosaminyl-proteoglycan/N-acetylglucosaminyl-proteoglycan 4-alpha-N-acetylglucosaminyltransferase) (Multiple exostoses protein 2) (Putative tumor suppressor protein EXT2)
--IVLTYDR-VESLFRVITEVSKVPSL--SKLLVVWNNNKNPPEDS-LWPKIRVPLKVVRTA--ENKLSNRFFPYDEI---ETEAVLAIDDDIMLTSDELQFGYEVWREPDRVGY--PGRLH-LWDHEMNKWKYESEWTNEV-----SMVLTGAFYHKFNYLTYKMPGKNWVDAHMNCEDIAMNFLVANVTGKAVI-KVTP-RK--KFKPELDQTHMVERSECNKFASVFL
>GT64|AAB62283.1|Chordata_Metazoa Homo sapiens;EXT1;Exostosin-1 (EC 2.4.1.224) (EC 2.4.1.225) (Glucuronosyl-N-acetylglucosaminyl-proteoglycan/N-acetylglucosaminyl-proteoglycan 4-alpha-N-acetylglucosaminyltransferase) (Multiple exostoses protein 1) (Putative tumor suppressor protein EXT1)
AVIHAVVSQ-SQPVLKLLVAAAKSQYC--AQIIVLWNCDKPLPAKH-RWPATAVPVVVIEGE--SKVMSSRFLPYDNI---ITDAVLSLDEDTVLSTTEVDFAFTVWQSPERVGY--PARSH-FWDNSKERWGYTSKWTNDY-----SMVLTGAIYHKYHYLSHYLPAKNMVDQLANCEDILMNFLVSAVTKLPPI-KVTQ-KK--QYKTMADPDHFAQRQSCNTFASWFL
>GT64|AAC02898.1|Chordata_Metazoa Homo sapiens;EXTL2;Exostosin-like 2 (EC 2.4.1.223) (Alpha-1,4-N-acetylhexosaminyltransferase EXTL2) (Alpha-GalNAcT EXTL2) (EXT-related protein 2) (Glucuronyl-galactosyl-proteoglycan 4-alpha-N-acetylglucosaminyltransferase) [Cleaved into: Processed exostosin-like 2]
-LIMQTYNR-TDLLLKLLNHYQAVPNL--HKVIVVWNNEKAPDELW-NSLGPHIPVIFKQQT--ANRMRNRLQVFPEL---ETNAVLMVDDDTLISTPDLVFAFSVWQQPDQVGF--VPRKH-VST-SSGIYSYGSFNGDQY-----SMVLIGAFFNSYLELQ-RQPAHALIDDTQNCDDIAMNFIIAKHIGKTSV-KPVN-MD--NLEETHRAEHALQRSYCNKLVNIYL
>GT64|AAC32397.1|Arthropoda_Metazoa Drosophila melanogaster;EXT1;Exostosin-1 (EC 2.4.1.224) (EC 2.4.1.225) (Protein tout-velu)
-------------LYKLVRTITKSQFV--ERILVLWAADRPLPLKK-RWPPTHIPLHVISEG--RPSISQRFLPYDEI---QTDAVLSLDEDAILNTDELDFAYTVWRDPERVGY--PARAH-FWDDSKNAWGYTSKWTNYY-----SIVLTGAFYHRYNYLTNWLSLLKTVQQSSNCEDILMNLLVSHVTRKPPI-KVTQ-RK--GLQSGNDPDHFIQRQSCNTFAAVFL
>GT64|AAC39598.1|Chordata_Metazoa Homo sapiens;EXTL3;Exostosin-like 3 (EC 2.4.1.223) (EXT-related protein 1) (Glucuronyl-galactosyl-proteoglycan 4-alpha-N-acetylglucosaminyltransferase) (Hereditary multiple exostoses gene isolog) (Multiple exostosis-like protein 3) (Putative tumor suppressor protein EXTL3)
VVMLTY-ER-EEVLMNSLERLNGLPYL--NKVVVVWNSPKLPSEDL-LWPDIGVPIMVVRTE--KNSLNNRFLPWNEI---ETEAILSIDDDAHLRHDEIMFGFRVWRERDRVGF--PGRYH-AWDIPHQSWLYNSNYSCEL-----SMVLTGAFFHKYAYLSYVMPQRDMVDEYINCEDIAMNFLVSHITRKPPI-KVTS-RW--TFRPGHDDSHFHERHKCNFFVKVYL
>GT64|AAC47510.1|Nematoda_Metazoa Caenorhabditis elegans;EXT2;Exostosin-2 homolog (EC 2.4.1.223) (EC 2.4.1.224) (EC 2.4.1.225) (Glucuronyl-galactosyl-proteoglycan 4-alpha-N- acetylglucosaminyltransferase) (GlcNAc transferase I) (GlcNAcT-I) (Glucuronyl-galactosyl-proteoglycan/Glucuronosyl-N-acetylglucosaminyl-proteoglycan 4-alpha-N-acetylglucosaminyltransferase) (GlcAT-II) (GlcNAc transferase II) (GlcNAcT-II) (Glucuronyl transferase II) (Multiple exostoses homolog 2)
-VVLLTYER-DAVLTGALERLHQLPYL--NKIIVVWNNVNRDPPDS--WPSLHIPVEFIRVA--ENNLNNRFVPWDRI---ETEAVLSLDDDIDLMQQEIILAFRVWRERDRVGF--PARHH-A------RYGYNSNHTCQM-----SMILTGAFIHKYLTATYEMPAREHVNSIKNCEDIAMNYLVSHLTRKPPI-KTTS-RW--TLKPTKEGTHFEKRHECRLFTKIYL
>GT64|AAC51141.1|Chordata_Metazoa Homo sapiens;EXTL1;Exostosin-like 1 (EC 2.4.1.224) (Exostosin-L) (Glucuronosyl-N-acetylglucosaminyl-proteoglycan 4-alpha-N-acetylglucosaminyltransferase) (Multiple exostosis-like protein)
ALIWV-GPP-GQPPLKLIQAVAGSQHC--AQILVLWSNERPLP--S-RWPETAVPLTVIDGH--RK-VSDRFYPYSTI---RTDAILSLDARSSLSTSEVDFAFLVWQSPERVGF--LTSSH-FWDEAHGGWGYTAERTNEF-----SMVLTTAFYHRYHTLTHSLPKRTLADEAPTCVDVLMNFIVAAVTKLPPI-KVPY-GK--QRQAAPRPKPPAPAPDCNQIAAAFL
>GT64|AAD34749.1|Arthropoda_Metazoa Drosophila melanogaster;EXT3;Exostosin-3 (EC 2.4.1.223) (Protein brother of tout-velu)
IVMLTY-ER-EQVLMDSLGRLYGLPYL--HKVVVVWNSPKPPLDDL-RWPDIGVPVAVLRAP--RNSLNNRFLPFDVI---ETEAVLSVDDDAHLRHDEILFGFRVWRERDRVGF--PGRYH-AWDNPNGQWHYNSNYSCEL-----SMVLTGAFVHKYLYLTYHLPQRDKVDEYMNCEDIAMNFLVSHITRKPPV-KVTS-RW--TFRPGEDDTHFQERHKCNFFSRVFL
>GT64|AAD38573.1|Arthropoda_Metazoa Drosophila melanogaster;EXT2;Exostosin-2 (EC 2.4.1.224) (EC 2.4.1.225) (Protein sister of tout-velu)
AVILTY-DR-VESLFLLIQKLAVVPSL--QSILVIWNNKKSPPHLS-TFPSISKPLKIRQTK--ENKLSNRFYPYPEI---ETEAILTIDDDIMLTTDELDFGYEVWREPDHVGF--PSRIH-VWENVTMRWHYESEWTNQI-----SMVLTGAFHHKWSHMTHAMPGKDWVDEHMNCEDIAMNFLVANITNNPPI-KVTP-RK--KFKPEADLNHMRERSACDRFSKIYL
>GT64|AAG52433.1|Streptophyta_Viridiplantae Arabidopsis thaliana;GT643;Glycosyltransferase family protein 64 C3 (GT64 C3) (EC 2.4.1.-)
VLINGYEYR-IPLLQTIVASYSSSSIV--SSILVLWGNPSTPDQLL-DQLPGSASISLIQQS--SSSLNARFLPRSSV---DTRAVLICDDDVEIDQRSLEFAFSVWKSPDRVGT--FVRSH-GFDLQGKEWIYTV-HPDKY-----SIVLTKFMMKQYLFESGVEMERMIVDQMRNCEDILMNFVAADRLRAGPI-MVER-VR--DWGARSRREHRKRRGNCREFHRVML
>GT64|CAB87837.1|Streptophyta_Viridiplantae Arabidopsis thaliana;GT644;Glycosyltransferase family 64 protein C4 (GT64 C4) (EC 2.4.1.-) (Protein ECTOPICALLY PARTING CELLS 1) (AtEPC1)
LLMNT-WKR-YDLLKKSVSHYASCSRL--DSIHIVWSEPNPPSESL-KEYGHEVELRFDINK--EDSLNNRFKEIKDL---KTDAVFSIDDDIIFPCHTVDFAFNVWESPDTVGF--VPRVH-WSNDKANYYTYSGWWSGTY-----SMVLSKAFFHKYLSLTNSMPAREFTTKNRNCEDIAMSFLIANATNAPAI-WVKG-------KYESIGGHTEKRTHCNRFVAEFL
>GT64|CCD75422.1|Platyhelminthes_Metazoa Schistosoma mansoni;-;Putative exostosin-3 (EC 2.4.1.223)
-IVVLTYDR-FNLLCQTLESFLNLPYL--HSILVVWNNPVPPNPDL-SWPQLHVPIKVIRSQ--NNSLNNRFLPYDLI---ETDAILSIDDDIQLRHDEIVFGFRVWRERDQVGF--PARAH-FWNGSDSSWFYNSDYMCEF-----SMILTGAFFHKYTFATWEMSPRNMVNNYFNCEDIAMNFLLAHITRKPPI-KVTL-HW--SFDVYDRSDHYAARSRCNWLTSHYL
>GT64|EWG52523.1|Ascomycota_Fungi Gibberella moniliformis;-;Glyco_transf_64 domain-containing protein
IAMQTYRRP-KELEETLIILSEEVPSL--LEIVVVWNDLENYPPDD-YVSKHGVPVRFRKSK--RNSLNEKLWPDPDY---KTQAILLSDDDVYYHPNDLEFVFQTWRKRNRVGA--LARCT-PVDTF-GYHKYTSRWGDDY-----NMILTNLFSHVFLDYSSTIMTREYVDEGFNCEDLAMNYVHGLLTGEGPL-LING-HE--KYVFVMKKGHMEARSACNNFSKMFL
>GT64|NP_196070.2|Streptophyta_Viridiplantae Arabidopsis thaliana;GINT1;Glucosamine inositolphosphorylceramide transferase 1 (EC 2.4.99.-) (Glycosyltransferase family protein 64 protein C5) (GT64 C5)
LATMTYDAR-LWNLKMYVKRYSRCPSV--KEIVVIWN-KGPPPDLS-ELDS-AVPVRIRVQK--QNSLNNRFEIDPLI---KTRAVLELDDDIMMPCDDIEKGFRVWREPERVGF--YPRF------VDQTMTYSARSHKGY-----NMILTGAFMDVFFDMQSDKAKRVFVDEQFNCEDILLNFLYANASGSGKV-RP-S-LV--TIDSKGNTNHYRKRSKCRRFSDLY-
>GT64|XP_002119284.3|Chordata_Metazoa Ciona intestinalis;-;exostosin-2-like
AVILAY-DR-VLSLFQLIKSIDKVPSL--RMILVVWNNQKAFPARN-EWPIIEHEWKVIQTS--SNELSNRFFPYNEI---KTEGVLAIDDDIMLTTDEIEFGFQVWRENDRVGF--PPRLH-IWGD-DGKMRYVSDWTNDI-----SIVLTGAFYHNYNYLTYKMPGKDWVDNHMNCEDIAMNFLVSNYSGKAPI-KVTP-RK--KFKAELDETHMVERSTCNHFASIYL
>GT64|XP_002502926.1|Chlorophyta_Viridiplantae Micromonas commoda;-;Glycosyltransferase family 64 protein (Fragment)
-VLLNTFKR-RDLLKKAVAHYATCADV--AEIRVVWSEQVPPPTRG-EEPKPSM-VTYDTHP--TTSIQNRFDPPSGI---STRAVFNVDDDVRMPCAALTRGFDAWRAEDVVGY--YPRTH-KPDDAGCGWRYSLWRHGDF-----SIVLTKAFMRTYMSLSEGLPQRRYIDEYKNCEDIAMQILTAKITGKPPV-YVPY-LW--A-KEGKGSGHHVHRGECTDLSRM--
>GT64|XP_002526868.1|Streptophyta_Viridiplantae Ricinus communis;-;Exostosin-2, putative (EC 2.4.1.223)
ILINT-WKR-YDLLKQSISHYSSCGGL--DSIHIVWSEPDPPSESLVKSNSKGVELKFDINE--EDSLNNRFKEIKDL---MTDAVFSIDDDIIFSCSTVEFAFNVWQSQDTVGF--VPRAH-WIDKSQGKYIYGGWWTGTY-----SMVLSKAFFHKYLRLTNEMPAREYTTKNRNCEDIAMSFLVANATGAPPI-WVKG-------KFESLGGHSEKRTQCNRFVAEYL
>GT64|XP_005708320.1|Rhodophyta_Protista Galdieria sulphuraria;-;Alpha-1,4-N-acetylglucosaminyltransferase EXTL3 isoform 1
VVISTY-NR-QKLLERLITHYSRCRKV--HKIYVVWHSPN-IEAPY-DFRVGSVPVVFLSQK--YDSLNNRFNPIPGL---KTQSVLICDDDVYVEPDDIDFTFEVWKSPNSVGA--FPRFH--RRTTSNEWEYLVRTFRRY-----SIMLTKFFMKSFLFWSCILPEHKYIDEHMNCEDIAMQMMITGMTRTPPL-AVVG-KE--DYGDKTKSGHKEARNKCTYFSELFL
>GT64|XP_010243162.1|Streptophyta_Viridiplantae Nelumbo nucifera;-;glycosyltransferase family protein 64 protein C5-like isoform X2
LLTMTYEAR-LWNLKMYVKHYSRCSSV--KEIVVVWNKGQ-PPELS-DLDSV-VPVRIRMEK--QNSLNNRFKVDPLI---KTKAVLELDDDIMMTCDDVERGFRVWREPDRVGF--YPRLI-DGNPLKYRDEKYARTHKGY-----NMILTGAFVDSVAFEWSEEAKREVVDKYFNCEDVLLNFLYANASSSRTVEYVKP-AW--AIDSKRNTQHYRIRSDCLKFSKMY-
>GT64|XP_010776435.1|Chordata_Metazoa Notothenia coriiceps;-;PREDICTED: exostosin-like 2 isoform X2
IIIQTY-NR-TDILLKLLNHYQAVPHL--QKIIIVWNNVQTPLKLW-NSLGPHVPVLFKEQT--INQMRNRLQPFPEI---ETDAVLMLDDDTLVSVPDISFAFSVWKQPDQVGF--VPRKH-VST-PGGVYSYGSFGGDKY-----SMVLVGAFFHRYLQLQ-DQPPHALVDETQNCDDIAMNFAVAHSTGKPSV-KPVD-LR--NLKAHHRPEHLLQRSFCNRLTQIYL
>GT64|XP_012377673.1|Chordata_Metazoa Dasypus novemcinctus;-;exostosin-like 1 isoform X1
ALIWV-GAP-GQPPLKLIQAVAGSQHC--AQILVLWSSERPPPPRG-KWPETAVPLTVLDGP--RKA-SDRFFPYSAI---STDAILNLDAHSNLSTSEVDFAFVVWQSPERVGF--LTWSH-FWNEAWGGWGYTAEKANEF-----SMVLTTAFYHRYHTLTQYLPKRTLADEAPTCVDVLMNFLVAAVTKLPPI-KVPY-GK--EHQAKLEPQ--PPAWDCNRIAAGFL
>GT64|XP_013380983.1|Brachiopoda_Metazoa Lingula unguis;-;exostosin-like 3
IVMLTY-ER-ESVLINAIQRLKGLPFL--NKVVVVWNSPGRPSPDL-RWPDIGVPVHVVKTS--KNSLNNRFLPYDVI---ETEAVLSIDDDAHLRHDEIVFGFRVWRERERVGF--PGRFH-AWDVEHTGWHYNSNYSCEL-----SMVLTGAFIHKYLYLSYVMPQRDKVDEYLNCEDIAMNFLVSHITRQPPI-KVTS-RW--TFRPGVDDSHFQERHKCNFFAKVYL
>GT64|XP_013775226.1|Arthropoda_Metazoa Limulus polyphemus;-;exostosin-1-like
-------SS-SSPLARLIKNVAKSSFA--SRILVLWNGETAPPIAN-KLPQVSVPVNIIQPP--QKTISSRFHPHPLV---QTDAVLNLDEDAVLTTEEVDFAFKVWQSPERVGY--PARSH-YWEDSKSCWGYTSKWTNEY-----SMILTGAFYHRYNYLTFYLHNHKTVDQSQNCEDILMNFLVSHVTNLPPI-KVTQ-RK--QYKDGNDPDHFVQRQICNTFVDTFL
>GT67|AAP55681.1|Euglenozoa_Protista Leishmania major;-;Putative phosphoglycan beta 1,3 galactosyltransferase 5
------TSS-LAALSAQLSLPVTPAFTAAAQYVCHASAALWQEAL-HHRNSLLFWTDRKPTTKKEVGMSQKTVLWLNYAYTDVPYIMKGDDDTYLKVPQYLSDLRH-VPRECLYWWWYDNH--N-VV--------------------FGHGPGYALDRRLIKAVLNNQRLLMLLLMQYEDLFVGRQLQEVCMKRPLRSQTTWSSLMHYAMP-EIPYFIHYYF---------
>GT67|BAB08785.1|Streptophyta_Viridiplantae Arabidopsis thaliana;-;Hexosyltransferase (EC 2.4.1.-)
----------------------------------------------------------------------KTYTYFSSLPDPYHYVMKADDDTYIRLESLVASLRP-LPREDLYYGYVIPD--PFVH--------------------YMSGMGYLVSWDIAVWLKDSEIPKKH-----EDKVFGDWIREGRRGKNRFHELWPDTAVHLLKN-QEWIRTLNYF---------
>GT67|ESA07121.1|Mucoromycota_Fungi Rhizophagus irregularis;-;Hexosyltransferase (EC 2.4.1.-)
-------QR-RNLAGDIVDFKFI--LGIPSDNNPELKLKLKAEND-TYGDLVLMVE--NMNNGKEQLDTTR-----------YDYVSKVDDDLFIHFQNLALNLRP-LTRGHLYYGNKSPH--SF----------------------FIRGTIEVLSVDLAHLIASFPFKKRE-----EDVQLGAFLNKHAKSLNTIPWASPNSAIHWLK---------------------
>GT67|XP_001462765.1|Euglenozoa_Protista Leishmania infantum JPCM5;-;Phosphoglycan beta 1,3 galactosyltransferase (Phosphoglycan_beta_1_-3_galactosyltransferase)
GSADSPRPP-LAVLAEHLRLPIIPAFTAAARFLCEASSGLWMEAL-QHSDVLIMLADRRETA-KQVGMTQRTVLWLEYAYHDAPFIVKSYDDIYIKVPQIVSDFAY-VRRHRVHWGLRDEK--RFL------------------------QRQHMMTRKLARVVLELRDVALLVAMTEEDRFIGSVLHGRRARRRITI-VTWASALHRCTP-ADMYYLHNYFVEEHR----
>GT67|XP_007221054.1|Streptophyta_Viridiplantae Prunus persica;-;Hexosyltransferase (EC 2.4.1.-)
------------------------------------------EIL-RFNDIIL-----NCTENM------KTYTYFSSLPGRKDYVMKADDDVFIRLKPLALSLKP-LPRVDMYYGFVIPN--PFVE--------------------YMSGMGFLLSWDLVEWIGESDIPRKE-----EDKMVGKWLKMGRKARNRFHELIPETAVHRLKR-WDWLHVLEFFNVTKQ---V
>GT67|XP_805064.1|Euglenozoa_Protista Trypanosoma cruzi;-;Hexosyltransferase (EC 2.4.1.-)
RFPGVATRA-NDFTGAMLVLYV---LGRHPSHGYYYSAALLEEAA-QWNDVVLM-NEGRVTTNKDVGMTRKTYMWFDLAPRTARYIAKGDDDIFLRVPLFVAHLRL-LPRRGIYMGYHIGT--TQFWKMGLPGNT------------FMAGCCYTLSRDVAEALVSYKPLRRLLRFHNEDAMVAWVLEKEVRYQPMVSQVVPTSCVHHVRE-DDYAALMARFGNDTS---P
>GT75|AAF07834.1|Streptophyta_Viridiplantae Arabidopsis thaliana;RGP3;UDP-arabinopyranose mutase 3 (EC 5.4.99.30) (Reversibly glycosylated polypeptide 3) (AtRGP3) (UDP-L-arabinose mutase 3)
IVIPTIRN-----LDFLEMWRP--FFEQ-YHLIIVQDGDPSKVINIPVGFDYELYNRNDINRILFKDSACRCFGYMVSK---KKYIYTIDDDCFVAKDPNALEQHIKNLSTPHFFNTL-YDPYVRGYPFSMREGAITAVSHGLWLNIPMCGMNLAFDRELIPAMYFG-LMGDGPIGRYDDMWAGWCVKVICDHMGWGVKTGLPYIWHSKAS--NPFVNLKKEYQEEAIPFD
>GT75|AAM52234.1|Streptophyta_Viridiplantae Arabidopsis thaliana;RGP2;UDP-arabinopyranose mutase 2 (EC 5.4.99.30) (Reversibly glycosylated polypeptide 2) (AtRGP2) (UDP-L-arabinose mutase 2)
IVIPTIRN-----LDFLEMWRP--FLQP-YHLIIVQDGDPSKKIHVPEGYDYELYNRNDINRILFKDSACRCFGYMVSK---KKYIFTIDDDCFVAKDPNALEQHIKNLSSPFFFNTL-YDPYVRGYPFSLREGVSTAVSHGLWLNIPMCGMNLAFDRDLIPAMYFG-LMGDGPIGRYDDMWAGWCIKVICDHLSLGVKTGLPYIYHSKAS--NPFVNLKKEYQEEIIPFD
>GT75|AAM66046.1|Streptophyta_Viridiplantae Arabidopsis thaliana;RGP5;Probable UDP-arabinopyranose mutase 5 (EC 5.4.99.30) (Reversibly glycosylated polypeptide 5) (AtRGP5) (UDP-L-arabinose mutase 5)
IVIGALNAD---LTQFLTSWRP--FFSG-FHLIVVKDPELKEELNIPEGFDVDVYSKTDMEKVVFSGYSCRYFGYLVSK---KKYIVSIDDDCVPAKDPDAVTQHVINLATPLFFNTL-YDPYVRGYPFSLRSGVPCAASCGLWLNLPISGINIAFNRELVPALVPA-LRLAGGKVRWEDVWCGMCLKHISDHLGYGVKTGLPYVWRNERG--DAVESLRKKWMEKSVPFD
>GT75|AAP68280.1|Streptophyta_Viridiplantae Arabidopsis thaliana;RGP1;UDP-arabinopyranose mutase 1 (EC 5.4.99.30) (Reversibly glycosylated polypeptide 1) (AtRGP1) (UDP-L-arabinose mutase 1)
IVIPTIRN-----LDFLEMWRP--FLQP-YHLIIVQDGDPSKTIAVPEGFDYELYNRNDINRILFKDSACRCFGYMVSK---KKYIFTIDDDCFVAKDPNALEQHIKNLSTPFFFNTL-YDPYVRGYPFSLREGVSTAVSHGLWLNIPMCGMNLAFDRELIPAMYFG-LMGDGPIGRYDDMWAGWCIKVICDHLGLGVKTGLPYIYHSKAS--NPFVNLKKEYQEDIIPFD
>GT75|BAA96988.1|Streptophyta_Viridiplantae Arabidopsis thaliana;RGP4;Probable UDP-arabinopyranose mutase 4 (EC 5.4.99.30) (Reversibly glycosylated polypeptide 4) (AtRGP4) (UDP-L-arabinose mutase 4)
IVIPTIRS-----LDFLEQWRP--FLHH-YHLIIVQDGDPSIKIRVPEGYDYELYNRNDINRILYKDGGCRCFGFMVSK---KKYIYTIDDDCFVAKDPNVIAQHIKNLSTPHYFNTL-YDPFVRGYPFSLREGVQTAISHGLWLNIPMCGMNLAFNRELVPAMYFG-LMGEGPISRYDDMWAGWAAKVVCDHLGFGVKTGLPYLWHSKAS--NPFVNLKKEHQEDMVPFD
>GT75|EGT36658.1|Nematoda_Metazoa Caenorhabditis brenneri;-;Uncharacterized protein
IVVTSISYP-T------EDVKRLASFDD-WNLVVVADTKTPLDWKLD---NVHFLSVEYQEQLPYKSYTRKNIGYLYAIYHGAEWIYDTDDDNKPLKQFDYEDRYRVQNSEERLFN--PYQFFPRGFPLEYLEKHRAAVQQGLVHHDPWNSQNTLFHKSA----FHT-LFLPTVSFRTTDIWRSFISQKILHLSGLTVSFVPTNAVQFRNA-HDYLKDFKDEKSGRMIEF-
>GT75|EWM20265.1|Stramenopiles_Protista Nannochloropsis gaditana;-;Uncharacterized protein
-VVTTIFGP-TTL------VRQLVGMKD-WCVVVVGDKKSPSTYDIQSD-TLIYLSPEEQEAL-WNHFGRKNIGFLYAMHHGAEVIYDTDDDNILKVDKDVVRSHVYNPS----FESVHVKDGPRGFPVDLITDTSITIVQSLADHDPFNAQATIFGK----VGFWG-MLLPIVHGRVSDIWRSYVTGRIMWEAGQRLAFASPFVTQCRNP-HSYVADFDAESAGALVSW-
>GT75|KDD75206.1|Chlorophyta_Viridiplantae Helicosporidium sp. ATCC 50920;-;Reversibly glycosylated polypeptide
IVIPTIRNL-DFLEQWYPGWRP--FFEK-YHIIVVQDGDPSRVVQVPAGFDYELYNRNDIERILFKDSACRCFGYMVSK---KKYIYTIDDDCFVANKPDALEQHITNLSTPEFFNTL-YDPYVRGYPFSMREGKPTAVSHGLWLNIPMCGMNLAFDREAIPAMYFG-LMGEGPWGRYDDMWAGWCVKVIADHLGLGVKTGLPYIFHSKAS--DPFVNLRKEYQEKIIPFD
>GT75|KFH71421.1|Mucoromycota_Fungi Mortierella verticillata NRRL 6337;-;hypothetical protein MVEG_01720
IVVTTINQP-TDAMEILCNL------PG-WNVVVVADTKSPKEWACG---SCVYLTVEEQLCLDFKAYTRKNIGYLWAIKHGATTIFDTDDDNLPTSKQIIFTDSFVVFNETESRSINIYSHFPRGFPLSEINITRTLIQQGLADLDPFNSQNTLFSYDSL----WG-LVLPIVSFRVCDIWRGYWVQRLLWDVNGSLSFTKPTVEQIRNA-HEYLDDFKDEITSRFIDFD
>GT75|KFH71702.1|Mucoromycota_Fungi Mortierella verticillata NRRL 6337;-;hypothetical protein MVEG_01997
--------------------------------VVVAETNTPKDWACGSCL---FLSAEEQQCLGFKSYSRKNVGYLWAIKQGATTVFDIDDDNLPSSKGFVFDSPTESFAACRSINFNAH--FPRGYP--LTESHQTTSAHYLHSGSPRVSHNPVVS-----------LQLCG--------WRGYWVQRLLWYIDDSLAFTATAVEQTRSPVHNFLEDFKHDRPVRLTKF-
>GT75|KKT35345.1|Bacteria_Bacteria Candidatus Gottesmanbacteria bacterium GW2011_GWB1_44_11c;-;UDP-forming alpha-1,4-glucan-protein synthase
VVIPTIRT-----LSFLSEWKLL--LSQ-CHLLIVEDHE-EKMIKTPKGFSISHYCWEDIQHDFRQNAGIRSYGFWKAWKKGADIIITLDDDCYPV-DRNFIKQHVHNLHAPH-----SWQPTIRGIPYRIRNTYPVMVSHGLWTKHPMCSMNLAFRKEVTPFMYFP-LMGKSEFDRFDDIWAGICAKKIMDHLGFAVANGSPFVEHRKAS--DPDVNIKKEKNEKLWQW-
>GT75|WP_006668727.1|Cyanobacteria_Bacteria Arthrospira maxima CS-328;-;Uncharacterized protein
IVITSIAFD-H--NNVLQKIAQESQARK-LYFTVIGDEISPSDFNL-EGCD--FYSIARQEALDKRHYARKNIGYLLAIQQGAEIIIETDDDNFPYESWEKRERYQTVSPNLGWCNVYKY--FPRGLPLDEVNLANCPIQQGLANDNPFNSQNTTWWADAYPLLY-----LPACSFRMTDIWRSFIAQRIAWENGWSVLFHQPTVYQERNE-HNLMRDFQEEINKAIAKT-
>GT75|WP_011572705.1|Euryarchaeota_Archaea Haloquadratum walsbyi;-;Homolog to arabinopyranose mutase
-VTTTISQP-TFFEDYIENIENDHSLDR-FEFVTVGDLSTPTSVRDCEGLSDEYDTIDWMERGLYNSIQRRNIGYLQASEAGADVIVSLDDDNLAQDDDDFVGETQSVLSAPNWYNSASMMEYHRGFPYSRRDEEQVMIRAGLWLDVPVNTQNTAFHTDLMPLIHTI-PMGDGEISRFDDIWLGFFAEKILQEMGGTVAYGSPVSIHDRNR-HNLNRELEHEANEVIVDI-
>GT75|WP_049921551.1|Euryarchaeota_Archaea Halopiger djelfimassiliensis;-;alpha-1 4-glucan-protein synthase
VIVPTIREY-ECMRSYFENAREHGFDSR-LHVVLVTEDFCEERMLEEEGVSGEVFDGSRREHGIAASHAETSFGLLYMWANDFDYGFFIDDDTLPHSDVDFFGTHMENLSDENWVNVL-YQNAPRGYPYSAMDETEVVASQGLWTNVTVCSMNLAFRREVIPAFYQL-PMDDNEVGRFDDIWSGVFLKRACDVLGKRIYNGDPLCEHNKAP-RSTFDDLNNEVNEHLWRV-
>GT75|XP_002179412.1|Stramenopiles_Protista Phaeodactylum tricornutum;-;Predicted protein
-VVTTIFEP-G------ESIYGVSKLRN-WCLVIIGDTKTPDAAYADLNSLDNVIYLSARDQMLFQSFARKNLGYLFAIRHGAQVIYDFDDDNVESKEPFTYRQGMKSPNLPLPFNPLPYMGPPRGFPFGSIPVSRIGVIQSVCDGDSYNAQATVHLQNSFWAMFLP-FSVPG---RVTDIWRAYVAQRLFRDINLSLVYAGPLVTHTRTA-HNYLADFQAE---------
>GT75|XP_005642655.1|Chlorophyta_Viridiplantae Coccomyxa subellipsoidea;-;Uncharacterized protein
VVITTINYP-T------DTVKRLAKAPG-WRVVVVADQKTPRDWQL---YNVDILDLEKQKELDYNHYGRKNLGYLWAIQHGATQVYETDDDNLKLDEPPALSGLSYYVASG--VEVCNYAFFPRGYPLEHRQPAQPLILQGLADMDPFNSQNTLFARDAL----WG-LLIPVTTFRVCDIWRGYWVQRLLWEIDGNLAFGPPTVNQFRNP-HNLLHDMAEE---------
>GT75|XP_005838730.1|Cryptophyta_Protista Guillardia theta;-;Uncharacterized protein
IVTTTIYVP-KAIHAYMKNAKENGHSDA-I-FIVAGDKKTPPEAKQAEEFKMKCLTVDDQIQDFWNSIQRRNIAILLAYQIGCEIIITIDDDNYFVEGQDFIGEHIRHISNTGWLNVCEYLEKPRGYPMNQRQNRKVVVNAGLWLDDPFNSQNTAISREVIPGYCLS-P----NVGRYDDIWAGYVVMAIADKLDHAIMFGFPLVKQERNP-HNYFNDHQAERTETFCEW-
>GT75|XP_006411445.1|Streptophyta_Viridiplantae Eutrema salsugineum;-;Uncharacterized protein
-----------------EELKSLVKIRG-WQVLAVGNSMTPKDWS----LKGAIFLSLDAQADLYDSFVRKSVGYLFAIQHGARKIYDADDRGEVIDGDDAKQEPILQYENPNRTVVNPYIHFPRGLPYTEVFGGKQFIQQGISNGLPVNSFNTLYHSSA----FWG-LMLPVVSSMASDVLRGYWGQRLLWELGGYVAV-YPPTAH------------------------
>GT75|XP_009061393.1|Mollusca_Metazoa Lottia gigantea;-;Uncharacterized protein (Fragment)
IVVTSLSSP-TSDIYYLANI------TG-WKLLVLGEEKTSNWSNV----NCHFLSYNDRENELKGSYSRKTLGYLYAIVNGAQVIYATDDNYRPTDNTNFNLETMEGMSGQNLFN--AYSHFPKGFPYHVGKFTTPSIQQSLVNGDPFSSQNTLFLYDAFWALVLP-ISTSFG----SDIWKNYWAQRLLWEIGGNVGFYPPNGIRKRNT-ESHIEDAKYESTSKLIEF-
>GT75|XP_010649270.1|Streptophyta_Viridiplantae Vitis vinifera;-;PREDICTED: probable UDP-arabinopyranose mutase 5 isoform X2
IVIGALHAD---LTSFLNEWRPL--FSR-FHLIIVKDPDLREELKIPEGFNLHVYTKSDIDRVVFSGYSCRYFGYLMSR---KKYIFSVDDDCIPAKDDDAVDQHITNLATPFFFNTL-YDPFVRGYPFSLRSGVTCALSCGLWLNLPVSGVNIAFNRELAPALFPG-LRLAAGKLRWEDIWCGLCVKVVCDHLGLGVKTGLPYVWRNDRG--NAIESLKKEWMEEVVPFD
>GT77|AAC72867.1|Streptophyta_Viridiplantae Arabidopsis thaliana;RGXT1;UDP-D-xylose:L-fucose alpha-1,3-D-xylosyltransferase 1 (EC 2.4.2.-) (Rhamnogalacturonan xylosyltransferase 1)
VIVCAVSSPFPFLNNWLISVSRQKHDK--VLVIAEDYITLYKVNEKWPHALIPPALDFSFGSQGFNFTARRPQHLLQILE-LGYNVMYNDVDMVWLQDPFLYLEG-SHD-AYFTDDMHDLP--HPDRNGET----------------YICSCMIYLRPTNGAKLLMKKWSEELQAKANDQPAFNLALNKAHQVDL--YLLSQVAIVHNNYIIGYDRKMKRFQD--Y----G
>GT77|AAF63177.1|Streptophyta_Viridiplantae Arabidopsis thaliana;-;Glycosyltransferase (Nucleotide-diphospho-sugar transferase family protein) (T5E21.9)
VVLTTLNAAWAVIDLFFESFRIGELDH--LVIVALDAKAYSRCLELHKHCSLVTEGFAYFMTRSLKMMWRRIDLLRSVLE-MGYNFVFTDADVMWFRNPFPRFYM-YAD-FQIACDHYLGR--SNDLHN------------------RPNGGFNFVRSNNRTILFYKYWYASRFPGYHDQDVLNFLKAEPFGLKM--RFLNTAYTMHANCCYGMESKLHDLRI--M----L
>GT77|AAG22833.1|Streptophyta_Viridiplantae Arabidopsis thaliana;-;Expressed protein (F1K23.10) (Glycosyltransferase) (Nucleotide-diphospho-sugar transferase family protein)
VIIAMVNKAYEMLDLFLESFWEGELNH--LMVVAADQTAYDRCLFRRLHCKMDTEGVKVYMSKDIEMMWRRTRLLLDVLS-RGYHIIFTDTDVMWLRSPLSRLNV-SLD-MHISVD----R--NNVRGQ------------------LINTGFYHARSNNKTISLFQKWYDMRSLGMKEQDVLKNLLDSGFGLNV--GFLSTAETVHANCCVHIPAKISDLSL--A----L
>GT77|AAG51917.1|Streptophyta_Viridiplantae Arabidopsis thaliana;RRA2;Arabinosyltransferase RRA2 (EC 2.4.2.-) (Protein REDUCED RESIDUAL ARABINOSE 1)
IIVVLANSNVPMLELQIASVKRVGIQN--YLIVALDDSMESFCESKEVVFKRDPDKAVG-KSGGHAVSGLKFRVLREFLQ-LGYSVLLSDVDIVFLQNPFSHLHR-DSD-VESMSDGHDNN--TAYRIW------------------VFNSGFFYLRPTIPSIDLLDRVADTLSE-AWDQAVFNEQLFYPSHASK--RVMDMYEIVHLNYHPD---KLERMHA--V-----
>GT77|AAG51930.1|Streptophyta_Viridiplantae Arabidopsis thaliana;RRA1;Arabinosyltransferase RRA1 (EC 2.4.2.-) (Protein REDUCED RESIDUAL ARABINOSE 1)
IIVVLANNNVPMLEVQIASVKRVGIQN--YLVVPLDDSLESFCKSNEVAYKRDPDN-VVGKSRRSDVSGLKFRVLREFLQ-LGYGVLLSDVDIVFLQNPFGHLYR-DSD-VESMSDGHDNN--TAYRIW------------------VFNSGFFYLRPTLPSIELLDRVTDTLS-GGWDQAVFNQHLFYPSHASK--RVMDVYEIIHMNYHSD---KLERMQA--A-----
>GT77|AAG52325.1|Streptophyta_Viridiplantae Arabidopsis thaliana;RAY1;Beta-arabinofuranosyltransferase RAY1 (EC 2.4.2.-) (Protein REDUCED ARABINOSE YARIV 1)
VVLSVAGYSYDMLMSWVCRLRRLKVPN--FLVCALDDETYQFSILQGLPVFDPYNISCHFGSKCQRVTKVKSRTVLKILK-LGYNVLLSDVDVYWFRNPLPLLFG-PSV-LAAQSDEYNTT--APNRPR------------------RLNSGFYFARSDSPTIAAMEKVVKHAS-GLSEQPSFYDTLCGEGGLTV--QFLDRELVLHNNWISGRLKKLER-----------
>GT77|AAL67023.1|Streptophyta_Viridiplantae Arabidopsis thaliana;XG113;Arabinosyltransferase XEG113 (EC 2.4.2.-) (Protein LATERAL ROOT DEVELOPMENT 5) (Xyloglucanase 113)
IIVTFGNYAFDFILTWVKHLTDLDLSN--ILVGAMDTKLLEALYWKGVPVDMGSHMSVGWGSPTHKMGREKVILIDSVLP-FGYELLMCDTDMVWLKNPMPYLFP-DAD-VLTSSDQVVPT--VQQVGA------------------AYNIGIFHWRPTESAKKLAKEWKEILDDKVWDQNGFNEIVRRQLGLKV--GILPASIAVHTTFQYGTEGKRHRLRE--------
>GT77|AAM14318.1|Streptophyta_Viridiplantae Arabidopsis thaliana;-;F1K23.9 (Glycosyltransferase) (Nucleotide-diphospho-sugar transferase family protein)
VIIAMVNKAYEMLDLFLESFWEGELDH--LMLVAADQTSYDRCLFRRLHCKMDTDGVKVYMSKDIEMMWRRTHLLLDVLS-RGYNLTFTDTDVMWLRSPFPRLNE-SLD-MQISVDSI-----GLVGGH------------------LINTGFYHVRSNNKTISLFQKWYDMRSTGMKEQDVLKSLLDSGFGLNV--GFLNTTETVHANCCRHILAKISDLTL--V----L
>GT77|AAM61239.1|Streptophyta_Viridiplantae Arabidopsis thaliana;-;Regulatory protein
VIITTLNQAWELFDLFLESFRIGRLKH--VVVVCLDIKAFQRCSQLHTNCHIETSEFKVYNTPDLKMMWARIELLTQVLQ-MGFNFIFTDADIMWLRDPFPRLYP-DGD-FQMACDRFFGN--PYDSDN------------------WVNGGFTYVRSNNRSIEFYKFWHKSRYPDLHDQDVFNRIKHEPFGIQM--RFFDTVYTMHANCCIGLDKKLHDLNL--V----L
>GT77|AAM65662.1|Streptophyta_Viridiplantae Arabidopsis thaliana;RRA3;Arabinosyltransferase RRA3 (EC 2.4.2.-) (Protein REDUCED RESIDUAL ARABINOSE 3)
VIVALANANVAMLEVQIASIKRVGITN--YLVVALDDYIENLCKENDVAYKRDPDKDVG-KTGGHAVSGLKFRVLREFLQ-LGYGVLLSDVDIVFLQNPFSHLYR-DSD-VESMSDGHDNH--TAYRIW------------------VFNSGFFYLRPTIPSIELLDRVADRLA-KVWDQAVFNEELFYPSHASK--RVMDMYEIVHVNYHPD---KLNRMQA--V-----
>GT77|BAC42064.1|Streptophyta_Viridiplantae Arabidopsis thaliana;RGXT3;UDP-D-xylose:L-fucose alpha-1,3-D-xylosyltransferase 3 (EC 2.4.2.-) (Rhamnogalacturonan xylosyltransferase 3)
VIVCAVSYPFPFLNNWLISISRQKHEK--VLVIAEDYATLYKVNEKWPHALIPPALDHKFGSQGFNLTSRRPQHLLNILE-LGYNVMYNDVDMVWLQDPFDYLQG-SYD-AYFMDDMIAIKPLSRSGVT------------------YVCSCMIFLRSTDGGKLLMKTWVEEIQPWNHDQPAFNRALHKANQVKV--YLLPQSAIVHNNYIIGYDKKMKRFQD--------
>GT77|CAB77745.1|Streptophyta_Viridiplantae Arabidopsis thaliana;RGXT2;UDP-D-xylose:L-fucose alpha-1,3-D-xylosyltransferase (EC 2.4.2.-) (Rhamnogalacturonan xylosyltransferase 2)
VIVCAVSSPFPFLNNWLISVSRQKHEK--VLVIAEDYITLYKVNEKWPHALIPPALDASFGSQGFNFTARRPQHLLQILE-LGYNVMYNDVDMVWLQDPFQYLEG-SHD-AYFTDDMHDLP--APDGET------------------YICSCMIYLRPTNGAKLLMKKWSEELQAKANDQPAFNLALNKAHQVDL--YLLSQVAIVHNNYIIGYDRKMRRFQD--Y----G
>GT77|CAB78997.1|Streptophyta_Viridiplantae|1 Arabidopsis thaliana;-;Glycosyltransferase (EC 2.4.2.-)
VIVTTLNQAWELFDLFLESFRIGQLQH--VVVVCLDSKAFARCSQLHPNCYLKTTGFKLFATPDLKMMWRRIELLTQVLE-MGYNFIFTDADIMWLRDPFPRLYP-DGD-FQMACDRFFGD--PHDSDN------------------WVNGGFTYVKSNHRSIEFYKFWYNSRYPKMHDQDVFNQIKHKEIGIQM--RFFDTVYTMHANCCVGLAKKLHDLNL--V----L
>GT77|CAB78997.1|Streptophyta_Viridiplantae|2 Arabidopsis thaliana;-;Glycosyltransferase (EC 2.4.2.-)
VIITALNQAWETFDVFRESFKVGLLKH--VIAVCLDIKAYDQCLKVHPHCLIDSDQLNRFMTPGLKLIWRRMDLLRQVIG-LGYNFIFTDADILWLRDPFPRFFP-DAD-FQITCDDYNGR--PSDKKN------------------HVNSGFTYVKANNKTSKFYKYWIRSSFPGKHDQDVFNFIKNDLHGIKM--RFFDTVYTMHANCCIGLDNKVNNLKA--A----L
>GT77|CAB80931.1|Streptophyta_Viridiplantae Arabidopsis thaliana;MGP4;UDP-D-xylose:L-fucose alpha-1,3-D-xylosyltransferase MGP4 (EC 2.4.2.-) (Protein MALE GAMETOPHYTE DEFECTIVE 4) (Rhamnogalacturonan xylosyltransferase MGP4)
VIVCAVSYPYPFLNNWLISVSRQKHDQ--VLVIAEDYATLYKVNEKWPHALIPPALDAHFGSQGFNFTARRPQHLLEILE-LGYNVMYNDVDMVWLQDPFQYLEG-KHD-AYFMDDMTAIK--PLDGRT------------------YICSCMIFLRPTNGAKLLMKKWIEELQPKANDQPGFNWALNKANQVDM--YLLSQAAIIHNNYIVGFEKKIKRFRD--------
>GT77|CDH59920.1|Mucoromycota_Fungi Lichtheimia corymbifera JMRC:FSU:9682;-;Uncharacterized protein
LIVAAANYGMEYVYNWIESLKRTGEDR--FLVFCLDDQLYSHMVAAGYEQAATIPRSEEYYSIKRIITHAKTLIVQQLLY-MDVTVLFSDVDVVWLRPRLDFMLT-FLQ-IRSKTQAIFQQ--EGTDQK------------------VINSGFYLMRPSDDMKRLLAETIYLADKTLTQQGAMNAALDELRSTGV--VLLDILHMVHANYLVGDD-KRKQLED--K----G
>GT77|ELU07133.1|Annelida_Metazoa Capitella teleta;-;Uncharacterized protein
ILLVYADLGVDMALSFYESLKKHGIEN--YLFVTSSSAMCQEFHLMNIPCQFTNNSNASFGSTAKEKMNIRTFMVLHALK-EGYNVLHSDCDVYYFANPFPVIKE-LCG-SE--CDV------APLWDYV-----------------THNAGFLYTRSTTMGIALYKNMEHTA-TGRDDQSALKTAVCTKNGLRL--VSLPTEQVAHNNWIKGIEAKEYRFKE--M-----
>GT77|ESQ16925.1|Proteobacteria_Bacteria uncultured Thiohalocapsa sp. PB-PSB1;-;Uncharacterized protein
VILTFSNQVYPILENWLTAMHRIGIDN--ILVVTLDEPTQRQMHTPGALCLLLCE-------DDSALWHRRVALFVAIVQ-RGYHLNNSDVDVVWLKDPRPEFQL-GSD-ADI---VFSQG--TERWQF------------------ILCCSLFFLRATGPVRAFMRHWPAH-SDSGDDQVSFDLLL--------------------------------------------
>GT77|NP_001118253.1|Streptophyta_Viridiplantae Arabidopsis thaliana;-;Nucleotide-diphospho-sugar transferase family protein
VILTTLNEAWAVIDLFFESFRIGKLKH--LVIIALDAKAYSRCQELHKHCRLETEGVAYFMTPSLTMMWRRISFLRSVLE-KGYNFVFTDADVMWFRNPFRRFYE-DGD-FQIACDHYIGR--PNDFRN------------------RPNGGFTFVRANNRSIGFYKFWYDSRYPKNHDQDVLNFIKTDPFRIRI--RFLNTVYTMHANCCFGLDSKLHDLRI--M----L
>GT77|NP_198906.2|Streptophyta_Viridiplantae Arabidopsis thaliana;-;Glycosyltransferase (Nucleotide-diphospho-sugar transferase family protein)
VIITMVDREWKILDLFLESVRIGELNH--LIVVALDDQALRYCLRAHPHCLHRYSRKSL--KPDLVTGWNKKSLVKEILE-LGYHIMFTEADVMWLRNPLMHCNP-QNA-ISVACGNIDHQ--HDHLTT------------------ENTGGFFYAKSNDITIDMFNILNVERYPATGNQSLCDIVKREDVDKKV--TFLDDANTVHASCCHDTKSKVRYLKL--L----L
>GT77|NP_567479.5|Streptophyta_Viridiplantae Arabidopsis thaliana;Y4597;Uncharacterized protein At4g15970
VIITTLNKAWETFDLFLHSFHVGKLRH--LVVACLDEEAYSRCSEVHPHCFMKTPGFKMFMTPDLKMMWRRIEFLGTLLK-LRYNFIFT--------IPFPRLSK-EVD-FQIACDRYSGD--DKDIHN------------------AVNGGFTFVKANQRTIDFYNYWYMSRYPDRHDQDVLDQIKGGGYGLKM--RFLDTKYTMHANCCVGLENKIKDLRQ--V----I
>GT77|NP_973933.1|Streptophyta_Viridiplantae Arabidopsis thaliana;-;Glycosyltransferase (Fragment)
VIITMVNKAYKMLDLFLESFWEGELDH--LMVVAVDQTAYDRCRFKRLHCKMETEDGKVFMSKDIEMMWRRTRLILDVLR-RGYNVIFTDTDVMWLRSPLSRLNM-SLD-MQISVDRIN------VGGQ------------------LINTGFYHVRSNNKTISLFQKWYDMRSTGMKEQDVLKNLLDSGFGLNV--GFLSTTETVHANCCLHIPAKVFDLTR--V----L
>GT77|XP_002270793.2|Streptophyta_Viridiplantae Vitis vinifera;-;PREDICTED: uncharacterized protein At4g15970-like
VILTTVNEAWALLDLFLESFRIGNLNH--LVIITLDPKAYARCTTLHPHCALKTKEFAFFMSHDLEMMWRRIDFLRSVLK-MRYNFIFTDADIMWFRDPFQRFDS-KAD-FQIACDYFNGN--SSDVNN------------------SPNGGFTYVKSNDRTIKFYKFWYSSRYPGNHDQDVLNKIKHDPFGLKM--RFLDTAYTMHANCCVGLGNKIHDLGI--M----L
>GT77|XP_002290922.1|Stramenopiles_Protista Thalassiosira pseudonana;-;Uncharacterized protein
VVVLTCNHGQELLLNFVCSSKARGFDN--VLVFPTDIETKELAEGMGLATYEEKIMANYYGDKITRVMFAKVVCVQLVNE-LGKDLLFQDVDVVWYQNPLEYFHD-SSD-IYFQDDGSRQ---ERYAPY------------------SANSGFYFVRSNDKTKYLFRSLLYSSNKWYSHQQVLIALLSETSGLTV--KILSMEEIFHMSWTNNKDNKLKFFQQ--M----G
>GT77|XP_002506735.1|Chlorophyta_Viridiplantae Micromonas commoda;-;Glycosyltransferase family 77 protein
VMVTWANHHYDFVRNWVRNVRKCGMRN--YMVGAMDNELLEKLIDDEVPTAMQSGLTFGWGTANHKMGRKKIELIHLFTE-MGFDILVSDVDTVWLRNPLPYMYP-HAD-VLTSSDHLAND--PRKAHS------------------AANIGIMLLRDT--AKELAKEWVDVLDDKVWDQNVFNDLYRRGGGLKV--GILPVSMVVHATFQYGTEGKRHRMRE--A----L
>GT77|XP_010028572.1|Streptophyta_Viridiplantae Eucalyptus grandis;-;Glycosyltransferase (EC 2.4.2.-)
LIVALANSNVEMLEVWFTNIKRVGVLN--YLVVALDEDIAKFCEANSVPVKRDPDKDSVGRTGGHAVSGLKFRILREFLQ-LGYSVLLSDVDIVYLQNPFNHLYR-DSD-VESMTDGHDNR--TAYRIW------------------VYNSGFFYIRPTIPSIELLDR-VAGRRENAWDQAVFNEELFFPSHSGYDGRTMDFYLIVHVNYHPD---KLPRMKA--V-----
>GT77|YP_009052451.1|Phycodnaviridae_Virus Aureococcus anophagefferens virus;-;Putative fucosylgalactoside 3-alpha-galactosyltransferase
-LITLTNTGYHFTVNLLESMRKLNIDH--LLIYCIGSECFEFFTEFYPNNIIQIDSSEKWGKKKADLTSHKFACIQREFD-AGNNVIFTDGDIVFEKNPIPYMNK-FAD-TDMEFVCQNDC--CDGSRE------------------MFCTGFFFFKCTENTKKIVDFKTIQSDSFQNDQQYLRR-KAKL--MKY--SYLDLNLIIHFNYDVG-SAKIRRMK---------
>GT78|AAM93991.1|Rhodophyta_Protista Griffithsia japonica;-;Mannosylglycerate synthase (Fragment)
VCFPFKKEH-VPTVLRNVEIAANHPAV--SLVLLAGA-CANDCFSEVAKASSSVPVRTEVQERLAGKGDGMNSAMRYFLTAEAERLHFYDADIESFADWITKAEGGRRAGL--------RRR------APLLPALLHRRTGHLGRSPSPGSSSPSAASSASHALLSRH---------------------------------------------------------------
>GT78|AIC73644.1|Rhodophyta_Protista Caloglossa leprieurii;-;Mannosylglycerate synthase (EC 2.4.1.269)
VCFPFKKEH-IPTVLRNVEIATNHPNV--SIVLLAAA-CSNDCFHEISKASSDVPVRVEVQERLPGKGDGMNSALRYFMKATLQRIHFYDADIESFKAWITKAEEGTSLGYDVVRHYFPRSS------TDAQVTWQVTKVGFALLWPQPLGGELCFTRRVVEKLLSDQRVVRQ-SNWGIDTL-YTFVCAQNGYSLLEMPQGK-M--HALGG-LRDLKTMLCECFAAVQS-L
>GT78|WP_014066868.1|Bacteroidetes_Bacteria Rhodothermus marinus;-;Uncharacterized protein
VVFPFKHEH-PEVLLHNVRVAAAHPRV--HEVLCIGY-EREQTYEAVERAATGTPVSVRLQERLPGKGDGMNTALRYFLEERWERIHFYDADITSFPDWITKAEEAADFGYGLVRHYFPRAS------TDAMITWMITRTGFALLWPQPLGGELLMRREVAAMLYEDERVRRR-SDWGIDTL-YTFVTVQQGVSIYEIPEGK-A--HRLGG-LDDLRTMLVECFAVIQS-L
>GT78|XP_001764114.1|Streptophyta_Viridiplantae Physcomitrella patens subsp. patens;-;Predicted protein
VCFPFKEED-VAVVVGNIECAASHPRV--AAILCVGY-SQGETWHAIEAAATGKEIFLVLQRRIGGKGDGMNTALAFFLEKVYPRLHFYDADIVSFGEWISKAEKQADLDYDIVRHYFPRSS------TDAMITWLVTKLGFAMLWPQPLGGELLLTKKAAEVLYGDHRVRSQ-SDWGIDTL-YTFVTAQAGLRLAEISEGK-V--HALGG-LRDLRTMLVECFSAVQS-L
>GT78|XP_002978745.1|Streptophyta_Viridiplantae Selaginella moellendorffii;-;Glycosyltransferase in CAZy family GT78 (EC 2.4.1.-)
VCFPFKEED-VAVVVRNVECAAAHPRV--STVLCVGY-SKGETWCAIEAKSTGKRIILLQQKRISGKGDGMNTALAYFLDHELKRIHFYDSDIVSFADWITKAERQADLDFDVVRHYFPRSS------TDAMITWFVTKIGFCLLWPQPLGGELLLTRKAAEALYTDHRVRGQ-SDWGIDTL-YTFIMVQKGLHLAEIPEGK-V--HALSG-LRDLRTMLVECFSAMQS-L
>GT81|ERG90383.1|Euryarchaeota_Archaea Haloquadratum walsbyi J07HQW1;-;Uncharacterized protein
VVVP-MTER-EYAGLAADRVLSTLEDLDPARVIVVSSATYELTLEVLWCD----GPRVATLLE-SGKGRDVWLALGAA---EEEFVVVHDADTVSYSSFLTRLLFPL--HGFEFTKGYYAR--VEDRQLYGRLFRLFYIPLIRALRAYALAGEFAATADMITQIRAPR-------SWGLEIGTLADAFDTAGFAHTAVDLGRYE--HDHRA-----VTGLSEMSRSVGET-
>GT81|WP_014143196.1|Actinobacteria_Bacteria Streptomyces cattleya;-;Putative glucosyl-3-phosphoglycerate synthase
VVLPALDEE-ATVGAIVEEIRGALMTPLVDELVVMDSGSTDATAEVAAAA----GARVVHRDDVPGKGEVLWRSLLVT---RGEIVCFVDADLRDFARFVYGIVGPLLTPGIALVKAMYDRPLAVVAHGGGRVTELVARPLLNLHWPQPLGGEYAGRRSLLERLPFPV-------GYGVELGMLVDALELVGLDALAVDVGVRR--HRHQD-----GPALGRMAATIYRTF
>GT81|WP_016956884.1|Proteobacteria_Bacteria Catenovulum agarivorans;-;glycosyl transferase
LVLPSLYSE-LQGPALANIINELAEVPYLNQIVIGLDRATEDEYRHALKFFSKLGPRLQKIDALPGKGRNVWYCLGYV---LGSSVALHDCDILTYRKLLARLIYPV-APTFNYCKGYYAR----VADGNGRVSRLLVTPLLRALKKYPLAGEFSFRTDVINDIRIPS-------DWGLEIGVLSEMERNYSTNRLCVDIDTYD--HKHQS-----LSGLSKMSIDISKA-
>GT81|WP_028321107.1|Proteobacteria_Bacteria Desulfatiglans anilini;-;glycosyltransferase
VGIPCFNND-KTIGHVIQMVTHGLAAHYQDKRSVIDGGSTDDSREAAREF----EIKPW-QEKIGGKGSAL-RSLFEA---AYRLKVMVDSDLRSIPDWVKYLIDPVL-KGYQFVAPVYVR-----HKWDGTITNNIVYNLTRALYGQPIGGDFALSRDVAKYYTDVA-------RFGIDIWMTVSAVTR-GF-RICSNLGVKI--HDKDP-----GQHLGPMFRQVLSA-
>GT81|WP_048194744.1|Euryarchaeota_Archaea Methanococcoides methylutens;-;Glucosyl-3-phosphoglycerate synthase
----------------------------------------------------------------KGKGKDVWLATGIA---TLDAIAYHDADIVTYKDFPAKLLYPIV-PELNFFKGYYAR--METKTMHGRVFRLFVRPLLDTLQAYTLAGEFAMTSDLAMNIRIPA-------DWGLEVGLLAEVYRNTTTKKICTDLGYYD--HKHQD-----VEGLCKMVGDIFTT-
>GT82|WP_002870498.1|Proteobacteria_Bacteria Campylobacter jejuni;-;Beta-1,4-N-acetylgalactosaminyltransferase (CgtA)
AFIRVKNEA-ITLKASLESILPAIQRG----VI-GYNDCTDGSEEIILEFC-KQYPSFIPIKYPNKLYSYYNYVASFIP--KDEWLIKIDVDHIYDKKLYKSF--YIPKNKYDVVSYSRVDIHKDNNGNILKEPGDCLLINNY----NLKWKEVLIDRINNNK-KATKQSF----SSNIHSLEQLKYKHRILFHTE---LN-NY--HFP-------FLKKH-RAQDIYKYN
>GT82|WP_005958834.1|Fusobacteria_Bacteria Fusobacterium necrophorum;-;beta-1,4-N-acetylgalactosaminyltransferase CgtA
AFVRAKNEI-KTIESCLNSILPVIQKG----VI-GYNKLKDGTEAFILDFC-KKNPGFIPFQYENRLDTYYNAVLSKLP--KNVWMMKIDCDHVFDEKLVQLP--YLIKEDKDMLSFTRMNLH---NIYTIAAPDDWLLLKNT----NLVFKFSSGYKENGS----FAWEY----LEN--ETEDLFFQRKIYY-TD---LI-SW--HFP-------FMK------------
>GT82|WP_047115763.1|Spirochaetes_Bacteria Brachyspira hyodysenteriae;-;glycosyltransferase
--LRVKDEA-MSLAECIDSCIDALDEL----II-TYNKSTDNTEEILKEYA-QKYPDKIRLYYPHHLCNYYNYGYIKI---KYKYYMKIDADQIYFDKLLS-----IRKALFKDISKEISELIIRKIRSILRYKKEKKLLNKI-----LNSNYIDLDKISDYK-LIIRKSC----YFSLGGINLIKFNNKLCLNT------------------------------------
>GT82|WP_050550067.1|Proteobacteria_Bacteria Helicobacter pylori;-;hypothetical protein
AFIRVKNEI-VTLEESLFSMLPAIQRG----VI-GFNDCDDGSKEVILEFC-KKFPSFIPISYPHQLYHYSNYTLSFIP--KNEWVVKIDCDHIYDKKLYESF--YIPKSIKEVVMYSRINFVNSGDFGFLDAWGDWLFYNDC----EPFWQH---------N-GEVLEIW----QHNDDIYEILKLKDKHHIDKE---LM-QW--HFP-------LAKKR-RNAIVYD--
>GT82|XP_001316819.1|Parabasalia_Protista Trichomonas vaginalis;-;Beta-1, 4-N-acetylgalactosaminyltransferase/CMP-Neu5Ac synthetase fusion protein, putative
AFIRVKDEI-NTIEASLNSLIPALKKG----VI-GYVNSTDGTNKVILNFC-RQHPTFIPIKYDNRLDSYYNYVYKFIP--DNEWLIRIDADQIYDEKLYMLT--FLPDNDIEAIPIFRINLHKNGYG----------PFSYV----NDQW---LLKKTNGSF-TMHIDNN----SREA--WELLYPAPPTNTQTD---II-AW--HFP-------FLKHW-R--------
>GT84|GAA58074.1|Platyhelminthes_Metazoa Clonorchis sinensis;-;Glucans biosynthesis glucosyltransferase H (Fragment)
-------------------------------------------------------------------------------------MVVLDADSVMTGDCLCGLVRLMEAPNAGIIQSSPKAS-GMDTLYARCQQFATRVYGPLFTAGHYWGHNAIIRVKPFIEHCALASFAG--SILSHDFVEAALMRRAGWGVWI-AYDLPGS-YEELPPNLLDELKRDRRWCHGNLM-N
>GT84|KJK90816.1|Ascomycota_Fungi Metarhizium anisopliae BRIP 53284;-;hypothetical protein H633G_05291
LVICMCNEDPSRLHAMRESLLQTGRLQY-FRFIILSDTSRPDMEMEKGFADLAKSLGSPLYRRRGYKAGNIKDYVDNHSE-GDDLFVTLDSDSAMGGDVLVRLVSSMEKAQIGLLQTQFAGM-PAVSTFTRLWQFGLRYSVPVQNVGFYWGHNAIIRTRAFHKHCMLPPLGG--HILSHDVIEGMFMRRAGYEVRM-IPLETES-YETNPPTLLDFLRREHRWCQGTMQ-Y
>GT84|WP_010041290.1|Planctomycetes_Bacteria Gemmata obscuriglobus;-;glycosyl transferase family 36
-------ESAERLELHYLA----NPDPQ-FRFALLTDWADADALVKAAGIRKLNERHKLFHRKRSRKRGKLDEFNRLLKG-DYRFVLTLDADTVLPRDAARRLVATL-APGYGILQPRVSFLYGLRSLFARI--FAGSAGDPYSSAS--WGTKGLYDLEAFHATA---FPEN--SILSHDLIESNF-ARCG----L-VTDVEV--FDDFPAKYHAYAKREHRWVRGDWQ--
>GT84|WP_037016169.1|Proteobacteria_Bacteria Rhizobiales bacterium YIM 77505;-;glucans biosynthesis glucosyltransferase MdoH
IVMPVYNESSAAIEAIRESIEATGLGAH-FDYFVLSDSTNADWIAERAFLALREKLGRIFYRHRHRKSGNIADFVTRWGG-AYEHMIVLDADSLMTGECIVRLAAAMEAPDAGIIQTLPLIV-NRNTLFARAQQFAARVYGPVIASGNYWGHNAIIRTRAFAAHCGLPPLGG--HILSHDFVEAALMRRAGWAVYM-LPHLPGS-YEESPPSLIDVAARDRRWCQGNLQ-H
>GT84|XP_003026669.1|Basidiomycota_Fungi Schizophyllum commune;-;Glyco_trans_2-like domain-containing protein
------------------------------------DVEHPAESLERALQMAIEETER---RFKNARASRIGEII-----------LIVDSDTVVPEDCLRDAAREMREPTVAIIQSDVMQV-AHHYFENGIAYFTRRINRCISMACPFVGHNAFLRWQAIQDAAFVDIWSE--SNVSEDFDMALRLLMRGYIIWA-TYSLGGF-KEGVSLSVDDELNRWQKYAYG-----
>GT88|ACB05473.1|Proteobacteria_Bacteria Legionella pneumophila;-;Glucosyltransferase Lgt2
FCIWFSNNPNPKKIKDLEERAKQNAP----GVTVCSRALTKKENTNFVQWAKENGITLLDLDELAASDLVRWISG------VIGDIAYVDADMPMLTNK-------SIKSEEVYAGHPVLLN-MGSALVKDMENV------------AFNTDIIFTGKIAQSIGNYLHLPMLRVMEFSGPSAVTREILPLLPTGT---RYIENLAGKTNFT-----SDN-------IP--N
>GT88|CEG56091.1|Proteobacteria_Bacteria Legionella fallonii LLAP-10;-;Uncharacterized protein
VKIWLSNKPANTENKMLIEMRELNPK----DVIVYDSSLNTKALDELAAFCKEHAITPVDANSFVASDILRWLYP------VYSKGGYTDFDVPVDTSA-------LP--ETVNVHTPLLLN-IGSLRTRNKDVI------------LSNNDYIVVDEVQEGIQQYDNFI---VVCTTGPIAIAKFLFDGYVFNS---DNFDEEGLKSAFQ-----SKN-------TI--S
>GT88|WP_010947098.1|Proteobacteria_Bacteria Legionella pneumophila;-;Glucosyltransferase Lgt1
TSIWFSIKPDPSKQQELKRRREQYPG----CEIIYSSSLNAEANRQMKAFARKQNISLIDIDSVAASDLCRWIPE------LFNEGFYVDIDLPVDSSK-------IVEGHQITGGVPIMLN-MGSIISEPQEAV------------CMNTDIIYSNDVARYKNIYDDIFDLRVEEISGPGAIYNALGGAGSFTTTH-RRLTGPHDKGPFV-----SDN-------IA--R
>GT88|WP_014326918.1|Proteobacteria_Bacteria Legionella pneumophila;-;coiled-coil-containing protein
FSVWFSNNPAPQHVKTVEKTAKLNQP----GKTVFSSLLNETAQIDFQQWAKENNIELVDIDSIAASDLVRWVDV------IIGESTYIDIDLPMNDKK-------VTV--EVHSGFPVLLN-MGSALTKDMENP------------AFNTDMIYSKEVAKKIARYENLCTLRVMEFSGPSAVSSSWVEAISGRSIP-RNFEYLSGKANFS-----SDN-------IP--K
>GT88|WP_050805599.1|Proteobacteria_Bacteria Legionella drancourtii;-;hypothetical protein
-KIWLSNNPDNLENQVLVKMREKNPK----DEIIYDSTLNSKAINELNAFCNEHKLSSLDANSFVASDILRWLHP------VYEKKTYTDFDFPVDTTS-------LPS--TIEIEAPLLLN-IGSLRMGKQEFI------------LSNNDYVVVDEIQQGIKNYDTRNML-VVCTTGPIQISNALFGGYVVDSGAFKNVQPLNLQKAFR-----SQN-------SI--P
