# Supplementary material for: Deep evolutionary analysis reveals the design principles of fold A glycosyltransferases
Source: eLife journal article supplement (doi:10.7554/elife.54532), 2020-04-01
Supplement: supp [file elife-54532-supp-v1.zip › elife_poa_e54532_Figure_6_source_data_1.xlsx]

## Sheet: Sheet1
Figure 6-source data 1: List of the 713 training dataset sequences used for machine learning. The "Assigned Donor Class" column indicates one of the 6 classes the donor belongs to.
Mechanism	GT-A Family	GenBankID	UniProtID	Donor Sugar	Assigned Donor Class	Protein Name	Organism
Inverting	GT12	AAA35516	Q00973	GalNAc	GalNAc	B4GN1_HUMAN	Homo sapiens (Human)
Inverting	GT12	AAA39802.1	Q09199	GalNAc	GalNAc	B4GN2_MOUSE	Mus musculus (Mouse)
Inverting	GT12	AAA65027.1	Q09200	GalNAc	GalNAc	B4GN1_MOUSE	Mus musculus (Mouse)
Inverting	GT12	AAH81799.1	Q10468	GalNAc	GalNAc	B4GN1_RAT	Rattus norvegicus (Rat)
Inverting	GT12	AAM34756	Q8NHY0	GalNAc	GalNAc	B4GN2_HUMAN	Homo sapiens (Human)
Inverting	GT12	EAP99589.1	A3TMI4	GalNAc	GalNAc	A3TMI4_9MICO	Janibacter sp. HTCC2649
Inverting	GT12	WP_011572713.1	Q18EK2	GalNAc	GalNAc	Q18EK2_HALWD	Haloquadratum walsbyi (strain DSM 16790 / HBSQ001)
Inverting	GT12	XP_005762785.1	R1DHS6	GalNAc	GalNAc	R1DHS6_EMIHU	Emiliania huxleyi (Pontosphaera huxleyi)
Inverting	GT12	XP_006823617.1	A0A0U2IDP4	GalNAc	GalNAc	A0A0U2IDP4_SACKO	Saccoglossus kowalevskii (Acorn worm)
Inverting	GT12	XP_007422112.1	UPI0004418B86	GalNAc	GalNAc	-	Python bivittatus (Burmese python) (Python molurus bivittatus)
Inverting	GT13	AAA31493.1	P27115	GlcNAc	GlcNAc	MGAT1_RABIT	Oryctolagus cuniculus (Rabbit)
Inverting	GT13	AAA75523.1	P26572	GlcNAc	GlcNAc	MGAT1_HUMAN	Homo sapiens (Human)
Inverting	GT13	AAC52872.1	P70680	GlcNAc	GlcNAc	P70680_CRIGR	Cricetulus griseus (Chinese hamster) (Cricetulus barabensis griseus)
Inverting	GT13	AAD03022.1	Q11068	GlcNAc	GlcNAc	MGAT1_CAEEL	Caenorhabditis elegans
Inverting	GT13	AAD03024.1	G5EFK6	GlcNAc	GlcNAc	G5EFK6_CAEEL	Caenorhabditis elegans
Inverting	GT13	AAD04130.1	Q9Z264	GlcNAc	GlcNAc	Q9Z264_MESAU	Mesocricetus auratus (Golden hamster)
Inverting	GT13	AAF57454.1	Q60GL7	GlcNAc	GlcNAc	Q60GL7_DROME	Drosophila melanogaster (Fruit fly)
Inverting	GT13	AAH11201.1	Q91X88	GlcNAc	GlcNAc	PMGT1_MOUSE	Mus musculus (Mouse)
Inverting	GT13	AAH74010.1	Q09325	GlcNAc	GlcNAc	MGAT1_RAT	Rattus norvegicus (Rat)
Inverting	GT13	AAN15653.1	Q9XGM8	GlcNAc	GlcNAc	MGAT1_ARATH	Arabidopsis thaliana (Mouse-ear cress)
Inverting	GT13	ADN68540.1	G0WVT5	GlcNAc	GlcNAc	G0WVT5_PHATR	Phaeodactylum tricornutum (Diatom)
Inverting	GT13	BAB71960.1	Q8WZA1	GlcNAc	GlcNAc	PMGT1_HUMAN	Homo sapiens (Human)
Inverting	GT13	CAA58809.1	Q90W57	GlcNAc	GlcNAc	Q90W57_XENLA	Xenopus laevis (African clawed frog)
Inverting	GT13	CAB53347.1	Q9ST97	GlcNAc	GlcNAc	Q9ST97_TOBAC	Nicotiana tabacum (Common tobacco)
Inverting	GT13	CAB70462.1	UPI0000030D35	GlcNAc	GlcNAc	-	Solanum tuberosum (Potato)
Inverting	GT13	CAC51119.1	Q90W56	GlcNAc	GlcNAc	Q90W56_XENLA	Xenopus laevis (African clawed frog)
Inverting	GT13	CAC82507.1	Q8GUA5	GlcNAc	GlcNAc	Q8GUA5_NICBE	Nicotiana benthamiana
Inverting	GT13	CCD71300.1	G5EBG7	GlcNAc	GlcNAc	G5EBG7_CAEEL	Caenorhabditis elegans
Inverting	GT13	NP_034924.1	P27808	GlcNAc	GlcNAc	MGAT1_MOUSE	Mus musculus (Mouse)
Inverting	GT14	AAA35919.1	Q02742	GlcNAc	GlcNAc	GCNT1_HUMAN	Homo sapiens (Human)
Inverting	GT14	AAA60948.1	Q09324	GlcNAc	GlcNAc	GCNT1_MOUSE	Mus musculus (Mouse)
Inverting	GT14	AAA81777.1	Q8N0V5	GlcNAc	GlcNAc	GNT2A_HUMAN	Homo sapiens (Human)
Inverting	GT14	AAA83244.1	Q92180	GlcNAc	GlcNAc	GCNT1_BOVIN	Bos taurus (Bovine)
Inverting	GT14	AAB39621.1	P97402	GlcNAc	GlcNAc	GCNT2_MOUSE	Mus musculus (Mouse)
Inverting	GT14	AAD10824.1	O95395	GlcNAc	GlcNAc	GCNT3_HUMAN	Homo sapiens (Human)
Inverting	GT14	AAF63156.1	Q9P109	GlcNAc	GlcNAc	GCNT4_HUMAN	Homo sapiens (Human)
Inverting	GT14	AAF72001.1	Q9IZK2	GlcNAc	GlcNAc	GCNT3_BHV4V	Bovine herpesvirus 4 (strain V. test) (BoHV-4) (Movar virus)
Inverting	GT14	AAK72480.1	Q5JCT0	GlcNAc	GlcNAc	GCNT3_MOUSE	Mus musculus (Mouse)
Inverting	GT14	AAL50561.1	Q8WXK7	GlcNAc	GlcNAc	Q8WXK7_HUMAN	Homo sapiens (Human)
Inverting	GT14	AAO22165.1	Q7YQE1	GlcNAc	GlcNAc	GCNT3_BOVIN	Bos taurus (Bovine)
Inverting	GT14	BAB03495.1	A2IQH4	GlcNAc	GlcNAc	A2IQH4_MOUSE	Mus musculus (Mouse)
Inverting	GT14	BAB03496.1	A2IQH5	GlcNAc	GlcNAc	A2IQH5_MOUSE	Mus musculus (Mouse)
Inverting	GT14	AAK68509.2	Q965Q8	Xyl	Others	XYLT_CAEEL	Caenorhabditis elegans
Inverting	GT14	AAM14996.1	Q8S8P3	GlcA	Others	GT14C_ARATH	Arabidopsis thaliana (Mouse-ear cress)
Inverting	GT14	AAT44331.1	Q6IVU9	Xyl	Others	Q6IVU9_CHICK	Gallus gallus (Chicken)
Inverting	GT14	AAT44332.1	Q6IVU8	Xyl	Others	Q6IVU8_CHICK	Gallus gallus (Chicken)
Inverting	GT14	BAB10223.1	Q9FLD7	GlcA	Others	GT14A_ARATH	Arabidopsis thaliana (Mouse-ear cress)
Inverting	GT14	CAC01824.1	Q9LFQ0	GlcA	Others	GT14B_ARATH	Arabidopsis thaliana (Mouse-ear cress)
Inverting	GT14	CAC16788.1	Q9H1B5	Xyl	Others	XYLT2_HUMAN	Homo sapiens (Human)
Inverting	GT14	CAC16796.2	Q9EPI0	Xyl	Others	XYLT2_RAT	Rattus norvegicus (Rat)
Inverting	GT14	CAC16797.1	Q9EPI1	Xyl	Others	XYLT1_RAT	Rattus norvegicus (Rat)
Inverting	GT14	CAC18567.2	Q9EPL0	Xyl	Others	XYLT2_MOUSE	Mus musculus (Mouse)
Inverting	GT14	CAD23246.1	Q7KVA1	Xyl	Others	XYLT_DROME	Drosophila melanogaster (Fruit fly)
Inverting	GT14	CAD62248.1	Q86Y38	Xyl	Others	XYLT1_HUMAN	Homo sapiens (Human)
Inverting	GT14	CAD62249.1	Q811B1	Xyl	Others	XYLT1_MOUSE	Mus musculus (Mouse)
Inverting	GT16	AAA86721.1	Q09326	GlcNAc	GlcNAc	MGAT2_RAT	Rattus norvegicus (Rat)
Inverting	GT16	AAF71273	Q9NGK7	GlcNAc	GlcNAc	Q9NGK7_CAEEL	Caenorhabditis elegans
Inverting	GT16	AAH06390	Q10469	GlcNAc	GlcNAc	MGAT2_HUMAN	Homo sapiens (Human)
Inverting	GT16	AAX53005	Q59DT4	GlcNAc	GlcNAc	Q59DT4_DROME	Drosophila melanogaster (Fruit fly)
Inverting	GT16	CAA70732.1	O19071	GlcNAc	GlcNAc	MGAT2_PIG	Sus scrofa (Pig)
Inverting	GT16	CAC08806	Q9FT88	GlcNAc	GlcNAc	MGAT2_ARATH	Arabidopsis thaliana (Mouse-ear cress)
Inverting	GT16	EFA75769.1	D3BS32	GlcNAc	GlcNAc	D3BS32_POLPP	Polysphondylium pallidum (strain ATCC 26659 / Pp 5 / PN500) (Heterostelium pallidum)
Inverting	GT16	XP_005989562.1	UPI0003C15977	GlcNAc	GlcNAc	-	Latimeria chalumnae (Coelacanth)
Inverting	GT16	XP_007215589.1	M5X5I2	GlcNAc	GlcNAc	M5X5I2_PRUPE	Prunus persica (Peach) (Amygdalus persica)
Inverting	GT16	XP_008200361.1	D7EJQ1	GlcNAc	GlcNAc	D7EJQ1_TRICA	Tribolium castaneum (Red flour beetle)
Inverting	GT17	AAB71422.1	Q10470	GlcNAc	GlcNAc	MGAT3_MOUSE	Mus musculus (Mouse)
Inverting	GT17	AAD20428	Q9SKF0	GlcNAc	GlcNAc	Q9SKF0_ARATH	Arabidopsis thaliana (Mouse-ear cress)
Inverting	GT17	AAD31053	Q9SAD5	GlcNAc	GlcNAc	Q9SAD5_ARATH	Arabidopsis thaliana (Mouse-ear cress)
Inverting	GT17	AAE54797.1	Q09327	GlcNAc	GlcNAc	MGAT3_HUMAN	Homo sapiens
Inverting	GT17	AAF01546	Q9SS93	GlcNAc	GlcNAc	Q9SS93_ARATH	Arabidopsis thaliana (Mouse-ear cress)
Inverting	GT17	AAF16573	Q9C9V4	GlcNAc	GlcNAc	Q9C9V4_ARATH	Arabidopsis thaliana (Mouse-ear cress)
Inverting	GT17	AAI54149.1	A8KBK5	GlcNAc	GlcNAc	A8KBK5_DANRE	Danio rerio (Zebrafish) (Brachydanio rerio)
Inverting	GT17	AAL28965	Q95RF3	GlcNAc	GlcNAc	Q95RF3_DROME	Drosophila melanogaster (Fruit fly)
Inverting	GT17	AEE77161	F4JCJ4	GlcNAc	GlcNAc	F4JCJ4_ARATH	Arabidopsis thaliana (Mouse-ear cress)
Inverting	GT17	BAA02937	Q09327	GlcNAc	GlcNAc	MGAT3_HUMAN	Homo sapiens (Human)
Inverting	GT17	BAB01284	Q9LT58	GlcNAc	GlcNAc	Q9LT58_ARATH	Arabidopsis thaliana (Mouse-ear cress)
Inverting	GT17	CAB87787	Q9LY81	GlcNAc	GlcNAc	Q9LY81_ARATH	Arabidopsis thaliana (Mouse-ear cress)
Inverting	GT17	CDO68468.1	A0A060S7U7	GlcNAc	GlcNAc	A0A060S7U7_PYCCI	Pycnoporus cinnabarinus (Cinnabar-red polypore) (Trametes cinnabarina)
Inverting	GT17	CEO97803.1	A0A0G4IR06	GlcNAc	GlcNAc	A0A0G4IR06_PLABS	Plasmodiophora brassicae (Clubroot disease)
Inverting	GT17	KDR75747.1	A0A067T092	GlcNAc	GlcNAc	A0A067T092_GALM3	Galerina marginata (strain CBS 339.88)
Inverting	GT17	WP_029231926.1	UPI000406F98A	GlcNAc	GlcNAc	-	Butyrivibrio sp. VCB2006
Inverting	GT17	XP_005646672.1	I0YUQ9	GlcNAc	GlcNAc	I0YUQ9_COCSC	Coccomyxa subellipsoidea (strain C-169) (Green microalga)
Inverting	GT17	XP_006369937.1	U5GVD1	GlcNAc	GlcNAc	U5GVD1_POPTR	Populus trichocarpa (Western balsam poplar) (Populus balsamifera subsp. trichocarpa)
Inverting	GT17	XP_006666195.1	G3J7E8	GlcNAc	GlcNAc	G3J7E8_CORMM	Cordyceps militaris (strain CM01) (Caterpillar fungus)
Inverting	GT17	XP_013392821.1	-	GlcNAc	GlcNAc	-	Lingula anatina
Inverting	GT21	AAC48147.3	G5EC84	Glc	Glc	CGT2_CAEEL	Caenorhabditis elegans
Inverting	GT21	AAD02464.1	Q9R0E0	Glc	Glc	CEGT_RAT	Rattus norvegicus (Rat)
Inverting	GT21	AAF46795.1	Q9W297	Glc	Glc	Q9W297_DROME	Drosophila melanogaster (Fruit fly)
Inverting	GT21	AAH38711.1	Q16739	Glc	Glc	CEGT_HUMAN	Homo sapiens (Human)
Inverting	GT21	AAH50828.1	O88693	Glc	Glc	CEGT_MOUSE	Mus musculus (Mouse)
Inverting	GT21	AAK13500.1	Q9C3Y5	Glc	Glc	Q9C3Y5_PNECA	Pneumocystis carinii
Inverting	GT21	AAK31533.1	Q21054	Glc	Glc	CGT3_CAEEL	Caenorhabditis elegans
Inverting	GT21	AAK73019.1	G4MS28	Glc	Glc	CEGT_MAGO7	Magnaporthe oryzae (strain 70-15 / ATCC MYA-4617 / FGSC 8958) (Rice blast fungus) (Pyricularia oryzae)
Inverting	GT21	AAL42806.1	A0A0F4FTE6	Glc	Glc	A0A0F4FTE6_RHIRD	Rhizobium radiobacter (Agrobacterium tumefaciens) (Agrobacterium radiobacter)
Inverting	GT21	AAM49061.1	Q8AY29	Glc	Glc	CEGTA_XENLA	Xenopus laevis (African clawed frog)
Inverting	GT21	BAB52059.1	Q98BB3	Glc	Glc	Q98BB3_RHILO	Mesorhizobium japonicum (strain LMG 29417 / CECT 9101 / MAFF 303099) (Mesorhizobium loti (strain MAFF 303099))
Inverting	GT21	CAY70399.1	C4R4B3	Glc	Glc	CEGT_KOMPG	Komagataella phaffii (strain GS115 / ATCC 20864) (Yeast) (Pichia pastoris)
Inverting	GT25	AAA68010.1	Q50947	Gal	Gal	LGTB_NEIGO	Neisseria gonorrhoeae
Inverting	GT25	AAA68013.1	Q50950	Gal	Gal	LGTE_NEIGO	Neisseria gonorrhoeae
Inverting	GT25	AAD07876.1	O25500	Gal	Gal	O25500_HELPY	Helicobacter pylori (strain ATCC 700392 / 26695) (Campylobacter pylori)
Inverting	GT25	AAF32397.1	Q9L7A4	Gal	Gal	Q9L7A4_HAEDC	Haemophilus ducreyi
Inverting	GT25	AAG60609.1	Q8IYK4	Gal	Gal	GT252_HUMAN	Homo sapiens (Human)
Inverting	GT25	AAP96480.1	G1UBB0	Gal	Gal	G1UBB0_HAEDU	Haemophilus ducreyi (strain 35000HP / ATCC 700724)
Inverting	GT25	AAX58721.1	Q2TIJ3	Gal	Gal	Q2TIJ3_NEIME	Neisseria meningitidis
Inverting	GT25	AAZ29051.1	A1BLM1	Gal	Gal	A1BLM1_MORCA	Moraxella catarrhalis (Branhamella catarrhalis)
Inverting	GT25	ABG48522.1	Q0ZB17	Gal	Gal	Q0ZB17_HAEIF	Haemophilus influenzae
Inverting	GT25	ABG48525.1	Q0ZAZ2	Gal	Gal	Q0ZAZ2_HAEIF	Haemophilus influenzae
Inverting	GT25	ABG48526.1	Q0ZAZ2	Gal	Gal	Q0ZAZ2_HAEIF	Haemophilus influenzae
Inverting	GT25	NP_078932.2	Q8NBJ5	Gal	Gal	GT251_HUMAN	Homo sapiens (Human)
Inverting	GT25	ABO88296.1	A4SHC4	GalNAc	GalNAc	A4SHC4_AERS4	Aeromonas salmonicida (strain A449)
Inverting	GT25	AAC22423.1	Q57125	Glc	Glc	Y765_HAEIN	Haemophilus influenzae (strain ATCC 51907 / DSM 11121 / KW20 / Rd)
Inverting	GT25	AAM33309.1	Q8L2H6	Glc	Glc	Q8L2H6_HAEIF	Haemophilus influenzae
Inverting	GT25	AAV50503.1	Q5UQC3	Glc	Glc	PLOD_MIMIV	Acanthamoeba polyphaga mimivirus (APMV)
Inverting	GT25	ABG48517.1	Q0ZB13	Glc	Glc	Q0ZB13_HAEIF	Haemophilus influenzae
Inverting	GT25	ACL81526.1	B8RG40	Xyl	Others	B8RG40_9BURK	Burkholderia contaminans
Inverting	GT2-B3GntL	AAT47555	Q67FW5	GlcNAc	GlcNAc	B3GNL_HUMAN	Homo sapiens (Human)
Inverting	GT2-B3GntL	KFP15026.1	A0A091JTV1	GlcNAc	GlcNAc	A0A091JTV1_EGRGA	Egretta garzetta (Little egret)
Inverting	GT2-B3GntL	XP_007512589.1	K8EGR3	GlcNAc	GlcNAc	K8EGR3_9CHLO	Bathycoccus prasinos
Inverting	GT2-B3GntL	XP_009829183.1	W4GNN4	GlcNAc	GlcNAc	W4GNN4_9STRA	Aphanomyces astaci
Inverting	GT2-B3GntL	XP_011680845.1	UPI0000E486DC	GlcNAc	GlcNAc	-	Strongylocentrotus purpuratus (Purple sea urchin)
Inverting	GT2-Bre3	AAB49734.1	O01346	Man	Man	EGH_DROME	Drosophila melanogaster (Fruit fly)
Inverting	GT2-Bre3	CEL99845.1	A0A0G4EQD8	Man	Man	A0A0G4EQD8_VITBC	Vitrella brassicaformis (strain CCMP3155)
Inverting	GT2-Bre3	KJY44855.1	A0A0F4KEP3	Man	Man	A0A0F4KEP3_9ACTN	Streptomyces sp. NRRL S-444
Inverting	GT2-Bre3	KND04364.1	A0A0L0HU09	Man	Man	A0A0L0HU09_SPIPD	Spizellomyces punctatus (strain DAOM BR117)
Inverting	GT2-Bre3	NP_499087	Q03562	Man	Man	BRE3_CAEEL	Caenorhabditis elegans
Inverting	GT2-Bre3	WP_049911327.1	UPI000677C33D	Man	Man	-	Halorubrum coriense
Inverting	GT2-Bre3	XP_003079088.1	Q01A30	Man	Man	Q01A30_OSTTA	Ostreococcus tauri
Inverting	GT2-Bre3	XP_975496.1	D2A043	Man	Man	D2A043_TRICA	Tribolium castaneum (Red flour beetle)
Inverting	GT2-CeS	AAA85264.1	Q59167	Glc	Glc	ACSA2_KOMHA	Komagataeibacter hansenii (Gluconacetobacter hansenii)
Inverting	GT2-CeS	AAC41436.1	Q44418	Glc	Glc	Q44418_RHIRD	Rhizobium radiobacter (Agrobacterium tumefaciens) (Agrobacterium radiobacter)
Inverting	GT2-CeS	AAC76558.2	P37653	Glc	Glc	BCSA_ECOLI	Escherichia coli (strain K12)
Inverting	GT2-CeS	AAD20440.2	Q9X2V0	Glc	Glc	Q9X2V0_9RHIZ	Agrobacterium sp. ATCC 31749
Inverting	GT2-CeS	AAF00200.1	Q9U720	Glc	Glc	DCSA_DICDI	Dictyostelium discoideum (Slime mold)
Inverting	GT2-CeS	AAF26119.1	Q9M9M4	Glc	Glc	CSLD3_ARATH	Arabidopsis thaliana (Mouse-ear cress)
Inverting	GT2-CeS	AAL25132.1	Q84S11	Glc	Glc	CSLF2_ORYSJ	Oryza sativa subsp. japonica (Rice)
Inverting	GT2-CeS	AAQ41476.1	O82859	Glc	Glc	BCSA2_KOMXY	Komagataeibacter xylinus (Gluconacetobacter xylinus)
Inverting	GT2-CeS	AAR89623.1	Q6RCS2	Glc	Glc	Q6RCS2_CIOSA	Ciona savignyi (Pacific transparent sea squirt)
Inverting	GT2-CeS	AAT48372.1	Q6GVL8	Glc	Glc	Q6GVL8_PHYPA	Physcomitrella patens subsp. patens (Moss)
Inverting	GT2-CeS	AAY87028.1	A0PJ42	Glc	Glc	A0PJ42_OENOE	Oenococcus oeni (Leuconostoc oenos)
Inverting	GT2-CeS	ABA79509.1	Q3J125	Glc	Glc	Q3J125_RHOS4	Rhodobacter sphaeroides (strain ATCC 17023 / 2.4.1 / NCIB 8253 / DSM 158)
Inverting	GT2-CeS	ABP96902.1	A5A5Z3	Glc	Glc	A5A5Z3_PHYIN	Phytophthora infestans (Potato late blight fungus) (Botrytis infestans)
Inverting	GT2-CeS	ABP96903.1_2	A5A5Z4	Glc	Glc	A5A5Z4_PHYIN	Phytophthora infestans (Potato late blight fungus) (Botrytis infestans)
Inverting	GT2-CeS	ABP96903.1	A5A5Z4	Glc	Glc	A5A5Z4_PHYIN	Phytophthora infestans (Potato late blight fungus) (Botrytis infestans)
Inverting	GT2-CeS	ABP96905.1	A5A5Z6	Glc	Glc	A5A5Z6_PHYIN	Phytophthora infestans (Potato late blight fungus) (Botrytis infestans)
Inverting	GT2-CeS	ACN67534.1	C3U576	Glc	Glc	C3U576_HORVV	Hordeum vulgare subsp. vulgare (Domesticated barley)
Inverting	GT2-CeS	ADD84672.1	D4N2S7	Glc	Glc	D4N2S7_PLAVT	Plasmopara viticola (Downy mildew of grapevine) (Botrytis viticola)
Inverting	GT2-CeS	BAA18254.1	P74165	Glc	Glc	BMGDS_SYNY3	Synechocystis sp. (strain PCC 6803 / Kazusa)
Inverting	GT2-CeS	BAB01433.1	Q9LJP4	Glc	Glc	CSLC4_ARATH	Arabidopsis thaliana (Mouse-ear cress)
Inverting	GT2-CeS	BAB76632.1	Q8YMK0	Glc	Glc	BMGDS_NOSS1	Nostoc sp. (strain PCC 7120 / SAG 25.82 / UTEX 2576)
Inverting	GT2-CeS	BAC66734.1	Q84UP7	Glc	Glc	CSLF6_ORYSJ	Oryza sativa subsp. japonica (Rice)
Inverting	GT2-CeS	BAC83321.1	Q6ZF86	Glc	Glc	CSLF4_ORYSJ	Oryza sativa subsp. japonica (Rice)
Inverting	GT2-CeS	BAJ61012.1	E5RST0	Glc	Glc	E5RST0_THEVL	Thermosynechococcus vulcanus RKN
Inverting	GT2-CeS	CAB51329.1	Q9X9S1	Glc	Glc	Q9X9S1_STREE	Streptococcus pneumoniae
Inverting	GT2-CeS	CAO99134.1	B4ERA8	Glc	Glc	B4ERA8_PROFR	Propionibacterium freudenreichii subsp. shermanii
Inverting	GT2-CeS	EAL86644.1	Q4WF33	Glc	Glc	Q4WF33_ASPFU	Neosartorya fumigata (strain ATCC MYA-4609 / Af293 / CBS 101355 / FGSC A1100) (Aspergillus fumigatus)
Inverting	GT2-CeS	PNR44324.1	A0A2K1JS17	Glc	Glc	A0A2K1JS17_PHYPA	Physcomitrella patens subsp. patens (Moss)
Inverting	GT2-CeS	AAL24081.1	Q9ZQN8	Man	Man	CSLA7_ARATH	Arabidopsis thaliana (Mouse-ear cress)
Inverting	GT2-CeS	AAO42230.1	Q84W54	Man	Man	CSLA1_ARATH	Arabidopsis thaliana (Mouse-ear cress)
Inverting	GT2-CeS	AFV79650.1	K7RDG8	Man	Man	K7RDG8_TRIFG	Trigonella foenum-graecum (Fenugreek)
Inverting	GT2-CeS	CAB82941.1	Q9LZR3	Man	Man	CSLA9_ARATH	Arabidopsis thaliana (Mouse-ear cress)
Inverting	GT2-Chitin-HAS	AAA34491.1	P08004	GlcNAc	GlcNAc	CHS1_YEAST	Saccharomyces cerevisiae (strain ATCC 204508 / S288c) (Baker's yeast)
Inverting	GT2-Chitin-HAS	AAA34493.1	P14180	GlcNAc	GlcNAc	CHS2_YEAST	Saccharomyces cerevisiae (strain ATCC 204508 / S288c) (Baker's yeast)
Inverting	GT2-Chitin-HAS	AAB59308.2	P30572	GlcNAc	GlcNAc	CHS2_CANAX	Candida albicans (Yeast)
Inverting	GT2-Chitin-HAS	AAB60781.1	P78746	GlcNAc	GlcNAc	CHSD_ASPFU	Neosartorya fumigata (strain ATCC MYA-4609 / Af293 / CBS 101355 / FGSC A1100) (Aspergillus fumigatus)
Inverting	GT2-Chitin-HAS	AAB84285.1	O13395	GlcNAc	GlcNAc	CHS6_USTMA	Ustilago maydis (strain 521 / FGSC 9021) (Corn smut fungus)
Inverting	GT2-Chitin-HAS	AAC49743.1	P48017	GlcNAc	GlcNAc	CHS_SAPMO	Saprolegnia monoica
Inverting	GT2-Chitin-HAS	AAF82801.1	Q9P442	GlcNAc	GlcNAc	Q9P442_COCPO	Coccidioides posadasii (Valley fever fungus)
Inverting	GT2-Chitin-HAS	AAO30659.1	Q00757	GlcNAc	GlcNAc	CHSB_EMENI	Emericella nidulans (strain FGSC A4 / ATCC 38163 / CBS 112.46 / NRRL 194 / M139) (Aspergillus nidulans)
Inverting	GT2-Chitin-HAS	AAO37822.1	G1UAP4	GlcNAc	GlcNAc	G1UAP4_CANAX	Candida albicans (Yeast)
Inverting	GT2-Chitin-HAS	AAW19636.1	Q5IFQ8	GlcNAc	GlcNAc	Q5IFQ8_ENTIV	Entamoeba invadens
Inverting	GT2-Chitin-HAS	AAY86556.1	Q288C6	GlcNAc	GlcNAc	Q288C6_ATRRI	Atrina rigida (Stiff penshell) (Pinna rigida)
Inverting	GT2-Chitin-HAS	ABI96087.1	Q06BR7	GlcNAc	GlcNAc	Q06BR7_SPOEX	Spodoptera exigua (Beet armyworm) (Noctua fulgens)
Inverting	GT2-Chitin-HAS	BAA01023.1	P30594	GlcNAc	GlcNAc	CHS1_RHIOL	Rhizopus oligosporus (Rhizopus microsporus var. oligosporus)
Inverting	GT2-Chitin-HAS	BAA01024.1	P30595	GlcNAc	GlcNAc	CHS2_RHIOL	Rhizopus oligosporus (Rhizopus microsporus var. oligosporus)
Inverting	GT2-Chitin-HAS	BAA21714.1	O13281	GlcNAc	GlcNAc	O13281_EMEND	Emericella nidulans (Aspergillus nidulans)
Inverting	GT2-Chitin-HAS	BAA74449.1	O93809	GlcNAc	GlcNAc	O93809_MAGGR	Magnaporthe grisea (Crabgrass-specific blast fungus) (Pyricularia grisea)
Inverting	GT2-Chitin-HAS	BAB83509.1	Q8V735	GlcNAc	GlcNAc	Q8V735_9PHYC	Chlorella virus
Inverting	GT2-Chitin-HAS	BAB88208.1	Q8TF96	GlcNAc	GlcNAc	Q8TF96_ASPOZ	Aspergillus oryzae (Yellow koji mold)
Inverting	GT2-Chitin-HAS	CAA21311.1	O74756	GlcNAc	GlcNAc	CHS2_SCHPO	Schizosaccharomyces pombe (strain 972 / ATCC 24843) (Fission yeast)
Inverting	GT2-Chitin-HAS	CAA21947.1	Q9URM1	GlcNAc	GlcNAc	Q9URM1_CANAX	Candida albicans (Yeast)
Inverting	GT2-Chitin-HAS	CAA61027.1	Q99126	GlcNAc	GlcNAc	CHS3_USTMA	Ustilago maydis (strain 521 / FGSC 9021) (Corn smut fungus)
Inverting	GT2-Chitin-HAS	CAA61028.1	Q99127	GlcNAc	GlcNAc	CHS4_USTMA	Ustilago maydis (strain 521 / FGSC 9021) (Corn smut fungus)
Inverting	GT2-Chitin-HAS	CAA67797.1	Q12632	GlcNAc	GlcNAc	CHS1_MUCCL	Mucor circinelloides f. lusitanicus (Mucor racemosus var. lusitanicus)
Inverting	GT2-Chitin-HAS	CAA70433.1	Q92444	GlcNAc	GlcNAc	CHS2_PARBR	Paracoccidioides brasiliensis
Inverting	GT2-Chitin-HAS	CAA91105.1	P30597	GlcNAc	GlcNAc	CHS1_SCHPO	Schizosaccharomyces pombe (strain 972 / ATCC 24843) (Fission yeast)
Inverting	GT2-Chitin-HAS	CAA96688.1	G5ECD6	GlcNAc	GlcNAc	CHS1_CAEEL	Caenorhabditis elegans
Inverting	GT2-Chitin-HAS	XP_365117.1	O13353	GlcNAc	GlcNAc	CHS4_MAGO7	Magnaporthe oryzae (strain 70-15 / ATCC MYA-4617 / FGSC 8958) (Rice blast fungus) (Pyricularia oryzae)
Inverting	GT2-CHS	AAL95439.1	Q8R632	Gal	Gal	Q8R632_FUSNN	Fusobacterium nucleatum subsp. nucleatum (strain ATCC 25586 / CIP 101130 / JCM 8532 / LMG 13131)
Inverting	GT2-CHS	AAD45263.1	Q9XC63	Glc	Glc	Q9XC63_PSEAI	Pseudomonas aeruginosa
Inverting	GT2-CHS	ABA41511.1	H2K893	Glc	Glc	VALG_STRHJ	Streptomyces hygroscopicus subsp. jinggangensis (strain 5008)
Inverting	GT2-CHS	AAK24398.1	Q9A5M0	GlcNAc	GlcNAc	Q9A5M0_CAUVC	Caulobacter vibrioides (strain ATCC 19089 / CB15) (Caulobacter crescentus)
Inverting	GT2-Class1	AAC27537.1	Q03084	Gal	Gal	WBBD_ECOLX	Escherichia coli
Inverting	GT2-Class1	AAF31770.1	Q9K2V8	Gal	Gal	Q9K2V8_CAMJU	Campylobacter jejuni
Inverting	GT2-Class1	AAK91724.1	Q93MQ1	Gal	Gal	Q93MQ1_CAMJU	Campylobacter jejuni
Inverting	GT2-Class1	AAR90893.1	Q5J7C7	Gal	Gal	Q5J7C7_ECOLX	Escherichia coli
Inverting	GT2-Class1	AAT77180.1	Q697D6	Gal	Gal	Q697D6_ECOLX	Escherichia coli
Inverting	GT2-Class1	APK80341.1	UPI000540DF01	Gal	Gal	-	Escherichia coli
Inverting	GT2-Class1	BAA82284.1	O87183	Gal	Gal	O87183_STRAG	Streptococcus agalactiae
Inverting	GT2-Class1	BAB21602.1	Q9AQI9	Gal	Gal	Q9AQI9_STRAG	Streptococcus agalactiae
Inverting	GT2-Class1	BAG11838.1	B1B4J9	Gal	Gal	B1B4J9_ECOLX	Escherichia coli O55:H7
Inverting	GT2-Class1	CAB73394.1	A0A2X2RQ22	Gal	Gal	A0A2X2RQ22_CAMJU	Campylobacter jejuni
Inverting	GT2-Class1	CAC07466.1	UPI0000031D7B	Gal	Gal	-	Lactobacillus helveticus (Lactobacillus suntoryeus)
Inverting	GT2-Class1	CAC07467.1	UPI000011D964	Gal	Gal	-	Lactobacillus helveticus (Lactobacillus suntoryeus)
Inverting	GT2-Class1	CAH07088.1	Q5LFK5	Gal	Gal	Q5LFK5_BACFN	Bacteroides fragilis (strain ATCC 25285 / DSM 2151 / JCM 11019 / NCTC 9343)
Inverting	GT2-Class1	AAA68012.1	Q50949	GalNAc	GalNAc	Q50949_NEIGO	Neisseria gonorrhoeae
Inverting	GT2-Class1	AAC23227.1	Q57287	GalNAc	GalNAc	Y1578_HAEIN	Haemophilus influenzae (strain ATCC 51907 / DSM 11121 / KW20 / Rd)
Inverting	GT2-Class1	AAM90646.1	Q8KWR0	GalNAc	GalNAc	Q8KWR0_CAMJU	Campylobacter jejuni
Inverting	GT2-Class1	AAN05638.1	Q8GNC0	GalNAc	GalNAc	Q8GNC0_HAEDC	Haemophilus ducreyi
Inverting	GT2-Class1	BAD02449.1	Q6L9W6	GalNAc	GalNAc	B4GN3_HUMAN	Homo sapiens (Human)
Inverting	GT2-Class1	BAD06471.1	Q76KP1	GalNAc	GalNAc	B4GN4_HUMAN	Homo sapiens (Human)
Inverting	GT2-Class1	AAA16045.1	P33695	Glc	Glc	EXOM_RHIME	Rhizobium meliloti (strain 1021) (Ensifer meliloti) (Sinorhizobium meliloti)
Inverting	GT2-Class1	AAA16046.1	P33691	Glc	Glc	EXOA_RHIME	Rhizobium meliloti (strain 1021) (Ensifer meliloti) (Sinorhizobium meliloti)
Inverting	GT2-Class1	AAC44061.1	P74820	Glc	Glc	P74820_9SPHN	Sphingomonas sp. S88
Inverting	GT2-Class1	AAK75839.1	A0A0H2UR96	Glc	Glc	GLYG_STRPN	Streptococcus pneumoniae serotype 4 (strain ATCC BAA-334 / TIGR4)
Inverting	GT2-Class1	ABB29913.1	Q077R2	Glc	Glc	WFAP_ECOLX	Escherichia coli
Inverting	GT2-Class1	ACI39394.1	UPI00000D00E2	Glc	Glc	-	Escherichia coli
Inverting	GT2-Class1	CAA80359.1	P33700	Glc	Glc	EXOU_RHIME	Rhizobium meliloti (strain 1021) (Ensifer meliloti) (Sinorhizobium meliloti)
Inverting	GT2-Class1	CAA80361.1	P33702	Glc	Glc	EXOW_RHIME	Rhizobium meliloti (strain 1021) (Ensifer meliloti) (Sinorhizobium meliloti)
Inverting	GT2-Class1	CAA87699.1	Q56914	Glc	Glc	Q56914_YEREN	Yersinia enterocolitica
Inverting	GT2-Class1	CAA87700.1	Q56915	Glc	Glc	Q56915_YEREN	Yersinia enterocolitica
Inverting	GT2-Class1	CAB44443.1	Q9XBL5	Glc	Glc	Q9XBL5_KOMXY	Komagataeibacter xylinus (Gluconacetobacter xylinus)
Inverting	GT2-Class1	CAB73383.1	UPI0009A6B60B	Glc	Glc	-	Campylobacter jejuni
Inverting	GT2-Class1	AAC44084.1	Q51115	GlcNAc	GlcNAc	Q51115_NEIME	Neisseria meningitidis
Inverting	GT2-Class1	ABQ02267.1	A5HJW9	GlcNAc	GlcNAc	A5HJW9_AGGAC	Aggregatibacter actinomycetemcomitans (Actinobacillus actinomycetemcomitans) (Haemophilus actinomycetemcomitans)
Inverting	GT2-Class1	ACV90435.1	C8YYH7	GlcNAc	GlcNAc	C8YYH7_ACIBA	Acinetobacter baumannii
Inverting	GT2-Class1	BAA33749.1	O87182	GlcNAc	GlcNAc	O87182_STRAG	Streptococcus agalactiae
Inverting	GT2-Class1	BAB56420.1	A0A0H3JPC6	GlcNAc	GlcNAc	TARS_STAAM	Staphylococcus aureus (strain Mu50 / ATCC 700699)
Inverting	GT2-Class1	CAA59781.1	O07339	GlcNAc	GlcNAc	O07339_STREE	Streptococcus pneumoniae
Inverting	GT2-Class1	AAC44058.1	P74817	Rham	Others	P74817_9SPHN	Sphingomonas sp. S88
Inverting	GT2-Class1	AAC98401.1	Q52256	ManNAc	Others	Q52256_9ZZZZ	Plasmid pWQ799
Inverting	GT2-Class1	AAD20376.1	Q7BR87	Fuc	Others	Q7BR87_MYCAV	Mycobacterium avium
Inverting	GT2-Class1	AAG04094.1	Q9I5M1	Rham	Others	Q9I5M1_PSEAE	Pseudomonas aeruginosa (strain ATCC 15692 / DSM 22644 / CIP 104116 / JCM 14847 / LMG 12228 / 1C / PRS 101 / PAO1)
Inverting	GT2-Class1	AAG08385.1	Q9HUG5	Rham	Others	Q9HUG5_PSEAE	Pseudomonas aeruginosa (strain ATCC 15692 / DSM 22644 / CIP 104116 / JCM 14847 / LMG 12228 / 1C / PRS 101 / PAO1)
Inverting	GT2-Class1	AAX20106.1	Q4QTM5	GlcA	Others	Q4QTM5_KLEPN	Klebsiella pneumoniae
Inverting	GT2-Class1	CAA50773.1	P37783	Rham	Others	RFBG_SHIFL	Shigella flexneri
Inverting	GT2-Class1	CAA54709.1	Q47330	GlcA	Others	Q47330_ECOLX	Escherichia coli
Inverting	GT2-CWR	AAC62210.1	O87342	Glc	Glc	O87342_BRAJP	Bradyrhizobium japonicum
Inverting	GT2-CWR	AAG04552.1	Q9I4H4	Glc	Glc	Q9I4H4_PSEAE	Pseudomonas aeruginosa (strain ATCC 15692 / DSM 22644 / CIP 104116 / JCM 14847 / LMG 12228 / 1C / PRS 101 / PAO1)
Inverting	GT2-CWR	AAM73205.1	Q8KB11	Glc	Glc	Q8KB11_CHLTE	Chlorobaculum tepidum (strain ATCC 49652 / DSM 12025 / NBRC 103806 / TLS) (Chlorobium tepidum)
Inverting	GT2-CWR	AAN67147.1	Q88MP4	Glc	Glc	Q88MP4_PSEPK	Pseudomonas putida (strain ATCC 47054 / DSM 6125 / NCIMB 11950 / KT2440)
Inverting	GT2-CWR	ACO80054.1	C1DSW1	Glc	Glc	C1DSW1_AZOVD	Azotobacter vinelandii (strain DJ / ATCC BAA-1303)
Inverting	GT2-CWR	BAF68735.1	Q53590	Glc	Glc	CRTQ_STAAE	Staphylococcus aureus (strain Newman)
Inverting	GT2-CWR	AAD52055.1	Q9RQP9	GlcNAc	GlcNAc	ICAA_STAA8	Staphylococcus aureus (strain NCTC 8325)
Inverting	GT2-CWR	AAW53175.1	Q5HKQ0	GlcNAc	GlcNAc	ICAA_STAEQ	Staphylococcus epidermidis (strain ATCC 35984 / RP62A)
Inverting	GT2-CWR	ABX18163.1	UPI0000E9623B	GlcNAc	GlcNAc	-	Burkholderia multivorans (strain ATCC 17616 / 249); Burkholderia multivorans
Inverting	GT2-DPs	ABK89440.1	A0Q5C5	GalNAc	GalNAc	A0Q5C5_FRATN	Francisella tularensis subsp. novicida (strain U112)
Inverting	GT2-DPs	AAC39272.1	P68668	Glc	Glc	GTRB_BPSF2	Shigella phage SfII (Shigella flexneri bacteriophage II) (Bacteriophage SfII)
Inverting	GT2-DPs	AAD41465.1	Q9Y673	Glc	Glc	ALG5_HUMAN	Homo sapiens (Human)
Inverting	GT2-DPs	AAF22454.1	Q9T1D6	Glc	Glc	GTRB_BPSFX	Shigella phage SfX (Shigella flexneri bacteriophage X) (Bacteriophage SfX)
Inverting	GT2-DPs	AAF52633.1	Q9VLQ1	Glc	Glc	ALG5_DROME	Drosophila melanogaster (Fruit fly)
Inverting	GT2-DPs	ABK90273.1	A0Q7Q8	Glc	Glc	A0Q7Q8_FRATN	Francisella tularensis subsp. novicida (strain U112)
Inverting	GT2-DPs	BAA10834.1	Q55487	Glc	Glc	Y501_SYNY3	Synechocystis sp. (strain PCC 6803 / Kazusa)
Inverting	GT2-DPs	BAC11844.1	Q8KZ90	Glc	Glc	Q8KZ90_STRMG	Streptococcus mutans
Inverting	GT2-DPs	CAA54680.1	P40350	Glc	Glc	ALG5_YEAST	Saccharomyces cerevisiae (strain ATCC 204508 / S288c) (Baker's yeast)
Inverting	GT2-DPs	CAC49484.1	P33697	Glc	Glc	EXOO_RHIME	Rhizobium meliloti (strain 1021) (Ensifer meliloti) (Sinorhizobium meliloti)
Inverting	GT2-DPs	NP_466073.1	Q93RN0	GlcNAc	GlcNAc	Q93RN0_LISMN	Listeria monocytogenes
Inverting	GT2-DPs	AAA34578.1	P14020	Man	Man	DPM1_YEAST	Saccharomyces cerevisiae (strain ATCC 204508 / S288c) (Baker's yeast)
Inverting	GT2-DPs	AAC49401.1	P54856	Man	Man	DPM1_USTMA	Ustilago maydis (strain 521 / FGSC 9021) (Corn smut fungus)
Inverting	GT2-DPs	AAC98795.1	O14466	Man	Man	DPM1_SCHPO	Schizosaccharomyces pombe (strain 972 / ATCC 24843) (Fission yeast)
Inverting	GT2-DPs	AAC98796.1	O17511	Man	Man	O17511_CAEBR	Caenorhabditis briggsae
Inverting	GT2-DPs	AAD30975.1	Q9WU83	Man	Man	DPM1_CRIGR	Cricetulus griseus (Chinese hamster) (Cricetulus barabensis griseus)
Inverting	GT2-DPs	AAG32629.1	Q9HGE2	Man	Man	Q9HGE2_HYPJE	Hypocrea jecorina (Trichoderma reesei)
Inverting	GT2-DPs	AAH07073.1	O60762	Man	Man	DPM1_HUMAN	Homo sapiens (Human)
Inverting	GT2-DPs	BAA25759.1	O70152	Man	Man	DPM1_MOUSE	Mus musculus (Mouse)
Inverting	GT2-DPs	BAA29119.1	O57812	Man	Man	O57812_PYRHO	Pyrococcus horikoshii (strain ATCC 700860 / DSM 12428 / JCM 9974 / NBRC 100139 / OT-3)
Inverting	GT2-DPs	CAA10541.1	O96795	Man	Man	O96795_LEIME	Leishmania mexicana
Inverting	GT2-DPs	CAA17265.1	A0A0H3M5A8	Man	Man	PPMNT_MYCBP	Mycobacterium bovis (strain BCG / Pasteur 1173P2)
Inverting	GT2-DPs	CAA90875.1	Q26732	Man	Man	Q26732_TRYBB	Trypanosoma brucei brucei
Inverting	GT2-DPs	CAB02014.1	P9WMX5	Man	Man	GLYTR_MYCTU	Mycobacterium tuberculosis (strain CDC 1551 / Oshkosh)
Inverting	GT2-DPs	CAM91696.1	D4GUA0	Man	Man	AGLD_HALVD	Haloferax volcanii (strain ATCC 29605 / DSM 3757 / JCM 8879 / NBRC 14742 / NCIMB 2012 / VKM B-1768 / DS2) (Halobacterium volcanii)
Inverting	GT2-DPs	CAR66203.1	D4GYG3	Man	Man	AGLJ_HALVD	Haloferax volcanii (strain ATCC 29605 / DSM 3757 / JCM 8879 / NBRC 14742 / NCIMB 2012 / VKM B-1768 / DS2) (Halobacterium volcanii)
Inverting	GT2-DPs	AAC75314.1	P77757	Ara	Others	ARNC_ECOLI	Escherichia coli (strain K12)
Inverting	GT2-LpsRelated	AAC44433.1	Q54435	Glc	Glc	KDTX_SERMA	Serratia marcescens
Inverting	GT2-LpsRelated	AAC44647.1	P95373	Glc	Glc	P95373_NEIME	Neisseria meningitidis
Inverting	GT2-LpsRelated	AAD37772.1	Q9XC90	Glc	Glc	WAAE_KLEPN	Klebsiella pneumoniae
Inverting	GT2-LpsRelated	AAF72876.1	Q9L875	Glc	Glc	Q9L875_HAEDC	Haemophilus ducreyi
Inverting	GT2-LpsRelated	AAL78071.1	Q8RSX5	Glc	Glc	Q8RSX5_PROMI	Proteus mirabilis
Inverting	GT2-LpsRelated	AAL78075.1	Q8RSX1	Glc	Glc	Q8RSX1_KLEAE	Klebsiella aerogenes (Enterobacter aerogenes)
Inverting	GT2-LpsRelated	AAL78078.1	Q8RSW8	Glc	Glc	Q8RSW8_YEREN	Yersinia enterocolitica
Inverting	GT2-LpsRelated	AAP96048.1	G1UB77	Glc	Glc	G1UB77_HAEDU	Haemophilus ducreyi (strain 35000HP / ATCC 700724)
Inverting	GT2-LpsRelated	AAZ29046.1_2	Q1PSV5	Glc	Glc	Q1PSV5_MORCA	Moraxella catarrhalis (Branhamella catarrhalis)
Inverting	GT2-LpsRelated	AAZ29046.1	Q1PSV5	Glc	Glc	Q1PSV5_MORCA	Moraxella catarrhalis (Branhamella catarrhalis)
Inverting	GT2-LpsRelated	ADK56067.1	E0YP68	Glc	Glc	E0YP68_PROMI	Proteus mirabilis
Inverting	GT2-LpsRelated	ADV57361.1	E9K9Y6	Glc	Glc	E9K9Y6_LACPN	Lactobacillus plantarum
Inverting	GT2-LpsRelated	CAB14063.1	O31986	Glc	Glc	SUNS_BACSU	Bacillus subtilis (strain 168)
Inverting	GT2-Rham-GlfT	AAF04375.1	Q9RN50	Rham	Others	Q9RN50_MYCSM	Mycolicibacterium smegmatis (Mycobacterium smegmatis)
Inverting	GT2-Rham-GlfT	AAF04376.1	Q9RN49	Rham	Others	Q9RN49_MYCSM	Mycolicibacterium smegmatis (Mycobacterium smegmatis)
Inverting	GT2-Rham-GlfT	AAG04519.1	Q9I4K5	Rham	Others	Q9I4K5_PSEAE	Pseudomonas aeruginosa (strain ATCC 15692 / DSM 22644 / CIP 104116 / JCM 14847 / LMG 12228 / 1C / PRS 101 / PAO1)
Inverting	GT2-Rham-GlfT	AAK47706.1	P9WMY2	Rham	Others	WBBL_MYCTO	Mycobacterium tuberculosis (strain CDC 1551 / Oshkosh)
Inverting	GT2-Rham-GlfT	ABK69689.1	A0R5Z2	GalF	Others	GLFT1_MYCS2	Mycolicibacterium smegmatis (strain ATCC 700084 / mc(2)155) (Mycobacterium smegmatis)
Inverting	GT2-Rham-GlfT	APK80337.1	UPI000540B67C	Rham	Others	-	Escherichia coli
Inverting	GT2-Rham-GlfT	CAA17872.1	O53585	GalF	Others	GLFT2_MYCTU	Mycobacterium tuberculosis (strain ATCC 25618 / H37Rv)
Inverting	GT2-Rham-GlfT	CAA50772.1	P37782	Rham	Others	RFBF_SHIFL	Shigella flexneri
Inverting	GT2-Rham-GlfT	CAB02461.1	P9WMX3	GalF	Others	GLFT1_MYCTU	Mycobacterium tuberculosis (strain ATCC 25618 / H37Rv)
Inverting	GT2-Rham-GlfT	CAE55576.1	A0A0T9F9H6	Rham	Others	A0A0T9F9H6_MYCTX	Mycobacterium tuberculosis
Inverting	GT31	AAM61770	Q8NFL0	GlcNAc	GlcNAc	B3GN7_HUMAN	Homo sapiens (Human)
Inverting	GT31	BAB88882	Q6ZMB0	GlcNAc	GlcNAc	B3GN6_HUMAN	Homo sapiens (Human)
Inverting	GT31	AAH21223	Q8IZ52	GlcA	Others	CHSS2_HUMAN	Homo sapiens (Human)
Inverting	GT31	AAQ88893_2	Q86X52	GlcA	Others	CHSS1_HUMAN	Homo sapiens (Human)
Inverting	GT31	AAQ88893	Q86X52	GlcA	Others	CHSS1_HUMAN	Homo sapiens (Human)
Inverting	GT31	BAC98832_2	Q70JA7	GlcA	Others	CHSS3_HUMAN	Homo sapiens (Human)
Inverting	GT31	BAC98832	Q70JA7	GlcA	Others	CHSS3_HUMAN	Homo sapiens (Human)
Inverting	GT31	NP_061888	Q9P2E5	GlcA	Others	CHPF2_HUMAN	Homo sapiens (Human)
Inverting	GT31-Euk	AAF31275.1	Q9MAP8	Gal	Gal	B3GT6_ARATH	Arabidopsis thaliana (Mouse-ear cress)
Inverting	GT31-Euk	AAF59065.1	A1Z7G9	Gal	Gal	A1Z7G9_DROME	Drosophila melanogaster (Fruit fly)
Inverting	GT31-Euk	AAF60408.1	Q9N491	Gal	Gal	SQV2_CAEEL	Caenorhabditis elegans
Inverting	GT31-Euk	AAH29564.1	Q8NCR0	GalNAc	GalNAc	B3GL2_HUMAN	Homo sapiens (Human)
Inverting	GT31-Euk	BAC39153.1	Q8BG28	GalNAc	GalNAc	B3GL2_MOUSE	Mus musculus (Mouse)
Inverting	GT31-Fringe	AAA64525.1	Q24342	GlcNAc	GlcNAc	FNG_DROME	Drosophila melanogaster (Fruit fly)
Inverting	GT31-Fringe	AAB71668.1	O09010	GlcNAc	GlcNAc	LFNG_MOUSE	Mus musculus (Mouse)
Inverting	GT31-Fringe	AAB71669.1	O09008	GlcNAc	GlcNAc	MFNG_MOUSE	Mus musculus (Mouse)
Inverting	GT31-Fringe	AAB71670.1	O09009	GlcNAc	GlcNAc	RFNG_MOUSE	Mus musculus (Mouse)
Inverting	GT31-Fringe	AAC51358.1	O00587	GlcNAc	GlcNAc	MFNG_HUMAN	Homo sapiens (Human)
Inverting	GT31-Fringe	XP_001521629.1	F7BVD1	GlcNAc	GlcNAc	F7BVD1_ORNAN	Ornithorhynchus anatinus (Duckbill platypus)
Inverting	GT31-Fringe	XP_002422797.1	E0V9K3	GlcNAc	GlcNAc	E0V9K3_PEDHC	Pediculus humanus subsp. corporis (Body louse)
Inverting	GT31-Galt-Gnt	AAC53523.1	O54904	Gal	Gal	B3GT1_MOUSE	Mus musculus (Mouse)
Inverting	GT31-Galt-Gnt	AAC53525.1	Q920V1	Gal	Gal	B3GL1_MOUSE	Mus musculus (Mouse)
Inverting	GT31-Galt-Gnt	AAC69622.1	Q9Z0F0	Gal	Gal	B3GT4_MOUSE	Mus musculus (Mouse)
Inverting	GT31-Galt-Gnt	AAD23451.1	Q9Y5Z6	Gal	Gal	B3GT1_HUMAN	Homo sapiens (Human)
Inverting	GT31-Galt-Gnt	AAF86241.1	Q9JI67	Gal	Gal	B3GT5_MOUSE	Mus musculus (Mouse)
Inverting	GT31-Galt-Gnt	AAH22507.1	O43825	Gal	Gal	B3GT2_HUMAN	Homo sapiens (Human)
Inverting	GT31-Galt-Gnt	ABR58857.1	A7XDQ9	Gal	Gal	B3GTK_ARATH	Arabidopsis thaliana (Mouse-ear cress)
Inverting	GT31-Galt-Gnt	ABR58858.1	Q8L7F9	Gal	Gal	B3GTF_ARATH	Arabidopsis thaliana (Mouse-ear cress)
Inverting	GT31-Galt-Gnt	BAA32045.1	O88178	Gal	Gal	B3GT4_RAT	Rattus norvegicus (Rat)
Inverting	GT31-Galt-Gnt	BAA77664.1	Q9Y2C3	Gal	Gal	B3GT5_HUMAN	Homo sapiens (Human)
Inverting	GT31-Galt-Gnt	BAB40940.1	Q9BYG0	Gal	Gal	B3GN5_HUMAN	Homo sapiens (Human)
Inverting	GT31-Galt-Gnt	BAC28688.1	O54905	Gal	Gal	B3GT2_MOUSE	Mus musculus (Mouse)
Inverting	GT31-Galt-Gnt	CAA75345.1	O96024	Gal	Gal	B3GT4_HUMAN	Homo sapiens (Human)
Inverting	GT31-Galt-Gnt	NP_542172	Q96L58	Gal	Gal	B3GT6_HUMAN	Homo sapiens (Human)
Inverting	GT31-Galt-Gnt	AAF66442.1	O75752	GalNAc	GalNAc	B3GL1_HUMAN	Homo sapiens (Human)
Inverting	GT31-Galt-Gnt	AAD09763.1	UPI000002972D	GlcNAc	GlcNAc	-	Mus musculus (Mouse)
Inverting	GT31-Galt-Gnt	AAF45918.1	Q24157	GlcNAc	GlcNAc	BRN_DROME	Drosophila melanogaster (Fruit fly)
Inverting	GT31-Galt-Gnt	AAH09075.1	Q9Z222	GlcNAc	GlcNAc	B3GN2_MOUSE	Mus musculus (Mouse)
Inverting	GT31-Galt-Gnt	AAH30579.1	Q9NY97	GlcNAc	GlcNAc	B3GN2_HUMAN	Homo sapiens (Human)
Inverting	GT31-Galt-Gnt	AAH31187.1	Q8K0J2	GlcNAc	GlcNAc	B3GN7_MOUSE	Mus musculus (Mouse)
Inverting	GT31-Galt-Gnt	AAK00849.1	Q9Y2A9	GlcNAc	GlcNAc	B3GN3_HUMAN	Homo sapiens (Human)
Inverting	GT31-Galt-Gnt	AAK31579.1	Q8BGY6	GlcNAc	GlcNAc	B3GN5_MOUSE	Mus musculus (Mouse)
Inverting	GT31-Galt-Gnt	AAP34405.1	Q7Z7M8	GlcNAc	GlcNAc	B3GN8_HUMAN	Homo sapiens (Human)
Inverting	GT31-Galt-Gnt	BAB21532.1	Q9C0J1	GlcNAc	GlcNAc	B3GN4_HUMAN	Homo sapiens (Human)
Inverting	GT31-Glt	AAF81981.1	Q9NS00	Gal	Gal	C1GLT_HUMAN	Homo sapiens (Human)
Inverting	GT31-Glt	AAF81982.1	Q9JJ06	Gal	Gal	C1GLT_MOUSE	Mus musculus (Mouse)
Inverting	GT31-Glt	AAF81983.1	Q9JJ05	Gal	Gal	C1GLT_RAT	Rattus norvegicus (Rat)
Inverting	GT31-Glt	AAH11930.1	Q96EU7	Gal	Gal	C1GLC_HUMAN	Homo sapiens (Human)
Inverting	GT31-Glt	CAA84707.2	Q18515	Gal	Gal	C1GLT_CAEEL	Caenorhabditis elegans
Inverting	GT31-Glt	AAO37647.1	Q6Y288	Glc	Glc	B3GLT_HUMAN	Homo sapiens (Human)
Inverting	GT31-Glt	BAF02833.1_2	Q8BHT6	Glc	Glc	B3GLT_MOUSE	Mus musculus (Mouse)
Inverting	GT31-Glt	BAF02833.1	Q8BHT6	Glc	Glc	B3GLT_MOUSE	Mus musculus (Mouse)
Inverting	GT31-Glt	EAA60099.1	Q5ASQ3	GalF	Others	Q5ASQ3_EMENI	Emericella nidulans (strain FGSC A4 / ATCC 38163 / CBS 112.46 / NRRL 194 / M139) (Aspergillus nidulans)
Inverting	GT40	AAA03083.1	Q05889	GalF	Others	LPG1_LEIDO	Leishmania donovani
Inverting	GT40	AAO92017.1	Q6XFB6	GalF	Others	Q6XFB6_LEIMA	Leishmania major
Inverting	GT40	CAJ04354.1	Q9NC61	GalF	Others	Q9NC61_LEIMA	Leishmania major
Inverting	GT40	EGY01064.1	G1Y073	GalF	Others	G1Y073_9PROT	Nitrospirillum amazonense Y2
Inverting	GT40	EPY23259.1	S9UAE9	GalF	Others	S9UAE9_9TRYP	Strigomonas culicis
Inverting	GT40	WP_052023259.1	A0A021VPC1	GalF	Others	A0A021VPC1_9CELL	Actinotalea ferrariae CF5-4
Inverting	GT40	XP_817720.1	Q4DTL8	GalF	Others	Q4DTL8_TRYCC	Trypanosoma cruzi (strain CL Brener)
Inverting	GT43	AAD18150.1	Q9ZQC6	Xyl	Others	IRX9_ARATH	Arabidopsis thaliana (Mouse-ear cress)
Inverting	GT43	AAD22007.1	Q9WU47	GlcA	Others	B3GA3_CRIGR	Cricetulus griseus (Chinese hamster) (Cricetulus barabensis griseus)
Inverting	GT43	AAD45998.1	Q9SXC4	Xyl	Others	IRX9H_ARATH	Arabidopsis thaliana (Mouse-ear cress)
Inverting	GT43	AAF52795.2	Q9VLA1	GlcA	Others	B3G2S_DROME	Drosophila melanogaster (Fruit fly)
Inverting	GT43	AAH71961.1	O94766	GlcA	Others	B3GA3_HUMAN	Homo sapiens (Human)
Inverting	GT43	AAL49771.1	Q9FH90	Xyl	Others	IX14H_ARATH	Arabidopsis thaliana (Mouse-ear cress)
Inverting	GT43	AAL57718.1	Q9NPZ5	GlcA	Others	B3GA2_HUMAN	Homo sapiens (Human)
Inverting	GT43	BAA20551.1	O35789	GlcA	Others	B3GA1_RAT	Rattus norvegicus (Rat)
Inverting	GT43	BAA75219.1	Q9Z137	GlcA	Others	B3GA2_RAT	Rattus norvegicus (Rat)
Inverting	GT43	CAB16800.1	Q8L707	Xyl	Others	IRX14_ARATH	Arabidopsis thaliana (Mouse-ear cress)
Inverting	GT43	CAD89797.1	Q7ZZM8	GlcA	Others	Q7ZZM8_XENLA	Xenopus laevis (African clawed frog)
Inverting	GT43	XP_005271563	Q9P2W7	GlcA	Others	B3GA1_HUMAN	Homo sapiens (Human)
Inverting	GT49	AAC39538.1	O43505	GlcNAc	GlcNAc	B4GA1_HUMAN	Homo sapiens (Human)
Inverting	GT49	CAB04495	O45584	GlcNAc	GlcNAc	O45584_CAEEL	Caenorhabditis elegans
Inverting	GT49	XP_001868312.1	B0XF90	GlcNAc	GlcNAc	B0XF90_CULQU	Culex quinquefasciatus (Southern house mosquito) (Culex pungens)
Inverting	GT49	CAA91997	Q21389	GlcA	Others	LGE1_CAEEL	Caenorhabditis elegans
Inverting	GT49	XP_007497696.1	UPI0007B410CF	GlcA	Others	-	Monodelphis domestica (Gray short-tailed opossum)
Inverting	GT49	XP_011399457.1	A0A087SLB5	GlcA	Others	A0A087SLB5_AUXPR	Auxenochlorella protothecoides (Green microalga) (Chlorella protothecoides)
Inverting	GT54	AAF49706	Q9VUH5	GlcNAc	GlcNAc	Q9VUH5_DROME	Drosophila melanogaster (Fruit fly)
Inverting	GT54	AAL48961	Q8SYS6	GlcNAc	GlcNAc	Q8SYS6_DROME	Drosophila melanogaster (Fruit fly)
Inverting	GT54	BAA31162.1	O77836	GlcNAc	GlcNAc	MGT4A_BOVIN	Bos taurus (Bovine)
Inverting	GT54	BAA86388	Q9UM21	GlcNAc	GlcNAc	MGT4A_HUMAN	Homo sapiens (Human)
Inverting	GT54	BAB16845.1	Q9DGD1	GlcNAc	GlcNAc	MGT4C_CHICK	Gallus gallus (Chicken)
Inverting	GT54	KDR10509.1	A0A067QZG9	GlcNAc	GlcNAc	A0A067QZG9_ZOONE	Zootermopsis nevadensis (Dampwood termite)
Inverting	GT54	KEY73592.1	A0A084B7R3	GlcNAc	GlcNAc	A0A084B7R3_STACB	Stachybotrys chartarum (strain CBS 109288 / IBT 7711) (Toxic black mold) (Stilbospora chartarum)
Inverting	GT54	KHN88735.1	A0A0B2W674	GlcNAc	GlcNAc	A0A0B2W674_TOXCA	Toxocara canis (Canine roundworm)
Inverting	GT54	NP_001338211	UPI0000E232D6	GlcNAc	GlcNAc	-	Pan troglodytes (Chimpanzee); Homo sapiens (Human); Pan paniscus (Pygmy chimpanzee) (Bonobo)
Inverting	GT54	NP_463459	Q9UQ53	GlcNAc	GlcNAc	MGT4B_HUMAN	Homo sapiens (Human)
Inverting	GT54	XP_002501733.1	C1E3T3	GlcNAc	GlcNAc	C1E3T3_MICCC	Micromonas commoda (strain RCC299 / NOUM17 / CCMP2709) (Picoplanktonic green alga)
Inverting	GT54	XP_004347921.1	A0A0D2X2W9	GlcNAc	GlcNAc	A0A0D2X2W9_CAPO3	Capsaspora owczarzaki (strain ATCC 30864)
Inverting	GT54	XP_008571505.1	UPI0004D0624C	GlcNAc	GlcNAc	-	Galeopterus variegatus (Malayan flying lemur) (Cynocephalus variegatus)
Inverting	GT54	XP_011744983.1	UPI0005F4562E	GlcNAc	GlcNAc	-	Macaca nemestrina (Pig-tailed macaque); Macaca mulatta (Rhesus macaque)
Inverting	GT54	XP_013053271.1	UPI0006714F85	GlcNAc	GlcNAc	-	Anser cygnoides domesticus
Inverting	GT67	CAJ03688.1	Q4QCL8	Gal	Gal	Q4QCL8_LEIMA	Leishmania major
Inverting	GT67	CAJ07085.1	Q4QIG9	Gal	Gal	Q4QIG9_LEIMA	Leishmania major
Inverting	GT67	CAJ08951.1	Q7YXV1	Gal	Gal	Q7YXV1_LEIMA	Leishmania major
Inverting	GT67	CBZ11889.1	Q7YXV2	Gal	Gal	Q7YXV2_LEIMA	Leishmania major
Inverting	GT67	AAZ10597.1	Q57VH7	GlcNAc	GlcNAc	Q57VH7_TRYB2	Trypanosoma brucei brucei (strain 927/4 GUTat10.1)
Inverting	GT67	AAZ12095.1	Q57U24	GlcNAc	GlcNAc	Q57U24_TRYB2	Trypanosoma brucei brucei (strain 927/4 GUTat10.1)
Inverting	GT7	AAA37297.1	P15535	Gal	Gal	B4GT1_MOUSE	Mus musculus (Mouse)
Inverting	GT7	AAB05217.1	Q92073	Gal	Gal	Q92073_CHICK	Gallus gallus (Chicken)
Inverting	GT7	AAB05218.1	Q92074	Gal	Gal	Q92074_CHICK	Gallus gallus (Chicken)
Inverting	GT7	AAC24515.1	O88419	Gal	Gal	B4GT6_RAT	Rattus norvegicus (Rat)
Inverting	GT7	AAD41694.1	Q9WVK5	Gal	Gal	B4GT6_MOUSE	Mus musculus (Mouse)
Inverting	GT7	AAF22221.1	Q91YY2	Gal	Gal	B4GT3_MOUSE	Mus musculus (Mouse)
Inverting	GT7	AAF22222.1	Q9JJ04	Gal	Gal	B4GT4_MOUSE	Mus musculus (Mouse)
Inverting	GT7	AAF22223.1	Q9QY11	Gal	Gal	Q9QY11_MOUSE	Mus musculus (Mouse)
Inverting	GT7	AAF56377.1	Q9VBZ9	Gal	Gal	Q9VBZ9_DROME	Drosophila melanogaster (Fruit fly)
Inverting	GT7	AAH07317.1	Q9UBV7	Gal	Gal	B4GT7_HUMAN	Homo sapiens (Human)
Inverting	GT7	AAH80228.1	Q68EK0	Gal	Gal	Q68EK0_DANRE	Danio rerio (Zebrafish) (Brachydanio rerio)
Inverting	GT7	BAA25006.1	O43286	Gal	Gal	B4GT5_HUMAN	Homo sapiens (Human)
Inverting	GT7	BAA75819.1	O60909	Gal	Gal	B4GT2_HUMAN	Homo sapiens (Human)
Inverting	GT7	BAA75820.1	O60512	Gal	Gal	B4GT3_HUMAN	Homo sapiens (Human)
Inverting	GT7	BAA75821.1	O60513	Gal	Gal	B4GT4_HUMAN	Homo sapiens (Human)
Inverting	GT7	BAA76273.2	Q9UBX8	Gal	Gal	B4GT6_HUMAN	Homo sapiens (Human)
Inverting	GT7	BAB00635.1	Q9NDP2	Gal	Gal	Q9NDP2_CIOIN	Ciona intestinalis (Transparent sea squirt) (Ascidia intestinalis)
Inverting	GT7	CAA39073.1	P15291	Gal	Gal	B4GT1_HUMAN	Homo sapiens (Human)
Inverting	GT7	AAD34746.1	Q7KN92	GalNAc	GalNAc	Q7KN92_DROME	Drosophila melanogaster (Fruit fly)
Inverting	GT7	AAF56843.1	Q9VAQ8	GalNAc	GalNAc	Q9VAQ8_DROME	Drosophila melanogaster (Fruit fly)
Inverting	GT7	AAG23384.1	Q9GUM2	GalNAc	GalNAc	BRE4_CAEEL	Caenorhabditis elegans
Inverting	GT7	AAH30268.1	Q8N6G5	GalNAc	GalNAc	CGAT2_HUMAN	Homo sapiens (Human)
Inverting	GT7	AAT11926.1	Q6J4T9	GalNAc	GalNAc	Q6J4T9_TRINI	Trichoplusia ni (Cabbage looper)
Inverting	GT7	BAB85992	Q8TDX6	GalNAc	GalNAc	CGAT1_HUMAN	Homo sapiens (Human)
Inverting	GT7	AAP66234.1_2	Q09323	GlcNAc	GlcNAc	BAGT_LYMST	Lymnaea stagnalis (Great pond snail) (Helix stagnalis)
Inverting	GT7	AAP66234.1	Q09323	GlcNAc	GlcNAc	BAGT_LYMST	Lymnaea stagnalis (Great pond snail) (Helix stagnalis)
Inverting	GT75	AAF07834	O22666	Glc	Glc	RGP3_ARATH	Arabidopsis thaliana (Mouse-ear cress)
Inverting	GT75	AAM52234	Q9LFW1	Glc	Glc	RGP2_ARATH	Arabidopsis thaliana (Mouse-ear cress)
Inverting	GT75	AAM66046	Q9FFD2	Glc	Glc	RGP5_ARATH	Arabidopsis thaliana (Mouse-ear cress)
Inverting	GT75	AAN08217.1	Q8H8T0	Glc	Glc	RGP1_ORYSJ	Oryza sativa subsp. japonica (Rice)
Inverting	GT75	AAP68280	Q9SRT9	Glc	Glc	RGP1_ARATH	Arabidopsis thaliana (Mouse-ear cress)
Inverting	GT75	BAA96988	Q9LUE6	Glc	Glc	RGP4_ARATH	Arabidopsis thaliana (Mouse-ear cress)
Inverting	GT75	BAC83877.1	Q6Z4G3	Glc	Glc	RGP3_ORYSJ	Oryza sativa subsp. japonica (Rice)
Inverting	GT75	CAA77235.1	Q9ZR35	Glc	Glc	Q9ZR35_ORYSA	Oryza sativa (Rice)
Inverting	GT75	CAA77237.1	Q9ZR33	Glc	Glc	Q9ZR33_WHEAT	Triticum aestivum (Wheat)
Inverting	GT75	CAC84517.1	Q8RU27	Glc	Glc	RGP2_SOLTU	Solanum tuberosum (Potato)
Inverting	GT75	EGT36658.1	G0NS92	Glc	Glc	G0NS92_CAEBE	Caenorhabditis brenneri (Nematode worm)
Inverting	GT75	EWM20265.1	W7SZI8	Glc	Glc	W7SZI8_9STRA	Nannochloropsis gaditana
Inverting	GT75	KDD75206.1	A0A059LM11	Glc	Glc	A0A059LM11_9CHLO	Helicosporidium sp. ATCC 50920
Inverting	GT75	KFH71421.1	-	Glc	Glc	-	Mortierella verticillata NRRL 6337
Inverting	GT75	KFH71702.1	-	Glc	Glc	-	Mortierella verticillata NRRL 6337
Inverting	GT75	KKT35345.1	A0A0G1GLC9	Glc	Glc	A0A0G1GLC9_9BACT	Candidatus Gottesmanbacteria bacterium GW2011_GWB1_44_11c
Inverting	GT75	WP_006668727.1	B5VY93	Glc	Glc	B5VY93_LIMMA	Arthrospira maxima CS-328
Inverting	GT75	WP_011572705.1	Q18EK9	Glc	Glc	Q18EK9_HALWD	Haloquadratum walsbyi (strain DSM 16790 / HBSQ001)
Inverting	GT75	WP_049921551.1	UPI0006781496	Glc	Glc	-	Halopiger djelfimassiliensis
Inverting	GT75	XP_002179412.1	B7FWN8	Glc	Glc	B7FWN8_PHATC	Phaeodactylum tricornutum (strain CCAP 1055/1)
Inverting	GT75	XP_005642655.1	I0YI92	Glc	Glc	I0YI92_COCSC	Coccomyxa subellipsoidea (strain C-169) (Green microalga)
Inverting	GT75	XP_005838730.1	L1JU79	Glc	Glc	L1JU79_GUITC	Guillardia theta (strain CCMP2712) (Cryptophyte)
Inverting	GT75	XP_006411445.1	V4MJT8	Glc	Glc	V4MJT8_EUTSA	Eutrema salsugineum (Saltwater cress) (Sisymbrium salsugineum)
Inverting	GT75	XP_009061393.1	V4A3T1	Glc	Glc	V4A3T1_LOTGI	Lottia gigantea (Giant owl limpet)
Inverting	GT82	AAL05993.1	Q934C5	GalNAc	GalNAc	Q934C5_CAMJU	Campylobacter jejuni
Inverting	GT82	AAZ80465.1	Q934C5	GalNAc	GalNAc	Q934C5_CAMJU	Campylobacter jejuni
Inverting	GT82	WP_005958834.1	UPI00025E5C5E	GalNAc	GalNAc	-	Fusobacterium necrophorum
Inverting	GT82	WP_047115763.1	UPI00063DC62B	GalNAc	GalNAc	-	Brachyspira hyodysenteriae (Treponema hyodysenteriae)
Inverting	GT82	WP_050550067.1	UPI00026A02A7	GalNAc	GalNAc	-	Helicobacter pylori Hp H-28; Helicobacter pylori (Campylobacter pylori)
Inverting	GT82	XP_001316819.1	A2ES01	GalNAc	GalNAc	A2ES01_TRIVA	Trichomonas vaginalis
Inverting	GT84	AAC74133.1	P62517	Glc	Glc	OPGH_ECOLI	Escherichia coli (strain K12)
Inverting	GT84	AAK73356.1	Q93N05	Glc	Glc	Q93N05_RHIRD	Rhizobium radiobacter (Agrobacterium tumefaciens) (Agrobacterium radiobacter)
Inverting	GT84	ACD71661.1	A0A0F6ANM6	Glc	Glc	A0A0F6ANM6_BRUA1	Brucella abortus (strain S19)
Inverting	GT84	KJK90816.1	A0A0D9PDW7	Glc	Glc	A0A0D9PDW7_METAN	Metarhizium anisopliae BRIP 53293
Inverting	GT84	WP_010041290.1	UPI00016C4705	Glc	Glc	-	Gemmata obscuriglobus; Gemmata obscuriglobus UQM 2246
Inverting	GT84	WP_037016169.1	UPI00055C269C	Glc	Glc	-	Rhizobiales bacterium YIM 77505
Inverting	GT84	XP_003026669.1	D8QJS7	Glc	Glc	D8QJS7_SCHCM	Schizophyllum commune (strain H4-8 / FGSC 9210) (Split gill fungus)
Retaining	GT15	AAA16119	P33550	Man	Man	KTR2_YEAST	Saccharomyces cerevisiae (strain ATCC 204508 / S288c) (Baker's yeast)
Retaining	GT15	AAA34784	P27809	Man	Man	KRE2_YEAST	Saccharomyces cerevisiae (strain ATCC 204508 / S288c) (Baker's yeast)
Retaining	GT15	AAB68312	P54070	Man	Man	KTR6_YEAST	Saccharomyces cerevisiae (strain ATCC 204508 / S288c) (Baker's yeast)
Retaining	GT15	AAT92917	P38131	Man	Man	KTR4_YEAST	Saccharomyces cerevisiae (strain ATCC 204508 / S288c) (Baker's yeast)
Retaining	GT15	AAV19790	P38130	Man	Man	KTR3_YEAST	Saccharomyces cerevisiae (strain ATCC 204508 / S288c) (Baker's yeast)
Retaining	GT15	ABD85704.1	Q21D32	Man	Man	Q21D32_RHOPB	Rhodopseudomonas palustris (strain BisB18)
Retaining	GT15	CAA41111	P26725	Man	Man	YUR1_YEAST	Saccharomyces cerevisiae (strain ATCC 204508 / S288c) (Baker's yeast)
Retaining	GT15	CAA44713	P27810	Man	Man	KTR1_YEAST	Saccharomyces cerevisiae (strain ATCC 204508 / S288c) (Baker's yeast)
Retaining	GT15	CAA61538.1	P46592	Man	Man	MNT2_CANAL	Candida albicans (strain SC5314 / ATCC MYA-2876) (Yeast)
Retaining	GT15	CAA67930.1	Q00310	Man	Man	MNT1_CANAL	Candida albicans (strain SC5314 / ATCC MYA-2876) (Yeast)
Retaining	GT15	CAA86709	P40504	Man	Man	KTR7_YEAST	Saccharomyces cerevisiae (strain ATCC 204508 / S288c) (Baker's yeast)
Retaining	GT15	CAA95891	P53966	Man	Man	KTR5_YEAST	Saccharomyces cerevisiae (strain ATCC 204508 / S288c) (Baker's yeast)
Retaining	GT15	ELU17833.1	R7VG61	Man	Man	R7VG61_CAPTE	Capitella teleta (Polychaete worm)
Retaining	GT15	XP_005840279.1	L1JYB0	Man	Man	L1JYB0_GUITC	Guillardia theta (strain CCMP2712) (Cryptophyte)
Retaining	GT15	XP_005846667.1	E1ZI30	Man	Man	E1ZI30_CHLVA	Chlorella variabilis (Green alga)
Retaining	GT15	XP_008044154.1	UPI00046222DF	Man	Man	-	Trametes versicolor (strain FP-101664) (White-rot fungus) (Coriolus versicolor)
Retaining	GT24	AAA85850	Q09332	Glc	Glc	UGGG_DROME	Drosophila melanogaster (Fruit fly)
Retaining	GT24	AAF26036	Q9FVU8	Glc	Glc	Q9FVU8_ARATH	Arabidopsis thaliana (Mouse-ear cress)
Retaining	GT24	AAF66233	Q9NYU1	Glc	Glc	UGGG2_HUMAN	Homo sapiens (Human)
Retaining	GT24	AAF67072.1	Q9JLA3	Glc	Glc	UGGG1_RAT	Rattus norvegicus (Rat)
Retaining	GT24	AAH41098	Q9NYU2	Glc	Glc	UGGG1_HUMAN	Homo sapiens (Human)
Retaining	GT24	AAH62936.1	Q6P5E4	Glc	Glc	UGGG1_MOUSE	Mus musculus (Mouse)
Retaining	GT24	AAX80632.1	Q582S2	Glc	Glc	Q582S2_TRYB2	Trypanosoma brucei brucei (strain 927/4 GUTat10.1)
Retaining	GT24	BAE65008.1	Q2U0A7	Glc	Glc	Q2U0A7_ASPOR	Aspergillus oryzae (strain ATCC 42149 / RIB 40) (Yellow koji mold)
Retaining	GT24	CAA89981	P22023	Glc	Glc	KRE5_YEAST	Saccharomyces cerevisiae (strain ATCC 204508 / S288c) (Baker's yeast)
Retaining	GT24	CAB04207	G5EF14	Glc	Glc	G5EF14_CAEEL	Caenorhabditis elegans
Retaining	GT24	CAC18923.1	UPI000004DF00	Glc	Glc	-	Candida albicans (Yeast)
Retaining	GT24	CAC37384.1	Q09140	Glc	Glc	UGGG_SCHPO	Schizosaccharomyces pombe (strain 972 / ATCC 24843) (Fission yeast)
Retaining	GT24	CCD71302	Q9GPA0	Glc	Glc	Q9GPA0_CAEEL	Caenorhabditis elegans
Retaining	GT24	EFA83957.1	D3B3Q9	Glc	Glc	D3B3Q9_POLPP	Polysphondylium pallidum (strain ATCC 26659 / Pp 5 / PN500) (Heterostelium pallidum)
Retaining	GT24	EMT29944.1	M8C6Q8	Glc	Glc	M8C6Q8_AEGTA	Aegilops tauschii (Tausch's goatgrass) (Aegilops squarrosa)
Retaining	GT24	KIY49922.1	A0A0D7AEX6	Glc	Glc	A0A0D7AEX6_9AGAR	Fistulina hepatica ATCC 64428
Retaining	GT24	XP_001415784.1	A4RQS2	Glc	Glc	A4RQS2_OSTLU	Ostreococcus lucimarinus (strain CCE9901)
Retaining	GT24	XP_001623889.1	A7SWY1	Glc	Glc	A7SWY1_NEMVE	Nematostella vectensis (Starlet sea anemone)
Retaining	GT24	XP_002120850.2	A0A1W2W4A0	Glc	Glc	A0A1W2W4A0_CIOIN	Ciona intestinalis (Transparent sea squirt) (Ascidia intestinalis)
Retaining	GT27	AAB09579.1	P70419	GalNAc	GalNAc	GALT3_MOUSE	Mus musculus (Mouse)
Retaining	GT27	AAB58301.1	O08832	GalNAc	GalNAc	GALT4_MOUSE	Mus musculus (Mouse)
Retaining	GT27	AAC13669.1	P34678	GalNAc	GalNAc	GALT3_CAEEL	Caenorhabditis elegans
Retaining	GT27	AAC13670.1	Q8I136	GalNAc	GalNAc	GALT4_CAEEL	Caenorhabditis elegans
Retaining	GT27	AAC13674.1	O61394	GalNAc	GalNAc	GALT6_CAEEL	Caenorhabditis elegans
Retaining	GT27	AAC13678.1	O45293	GalNAc	GalNAc	GALT8_CAEEL	Caenorhabditis elegans
Retaining	GT27	AAC13679.1	Q9U2C4	GalNAc	GalNAc	GALT9_CAEEL	Caenorhabditis elegans
Retaining	GT27	AAD38630.1	Q9Y117	GalNAc	GalNAc	GALT3_DROME	Drosophila melanogaster (Fruit fly)
Retaining	GT27	AAD45821.1	Q8NCW6	GalNAc	GalNAc	GLT11_HUMAN	Homo sapiens (Human)
Retaining	GT27	AAF44871.1	Q8MVS5	GalNAc	GalNAc	GLT35_DROME	Drosophila melanogaster (Fruit fly)
Retaining	GT27	AAF47689.1	Q6WV16	GalNAc	GalNAc	GALT6_DROME	Drosophila melanogaster (Fruit fly)
Retaining	GT27	AAF48851.1	Q8MV48	GalNAc	GalNAc	GALT7_DROME	Drosophila melanogaster (Fruit fly)
Retaining	GT27	AAF49587.1	Q9VUT6	GalNAc	GalNAc	GALT8_DROME	Drosophila melanogaster (Fruit fly)
Retaining	GT27	AAF52218.2	Q6WV17	GalNAc	GalNAc	GALT5_DROME	Drosophila melanogaster (Fruit fly)
Retaining	GT27	AAG13184.1	Q6WV20	GalNAc	GalNAc	GALT1_DROME	Drosophila melanogaster (Fruit fly)
Retaining	GT27	AAH22021	Q7Z4T8	GalNAc	GalNAc	GLTL5_HUMAN	Homo sapiens (Human)
Retaining	GT27	AAH41120	Q10471	GalNAc	GalNAc	GALT2_HUMAN	Homo sapiens (Human)
Retaining	GT27	AAH47551	Q49A17	GalNAc	GalNAc	GLTL6_HUMAN	Homo sapiens (Human)
Retaining	GT27	AAH60864	Q6P9A2	GalNAc	GalNAc	GLT18_HUMAN	Homo sapiens (Human)
Retaining	GT27	AAK37548.1	Q6PB93	GalNAc	GalNAc	GALT2_MOUSE	Mus musculus (Mouse)
Retaining	GT27	AAK37549.1	Q80VA0	GalNAc	GalNAc	GALT7_MOUSE	Mus musculus (Mouse)
Retaining	GT27	AAK54498.1	Q925R7	GalNAc	GalNAc	GLT10_RAT	Rattus norvegicus (Rat)
Retaining	GT27	AAK63127.1	Q8N3T1	GalNAc	GalNAc	GLT15_HUMAN	Homo sapiens (Human)
Retaining	GT27	AAM62306	Q6IS24	GalNAc	GalNAc	GLT17_HUMAN	Homo sapiens (Human)
Retaining	GT27	AAM81085.1	Q8MM26	GalNAc	GalNAc	Q8MM26_TOXGO	Toxoplasma gondii
Retaining	GT27	AAM95450.1	Q6YK77	GalNAc	GalNAc	Q6YK77_TOXGO	Toxoplasma gondii
Retaining	GT27	AAN10370.1	Q8IA42	GalNAc	GalNAc	GALT4_DROME	Drosophila melanogaster (Fruit fly)
Retaining	GT27	AAP34404.1	Q7Z7M9	GalNAc	GalNAc	GALT5_HUMAN	Homo sapiens (Human)
Retaining	GT27	AAQ22499.1	Q6WV19	GalNAc	GalNAc	GALT2_DROME	Drosophila melanogaster (Fruit fly)
Retaining	GT27	AAQ56593.1	Q6V2D0	GalNAc	GalNAc	Q6V2D0_ECHGR	Echinococcus granulosus (Hydatid tapeworm)
Retaining	GT27	AAQ95170.1	Q6TBR4	GalNAc	GalNAc	Q6TBR4_TOXGO	Toxoplasma gondii
Retaining	GT27	AAQ95171.1	Q6TBR3	GalNAc	GalNAc	Q6TBR3_TOXGO	Toxoplasma gondii
Retaining	GT27	AAQ95173.1	Q6YBY0	GalNAc	GalNAc	Q6YBY0_TOXGO	Toxoplasma gondii
Retaining	GT27	AAQ95174.2	Q6TBR0	GalNAc	GalNAc	Q6TBR0_CRYPV	Cryptosporidium parvum
Retaining	GT27	AAQ95175.1	Q5CS12	GalNAc	GalNAc	Q5CS12_CRYPI	Cryptosporidium parvum (strain Iowa II)
Retaining	GT27	AAQ95176.2	Q6TBQ8	GalNAc	GalNAc	Q6TBQ8_CRYPV	Cryptosporidium parvum
Retaining	GT27	AGS17229.1	S5S833	GalNAc	GalNAc	S5S833_BIOGL	Biomphalaria glabrata (Bloodfluke planorb) (Freshwater snail)
Retaining	GT27	BAB13699.2	Q9HCQ5	GalNAc	GalNAc	GALT9_HUMAN	Homo sapiens (Human)
Retaining	GT27	BAC07181.1	Q8IXK2	GalNAc	GalNAc	GLT12_HUMAN	Homo sapiens (Human)
Retaining	GT27	BAC33618.1	Q8C7U7	GalNAc	GalNAc	GALT6_MOUSE	Mus musculus (Mouse)
Retaining	GT27	BAC56889.1	Q96FL9	GalNAc	GalNAc	GLT14_HUMAN	Homo sapiens (Human)
Retaining	GT27	BAF98739	Q68VJ8	GalNAc	GalNAc	Q68VJ8_HUMAN	Homo sapiens (Human)
Retaining	GT27	CAA63371	Q14435	GalNAc	GalNAc	GALT3_HUMAN	Homo sapiens (Human)
Retaining	GT27	CAA69875	Q8N4A0	GalNAc	GalNAc	GALT4_HUMAN	Homo sapiens (Human)
Retaining	GT27	CAB60270	Q86SF2	GalNAc	GalNAc	GALT7_HUMAN	Homo sapiens (Human)
Retaining	GT27	CAD44532	Q86SR1	GalNAc	GalNAc	GLT10_HUMAN	Homo sapiens (Human)
Retaining	GT27	CAD44533	Q8IUC8	GalNAc	GalNAc	GLT13_HUMAN	Homo sapiens (Human)
Retaining	GT27	CCD70652.1	O61397	GalNAc	GalNAc	GALT7_CAEEL	Caenorhabditis elegans
Retaining	GT27	NP_009141	Q8NCL4	GalNAc	GalNAc	GALT6_HUMAN	Homo sapiens (Human)
Retaining	GT27	NP_059113.1	Q9NY28	GalNAc	GalNAc	GALT8_HUMAN	Homo sapiens (Human)
Retaining	GT27	NP_077349.1	Q10473	GalNAc	GalNAc	GALT1_RAT	Rattus norvegicus (Rat)
Retaining	GT32	AAF82758.1	Q9JI93	Gal	Gal	A4GAT_RAT	Rattus norvegicus (Rat)
Retaining	GT32	AAM90647.1	Q8KWQ9	Gal	Gal	Q8KWQ9_CAMJU	Campylobacter jejuni
Retaining	GT32	ADC84388.1	D3UBG7	Gal	Gal	D3UBG7_COLLI	Columba livia (Rock dove)
Retaining	GT32	BAA95915.1	Q9NPC4	Gal	Gal	A4GAT_HUMAN	Homo sapiens (Human)
Retaining	GT32	AAF51162.1	Q9VQK4	GalNAc	GalNAc	Q9VQK4_DROME	Drosophila melanogaster (Fruit fly)
Retaining	GT32	AAD48406.1	Q9UNA3	GlcNAc	GlcNAc	A4GCT_HUMAN	Homo sapiens (Human)
Retaining	GT32	AAL49987.1	Q8X124	Man	Man	Q8X124_CANAX	Candida albicans (Yeast)
Retaining	GT32	AAO78880.1	Q8A191	Man	Man	Q8A191_BACTN	Bacteroides thetaiotaomicron (strain ATCC 29148 / DSM 2079 / NCTC 10582 / E50 / VPI-5482)
Retaining	GT32	AAO78881.1	Q8A190	Man	Man	Q8A190_BACTN	Bacteroides thetaiotaomicron (strain ATCC 29148 / DSM 2079 / NCTC 10582 / E50 / VPI-5482)
Retaining	GT32	AAQ06408.1	Q71JQ0	Man	Man	Q71JQ0_PICAN	Pichia angusta (Yeast) (Hansenula polymorpha)
Retaining	GT32	AAT92768.1	P31755	Man	Man	OCH1_YEAST	Saccharomyces cerevisiae (strain ATCC 204508 / S288c) (Baker's yeast)
Retaining	GT32	AGF29563.1	V9MGK6	Man	Man	V9MGK6_FUSOX	Fusarium oxysporum f. sp. cubense
Retaining	GT32	CAD24818.1	Q9UTR6	Man	Man	OCH1_SCHPO	Schizosaccharomyces pombe (strain 972 / ATCC 24843) (Fission yeast)
Retaining	GT32	CAD91643.1	Q70MH4	Man	Man	Q70MH4_YARLL	Yarrowia lipolytica (Candida lipolytica)
Retaining	GT32	CAG77919.1	F2Z6C7	Man	Man	F2Z6C7_YARLI	Yarrowia lipolytica (strain CLIB 122 / E 150) (Yeast) (Candida lipolytica)
Retaining	GT32	CAY67315.1	C4QVP2	Man	Man	C4QVP2_KOMPG	Komagataella phaffii (strain GS115 / ATCC 20864) (Yeast) (Pichia pastoris)
Retaining	GT32	EAL85572.1	Q4WDG6	Man	Man	Q4WDG6_ASPFU	Neosartorya fumigata (strain ATCC MYA-4609 / Af293 / CBS 101355 / FGSC A1100) (Aspergillus fumigatus)
Retaining	GT32	XP_327624.1	Q7SA25	Man	Man	Q7SA25_NEUCR	Neurospora crassa (strain ATCC 24698 / 74-OR23-1A / CBS 708.71 / DSM 1257 / FGSC 987)
Retaining	GT34	CAA19268.1	Q09174	Gal	Gal	GMA12_SCHPO	Schizosaccharomyces pombe (strain 972 / ATCC 24843) (Fission yeast)
Retaining	GT34	CAA93893.1	Q10359	Gal	Gal	GMH3_SCHPO	Schizosaccharomyces pombe (strain 972 / ATCC 24843) (Fission yeast)
Retaining	GT34	CAB38693.1	O94622	Gal	Gal	YBKD_SCHPO	Schizosaccharomyces pombe (strain 972 / ATCC 24843) (Fission yeast)
Retaining	GT34	CAB52246.1	Q9ST56	Gal	Gal	Q9ST56_TRIFG	Trigonella foenum-graecum (Fenugreek)
Retaining	GT34	CAD98924.1	Q7X9N4	Gal	Gal	Q7X9N4_LOTJA	Lotus japonicus (Lotus corniculatus var. japonicus)
Retaining	GT34	AAG52374.1	Q9CA75	Xyl	Others	XXT5_ARATH	Arabidopsis thaliana (Mouse-ear cress)
Retaining	GT34	AHC98116.1	X2CZ83	Xyl	Others	X2CZ83_PINRA	Pinus radiata (Monterey pine) (Pinus insignis)
Retaining	GT34	BAB11451.1	Q9LF80	Xyl	Others	XXT3_ARATH	Arabidopsis thaliana (Mouse-ear cress)
Retaining	GT34	CAB83122.1	Q9LZJ3	Xyl	Others	XXT1_ARATH	Arabidopsis thaliana (Mouse-ear cress)
Retaining	GT34	CAC01674.1	O22775	Xyl	Others	XXT2_ARATH	Arabidopsis thaliana (Mouse-ear cress)
Retaining	GT34	NP_173304.1	Q9M9U0	Xyl	Others	XXT4_ARATH	Arabidopsis thaliana (Mouse-ear cress)
Retaining	GT45	CAA54711.1	Q47332	GlcNAc	GlcNAc	Q47332_ECOLX	Escherichia coli
Retaining	GT45	ZP_03542636.1	B7X5D0	GlcA	Others	B7X5D0_COMTK	Comamonas testosteroni (strain DSM 14576 / KF-1)
Retaining	GT55	AAO43097.1	Q84B24	Man	Man	Q84B24_THETH	Thermus thermophilus
Retaining	GT55	AAP74552.1	Q6WSQ4	Man	Man	Q6WSQ4_RHOMR	Rhodothermus marinus (Rhodothermus obamensis)
Retaining	GT55	AAW39385.1	Q3Z6S5	Man	Man	Q3Z6S5_DEHM1	Dehalococcoides mccartyi (strain ATCC BAA-2266 / KCTC 15142 / 195) (Dehalococcoides ethenogenes (strain 195))
Retaining	GT55	AAY44813.1	Q2VPS1	Man	Man	Q2VPS1_9EURY	Palaeococcus ferrophilus
Retaining	GT55	AAY44815.1	Q2VPR9	Man	Man	Q2VPR9_THELI	Thermococcus litoralis
Retaining	GT55	BAA30023.1	O58689	Man	Man	MPGS_PYRHO	Pyrococcus horikoshii (strain ATCC 700860 / DSM 12428 / JCM 9974 / NBRC 100139 / OT-3)
Retaining	GT55	ELQ42360.1	L7IGQ9	Man	Man	L7IGQ9_MAGOY	Magnaporthe oryzae (strain Y34) (Rice blast fungus) (Pyricularia oryzae)
Retaining	GT55	KHE83765.1	A0A0B0E0L9	Man	Man	A0A0B0E0L9_NEUCS	Neurospora crassa
Retaining	GT55	WP_010868345.1	Q9UZC1	Man	Man	MPGS_PYRAB	Pyrococcus abyssi (strain GE5 / Orsay)
Retaining	GT6	AAA30558.1	P14769	Gal	Gal	GGTA1_BOVIN	Bos taurus (Bovine)
Retaining	GT6	AAA37657.1	P23336	Gal	Gal	GGTA1_MOUSE	Mus musculus (Mouse)
Retaining	GT6	AAA73558.1	P50127	Gal	Gal	GGTA1_PIG	Sus scrofa (Pig)
Retaining	GT6	AAD26574.1	P16442	Gal	Gal	BGAT_HUMAN	Homo sapiens (Human)
Retaining	GT6	AAF82757.1	A0A4Z3	Gal	Gal	A3LT2_RAT	Rattus norvegicus (Rat)
Retaining	GT6	AAK56499.1	Q8SPR2	Gal	Gal	GGTA1_SAPAP	Sapajus apella (Brown-capped capuchin) (Cebus apella)
Retaining	GT6	AAM17885.1	Q28855	Gal	Gal	Q28855_9PRIM	Platyrrhini (New World monkeys)
Retaining	GT6	AAM74957.1	Q3L7M0	Gal	Gal	GGTA1_RAT	Rattus norvegicus (Rat)
Retaining	GT6	AAV80756.1	Q5JBG6	Gal	Gal	WBNI_ECOLX	Escherichia coli
Retaining	GT6	NP_001073907	U3KPV4	Gal	Gal	A3LT2_HUMAN	Homo sapiens (Human)
Retaining	GT6	AAF06145.1	Q8N5D6	GalNAc	GalNAc	GBGT1_HUMAN	Homo sapiens (Human)
Retaining	GT6	AAL37034.1	Q8VI38	GalNAc	GalNAc	GBGT1_MOUSE	Mus musculus (Mouse)
Retaining	GT6	AFB74122.1	H6VPB4	GalNAc	GalNAc	H6VPB4_HUMAN	Homo sapiens (Human)
Retaining	GT6	CBG40459.1	D3UIY4	GalNAc	GalNAc	D3UIY4_HELM1	Helicobacter mustelae (strain ATCC 43772 / LMG 18044 / NCTC 12198 / 12198) (Campylobacter mustelae)
Retaining	GT6	EDO12433.1	A7LVT2	GalNAc	GalNAc	A7LVT2_BACO1	Bacteroides ovatus (strain ATCC 8483 / DSM 1896 / JCM 5824 / NCTC 11153)
Retaining	GT60	AAK56291.1	Q8T1C6	GlcNAc	GlcNAc	GNT1_DICDI	Dictyostelium discoideum (Slime mold)
Retaining	GT60	ACC85614.1	B2M0V2	GlcNAc	GlcNAc	B2M0V2_TRYCR	Trypanosoma cruzi
Retaining	GT60	ACC85615.1	B2M0V3	GlcNAc	GlcNAc	B2M0V3_TRYCR	Trypanosoma cruzi
Retaining	GT60	CEF98033.1	A0A090N3F6	GlcNAc	GlcNAc	A0A090N3F6_OSTTA	Ostreococcus tauri
Retaining	GT60	KND02831.1	A0A0L0HN37	GlcNAc	GlcNAc	A0A0L0HN37_SPIPD	Spizellomyces punctatus (strain DAOM BR117)
Retaining	GT60	WP_050138448.1	UPI0005DD159C	GlcNAc	GlcNAc	-	Yersinia enterocolitica
Retaining	GT60	XP_008604164.1	T0R725	GlcNAc	GlcNAc	T0R725_SAPDV	Saprolegnia diclina (strain VS20)
Retaining	GT62	AAB65006	P32629	Man	Man	ANP1_YEAST	Saccharomyces cerevisiae (strain ATCC 204508 / S288c) (Baker's yeast)
Retaining	GT62	AAB68171.1	P39107	Man	Man	MNN9_YEAST	Saccharomyces cerevisiae (strain ATCC 204508 / S288c) (Baker's yeast)
Retaining	GT64	AAB07008.1	Q93063	GlcNAc	GlcNAc	EXT2_HUMAN	Homo sapiens (Human)
Retaining	GT64	AAB62283.1	Q16394	GlcNAc	GlcNAc	EXT1_HUMAN	Homo sapiens (Human)
Retaining	GT64	AAC02898.1	Q9UBQ6	GlcNAc	GlcNAc	EXTL2_HUMAN	Homo sapiens (Human)
Retaining	GT64	AAC35386.1	O77783	GlcNAc	GlcNAc	EXT2_BOVIN	Bos taurus (Bovine)
Retaining	GT64	AAC39598.1	O43909	GlcNAc	GlcNAc	EXTL3_HUMAN	Homo sapiens (Human)
Retaining	GT64	AAC51141.1	Q92935	GlcNAc	GlcNAc	EXTL1_HUMAN	Homo sapiens (Human)
Retaining	GT64	AAD34749.1	Q9XZ08	GlcNAc	GlcNAc	EXT3_DROME	Drosophila melanogaster (Fruit fly)
Retaining	GT64	AAD42040.1	Q9WVL6	GlcNAc	GlcNAc	EXTL3_MOUSE	Mus musculus (Mouse)
Retaining	GT64	AAF71276.1	Q9JK82	GlcNAc	GlcNAc	EXT1_CRIGR	Cricetulus griseus (Chinese hamster) (Cricetulus barabensis griseus)
Retaining	GT64	AAG17542.1	Q9ES89	GlcNAc	GlcNAc	EXTL2_MOUSE	Mus musculus (Mouse)
Retaining	GT77	ABC67744.1	Q54RP0	Gal	Gal	AGTA_DICDI	Dictyostelium discoideum (Slime mold)
Retaining	GT77	AAC72867.1	Q9ZSJ2	Xyl	Others	RGXT1_ARATH	Arabidopsis thaliana (Mouse-ear cress)
Retaining	GT77	AAG51917.1	Q9C9Q5	Ara	Others	RRA2_ARATH	Arabidopsis thaliana (Mouse-ear cress)
Retaining	GT77	AAG51930.1	Q9C9Q6	Ara	Others	RRA1_ARATH	Arabidopsis thaliana (Mouse-ear cress)
Retaining	GT77	AAG52325.1	F4I6V0	Ara	Others	RAY1_ARATH	Arabidopsis thaliana (Mouse-ear cress)
Retaining	GT77	AAL67023.1	Q8VXZ5	Ara	Others	XG113_ARATH	Arabidopsis thaliana (Mouse-ear cress)
Retaining	GT77	AAM65662.1	Q9LN62	Ara	Others	RRA3_ARATH	Arabidopsis thaliana (Mouse-ear cress)
Retaining	GT77	BAC42064.1	Q9FXA7	Xyl	Others	RGXT3_ARATH	Arabidopsis thaliana (Mouse-ear cress)
Retaining	GT77	CAB77745.1	Q9ZSJ0	Xyl	Others	RGXT2_ARATH	Arabidopsis thaliana (Mouse-ear cress)
Retaining	GT77	CAB80931.1	Q9M146	Xyl	Others	MGP4_ARATH	Arabidopsis thaliana (Mouse-ear cress)
Retaining	GT78	AAF16905.1	Q9RFR0	Man	Man	MGS_RHOMR	Rhodothermus marinus (Rhodothermus obamensis)
Retaining	GT78	AAM93991.1	Q7XZ33	Man	Man	Q7XZ33_GRIJA	Griffithsia japonica (Red alga)
Retaining	GT78	AIC73644.1	A0A060L3Y0	Man	Man	A0A060L3Y0_9FLOR	Caloglossa leprieurii
Retaining	GT78	EFJ20192.1	D8S5L4	Man	Man	D8S5L4_SELML	Selaginella moellendorffii (Spikemoss)
Retaining	GT78	XP_001764114.1	A9SCP3	Man	Man	A9SCP3_PHYPA	Physcomitrella patens subsp. patens (Moss)
Retaining	GT81	ABK73566.1	A0R2E6	Glc	Glc	GPGS_MYCS2	Mycolicibacterium smegmatis (strain ATCC 700084 / mc(2)155) (Mycobacterium smegmatis)
Retaining	GT81	ABX30820.1	A9BEU2	Glc	Glc	GGS_PETMO	Petrotoga mobilis (strain DSM 10674 / SJ95)
Retaining	GT81	ABX31861.1	A9BHI9	Glc	Glc	GPGS_PETMO	Petrotoga mobilis (strain DSM 10674 / SJ95)
Retaining	GT81	ABX75857.1	A9QXB4	Glc	Glc	A9QXB4_9AQUI	Persephonella marina
Retaining	GT81	CAB07831.1	Q7U0E1	Glc	Glc	GPGS_MYCBO	Mycobacterium bovis (strain ATCC BAA-935 / AF2122/97)
Retaining	GT81	ERG90383.1	U1N230	Glc	Glc	U1N230_9EURY	Haloquadratum walsbyi J07HQW1
Retaining	GT81	SIT99841.1	Q7U0E1	Glc	Glc	GPGS_MYCBO	Mycobacterium bovis (strain ATCC BAA-935 / AF2122/97)
Retaining	GT81	WP_014143196.1	F8K032	Glc	Glc	F8K032_STREN	Streptomyces cattleya (strain ATCC 35852 / DSM 46488 / JCM 4925 / NBRC 14057 / NRRL 8057)
Retaining	GT81	WP_016956884.1	UPI0002FF35DE	Glc	Glc	-	Catenovulum agarivorans
Retaining	GT81	WP_028321107.1	UPI00040C3EFE	Glc	Glc	-	Desulfatiglans anilini
Retaining	GT81	WP_048194744.1	A0A099SXR5	Glc	Glc	A0A099SXR5_METMT	Methanococcoides methylutens
Retaining	GT81	ZP_00561711.1	Q12XX4	Glc	Glc	GPGS_METBU	Methanococcoides burtonii (strain DSM 6242 / NBRC 107633 / OCM 468 / ACE-M)
Retaining	GT88	AAU27450.1	Q5ZVS2	Glc	Glc	Q5ZVS2_LEGPH	Legionella pneumophila subsp. pneumophila (strain Philadelphia 1 / ATCC 33152 / DSM 7513)
Retaining	GT88	AAU27570.1	Q5ZVF2	Glc	Glc	Q5ZVF2_LEGPH	Legionella pneumophila subsp. pneumophila (strain Philadelphia 1 / ATCC 33152 / DSM 7513)
Retaining	GT88	AAU28909.1	Q5ZRL9	Glc	Glc	Q5ZRL9_LEGPH	Legionella pneumophila subsp. pneumophila (strain Philadelphia 1 / ATCC 33152 / DSM 7513)
Retaining	GT88	CAH15559.1	Q5WWY0	Glc	Glc	Q5WWY0_LEGPL	Legionella pneumophila (strain Lens)
Retaining	GT88	CEG56091.1	A0A098G279	Glc	Glc	A0A098G279_9GAMM	Legionella fallonii LLAP-10
Retaining	GT8-Fun	CAA62175.1_2	Q12096	GlcNAc	GlcNAc	GNT1_YEAST	Saccharomyces cerevisiae (strain ATCC 204508 / S288c) (Baker's yeast)
Retaining	GT8-Fun	CAA62175.1	Q12096	GlcNAc	GlcNAc	GNT1_YEAST	Saccharomyces cerevisiae (strain ATCC 204508 / S288c) (Baker's yeast)
Retaining	GT8-Fun	CRK43273.1	A0A0G4NA22	GlcNAc	GlcNAc	A0A0G4NA22_9PEZI	Verticillium longisporum
Retaining	GT8-Fun	XP_009830908.1	W4GJW0	GlcNAc	GlcNAc	W4GJW0_9STRA	Aphanomyces astaci
Retaining	GT8-Fun	XP_013904179.1	A0A0D2MRG1	GlcNAc	GlcNAc	A0A0D2MRG1_9CHLO	Monoraphidium neglectum
Retaining	GT8-GATL	AAD07221.1	O24967	Glc	Glc	O24967_HELPY	Helicobacter pylori (strain ATCC 700392 / 26695) (Campylobacter pylori)
Retaining	GT8-GATL	AAD08459.1	O25962	Glc	Glc	O25962_HELPY	Helicobacter pylori (strain ATCC 700392 / 26695) (Campylobacter pylori)
Retaining	GT8-GATL	AAD06608.1	Q9ZKA7	GlcNAc	GlcNAc	Q9ZKA7_HELPJ	Helicobacter pylori (strain J99 / ATCC 700824) (Campylobacter pylori J99)
Retaining	GT8-GAUT	CAB71043.1	Q9LE59	GalA	Others	GAUT1_ARATH	Arabidopsis thaliana (Mouse-ear cress)
Retaining	GT8-Glycogenin	AAD26116.1	Q9XEJ7	Gal	Gal	Q9XEJ7_BRANA	Brassica napus (Rape)
Retaining	GT8-Glycogenin	AAL26804.1	Q947G8	Gal	Gal	GOLS1_SOLLC	Solanum lycopersicum (Tomato) (Lycopersicon esculentum)
Retaining	GT8-Glycogenin	AAM96867.1	Q7XZ08	Gal	Gal	Q7XZ08_SOYBN	Glycine max (Soybean) (Glycine hispida)
Retaining	GT8-Glycogenin	AAM96868.1	Q7XZ07	Gal	Gal	Q7XZ07_FAGES	Fagopyrum esculentum (Common buckwheat) (Polygonum fagopyrum)
Retaining	GT8-Glycogenin	AAM96870.1	Q7XZ05	Gal	Gal	Q7XZ05_FAGES	Fagopyrum esculentum (Common buckwheat) (Polygonum fagopyrum)
Retaining	GT8-Glycogenin	AAM97493.1	Q84MZ5	Gal	Gal	Q84MZ5_MEDSA	Medicago sativa (Alfalfa)
Retaining	GT8-Glycogenin	AAQ07248.1	Q5DVS7	Gal	Gal	Q5DVS7_MAIZE	Zea mays (Maize)
Retaining	GT8-Glycogenin	AAQ07249.1	Q5DVS6	Gal	Gal	Q5DVS6_MAIZE	Zea mays (Maize)
Retaining	GT8-Glycogenin	CAA16830.1	O43061	Gal	Gal	MU136_SCHPO	Schizosaccharomyces pombe (strain 972 / ATCC 24843) (Fission yeast)
Retaining	GT8-Glycogenin	CAA16831.1	O43062	Gal	Gal	YGT9_SCHPO	Schizosaccharomyces pombe (strain 972 / ATCC 24843) (Fission yeast)
Retaining	GT8-Glycogenin	CAA89962.1	Q09680	Gal	Gal	YA0C_SCHPO	Schizosaccharomyces pombe (strain 972 / ATCC 24843) (Fission yeast)
Retaining	GT8-Glycogenin	CAB51533.1	Q9XGN4	Gal	Gal	GOLS1_AJURE	Ajuga reptans (Bugle)
Retaining	GT8-Glycogenin	AAA31404.1	P13280	Glc	Glc	GLYG_RABIT	Oryctolagus cuniculus (Rabbit)
Retaining	GT8-Glycogenin	AAA91644.1	P47011	Glc	Glc	GLG2_YEAST	Saccharomyces cerevisiae (strain ATCC 204508 / S288c) (Baker's yeast)
Retaining	GT8-Glycogenin	AAA91646.1	P36143	Glc	Glc	GLG1_YEAST	Saccharomyces cerevisiae (strain ATCC 204508 / S288c) (Baker's yeast)
Retaining	GT8-Glycogenin	AAB84377.1	O15488	Glc	Glc	GLYG2_HUMAN	Homo sapiens (Human)
Retaining	GT8-Glycogenin	AAH00033.1	P46976	Glc	Glc	GLYG_HUMAN	Homo sapiens (Human)
Retaining	GT8-Glycogenin	AAH29903.1	Q9R062	Glc	Glc	GLYG_MOUSE	Mus musculus (Mouse)
Retaining	GT8-Glycogenin	AAH70944.1	O08730	Glc	Glc	GLYG_RAT	Rattus norvegicus (Rat)
Retaining	GT8-Glycogenin	CAD70922.1	Q871S1	Glc	Glc	Q871S1_NEUCS	Neurospora crassa
Retaining	GT8-Glycogenin	NP_741749.1	H2KYQ5	Glc	Glc	GYG1_CAEEL	Caenorhabditis elegans
Retaining	GT8-Glycogenin	BAB01792.1	Q9LSB1	GlcA	Others	GUX1_ARATH	Arabidopsis thaliana (Mouse-ear cress)
Retaining	GT8-Glycogenin	BAC43192.1	Q8GWW4	GlcA	Others	GUX2_ARATH	Arabidopsis thaliana (Mouse-ear cress)
Retaining	GT8-Glycogenin	NP_197349.1	UPI00000ADFDF	GlcA	Others	-	Arabidopsis thaliana (Mouse-ear cress); Rattus norvegicus (Rat)
Retaining	GT8-LpsGlt	AAA68011.1	Q50948	Gal	Gal	Q50948_NEIGO	Neisseria gonorrhoeae
Retaining	GT8-LpsGlt	AAB48385.1	P96945	Gal	Gal	P96945_NEIME	Neisseria meningitidis
Retaining	GT8-LpsGlt	AAC98416.1	Q48484	Gal	Gal	Q48484_KLEPN	Klebsiella pneumoniae
Retaining	GT8-LpsGlt	AAK75840.1	A0A0H2URH2	Gal	Gal	GLYF_STRPN	Streptococcus pneumoniae serotype 4 (strain ATCC BAA-334 / TIGR4)
Retaining	GT8-LpsGlt	AAK75841.1	A0A0H2URJ6	Gal	Gal	GLYE_STRPN	Streptococcus pneumoniae serotype 4 (strain ATCC BAA-334 / TIGR4)
Retaining	GT8-LpsGlt	AAL22577.1	P19816	Gal	Gal	RFAI_SALTY	Salmonella typhimurium (strain LT2 / SGSC1412 / ATCC 700720)
Retaining	GT8-LpsGlt	AEO88441.1	G3GFZ0	Gal	Gal	G3GFZ0_STREE	Streptococcus pneumoniae
Retaining	GT8-LpsGlt	AAC16411.1	P19817	Glc	Glc	RFAJ_SALTY	Salmonella typhimurium (strain LT2 / SGSC1412 / ATCC 700720)
Retaining	GT8-LpsGlt	AAC69652.1	O68204	Glc	Glc	O68204_ECOLX	Escherichia coli
Retaining	GT8-LpsGlt	AAC69663.2	Q9ZIT6	Glc	Glc	Q9ZIT6_ECOLX	Escherichia coli
Retaining	GT8-LpsGlt	AAC69676.1	Q9ZIS5	Glc	Glc	Q9ZIS5_ECOLX	Escherichia coli
Retaining	GT8-LpsGlt	AAC76650.1	P27129	Glc	Glc	RFAJ_ECOLI	Escherichia coli (strain K12)
Retaining	GT8-LpsGlt	AAC76651.1	P27128	Glc	Glc	RFAI_ECOLI	Escherichia coli (strain K12)
Retaining	GT8-LpsGlt	AAG58771.1	A0A4Q2TPT0	Glc	Glc	A0A4Q2TPT0_ECO57	Escherichia coli O157:H7
Retaining	GT8-LpsGlt	BAB37925.1	Q8XDC2	Glc	Glc	Q8XDC2_ECO57	Escherichia coli O157:H7
Retaining	GT8-Lrg	BAC04675.1_2	Q8N3Y3	Xyl	Others	LARG2_HUMAN	Homo sapiens (Human)
Retaining	GT8-Lrg	BAC04675.1	Q8N3Y3	Xyl	Others	LARG2_HUMAN	Homo sapiens (Human)
Retaining	GT8-Lrg	CAA07571.1_2	O95461	Xyl	Others	LARG1_HUMAN	Homo sapiens (Human)
Retaining	GT8-Lrg	CAA07571.1	O95461	Xyl	Others	LARG1_HUMAN	Homo sapiens (Human)
Retaining	GT8-Lrg	XP_002472865.1	B8PB08	Xyl	Others	B8PB08_POSPM	Postia placenta (strain ATCC 44394 / Madison 698-R) (Brown rot fungus) (Poria monticola)
Retaining	GT8-Lrg	XP_004365036.2	A0A0D2VFJ7	Xyl	Others	A0A0D2VFJ7_CAPO3	Capsaspora owczarzaki (strain ATCC 30864)
Retaining	GT8-Lrg	XP_004644052.1	UPI000333F364	Xyl	Others	-	Octodon degus (Degu) (Sciurus degus)
Retaining	GT8-Lrg	XP_005646635.1	I0YUM2	Xyl	Others	I0YUM2_COCSC	Coccomyxa subellipsoidea (strain C-169) (Green microalga)
Retaining	GT8-Lrg	XP_011063367.1	UPI000581014F	Xyl	Others	-	Acromyrmex echinatior (Panamanian leafcutter ant) (Acromyrmex octospinosus echinatior)
Retaining	GT8-Lrg	XP_011880617.1	UPI0005F41FD7	Xyl	Others	-	Vollenhovia emeryi
Retaining	GT8-XylT	NP_001073862.1	A0PJZ3	Xyl	Others	GXLT2_HUMAN	Homo sapiens (Human)
Retaining	GT8-XylT	NP_941014.1	Q810K9	Xyl	Others	GXLT2_MOUSE	Mus musculus (Mouse)
Retaining	GT8-XylT	XP_005646365.1	I0YTV2	Xyl	Others	I0YTV2_COCSC	Coccomyxa subellipsoidea (strain C-169) (Green microalga)
Retaining	GT8-XylT	XP_008548664.1	UPI0004CDC016	Xyl	Others	-	Microplitis demolitor
Retaining	GT8-XylT	XP_009035674.1	F0Y693	Xyl	Others	F0Y693_AURAN	Aureococcus anophagefferens (Harmful bloom alga)
Retaining	GT8-XylT	XP_290597.4	Q4G148	Xyl	Others	GXLT1_HUMAN	Homo sapiens (Human)
