# Supplementary material for: Deep evolutionary analysis reveals the design principles of fold A glycosyltransferases
Source: eLife journal article supplement (doi:10.7554/elife.54532), 2020-04-01
Supplement: supp [file elife-54532-supp-v1.zip › elife_poa_e54532_Figure_6_source_data_2.xlsx]

## Sheet: Sequence distribution
Figure 6-source data 2: Distribution of sequences across different families. The counts in this table were mapped in to the phylogenetic tree in Figure 6- figure supplement 2.
GT-Family	Number of sequences in training set	Number of sequences in prediction set
GT12	10	0
GT13	19	1
GT14	26	29
GT15	16	0
GT16	10	0
GT17	20	0
GT2-B3GntL	5	1
GT2-Bre3	8	0
GT2-CeS	32	34
GT2-Chitin-HAS	27	7
GT2-CHS	4	0
GT2-Class1	45	0
GT2-CWR	9	3
GT2-DPs	27	5
GT2-LpsRelated	13	0
GT2-Rham-GlfT	10	0
GT21	12	1
GT24	19	0
GT25	18	3
GT27	51	9
GT31-Chsy	6	4
GT31-Euk	5	13
GT31-Fringe	7	2
GT31-Galt-Gnt	24	28
GT31-Glt	9	32
GT32	18	10
GT34	11	4
GT40	7	0
GT43	12	9
GT45	2	0
GT49	8	11
GT54	15	2
GT55	9	0
GT6	15	2
GT60	7	0
GT62	2	1
GT64	10	6
GT67	6	1
GT7	28	5
GT75	24	0
GT77	10	10
GT78	5	0
GT8-Fun	5	0
GT8-GATL	3	10
GT8-GAUT	1	16
GT8-Glycogenin	24	19
GT8-LpsGlt	15	1
GT8-Lrg	8	2
GT8-XylT	6	1
GT81	12	0
GT82	6	0
GT84	7	0
GT88	5	0
