# Supplementary material for: Deep evolutionary analysis reveals the design principles of fold A glycosyltransferases
Source: eLife journal article supplement (doi:10.7554/elife.54532), 2020-04-01
Supplement: supp [file elife-54532-supp-v1.zip › elife_poa_e54532_Figure_7_source_data_1.xlsx]

## Sheet: Sheet1
Figure 7-source data 1: Feature Importance comparison for the full GDBT model with its importance for each sugar donor type. "GDBT_full" columns include the rank and score for the 239 features in the GDBT model. Remaining columns show the rank and score for that same feature for the classification of the respective donor sugars. Feature positions ranked from 1-10 (most important) are colored red …
GDBT_full				Gal			GalNAc			Glc			GlcNAc			Man			Others
Rank #	Feature	ImportanceScore		Rank #	ImportanceScore		Rank #	ImportanceScore		Rank #	ImportanceScore		Rank #	ImportanceScore		Rank #	ImportanceScore		Rank #	ImportanceScore
1	Pos92_VOL	0.051564		226	0		1	0.342353		139	9.15051e-05		234	0		199	0		201	0
2	Pos68_ASA	0.0387778		25	0.010517		226	0		197	0		1	0.155399		139	1.24644e-06		42	0.00406503
3	Pos183_VOL	0.0355445		152	2.79015e-05		128	1.26243e-05		2	0.117487		23	0.0122274		164	0		14	0.0152415
4	Pos153_POL	0.0328838		212	0		223	0		1	0.124191		200	0		235	0		108	0.000242303
5	Pos69_VOL	0.0272656		82	0.000761549		232	0		3	0.0974921		53	0.00391493		219	0		94	0.000399393
6	Pos90_HYD	0.0270107		229	0		221	0		202	0		34	0.00666733		196	0		1	0.167711
7	Pos66_ASA	0.0215414		98	0.000449266		222	0		209	0		124	0.000129759		1	0.152813		211	0
8	Pos155_ASA	0.0193646		30	0.0089688		114	3.52905e-05		218	0		3	0.0623528		233	0		222	0
9	Pos119_ASA	0.0182646		154	2.37892e-05		2	0.0954384		51	0.00399813		128	9.84664e-05		118	1.99004e-05		37	0.00493574
10	Pos67_VOL	0.0174843		59	0.00287736		214	0		223	0		26	0.0110636		203	0		2	0.0956164
11	Pos209_HYD	0.0168945		54	0.00356433		59	0.000982748		181	0		146	3.82225e-05		11	0.0253013		5	0.0585906
12	Pos88_ASA	0.0166658		1	0.0833484		141	1.00906e-06		219	0		125	0.000125791		194	0		39	0.00438186
13	Pos4_ASA	0.015785		209	0		4	0.0595039		19	0.011368		211	0		98	9.9662e-05		162	0
14	Pos159_VOL	0.0153906		53	0.00380015		72	0.000556488		109	0.000565321		2	0.0661008		50	0.00257203		138	1.7357e-05
15	Pos77_POL	0.0149025		2	0.0686389		33	0.00398306		27	0.00711517		212	0		133	2.98835e-06		207	0
16	Pos24_POL	0.0133827		195	0		159	0		4	0.0422364		43	0.00496173		45	0.00319289		154	0
17	Pos161_HYD	0.0133644		23	0.0133628		47	0.00205655		5	0.0368265		107	0.000256821		227	0		218	0
18	Pos176_VOL	0.0127406		102	0.00041534		47	0.0519684		58	0.00312056		110	0.000238395		60	0.00145675		88	0.000493308
19	Pos95_VOL	0.0114449		223	0		203	0		99	0.000762546		152	1.1093e-05		204	0		4	0.0594915
20	Pos78_HYD	0.011222		70	0.00175229		190	0		6	0.0351219		19	0.0135308		86	0.000216489		29	0.00660046
21	Pos97_POL	0.0109511		4	0.0489277		201	0		165	1.30173e-06		232	0		112	3.14532e-05		68	0.00103839
22	Pos4_CHA	0.0108506		142	5.53929e-05		3	0.0875849		205	0		227	0		210	0		194	0
23	Pos156_ASA	0.0107806		64	0.00269098		220	0		220	0		5	0.0397962		114	2.9165e-05		136	4.54249e-05
24	Pos152_POL	0.0107652		83	0.000746984		116	3.13808e-05		52	0.00392669		9	0.0276362		237	0		239	0
25	Pos101_ASA	0.0103051		3	0.0512544		198	0		132	0.000131523		229	0		142	4.7266e-07		196	0
26	Pos181_ASA	0.0101504		96	0.000501572		180	0		15	0.0136098		10	0.0243172		68	0.000860323		178	0
27	Pos187_HYD	0.0101099		6	0.0342529		44	0.00266966		101	0.00065642		95	0.000468013		183	0		73	0.000952755
28	Pos119_POL	0.0101025		37	0.00728435		238	0		20	0.00978414		220	0		191	0		6	0.0514331
29	Pos151_POL	0.00990369		14	0.024834		131	8.03849e-06		35	0.0054097		39	0.00542492		138	1.45229e-06		150	1.28818e-07
30	Pos187_VOL	0.00959001		18	0.0192073		87	0.000201209		127	0.000187766		61	0.00269219		4	0.055783		32	0.00636353
31	Pos110_VOL	0.00958689		136	7.69557e-05		193	0		211	0		6	0.0368042		125	1.17787e-05		190	0
32	Pos192_ASA	0.00939261		112	0.000199106		8	0.0258015		189	0		14	0.0191821		113	2.99584e-05		133	5.82802e-05
33	Pos193_POL	0.00928032		134	8.85878e-05		162	0		188	0		173	0		121	1.76031e-05		3	0.0674614
34	Pos171_ASA	0.00919144		35	0.00763221		154	0		8	0.0261597		118	0.00015115		83	0.000235676		26	0.00735585
35	Pos96_VOL	0.00899989		45	0.00530645		202	0		204	0		4	0.0436534		205	0		137	3.41362e-05
36	Pos67_POL	0.00877651		132	9.45911e-05		224	0		46	0.00438979		16	0.0172536		186	0		12	0.0196563
37	Pos65_HYD	0.0084929		13	0.0250924		184	0		198	0		63	0.00261267		43	0.00348105		8	0.0279811
38	Pos177_VOL	0.00832819		176	0		11	0.012557		23	0.00867401		121	0.000143826		27	0.0105386		160	0
39	Pos149_VOL	0.0083083		21	0.0151138		6	0.0303507		141	7.43673e-05		97	0.000462604		108	3.65949e-05		214	0
40	Pos200_VOL	0.00799741		105	0.000307944		91	0.000130701		9	0.025394		78	0.00120563		13	0.0232485		165	0
41	Pos67_ASA	0.00786612		130	9.9554e-05		225	0		66	0.00249436		195	0		190	0		7	0.0499865
42	Pos94_HYD	0.00780552		19	0.0175938		205	0		75	0.00178778		157	4.02594e-06		6	0.045296		44	0.00387727
43	Pos152_ASA	0.00778178		49	0.00431222		36	0.00347847		7	0.0282393		216	0		236	0		92	0.000423207
44	Pos72_POL	0.00729402		121	0.000146027		32	0.00429601		121	0.000365276		83	0.00101274		2	0.0696488		121	0.000120185
45	Pos89_VOL	0.00714746		66	0.00256544		183	0		140	9.11827e-05		38	0.00544155		21	0.0135535		11	0.0252078
46	Pos180_ASA	0.00703106		27	0.0100386		94	9.55781e-05		105	0.000595441		69	0.0017552		3	0.0569529		91	0.000436275
47	Pos65_POL	0.00692077		5	0.0345189		60	0.00085277		195	0		117	0.000157186		188	0		23	0.00857103
48	Pos36_VOL	0.00683929		106	0.000286804		130	8.45308e-06		26	0.00736879		12	0.0220098		160	0		229	0
49	Pos207_VOL	0.00657489		8	0.0320391		151	0		148	5.39617e-05		170	0		168	0		163	0
50	Pos70_VOL	0.00644354		238	0		31	0.00441846		93	0.00105542		29	0.00875605		26	0.0116909		10	0.0257922
51	Pos120_ASA	0.00634729		9	0.0313465		236	0		216	0		219	0		105	4.62744e-05		62	0.00112532
52	Pos153_ASA	0.00608656		17	0.0208109		136	4.47778e-06		200	0		102	0.00035529		17	0.0178407		85	0.000569405
53	Pos6_POL	0.00574415		15	0.0246792		161	0		90	0.0012514		42	0.00496742		166	0		51	0.00226471
54	Pos31_HYD	0.00573426		193	0		24	0.00610011		117	0.000426743		18	0.0143435		78	0.000415923		28	0.00707969
55	Pos77_VOL	0.00553698		233	0		46	0.00222946		36	0.00510784		70	0.00166555		217	0		104	0.00026575
56	Pos174_VOL	0.00547193		7	0.0331861		107	4.61207e-05		10	0.0246116		154	8.46332e-06		154	0		158	0
57	Pos23_ASA	0.00541038		196	0		34	0.00385824		103	0.000646038		17	0.0144651		132	5.08276e-06		153	0
58	Pos163_VOL	0.0053001		10	0.0284191		50	0.00159407		162	3.3792e-06		85	0.000948141		94	0.000135036		65	0.00109272
59	Pos193_ASA	0.00518497		58	0.00293792		119	2.53294e-05		187	0		66	0.00247514		16	0.0182395		59	0.00165976
60	Pos207_POL	0.00507282		36	0.00756907		82	0.000253318		115	0.000434146		172	0		170	0		9	0.0274683
61	Pos121_VOL	0.00483912		217	0		233	0		213	0		144	4.44531e-05		7	0.0415045		113	0.000184053
62	Pos179_ASA	0.00482233		68	0.00210589		158	0		174	0		183	0		22	0.0126889		50	0.00240676
63	Pos178_HYD	0.00467033		89	0.000654301		148	0		33	0.00565448		7	0.0323094		127	1.10566e-05		181	0
64	Pos101_VOL	0.00451648		158	9.42725e-06		61	0.000847818		113	0.000477552		65	0.00250217		18	0.0173115		195	0
65	Pos182_ASA	0.0044603		173	0		13	0.0112128		11	0.0235084		180	0		153	0		125	8.17258e-05
66	Pos154_HYD	0.00443379		110	0.000238458		18	0.00766347		156	2.74292e-05		41	0.00521917		23	0.0126512		127	7.91535e-05
67	Pos76_HYD	0.004328		16	0.0241942		79	0.000317339		236	0		22	0.01226		231	0		41	0.00411072
68	Pos113_VOL	0.00418917		20	0.0161325		80	0.000284442		18	0.0118786		98	0.000424205		212	0		187	0
69	Pos184_VOL	0.00417033		11	0.0275789		10	0.0142587		128	0.000175232		60	0.00310764		187	0		174	0
70	Pos69_POL	0.00411964		213	0		117	2.87382e-05		84	0.00142448		62	0.00265009		5	0.0543196		188	0
71	Pos195_VOL	0.00407397		166	0		149	0		61	0.00279808		15	0.0178494		171	0		79	0.000784331
72	Pos148_HYD	0.00404903		215	0		124	2.0163e-05		68	0.00237037		21	0.0122909		215	0		77	0.000833313
73	Pos61_VOL	0.00401624		210	0		135	4.7369e-06		65	0.00255265		25	0.0117342		151	0		35	0.00567696
74	Pos89_ASA	0.00396376		231	0		207	0		12	0.0193516		215	0		31	0.00802181		130	7.56545e-05
75	Pos35_ASA	0.00374552		190	0		155	0		25	0.00770876		33	0.00724986		49	0.00265091		226	0
76	Pos61_POL	0.00366501		12	0.0253852		216	0		155	3.1861e-05		197	0		155	0		237	0
77	Pos148_VOL	0.00356157		56	0.00321035		35	0.00377976		22	0.00931451		71	0.00165386		74	0.000632934		31	0.00640158
78	Pos155_VOL	0.00353846		183	0		62	0.000822564		14	0.0162308		129	9.40307e-05		232	0		76	0.000870137
79	Pos75_POL	0.003507		237	0		139	2.86234e-06		235	0		11	0.0223142		59	0.00150642		114	0.000181191
80	Pos192_HYD	0.00343097		156	1.37192e-05		90	0.000135753		13	0.0177221		174	0		178	0		169	0
81	Pos117_VOL	0.00336876		220	0		227	0		56	0.00323065		143	4.58404e-05		106	4.4872e-05		143	8.29737e-06
82	Pos178_ASA	0.00331451		32	0.00838427		27	0.0052852		175	0		52	0.00402377		30	0.00843752		101	0.000308939
83	Pos88_VOL	0.00331199		72	0.00149448		206	0		59	0.00302386		20	0.0131462		92	0.000151554		63	0.00110904
84	Pos60_HYD	0.00321814		185	0		7	0.0293851		167	0		198	0		102	5.89157e-05		13	0.0164751
85	Pos126_VOL	0.00315356		31	0.00881196		73	0.000536192		119	0.000388338		99	0.000418121		87	0.000201514		84	0.000616913
86	Pos20_HYD	0.00306641		200	0		172	0		38	0.00500816		111	0.000233536		20	0.0148981		172	0
87	Pos152_HYD	0.00299614		214	0		26	0.00542356		31	0.00665002		104	0.000309653		143	1.88782e-07		70	0.00101095
88	Pos48_POL	0.00290462		63	0.00272151		22	0.00720906		57	0.00315154		187	0		76	0.000549472		235	0
89	Pos115_HYD	0.00285986		50	0.00407055		95	9.13728e-05		48	0.00432891		130	9.34702e-05		211	0		38	0.00462336
90	Pos165_HYD	0.00282497		148	3.42436e-05		76	0.000419234		233	0		120	0.000147279		222	0		185	0
91	Pos151_ASA	0.00277749		97	0.000462247		30	0.00450252		53	0.0038928		64	0.00257736		136	1.5578e-06		18	0.0115099
92	Pos5_POL	0.00276537		163	2.48788e-06		169	0		63	0.00257138		126	0.000112592		12	0.0252101		141	1.04381e-05
93	Pos62_ASA	0.00276265		116	0.000161572		218	0		173	0		153	1.05933e-05		8	0.0287853		227	0
94	Pos176_POL	0.0027224		52	0.00383577		74	0.000474173		29	0.00678773		162	2.20198e-06		159	0		152	0
95	Pos113_ASA	0.00271165		127	0.00012498		191	0		108	0.000572064		223	0		141	6.28788e-07		16	0.0144269
96	Pos150_HYD	0.00264351		100	0.00042624		123	2.23512e-05		98	0.000863536		28	0.00878427		79	0.000395113		225	0
97	Pos33_VOL	0.00263324		47	0.00505131		51	0.00152811		81	0.00156568		58	0.00324054		40	0.00400876		223	0
98	Pos48_VOL	0.00255841		44	0.00532671		143	3.7075e-07		100	0.000754761		32	0.00725646		161	0		236	0
99	Pos70_HYD	0.00253183		92	0.000587003		237	0		21	0.00972922		191	0		224	0		193	0
100	Pos23_POL	0.00250726		197	0		182	0		24	0.00793856		48	0.00445252		137	1.55336e-06		157	0
101	Pos177_ASA	0.0025028		65	0.00261925		120	2.34982e-05		123	0.000312525		72	0.001362		150	0		21	0.0098307
102	Pos193_HYD	0.00246961		39	0.00707171		57	0.00114518		77	0.00174357		150	1.17448e-05		175	0		115	0.00016818
103	Pos88_CHA	0.00243708		38	0.00714626		186	0		221	0		214	0		101	7.40372e-05		208	0
104	Pos95_POL	0.00241606		162	3.81765e-06		142	4.34045e-07		72	0.00210336		115	0.000178625		15	0.0207095		66	0.00109244
105	Pos24_VOL	0.00240771		42	0.00563537		153	0		192	0		47	0.00449735		88	0.000196974		78	0.000816716
106	Pos31_POL	0.00221928		114	0.000179892		147	0		120	0.000375822		201	0		177	0		49	0.00262501
107	Pos169_POL	0.00218189		26	0.0100603		185	0		153	3.89962e-05		186	0		46	0.00315171		182	0
108	Pos91_HYD	0.00216151		41	0.00582482		210	0		145	6.01122e-05		237	0		129	9.16357e-06		45	0.00323419
109	Pos70_ASA	0.00212943		124	0.000135156		81	0.000282411		17	0.0120581		75	0.00125232		225	0		147	3.60834e-07
110	Pos116_HYD	0.00212176		221	0		85	0.000214268		28	0.00691061		221	0		42	0.00366872		212	0
111	Pos188_VOL	0.00209215		75	0.00113962		28	0.00484324		88	0.00127822		36	0.00591886		85	0.000218489		131	5.94963e-05
112	Pos71_ASA	0.00206219		155	2.11088e-05		19	0.00734732		16	0.0129065		190	0		229	0		199	0
113	Pos176_HYD	0.00193542		177	0		20	0.0073143		222	0		84	0.000975619		61	0.00140594		40	0.00426823
114	Pos31_VOL	0.00189691		126	0.000126688		64	0.000772527		194	0		77	0.0012242		67	0.000993347		47	0.00282851
115	Pos127_ASA	0.0018579		216	0		17	0.00771732		55	0.00382338		217	0		193	0		103	0.000266401
116	Pos121_HYD	0.00185698		86	0.0007187		16	0.0077533		136	0.000103325		218	0		97	0.000107613		233	0
117	Pos5_VOL	0.0018296		206	0		25	0.00593529		71	0.00220924		74	0.00127329		124	1.22646e-05		54	0.00188463
118	Pos68_HYD	0.00182489		67	0.00219581		41	0.00286527		130	0.000163806		193	0		70	0.000725187		30	0.00656923
119	Pos61_HYD	0.00182022		85	0.000720086		217	0		85	0.00137092		158	3.42304e-06		9	0.0275624		129	7.59463e-05
120	Pos32_ASA	0.00179436		192	0		98	7.54412e-05		47	0.00438657		44	0.00469914		14	0.0208766		217	0
121	Pos69_HYD	0.00163964		147	3.53504e-05		230	0		91	0.0012031		90	0.00061483		218	0		15	0.0144469
122	Pos209_VOL	0.00162068		239	0		99	7.03574e-05		144	6.59456e-05		13	0.0203367		239	0		86	0.000536854
123	Pos73_POL	0.00159759		78	0.0010021		125	2.00983e-05		125	0.000257193		30	0.00806784		230	0		90	0.000484151
124	Pos69_ASA	0.00157506		135	8.48075e-05		231	0		225	0		106	0.00026891		34	0.00658992		20	0.0100702
125	Pos35_POL	0.00153519		141	5.95935e-05		132	6.05359e-06		80	0.00162129		142	5.82401e-05		110	3.28453e-05		146	5.32917e-07
126	Pos85_VOL	0.00148853		153	2.41148e-05		9	0.0256961		152	4.00135e-05		96	0.000463203		123	1.3738e-05		132	5.91551e-05
127	Pos165_VOL	0.00145599		101	0.00041807		12	0.01141		231	0		59	0.00321866		131	7.96173e-06		175	0
128	Pos75_VOL	0.00144516		235	0		77	0.000406175		134	0.000105424		37	0.00554656		130	8.65161e-06		139	1.58155e-05
129	Pos86_HYD	0.00144298		84	0.000727707		196	0		40	0.00478598		159	3.25613e-06		192	0		209	0
130	Pos183_POL	0.0014199		99	0.000427424		177	0		168	0		127	0.000100004		152	0		43	0.00405061
131	Pos116_POL	0.00141188		149	3.29264e-05		187	0		215	0		222	0		47	0.00287766		17	0.0131004
132	Pos34_ASA	0.00133833		24	0.0120092		152	0		180	0		93	0.000558429		149	0		72	0.000983967
133	Pos5_HYD	0.00130982		207	0		163	0		83	0.00156078		51	0.00414407		99	8.28217e-05		166	0
134	Pos156_VOL	0.00127612		76	0.00107673		219	0		158	1.32815e-05		137	7.25549e-05		33	0.00693771		148	3.4907e-07
135	Pos94_VOL	0.00126946		224	0		204	0		95	0.000910602		45	0.00464331		29	0.00896671		111	0.000217708
136	Pos183_ASA	0.00124644		171	0		175	0		74	0.00180136		35	0.00616155		115	2.90551e-05		135	4.94446e-05
137	Pos203_HYD	0.00121801		33	0.00827275		166	0		184	0		87	0.000922442		48	0.00286471		117	0.000161145
138	Pos19_VOL	0.00121542		107	0.000257759		56	0.00114821		34	0.00551019		204	0		24	0.0121704		177	0
139	Pos16_VOL	0.00117397		201	0		167	0		154	3.38294e-05		206	0		19	0.0152671		176	0
140	Pos74_ASA	0.00113762		73	0.00140003		112	4.03429e-05		87	0.00132908		123	0.00013414		82	0.000259292		112	0.000189797
141	Pos162_ASA	0.00113499		113	0.00018303		23	0.00681127		41	0.00470175		40	0.00541145		226	0		119	0.000129658
142	Pos16_POL	0.00111442		202	0		66	0.000694208		67	0.00245519		8	0.0281972		176	0		109	0.000222924
143	Pos7_VOL	0.00111401		108	0.000252588		129	1.03115e-05		96	0.000898576		209	0		172	0		24	0.00753826
144	Pos108_POL	0.00110831		51	0.00389818		146	6.50145e-08		37	0.00502727		224	0		220	0		34	0.00582959
145	Pos116_VOL	0.00108057		55	0.00328724		199	0		160	8.79721e-06		80	0.00108146		66	0.00105041		74	0.000948455
146	Pos104_HYD	0.0010364		118	0.000150962		111	4.1326e-05		199	0		226	0		213	0		22	0.00928824
147	Pos194_HYD	0.00101072		150	3.05757e-05		176	0		149	4.84129e-05		105	0.000286132		89	0.000187301		82	0.000754188
148	Pos7_ASA	0.000976312		204	0		14	0.0106997		150	4.69448e-05		79	0.00111799		144	1.3703e-07		168	0
149	Pos111_VOL	0.000947437		122	0.000144194		192	0		212	0		54	0.00388241		189	0		105	0.000258542
150	Pos169_VOL	0.0009469		178	0		102	6.4825e-05		229	0		184	0		55	0.00185535		33	0.00587086
151	Pos118_HYD	0.000944036		161	4.48634e-06		126	1.74257e-05		133	0.000110569		113	0.000215116		107	4.19427e-05		55	0.00184638
152	Pos170_ASA	0.000932927		179	0		37	0.00336201		228	0		140	6.17103e-05		32	0.00715835		123	0.000107862
153	Pos8_POL	0.000917383		128	0.000122394		121	2.2595e-05		185	0		208	0		116	2.62062e-05		144	2.63522e-06
154	Pos18_ASA	0.000916415		80	0.000935356		168	0		45	0.00451134		205	0		179	0		120	0.000129108
155	Pos77_ASA	0.000916199		159	7.91812e-06		42	0.00284468		102	0.000649533		155	7.72178e-06		238	0		183	0
156	Pos119_VOL	0.000825688		146	4.31791e-05		144	3.32996e-07		142	7.33365e-05		132	7.84456e-05		25	0.0119611		27	0.00712252
157	Pos120_VOL	0.000821438		94	0.000533633		235	0		111	0.000534562		133	7.79655e-05		197	0		83	0.000704144
158	Pos48_ASA	0.00079996		57	0.00310544		58	0.00106745		43	0.00464705		148	1.86433e-05		39	0.00408087		71	0.000998718
159	Pos91_ASA	0.000755486		228	0		209	0		129	0.000168859		236	0		73	0.000634165		126	8.08003e-05
160	Pos184_HYD	0.000723385		169	0		48	0.00178367		166	9.75716e-08		86	0.000930729		75	0.000614337		159	0
161	Pos93_POL	0.000720562		225	0		65	0.000722384		79	0.00164438		233	0		200	0		200	0
162	Pos68_POL	0.000706431		22	0.0138955		92	0.00010541		73	0.00188776		194	0		103	5.82381e-05		186	0
163	Pos4_VOL	0.000696037		208	0		156	0		182	0		131	7.97361e-05		52	0.00233411		87	0.000516015
164	Pos165_ASA	0.000690857		157	1.05333e-05		45	0.00236076		232	0		89	0.000651641		122	1.47869e-05		36	0.00522124
165	Pos58_ASA	0.000689631		188	0		122	2.2362e-05		94	0.000955627		27	0.00989794		77	0.000454319		53	0.00205802
166	Pos90_CHA	0.000679095		230	0		97	8.03431e-05		201	0		238	0		195	0		204	0
167	Pos174_POL	0.000671682		60	0.00287576		21	0.00722365		224	0		177	0		135	1.60889e-06		100	0.000309259
168	Pos185_ASA	0.000656042		119	0.000150523		170	0		157	1.77333e-05		50	0.00418917		41	0.00398848		58	0.00170841
169	Pos107_VOL	0.000653592		222	0		194	0		138	9.38038e-05		82	0.00101749		84	0.000231237		191	0
170	Pos76_VOL	0.000643029		145	4.68913e-05		38	0.00333868		60	0.00293111		189	0		96	0.000113855		205	0
171	Pos164_HYD	0.000634848		115	0.000179345		54	0.00121846		118	0.000390516		68	0.0018525		36	0.00502571		216	0
172	Pos36_HYD	0.000608259		34	0.00778346		55	0.00120761		179	0		199	0		157	0		228	0
173	Pos70_POL	0.000601847		88	0.000686567		234	0		70	0.00225327		192	0		221	0		61	0.00127144
174	Pos120_POL	0.000593902		218	0		39	0.00323212		217	0		56	0.00352936		53	0.00205303		81	0.000761128
175	Pos148_ASA	0.000589182		43	0.00539066		228	0		207	0		24	0.0121521		134	2.25027e-06		25	0.00743921
176	Pos117_ASA	0.000571305		48	0.00472083		212	0		89	0.00125417		101	0.000392882		120	1.76057e-05		64	0.00110195
177	Pos11_ASA	0.000546776		71	0.00172239		118	2.66889e-05		64	0.00256163		108	0.000248887		165	0		52	0.00218844
178	Pos193_VOL	0.000539599		165	0		160	0		97	0.000880768		31	0.00732363		173	0		60	0.00133104
179	Pos38_POL	0.000494494		137	6.84673e-05		174	0		177	0		94	0.000532579		28	0.0104308		232	0
180	Pos101_POL	0.000484164		62	0.00278978		200	0		49	0.00427701		230	0		93	0.000136071		142	8.58872e-06
181	Pos171_HYD	0.000476778		170	0		84	0.000218142		226	0		168	0		56	0.00174129		128	7.73564e-05
182	Pos100_ASA	0.000440861		123	0.000142644		108	4.38807e-05		146	5.86376e-05		231	0		208	0		197	0
183	Pos117_HYD	0.000434059		69	0.00188709		75	0.000458026		178	0		119	0.000149241		207	0		96	0.000349237
184	Pos20_POL	0.000433109		91	0.000592246		109	4.2362e-05		161	8.61039e-06		81	0.00106838		181	0		180	0
185	Pos169_ASA	0.000408493		139	6.64748e-05		49	0.00172757		230	0		49	0.00442578		63	0.00134846		155	0
186	Pos119_HYD	0.000397612		219	0		40	0.00288795		122	0.000331283		103	0.000312144		71	0.000680317		19	0.0107107
187	Pos34_POL	0.000383323		143	5.47574e-05		106	5.02111e-05		135	0.000103624		46	0.00460159		104	5.80564e-05		224	0
188	Pos12_ASA	0.00038144		95	0.000524408		63	0.000803299		86	0.00134003		116	0.000162389		51	0.00255039		173	0
189	Pos112_VOL	0.000377139		93	0.00055124		137	3.60321e-06		50	0.00414275		122	0.000141318		57	0.00174046		122	0.000118491
190	Pos208_ASA	0.000327918		74	0.00115694		104	6.20804e-05		126	0.000206396		169	0		167	0		106	0.000256896
191	Pos178_POL	0.000300089		111	0.000221639		68	0.00064014		196	0		145	4.29859e-05		156	0		75	0.000919625
192	Pos30_POL	0.000294568		194	0		127	1.38669e-05		69	0.00234938		112	0.000226779		184	0		184	0
193	Pos102_HYD	0.000294019		182	0		83	0.000246695		78	0.00166807		239	0		126	1.14081e-05		93	0.000415065
194	Pos118_ASA	0.000281067		29	0.00898295		110	4.17009e-05		137	0.000101712		149	1.43389e-05		202	0		238	0
195	Pos159_POL	0.000260287		87	0.00069777		140	2.13335e-06		112	0.000478371		147	2.81065e-05		111	3.26461e-05		220	0
196	Pos160_HYD	0.000248278		46	0.00514336		88	0.000188914		76	0.00178461		166	5.98513e-07		228	0		219	0
197	Pos113_HYD	0.000245565		79	0.000963558		103	6.28453e-05		62	0.00262957		138	7.09774e-05		35	0.00589961		189	0
198	Pos148_POL	0.000239909		133	9.30647e-05		229	0		131	0.000163173		134	7.74981e-05		214	0		230	0
199	Pos95_HYD	0.000167426		40	0.00638554		69	0.000612366		104	0.000595732		156	5.77604e-06		201	0		80	0.000777175
200	Pos105_CHA	0.000128997		140	6.59029e-05		195	0		208	0		225	0		65	0.00112941		192	0
201	Pos115_ASA	0.000128861		160	7.8149e-06		15	0.00919893		214	0		100	0.000413995		69	0.000790652		97	0.000333165
202	Pos85_HYD	0.000111027		109	0.000247277		134	4.89208e-06		107	0.00058168		114	0.000197413		54	0.00186152		99	0.000312745
203	Pos189_POL	0.000105658		151	2.88808e-05		86	0.00020149		193	0		178	0		44	0.00320071		124	8.95205e-05
204	Pos59_VOL	9.73723e-05		186	0		215	0		171	0		57	0.00339429		162	0		89	0.000486498
205	Pos116_ASA	9.54454e-05		125	0.000129773		89	0.000143143		114	0.000436724		92	0.000558759		95	0.000124069		213	0
206	Pos185_HYD	8.83232e-05		129	0.000110538		171	0		54	0.00385483		76	0.00123367		185	0		46	0.0032299
207	Pos97_VOL	7.13651e-05		77	0.0010079		96	8.10497e-05		44	0.00452544		164	1.24101e-06		206	0		198	0
208	Pos9_ASA	6.95583e-05		104	0.00038586		70	0.000591579		42	0.00469073		135	7.74446e-05		174	0		171	0
209	Pos77_HYD	6.59263e-05		144	5.01081e-05		189	0		238	0		55	0.00367		91	0.000152389		110	0.000218864
210	Pos33_POL	6.28422e-05		191	0		150	0		151	4.39793e-05		163	1.53163e-06		148	0		221	0
211	Pos129_VOL	6.22684e-05		90	0.000603066		43	0.00276237		210	0		139	6.95814e-05		10	0.0275119		231	0
212	Pos3_HYD	5.56803e-05		131	9.63968e-05		239	0		239	0		185	0		90	0.000186339		67	0.00104064
213	Pos71_VOL	5.42055e-05		28	0.00914734		115	3.34409e-05		116	0.000429386		73	0.00129132		80	0.00038258		48	0.00274326
214	Pos102_ASA	5.14162e-05		117	0.000157244		78	0.000363488		206	0		151	1.159e-05		140	9.29883e-07		95	0.000355448
215	Pos183_HYD	4.9197e-05		172	0		157	0		39	0.00495176		167	3.7549e-07		72	0.000654328		56	0.00179967
216	Pos62_HYD	4.85024e-05		184	0		133	5.25243e-06		169	0		196	0		147	0		102	0.00029505
217	Pos164_ASA	4.1657e-05		120	0.000146558		29	0.00455514		234	0		160	3.16447e-06		223	0		215	0
218	Pos39_VOL	3.55759e-05		189	0		213	0		159	1.0598e-05		136	7.52267e-05		64	0.00118401		234	0
219	Pos22_POL	3.38248e-05		199	0		173	0		190	0		203	0		119	1.92829e-05		69	0.00101738
220	Pos7_CHA	2.73588e-05		205	0		53	0.00128537		183	0		210	0		128	9.38563e-06		167	0
221	Pos189_HYD	2.56418e-05		138	6.76033e-05		71	0.000559618		82	0.00156199		175	0		38	0.00446692		118	0.000145047
222	Pos207_ASA	1.82218e-05		168	0		100	6.91274e-05		32	0.00648877		171	0		169	0		164	0
223	Pos59_ASA	1.61649e-05		187	0		52	0.00131957		172	0		109	0.000239323		109	3.39425e-05		134	5.4855e-05
224	Pos192_POL	1.22338e-05		164	0		101	6.54994e-05		92	0.00110199		176	0		37	0.00469884		98	0.000318071
225	Pos185_POL	1.04479e-05		81	0.000880841		113	3.53696e-05		163	2.98158e-06		179	0		163	0		149	1.63723e-07
226	Pos102_POL	9.40013e-06		61	0.00280074		197	0		143	7.22985e-05		228	0		209	0		116	0.00016208
227	Pos23_CHA	6.29722e-06		198	0		178	0		164	2.81692e-06		202	0		182	0		156	0
228	Pos181_POL	4.34451e-06		174	0		181	0		170	0		181	0		158	0		145	1.68559e-06
229	Pos75_HYD	2.03911e-06		236	0		211	0		106	0.000594478		91	0.000604495		62	0.00135363		203	0
230	Pos88_HYD	1.17956e-06		103	0.000412378		105	5.21092e-05		124	0.000289925		67	0.00232136		100	7.65974e-05		57	0.00177578
231	Pos9_CHA	9.88766e-07		203	0		165	0		186	0		207	0		58	0.00167545		161	0
232	Pos77_CHA	4.4026e-07		234	0		188	0		237	0		188	0		234	0		206	0
233	Pos180_POL	1.68244e-07		175	0		93	0.000104726		147	5.76766e-05		88	0.000654177		117	2.01719e-05		179	0
234	Pos171_CHA	0		180	0		138	3.34892e-06		227	0		182	0		81	0.000261028		151	0
235	Pos65_CHA	0		211	0		145	2.23013e-07		176	0		141	5.92537e-05		145	0		140	1.27388e-05
236	Pos190_CHA	0		167	0		164	0		191	0		165	9.53172e-07		180	0		170	0
237	Pos92_POL	0		227	0		208	0		203	0		235	0		198	0		202	0
238	Pos181_VOL	0		181	0		179	0		30	0.00668072		161	2.83568e-06		146	0		107	0.000255667
239	Pos86_POL	0		232	0		67	0.000669589		110	0.000553458		213	0		216	0		210	0
