# Supplementary material for: Deep evolutionary analysis reveals the design principles of fold A glycosyltransferases
Source: eLife journal article supplement (doi:10.7554/elife.54532), 2020-04-01
Supplement: supp [file elife-54532-supp-v1.zip › elife_poa_e54532_Supplementary_file_1.xlsx]

## Sheet: Sheet1
Supplementary file 1: The CAZy GT-A families included in the analysis. The "Alignment source" column includes the CDD alignment identifiers used to build the seed profiles for a given GT-A family. If a suitable CDD profile was not available, the seed profiles were built by manually selecting and aligning representative sequences.
GTA Fam	Alignment source
GT2	cd02511, cd02522, cd02525, cd02526, cd04184, cd04185, cd04187, cd04188, cd04190, cd04192, cd04195, cd04196, cd06420, cd06421, cd06427, cd06433, cd06434, cd06435, cd06437, cd06438, cd06439, cd06442, cd06913 and alignment of closest homologs of C. elegans bre3
GT6	cd02515
GT7	cd00899
GT8	cd02537, cd04194, cd06429, cd06430, cd06431, cd06914 and pfam01501
GT12	Alignment of selected CAZy sequences
GT13	cd02514
GT14	Alignment of selected CAZy sequences
GT15	pfam01793
GT16	pfam05060
GT17	Alignment of selected CAZy sequences
GT21	cd02520
GT24	cd06432
GT25	cog3306
GT27	cd02510
GT31	pfam01762, pfam02434, pfam04646 and alignment of CAZy sequences
GT32	Alignment of selected CAZy sequences
GT34	pln03182
GT40	Alignment of selected CAZy sequences
GT43	cd00218,pfam03360 and alignment of CAZy sequences
GT45	Alignment of selected CAZy sequences
GT49	pfam13896
GT54	pfam04666
GT55	pfam09488
GT60	pfam11397
GT62	Alignment of selected CAZy sequences
GT64	pfam09258
GT67	Alignment of selected CAZy sequences
GT75	Alignment of selected CAZy sequences
GT77	Alignment of selected CAZy sequences
GT78	Alignment of selected CAZy sequences
GT81	prk13915
GT82	pfam06306
GT84	cd04191
GT88	Alignment of selected CAZy sequences
