# Supplementary material for: Deep evolutionary analysis reveals the design principles of fold A glycosyltransferases
Source: eLife journal article supplement (doi:10.7554/elife.54532), 2020-04-01
Supplement: supp [file elife-54532-supp-v1.zip › elife_poa_e54532_Supplementary_file_2.xlsx]

## Sheet: Sheet1
Supplementary file 2: Mapping of the 231 aligned positions to representative crystal structures available for all GT-A fold families. The "Position Description" column includes the labels for conserved motifs and hypervariable regions for the aligned positions. GT family, PDB IDs and reference to PubMed IDs are indicated at the header columns.
Aligned Position	Position Description	GT2-Class1			GT2-CeS	GT2-DPs		GT2-RhamGlfT	GT6			GT7			GT8-LpsGlt				GT8-Glycogenin			GT13		GT14		GT15		GT16	GT24		GT27						GT31-Fringe	GT34	GT43			GT55		GT62	GT64	GT78	GT81
		2z87_A	1qgq_A	4fiy_A	4hg6_A	5mm0_A	5eke_A	6h21_A	4ayj_A	5c4b_A	5nrb_A	1o0r_A	2ae7_A	4lw6_A	3tzt_A	1ga8_A	4wmb_A	5gvv_A	1ll2_A	3t7o_A	4ueg_A	1foa_A	5ggi_A	2gam_A	6ej7_A	1s4p_A	5a07_A	5vcm_A	5h18_A	5n2j_A	1xhb_A	2d7i_A	2ffu_A	6e4q_A	6h0b_A	6iwr_D	2j0b_A	6bsv_A	1kws_A	1v84_A	2d0j_A	2wvl_A	2zu8_A	3zf8_A	1on6_A	2bo8_A	3ckq_A	3o3p_A	4y6u_A
		PMID:18771653	PMID:10350455	PMID:22707726	PMID:23222542	PMID:28743912	PMID:26729507	PMID:30464342	PMID:23230506	PMID:26374898	PMID:28960760	PMID:12051854	PMID:16157350	PMID:24052259	Cuff et.al., To be published	PMID:11175908	PMID:26414444	PMID:28246170	PMID:12051921	PMID:22160680	Fairhead et.al., To be published	PMID:11032794	PMID:27493216	PMID:16829524	PMID:29681470	PMID:14752117	PMID:26296208	PMID:29666272	PMID:28939828	PMID:28739903	PMID:15486088	PMID:16650853	PMID:16434399	PMID:30158631	PMID:30276263	PMID:30685086	PMID:16964258	PMID:29784804	PMID:11950836	PMID:14993226	PMID:16897771	PMID:20356840	PMID:19018103	PMID:24026536	PMID:12562774	PMID:15951819	PMID:18667419	PMID:21166895	PMID:26136334
1	HyPhoCore	I154	V6	V6	I144	V5	I7	-	-	T119	T132	I184	I180	L79	L5	A5	A5	A7	I3	-	V8	I110	V304	Y125	F330	-	I137	L120	S1196	S1204	V120	I149	V140	V213	V139	V211	I56	L153	V79	V88	A84	I57	V55	I119	-	V4	V52	-	V47
2	HyPhoCore	V155	I7	I7	L145	I6	V8	-	-	V120	V133	I185	I181	L80	L6	F6	F6	F8	V4	-	V9	L111	A305	S126	V331	V126	L138	V121	V1197	V1205	V121	I150	V141	I214	I140	V212	F57	V154	V80	V89	I85	V58	I56	L120	L69	V5	V53	V47	V48
3	HyPhoCore	I156	M8	M8	V146	I7	I9	I166	-	F121	F134	I186	I182	V81	L7	V7	V7	V9	F5	-	F10	V112	V306	I127	L332	T127	S139	V122	A1198	A1206	I122	I151	I142	I215	I141	I213	I58	T155	T81	T90	T86	V59	V57	T121	I70	F6	L54	L48	L49
4		P157	T9	P9	P147	P8	P10	P167	-	A122	A135	P187	P183	P82	T8	T8	T8	T10	A6	-	A11	I113	I307	V128	V333	L128	L140	Q123	S1199	S1207	V123	P152	T143	C216	A142	V214	A59	G156	P82	P91	P87	P60	P58	P122	M71	P7	P55	P49	P50
5		T158	S10	T10	S148	T9	M11	T168	T10	I123	V136	F188	F184	F83	L9	L9	L9	L11	A7	-	G12	A114	A308	V129	V334	V129	V141	V124	G1200	G1208	F124	F153	F144	F217	F143	F215	V60	S157	T83	T92	T88	T61	M59	M123	Q72	F8	A56	S50	A51
6		Y159	Y11	F11	Y149	Y10	Y12	F169	G11	K124	G137	R189	R185	R84	D10	T10	T10	A12	D8	-	D13	C115	G309	H130	H335	R130	R142	H125	H1201	H1209	H125	H154	H145	H218	Y144	H216	K61	A158	Y84	Y93	Y89	R62	K60	Q124	T73	K9	L57	R51	L52
7		N160	N12	N12	N150	N11	N13	N170	K12	K125	R138	N190	N186	D85	N12	T11	T11	T13	N10	-	A15	D116	N310	H131	G336	N131	N143	N126	L1202	L1210	N126	N155	N146	N219	N145	N217	T62	C162	A85	S94	S90	N63	N61	-	Y74	H10	D58	N52	N53
8		R161	K13	N13	E151	E12	E14	R171	Y13	Y126	Y139	R191	R187	R86	Y13	N12	N12	N14	Y11	-	Y16	R117	R311	K132	R337	K132	S144	R127	Y1203	Y1211	E127	E156	E147	E220	E146	E218	T63	E163	R86	R95	R91	E64	E62	-	N75	E11	E59	V53	E54
9		A162	S14	G14	P152	R13	E15	P172	D14	V127	I140	Q192	Q188	F87	I14	D13	D13	D15	A12	-	I17	S118	P312	I133	A338	E133	D145	P128	E1204	E1212	A128	G157	A148	A221	A147	G219	W64	N164	L87	P96	P92	R65	K63	-	R76	H12	E60	A54	E55
10		-	-	-	A153	-	-	-	-	-	-	-	-	-	-	-	-	-	-	-	-	-	-	-	-	L134	L146	-	-	-	W129	W158	R149	W222	W148	W220	-	P165	V88	V97	V93	-	-	-	-	-	-	-	-
11		K163	D15	E15	D154	E14	D16	A173	I15	A128	E141	E193	E189	E88	P15	A14	A14	I16	A13	-	R18	-	N313	E134	S339	K135	E147	E129	R1205	R1213	S130	S159	S150	T223	S149	S221	A65	D168	K90	K99	K95	L66	L64	T125	T77	P13	D61	D55	A56
12		I164	Y16	K16	M155	N15	N17	-	F16	F129	Y143	H194	H190	E89	Q16	Y15	Y15	Y17	Y14	-	Q19	T119	Y314	M135	Q341	G136	D148	Y130	M1206	M1214	T131	S160	A151	V224	T150	T222	F66	Y170	E92	E101	E97	K67	H65	F126	D78	E14	T62	T56	T57
13	HyPhoCore	L165	V17	L17	L156	L16	L18	-	W17	L130	L144	L195	L191	L90	M17	A16	A16	C18	L15	A117	I20	V120	L315	L136	L342	L137	I149	L131	L1207	L1215	L132	L161	L152	L225	L151	L223	H67	L171	L93	L102	L98	L68	L66	H127	L79	V15	I63	V57	I58
14		A166	A18	H18	S157	E17	E19	-	K18	K131	E145	K196	K192	L91	K18	K17	K17	Q19	C16	R118	E21	R121	Y316	D137	Q343	L138	I150	R132	N1208	N1216	L133	L162	L153	L226	L152	M224	R68	L172	V94	T103	T99	L69	V67	Q128	L80	L16	G64	G58	E59
15		I167	K19	R19	V158	E18	H20	D174	D19	L132	E146	Y197	Y193	Q92	V19	G18	G18	G20	V17	V119	T22	R122	R317	R138	R344	S139	S151	L133	I1209	I1217	R134	R163	R154	R227	R153	R225	S69	K173	R95	R104	R100	E70	D68	Q129	L81	L17	S65	G59	S60
16		T168	S20	T20	T159	L19	L21	C175	F20	F133	F147	W198	W194	F93	L20	A19	A19	A21	A18	A120	A23	C123	M318	L139	M345	S140	S152	L134	M1210	M1218	T135	T164	T155	T228	T154	T226	R70	S174	L96	M105	L101	G71	G69	Y130	R82	H18	V66	I60	V61
17	HyPhoCore	L169	I21	I21	L160	I23	L25	V176	Y21	L134	L148	L202	L198	M97	M21	L20	L20	L22	A19	L121	M24	L124	L319	L140	F346	I141	I153	L135	M1211	M1219	V136	V165	V156	V229	I155	V227	L71	I175	S97	A106	A102	V72	V70	W131	L83	N19	I67	I61	I62
18		A170	S22	S22	A161	D24	L26	N177	L22	E135	T149	H203	H199	T98	T22	V21	V21	V23	K20	S122	K25	D125	R320	R141	K347	K142	Q154	D136	V1212	A1220	H137	H166	V157	H230	H156	H228	D72	K176	Q98	N107	N103	L73	L71	D132	L84	V20	D68	D62	D63
19		C171	S23	S23	A162	N25	E27	A178	S23	T136	S150	P204	P200	A99	S23	L22	L22	L24	S21	S123	S26	K126	S321	A142	A348	Y143	Q155	S137	S1213	S1221	S138	S167	S158	S231	S157	S229	L73	N177	T99	T108	T104	S74	K72	N133	N85	R21	S69	E63	S64
20	HyPhoCore	L172	I24	V24	A163	A26	V28	L179	A24	A137	A151	I205	V201	F100	I24	G23	G23	G25	V22	L124	L27	L127	L322	I143	I349	V144	L156	L138	V1214	V1222	V139	V168	V159	V232	V158	V230	L74	K178	L100	L109	F105	G75	A73	L134	H86	V22	I70	I64	I65
21		C173	L25	L25	K164	L27	L29	R180	E25	E138	N152	L206	L202	L101	Y25	S24	S24	Q26	E23	L125	C28	L128	L323	Y144	Y350	E145	E157	R139	M1215	M1223	I140	L169	L160	L233	L159	I231	L75	I179	S101	L110	R106	I76	I74	L135	Y87	A23	S71	H65	S66
22		N174	S26	N26	N165	Q28	T30	E181	R26	K139	K153	Q207	Q203	K102	I26	S25	S25	S27	A24	R126	R29	H129	S324	M145	H351	N146	E158	K140	K1216	H1224	N141	N170	K161	D234	E160	K232	D76	D180	L102	H111	Q107	P77	P75	Q136	Q88	A24	P72	A66	P67
23		Q175	Q27	Q27	M166	G29	P31	L182	Y27	H140	H154	R208	R204	R103	N27	L26	L26	L28	A25	L127	H30	Y130	A325	P146	K352	K147	E159	A141	H1217	H1225	R142	R171	K162	R235	T161	R233	T77	Y181	V103	V112	V108	H78	H76	L137	A89	A25	L73	L67	L68
24		T177	T28	T28	I167	L30	L32	T183	F28	F141	F155	Q209	Q205	Q104	N28	K27	K27	R29	H26	A128	N31	R131	Q326	-	-	I148	Y160	Q142	T1218	T1226	S143	S172	S163	S236	S162	T234	W78	C182	P104	P113	A109	E79	K77	N138	V90	H26	V74	N68	V69
25		I178	F29	S31	Y168	N31	K33	A184	M29	M142	M156	Q210	Q206	G105	P29	Q28	Q28	R30	P27	K129	S32	P132	-	-	-	N149	N161	G143	K1219	N1227	P144	P173	P164	P237	P163	P235	V79	R183	-	-	-	-	-	Y139	P91	P27	-	E69	-
26		Y179	S30	T32	P169	-	I34	D185	Q30	V143	V157	L211	L207	V106	G30	H29	H29	H31	D28	H133	H33	S133	G327	Q147	D353	K150	K162	I144	H1220	H1228	R145	P174	P165	E238	A164	R236	S80	I184	-	-	-	-	-	P140	S92	R28	D75	R70	D70
27		D180	D31	D33	A170	-	T35	P186	D31	G144	G158	D212	D208	A107	R31	R30	R30	R32	T29	E134	-	A134	V328	N148	H354	K151	N163	D145	S1221	T1229	H146	E175	H166	H239	V165	K237	R81	H185	R105	N114	Q110	A80	C78	R141	L93	V29	G76	P72	G71
28		-	-	-	R171	-	-	L187	-	-	-	-	-	-	I32	T31	T31	L33	E30	V135	-	E135	S329	F149	F355	F152	F164	N146	-	-	M147	L176	L167	L240	L166	Y238	I82	G186	-	-	-	-	-	E142	-	-	L77	L73	L72
29		-	-	-	L172	-	-	V188	-	-	-	-	-	-	-	S32	T32	T34	-	-	-	L136	P330	-	-	P153	G165	V147	-	-	-	-	-	-	-	-	R83	-	-	-	-	-	-	L143	-	-	V78	I74	V73
30		Y181	F32	Y34	R173	Y32	Y36	G193	Q32	H145	H159	Y213	Y209	H108	F33	R33	R33	R35	I31	L136	L34	F137	Q331	Y150	Y356	Y154	Y166	L148	V1222	V1230	I148	V177	I168	I241	L167	L239	Q84	I187	L106	L115	L111	L81	P79	L146	H94	H30	D79	D75	D74
31		E182	E33	E35	T174	E33	E37	A194	S33	R146	P160	G214	G210	H109	D34	L35	L35	L37	R32	N137	K35	P138	M332	C151	Y357	P155	P167	-	K1223	K1231	E150	E179	E170	K243	E169	E241	Q85	E188	H107	H116	H112	I82	I80	G147	K95	E31	E80	Q76	E75
32	HyPhoCore	V183	L34	L36	V175	I34	I38	V195	F34	V147	V161	I215	I211	I110	V35	A36	V36	V38	F33	L138	I36	I139	I333	I152	I358	W156	Y168	V149	F1224	F1232	I151	I180	I171	I244	I170	I242	T86	I189	W108	W117	W113	L83	I81	F148	V96	V32	L81	I77	L76
33	HyPhoCore	I184	F35	I37	V176	V35	I39	I196	I35	H148	I162	Y216	Y212	F111	Y36	V37	V37	V39	H34	H139	Y37	I140	T334	-	-	V157	T169	I150	W1225	W1233	V152	V181	I172	I245	I171	V243	F87	F190	L109	L118	I114	V84	I82	I149	I97	L33	I82	L78	I77
34	HyPhoCore	V185	I36	I38	L177	V36	C40	V197	V40	V151	I165	V217	V213	V112	L37	L38	L38	L40	V35	F140	L38	V141	V335	H153	H359	F158	F170	F151	F1226	F1234	L153	L182	L173	L246	L172	L244	I88	Y191	L110	V119	L115	A85	V83	T150	V98	C34	V83	V79	V78
35		A186	M37	I39	C178	V37	V41	P198	F41	F152	M166	I218	I214	L113	I38	T39	A39	I41	L36	V141	L39	S142	F336	V154	V360	L159	L171	S152	I1227	I1235	V154	V183	V174	V247	V173	I245	F89	N192	V111	V120	V116	S86	S84	P151	V99	I35	L84	V80	L79
36		D187	D38	D40	D179	D38	N42	D199	T42	T153	V167	N219	N215	N114	H39	T40	T40	T42	D37	S142	N40	Q143	I337	D155	D361	N160	N172	H153	E1228	E1236	D155	D184	D175	D248	D174	D246	T90	-	E112	E121	E117	N87	N85	R152	W100	G36	D85	D81	D80
37		D188	D39	D41	D180	D39	D43	Q200	D43	D154	D168	Q220	Q216	Q115	S40	P41	P41	P43	A38	E143	Q41	D144	D338	R156	K362	D161	D173	D154	Q1229	Q1237	D156	D185	D176	D249	D175	D247	D91	-	D113	D122	D118	S88	S86	T153	N101	Y37	S86	A82	S81
38		G189	N40	H42	G181	D40	G44	G201	S44	Q155	D169	A221	A217	V116	R41	Q42	Q42	Q44	G39	E144	D42	C145	G339	K157	R363	E162	E174	F155	F1230	F1238	A157	F186	Y177	Y250	L176	F248	S92	-	A114	A123	A119	S89	K87	A154	N102	-	G87	D83	G82
39		S190	S41	S43	G182	S41	S45	E202	P45	P156	V170	-	-	-	I42	V43	V43	V45	I40	A145	I43	G146	Y340	A158	S364	P163	E175	W156	L1231	L1239	S158	S187	S178	S251	S177	S249	P93	-	E115	P124	A120	-	R88	T155	E105	E38	S88	S84	S83
40		K191	N42	N44	D191	P42	K46	R203	K46	A157	S171	-	-	-	S43	S44	S44	S46	S41	S146	P44	H147	Y341	E159	Y366	F164	F176	S157	S1232	S1240	E159	D188	N179	D252	D178	N250	D94	-	T118	T127	S123	-	E89	G156	K106	R39	T89	E85	T84
41		E192	E43	D45	P192	D43	D47	K204	L47	A158	R172	-	-	-	E44	D45	D45	D47	E42	R147	Q45	E148	E342	E160	L367	T165	T177	T158	P1233	P1241	R160	R189	D180	M253	R179	K251	E95	-	P119	P128	E124	-	G90	D157	G107	D40	D90	D86	D85
42		N193	E44	N46	E193	R44	K48	D210	Y48	V159	M173	-	-	-	D45	T46	S46	L48	A43	E148	E46	E149	E343	S161	H368	E166	D178	E159	S1234	S1242	D161	E190	P181	P254	V180	E252	R96	-	L120	L129	L125	P90	P91	L158	P108	Q41	D91	G87	D86
43		I194	T45	T49	L194	T45	T49	F211	D49	P160	P174	-	-	-	K46	M47	M47	L49	N44	A150	W47	T150	P344	F162	R369	E167	E179	I160	F1235	F1243	F162	H191	E182	H255	Y181	H253	-	-	V121	T130	V126	D91	N92	A159	E109	T42	T92	T88	T87
44		E195	L46	L50	A195	W46	L50	P212	E50	R161	L175	-	-	-	L47	R48	R48	R50	R45	K151	F48	A151	M345	L163	Q370	F168	F180	N161	K1236	K1244	L163	L192	D183	L256	L182	L254	-	-	S122	A131	S127	R92	R93	L160	E110	Y43	E93	A89	E88
45		E196	N47	N51	Q196	E47	K51	A213	E51	V162	I176	-	-	-	K48	K49	K49	R51	A46	A152	S49	Q152	D346	A164	-	K169	K181	Q162	K1237	D1245	K164	K193	G184	K257	K183	K255	-	-	G123	R132	R128	F93	Y94	K161	L111	E44	I94	G90	I89
46		I197	V48	V52	K197	K48	Q52	A214	N52	T163	E177	-	-	-	D49	A50	V50	I52	A47	L153	Q50	V153	V347	A165	-	E170	D182	L163	F1238	F1246	R165	K194	A185	R258	T184	E256	-	-	L124	L133	F129	Q94	K95	K162	W112	A45	R95	V91	R90
47		V198	I49	I53	A198	A49	L53	A215	N53	L164	L178	-	-	-	L50	L51	L51	L53	V48	L154	I51	I154	V348	V166	V371	A171	G183	I164	L1239	I1247	P166	P195	L186	Q259	Q185	K257	L97	-	L125	L134	L130	E96	E97	L163	-	V46	A96	A92	A91
48		R199	R50	K54	Q199	Q50	I54	A216	K54	G165	G179	-	-	-	G51	E52	E52	S54	A49	R155	R52	A155	A349	Q167	L372	V172	I184	A165	P1240	P1248	L167	L196	L187	L260	L186	L258	Q98	-	A126	R135	A131	R97	V98	E164	N113	E47	V97	A93	I92
49		E200	P51	K55	E200	E51	D55	R217	H55	T166	P180	-	-	-	E52	I53	T53	K55	A50	E156	I53	S156	L350	G168	Q373	T173	K185	G166	H1241	H1249	E168	E197	-	E261	E187	D259	E99	-	A127	D136	R132	D98	D99	N165	S114	R48	A98	S94	A93
50		F201	F52	Y56	L208	L52	C56	L218	I56	G167	L181	-	-	-	D53	V54	V54	V56	N51	L157	Y54	Y157	F351	I169	V374	K174	S186	V167	L1242	M1250	S169	D198	-	D262	T188	E260	R100	-	S128	T137	A133	L99	L100	A166	L115	A49	A99	H95	S94
51		E202	N54	K57	C209	S53	Y57	G219	H57	R168	R182	-	-	-	Y59	F55	F55	F57	G57	C166	G60	G158	G352	-	-	A175	I187	N168	-	-	V171	-	-	F264	I190	I262	L101	-	G129	G138	G134	L106	L107	D173	G116	A56	-	-	-
52		S203	D55	G58	R210	S54	Q58	S220	R58	Q169	S183	-	-	-	T60	D56	D56	D58	N58	K167	D61	S159	-	A170	S375	V176	L188	F169	-	-	K172	M200	-	A265	S191	K263	G102	-	L130	L139	L135	T107	T108	Q177	P117	T57	-	-	-
53		L204	N56	L59	E211	K55	S59	R221	I59	L170	F184	-	-	-	L61	E57	E57	E59	I59	V168	L62	A160	-	S171	R376	S178	K190	C170	A1243	A1251	L174	L202	K189	Y267	-	W265	P103	-	L131	N140	P136	E108	H109	R178	H118	G58	-	-	-
54		L205	R57	V60	L212	Y56	N60	L222	K60	S171	K185	-	-	-	Y62	I59	I59	I61	R60	I169	I63	V161	L353	F173	Y378	V180	V194	V172	K1244	A1252	V176	P204	E191	P268	D194	G267	H104	-	F132	Y141	S137	R109	S110	S180	I120	T59	-	-	-
55		N206	V58	R61	G213	P57	R61	S223	-	V172	V186	-	-	-	P63	T60	M60	E62	F61	F170	D64	T162	R354	D174	S379	K181	E195	L173	E1245	E1253	P177	S205	K192	K269	R195	L268	-	-	T133	T142	T138	P110	K111	K181	P121	P60	G100	G96	G95
56		I207	R59	F62	V214	-	Q62	I224	-	L173	F187	-	-	-	I64	V61	V61	V63	I62	H171	C65	H163	G355	N175	N380	F182	F196	Q174	Y1246	Y1254	V178	V206	V193	V270	V196	V269	L105	-	H134	H143	H139	A111	I112	I182	V122	V61	A101	A97	A96
57		-	F60	K63	V215	V58	I63	-	-	E174	K188	-	-	-	-	-	-	-	-	-	-	I164	I356	V176	V381	G183	G197	V175	-	-	H179	R207	R194	Q271	R197	K270	V106	-	L135	L144	L140	L112	I113	T183	I123	S62	R102	E98	R97
58		V210	Y61	Q64	Y216	K59	K64	H225	-	V175	I189	-	-	-	R65	D62	D62	N64	D63	D172	K66	R165	Q357	F177	R382	I184	T198	F176	G1247	G1255	V180	I208	V195	I272	L198	V271	V107	-	L138	E147	P143	I113	M114	I184	F124	V63	V103	V99	V98
59		R211	Q62	L65	S217	V60	I65	D226	Q61	R176	K190	-	-	-	A66	I63	V63	L65	V64	V173	L67	Q166	H358	V178	V383	L185	I199	F177	F1248	F1256	I181	L209	L196	I273	I199	F272	T108	-	T139	T148	T144	F114	I115	L185	K125	R64	V104	Y100	V99
60		Q212	S63	K66	T218	I61	V66	Q227	K62	A177	P191	-	-	-	T67	L64	L64	I66	N65	A174	I68	P167	T359	A179	T384	P186	G200	P178	S1249	K1257	R182	R210	R197	R274	R200	R273	Q109	M193	P140	P149	P145	H115	H116	R186	P126	L65	S105	S101	S100
61		K213	D64	K67	R219	R62	N67	P228	N63	Y178	E192	G222	G218	D117	D68	D65	D65	D67	P66	V175	G69	D168	P360	S180	P385	K187	P201	F179	Y1250	Y1258	M183	T211	N198	G275	T201	N274	C110	A194	K141	R150	R146	Q116	Q117	Q187	Q127	Q66	R106	E102	R101
62	HV1	D214	I65	N68	E220	R63	L68	N229	L64	K179	K193	E223	D219	R118	D69	S66	S66	S68	E67	L176	S70	L169	I361	Q181	W386	E188	D202	S180	E1251	E1259	E184	K212	D199	Q276	N202	E275	S111	L195	A142	N151	R147	K117	K118	N188	T128	E67	E107	N103	E102
63		Y215	-	-	R221	T64	S69	-	G65	R180	R194	S224	T220	F119	L70	G67	G67	A69	D68	T177	Q71	S170	S362	L182	R387	H189	N203	I181	M1252	M1260	Q185	K213	R200	K277	K203	R276	A112	L196	Q143	Y152	Y148	D118	D119	S189	-	R68	Q108	E104	Q103
64		G216	-	-	N222	K65	R70	-	W66	W181	W195	M225	I221	R120	F71	D68	D68	D70	F69	D178	F72	N171	I363	E183	M388	W190	W204	Q182	V1253	V1261	R186	R214	R201	R278	R204	R277	E113	D197	R144	K153	K149	P119	P120	Q190	-	L69	A109	L105	A104
65		Y217	S66	S69	H224	K67	F72	L230	P67	Q182	Q196	F226	F222	F121	P81	L80	L80	L82	S80	S200	N84	Y185	A366	T191	S396	M223	M238	S228	R1269	R1277	S187	E215	E202	E279	E205	E278	P117	M200	P155	P164	P154	S142	S143	A211	A129	P74	P117	H113	P112
66		Q218	G67	G70	A225	G68	G73	G231	D68	D183	D197	N227	N223	N122	K82	G81	G81	G83	I81	D201	H85	K186	R367	R192	L397	C224	C239	Q229	E1270	E1278	G188	G216	G203	G280	G206	G279	A118	A201	R156	R165	R155	G143	G144	A212	N130	G75	G118	G114	G113
67		L219	V68	-	K226	L69	K74	G232	N69	V184	I198	R228	R224	R123	E83	V82	V82	L84	T82	S202	M86	I187	V368	V193	L398	R225	R240	T230	I1271	I1279	L189	L217	L204	L281	L207	L280	L119	G202	G157	G166	A156	K144	K145	M213	K131	K76	K119	K115	K114
68		C220	Y77	-	A227	S70	E75	S233	T70	S185	S199	A229	A225	A124	M84	T83	T83	T85	T83	I203	T87	A188	S369	K194	S399	Y226	F241	K231	W1272	W1280	I190	I218	M205	I282	V208	I281	S120	F203	V158	T167	T157	A145	G146	A214	M132	G77	G120	G116	G115
69		A221	A78	N71	G228	S71	I76	G234	L71	M186	M200	K230	K226	S125	Y85	L84	L84	L86	Y84	F204	F88	R189	Q370	A195	T400	Q227	Y242	H232	G1273	G1281	R191	R219	R206	R283	R209	Q282	C121	W204	E159	M168	E158	E146	E147	L215	R133	D78	E121	D117	E116
70		V222	A79	A72	N229	A72	A77	G235	K72	R187	M201	L231	L227	L126	Y86	T85	T85	T87	A85	F205	A89	H190	H371	D196	Y401	S228	S243	H233	Y1274	Y1282	A192	T220	S207	A284	A210	A283	K122	A205	Q160	Q169	Q159	G147	G148	A216	N134	G79	A122	A118	A117
71		R223	I81	R76	M230	V73	L78	Y236	R73	R188	R202	L232	L228	I127	R87	K86	K86	K88	R86	S207	R90	Y191	Y372	L197	L402	G229	K244	W234	K1275	K1283	R193	R221	R208	R285	R211	R284	M123	K206	R161	R170	R160	M148	M149	R217	R135	M80	L123	M119	L118
72		N224	N82	N77	S231	I74	S79	S237	F74	M189	M203	N233	N229	N128	L88	L87	L87	L89	L87	V208	Y91	R192	K373	N198	Q403	F230	E245	W235	I1276	I1284	L194	M222	V209	I286	L212	S285	A124	L207	N162	N171	N161	I149	L150	N218	L136	N81	W124	W120	W119
73		L225	Q83	T78	A232	R75	A80	R238	H75	E190	K204	V234	V230	V129	L89	H88	H88	H90	K88	A209	F92	W193	A374	C199	S404	F231	F246	W236	L1277	L1285	K195	L223	R210	L287	I213	I286	A125	P208	K163	L172	A162	L150	V151	E219	Q137	T82	R125	R121	R120
74		G226	A84	G79	A233	G76	G81	V239	I76	M191	T205	G235	G231	G130	A90	C89	C89	C91	L89	M210	I93	A194	S375	M200	M405	W232	Y247	K237	F1278	F1286	G196	G224	G211	G288	G214	G287	E126	L209	A164	A173	G163	A151	G152	L220	V138	A83	S126	A122	S121
75		L227	I85	L80	L234	F77	I82	M240	F77	I192	I206	F236	F232	F131	G91	W90	W90	W92	G90	H211	P94	L195	L376	K201	R406	R233	H248	L238	L1279	L1287	A197	A225	A212	A289	A215	A288	F127	I210	L165	L174	L164	L152	L153	L221	F139	L84	L127	L123	L122
76		R228	E86	K81	E235	K78	D83	Y241	-	S193	G207	K237	Q233	Q132	E92	S91	S91	T93	E91	Q212	D95	G196	T377	D202	D407	H234	H249	H239	D1280	D1288	A198	S226	D213	N290	T216	Q289	D128	R211	D166	R175	A165	V153	L154	F222	P140	R85	A128	S124	A123
77		A229	M87	M82	R236	E79	Y84	E242	L78	D194	E208	E238	E234	F133	F93	L92	L92	L94	Y92	I213	F96	Q197	A378	L203	L408	E235	P250	F240	V1281	V1289	V199	V227	A214	H291	F217	K290	A129	K212	W167	W176	W166	F154	L155	S223	E141	Y86	A129	V125	A124
78		A230	A88	S83	L237	A80	A85	A243	R79	F195	H209	A239	A235	A134	L94	T93	T93	T95	I93	M214	V97	I198	T379	Y204	L409	L236	L251	V241	L1282	L1290	S200	A228	A215	A292	A218	A291	F130	L213	L168	L177	L167	A155	A156	T224	V142	F87	S130	T126	T125
79		-	-	-	-	-	-	L244	I80	C196	I210	L240	L236	S135	P95	-	-	-	A94	P215	-	F199	F380	R205	E410	L237	L252	W242	F1283	F1291	-	-	-	-	-	-	L131	L214	R169	R178	R168	A156	K157	I225	-	L88	-	-	-
80		-	-	-	-	-	-	K245	K81	E197	V211	K241	K237	D136	-	-	-	-	-	K216	-	H200	N381	M206	M411	E238	S253	E243	P1284	P1292	-	-	-	-	-	-	V132	L215	G170	E179	Q169	L157	A158	G226	-	E89	-	-	-
81		-	-	-	-	-	-	T247	E82	R198	A212	D242	D238	V137	-	-	-	-	-	-	-	N201	L382	N207	T412	-	-	R244	L1285	L1293	-	-	-	-	-	-	S133	S216	R171	T180	R170	S158	I159	P227	-	E90	-	-	-
82		K231	E89	K84	K238	S81	Q86	D248	E87	E203	E217	D244	D240	-	E96	Q94	Q94	H96	D95	E217	T98	N203	E385	N209	P415	E239	K254	Y251	S1286	S1294	R201	T229	Q216	K293	T219	K292	G134	E219	T186	Q187	Q177	G159	G160	H228	E143	Q92	R131	R127	S126
83		Y232	G90	A85	G239	G82	G87	C249	T88	V204	V218	Y245	Y241	-	L98	Y95	Y95	Y97	C96	I218	E99	Y204	A386	W210	W416	Y240	Y255	A252	L1287	L1295	G202	G230	A217	S294	G220	G294	L135	I220	Q187	P188	P178	R160	A161	T229	T144	W93	G132	G128	G127
84		N233	E91	E86	E240	D83	N88	Q250	D89	D205	D219	N246	T242	D139	G99	S96	S96	S98	D97	P219	D100	P205	K387	K211	D417	D241	K256	G253	D1288	D1296	Q203	D231	K218	P295	D221	Q295	R136	E221	G188	G189	G179	R161	E162	S230	N145	E94	D133	D129	D128
85		Y234	Y92	Y87	L241	V84	A89	Q251	Y90	Y206	F220	C247	C243	Y140	E100	K97	K97	K99	K98	R220	K101	A206	F388	Y212	F418	W242	Y257	L254	K1289	K1297	V204	V232	V219	V296	V222	V296	W137	F222	V189	V190	V180	Y162	Y163	W231	A146	R95	I134	L130	I129
86	HyPhoCore	V235	I93	V88	V242	F85	V90	I252	L91	L207	L221	F248	F244	I141	I101	C98	C98	C100	V99	I221	V102	A207	A389	L213	F419	Y243	V258	I255	V1290	V1298	I205	I233	L220	L297	L223	L297	F138	L223	V190	V191	L181	V163	V164	V232	V147	I96	V135	V131	V130
87	HyPhoCore	A236	T94	F89	V243	V86	I91	L253	F92	V208	F222	V249	V245	A142	L102	V99	V99	V101	L100	I222	L103	V208	V390	I214	I420	W244	W259	L256	I1291	I1299	T206	T234	T221	T298	T224	I298	C139	W224	Y191	Y192	F182	G164	G165	L233	L148	H97	V136	L132	V131
88		I237	Y95	F90	V244	V87	P92	F254	F93	C209	C223	F250	F246	M143	Y103	F100	F100	F102	Y101	Q223	Y104	V209	V391	N215	N421	R245	R260	F257	F1292	F1300	F207	F235	F222	Y299	F225	Y299	H140	W225	F192	F193	F183	F165	F166	W234	M149	F98	F137	Y133	F132
89		L238	A96	L91	F245	M88	I93	M255	F94	V210	M224	S251	S247	H144	L104	M101	M101	L103	L102	L224	L105	V210	L392	L216	L422	V246	L261	L258	V1293	V1301	L208	L236	L223	L300	L226	L300	V141	M226	A193	A194	A184	I166	V167	L235	V150	Y99	V138	I134	I133
90	DXD motif	D239	T97	D92	D246	D89	D94	D256	N95	D211	D225	D252	D248	D145	D105	D102	D102	D104	D103	D225	D106	E211	E393	C217	S423	E247	E262	E259	D1294	D1302	D209	D237	D224	D301	D227	D301	D142	D227	D194	D195	D185	D167	D168	N236	D151	D100	D139	D135	D134
91		C240	D98	S93	A247	A90	A95	D257	A96	V212	V226	V253	V249	V146	P106	A103	A103	A105	I104	L226	S107	D212	E394	G218	A424	P248	P263	E260	A1295	A1303	A210	S238	S225	S302	C228	A302	D143	S228	D195	D196	D186	A168	A169	A237	D152	A101	S140	A136	S135
92		D241	D99	D94	D248	D91	D96	D258	N97	D213	D227	D254	D250	D147	D107	D104	D104	D106	D105	D227	D108	D213	D395	M219	A425	D249	N264	D261	D1296	D1304	H211	H239	H226	H303	H229	H303	D144	D229	D196	D197	D187	D169	D170	D238	D153	D102	D141	D137	D136
93		M242	N100	D95	H249	L92	L97	I259	L98	M214	Q228	L255	L251	L148	M108	T105	T105	T107	V106	L228	L109	L214	L396	D220	D426	I250	V265	H262	Q1297	Q1305	C212	C240	C227	C304	C230	C304	N145	A230	N197	N198	N188	N170	N171	I239	T154	I103	L142	T138	L137
94		A243	I101	L96	V250	Q93	Q98	R260	L99	E215	V229	I256	I252	L149	L109	L106	L106	L108	L107	K229	I110	E215	D397	F221	Y427	K251	N266	Y263	I1298	I1306	E213	E241	E228	E305	E231	E305	Y146	M231	T198	T199	T189	Y171	Y172	I240	L155	T104	I143	R139	I138
95		P244	Y102	L97	P251	H94	D99	L261	F100	F216	F230	P257	P253	P150	V110	V107	V107	V109	V108	Y230	V111	V216	I398	P222	P428	L252	F267	L264	V1299	V1307	C214	A242	C229	C306	C232	V306	V147	F232	Y199	Y200	Y190	F172	I173	E241	I156	S105	N144	D140	N139
96		N245	M103	H98	S252	P95	P100	E262	T101	R217	Q231	M258	M254	L151	I111	L108	L108	L110	R109	K231	T112	A217	A399	I223	I429	Y253	Y268	A265	R1300	R1308	T215	N243	N230	T307	N233	A307	N148	T233	S200	S201	S191	-	-	T242	S157	F106	P145	F141	P140
97		P246	P104	E99	R253	P96	P101	P263	S102	D218	D232	N259	N255	N152	N112	A109	A109	S111	D110	T232	G113	P218	V400	K224	R430	C254	C269	P266	T1301	T1309	A216	V244	E231	E308	S234	V308	P149	D234	R201	L202	L192	P173	P174	P243	A158	P108	P147	P143	P142
98		L247	D105	R100	D254	E97	E102	D264	P103	H219	K233	D260	D256	D153	P113	N110	N110	N112	S111	N233	D114	D219	D401	T225	T431	D255	K270	D267	D1302	D1310	G217	N245	H232	G309	G235	N309	K150	M235	E202	E203	E193	G174	G175	P244	Q159	D109	M148	Q144	L143
99		W248	R106	A101	F255	V98	L103	S265	-	-	-	H261	H257	N154	-	-	-	-	-	-	-	F220	F402	N226	N432	I256	I271	F268	-	-	W218	W246	W233	W310	W236	W310	A151	V236	L203	L204	L194	A175	A176	S245	D160	W110	F149	L145	F144
100	HyPhoCore	V249	L107	L102	L256	I99	I104	I266	I104	V220	F234	-	-	-	L114	I111	I111	V113	L112	I234	L115	F221	F403	L227	D433	N257	N272	-	M1303	M1311	L219	L247	L234	L311	L237	Y311	L152	F237	F204	F205	F195	V176	V177	L246	L161	I111	V150	A146	V145
101		Q250	L108	-	A257	P100	H105	L267	G105	G221	G235	-	-	-	D115	D112	D112	D114	T113	R235	T116	-	-	E228	Q434	Y258	Y273	Y269	Y1304	Y1312	E220	P248	E235	E312	E238	A312	L153	E238	E205	E206	Q196	W177	N178	I247	V162	T112	P151	Y147	P146
102		S251	K109	E103	R258	K101	E106	R268	-	-	-	N262	N258	L155	D116	D113	D113	E115	P114	E236	D117	E222	S404	I229	L435	D259	D274	H270	D1305	D1313	P221	P249	P236	P313	P239	P313	Q154	L239	E206	E207	E197	E178	E179	Q248	F163	K113	W152	G148	W147
103		Y252	M110	D104	T259	L102	L107	V269	-	-	-	T263	A259	L156	L117	L114	L114	L116	L115	L237	L118	Y223	F405	V230	V436	V260	V275	V271	L1306	L1314	L222	L250	L237	L314	L240	L314	L155	P240	M207	M208	M198	Y179	Y180	D249	A164	A114	L153	V149	L148
104		M253	V111	L105	V260	I103	V108	L270	K106	V222	V236	Y264	Y260	Y157	L118	F115	F115	F117	W116	F238	F119	F224	L406	R231	A437	F261	F276	F272	V1307	V1315	L223	L251	L238	L315	L241	V315	L156	W241	R208	R209	R199	V180	V181	M250	F165	E115	V154	L150	V149
105		E254	R112	Y106	G261	E104	D109	A271	E107	E223	E237	R265	R261	E158	R119	E116	D116	D118	D117	E239	E120	Q225	S407	K232	F438	K262	Q277	K273	Q1308	E1316	A224	D252	E239	D316	E242	A316	K157	E242	W209	S210	T200	R181	K182	T251	S166	E116	G155	G151	G150
106		-	E113	N107	Y262	A105	K110	H314	I108	I224	T238	C266	C262	Y159	T120	R117	R117	R119	T118	-	L121	A226	Q408	L233	L439	W263	F278	K274	L1309	H1317	R225	R253	R240	R317	R243	P317	T158	R243	T210	T211	T201	A182	D183	K252	I167	A117	P156	P152	P151
107		L255	L114	Y108	F263	I106	W111	A315	-	-	-	-	-	-	D121	-	-	-	D119	E240	D122	T227	S409	C235	R441	M264	M279	M275	D1310	P1318	I226	I254	V241	I318	I244	I318	F159	Y244	R211	R212	R202	Y183	Y184	-	W168	A118	L157	V153	L152
108		L256	D115	G109	V264	K107	R112	E316	L109	L225	L239	F267	F263	P160	I122	E118	E118	-	L120	F241	L123	Y228	I410	S236	Y442	Q265	N280	W276	L1311	L1319	K227	A255	A242	A319	G245	S319	P160	K245	G212	R213	K203	A184	A185	H253	Q169	D119	L158	L154	L153
109		D259	T116	K110	E265	N108	E113	Y317	P110	T226	G240	-	-	-	S123	-	-	-	G121	D242	G124	P229	H411	T237	R443	E266	K281	K277	E1312	D1320	H228	R256	E243	R320	R246	K320	Q161	D246	-	-	-	A185	A186	N254	Q170	F120	T159	E155	T154
110		D260	P118	N112	P267	G109	G114	D318	P111	P227	E241	S268	S264	S161	D124	-	-	G120	D122	N243	E125	L237	L419	G238	D444	E268	D283	E285	G1313	G1321	D229	N257	D244	N321	D247	D321	R163	N248	-	-	-	T192	S193	K255	P172	G121	D161	P157	E156
111		N261	E119	N113	D268	S110	-	H319	S112	L228	S242	Q269	Q265	G164	Y125	E119	E119	E121	N123	F244	N126	W238	Y420	E239	M445	K269	K284	C286	A1314	A1322	R230	R258	R245	S322	E248	R322	D164	L249	-	-	-	P193	E194	A256	D173	Y122	G162	G158	G157
112		V262	K120	S114	L269	-	Y115	D320	L118	F229	V243	P270	P266	P165	I126	L120	L120	F122	W124	L245	Y127	C239	C421	N240	N446	V270	I285	D287	P1315	P1323	R231	K259	T246	T323	T249	T323	V165	V250	-	-	-	F194	Y195	I257	Q174	G123	V163	V159	I158
113		A263	A121	D115	F270	D111	D116	F321	G119	G230	A244	R271	R267	L166	L127	S121	S121	S123	L125	P246	L128	V240	I422	N241	F447	Y271	Y286	L289	Y1316	Y1324	T232	T260	R247	T324	A250	I324	Y166	M251	V213	V214	V204	A195	T196	L258	I176	L124	H164	R160	Q159
114		L264	V122	L116	L271	I112	I117	A322	T120	T231	Q245	H272	H268	H167	A128	A122	A122	A124	G126	G247	A129	S241	S423	L242	L448	G272	G287	S290	G1317	G1325	V233	I261	V248	V325	V251	C325	V167	H252	S214	S215	S205	M196	M197	A259	G177	V125	L165	F161	L160
115		I265	I123	I117	V272	A113	V118	E323	M121	L232	L246	I273	I269	I168	A129	A123	A123	A125	A127	A248	A130	A242	A424	E243	K449	F273	F288	L291	F1318	F1326	V234	V262	V249	V326	V252	T326	G168	G253	V215	V216	V206	V197	V198	A260	F178	R126	V166	V162	V161
116		G266	Y124	I118	Q273	I114	Y119	Y324	H122	H233	Q247	S274	S270	A169	A130	P124	P124	P126	S128	V249	A131	W243	W425	T244	S450	T274	V289	G292	T1319	A1327	C235	C263	S250	C327	C253	V327	K169	W254	W216	W217	W207	R198	R199	N261	-	H127	K167	K163	K162
117		P267	A126	G119	T274	G115	A120	P325	P123	P234	A248	V275	V271	G170	S131	D125	D125	D127	I129	R261	R132	N244	N426	E245	H451	V275	L290	T293	P1320	P1328	P236	P264	P251	P328	P254	P328	P170	N255	P217	P218	P208	I199	L200	I262	-	Y128	S168	A164	S163
118		R268	S127	K120	P275	S116	T121	L326	G124	G235	W249	A276	A272	P171	H132	P126	P126	P128	D130	H262	S133	D245	D427	K246	G452	S276	N291	Y294	M1321	M1329	I237	M265	I252	V329	V255	L329	S171	E256	V218	V219	V209	L200	H201	Y263	V179	F129	F169	A165	F164
119		K269	K128	Y121	H276	R117	R122	-	F125	F236	W250	M277	M273	-	T133	G127	G127	G129	L131	T263	C134	-	-	M247	R453	I277	L292	S295	C1322	C1330	I238	I266	I253	I330	I256	I330	L172	M257	G219	A220	G210	W201	W202	Q264	P180	P130	Y170	Y166	Y165
120	HV2	Y270	T129	G122	F277	Y118	R123	-	Y126	Y237	Y251	D278	D274	-	G134	W128	W128	W130	F132	F264	F135	-	-	P248	D454	H278	Y293	A296	D1323	D1331	D239	D267	D254	D331	D257	D331	N173	V258	L220	F221	L211	R202	R203	R265	R181	R131	R171	R167	R166
121		I271	Y130	V123	F278	V119	S124	-	N127	G238	K252	K279	K275	K172	K135	P129	P129	P131	V133	W265	G136	-	-	P249	N455	E279	D294	-	S1324	S1332	V240	V268	V255	V332	T258	V332	R174	Y259	V221	V222	V212	Y203	H204	F266	K182	A132	R172	R168	R167
122		D272	H131	E124	I279	K120	R125	N327	K128	S239	A253	F280	F276	L173	T136	D130	D130	D132	E134	Q266	-	-	-	N250	A456	-	-	-	R1325	R1333	I241	I269	I256	I333	I259	I333	P175	-	G222	G223	G213	K204	K205	Y267	H183	S133	P173	P169	P168
123		-	L132	G125	-	-	-	-	P129	S240	D254	G281	G277	H174	D137	-	-	-	R135	F267	-	-	-	-	R457	-	-	-	-	-	S242	D270	N257	S334	D260	N334	I176	-	G223	G224	G214	P205	P206	-	-	-	L174	F170	L169
124		T273	E134	G127	N280	G121	Q126	D328	E136	E247	E261	F282	F278	P175	N140	-	-	-	G138	E270	-	N246	Q428	E252	-	Y280	S295	S297	K1326	V1334	S252	A280	S267	G346	G271	G344	E180	D260	R235	K237	K226	G212	T212	D268	V184	-	G182	S175	G177
125		S274	N135	R128	P281	G122	E128	N329	R137	R248	R262	S283	S279	K176	N141	-	-	-	Y139	N271	-	G247	G429	E253	-	E281	P296	R298	E1327	E1335	D253	G281	A268	G347	E272	G345	L181	Q261	V236	V238	V227	V213	L213	E269	S185	-	A183	I176	V178
126		K275	R136	S129	D282	K123	T129	-	R138	R249	R263	L284	L280	Y177	V142	-	-	-	K140	P272	-	K248	Y430	R254	-	V282	Q297	S299	M1328	M1336	M254	D282	D269	V348	P273	G346	Q182	K262	V237	V239	V228	V214	Y214	E270	T186	-	G184	E177	C179
127		H276	D137	V130	P283	V124	W130	-	D139	P250	K264	P285	P281	H178	N143	-	-	-	Q141	K273	-	E249	E431	W255	-	T283	T298	F300	E1329	E1337	T255	A283	L270	N349	M274	A352	S183	N263	G238	R240	G229	F215	F215	K271	-	-	A185	E178	A180
128		T277	I138	P131	I284	E125	V131	-	A140	Q251	E265	Y286	Y282	Y179	R144	-	-	-	K142	T274	-	Q250	H432	K256	-	I284	I299	Y301	G1330	G1338	Y256	R285	K271	V350	I275	R353	K184	-	F239	W241	W230	R216	K216	Q273	S187	-	T186	D179	T181
129		R331	V139	K132	Q285	N126	K132	-	S141	S252	S266	V287	V283	D180	I145	-	-	-	I143	R275	-	M251	T433	K257	-	P285	E300	G302	F1331	Y1339	G257	G286	G272	G351	G276	G354	Q185	W264	H240	K242	Y231	R217	K217	P274	S188	T134	G187	G180	G182
130		-	K140	A133	R286	W127	Q133	-	T142	Q253	A267	-	-	-	R146	-	-	-	G144	V276	-	V252	A434	R258	-	T286	T301	M303	R1332	R1340	G258	A287	G273	G352	G277	A355	R186	I265	T241	T243	T232	Y218	W218	S275	G189	D135	G188	G181	G183
131		-	E141	I134	L290	P128	F134	-	A143	A254	A268	-	-	-	L147	-	-	-	M145	G277	-	D253	E435	Y259	-	L287	L302	A304	F1333	F1341	F259	F288	F274	F353	F278	W356	T187	G266	A242	V244	G233	G219	G219	I276	I190	A136	G189	G182	G184
132		-	T142	F135	G291	F129	T135	-	Y144	Y255	Y269	-	-	-	G148	-	-	-	A146	D278	-	S254	D436	A260	-	W288	W303	D305	W1334	W1342	N260	D289	D275	D354	D279	D357	K188	-	W243	F245	W234	R220	R220	R277	Y191	M137	R190	R183	R185
133		-	V143	E136	D292	Y130	A136	-	I145	I256	I270	-	-	-	T149	-	-	-	D147	P279	-	S255	-	V261	-	Q289	T304	K306	K1335	K1343	W261	W290	W276	W355	W280	W358	L189	-	E244	D246	R235	V221	V221	P278	S192	I138	V191	V184	V186
134		-	R144	K137	R293	R131	K137	-	P146	P257	P271	-	-	-	D150	-	-	-	G148	P280	A137	P257	P437	V262	-	T290	S305	V307	Q1336	T1344	K262	E291	N277	N356	R281	S359	V190	-	P245	P247	A236	S222	S222	Y279	Y193	T139	T192	T185	T187
135		-	P145	G138	C294	K132	M138	-	E147	K258	F272	-	-	-	T151	-	-	-	E149	P281	G138	E258	A438	D263	-	S291	T306	D308	G1337	G1345	L263	M292	L278	L357	L282	M360	R191	-	S246	H248	D237	E223	E223	D280	G194	W140	E193	E186	E188
136		-	A146	N139	P295	L133	F139	-	G148	D259	G273	-	-	-	D152	-	-	-	Y150	P285	V139	L259	L439	G264	-	M292	M307	V309	Y1338	Y1346	N264	Y293	V279	Q358	T283	L361	F192	-	R247	R249	R238	R224	I224	F281	G195	M141	L194	L187	L189
137		-	A147	V140	P296	I134	Y140	-	E149	E260	E274	-	-	-	-	-	-	-	-	-	-	L260	L440	-	R460	D293	D308	K310	W1339	W1347	F265	Y294	F280	F359	F284	W362	W193	-	P248	P250	P239	N225	T225	N282	F196	I142	V195	T188	V190
138		-	Q148	A141	E297	S135	K141	-	G150	G261	G275	-	-	-	-	-	-	-	-	-	-	Y261	Y441	-	K461	F294	F309	T311	K1340	A1348	R266	K295	K281	S360	Q285	K363	-	-	-	-	-	N226	N226	N283	N205	T143	A196	A189	A191
139		-	V149	K142	N298	K136	V142	-	R151	D262	D276	-	-	-	-	-	-	-	-	-	-	R262	R442	-	Q462	I295	V310	W312	S1341	N1349	W267	R296	W282	W361	W286	R364	-	-	-	-	-	R227	H227	W284	G206	R144	R197	K190	R192
140		-	T150	A143	E299	G137	I143	-	Y152	F263	F277	-	-	-	-	-	-	-	-	-	-	T263	V443	-	G463	K296	E311	K313	H1342	Y1350	Y268	I297	D283	H362	H287	V365	-	-	-	-	-	A228	Y228	Q285	D207	T145	P198	P191	P193
141		-	W151	D144	M300	A138	G144	-	-	-	-	-	-	-	-	-	-	-	-	-	-	D264	E444	-	L464	K297	E312	S314	L1343	L1351	P269	P298	Y284	P363	S288	P366	-	-	-	-	-	L229	L229	E286	Q208	G146	L199	L192	L194
142		-	N152	I145	F301	I139	R145	-	-	-	-	-	-	-	-	-	-	-	-	-	-	-	-	-	D465	N298	H313	-	R1344	K1352	V270	I299	M285	V364	V289	L367	-	-	-	-	-	N230	N230	S287	Y209	F147	L200	F193	L195
143		-	A153	I146	Y302	M140	M146	-	-	-	-	-	-	-	-	-	-	-	-	-	-	-	-	-	R466	P299	P314	-	G1345	G1353	P271	P300	T286	P365	P290	T368	-	-	-	-	-	Q231	L231	D288	-	A148	A201	N194	A196
144		-	P154	D147	G303	V141	T147	-	-	-	-	-	-	-	-	-	-	-	-	-	-	-	-	-	L467	E300	N315	-	R1346	K1354	Q272	P301	P287	E366	K291	P369	-	-	-	-	-	L232	L232	T289	-	L149	A202	L195	A197
145		-	C155	N148	K304	G142	E148	-	-	-	-	-	-	-	-	-	-	-	-	-	-	-	-	-	F468	Y301	Y316	-	P1347	P1355	R273	E302	E288	R367	Q292	Q370	-	-	-	-	-	I233	V233	G290	-	L150	L203	F196	L198
146		-	A156	S149	I305	R143	I149	-	-	-	-	-	-	-	-	-	-	-	-	-	-	-	-	-	L469	L302	L317	-	-	-	E274	L303	Q289	E368	E293	E371	-	-	-	-	-	G234	S234	L291	-	W151	R204	Y197	R199
147		-	-	-	H306	I144	K150	-	-	-	-	-	-	-	-	-	-	-	-	-	-	-	-	-	E470	D303	N318	-	-	-	R277	Q304	R290	R369	R294	K372	-	-	-	-	-	G235	E235	E292	-	P152	P205	P198	P200
148		F332	I157	I150	F316	P155	P153	N330	Y153	Y264	Y278	Q288	Q284	N181	Y153	C131	C131	C133	Y151	G286	G140	F265	T445	L282	V489	C322	C345	T315	Y1348	Y1356	T290	V316	M305	T383	T308	A386	F194	L267	F249	F251	F240	T246	T246	G335	S210	Q161	Q212	Q205	Q207
149	G-loop	F333	D158	F151	F317	V156	N154	S331	Y154	Y265	Y279	Y289	Y285	F182	Y154	F132	F132	F134	F152	F287	F141	F266	M446	F283	D490	H323	H346	E316	H1349	H1357	M291	M317	I306	M384	M309	M387	A195	N268	P250	A252	A241	A247	G247	V336	M211	P162	P213	P206	P208
150	G-loop	S334	H159	Y152	C318	S157	T155	R332	A155	L266	H280	F290	F286	V183	N155	N133	N133	N135	N153	N288	N142	P267	P447	S284	G491	W325	W348	H317	I1350	I1358	A292	A318	A307	A385	A310	A388	T196	T269	D252	D254	D243	N248	N248	G337	V212	L163	L214	L207	L209
151	G151	G335	C160	A153	G319	G158	G156	S333	G156	G267	A281	G291	G287	G184	S156	S134	S134	S136	A154	S289	A143	G268	G448	G285	G492	S326	T349	N318	S1351	S1359	G293	G319	G308	G386	G311	G389	G197	G270	M253	M255	M244	A249	A249	G338	L213	G164	G215	A208	S210
152	G-loop	G336	S161	L154	S320	-	D157	K334	G157	G268	A282	G292	G288	G185	G157	G135	G135	G137	G155	G290	G144	L269	L449	S286	S493	N327	N350	M319	A1352	A1360	G294	G320	G309	G387	G312	G390	G198	S271	A254	A256	A245	G250	G250	G339	I214	G165	G216	G209	G211
153		N337	V162	S155	A321	F159	F158	-	L158	F269	I283	V293	V289	I186	L158	V136	V136	V138	V156	V291	V145	G270	G450	Y288	W495	F328	F351	G320	L1353	L1361	L295	L321	L310	L388	L313	L391	G200	F272	G255	G257	G246	E251	E251	C340	G215	E166	E217	E210	E212
154		V338	M163	M159	A322	F160	R159	-	S159	F270	F284	S294	S290	L187	L159	F137	F137	F139	L157	M292	L146	W271	W451	F289	F496	E329	E352	L321	Y1354	Y1362	F296	F322	F311	F389	F314	F392	F201	L273	F256	F258	F247	H252	H252	T341	A216	L167	Y218	F211	Y213
155		A339	-	-	V323	A161	L160	L335	G160	G271	G285	A295	A291	L188	L160	V138	V138	V140	L158	L293	L147	L272	V452	V290	L497	I330	I353	A322	V1355	V1363	S297	A323	V312	S390	A315	A393	C202	L274	A257	A259	A248	A253	A253	L342	F218	L168	A219	V212	A214
156	HyPhoCore	F340	H164	F160	L324	L162	M161	L336	G161	G272	G286	L296	L292	V189	I161	Y139	Y139	F141	I159	L294	I148	L273	L453	V291	L498	A331	V354	L323	V1356	V1364	I298	V324	M313	I391	V316	I394	I203	R275	V258	V260	V249	M254	M254	V343	F219	M169	A220	A213	A215
157		A341	R165	K161	R325	R163	D162	H337	C162	S273	T287	S297	S293	R190	N162	Q140	Q140	Q142	N160	N295	N149	L274	R454	T292	N499	N332	D355	T324	D1357	D1365	D299	D325	D314	D392	S317	E395	N204	N276	A259	N261	S250	S255	T255	K344	N220	R170	T221	D214	S216
158		K342	Y166	K162	R326	K164	R163	R338	T163	V274	P288	K298	K294	R191	K164	P141	P141	P143	K162	E297	K151	A275	R455	R293	R500	L333	L356	R325	L1358	L1366	R300	R326	K315	R393	K318	R396	R205	S277	P261	R263	Q252	L256	M256	A345	S221	R171	R222	R215	R217
159		K343	S167	S163	R327	E165	K164	R339	K164	Q275	T289	Q299	Q295	E192	R165	S142	S142	S144	K163	A298	K152	E276	S456	E294	R501	N334	D357	N326	N1359	Q1367	D301	K327	F316	E394	K319	E397	Q206	Q278	-	-	-	G257	K257	E346	Y223	E172	E223	E216	E218
160		W344	V168	V164	A328	V166	V165	I340	A165	E276	Q290	Q300	Q296	H193	A166	V143	V143	L145	W164	M299	W153	L277	L457	Y295	F502	L335	F358	A327	R1360	R1368	Y302	W328	Y317	F395	Y320	F398	L207	W279	L262	L264	V253	L258	L258	V347	L224	V173	L224	L217	L219
161		L345	L169	I165	L329	V167	V166	A357	Y166	V277	V291	F301	F297	F194	R167	E144	E144	H146	R165	R300	G154	W278	Y458	V296	V503	W336	L359	Y328	F1361	F1369	F303	F329	F318	F396	F321	F399	A208	S280	L263	I265	I254	A259	A259	H348	E225	A174	L225	F218	L220
162		F346	E174	D166	D330	E168	N167	E358	L167	Q278	L292	L302	L298	K195	E168	T145	T145	T147	R166	Q301	S155	A279	E460	G297	E504	R337	R360	Q329	R1362	R1370	Q304	W330	E319	D397	Q322	F400	L209	L281	L264	L266	L255	L260	E260	R349	L226	A175	T226	C219	T221
163		R347	K175	K167	E331	G169	A168	E359	K168	R279	N293	S303	T299	Q196	I170	N147	N147	K149	D168	P303	T157	E280	E461	V299	V506	S338	S361	K330	A1363	E1371	E305	E331	E320	R398	Y323	E401	K210	L283	D265	Q267	S256	R261	I261	D350	Q228	M176	S227	S220	S222
164		A348	F176	N168	A332	V170	I169	L360	L169	L280	I294	I304	I300	M197	D171	Q148	Q148	L150	I169	L304	I158	L281	L462	L300	T507	P339	E362	L331	L1364	L1372	I306	L332	L321	L399	L324	L402	M211	L284	K266	R268	N257	L262	L262	G351	K229	L177	V228	I221	L223
165		G349	G177	K169	G333	-	K170	G361	C170	T281	T295	N305	N301	N198	P172	L149	L149	L151	F170	Y305	R159	-	-	-	F508	A340	P363	I332	A1365	A1373	G307	G333	G322	G400	G325	G403	V212	D285	P267	S269	P258	P263	P263	A352	-	Y178	P229	P222	P224
166		-	-	I170	-	-	-	-	T171	R282	Q296	-	-	-	D173	L150	L150	L152	K171	S306	Q160	-	-	-	-	Y341	Y364	-	A1366	A1374	-	-	-	-	-	-	-	A286	N268	Q270	K259	L264	F264	-	Q230	E179	F230	F223	F225
167		-	-	-	-	-	-	-	T172	A283	E297	-	-	-	-	-	-	-	-	-	-	-	-	-	-	R342	E365	-	G1367	G1375	-	-	-	-	-	-	-	W287	A269	A271	A260	A265	S265	-	P231	D180	A231	L224	A226
168		-	-	-	-	-	-	-	I173	C284	C298	-	-	-	-	-	-	-	-	-	-	-	-	-	-	E343	K366	-	D1368	D1376	-	-	-	-	-	-	-	A288	Q270	Y272	V261	S266	T266	-	A232	E181	P232	T225	P227
169		W350	S178	K171	G334	E171	-	Q362	D180	D291	D305	G306	G302	G199	E174	H151	H151	Q153	M172	H307	K161	E282	E463	-	S509	D346	Q369	E333	T1376	A1384	T308	G334	K323	T401	T326	L404	P213	G291	D272	K274	K263	-	-	M353	H235	R182	-	-	-
170		F351	Y179	F172	F335	L172	Q171	P363	A181	Q292	K306	F307	F303	M200	I175	V152	L152	H154	S173	L308	L162	P283	P464	-	T510	T347	Y370	C334	L1377	L1385	Y309	Y335	Y324	Y402	Y327	Y405	W214	P292	S273	L275	R264	-	-	F354	A236	V183	-	-	-
171		D352	D181	K173	A336	N173	-	L364	T182	A293	K307	P308	P304	S201	F176	A153	A153	A155	S174	L309	I163	K284	K465	E301	D511	L348	L371	T335	S1378	S1386	D310	D336	D325	D403	D328	D406	A215	K293	T274	R276	R265	-	-	P355	L237	R184	-	-	-
172		E353	E182	T174	-	-	-	P365	N183	N294	N308	N309	N305	N202	S177	S154	S154	M156	E175	E310	D164	W285	W466	N302	D512	D349	E372	D336	A1379	A1387	A311	P337	M326	S404	T329	P407	S216	G294	A275	G277	G266	-	-	N356	I238	R185	-	-	-
173		E354	-	-	-	-	-	-	H184	G295	D309	N310	N306	Q203	F178	E155	E155	E157	W176	L317	L165	P286	P467	E303	-	H350	E373	T337	D1380	D1388	G312	G338	M327	G405	G330	G408	G217	K295	-	-	-	-	-	F357	D239	R186	-	-	-
174		T356	S183	F175	G337	P174	L172	L366	I186	E297	E311	W312	W308	W205	N185	S158	S158	S160	V183	R324	N172	-	-	D314	Y523	Y356	Y379	Y341	S1383	S1391	D314	E340	D329	D407	E332	Q410	L226	A313	-	V278	S267	-	-	F359	E240	-	-	-	-
175		H357	Y187	S176	E338	I175	P173	F367	P187	A298	A312	G313	G309	G206	L186	F159	F159	F161	M184	G325	V173	-	-	T315	T524	E357	E380	D342	L1384	L1392	I315	I341	V330	I408	V333	I411	I227	F314	P276	K279	Q268	-	-	Y360	T241	S187	-	-	-
176		W358	R188	K177	T339	G176	E174	I368	I188	V299	Q313	W314	W310	W207	L187	D160	D160	D162	Q185	H326	E174	K287	T468	Y316	L525	R358	R381	D343	A1385	A1393	W316	W342	W331	W409	W334	W412	R228	E315	R277	G280	P269	G267	G267	H361	Q242	D188	G233	G226	G228
177		G359	I189	T178	I340	F177	R175	K369	W189	W300	W314	G315	G311	G208	L188	G161	G161	G163	Y186	L327	E175	A288	W473	S317	L526	W359	W382	Y344	N1386	N1394	G317	G343	G332	G410	G335	G413	L229	A316	G278	G281	G270	Y268	Y268	L362	N243	W189	Y234	Y227	Y229
178	xED motif	G360	-	A179	T341	K178	T176	W370	H190	H301	H315	G316	G312	L209	P189	G162	G162	A164	Q187	G328	G176	F289	D474	P318	P527	G360	G383	N345	L1387	L1395	G318	G344	G333	G411	G336	G414	P230	D317	H279	Y282	M271	A269	S269	I363	C244	G190	G235	A228	G230
179		E361	G190	E180	E342	I179	R177	D371	D191	D302	D316	E317	E313	E210	D190	D163	D163	D165	D188	D329	D177	W290	W475	D319	A528	D361	D384	W346	D1388	D1396	E319	E345	E334	E412	E337	E415	D231	D318	L280	Q283	Q272	V270	I270	E364	D245	I191	V236	V229	V231
180		D362	D191	D181	D343	L180	F178	D372	E192	E303	E317	D318	D314	D211	Q191	Q164	Q164	Q166	Q189	Q330	Q178	D291	D476	E320	E529	A362	A385	D347	Q1389	Q1397	N320	Q346	N335	N413	N338	N416	D232	Q319	E281	E284	E273	E271	E271	T365	D246	D192	E237	E230	E232
181		N363	A192	Q182	A344	M181	M179	A373	S193	S304	S318	D319	D315	D212	D192	G165	G165	G167	D190	D331	S179	D292	M477	F321	S530	P363	P386	W348	D1390	D1398	L321	Y347	L336	L414	L339	F417	C233	S320	S282	S285	S274	P272	P272	E366	I247	T193	I238	T231	I233
182		E364	R193	L183	E345	E182	K180	D374	L194	H305	H319	D320	D316	E213	I193	L166	I166	L168	I191	F332	I180	W293	W478	L322	F531	V364	V387	T349	L1391	L1399	E322	E348	E337	E415	E340	E418	T234	A321	S283	S286	D275	Q273	Y273	G367	A248	L194	G239	G232	G234
183	HyPhoCore	F365	F194	F184	T346	I183	G181	Y375	I195	L306	L320	I321	I317	F214	L194	L167	L167	L169	L192	F333	L181	M294	M479	W323	F532	H365	R388	L350	P1392	P1400	I323	I349	I338	L416	L341	I419	V235	M322	L284	L287	F276	E274	E274	F368	M249	-	L240	I233	L235
184		G366	F195	T185	A347	L184	L182	G376	N196	N307	N321	Y322	F318	F215	N195	N168	N168	N170	N193	T334	N182	R295	R480	A324	H533	S366	S389	Q351	N1393	N1401	S324	S350	S339	S417	S342	S420	G236	V323	L285	L288	L277	L275	I275	A369	N250	Y195	L241	M234	L236
185		Y367	W196	I186	L348	I185	F183	L377	K197	K308	K322	N323	N319	V216	A196	T169	T169	S171	G194	M335	M183	R296	M481	T325	T534	I367	L390	Y352	N1394	H1402	F325	F351	F340	F418	F343	Y421	Y237	Y324	S286	R289	K278	V276	V276	K370	F251	T196	V242	I235	I237
186		R368	R197	E187	E349	K186	A184	R378	Y198	Y309	Y323	R324	R320	R217	M197	F170	F170	F172	L195	I336	L184	P297	P482	I326	V535	A368	A391	L353	M1395	M1403	R326	K352	R341	K419	R344	K422	I238	L325	H287	E290	Q279	S277	Y277	M371	L252	F197	D243	D236	D238
187		L369	-	F188	I350	G187	W185	A379	F199	L310	F324	L325	L321	I218	Y198	F171	F171	F173	F196	G337	F185	E298	E483	S335	L536	A369	L392	T354	Q1396	Q1404	I327	V353	V342	T420	V345	I423	I239	L326	L288	L291	I280	L278	I278	A372	V253	V198	T244	V237	T239
188		Y370	V198	L189	H351	K188	-	A380	L200	L311	L325	A326	V322	R219	G199	N172	S172	R174	K197	M338	K186	Q299	Q484	F336	E537	A370	A393	V355	A1397	F1405	W328	W354	W343	W421	W346	W424	E240	A327	V289	-	T281	L279	L279	K373	T254	T199	F245	L238	F240
189		R371	N199	M190	S352	Y189	-	E381	D201	R312	L326	F327	F323	D220	D200	S173	S173	N175	G198	E339	D187	R300	R485	P337	N538	L371	L394	S356	M1398	T1406	Q329	M355	Q344	M422	Q347	Q425	C241	T328	D290	V292	T282	E280	E280	R374	R255	V200	D246	K239	D241
190		E372	H200	N191	R353	S190	V186	H382	N202	H313	N327	R328	R324	A221	R201	W174	W174	W176	G199	H340	Q188	K301	R486	S338	S539	F372	F395	C357	I1399	I1407	C330	C356	C345	C423	C348	C426	K242	E329	P291	T293	V283	L281	R281	L375	H256	Q201	R247	K240	R242
191		G373	F201	S192	G354	-	G187	G383	P203	K314	K328	G329	G325	G222	I202	A175	A175	S177	V200	F344	Y189	G302	G487	S339	P540	-	-	L358	P1400	P1408	G331	G357	G346	G424	G349	G427	L243	R330	K292	L294	E284	Y282	F282	N376	T257	Q202	L248	V241	L243
192		C374	Y202	K193	W355	-	-	P385	P204	P315	P329	M330	M326	L223	Y203	I179	I179	I181	C201	H345	S190	R303	R488	R352	R551	L373	A396	P359	I1401	I1409	G332	G358	G347	G425	G350	G428	G244	W333	D293	D296	E285	G297	G298	Y377	G258	G203	G249	G242	G244
193		Y375	P203	-	K356	K191	-	T386	A205	T316	T330	S331	S327	Q224	P204	R180	R180	H182	Y202	V346	S191	A304	E489	F353	I552	P374	D397	K360	K1402	A1410	T333	R359	S348	T426	K351	K429	G245	G334	L294	L297	L286	V298	I299	D378	K259	V204	L250	L243	L245
194		F376	F204	-	S357	V192	-	V387	I206	K317	K331	V332	I328	V225	-	K181	K181	K183	-	-	-	C305	C490	V354	T553	K375	K398	F361	S1403	T1411	L334	M360	L349	L427	L352	L430	R246	G335	E295	E298	E287	E299	E300	V379	P260	S205	D251	G244	D246
195		R377	Y205	-	L358	V193	-	T388	T207	V318	I332	S333	S329	T226	-	H182	H182	H184	-	-	-	V306	I491	K355	N554	D376	S399	W362	L1404	L1412	E335	E361	E350	E428	E353	L431	L247	K336	P296	P299	P288	I300	I301	F380	S261	I206	A252	A245	A247
196		S378	P206	-	Y359	E194	-	-	L208	L319	L333	R334	R330	R227	-	L183	L183	L185	-	-	-	R307	I492	W356	W555	K377	S400	K363	-	-	I336	D362	I351	I429	I354	F432	Q248	V337	R297	K300	K289	F301	F302	G381	V265	Y207	I253	M246	I248
197		-	-	-	-	-	-	-	-	-	-	P335	P331	P228	-	-	-	-	-	-	-	-	-	Q357	N556	I378	I401	V364	-	-	-	-	-	-	-	-	P249	Y338	A298	A301	A290	Q302	Q303	-	-	E208	A254	A247	A249
198		V379	L207	-	I360	V195	-	L389	S209	S320	S334	G340	G336	G234	L205	-	-	-	A203	L347	L192	P308	P493	Q394	T590	F381	F404	P367	P1405	P1413	V337	I363	I352	V430	H355	V433	S250	R355	C301	C304	C293	E304	E305	L382	K266	I211	V256	V249	V251
199		E380	D208	-	D361	P196	-	P390	P210	P321	P335	K341	T337	T235	D207	P184	P184	P186	N204	D348	E193	E309	D494	H395	P593	S382	R405	Q368	Q1406	Q1414	T338	P364	P353	P431	P356	P434	P251	Y356	T302	T305	T294	T305	T306	P383	P267	P212	N257	D250	N252
200		-	E209	-	R362	F197	-	G391	A211	E322	E336	C342	T338	N236	L208	F185	F185	F187	S205	C349	D194	I310	V495	H396	T594	D383	D406	I369	E1407	E1415	C339	C365	C354	C432	C357	C435	L252	E357	R303	K306	K295	R306	L307	N384	I268	E213	L258	L251	L253
201		G381	E210	-	A363	T198	-	A392	-	-	-	R343	R339	D237	I209	I186	I186	I188	R206	T350	Q195	S311	S496	L397	F595	I384	I407	P370	-	-	S340	S366	S355	S433	S358	S436	F253	E358	V304	I307	V296	N307	N308	Y385	N269	G214	G259	G252	G254
202		A382	L211	-	M364	F199	-	A393	-	-	-	M344	H340	T238	-	-	-	-	-	-	-	R312	R497	F398	F596	G385	G408	R371	-	-	H341	R367	R356	H434	H359	R437	-	M359	L305	L308	L297	P308	P309	L386	-	K215	V260	E253	V255
203		M383	D212	-	I365	G200	-	I394	Y212	Y323	Y337	I345	I341	F239	Y210	Y187	Y187	Y189	F207	W351	Y196	T313	S498	A399	A597	Y386	Y409	I372	W1408	W1416	V342	V368	V357	V435	V360	V438	H254	I360	V306	V309	V298	H309	H310	V387	M270	-	R261	R254	R256
204		A384	L213	-	A366	I201	-	W395	L213	L324	C338	R346	R342	S240	N211	N188	N188	N190	N208	N352	N197	M314	Y499	-	-	H387	H410	F373	L1409	L1417	G343	G369	G358	G436	G361	G439	S255	E361	W307	W310	W299	L310	F311	Y388	V271	A216	E262	Q255	A257
205		-	-	-	-	-	-	-	-	F341	M354	-	-	-	V239	V210	V210	V212	V242	I380	I225	-	-	-	-	-	-	-	T1425	T1433	-	-	-	-	-	-	-	V375	-	-	-	-	-	-	-	-	-	-	-
206		Y385	-	-	-	-	-	-	-	T342	S355	-	-	-	L240	V211	V211	V213	S243	Y381	L226	-	-	-	-	-	-	-	I1426	I1434	-	-	-	-	-	-	-	T376	-	-	-	-	-	-	-	-	-	-	-
207	C-His	H386	N214	-	G367	R202	-	H396	-	A343	W356	H347	H343	H241	H241	H212	H212	H214	H244	H382	H227	T315	H500	N400	R598	H388	H411	H374	D1427	D1435	H344	H370	H359	H437	H362	H440	H256	H377	H308	H311	H300	H311	H312	H389	N272	H217	H263	N256	H258
208		Q387	Y215	-	L368	A203	-	M397	-	V344	Q357	S348	S344	I242	F242	F213	F213	F215	Y245	-	Y228	F316	F501	K401	K599	P389	T412	A375	L1428	L1436	V345	I371	V360	I438	V363	I441	L257	F378	T309	T312	T301	E312	E313	I390	L273	R218	R264	R257	R259
209		-	I216	-	Q369	R204	-	A398	-	-	-	R349	R345	H243	C243	L214	L214	L216	C246	-	I229	G317	G502	F402	F600	P390	P413	G376	C1429	C1437	F346	Y372	F361	F439	F364	Y442	E258	V379	R310	R313	R302	N313	D314	E391	E274	L219	N265	H258	N260
210	HV3	-	T217	-	P370	G205	-	W399	-	P345	T358	D350	D346	N244	G244	G215	G215	G217	G247	-	S230	G320	G505	M404	A602	-	-	C378	N1431	N1439	R347	R373	R362	R440	P365	R443	T259	G380	T311	T314	T303	K314	K315	E392	E276	G221	R266	Q259	R261
211		-	D218	-	E371	E206	-	S400	-	K346	K359	K351	K347	H247	R245	Q216	R216	S218	P248	-	Q231	V321	L506	D405	V603	-	-	G379	P1432	P1440	-	-	-	-	-	L444	L260	C381	E312	E315	E304	G315	G316	-	T277	G222	P267	H260	P262
212		-	-	-	T372	S207	-	-	-	-	-	-	-	-	-	-	-	-	-	-	-	H323	N509	-	-	-	-	H381	-	-	-	-	-	-	-	E445	G264	-	-	-	-	-	-	-	H285	-	-	-	-
213		-	-	-	F373	K208	-	-	-	-	-	-	-	-	-	-	-	-	-	-	-	G324	G510	-	-	-	-	H382	-	-	-	-	-	-	-	G446	A265	-	-	-	-	-	-	-	R286	L223	-	-	-
214		-	-	-	A374	L209	-	-	-	-	-	-	-	-	-	-	-	-	-	-	-	Q325	Y511	-	-	-	-	-	L1433	M1441	K348	K374	K363	K441	K366	Q448	A266	-	-	-	-	-	-	-	A287	D224	-	-	-
215		-	-	-	S375	K210	-	-	-	-	-	K352	K348	R248	-	-	-	-	-	-	-	F326	F512	-	-	-	-	K383	T1434	T1442	A349	Y375	Q364	R442	R367	G449	Q267	-	-	-	-	-	-	-	E288	D225	-	-	-
216		-	-	-	F376	G211	-	-	-	-	-	N353	N349	K249	D246	T217	V217	M219	A249	-	D232	F327	H513	-	-	-	-	K384	K1435	K1443	T350	V376	H365	S443	A368	N450	L268	-	-	-	-	-	-	-	H289	L226	-	-	-
217		-	Q219	-	I377	K212	-	D407	-	N347	E360	E354	E350	R250	K247	K218	K218	K220	K250	-	K233	D328	E514	V406	V604	-	-	T385	E1436	E1444	P351	P377	P366	P444	P369	P451	P269	K382	-	-	-	D316	K317	-	F290	R227	L268	L261	L263
218		-	S220	-	Q378	T213	-	W408	-	H348	Y361	P355	P351	D251	P248	P219	P219	P221	P251	-	P234	Q329	A515	D407	N605	-	-	C386	P1437	P1445	Y352	Y378	Y367	Y445	Y370	P452	E270	P383	-	-	-	E317	E318	-	L291	T228	A269	R262	D264
219		-	-	-	Q379	I214	-	Q409	-	Q349	N362	N356	N352	T252	W249	W220	W220	W222	W252	-	W235	H330	Y516	P408	Q606	-	-	R387	K1438	K1446	T353	K379	T368	K446	A371	P453	Q271	C384	-	-	-	H318	H319	-	Q292	M229	E270	D263	E265
220		-	-	-	R380	F215	-	A410	-	A350	V363	P357	P353	Q253	K250	N221	N221	N223	H253	-	N236	L331	F517	-	E607	-	-	P388	-	-	F354	V380	F369	W447	R372	I454	V272	G385	-	-	-	I319	V320	-	R293	L230	L271	L264	L266
221		-	-	-	G381	E216	-	Y411	-	V351	V364	Q358	Q354	K254	-	Y222	Y222	Y224	-	-	-	K332	K518	-	I608	-	-	S389	-	-	P355	P381	P370	R448	P373	Y455	T273	K386	-	-	-	R320	K321	-	S294	V231	G272	S265	G267
222		-	-	-	R382	Y217	-	F412	-	-	-	R359	R355	C255	-	T223	T223	K225	-	-	-	F333	K519	-	I609	-	-	-	-	-	G356	A382	G371	S449	N374	V456	L274	F387	-	-	-	D321	E322	-	Y295	E232	A273	R266	A268
223		-	-	-	W383	-	-	H413	-	-	-	F360	F356	F256	-	Y224	Y224	Y226	-	-	-	I334	H520	-	-	-	-	T390	-	-	G357	G383	G372	G450	-	G457	S275	G388	-	-	-	M322	M323	-	C296	C233	M274	M267	M269
224		-	-	-	A384	L218	-	L414	-	-	-	A364	A360	E260	-	V231	V231	V233	-	-	-	K335	K521	-	-	-	-	Q391	-	-	N363	A387	A378	K455	L376	L462	K282	V392	-	-	-	L323	L324	-	N298	F234	S275	S268	S270
225		-	-	-	T385	R219	-	R415	-	-	-	H365	H361	M261	-	T241	T241	L234	-	-	-	L336	F522	-	-	-	-	S392	-	-	K364	R388	R379	K456	Q377	K463	L283	E393	-	-	-	L324	L325	-	K299	A235	R276	Y269	R271
226		-	-	-	G386	H220	-	N416	-	-	-	T366	T362	T262	-	H242	H242	E235	-	-	-	N337	N523	-	-	-	-	A393	-	-	N365	N389	N380	N457	N378	N464	N284	R394	-	-	-	A325	L326	-	L300	A236	Q277	A270	Q272
227		-	-	-	M387	I221	-	R417	-	-	-	K367	K363	R263	-	P243	P243	Q236	-	-	-	Q338	T524	-	-	-	-	Q394	-	-	N366	L390	T381	S458	T379	Y465	V285	C395	-	-	-	C326	S327	-	V301	I237	V278	V271	V273
228		-	-	-	M388	Y222	-	L418	-	-	-	E368	E364	K264	-	Q244	E244	G237	-	-	-	Q339	V525	-	-	-	-	I395	-	-	R367	K391	R382	V459	A380	V466	I286	L396	-	-	-	L327	L328	-	N302	Q238	I279	V272	I274
229		-	-	-	Q389	R223	-	V419	-	-	-	T369	T365	R265	-	F245	F245	S238	-	-	-	F340	P526	-	-	-	-	E396	-	-	R368	R392	R383	R460	R381	R467	K287	R397	-	-	-	A328	A329	-	I303	S239	A280	R273	A275
230		-	-	-	M390	-	-	-	-	-	-	M370	M366	D266	-	L246	L246	L249	-	-	-	V341	G527	-	-	-	-	S397	-	-	L369	V393	A384	L461	A382	V468	L288	Q398	-	-	-	T329	T330	-	Y304	-	T281	A274	T276
231		-	-	-	L391	L224	Y188	V420	-	R352	R365	E384	D380	K280	K251	W250	W250	W253	-	-	-	-	-	-	-	Y391	Y414	S414	L1439	L1447	P386	P410	P401	-	P399	P485	E296	Q409	K313	K316	K305	E346	K347	-	L309	L240	F298	-	F293
[truncated: 1 more columns]
