# Supplementary material for: Deep evolutionary analysis reveals the design principles of fold A glycosyltransferases
Source: eLife journal article supplement (doi:10.7554/elife.54532), 2020-04-01
Supplement: supp [file elife-54532-supp-v1.zip › elife_poa_e54532_Supplementary_file_3.xlsx]

## Sheet: Sheet1
Supplementary file 3: The ancient archeal and bacterial sequences that most closely resemble the GT-A core consensus. These sequences were collected by running a BLAST search against a single consensus sequence generated from the seed profiles of all GT-A families. The hits were further filtered to keep sequences that only had the minimal GT-A core (Supplementary file 1).
GenBank ID	# of Aligned Positions	# of Inserts	# of Gaps	Sequence Description	Alignment to GT-A profile
OMP20844.1	161	12	70	bi-functional transferase/deacetylase, partial [Streptomyces sp. WAC00263]	VIVPAYNEK-ECIANTLHSLAQSTHP---IEIIVVDDGSTDGTKEIAESLGLPnVRVIRQE-N--AGKPAALNNGVRNA---SYDIVVMMDGDTVFEPDAVHQLVQPFADPGIGAVAGNAKVG-NRNTVIGAWQHieYVMGFNLDRRMYDllrcmpTIPGAIGAFRRDAvleVGGMS--------EDTLAED---------------------------------------------------
WP_106394344.1	210	18	21	polyprenol monophosphomannose synthase [Enhygromyxa salina]	VLLPTYNER-ENLDAIldaILAA--EPD----FHVLVIDDGSPDGTGELADRRAAADERVFVLHRSGkQGLGKAYVAGFDWG---LGhargyTHLFEMDADFSHDPRYLGPLLRACTEGGADLAIGSRYVP-GGGTRGWPWHRQLLSRGGGLYARTilglpihdPTAG-FICFSRHVLEALDlH--ALA--TRGYGFQIELKYRVVRAGFRVLE-IPIVFVE--RERGQSKMSGKIAAEA-LLKVVE-L
PRP92155.1	210	18	21	Undecaprenyl-phosphate mannosyltransferase [Enhygromyxa salina]	VLLPTYNER-ENLDAIldaILAA--EPD----FHVLVIDDGSPDGTGELADRRAAADERVFVLHRSGkQGLGKAYVAGFDWG---LGhargyTHLFEMDADFSHDPRYLGPLLRACTEGGADLAIGSRYVP-GGGTRGWPWHRQLLSRGGGLYARTilglpihdPTAG-FICFSRHVLEALDlH--ALA--TRGYGFQIELKYRVVRAGFRVLE-IPIVFVE--RERGQSKMSGKIAAEA-LLKVVE-L
OGO09059.1	199	19	32	glycosyl transferase [Chloroflexi bacterium RBG_13_60_9]	VVIPVYNEK-NTVAEIlrrVKAT--GRA----DEIIFVDDGSTDGTREFLGTLASP-PEVKVVFHEKnMGKGAALRTGFQHA---GGDVILIQDADLEYNPAEYPALLEPIECGQADVVYGSRFLG--------AKHRVTMFWhmVANQLltfaTNVlynsilsdMETG-YKVFKADFLKSI----PLR--ANRFDFEPEITAKILKRRARVFE-IPISFNP--REYDEgKKIGLADAFAA-VWALIK--
ODT76752.1	206	18	25	hypothetical protein ABS71_03085 [bacterium SCN 62-11]	IIVPVFNEE-TSVVEVverLLALPlpEGLT----TEIIVVDDGSTDGTTRILQGFASN-PALKIHYSVLnFGKGVAVRVGLRYA---QGDIVAIQDADLEYDPDHLLELIKPIREGRTDVVYGSRYlgTN-QGMVVLQNLGNRILTAFCN----LlygtkltdTYTC-YKIMTREVAAEMSR--VLT--ARGFELEAEITARLLLMGKKPLE-LPIRYLA--RTRsqGK-KIRARDGFKG-LWWTLR-I
WP_107569656.1	214	16	17	polyprenol monophosphomannose synthase [Conexibacter sp. Seoho-28]	-VLPTFNEA-ENVERIvlaAHAVLSACAPDG-FRILVVDDSSPDGTGAIADRLAAAHAEVEVLHRTErDGLGPAYLAGFAHA---LERgaaYVFEMDADFSHAPADLARLLAAVRDGGADVALGSRYVP-GGSVTDWGLVRKVVSRGGSWYARRvlglavrdLTGG-FKCFRREVLEAIDlP--TVR--SHGYAFQVELTYRAVQQGFTVTE-VPIVFRD--RELGQSKMSPTIAVEA-MWLVPQ-L
GBR74968.1	190	9	41	glycosyl transferase GTA-type super family, partial [Candidatus Termititenax aidoneus]	-IIPVYNEE-GFLRECLESVQRQSVKE--LEIICVDDGSTDNSATLLQKYAERfpNITVVRQEN--SGAGPARNKGLALA---KGEYILFVDADDFLLNTDTLQHMVELADeNKVDVVSANLKEFKyGNLFGCSFFGSYAVGQNILLPEN-YEIPWYF-F-RNIYRRKF---LLEnkisfP-DYRRGQDVVFLAKVLSLVKYIYV-CAEDLYV--YRV----------------------
OGS03918.1	204	16	27	hypothetical protein A2278_01675 [Elusimicrobia bacterium RIFOXYA12_FULL_49_49]	IIIPTYNEK-ENIERLlesLSA----FS----ADILIVDDNSPDGTAEMVNKFSRKDSRIKLLSRQGkLGLASAYIEGFSRA---ISggyEYVITMDADLSHPPELIAELTRAGES----FVTGSRYVK-GGKITGWPFYRHILSRGANFYARTvlglknrdLTSG-FNFISTALLKEIEyQ--KLS--SEGYGFLIEMKYRAIKKGFSIKE-IPITFTE--RKNGSSKLGKSIIVEA-FLLVLR-L
OGO41381.1	206	14	25	glycosyl transferase [Chloroflexi bacterium RBG_16_57_9]	VIIPVYNEQ-ATITEIikrVRAQnLNGVE----KELIVVDDGSTDGTREMLNQLPPQVDTRILLHEFNq-GKGAAVRTGLTQA---IGDLILIQDADLEYDPRDYPQLLQPILEGRAKVVYGSRFL--GGPRKAMLFWHMVGNKVLTLITNIlfdsilsdMETG-YKVFSAEVIRGI----PLR--SRRFEFEPEVTAKVLKRGHRIFE-VPITYTG--REYTEgKKISPRDGFLA-LWTLI---
KPV50934.1	209	16	22	dolichyl-phosphate beta-D-mannosyltransferase [Kouleothrix aurantiaca]	VVVPTYNEA-ENITRLiaaVLEQ--GPQ----FDVLVVDDGSPDGTGDMVAALAAHNSRVQLLRRSGkLGLGTAYVAGFREG---LRQgyqYMCEMDADFSHQPGYLPVLL-AVAERAADVALGSRNVP-GGRVENWSRLRQLISRGGSWYARTllglpirdVTGG-YKCFRASVLQQLDlA--AIN--ANGYGFQVEMNYRCHQAGFRIHE-IPIVFPD--RVAGQSKMSQQIVWEA-AALVLR-L
OHA08330.1	209	17	22	hypothetical protein A3B37_03665 [Candidatus Sungbacteria bacterium RIFCSPLOWO2_01_FULL_59_16]	IVIPTYNER-ENIIPLveeLFRAIPDEA-----RILVVDDGSPDGTADLVRSYGAREERLELMTRPRkLGMGSAYQAAFarilREG---GDDVVLTMDADFSHSPRYVPELIWAAE--THDLVVGSRYVP-GGRIENWELWRRALSWGGNFYVRLitglpirdCTAG-FSCMRTEFLAHIPfG--DVR--ATGYAWWFALRMMFYRRHARIAE-IPITFTD--RRLGKSKISTHVIYEG-LVEPWR-I
WP_118719861.1	148	4	83	glycosyltransferase family 2 protein [Clostridium sp. OF09-36]	VIIPVYNME-SYLEQCLNSVCSQTLEN--IEILCINDGSTDGSGEILEKYakNDKRIVLFQQTN--SGVAASRNLGIKCA---RGECVIFMDPDDWYPENDILE-VLYQKAtEHHALVCGGEFSDYnHMTGEYGYEFPERYYGYK-------------------FEKEG---FID---YR---DYQLIL----------------------------------------------
OJX94328.1	210	16	21	dolichol-phosphate mannosyltransferase [Micrococcales bacterium 73-15]	VIIPTYNER-EALPGTldrLRRSVPGAD------VLVVDDASPDGTGEWAEQLGERDAQVHVLHRTSkDGLGRAYIAGFGWA---LEhgyDLVVEMDADASHRPEELPRLLEAARDERVALVIGSRRVR-GGGTVNWPWYRQLISRAGTAYPRLvlrlpvkdATAG-FRAYPAWVLRTLpLD--EVE--SHGYAFQVDMTYRVHRMGGRIVE-VPITFVE--RVEGVSKMTGSIVREA-FVNVTR-W
WP_109132636.1	205	22	26	polyprenol monophosphomannose synthase [Cellulomonas sp. WB94]	VVIPTYDER-ENLPTAlerLRASV--PD----ADLLVVDDGSPDGTGELAEKIAAQDEEasgrttIYVLHRTGkLGLGTAYITGFRWA---LErgyDVIVEMDADGSHRAEDLPRLLDAVA--GADLVIGSRWVP-GGSVVNWPVSRQLLSRGGNTYTRLalglplrdATAG-FRAFRAETLATmALD--EVA--SAGYCFQVDMAWRVQRAGGRIVE-VPITFVE--RELGRSKMSRAIVVEA-LANV----
OHB76310.1	178	17	53	hypothetical protein A2Z34_05835 [Planctomycetes bacterium RBG_16_59_8]	VVIPAYNES-RHIASVvegLRGET----------IIVVDDGSTDGTADAAERAGAT-----VIRHRAnRGKGAALQTGFDAA---LARgcaAVVTIDGDGQHNIREIPKLTEASERHGAGVVVGRRQRI-RGI---MPRERRMVNSSSSALLSLltgqrladIHSG-FRFIRREVLERV----RLT--SSRFDAEVGFLMDAAGGGFKIVE-VP---VE--TIYGteESKI-----------------
OJX64698.1	210	16	21	hypothetical protein BGO95_02890 [Micrococcales bacterium 73-13]	VLVPTYNEA-ASLPPLvdrIRAAV--PD----ADILVIDDASPDGTGELAERIADADPHVRVLHRAAkEGLGPAYRAGYEAA---LARgyrYLVQMDADGSHPPETLPEMLAAAARPGTDLVIGSRWVP-GGRTVDWPRHRELLSRAANGYARRilrirvadVTAG-YRVYRAEALRELaLE--SIR--SHGYYFQVEMTVRVLDLGGGVTE-VPIVFAE--REAGASKMTMSIIAEA-MLRVTS-L
WP_051471065.1	209	21	22	polyprenol monophosphomannose synthase [Patulibacter minatonensis]	-VIPTFDEA-ENVERVvglsretLAAACPDG-----FRILIVDDGSPDGTGEIADRLAAAHPdEVRVLHRERpQGLGPAYLAGFEVA---LragATHVMEMDADLSHDPRDLARLLDAVR-GGADLALGSRYVT-GGGVSDWGLLRRVISRGGSWYARVtlglrvrdLTGG-FKCFDAAVLRAIDlP--TVR--SVGYAFQVELTWRTVRSGFRVVE-VPIVFRD--RTAGSSKMNWRIAREA-VVLVPA-L
OGY43451.1	174	21	57	hypothetical protein A2729_04760 [Candidatus Buchananbacteria bacterium RIFCSPHIGHO2_01_FULL_39_14]	VVIPAYNEA-KTIFEIirkLKDQVSQ--------IITVDDGSTDDTGELAKQAGAKVLTHFL-----nRGQGAALQTGISFA---LAngaEIIVTFDADGQHNPDEIDQVIKPLLLGEVDVVLGSRFLE-SRiknqelRIKNVPLMRFVVLKLAAWFTRLytglkvtdAHNG-FRAFSAKAASLI----EIK--QDGMAHASEIIEQIKKQGLKFKE-VPV-------------------------------
WP_090334208.1	176	25	55	glycosyltransferase [Nitrosomonas sp. Nm51]	VIIPAFNEA-RLILQCLDSVSEslaanqRPGFK--SEVIVVDNNSTDTTAELAKKAG----ARVVFEP--InqiGRAR--NAGAASA---SGDWLLFVDADSLLNPDMIADI-LKMIDSGQYAGCGSaMRMPDspwwgtviLKIWTAVSFTFN------------WASG--AlVVCRaDAFRDVG---GFNL-DLYAADEIDLSRSLKKWGRkrglkFTIL--KRF-PL------------VTSARKLQ-------
WP_013967103.1	178	23	53	glycosyltransferase [Nitrosomonas sp. Is79A3]	IVIPAFNEE-LLILDCLNSIQEsvnanqKPGFT--HEVIVVDNNSTDKTAELAMQAG----AKVVFEPVNqIGRAR--NTGAASA---TGDWLLFVDADSLLNPGMVADILQMIEGGKHVGCGSIMHMPDlpwwgnaaMQLWTALSVTFR------------WASG--AlVVCRaDAFREVG---GFN--QEMFAADeIDLSQLLKKWGhkhglKFTILT-RH--PL------------VTSPRKVQ-------
WP_049783086.1	178	23	53	glycosyltransferase [Nitrosospira multiformis]	IIIPAFNEE-LLIEACLESVHASLaanarhGLT--SEIIVVDNNSTDNTAELARQAG----AQVVFEPVNqIGRAR--NTGAAVA---TGDWLLFVDADSILNPGLLADILRLIEQGRIVGCGSAIKMQDlpwwasgvLQLWTATSVLFR------------WAAG--AlVVSRaDAFRDVG---GFDQ-ELYAADEITLSEKLKKWGRMRGL--QF--PI------------LTkhplesSPRKVQ-------
SEM78418.1	178	23	53	Glycosyl transferase family 2 [Nitrosospira multiformis]	IIIPAFNEE-LLIEACLESVHASLaanakhGLT--SEIIVVDNNSTDNTAELARQAG----AQVVFEPVNqIGRAR--NAGAAVA---TGDWLLFVDADSILNPALLADILRLIEEGRIVGCGSAIKMQDlpwwasgvLQLWTATSVLFR------------WAAG--AlVVSRaDAFQDVG---GFDQ-ELYAADEITLSEKLKKWGRtrglqfPILT--KH--PL------------ESSPRKVQ-------
WP_011380705.1	178	23	53	glycosyltransferase [Nitrosospira multiformis]	IIIPAFNEE-LLIEACLESVHASLaanarhGLT--SEIIVVDNNSTDNTAELARQAG----AQVVFEPVNqIGRAR--NTGAAVA---TGDWLLFVDADSILNPGLLADILRLIEQGRIVGCGSAIKMQDlpwwasgvLQLWTATSVLFR------------WAAG--AlVVSRaDAFRDVG---GFDQ-ELYAADEITLSEKLKKWGRMRGL--QF--PI------------LTkhplesSPRKVQ-------
ODT81580.1	178	23	53	glycosyl transferase [Nitrosomonadales bacterium SCN 54-20]	IIIPAFNEE-LLIEACLESVHASLaanarhGLT--SEIIVVDNNSTDNTAELARQAG----AQVVFEPVNqIGRAR--NTGAAVA---TGDWLLFVDADSILNPGLLADILRLIEEGRIVGCGSAIKMQDlpwwasgvLQLWTATSVLFR------------WAAG--AlVVSRaDAFRDVG---GFDQ-ELYAADEITLSEKLKKWGRtrglqfPILT--KH--PL------------ESSPRKVQ-------
WP_074743682.1	178	23	53	glycosyltransferase [Nitrosospira multiformis]	IIIPAFNEE-LLIEACLESVHASLaanakhGLT--SEIIVVDNNSTDNTAELARQAG----AQVVFEPVNqIGRAR--NAGAAVA---TGDWLLFVDADSILNPALLADILRLIEEGRIVGCGSAIKMQDlpwwasgvLQLWTATSVLFR------------WAAG--AlVVSRaDAFQDVG---GFDQ-ELYAADEITLSEKLKKWGRtrglqfPILT--KH--PL------------ESSPRKVQ-------
SER69594.1	176	25	55	Glycosyl transferase family 2 [Nitrosomonas sp. Nm51]	VIIPAFNEA-RLILQCLDSVSEslaanqRPGFK--SEVIVVDNNSTDTTAELAKKAG----ARVVFEP--InqiGRAR--NAGAASA---SGDWLLFVDADSLLNPDMIADI-LKMIDSGQYAGCGSaMRMPDspwwgtviLKIWTAVSFTFN------------WASG--AlVVCRaDAFRDVG---GFNL-DLYAADEIDLSRSLKKWGRkrglkFTIL--KRF-PL------------VTSARKLQ-------
OGH20052.1	212	26	19	hypothetical protein A3D74_03975 [Candidatus Levybacteria bacterium RIFCSPHIGHO2_02_FULL_37_13]	VVLPTMNRR-NSLQESLKSLYKMDYPIEKLELIIIDNGSTDGTSNLVKKQFTQAKLItLPSNIG---FAPALNVGIRQA---RGKYIFATNDDVIFDKNCLSELVKLAQsDTKIGIVGGKMffynqPNQ-MALPGFRVNIWLGYHPYDFKG---kdqvrEMDVATGgCmlMRKSMLKSIG---LFDE-GfFFCGEDYDLCFRARITGFKTMY-CPTAIVW--HKFLGSGKQSFSALFRHYQGKFRFmlihanffql-
OGY27923.1	211	27	20	hypothetical protein A2802_02615 [Candidatus Woykebacteria bacterium RIFCSPHIGHO2_01_FULL_43_29]	VIIPTYKRK-DKLRQTLESVLNQSI--KDYEVIVVEDGSNDGTKEMVTELRDTHKNLsYFYQTN-KGPAAARNQGISKA---KGEIIAFTDDDCVVPRDWLERLLAGFKKhPEVVGVGGKLEAS--EDELKKNVYARYEKYMSL--KAYgtgekeviggfdcPAGGTNNlAYKKKVLVEVG---GFDE-TFpvAAGEDADIKKRITDKGYKILY-LP-LKVE--HHQDYYFGGFLKQSYNRGIGSYHFqkkwsqppt-
WP_114311632.1	209	16	22	glycosyltransferase [Thermus caldifontis]	AVIVTYNRK-ELLRECLQAVLSQTRPP--DHVLVVDNASTDGTREMLKEEFPQ--VEvlALPEN--QGGAGGFHEGMKRAYEAGYDWIWVMDDDTIPGESALEKLLEAAaclnqKGRAVNAIGSRVLWT-NGKVHPMNSPWSKLRFLPTPCALKevvwiSFVSV--LIKREAIFKKG---LPKKEFFIWNDDVEYFLRL---GNAFL--NPSSIVV--HKTTAiytp-ADSKDGRYYYQVRNRLW-I
OYV43887.1	193	21	38	hypothetical protein B7Z75_06770 [Acidocella sp. 20-57-95]	------------CLEALARLAEPK-----PLVVVVDNGSTDGSLELLKASTRIDRLIASPRN--LGFGPACNLAIAEISSEQPNYIWLLNNDARPDKNALRAMLEVaaA--dPKIGAIGSLIYrDLPMTDLECWGGGRVNLYSGQPHHLTApgkldYITGASVLLRASAMQQVG---GFDEHFFLYWEDADLSLRLQRAGWLLAV-AENSKIF--HA-AsTsakkagtniirYFNDGAIRFY----------
WP_085534024.1	198	14	33	glycosyltransferase family 2 protein [Anaeromassilibacillus sp. Marseille-P3371]	IIVPVYNEE-ATIVRCIDSLLAQTYS--LLEILVIDDGSCDKTRILLEQYGG---QIvLLSQQH-RGVASARNAGLLRA---TGDFILFVDGDDYLEPDCVEQVLQKQQKSGADIVRFSYRLLYPDGHIEEPLSYFQEEQLILKGAfcknIYpyflssirF-NSVWAtLYKRELLAGV----VFPV-HMRTAEDAAFSLEAYTRAQSVLL-VTDI--H--YFYMQTPTGLSKQ------------
PYU95816.1	209	27	22	hypothetical protein DMG08_03930 [Acidobacteria bacterium]	VVILNYN-GKEMAESCLRSVVEST-----YAgkdVILVDNASTDGSAAYLRTRFPDALVLEMSKN--RGVAGGRNYGFREAVHRGNDYILSLDNDTRVDALLIEEL---vaVAEadPRVGVLGPKtYADDGSGRLQCAggritymenVTAEQGSGEIDRGQYDEivdvdYIPGSGFMARREVFERLN---FVDENFHgGGHEDTDFCKRAVQLGYRVVY-VPSAVMW--HR---gsatFGGYTAQRKYWEAINSVY--
WP_067819753.1	201	14	30	glycosyltransferase family 2 protein [Nocardia inohanensis]	VVVPVLNEE-RAILRTLERLAAQD---EIDEIVVVDNGSTDRTLELLEEFAAAEPRLiIVHEPQ-RGLAIARNAGYNKA---GGDIIARTDGDTLVAPDWAETIVAHLESHPETAAVTGLTYY-YDSPVGWLLELGYRIQLRRG--RFrgqvgnv---HGPNhALRRTVWEQIR-----DE-TKTRPdviEDLDLALCLTKRGLRIEL-LPEMKAwtS--ARRRRTDPSAWWRFQLTG-------
WP_048717621.1	213	21	18	glycosyltransferase [Bacillus sp. 522_BSPC]	AIVVTYNRK-QLLMECINKLLSQTLSL--DEIIIIDNASTDNTISEIRSRYSEDEVTilPLEQN--VGGAGGFYEGLKYAKTKGYEWIWILDDDTIPELDCIEQLIetkdKFSNTMKPLLLASRVNWI-DGTLHPMNLPTVKNRDNEKLFMAArngcisirstSFVSL--LINRSLIEQYG---LPIKEYFIWNDDLEYTSRILKNEFGVV--VPKSVVK--HKTKVkytpi--ESAGARYYYEVRNKIW-L
WP_007174702.1	210	24	21	glycosyltransferase [Prevotella bergensis]	AVVVTYNRL-ELLRKVVDGLRKN--NL--SDIIVVNNGSTDGTREWLEAQTNLNVVH--QDN--VGGSGGFYTGIKKAYDEGADWIWCMDDDVVPHPDCLERLLQHTAYPGVGIMSPRRL-S-DGKVFTHEFQKYNFTNPLASLHGRklagrqisditpivgcDFEGP--FISRKVVESIG---LPNKDLFIFCDDTDYCLRAHLAGFKlLY--VPHALMD--KHVFFstdgwaeRNRKKKWKRYYQVRNSAY-L
WP_081406998.1	214	23	17	glycosyltransferase [Acinetobacter brisouii]	VVIVTYNRK-TLLLKCLSSLRVQTIQP--SKILIVDNASTDGTVELLKTKGWLDqsNIQliQLKEN--TGGAGGFATGMQYAFEQGADYVWMMDDDAVPHLTALEEIMRHA-TPEHIYGSLAVNGE-DTAWATTLLVENKTVHLKNQVPELvevqslPFLGF--LTSKEIYQSID---LPDASYFIAADDAEYCMRAQHAGHKIF--VCGqSQIE--HPKSEryeahvlgKKITYlnlvPWKRYYDTRNRLL-I
KKR08636.1	216	29	15	glycosyl transferase family protein [Candidatus Peregrinibacteria bacterium GW2011_GWF2_39_17]	VLIPTYNRA-DILEKCLFALEKQNYLADDFEVVVVNDGSTDRTEEVLQASLDRGlLRLsWFYQRN-SGQGVARNRGLKQA---RGDVILFLGDDIIPHPNLLREHVRVHEvyADLEVAVLGMIDWH-PDLELNEYMNWmvNGSSILGrFGGHQFayeklkrgE-NPDYNfFYTsnlslKRDFLGEA---PFDE-QFDRYgwEDIDLGYRLEKgKGMKLIF-NEQAVGY--HYHPMEESDLARRMELIGQSVHLIhrkhp-
WP_102247774.1	207	21	24	glycosyltransferase [Azoarcus sp. SY39]	VVIPAFNAE-ATLSDCLRAVKAQAFPSDEYEVIVVDDGSTDDTARIASAFG-----CrVISQEN-RGAPSARNRGLAAA---AATWVAFTDADCIPSRSWLRWLVPASEDDAVDAVAG--RTL-GYESRSPAARYV---DLSGGLDAQrhldhpvfPFAPSGNvLYRRSTLERVG---GFEA-RYSTYDACDLHLRLRQAGAdRVRF-EPRALVL--HRHRVGWSGYYRQQRGYGYGLGQFtwrhrdkvsw-
WP_056985861.1	201	19	30	glycosyltransferase family 2 protein [Lactobacillus amylovorus]	VIIPIYNDE-KYLEQCLDSVIKQTY--KNLEIILVDDGSTDRTPEICEQYREKDSRIrVLHKKN-GGVGSSRNAGLAMA---TGDYVLFVDDDDFIYPEETETLYKLLKKNDADVAVGNFQDF-IVKDNVYRYWLNDSQYFEKNYSiqdwfqfEYksnyfnisEVFVVPWgkLYKRSLFEDVV---YpVDK-PI---EDDLTTWKIYLLANKVAY-VNKILSV--HRVRGDSASLKSQ------------
KEA39419.1	170	7	61	UDP phosphate 4-deoxy-4-formamido-L-arabinose transferase, partial [Pseudomonas aeruginosa]	VVIPVYNEE-ASLPELlrrTEAACLELGRA--FEIVLVDDGSRDRSAELLQAAAERDGSaVVAVILNRnYGQHAAILAGFEQS---RGDLVITLDADLQNPPEEIPRLVERAAQG-YDVVGSIRAER-QDSAWRRWPSRLVNLAVQRSTGVAmhDYGCMLRAYRRSIVEAML----A---CRERSTFIPILA----------------------------------------------
WP_062277910.1	211	23	20	glycosyltransferase [Marichromatium gracile]	IIVCTYNRA-DSLAETLDALAALRTPPGcDWEVVVVDNNSSDHTAALLRERAAGWSRLrAVSEPR-QGLSHARNQGIASA---RGEVLLFTDDDVLPEPDWLEQVLDGLERERADACGGYIAPI-WERPPPPWLSARFHGFLAVrmderGPFVFtpgdsp--PYGANmAFRRTVFERVG---GFDV-NrgrkgavLASGEDGELFERVLAAGMRVVW-LPRARVH--HKV-EAFR-LERRYFR--RWRYQNsr-
OKY77390.1	214	22	17	Glycosyl transferase family 2 [Candidatus Methanohalarchaeum thermophilum]	VLVPTFNRK-EKLEKCLDSLIFQDFD-GNYEVIVIDDGSTDGTRSFLEDMGKNNEILkYFFQEN-KGPASARNKGIEES---KGEIIFLTDDDVVMPEDWISSFLPEYNSEEIGGVGGYIEVP-GkeRSVFDDFNEKMSKEKYGIDNKKKvggfesPAGGTGNmSYRKDILNDF----RFDE-KNFRNpggEDADLKKRICNAGYKIVY-LP-VKGE--HLHSLDFFDFIKNSFTRGKGIGSYtkkwnglpk-
WP_014567120.1	195	18	36	glycosyltransferase family 2 protein [Lactobacillus johnsonii]	VIIPVYNDE-EYLAQCLDSVLRQTYS--NLEIILVDDGSTDSTPELCEKYREKYANIrILHKKN-GGVGSSRNAGLEMA---TGEYVLFVDHDDLLSETHIEELYKLLKKNDADIAVGNFNHF-IEEKRAYGIWLKEDDYFEKTYTPeewftveYetvpynmsIIFAVPWakLYKKSLFENIV---Y--P-INARVEDDLTTWKIYLLADKIAY-MNKAIYT--HRIFEN-------------------
WP_057719080.1	195	18	36	glycosyltransferase family 2 protein [Lactobacillus taiwanensis]	VIIPVYNDE-EYLAQCLDSVLRQTYS--NFEIILVDDGSTDSTPELCEKYREKYANIrILHKKN-GGVGSSRNAGLEMA---TGEYVLFVDHDDLLSETHIEELYKLLKKNDADIAVGNFNHF-IEEKRAYGIWLKEDDYFEKTYTPeewftveYetvpynmsIIFAVPWakLYKKSLFENIV---Y--P-INARVEDDLTTWKIYLLADKIAY-MNKAIYT--HRIFEN-------------------
WP_094496014.1	195	18	36	glycosyltransferase family 2 protein [Lactobacillus taiwanensis]	VIIPVYNDE-EYLAQCLDSVLRQTYS--NLEIILVDDGSTDSTPELCEKYREKYANIrILHKKN-GGVGSSRNAGLEMA---TGEYVLFVDHDDLLSETHIEELYKLLKKNDADIAVGNFNHF-IEEKRAYGIWLKEDDYFEKTYTPeewftveYetvpynmsIIFAVPWakLYKKSLFENIV---Y--P-INARVEDDLTTWKIYLLADKIAY-MNKAIYT--HRIFEN-------------------
WP_094498281.1	195	18	36	glycosyltransferase family 2 protein [Lactobacillus taiwanensis]	VIIPVYNDE-EYLAQCLDSVLRQTYS--NLEIILVDDGSTDSTPELCEKYREKYANIrILHKKN-GGVGSSRNAGLEMA---TGEYVLFVDHDDLLSETHIEELYKLLKKNDADIAVGNFNHF-IEEKRAYGIWLKEDDYFEKTYTPeewftveYetvpynmsIIFAVPWakLYKKSLFENIV---Y--P-INARVEDDLTTWKIYLLADKIAY-MNKAIYT--HRIFEN-------------------
WP_094503683.1	195	18	36	glycosyltransferase family 2 protein [Lactobacillus taiwanensis]	VIIPVYNDE-EYLAQCLDSVLRQTYS--NLEIILVDDGSTDSTPELCEKYREKYANIrILHKKN-GGVGSSRNAGLEMA---TGEYVLFIDHDDLLSETHIEELYKLLKKNDADIAVGNFNHF-IEEKRAYGIWLKEDDYFEKTYTPeewftveYetvpynmsIIFAVPWakLYKKSLFENIV---Y--P-INARVEDDLTTWKIYLLADKIAY-MNKAIYT--HRIFEN-------------------
WP_094516788.1	195	18	36	glycosyltransferase family 2 protein [Lactobacillus taiwanensis]	VIIPVYNDE-EYLAQCLDSVLRQTYS--NLEIILVDDGSTDSTPELCEKYREKYANIrILHKKN-GGVGSSRNAGLEMA---TGEYVLFVDHDDLLSETHIEELYKLLKKNDADIAVGNFNHF-IEEKRAYGIWLKEDDYFEKTYTPeewftveYetvpynmsIIFAVPWakLYKKSLFENIV---Y--P-INARVEDDLTTWKIYLLADKIAY-MNKAIYT--HRIFEN-------------------
WP_084696148.1	206	18	25	glycosyltransferase [Salisaeta longa]	VIVPVYNGA-ATLPACLDGLAAQAYPADRFEVIVVDNGSTDATASV-----ARAAGVrVLHETD--IQSsyAARNRGIRHA---KGRLFAFTDADCVPAPDWLMQAVPAFEDATVGAVGGAIT---GGAPRTWVEAQLVAQGWL---SEHgglqhpyrPFPQTANaIYRREVFDAVG---LFEA-RWISGGDADLAWRMQaETNWRVRH-VPAAAVE--HRHRTDLRGLYRQCKKWGHGHANLarryg-
KQM11966.1	209	29	22	hypothetical protein AOA80_05055 [Methanomassiliicoccales archaeon RumEn M1]	IVVCTFNRV-DWLPHCLASLLAQEPRPD--EIIVVDGPSVDGTRELLKEM-EREGLVrLIeqHSLD-GI-SAARNLGLAAA---TGDIVCFVDDDAIAEPGWLQAILDGYEDEEVGGVGGPVhHMD-GRLCMGRNAVSVE----GMWYDESrnepldgcYpVMVGCNmSFRRQPLIDAG---GFDP-YFKYHQDeTDACLGVLRLGYRIRY-QENAVVR--HewcegsYRKDMLRWYIRLRYLWGRNNSYLvrkhfgsm-
RIJ97563.1	204	20	27	hypothetical protein DCC43_10190, partial [Candidatus Brocadia sp.]	ILIPAYNEE-QAISSCLNSLTSLTY--DNKEIFVIDDASTDRTTQIVERF--LHNGVvLVrceKNGG-R--AAALNFGLQKA---TGDVIITTDADTVVPADWLQRFKPHFEEQGVVAVGGAYRAG-NRDKT-LANASSVLDYLLNGIGKKslvpnkl---SGVNsAIRRDALVDLG---GFNE-NAWWCEDSELGWKLSERARIVYD-PSNVVST--QYP-DTWSGIWRRKFYWGYAMG--lkfhgqlp-
SAK63894.1	205	26	26	glycosyltransferase, group 2 family protein [Caballeronia ptereochthonis]	IIVPVFNVE-AYLANCIDSILNQKTSLT-YELIVIDDGSTDGSAAILERYASR-PEVtVVRVTN-GGVAFARNEGIRRA---KGKYLMFVDADDYLPPDCVETLLALAIRDDVDVVQGSYWTV-DVGNTVRGMQVFDE------FVASradasvaeLSGYPWGkVIRRDLFRNV----RFPE-GMAYEDSIVAMILLPLANG--YI-SVKQPVY--YY-RENPRGLTagltkNEKTLDAYWVVSRllsdrrslglp-
WP_087239872.1	190	14	41	glycosyltransferase family 2 protein [Flavonifractor sp. An10]	VIIPVYNVA-PYLERCLDSVAAQTWEN--LEVWLVDDGSTDGSLALceARAEQDPRFQVLRQAN--AGVSAARNRGMDHA---AGQYLQFVDGDDFLPPDATENLVRTAA-aTGADLVVGRFWRVAgGRaAVRGHIREARVLTRQDYAEEM-LKAPANFYygvlwnklYRRSIVEAGH---LrCDT-GVSWCEDFLFNLEYLRRARLIAA-CARPVYC--Y------------------------
PLX15429.1	210	21	21	glycosyl transferase family 2 [bacterium BM706]	IIIPTFNGE-KRVGKTIEALLSQNTDKA-FEIIVVNDGSSDRTLELLEEYNKKDQRViILDQKN-AGPAAARNNGAKHA---QGDIILFTDDDCIPEPDWLEHMIRPFEDTEIAGAKGTYLCA-QKEDVAKFVQIEYEFK-YEKLKRHntidtidtY-----SaAFRKDIFLELG---GYDE-TFPVacAEDFEFSYRMSGKGHKMVF-VPEAKVW--HHHPDTLKWYLQKKYKFAYWRWLAikknpgklk-
WP_086508727.1	214	24	17	glycosyltransferase [Halomonas desiderata]	AVVLTYNRK-ELLQRCLDAIQAQTRPC--DDLLIINNASTDGTREMLDSEKFSA-IKiySLKKN--VGAAGGFNTGFRMAYDNGADLIWMMDDDVIPEPDALEKLLDadallAEKGVGRSYLVSLAYSN-SGRLTNLPQLADKLPSCWPNYLEHglvavgfsTFVSI--LVPRDTLEKYG---LPISSMFIWGEDAEFTLRVTREEPGYL--VGGSKVA--HVRAMeagidilaeTNSVRLSYYRYYVRNNIF-L
WP_012498938.1	188	13	43	glycosyltransferase [Chloroherpeton thalassium]	LIVPTYNRK-ALLAELLETVYRQALPESDYEVVVVSDGSSDGTDELMAGMTAAHPNLrYVRQQN-QGPAAARNNGAKLA---RADIIAFTDDDCHVSPTWLKEILEIFGKKNIVGIQGRTTTV-RE----------ERTPL-----THqienetghPALPTCNaAFRKSAFESIG---GFDC-SfpFAHNEDADLAWRMKKLG-EISF-EPSVHVI--HPPRqDTFKKLA--------------
WP_102652221.1	214	24	17	glycosyltransferase [Halomonas endophytica]	AVVLTYNRK-ELLQRCLDAIQAQTRPC--DDLLVINNASTDGTREMLESERFS-SIKiySLKKN--IGAAGGFNTGFRMAYDNGADQIWMMDDDVIPEPDALEKLLDAnalldEKGVGRSYLVSLAYSN-SGRLTNLSQLADRHPSSWPTYLEHglvavgfsTFVSI--LVPRDTLEKYG---LPISSMFIWGEDAEFTLRVTREEPGYL--VGSSKVA--HVRAMevgidilAETNPARINYYrcYVRNNIF-L
WP_118693985.1	196	18	35	glycosyltransferase family 2 protein [Coprococcus sp. OM04-5BH]	VVIPVYNVE-DYLRQCIESVLKQTLKD--IEIICVDDGSTDSSLSILEEYaaQDNRIKIIKQAN--GGAGAARNNGLRNA---TGDYLSFLDSDDFFEPDMLEEAYNKAEKyKADFVVFnSDQYHMDtQKFVEVPWvlrkkdipPYMPFSYRQLTDNVF-KTFVGWA-WDK-LYNRQF---VLEH-DLwfqeqRTSNDMLFVFSALVVAKRIAI-NDRVLAH--QRRGG-----GAS------------
WP_051328058.1	207	17	24	glycosyltransferase [Desulfatirhabdium butyrativorans]	VIVPAFNSG-RTLPLCLEALERQDLDRGRFEIIVVDDGSTDNTSELVQRF---DVRYvFQDN---RGPASARNAGVDVA---SGQIVLFTDADCMPCPDWVEEMVRPFSDAGIVAVKGRYRTR-QTELVARFVQMEFEDRY---DMLQryeaidm-IDT-YSaAFRKDVFQRMG---GFDT-RFPKanNEDTDLSYRLASAGCKMVF-NPKAVVF--HTHPATLAKYLKIKFWRGYWRMVVyrkyph-
CCY53792.1	196	18	35	glycosyltransferases involved in cell wall biogenesis [Coprococcus sp. CAG:782]	VVIPVYNVE-DYLRQCIESVLKQTLKD--IEIICVDDGSTDSSLSILEEYaaQDNRIKIIKQAN--GGAGAARNNGLRNA---TGDYLSFLDSDDFFEPDMLEEAYNKAEKyKADFVVFnSDQYHMDtQKFVEVPWvlrkkdipPYMPFSYRQLTDNVF-KTFVGWA-WDK-LYNRQF---VLEH-DLwfqeqRTSNDMLFVFSALVVAKRIAI-NDRVLAH--QRRGG-----GAS------------
WP_068689177.1	206	22	25	glycosyltransferase [Culturomica massiliensis]	IVIPVYNAE-NYLKPCLDSVAAQEF--TDYELVLVDDGSADGSGRICDEYAVRDPRIrVIHQSN-GGQAAARNRGIDAA---VGDYVGFCDNDDILHPSIFRVLLENAGAAGAD-------IS-ACSYNERDMRGKVSHDRHSGETLYlsnrggmeQFLSrekmdiyVWTkIYRRTFLEAHG---IRFE-QGRNDEDFLFNYAAFRRAGQTVF-TDRALYT--YNVRDD--SECRMFYRKDLRRYLHntlyr-
CCZ06028.1	212	16	19	glycosyltransferase group 2 family protein [Odoribacter sp. CAG:788]	IVIPVYNAE-NYLKPCLDSVAAQEF--TDYELVLVDDGSADGSGRICDEYAVRDPRIrVIHQSN-GGQAAARNRGIDAA---VGDYVGFCDNDDILHPSIFRVLLENAGAAGTDISACSYNER-DMRGKVSHDRHSGETFYLSNRGGMeqflsrekMDIYVWTkIYRRTFLEAHG---IRFE-QGRNDEDFLFNYAAFRRAGQTVF-TDRALYT--YNVRDDsecrmfYKKDLRRYLHNTLYR----
WP_118773961.1	212	16	19	glycosyltransferase [Odoribacter sp. OF09-27XD]	IVIPVYNAE-NYLKPCLDSVAAQEF--TDYELVLVDDGSADGSGRICDEYAVRDPRIrVIHQSN-GGQAAARNRGIDAA---VGDYVGFCDNDDILHPSIFRVLVENAGAAGTDISACSYNER-DMRGKVSHDRHSGETFYLSNRGGMeqflsrekMDIYVWTkIYRRTFLEAHG---IRFE-QGRNDEDFLFNYAAFRRAGQTVF-TDRALYT--YNVRDDsecrmfYKKDLRRYLHNTLYR----
WP_074883983.1	214	29	17	glycosyltransferase [Pseudomonas argentinensis]	AVVLTYNRK-DLLKRCLEALYAQTRPC--DGIIVIDNASTDGTEQMVLDL-ALADLElyVLSAN--VGASGGFNAGFRMAYQRGADFIWMMDDDVIPSPDALQRLveadeLLAARDIKRSFLLSGAYTQ-EGLVNNSPALDQRRNRIDYECWPAtvelgvmpvaraTFVSI--LVPRATLTEHG---VPISSMFIWGEDTEFTLRVTRDAPGYL--VGASKVL--HLRQEgggainiRTERSPARIRYhrhFVRNELF-I
WP_066700204.1	207	20	24	glycosyltransferase [Chryseobacterium contaminans]	VIVPTYNRV-DTLHKCLQHLEDQSIGIDNYEVIVVDDCSRDETPKFIEDYVSKSKNVkYIRNQT-NLgLATTRNVGIRAS---KGDILMFLDNDLLISNTFLEAHIDLYKANNNKNIAIVsdvtYQPK-DLDKTNFG-RFIQSRAIGYRAEKYmqgidlaDLPSNFFaGggssCKREDAFKIG---LFEE-GLKKygSEDEVFGYRLKKAGIKIVF-CPAAKLI--HFDSNILPHYWRIKY----------
CCY53796.1	191	20	40	glycosyltransferase group 2 family protein [Coprococcus sp. CAG:782]	IIIPVYNVV-KYLDKCIESVCAQTEKS--IEIILVDDESNDGSIDVCRRWaeKDDRIVLIEQKN--AGAGAARNTGLRAA---KGEYLLFLDSDDFFEPDMVEEALKSIEEvNADFVVFGsDTYYMDkDEFIRNPWV---LNKKHVPPYMP-FTHRELtdnvfkvfvgwawdkL-YRTEFVKAHD---LYFQ-EQRTTNDLLFVFSALVLAKKITV-NDKVLAH--QRRGG--------------------
OQX69117.1	208	12	23	hypothetical protein B6A08_06460 [Sorangiineae bacterium NIC37A_2]	VVIPTYNRR-PRLARVLSALAAETFPPERIEVVVVDDGSTDDTVEWLKS--ASFPFsLrVESQAN-SGPAAARNRGVQAA---SSDWILFLDDDVVPDPLLVQAHMENHEKAEGDVVVLGTLSS-LPSYSQPWVAW-EQVQLEKQYAAMvrgdyqptYRQFwTGNaSVRRSRLLEAG---LFDV-TLKRGEDVELGRRLADAGVGYVF-DPRAKGL--HHAERTLKSFCHAHATYG-------
PNV86788.1	205	17	26	hypothetical protein C0610_04890 [Desulfobacteraceae bacterium]	VVIPAYNAA-RTIGEAVAHSLSQTKGSLQVELIVVDDGSTDDTAAVAESAGA-----tVIRQRN-AGPAAARNRGWESA---TGTFICFTDSDCIPTAGWLENLLDGFTDSQVGAVAGSYE---VANPSSWLARWVQQE---VMERHKrmpsfiraF--GSYNvAIPRHVLQATG---GFDP-VYRRasGEDNDLSYRIIKKGWRIAF-RPQARVA--HFHPEKLWRYFMEQYRHGFWRAKLykahp-
OGR89166.1	193	8	38	hypothetical protein A2992_09890 [Elusimicrobia bacterium RIFCSPLOWO2_01_FULL_59_12]	VVTPSYNRK-EFLWEAIDSVRAQTYRD--FEIIVVDDGSTDGTAEQLTERYGKEVRLLSLPH--TGLpASGRNAGIQAA---GGEFVAFLDSDDLWRPQKLERQIAAAERdPKAVLYYAlakkFGASESqGVTMRFHYRPSGRVFNFLIFYNF-IPTLTTL-VRRDVFERVG---FFDTRpDLRAAEDYDMWLR-IARLHRVRY-VPEVLAE--YRLH---------------------
WP_078120346.1	213	23	18	glycosyltransferase [Chromatiaceae bacterium 2141T.STBD.0c.01a]	VVVSARNEA-KTIERCIESLIAQRRSPER--IVMVNDGSTDETAQVLEQFAD-NPQIrVINLES-NIgVPGARNIGVTRS---TSDIIAFTDADAYATPGWLEELLVPFSDPAVVASGGPDRA--PRNDEPFALAVDHSLRSLVGSVKLrvknefapYSPAGCNlAIRRAQFKAAG---GFDE-RLDRrGEEKELIQRLRRDGGKVAY-RDKALIW--HHRRVSPRQFWRQTYLSGKARVDIlrlapdafawp-
WP_008886534.1	196	22	35	glycosyltransferase family 2 protein [Citreicella sp. SE45]	IVVPAFNAA-ETLAETLVSLSAQTFRD--LEIVVVDDGSTDATSRVAeqQARTDGRIRVVRQHN--RGLAGARNSGIAAA---TGEIVGFCDADDRWLPEKLDTHVRHLERsPQVGISYSGSAMIDaDGHRMGHAqrpRLHDVTTALVFKRNP-IGNGSApV-FRREALASIA---WrphfetrrdwvFDE-TFRQSEDIECWLRfCLSTDWIVEG-VPGLLTE--YRVnaGG-----LS-------------
WP_089956027.1	196	22	35	glycosyltransferase family 2 protein [Salipiger thiooxidans]	IVVPAFNAA-ETLAETLVSLSAQTFRD--LEIVVVDDGSTDATSRVAeqQARTDGRIRVVRQHN--RGLAGARNSGIAAA---TGEIVGFCDADDRWLPEKLDTHVRHLERsPQVGISYSGSAMIDaDGHRMGHAqrpRLHDVTTALVFKRNP-IGNGSApV-FRREALASIA---WrphfetrrdwvFDE-TFRQSEDIECWLRfCLSTDWIVEG-VPGLLTE--YRVnaGG-----LS-------------
WP_073386859.1	192	15	39	glycosyltransferase [Butyrivibrio fibrisolvens]	VIVPVFNVK-KYLPECLDSILSQTYS--NFELILIDDGSTDGSGEVCDEYALKDSRIvVIHKEN-SGVADVRNLGISRA---KGEHICFVDSDDIVNPTYIQVLYETAIKEGAGIVMCNYilfkdgETI-PSDIVAKQNAKIVITEKEMEDEAFsaentvkLVIPI-NkIYKKSLVDKIK---Y--P-SGKIHEDAYVYHRLLHEAKQAIL-IPDVLYY--YRKR---------------------
GBD30180.1	210	25	21	Putative mycofactocin biosynthesis glycosyltransferase MftF [bacterium HR32]	VVVPVYNGR-ATLPRCLEALREQTLPAAT--VYVVDNGSVDGTWEWLQEEQVRWERVrVLRETR-RGPAAASNAGIRAA---LGaggvEFVAFVDADCVADRLWLERLIRALDQRKVGAVTGCVQGV-GNetlvGRYTALVAWEASRADAVVDRADytavglag-----CNaCLRASVLKEVG---LFDE-RLWISEDWDLGLRVVEAGWELRY-AAAAVVR--HqYLERTVRELVGRVAKYGPGRPAIlrrhfr-
WP_021646804.1	196	11	35	glycosyltransferase family 2 protein [Bacteroides pyogenes]	VVIPVYNGE-KYLEECIRSVINQTYEN--IEVIVVNDGSTDGSLSIIYRYAEKdgRIKYVNKAN--EGLVKARKTGLSLA---VGKYIQHLDSDDMLCPDAIETLL-MKAEqTGADVVSFPFVFRDgEENEFAEFFDPDeapgveFIRRYLNFKGY-WMVWSKF-HLRSLYSNpIE---TIDI-SF--GEDLVLTTQLLYYSEKVVS-VDIPLLY--YRVLP-----ASMS----------H
WP_027324102.1	196	11	35	glycosyltransferase family 2 protein [Bacteroides pyogenes]	VIIPVYNGE-KYLEECIQSVINQTYKN--IEVIVVNDGSTDGSLSIIYRYAEKdgRIKYVNKAN--EGLVKARKTGLSLA---VGKYIQHLDSDDILCADA-IEILLNKAEqTGADVVSFPFVFRDgEENEFAEFFDPDeapgveFIRRYLNFKGY-WMVWSKF-HLRSLYSNpIE---TIDI-SF--GEDLVLTTQLLYYSEKVVS-VDIPLLY--YRVLP-----ASMS----------H
EFL49176.1	204	18	27	glycosyl transferase family 2 [Desulfovibrio fructosivorans JJ]	--MPAYNAA-GTLADTLDALARQTVDAARVEVVVVDDGSTDATAAVAAARGA-----mVVRQEN-QGPAAARNAGALRA---TGDILVFTDADCTPLPDFLAQLIRPFDDPAVSGVQGAYRTR-QTGLVAR-FAQLEFEDRYLFAAKFpcldlvatYA-----aAFRREVFVAQG---GFDT-SFPVadNEDTEFSYRLCRAGHRLVF-APRAMTY--HRHPASLSGYLRIKARRAYWRLAAcrahpq-
WP_073609334.1	173	28	58	glycosyltransferase [Phormidium tenue]	VVTPTYNRQ-PILEKCLRALENQAvdsalITD--YELIVVDDGSTDGTIEWLQAAAAEFP-HvrlVERHHQG--AAAARNYGVQVA---QGDTIVFVDSDVIMPPGSLQAHaqaladayQR-LGDDRVFTAGRLVNTSNfeqptaeaakvTDFSNA------------------FFDTANLAIARHWLLTAG---LFDTEfSQYGWEDLELGVRLKNLGVTMVK-V-PEAVG-YH------------------------
WP_089845037.1	182	16	49	glycosyltransferase [Lachnospiraceae bacterium XPB1003]	IIVPVYNAE-RYLEDCIESLIGQTY--RDIEIILVDDGSTDGSKEICERYAVSDSRIkLIHKRN-GGAGSARNSGLAAS---KGEYIYFCDSDDTIRPETIERSVDAAVSEDADLVMfGAETVT-GSGDRITNDPYEKKHDYSSIrdpKALFtemkkndeYACCVPFlFMRRTVIR---------S-GFIRTihEDELFTPQIIYSARRAVV-LPDI------------------------------
WP_081458520.1	206	18	25	glycosyltransferase [Desulfovibrio fructosivorans]	VIVPAYNAA-GTLADTLDALARQTVDAARVEVVVVDDGSTDATAAVAAARGA-----mVVRQEN-QGPAAARNAGALRA---TGDILVFTDADCTPLPDFLAQLIRPFDDPAVSGVQGAYRTR-QTGLVAR-FAQLEFEDRYLFAAKFpcldlvatYA-----aAFRREVFVAQG---GFDT-SFPVadNEDTEFSYRLCRAGHRLVF-APRAMTY--HRHPASLSGYLRIKARRAYWRLAAcrahpq-
GBD30179.1	211	20	20	Putative mycofactocin biosynthesis glycosyltransferase MftF [bacterium HR32]	-VVPVRNGR-RTVPQCLEGLLRQSlRPQVIY---VVDNGSTDGTHEWLQEFAVREPSLrVLREAR-RGPAAARNAGIRAA---MAegapEFIAFTDADCVAEPSWLERLREGFEDDRVGAVTGRIRPR-VED--TWVGRYLQITAFDPGRQDRmassvdlaEVIAGGNaCVRTCALEEVG---PFDE-SFLVAQDWDLGLRLLKAGWWIRY-ASGAVVD--HiHWERTAGDLLRLAAKYGCGRPRIlarh-
WP_111968943.1	197	17	34	glycosyltransferase family 2 protein [Campylobacter hyointestinalis]	VIIPCFNAE-RFLKECLESLLNQSFKD--IEVIAINDGSSDDTLKILNKFAsiDSRLVIIDQKN--SGASAARNAGIKLA---KGEYLAFLDSDD-FATKDSLSKFYEAAKkYDADTVFGDfntykdgyttkvNNYICdGGLLDKESFLFDYFTIDKAKSIF-PTMCAKL-IKTSIIkENNL---LFLE-DIFIAEDSNLSAKILWLSQKIVK-INESVYS--YRVGS-----NNSS-----------
KRT76290.1	174	19	57	glycosyl transferase family protein [Armatimonadetes bacterium CSP1-3]	VVIPAYNQA-ATLRRTLEALEQQTLDP--HlyEVIVVDDGSTDETAALVRGRSAED--PrvhLLQHGTNRGRSAARNSGIRTA---RGEIVVLIDSDILVRPDFLAHHLD-AHRRSlhpVLCRGPVVDLP-DgrlpekppalATSPA------------------YLTTANASLPRQELLTAG---LFDENfPAYGWEDFDMGFRLQRRG-LPRV-FRREAVA-FHI-----------------------
KKO19081.1	204	20	27	hypothetical protein BROFUL_02216 [Candidatus Brocadia fulgida]	ILIPAYNEE-QAISSCLNSLTSLTY--DNKEIFVIDDASTDRTTQIVERF--LHNGVvLVrceKNGG-R--AAALNFGLQKA---TGDVIITTDADTVVPADWLQRFKPHFEEQGVVAVGGAYRAG-NRDKT-LANASSVLDYLLNGIGKKslvpnkl---SGVNsAIRRDALVDLG---GFNE-NAWWCEDSELGWKLSERARIVYD-PSNVVST--QYP-DTWSGIWRRKFYWGYAMG--lkfhgqlp-
WP_087365085.1	197	18	34	glycosyltransferase [Cloacibacillus sp. An23]	IIIPAYNVE-QYIRQCLDSIFDGMPEEAAArtEVIVVNDGSTDGTGEILKNYRQTDrqtdLPLiVVEKVN-GGVSSARNAGINAA---SGKYFFFVDGDDYLTPDAVSHLIDYLSTCDADIV-EFDRCK-QNGRMVRHVIRNEKSKdmSGSGQDVWtrcernscFENVVWLrCILRDIIVNNG---IYFY-NGAESEDEEWLPKIFSYARKVEY-FPASIYV--YRIRE--------------------
PIE67502.1	213	26	18	hypothetical protein CSA23_03490 [Deltaproteobacteria bacterium]	VVIPVYNDE-RYIRAAIEALLAQTYPNELTEIIVVDDGSTDGTASIVKEY----DTVkYLHQTN-QGPSAARNFGALEA---HGKLVAFTDSDCEPDPDWLERLVEIFEADKTgrlATVGGVQRGH-PDDNAYARKVDALLCAIGI-VADYvkpnkhisHVSHnaSCNsCYSRNLYMAAG---GFRP-SMFPGEDVDLDKRLKDAGYTVLF-TPQAAVK--HHRADTPKRFKRMLLSYGSSSAYNvithglfriihL
PWM35948.1	204	19	27	hypothetical protein DBX65_04360 [Ruminococcaceae bacterium]	VILPAYNAA-PYLPRCLDSLLAQT--ADSFELIVIDDGSTDGTGDICDAWAARDARIrVIHTQN-RGVSAARNRGLAEA---TGEFILFCDADDTVAPDWIRKLCDRGASDSADmaVCGVtlryPTPTL-PRDvPTDWSGIEGGAMPLS---AVWrlqergLMLTPCNkSFRRAVLEAHG---LrFDE-SLAYCEDEQFilHYLLhAEHGFRVVR-ED---LY--TYEKEHAGSLTRRYVP-GLW-----
WP_026506456.1	198	15	33	glycosyltransferase family 2 protein [Butyrivibrio sp. MC2013]	IIIPVYNTE-KYIRRCVDSVRAQTYPGELTEIILVDDGSTDNSPAILDEIAASDSRIkVLHKEN-GGSSDARNRGIELA---GGDYLGFVDSDDYVSPDMYLHLAEAAARTGAPIVqtGRTEVAE-DGSDMPDIVEIpAAETVVGARDFLFellmhrgd--SSFCTkLVRRDLFDEM----LFPT-G-ILNEDFYLLYHMLPKAGEIVS-LPcrDYHVY--YRTGSNSRK----------------
WP_079483402.1	195	14	36	glycosyltransferase [Lachnospiraceae bacterium]	IIIPAYNAE-KYLVQCLDSVLLSDYAD--IEVVVVNDGSTDNTQGLlsIAEEKDKRIRVIHQEN--GGVSKARNNGLKNA---SGQYIMFLDADDMLTEDALDRILDSIRKEDIDFrafayetFYDDGTRKSeYYDFSEKSCSDTRTADRIMYassRWN-EC-WGKI-YKRSIIDTHeL---KFPE-GVPIGEDFLFVLRYYEKCRTFYI-SNDAILL--YRQHA-----GS-------------
SCJ66950.1	182	28	49	Chondroitin polymerase [uncultured Clostridium sp.]	VVIPIYNV-EKYLAECIDSVLAQTLSG--IEIILVNDGSTDNgPQ-IAESYAERHENIrliHQE-N--AGLSAARNTGLRGA---SGQYVYFLDSDDYIEPDGL-EVIYKEAAdQDCDLVLFDGASF-YDDGDVR----KPNMQYDYQKHY-EYpgvydgedlfaltlpredfrtqVCLQLVKRQTLLDLGL---TFLE-GiIHEDQYYTFALMLQCRRVKIVR---KI-VY--HRR----------------------
WP_035767382.1	196	17	35	glycosyltransferase [Butyrivibrio sp. NC2002]	IIIPAYNIE-DLIVRCLESVCSQTYPKELLEIIVVDDGSTDNTFDKAKEYARdkRNVTVLHKEN--GGSSSARNYGLSKA---TGDYIGFVDSDDYVDPHMYEELMKAAMMf-DAPMVQASRDEIDeNGQKLPDVCIPPEKitviSGKEHLKTL-LLHtgDASF-CTRitkaELFKKdYG---RFPE-N-ELNEDFYLMIKMISDVDKLVI-LPGqyYHVF--YRLGS-----NS-------------
WP_027891371.1	170	16	61	glycosyltransferase family 2 protein [Meiothermus chliarophilus]	-IIPAYNEA-RFIAGVvleTRRYVS--------EVIVVDDGSTDRTAQLAQAAGAT-----VIRQPRnMGKAEALNAGFRAA---RElnpDVVVCLDGDAQHDPADIPDVIAPVLEGGADVVIGSRFLE-KrSDIPGW---RIVGQHTLTFVTNLtsgikttdSQSG-FRAFSPLALRAL----RFH--TGGLGVESEMQFHIQKAGLKVAE-API-------------------------------
WP_119280149.1	170	16	61	glycosyltransferase family 2 protein [Meiothermus roseus]	-IIPAYNEA-RFIAGVvleTRRYVS--------EVIVVDDGSTDRTAQIAQAAGAT-----VIRQPRnMGKAEALNAGFRAA---RElnpDVVVCLDGDAQHDPADIPDVIAPVLEGGADVVIGSRFLE-KrSDIPGW---RIVGQHTLTFVTNLtsgvrttdSQSG-FRAFSPLALRAL----RFH--SGGLGVESEMQFHIQKAGLKVAE-API-------------------------------
WP_119314404.1	170	16	61	glycosyltransferase family 2 protein [Meiothermus terrae]	-IIPAYNEA-RFIAGVvleTRRYVS--------EVIVVDDGSTDRTAQLAQAAGAT-----VIRQPRnMGKAEALNAGFRAA---RElnpDVVVCLDGDAQHDPADIPDVIAPVLEGGADVVIGSRFLE-KrSDIPGW---RIVGQHTLTFVTNLtsgikttdSQSG-FRAFSPLALRAL----RFH--TGGLGVESEMQFHIQKAGLKVAE-API-------------------------------
RIH82768.1	170	16	61	Undecaprenyl-phosphate mannosyltransferase [Meiothermus roseus]	-IIPAYNEA-RFIAGVvleTRRYVS--------EVIVVDDGSTDRTAQIAQAAGAT-----VIRQPRnMGKAEALNAGFRAA---RElnpDVVVCLDGDAQHDPADIPDVIAPVLEGGADVVIGSRFLE-KrSDIPGW---RIVGQHTLTFVTNLtsgvrttdSQSG-FRAFSPLALRAL----RFH--SGGLGVESEMQFHIQKAGLKVAE-API-------------------------------
RIH87289.1	170	16	61	Undecaprenyl-phosphate mannosyltransferase [Meiothermus terrae]	-IIPAYNEA-RFIAGVvleTRRYVS--------EVIVVDDGSTDRTAQLAQAAGAT-----VIRQPRnMGKAEALNAGFRAA---RElnpDVVVCLDGDAQHDPADIPDVIAPVLEGGADVVIGSRFLE-KrSDIPGW---RIVGQHTLTFVTNLtsgikttdSQSG-FRAFSPLALRAL----RFH--TGGLGVESEMQFHIQKAGLKVAE-API-------------------------------
WP_081630228.1	191	14	40	glycosyltransferase family 2 protein [Acidobacteriaceae bacterium KBS 89]	VVIPAFNAQ-DTLDDTLLSVRRQTYRN--LEILVVDDGSTDGTpsLVLAHARDDQRVMLLRQEN--AGVAAARNKGWQAA---RSDFIAFVDADDLWELSKIEKQVSLLLAgGERmGLVYTWWVVIDqHNRIRYAvdgLGIEGDVLAQILLGNF-VGHGSSpV-IRRQALIAAG---GFDS-GLRSAGahgceDMLLYYR-IAMRYRFGL-IPEYLTG--YRV----------------------
WP_078960248.1	192	12	39	glycosyltransferase [Streptomyces sp. NRRL WC-3618]	VVVPVFNVE-HYISPCLESLLNQDLS--NVEIIVVDDGSTDLSGTIAEGWRRKDDRInIISQSN-AGLSAARNAGFRAA---RGKYLAFCDSDDVVTPTGYRHLVETLEATGSDMASG--DVR-RMDSSGVRPHSGYEDVFAQGRRRtHirhdvslvRDRMAWNkVFRRSFWDAKN---LaF---SLPAYEDAPVMIRAHIEASAVDV-LPEIIYY--WRIRE--------------------
WP_090037277.1	193	14	38	glycosyltransferase family 2 protein [Lachnospiraceae bacterium YSD2013]	VVIPVYNVK-KYLNDCLESVAKQSYRN--YEAILVDDGSSDGSELICDEWckKDSRVKVIHKEN--AGVSAARNDGIAAS---NGEYIAFLDSDDLLQPDAL-KILYDCAKrNDSDMVIGNIRWVSeEGAPLKDEPLDRSEETYISREDF-WCRfcdepdfvmvCGSL-YDRHIFDTIE---FFDG---KINEDYAIQRYIVERTKKIMF-CNKIIYN--YRMSS-----NS-------------
WP_083868161.1	192	14	39	glycosyltransferase family 2 protein [Halomonas smyrnensis]	-IVPVFNGE-AYLRRCVESVIfaANGYS---VEIIIVDDGSTDGSAEIAQALAatESCIRYVHQVN--HGPSAARNKGLALA---TGDYIGFLDCDDCIAPSYMYKLIDACEKsPDI-IVFGyEEKLLDgSSIVYAPSVNCHRNEADQLLANV-SLDRELF-WfswtklfRAELLSGV----NFDE-EMRLGEDTIFNIQAVAKAKLIIR-VPDVLYS--YYETP-----GS-------------
WP_091662165.1	195	13	36	glycosyltransferase family 2 protein [Micromonospora auratinigra]	VVIPVYNAA-KTLRRCLDAVAAQTHP--PAEVLVVDDGSTDGSAELAAAAGVR----vLVQPVN-RGVSAARNAGVAAS---TGEVVFFVDSDVALAPDAIGNALAVLaADPDCGCVYGVYAPV-PLIDDGPVERYRVLH-------LHtaltravgPVDTAVFalaAVPRAVLRDLG---PFDE-NLRSAEDDEYSERLLTR-YRIRL-TDTVVGR--HDEADRLLPLLGEQYR---------
OGQ72639.1	169	6	62	UDP-4-amino-4-deoxy-L-arabinose-oxoglutarate aminotransferase [Deltaproteobacteria bacterium RIFCSPLOWO2_12_FULL_60_16]	-VIPLYNEA-ITVERLherLSGTLESLGKS--YEVIYVDDGSTDGTTEILQALHKKDHKVKVIVFNRnYGQHAAVVAGFERA---AGEVIVTLDGDLQNPPEEIPRLLAKIEEG-YDVVGGWRMGR-QDSIVRRALSYMINQVTSLIVGVKmkDYGCMLRAYRREVAERIC----Q---CQEISSFIPVLA----------------------------------------------
WP_008862989.1	180	11	51	glycosyltransferase family 2 protein [Barnesiella intestinihominis]	VVIPVYNVS-KQLEKCLDSVVAQTFPD--IEIIVVNDGSTDNSPEIIARYADKdsRIVVIDKSN--EGLAYARKSGIEAA---QGEYIQHLDGDDFLEPDA-IELLYNKAIeDAADMVvfpfwfdYVDEKKKRsSRPAPGVYDSVSFFQSMAFCRNY-WSVCSYL-HKRSLYAEVH----FEK-GLNYGED------AYLASQLTYF-ANKIVV----------------------------
WP_021891752.1	180	11	51	glycosyltransferase family 2 protein [Bacteroides sp. AF14-46]	VVIPVYNVG-KQLEKCLDSVVAQTFPD--IEIIVVNDGSTDNSPEIIARYADKdsRIVVIDKSN--EGLAYARKSGIEAA---QGEYIQHLDGDDFLEPDA-IELLYNKAIeDAADMVvfpfwfdYVDEKKKRsSRPAPGVYDSVSFFQSMAFCRNY-WSVCSYL-HKRSLYAEVH----FEK-GLNYGED------AYLASQLTYF-ANKIVV----------------------------
OKZ45593.1	180	11	51	hypothetical protein BHV68_00235 [Bacteroidales bacterium 43_8]	VVIPVYNVG-KQLEKCLDSVVAQTFPD--IEIIVVNDGSTDNSPEIIARYADKdsRIVVIDKSN--EGLAYARKSGIEAA---QGEYIQHLDGDDFLEPDA-IELLYNKAIeDAADMVvfpfwfdYVDEKKKRsSRPAPGVYDSVSFFQSMAFCRNY-WSVCSYL-HKRSLYAEVH----FEK-GLNYGED------AYLASQLTYF-ANKIVV----------------------------
WP_079654418.1	174	7	57	glycosyltransferase family 2 protein [Thermocrinis minervae]	VVIPAYNEK-DNIPILyerLKKVLESLGED--YEIIVVDDGSTDGTFEVLQELAKVDEKLKVVRFRRnYGQTAAMYAGFEYA---KGDVIITMDADLQNDPEDIPKLLEELKKG-YDIVSGWRKDR-KDPFLSRvLPSMIANWIISKVTGVHlhDYGCTLKAYRSEVVKDLE----L---YGDMHRFLPALTKR--QG----------------------------------------
WP_047121199.1	213	15	18	glycosyltransferase family 2 protein [Arthrobacter sp. YC-RL1]	IVVPGYNEE-VVISNCVESILRSNY--EDFEVILVDDGSTDGTARIMDEWAAKDHRVsSISQPN-AGKGAALNRGFAAS---DGEVVLFVDADGVFGEETINEMLKGFNHPSIGAVCGDDRPV-NLNTVQTRLLTVISH-LGTGVVRRalaligclPIVSGNSgAFLRSALNVAG---NLDE-RII-GEDLELTWRIHKAGYQVNF-APRALVY--AESPSTLRGLWKQRVRWARGLLQTikihk-
WP_113606683.1	213	15	18	MULTISPECIES: glycosyltransferase family 2 protein [Micrococcaceae]	IVVPGYNEE-VVISNCVESILRSNY--EDFEVILVDDGSTDGTARIMDEWAAKDHRVsSISQPN-AGKGAALNRGFAAS---DGEVVLFVDADGVFGEETINEMLKGFNHPSIGAVCGDDRPV-NLNTVQTRLLTVISH-LGTGVVRRalaligclPIVSGNSgAFLRSALNVAG---NLDE-RII-GEDLELTWRIHKAGYQVNF-APRALVY--AESPSTLRGLWKQRVRWARGLLQTikihk-
WP_056430835.1	213	23	18	glycosyltransferase family 2 protein [Arthrobacter sp. Leaf69]	IIVPAYNEA-TVIENCVRSIQLTRY--DRYEVILVDDGSTDNTAELMAGLAAGDARIrVLTQAN-AGKGAALNLGIRNA---TGDVLMFVDADGIFSRYTVEKMLQGFEDGRTGAVCGDDRPV-NLNRAQTRM-LAFISHVGTGMVRRaltvigclPIVSGNIgAFPRKVVEEIG---PFRE-D-TVGEDLELTWRVHKAGYRVVF-TPRALVY--AESPSTIRALWRQRVRWARGLLQTmavhkgmignlrh-
WP_083501695.1	189	7	42	glycosyltransferase family 2 protein [Microbispora sp. GMKU363]	VVVPCYNAA-KTLRLCLESVLAQTLRP--DEIVVVDDASTDGSAAIAEELGCRVVRL--PEN--RGVSAARNAGTDAT---TGDVVFFLDSDVALRPDAVANAMEILSRdPEVGCVHGvyDTEPLIdDGPVERYRILHAVYWRSRHLGEV---NSVVFAlaaIRRDVLLAVG---RFDE-RLRDCEDVEYSSRLAVR-TRIVL-TDTVVGR--HDDG---------------------
CDD04791.1	151	19	80	putative uncharacterized protein [Ruminococcus sp. CAG:382]	IIIPCYNVE-EYLQKCLDSVLGQksDY---RFHVTCIDDGSTDGTADILKKYASHDD-FtVIHQKN-SGLSAARNAGLSAS---RGKYIMFVDSDDYLPENAVSRLLEAAYANGADIVEGAR-----TDCLQN----------GVICRRHrhpsgkmnPHSlygTTWGkIYRRELFEDicfpVG---YWYE-DSVISQ----------------------------------------------------
PWM37330.1	196	11	35	hypothetical protein DBX65_01365 [Ruminococcaceae bacterium]	IVIPAYNAA-ATVGRCLDSLLAQTY--RDFELIVVDDGSTDSTAQIVSAYAERDNRIrLIRQEN-AGVSAARNVGLDAA---RGDLIGFTDSDDAISPEFLEALLP-LYAPGVLPVADIERSD-GDGSALASLPPAITLDPTRLPEDYfcgtlgqgIAFTVCNkLFSAALLRDAC---LrFAE-ELSVGEDMLFVFRYLRRCREVCF-TRRAVYR--YNIAEN-------------------
WP_074567120.1	175	12	56	glycosyltransferase [Streptococcus equinus]	VIVPVYNAQ-EHLSDCLDSLLNQTLESDSYEIILLNDGSKDMSTEICERYAKQYSNIvFVNKEN-EGVSKTRNLGIQKA---KGDFVAFVDNDDLVETDYLEKLYTAISKSNADAV------------FSGYIRMTYSGKVLFKESL-sqtdwakyIVMAPWAkLYRRQVLldNRIE---FFD---YGIGEDVAFNLQFLAKTKNI-----DIISY---------------------------
KPL12073.1	174	6	57	hypothetical protein AMJ85_02070 [candidate division BRC1 bacterium SM23_51]	-VIPVFNER-DSIGEVcqrCATIASRLDLS--YEIIAVDDGSTDGSEAVLRDRATSDPQLIVLVFRRnFGKSAALAAGLEMA---RGDMIVTLDADLQDNPDELPVLLEAFRAG-NDVVVGWKQRR-RDSFVRIAASRVFNRLVSALAGRRfhDCNSGFKALRRDTVAHLD----L---YGERHRFVPLLAHW--KG---------------------------------------F
WP_107031560.1	158	12	73	glycosyltransferase family 2 protein [Duncaniella muris]	VITPVYNRA-DCVLRCLESVALQIGcgRN--IEHVVVDDGSKDNTAELIRTFADgkpHVKTVFFDQN--RGTNAARNAAVSQA---TGDYCVILDSDDYFTPDACDVILNAIESfHDARYFMftrddRTEEFDSrYGQGAIVRYGYSDVLNGEVAGDY-IH----V-IPRNLLEKY----PFDE-GLKI------------------------------------------------------
KYH39349.1	208	15	23	hypothetical protein AYL28_000730 [Candidatus Bathyarchaeota archaeon B23]	VVVPTYNEA-GTIGELleaLESL--GLD----LHILIVDDGSTDGTIELVEEASQRHGNITLLERGEkLGLGSALRDGLKAA---LNlgvELVVTMDADLSHGPLELPRLLERASPHR--IVLGSRYVE-GGRIEGWSLYRRLVSWVANLLARLltgvpsrdSTTG-YRCYGVEAVRGILP--HLR--GVGYELQVEILSVAHRLGVEIVE-APITFRE--RRRGRSKLGLGEMWSF-LRTLLR-L
WP_051421605.1	210	13	21	glycosyltransferase [Paenarthrobacter nicotinovorans]	VIVPGYNEA-VVITKCVESILASRYL--RLEVILVDDGSTDSTAEIMKGLSQQyDRVRFLSQaN--AGKGAALNHGIAAA---HGDILMFVDADGIFAPDTLMNMLEGFDHPKVGAVCGDDRPV-NLDRIQTMMLAVLSHvgTGLVRRALSllhclpIVSGNIGAFRSDLVRqlgGFH--------EDTLGEDLELTWRVYKAGFRVRF-QPNALVY--AESPSTMGGLWRQRVRWSRGLLQ-T
KFC67369.1	190	13	41	Glycosyl transferase family protein [Devosia sp. LC5]	VVIPAYNAE-STLPETVESVRAQTLSS--IEIIVVDDGSIDGTRSIAQqlAAQDQRIRVISTRN--GGVAAARNVGIEAA---GAVYIAPIDADDLWHPDKLSRQLAILEArPEVSLVYSSRRNIDeGGAVTKTIARATLAGWAChrltAFNAV-GNGSAIM-FRRADALQVG---GYDR-RLKErgaqgCEDFLFQIRLAMLGEI-AL-DDGYLVG--YR-----------------------
WP_106148513.1	197	14	34	glycosyltransferase family 2 protein [filamentous cyanobacterium Phorm 46]	VIIPAYNAE-KFIAKTLESVLSQTYQN--IELLVVDDGSTDTTAEIVKSFGQKDSRIIllQQSN--TGVAAARNLAIEKS---HGEYIAPIDADDIWYPQNLEKQIECLtKSePTVGVVYSWSVDINeQDLLTGGFYNStiaGEVYQALVYKYF-IGNaSSSL-IRRACFEKIG---GYNC-KLKAenaqgCEDWELHLR-IAEHYQFKV-VPEYLVG--YRQIA-----SSMS-----------
WP_081917381.1	190	13	41	glycosyltransferase family 2 protein [Devosia sp. LC5]	VVIPAYNAE-STLPETVESVRAQTLSS--IEIIVVDDGSIDGTRSIAQqlAAQDQRIRVISTRN--GGVAAARNVGIEAA---GAVYIAPIDADDLWHPDKLSRQLAILEArPEVSLVYSSRRNIDeGGAVTKTIARATLAGWAChrltAFNAV-GNGSAIM-FRRADALQVG---GYDR-RLKErgaqgCEDFLFQIRLAMLGEI-AL-DDGYLVG--YR-----------------------
WP_012993218.1	160	14	71	glycosyltransferase family 2 protein [Mageeibacillus indolicus]	VILAAYNTE-ELLEECILSVLHQTRSVD--EFIIIDDGSTDRSPELIDKYAAEYPNIiVFHQRN-AGQAAARNVGLAHA---SGNYIGFIDSDDWYDPNFIEELYNCCQKNGASIACASMSDY-YSKQNVVRHDYAANTdPFKI------TPSVCNkLFRRNligdlrfqegrWYEDFG---FFHA-LLSRN-----------------------------------------------------
WP_087171922.1	196	20	35	glycosyltransferase family 2 protein [Gemmiger sp. An120]	IIVPVYNGQ-DYLDRCLDSIAAQTV--RDFACILVDDGSTDGSADLCRARAARDGRFvLLQKQN-GGVCSARNAGLDAA---RGEYVLFCDQDDLIDPHTLEYALTMQQSAPEGFVLWNM-TR-SRETYDQSLATPLEyavRPLGQMQVLHrgsmiFV-HVWNkLFRRARIEQLH---LrFDE-RLGHvstygGEDEDF-VRRYMEGMApdtpLAY-STAAR-Y--YHARDNLAA----------------
WP_032536217.1	153	20	78	MULTISPECIES: glycosyltransferase [Bacteroides]	VVVPVYNTE-LFLEECLHSLEKQTLTD--IEIILVNDGSTDNSGELLREYAGKDARCvyVEQAN--QGLSAARNTGIEHA---SGHYLAFLDSDDWLAEDALQVLCAIAMKtR-TDIVSGNTLAVHpDGQV---RSWERRSRELFAAGTV-VSGSTYFSrvmdcrcyvpmvynylYRRDFIEQNG---F--------------------------------------------------------------
EFR55708.1	153	20	78	glycosyltransferase, group 2 family protein [Bacteroides fragilis 3_1_12]	VVVPVYNTE-LFLEECLHSLEKQTLTD--IEIILVNDGSTDNSGELLREYAGKDARCvyVEQAN--QGLSAARNTGIEHA---SGHYLAFLDSDDWLAEDALQVLCAIAMKtR-TDIVSGNTLAVHpDGQV---RSWERRSRELFAAGTV-VSGSTYFSrvmdcrcyvpmvynylYRRDFIEQNG---F--------------------------------------------------------------
WP_012725385.1	209	14	22	glycosyltransferase family 2 protein [Beutenbergia cavernae]	VVVPAYNEA-VVIVHCVRSILRSDHPH--LEVVCVDDGSTDDTFALMEGLAAEhpsVRAIRQ-AN--AGKGAALNTGIAAA---HGEVLLLVDADGLFRPDTVTELLRGFRDERVGAVCGNDRPV-NLDRVQTKLLALISHvgTGLMRRALDvvhalpIVSGNVGAFRRDVLErtgPFR--------TDTLGEDLELTWRIYERGYRVTF-APRALVH--AESPSTLRGLWRQRVRWARGLLQ-T
AKT34331.1	203	15	28	Glycosyltransferase involved in cell wall biogenesis [Pyrobaculum sp. WP30]	VVVPTYNEA-ENLSELlerLDRALAGRS----YEVVVVDDGSPDGTAEVARRLAGRYP-VRVLVREGrRGLSSAVVEGARAA---GGDVVVVMDADLQHPPELVPKLAEAA--GRGCLAVASRYVK-GGGVEGWPWHRRLVSRGAVLLARIllpearavrdAVSG-FFAYRRECVAN------VK--PTGlYKILLDVLVQCKPR--CVVE-VPYLFGL--RTRGRSKLGTRHIADY-LRQVLA-L
WP_009617679.1	170	7	61	undecaprenyl-phosphate 4-deoxy-4-formamido-L-arabinose transferase [Pseudomonas sp. M1]	VVIPVYNEQ-DSLPELlrrTDAACRQLGRA--YEIVLVDDGSRDGSAELLQEAAEApDSHVLAVILNRnYGQHAAIMAGFEQC---RGDLVITLDADLQNPPEEIPRLVEQAARG-YDVVGTVRGNR-QDSALRRWPSRLINLAVQRSTGVAmsDYGCMLRAYRRGIVKAML----A---CRERSTFIPILA----------------------------------------------
WP_043272305.1	170	7	61	MULTISPECIES: undecaprenyl-phosphate 4-deoxy-4-formamido-L-arabinose transferase [Pseudomonas]	VVIPVYNEQ-DSLPELlrrTDAACHQLGRA--YEIVLVDDGSRDGSAELLQEAAEApDSHVLAVILNRnYGQHAAIMAGFEQC---RGDLVITLDADLQNPPEEIPRLVEQAARG-YDVVGTVRGDR-QDSALRRWPSKLINLAVQRSTGVAmsDYGCMLRAYRRGIVKAML----A---CRERSTFIPILA----------------------------------------------
WP_069861906.1	170	7	61	undecaprenyl-phosphate 4-deoxy-4-formamido-L-arabinose transferase [Pseudomonas humi]	VVIPVYNEQ-DSLPELlrrTDAACRQLGRA--YEIVLVDDGSRDGSAELLQEAAEApDSHVLAVILNRnYGQHAAIMAGFEQC---RGDLVITLDADLQNPPEEIPRLVEQAARG-YDVVGTVRGNR-QDSALRRWPSKLINLAVQRSTGVAmsDYGCMLRAYRRGIVKAML----A---CRERSTFIPILA----------------------------------------------
WP_074977553.1	170	7	61	undecaprenyl-phosphate 4-deoxy-4-formamido-L-arabinose transferase [Pseudomonas citronellolis]	VVIPVYNEQ-DSLPELlrrTDAACRQLGRA--YEIVLVDDGSRDGSAELLQEAAEApDSHVLAVILNRnYGQHAAIMAGFEQC---RGDLVITLDADLQNPPEEIPRLVEQAARG-YDVVGTVRGNR-QDSALRRWPSKLINLAVQRSTGVAmsDYGCMLRAYRRGIVKAML----A---CRERSTFIPILA----------------------------------------------
WP_011773511.1	210	13	21	MULTISPECIES: glycosyltransferase [Micrococcaceae]	VIVPGYNEA-VVITGCVESILASRYL--RLEVILVDDGSTDETASIMEGLAQQyDRVRFLSQaN--AGKGAALNCGIAAA---LGDILMFVDADGVFAPDTLIHMLEGFDDPKVGAVCGDDRPV-NLDRLQTMMLAILSHvgTGLVRRALSlmnclpIVSGNIGAFRSDLVRelgGFH--------EDTLGEDLELTWRVYKAGYRVRF-QPKALVY--AESPSTMGGLWRQRVRWSRGLLQ-T
WP_087170799.1	154	12	77	glycosyltransferase [Gemmiger sp. An120]	VIVAIYNIQ-EYLPQCIESLAAQTY--ENLEVFLVDDGSTDASGRLCDEWAARDKRFkALHKAN-GGQSSARNMGLDRA---SGDYIGFVDGDDFVDRDMYKYLVESAMEFSAQTVMSAVRTQ-DDaGKQGWLFVDGFQQRQVIDKeTVMrllmndirISSSPWNkLYHRSLFD---------------------------------------------------------------------
OUM95720.1	165	19	66	hypothetical protein A9Z00_11180 [Thermobacillus sp. ZCTH02-B1]	VIVPVYNAE-AHLERCIASLRAQT--LEACEFIFVNDGSTDGSRRILERHAALDDRIvLIDQPN-RGVSAARNAGLDAA---IGRFVGFVDADDEVAPEWFETLREAAERHGCDAVIA---EF-AEGEAGRTVSF----PFPAGVRLDrdyirshllpnFVESdrcnaVWNkLYRMSAVRRSG---ArFPN-RVALGEDGWFN-----------------------------------------------
WP_028611936.1	167	19	64	glycosyltransferase [Paenibacillus harenae]	VIVPVYNAE-PYIGECLQSLLAQT--LQDCEFICVNDGSTDRSASIIEQFRQMDSRViLINQSN-QGVSVARNTGLEDA---AGEYVGFVDADDFIEPDMYERLYNAAGKGDCDVVLSNFESE-LDGYRIVT-----QYPFPTDVVLHsdfirrevlptflrtdQLNTACNkIYRTSLIQKYK---IrFPE-NVTLGEDGLFN-----------------------------------------------
ETI81752.1	197	16	34	family 2 glycosyl transferase [Varibaculum cambriense DORA_20]	VLVPIYNVE-KYLSECLGSLAAQDFKQ--AEFICINDGSTDGSRDIIEHFlnKDSRFKVIDKEN--SGYGASMNRGLEAA---QGDYVAILESDDFMEEDALSK-LHQAISsTGADVVKANfwMYWSIpIKRNEFFEAIPGRKSEKiadpasdpFIFYTK-PSIWSAI-YRKSFLdtEKIS---FLET-PGASFQDTSFTFKVWASTHKVYY-LHDAFVH--YRQDN-----ENSS-----------
WP_058178860.1	170	7	61	undecaprenyl-phosphate 4-deoxy-4-formamido-L-arabinose transferase [Pseudomonas aeruginosa]	VVIPVYNEE-ASLPELlrrTEAACLELGRA--FEIVLVDDGSRDRSAELLQAAAERDSSaVVAVILNRnYGQHAAILAGFEQS---RGDLVITLDADLQNPPEEIPRLVERAAQG-YDVVGSIRAER-QDSAWRRWPSRLVNLAVQRSTGVAmhDYGCMLRAYRRSIVEAML----A---CRERSTFIPILA----------------------------------------------
WP_073700204.1	170	7	61	undecaprenyl-phosphate 4-deoxy-4-formamido-L-arabinose transferase [Pseudomonas aeruginosa]	VVIPVYNEE-ASLPELlrrTEAACLELGRA--FEIVLVDDGSRDRSAELLQAAAERDRSaVVAVILNRnYGQHAAILAGFEQS---RGDLVITLDADLQNPPEEIPRLVERAAQG-YDVVGSIRAER-QDSAWRRWPSRLVNLAVQRSTGVAmhDYGCMLRAYRRSIVEAML----A---CRERSTFIPILA----------------------------------------------
WP_083556879.1	170	7	61	undecaprenyl-phosphate 4-deoxy-4-formamido-L-arabinose transferase [Pseudomonas aeruginosa]	VVIPVYNEE-ASLPELlrrTEAACPGLGRA--FEIVLVDDGSRDRSAELLQAAAERDGSaVVAVILNRnYGQHAAILAGFEQS---RGDLVITLDADLQNPPEEIPRLVERAAQG-YDVVGSIRAER-QDSAWRRWPSRLVNLAVQRSTGVAmhDYGCMLRAYRRSIVEAML----A---CRERSTFIPILA----------------------------------------------
WP_095555755.1	170	7	61	undecaprenyl-phosphate 4-deoxy-4-formamido-L-arabinose transferase [Pseudomonas aeruginosa]	VVIPVYNEE-ASLPELlrrTEAACLELGRA--FEIVLVDDGSRDRSAELLQAAAERDGSaVVAVILNRnYGQHAAILAGFEQS---RGDLVITLDADLQNPPEEIPRLVERAAQG-YDGVGSIRAER-QDSAWRRWPSRLVNLAVQRSTGVAmhDYGCMLRAYRRSIVEAML----A---CRERSTFIPILA----------------------------------------------
WP_097593468.1	196	16	35	glycosyltransferase family 2 protein [Rhizobium sp. J15]	VVVPAFNAS-PFIERTLVSATSQTYRA--LEIIVVDDGSTDDTARLVERAavNDARIRLLRTAN--RGVAAARNTGIEAA---SGPYVAFLDADDLWHPAKIEKQVEALERlPDqWAAVY--VLHHFiNLDDELYGLGPSHLARGYIYARH-LTYkyvgngSSLL-VRRQAALEIG---GFDS-SYVAAGiggceDLDFELRLAARYCI-EY-VPERLLG--YRKYA-----GNMS----------S
CDD29022.1	151	14	80	putative uncharacterized protein [Firmicutes bacterium CAG:94]	VVVPVYNV-EKYLEKCVDSILAQTEPD--FELLLVDDGSTDGs-GRLCDKLAEKDRRVrvi-HQKN--QGLGGARNTGIQQA---QGDWLLLVDSDDWIEPQTLEKTMEAGLRe-EADLVMFAYRSV-DEGGRILQTYMENapkdrglplEQQPTLLLTS-PSAC-IRLYRRELLERTG------------------------------------------------------------------
WP_114519680.1	189	20	42	glycosyltransferase [Eggerthella lenta]	IVVPAYNG-ERHIRQCVESVLAQTMPD--FELICVNDGSTDGTGSLLDDMAARDDRMrviHQE-N--KGEGAARNAGLDVA---RGRYLAFFDADDFAEPQLLEKVVRR-AEeTGADVVayrvdsYNDETgetlpmpwSL-DADAFPADRVSSPGDNPDKLFYafQ-NWTWNKL-FRSSFVQASG---LRFH-EVQRSADLYFVCCALAQADRVAT-VDEV-LY--HYR---------------------V
WP_099901402.1	160	13	71	MULTISPECIES: glycosyltransferase [unclassified Streptomyces]	VVVPVYNVE-RYLVECLDSIAAQTF--DDFECVMVDDGSTDTSAELAAEYAARDPRFrLVQQAN-QGLGAARNTGVRHLGD-GTEYLAFVDSDDVVPPHAYRLMIDTLDGTGSDFAAGNVlrlRTA-GLEPSHVHLRPFAKTRLRTHVSELpslvtdr---TAWNkVYRRSFYEAAG---LdYPE-----------------------------------------------------------
WP_082382008.1	212	29	19	glycosyltransferase family 2 protein [Ardenticatena maritima]	VIVPLWNGA-AFIGDCLKHLAAQTI-AEQIEILVVDDASTDEGAALVE---TSFPHVrLLRRPvN-GGFAAACNTGLQAA---SGDVLVLLNQDVLLAPDAIERLVAALNVPERGVVGGKLR-Y-PDGRLQHAGGYLLwPQAFGMhdgVGEPDegqydtprEVEflTGALlAVRRNVFERVG---GLDE-GFYPAyyEDVDWCFRIRAAGYRVWY-APDVVGT--HQEGSALRRASHREIAYHRGRWRFllkhmpparl-
WP_082374437.1	212	29	19	glycosyltransferase family 2 protein [Ardenticatena maritima]	VIVPLWNGA-AFIGDCLKHLAAQTI-AEQIEILVVDDASTDEGAALVE---TSFPHVrLLRRPvN-GGFAAACNTGLQAA---SGDVLVLLNQDVLLAPDAIERLVAALNVPERGVVGGKLR-Y-PDGRLQHAGGYLLwPQAFGMhdgVGEPDegqydtprEVEflTGALlAVRRNVFERVG---GLDE-GFYPAyyEDVDWCFRIRAAGYRVWY-APDVVGT--HQEGSALRRASHREIAYHRGRWRFllkhmpparl-
OYT26429.1	207	13	24	hypothetical protein B6U97_03875 [Candidatus Altiarchaeales archaeon ex4484_96]	VLLPAHNEE-AIIRDTIKALREAKYPRIK-QIIVIDDGSTDKTGEILDELSSmDpNMLIIKTNH--LGKANALNRGLKSA---EGDIIVTLDADSKVDVNALTDITRPFADEKVGAVSGIIRgIV-NRNILTWFQDFeYVLSSGW-RYALNninstyIFPG-FAAYRRKAlasVGGFK--------QDTLAEDFDIGVRLRKKDYRLVM--SNAIIY--TKMPQTIRGLIRQRMRWGRGTLQ--
WP_087291602.1	184	16	47	glycosyltransferase family 2 protein [Pseudoflavonifractor sp. An184]	VIIPVYNAE-KYLYQCLSSILTQT--LKEIEILCINDGSTDNSAHILEEFHAKDARVkIITQKN-SGSGAARNNGLTHA---GGEYIAFMDGDDYYPsPSCLERLYTSAVEHSALICGGSLQTdigtsI-RRGKTQFPMHIFTEERF----VLYsevqydygY----YRyIYRKDLLDHNN---IRFP-DYLRFQDPPFFVKAMVCAKKFYC-IPDDVYT--Y------------------------
CCY69307.1	193	11	38	conserved hypothetical glycosyl transferase [Eubacterium sp. CAG:161]	VIIPIYNME-EYLPQCLDSIVSQTLRE--IEILCIDDGSTDGSEEVLKLYcnRDSRIRVIKQNN--QGVSCARNLGIEEA---SGKYVIFMDPDDWYPDKEILETLYVGAEkNNVS-IAGGSFMDYhDGIYNEKFPDRYFGYHFEKDGVIEytdyqfdFGYQRFI-FEKSLLTENH---ISFK-KYVRYQDPPFFVEAMIAARRFYG-VDKPAYC--YRYG---------------------
WP_118589166.1	193	11	38	MULTISPECIES: glycosyltransferase [unclassified Eubacterium]	VIIPIYNME-EYLPQCLDSIVSQTLRE--IEILCIDDGSTDGSEEVLKLYcnRDSRIRVIKQNN--QGVSCARNLGIEEA---SGKYVIFMDPDDWYPDKEILETLYVGAEkNNVS-IAGGSFMDYhDGIYNEKFPDRYFGYHFEKDGVIEytdyqfdFGYQRFI-FEKSLLTENH---ISFK-KYVRYQDPPFFVEAMIAARRFYG-VDKPAYC--YRYG---------------------
WP_112091671.1	149	13	82	glycosyltransferase [Faecalibacterium prausnitzii]	IIVPVYNAQ-KGLSRCLESICSQTY--QELEIIVLNDGSTDDSLAICEQFRAKDPRLvVVDKEN-EGVSRTRNAGLALA---QGDYIQFADSDDVLDPDYTQNLVQAALQHSADLVIAPywmVIPS-NSSKTGHALETLQES-LGIEPEAPktevhkygFL---PQgVYSREDY----------------------------------------------------------------------
PLS79848.1	203	19	28	hypothetical protein CYG59_11020 [Chloroflexi bacterium]	LIIVTYNSV-AQIDACLTALAGQQQS-ELVEIIVVDNASTDDTTTLIR---TRHPEVrLL-REA-ENwgFAGGVNRGVQAA---HGDILALLNPDAVPQPAWLHELTAPLSNAAIGVTGGKVLAH-DGHiqSVGGTLQLPVVLPQYRGEGEEdngqydapadvWSAHGAAmAFRREVWTAVG---GFDE-SFYPAylEESDFCERVRIAGYRVVT-APRAVIQ--HAEATTTGKGSAQFF----------
WP_004931433.1	194	7	37	glycosyltransferase family 2 protein, partial [Streptomyces griseoflavus]	VIIGAYEAM-PYLVECLASVEAQTIDPERVEVIAVDDGSTDGTGECLEEFAARapmpVTVLRQENS--GGPSGPRNVGLDKA---AGRYVFFLDADDRLGPEALERMVGMADRa-GTDVVLGRIEGVNrGAPKSMWGRTLERTDVYSSNIKY-TLSAQKL-FRRALLDRHG---MrFDE-SLFTGEDALFTMEAYLRADGVSV-IADHTCY--YLVG---------------------
WP_078652785.1	194	9	37	glycosyltransferase family 2 protein [Streptomyces sp. NRRL F-525]	-VTVVvgaYEAM-PYLVECLRSVEAQTLDAARIEVIAVDDGSTDGTGEYLEEFAARaaahVTVLHQENS--GGPSSPRNVGLGKA---SGRYVFFLDADDRLAPEALERMVAMADRNGTDVVLGKVEGINrVPPKAAWVETLERTDVFHSNIKF-TLSAQKL-FRRALLERHS---MrFDE-SLFTGEDALFTMEAYLRADGVSV-IADHTCY--YLVG---------------------
WP_026151391.1	194	9	37	glycosyltransferase family 2 protein [Streptomyces prunicolor]	-VTVVvgaYEAM-PYLVECLRSVEAQTLDPARIEVIAVDDGSTDGTGEYLEEFAARaathVTVLHQANS--GGPSSPRNVGLGKA---SGRYVFFLDADDRLAPEALERMVAMADRNGTDVVLGKVEGINrVPPKAAWVQTLERTDVFHSNIKF-TLSAQKL-FRRALLERHS---MrFDE-SLFTGEDALFTMEAYLRADGVSV-IADHTCY--YLVG---------------------
WP_035804905.1	161	6	70	glycosyltransferase family 2 protein [Kitasatospora mediocidica]	VVVPIYNVE-RYLEECLDSIAAQTFRD--FECVMVDDGSTDTSAELARQYaaKDDRFRLVQQQN--KGLGAARNTGWRnIA---DGvEYLAFVDSDDSLPPGA-YELMINTLDeTGSDFVAGNALRFKsTG-YFPSHAHRKPFQETRLRTHV-TEIPSLV-TDRTAWNKV-----YRR-SFFDAA----------------------------------------------------
WP_073931914.1	193	10	38	glycosyltransferase [Streptomyces sp. CB02400]	-VTVVigaYEAM-PYLVECLASVEAQTIDPERIEVIAVDDGSTDGTGECLEEFAARapmhVTVLRQENS--GGPSGPRNVGLGKA---TGRYVFFLDADDRLGPEALERMVSMADRa-GTDVVLGRIEGVDrGAPKSMWGKTLERTDVYSSNIKF-TLSAQKL-FRRALLDRHG---MrFDE-SLFTGEDALFTMEAYLRADGVSV-IADYTCY--YLVG---------------------
WP_030858169.1	194	7	37	glycosyltransferase family 2 protein [Streptomyces sp. NRRL S-37]	VIIGAYEAM-PYLVECLASVEAQTIGPERIEVIAVDDGSTDGTGEYLEEFAARtplqVTVVRQKNS--GGPSGPRNVGLGRA---TGRYVFFLDADDRLGPEALERMVSMADRa-GTDVVLGRIEGVNrGAPKSMWGKTLERTDVYSSHIKF-TLSAQKL-FRRALLDRHG---MrFDE-SLFTGEDALFTMEAYLRADGVSV-IADYTCY--YLVG---------------------
KOT35886.1	193	10	38	glycosyl transferase [Streptomyces caelestis]	-VTVVigaYEAM-PYLTECLASVEAQTIAPERVEVIAVDDGSTDGTGECLEEFAARapmpVTVLRQENS--GGPSGPRNVGLAKA---AGRYVFFLDADDRLGPEALERMVGMADRa-GTDVVLGRIEGVNrGAPKSMWGRTLERTDVYSSPIKF-TLSAQKL-FRRSLLERHG---MrFDE-SLFTGEDALFTMEAYLRADGVSV-IADYTCY--YLVG---------------------
KOV26208.1	193	10	38	glycosyl transferase [Streptomyces sp. XY152]	-VTVVigaYEAM-PYLTECLASVEAQTIAPERVEVIAVDDGSTDGTGECLEEFAARapmpVTVLRQENS--GGPSGPRNVGLAKA---AGRYVFFLDADDRLGPEALERMVGMADRa-GTDVVLGRIEGVNrGAPKSMWGRTLERTDVYSSPIKF-TLSAQKL-FRRSLLERHG---MrFDE-SLFTGEDALFTMEAYLRADGVSV-IADYTCY--YLVG---------------------
WP_030818386.1	193	10	38	MULTISPECIES: glycosyltransferase family 2 protein [Streptomyces]	-VTVVigaYEAM-PYLTECLASVEAQTIAPERVEVIAVDDGSTDGTGECLEEFAARapmpVTVLRQENS--GGPSGPRNVGLAKA---AGRYVFFLDADDRLGPEALERMVGMADRa-GTDVVLGRIEGVNrGAPKSMWGRTLERTDVYSSPIKF-TLSAQKL-FRRSLLERHG---MrFDE-SLFTGEDALFTMEAYLRADGVSV-IADYTCY--YLVG---------------------
WP_053635820.1	193	10	38	glycosyltransferase family 2 protein [Streptomyces sp. XY152]	-VTVVigaYEAM-PYLTECLASVEAQTIAPERVEVIAVDDGSTDGTGECLEEFAARapmpVTVLRQENS--GGPSGPRNVGLAKA---AGRYVFFLDADDRLGPEALERMVGMADRa-GTDVVLGRIEGVNrGAPKSMWGRTLERTDVYSSPIKF-TLSAQKL-FRRSLLERHG---MrFDE-SLFTGEDALFTMEAYLRADGVSV-IADYTCY--YLVG---------------------
WP_028264191.1	150	10	81	glycosyltransferase family 2 protein [Atopobium fossor]	VIVPAYNSQ-DFLEACLESLRSQTLH--NIEIICVNDGSTDNTANLLEQAAAQDSRIvVVSQKN-AGLGCARNAGVAAA---HGKIIMLCDADDMLKPQACEHVYQQFEQSDCTAVVFGFEIF-PETALHPSLA-SQLHPRDVVITKSnrgieqllFEEKARPfAWRIA------------------------------------------------------------------------
EPJ42433.1	194	7	37	putative glycosyltransferase EpsJ [Streptomyces afghaniensis 772]	VIIGAYEAM-PYLIECLSSVEAQTIDPERIEVIAVDDGSTDGTGEYLEEFAERapmhVLVIRQENS--GGPSGPRNVGLGKA---TGRYVFFLDADDRLGPEALERMVDMADRa-GTDVVLGKVEGVNrSAPKSMWGKTVERTDVYSSNIKF-TLSAQKL-FRRALLDRHG---MrFDE-SLFTGEDALFTMEAYLRADGVSV-VADHTCY--YLVG---------------------
WP_085576044.1	193	10	38	glycosyltransferase family 2 protein [Streptomyces sp. 13-12-16]	-VTVVigaYEAM-PYLVECLASVEAQTIDPERIEVIAVDDGSTDGTGECLEEFAARapmpVTVLRQENS--GGPSGPRNVGLGKA---TGRYVFFLDADDRLGPEALERMVGMADRa-GTDVVLGRIEGVDrGAPKSMWGRTLERTDVYSSNIKF-TLSAQKL-FRRALLDRHG---MrFDE-SLFTGEDALFTMEAYLRADGVSV-IADYTCY--YLVG---------------------
WP_003990201.1	194	7	37	glycosyltransferase [Streptomyces viridochromogenes]	VIIGAYEAM-PYLIECLSSVEAQTIDPERVEVIAVDDGSTDGTGEYLEEFAERapmhVLVVRQENS--GGPSGPRNVGLAKA---TGRYVFFLDADDRLGPEALERMVGMADRa-GTDVVLGKVEGVNrSAPKSMWGKTLERTDVFSSNIKF-TLSAQKL-FRRELLDRHG---MrFDE-SLFTGEDALFTMEAYLRADGVSV-VADHTCY--YLVG---------------------
KDN74305.1	194	7	37	glycosyl transferase [Streptomyces olindensis]	VIIGAYEAM-PYLIECLASVEAQTLDPERIEVIAVDDGSTDGTGEYLEEFAERapmhVLVVRQQNS--GGPSGPRNVGLGKA---SGRYVFFLDADDRLGPEALERMVAMADRa-GTDVVLGKVEGVNrSAPKSMWGKTVERTDVFSSNIKF-TLSAQKL-FRRELLERHG---MrFDE-SLFTGEDALFTMEAYLRADGVSV-VADHTCY--YLVG---------------------
WP_029181310.1	194	7	37	glycosyltransferase family 2 protein [Streptomyces chartreusis]	VIIGAYEAM-PYLIECLASVEAQTLDPERIEVIAVDDGSTDGTGEYLEEFAERapmhVLVIRQENS--GGPSGPRNVGLGKA---TGRYVFFLDADDRLGPEALERMVDMADRa-GTDVVLGKVEGVNrSAPKSMWGKTVERADVYSSNIKF-TLSAQKL-FRRALLERHG---MrFDE-SLFTGEDALFTMEAYLRADGVSV-VADHTCY--YLVG---------------------
WP_037666730.1	194	7	37	glycosyltransferase [Streptomyces afghaniensis]	VIIGAYEAM-PYLIECLSSVEAQTIDPERIEVIAVDDGSTDGTGEYLEEFAERapmhVLVIRQENS--GGPSGPRNVGLGKA---TGRYVFFLDADDRLGPEALERMVDMADRa-GTDVVLGKVEGVNrSAPKSMWGKTVERTDVYSSNIKF-TLSAQKL-FRRALLDRHG---MrFDE-SLFTGEDALFTMEAYLRADGVSV-VADHTCY--YLVG---------------------
WP_059417759.1	194	7	37	glycosyltransferase [Streptomyces azureus]	VIIGAYEAM-PYLIECLSSVEAQTIDPERVEVIAVDDGSTDGTGEYLEEFAERapmhVLVIRQENS--GGPSGPRNVGLGKA---TGRYVFFLDADDRLGPEALERMVDMADRa-GTDVVLGKVEGVNrSAPKSMWGKTVERTDVFSSNIKF-TLSAQKL-FRRELLDRHG---MrFDE-SLFTGEDALFTMEAYLRADGVSV-VADHTCY--YLVG---------------------
WP_086603228.1	194	7	37	glycosyltransferase [Streptomyces swartbergensis]	VIIGAYEAM-PYLIECLASVEAQTIDPERIEVIAVDDGSTDGTGEYLEEFAERaplhVLVIRQENS--GGPSGPRNVGLGKA---TGRYVFFLDADDRLGPEALERMVDMADRa-GTDVVLGKVEGVNrSAPKSMWGKTVERTDVFSSNIKF-TLSAQKL-FRRELLDRHG---MrFDE-SLFTGEDALFTMEAYLRADGVSV-VADHTCY--YLVG---------------------
WP_097216580.1	194	7	37	glycosyltransferase [Streptomyces sp. Ag82_G6-1]	VIIGAYEAM-PYLIECLSSVEAQTIDPMRVEVIAVDDGSTDGTGEYLEEFAARapmhVLVIRQENS--GGPSGPRNVGLGKA---TGRYVFFLDADDRLGPEALERMVDMADRa-GTDVVLGKVEGVNrSAPKSMWGKTVERTDVFSSNIKF-TLSAQKL-FRRALLDRHG---MrFDE-SLFTGEDALFTMEAYLRADGVSV-VADHTCY--YLVG---------------------
WP_114252440.1	194	7	37	glycosyltransferase [Streptomyces sp. Go-475]	VIIGAYEAM-PYLIECLASVEAQTLDPERIEVIAVDDGSTDGTGEYLEEFAQRapmhVLVVRQENS--GGPSGPRNVGLAKA---SGRYVFFLDADDRLGPEALERMVAMADRa-GTDVVLGKVEGVNrSAPKSMWGKTVERTDVFSSNIKF-TLSAQKL-FRRALLERHG---MrFDE-SLFTGEDALFTMEAYLRADGVSV-VADHTCY--YLVG---------------------
KIE28094.1	194	7	37	glycosyl transferase [Streptomyces sp. MUSC 125]	VIIGAYEAM-PYLVECLASVEAQTIDPARMEVIAVDDGSTDGTGEYLEEFAARapmpVTVIRQENS--GGPSGPRNVGIGKA---AGRYVFFLDADDRLGPEALERMV-AMAEkNGTDVVLGRVEGVNrIPPKSMWGKTLDRTDVFSSKIKF-TLSAQKL-FRRALLERHG---MrFDE-SLWTGEDALFTMEAYLRANGVSL-IADYTCY--YLVG---------------------
WP_078886216.1	194	7	37	glycosyltransferase family 2 protein [Streptomyces sp. MUSC 125]	VIIGAYEAM-PYLVECLASVEAQTIDPARMEVIAVDDGSTDGTGEYLEEFAARapmpVTVIRQENS--GGPSGPRNVGIGKA---AGRYVFFLDADDRLGPEALERMV-AMAEkNGTDVVLGRVEGVNrIPPKSMWGKTLDRTDVFSSKIKF-TLSAQKL-FRRALLERHG---MrFDE-SLWTGEDALFTMEAYLRANGVSL-IADYTCY--YLVG---------------------
WP_089106814.1	195	6	36	glycosyltransferase [Streptomyces hyaluromycini]	VIIGAYEAM-PYLVECLASVEHQTLDAARMEVIAVDDGSTDGTGEYLEEFAARaampVTVIRQQNS--GGPSGPRNVGLAKA---GGRYVFFLDADDRLGPEALERMVATADKNNTDVVLGKVEGINrKAPQSMWGETLGRTDVFSSNIKF-ALSAQKL-FRRALLERHS---MrFDE-SLWTGEDALFTMEAYLRADGVSV-VADYPCY--YLVG---------------------
WP_041989838.1	194	7	37	glycosyltransferase family 2 protein [Streptomyces sp. AcH 505]	VIIGAYEAM-PYLTRCLESVAAQTLDADRIEIVAVDDGSTDGTAEYLDSFAADSAIptrvLHQANS--GGPSGPRNVGLGMA---RGRFVFFLDADDYLGPEALERLVAMADKa-GTDVVAGKAEGVNrVAPRSMWTRTTERVNIYNSRIMY-ALSAQKL-FRRELLVRRG---MrFDE-TLRTGEDAVFTMEAFLCGNGVSV-VADYTCY--YLVG---------------------
WP_043676738.1	194	9	37	glycosyltransferase family 2 protein [Streptomyces xylophagus]	-VTVVigaYEAM-PYLVECLRSVEAQTLDPARIEVIAVDDGSTDGTGEYLEEFAARaathVTVIRQENS--GGPSSPRNVGLGKA---SGRYVFFLDADDRLAPEALERMVAMADRNGTDVVLGKVEGINrVPPKAAWVETLERTDVFHSNIKF-TLSAQKL-FRRALLERNG---MrFDE-SLFTGEDALFTMEAYLRADGVSV-IADHTCY--YLVG---------------------
WP_097264018.1	193	8	38	glycosyltransferase family 2 protein [Streptomyces sp. TLI_55]	VVIGAYEAM-PYLVECLASVEAQTldHAR--IEVIAVDDGSTDGTGECLEQFAARadmpVTVIRQDNS--GGPSGPRNVGLDKA---AGRYVFFLDADDRLGPEALERMVAMADRNGTDVVLGRVEGINrKPPQSMWGRTLERTDVWSSNIKF-TLSAQKL-FRRELLNRHS---MrFDE-SLWTGEDALFTMEAYLRADGVSL-IDDYTCY--YLVG---------------------
SNX58408.1	192	11	39	glycosyl transferase family 2 [Streptomyces sp. TLI_55]	-VTVVigaYEAM-PYLVECLASVEAQTldHAR--IEVIAVDDGSTDGTGECLEQFAARadmpVTVIRQDNS--GGPSGPRNVGLDKA---AGRYVFFLDADDRLGPEALERMVAMADRNGTDVVLGRVEGINrKPPQSMWGRTLERTDVWSSNIKF-TLSAQKL-FRRELLNRHS---MrFDE-SLWTGEDALFTMEAYLRADGVSL-IDDYTCY--YLVG---------------------
WP_026178052.1	194	9	37	glycosyltransferase family 2 protein [Streptomyces hokutonensis]	-VTVVigaYEAM-PYLVECLRSVEAQTLDPARIEVVAVDDGSTDGTGEYLEQFAARaathVTVIRQENS--GGPSSPRNVGLGKA---TGRYVFFLDADDRLAPEALERMVAMADRNGTDVVLGKVEGINrVPPKAAWVETLERTDVFHSNIKF-TLSAQKL-FRRALLDRHS---MrFDE-SLFTGEDALFTMEAYLRADGVSV-IADHVCY--YLVG---------------------
WP_093626679.1	194	9	37	glycosyltransferase family 2 protein [Streptomyces sp. 3213.3]	-VTVVigaYEAM-PYLVECLRSVEAQTLDPARIEVVAVDDGSTDGTGEYLEQFAARaathVTVIRQENS--GGPSSPRNVGLGKA---SGRYVFFLDADDRLAPEALERMVAMADRNGTDVVLGKVEGINrVPPKAAWVETLERTDVFHSNIKF-TLSAQKL-FRRALLERHS---MrFDE-SLFTGEDALFTMEAYLRADGVSV-IADHVCY--YLVG---------------------
WP_115908200.1	195	6	36	glycosyltransferase family 2 protein [Streptomyces sp. 75]	VVIGAYEAM-PYLVECLASVEAQTIDPERIEVIAVDDGSTDGSGEYLEEFAARaampVTVIRQDNS--GGPSGPRNVGLGKA---AGRYVFFLDADDRLGPEALERMVAMADRNGTDVVLGRVEGINrKPPGSMWGKTLDRTDVYSSNIKF-TLSAQKL-FRRELLERHG---MrFDE-SLWTGEDALFTMEAYLRANGVSV-LADYTCY--YLVG---------------------
SED51690.1	194	9	37	Glycosyl transferase family 2 [Streptomyces sp. 3213]	-VTVVigaYEAM-PYLVECLRSVEAQTLDPARIEVVAVDDGSTDGTGEYLEQFAARaathVTVIRQENS--GGPSSPRNVGLGKA---SGRYVFFLDADDRLAPEALERMVAMADRNGTDVVLGKVEGINrVPPKAAWVETLERTDVFHSNIKF-TLSAQKL-FRRALLERHS---MrFDE-SLFTGEDALFTMEAYLRADGVSV-IADHVCY--YLVG---------------------
AKN75286.1	185	6	46	glycosyl transferase [Streptomyces sp. PBH53]	-----------YLVECLASVEAQTIDPARMEVIAVDDGSTDGTGEYLEEFAARapmsVTVIRQENS--GGPSGPRNVGLAKA---TGRFVFFLDADDRLGPEALERMIAMADKNGTDVVLGKVEGVNrSAPKSMWGKTLDRADVYTSNIKF-TLSAQKL-FRRSLLEQHG---MrFDE-SLFTGEDALFTLEAYLRANGVSV-VADYTCY--YLVG---------------------
WP_055620971.1	185	6	46	glycosyltransferase family 2 protein [Streptomyces sp. JHA19]	-----------YLVECLASVEAQTIDPERIEIITVDDGSTDGTGEYLEKFAARaampVTVIRQENS--GGPSGPRNVGLGKA---TGRYVFFLDADDRLGPEALERMVAMADRNGTDVVLGRIEGVNrGAPKSMWGRTLERTDVFSSNIRY-TLSAQKL-FRRELLTRHG---MrFDE-SLWTGEDALFTMEAYLRADGVSV-IADYTCY--YLVG---------------------
WP_059254985.1	185	6	46	MULTISPECIES: glycosyltransferase family 2 protein [Streptomyces]	-----------YLVECLASVEAQTIDPARMEVIAVDDGSTDGTGEYLEEFAARapmsVTVIRQENS--GGPSGPRNVGLAKA---TGRFVFFLDADDRLGPEALERMIAMADKNGTDVVLGKVEGVNrSAPKSMWGKTLDRADVYTSNIKF-TLSAQKL-FRRSLLEQHG---MrFDE-SLFTGEDALFTLEAYLRANGVSV-VADYTCY--YLVG---------------------
WP_108710648.1	185	6	46	glycosyltransferase family 2 protein [Streptomyces nigra]	-----------YLVECLASVEAQTIDPERIEIITVDDGSTDGTGEYLEEFAARaampVTVIRQENS--GGPSGPRNVGLGKA---TGRYVFFLDADDRLGPEALERMVAMADRNGTDVVLGRIEGVNrGAPKSMWGRTLERTDVFSSNIRY-TLSAQKL-FRRELLTRHG---MrFDE-SLWTGEDALFTMEAYLRADGVSV-IADYTCY--YLVG---------------------
WP_115508843.1	185	6	46	glycosyltransferase family 2 protein [Streptomyces sp. M7]	-----------YLVECLASVEAQTIDPERIEIITVDDGSTDGTGEYLEKFAARaampVTVIRQENS--GGPSGPRNVGLGKA---TGRYVFFLDADDRLGPEALERMVAMADRNGTDVVLGRIEGVNrGAPKSMWGRTLERTDVFSSNIRY-TLSAQKL-FRRELLARHG---MrFDE-SLWTGEDALFTMEAYLRADGVSV-IADYTCY--YLVG---------------------
WP_004001318.1	195	6	36	glycosyltransferase [Streptomyces viridochromogenes]	VIIGAYEAM-PYLVECLASVEAQTIDPERIEVITVDDGSTDGTGECLEEFAARapmpVTVIRQENS--GGPSGPRNVGLGKA---AGRYVFFLDADDRLGPEALERMVAMADKNGTDVVLGRVEGINrTAPKSMWGRTLDRTDVFSSNIKF-TLSAQKL-FRRELLTRHN---MrFDE-SLWTGEDALFTMEAYLRADGVSV-IADHTCY--YLVG---------------------
WP_037747660.1	195	6	36	glycosyltransferase [Streptomyces mirabilis]	VVIGAYEAM-PYLVECLQSVEAQTLDPARIEVIAVDDGSTDGTGEYLEEFAARapmhVTVLRQENS--GGPSGPRNVGLGKA---TGRYVFFLDADDRLAPEALERMVAMADRNGTDVVLGKVEGINrIPPRTMWGKTLERTDVFSSNIKF-TLSAQKL-FRRALLERHG---MrFDE-SLFTGEDAVFTMEAYLRADGVSV-IADHVCY--YLVG---------------------
WP_062144507.1	195	6	36	glycosyltransferase [Streptomyces curacoi]	VIIGAYEAM-PYLVECLASVEAQTIDPERIEVIAVDDGSTDGTGECLEEFAARapmpVTVIRQENS--GGPSGPRNVGLGKA---AGRYVFFLDADDRLGPEALERMVAMADKNGTDVVLGRVEGVNrTAPKSMWGRTLERTDVFSSNIKF-TLSAQKL-FRRELLTRHN---MrFDE-SLWTGEDALFTMEAYLRADGVSV-IADYTCY--YLVG---------------------
CUW28458.1	195	6	36	Putative glycosyltransferase EpsH [Streptomyces reticuli]	VIIGAYEAM-PYLVECLASVEAQTIDPARMEVIAVDDGSTDGTGEYLEEFAARapmsVTVIRQENS--GGPSGPRNVGLAKA---TGRFVFFLDADDRLGPEALERMIAMADKNGTDVVLGKVEGVNrSAPKSMWGKTLDRADVYTSNIKF-TLSAQKL-FRRSLLEQHG---MrFDE-SLFTGEDALFTLEAYLRANGVSV-VADYTCY--YLVG---------------------
WP_004988193.1	193	10	38	glycosyltransferase family 2 protein [Streptomyces viridosporus]	-VTVVvgaYEAM-PYLVECLASVEAQTIDPGRIEVIAVDDGSTDGTGEYLEEFADRapmpVTVIRQENS--GGPSGPRNVGLGKA---AGRYVFFLDADDRLGPEALERMVAMADRa-GTDVVLGRVEGVNrGAPKSMWGRTLERTDVFSSNIKF-TLSAQKL-FRRSLLDRHG---MrFDE-SLFTGEDALFTMEAYLRADGVSV-VADHTCY--YLVG---------------------
WP_016826302.1	193	10	38	MULTISPECIES: glycosyltransferase family 2 protein [Streptomyces]	-VTVVvgaYEAM-PYLVECLASVEAQTIDPGRIEVIAVDDGSTDGTGEYLEEFADRapmpVTVIRQENS--GGPSGPRNVGLGKA---AGRYVFFLDADDRLGPEALERMVAMADRa-GTDVVLGRVEGVNrGAPKSMWGRTLERTDVFSSNIKF-TLSAQKL-FRRSLLDRHG---MrFDE-SLFTGEDALFTMEAYLRADGVSV-VADHTCY--YLVG---------------------
WP_081236483.1	193	10	38	glycosyltransferase family 2 protein [Streptomyces viridosporus]	-VTVVigaYEAM-PYLVECLASVEAQTIDPERIEVIAVDDGSTDGTGEYLEEFADRapmpVTVIRQENS--GGPSGPRNVGLGKA---AGRYVFFLDADDRLGPEALERMVAMADRa-GTDVVLGRVEGVNrGAPKSMWGRTLERTDVFSSNIKF-TLSAQKL-FRRSLLDRHG---MrFDE-SLFTGEDALFTMEAYLRADGVSV-IADHTCY--YLVG---------------------
WP_043729004.1	194	7	37	glycosyltransferase family 2 protein [Streptomyces zinciresistens]	VIIGAYEAM-PYLVECLASVEAQTIDPGRIEVITVDDGSTDGTGEYLEEFAARaampVTVIRQENS--GGPSGPRNVGLGKA---AGRYVFFLDADDRLGPEALERMV-AIGDrNGTDVVLGRIEGVNrGAPKSMWGRTLERTDVYSSNIKF-TLSAQKL-FRREFLTRHH---MrFDE-SLWTGEDAVFTMEAYLRADGVSV-VADHTCY--YLVG---------------------
WP_031476874.1	195	6	36	glycosyltransferase [Streptomyces bicolor]	VIIGAYEAM-PYLVECLASVEAQTIDPERIEVIAVDDGSTDGTGECLEEFAARVpmpvTVVRQENS--GGPSGPRNVGLGKA---AGRYVFFLDADDRLGPEALERMVAMADKNGTDVVLGRVEGVNrTAPKSMWGKTLDRTDVFSSNIKF-TLSAQKL-FRRELLTRHN---MrFDE-SLWTGEDALFTMEAYLRANGVSV-IADHTCY--YLVG---------------------
WP_048583891.1	195	6	36	glycosyltransferase [Streptomyces viridochromogenes]	VIIGAYEAM-PYLVECLASVEAQTIDPECIEVIAVDDGSTDGTGECLEEFAARaampVTVIRQENS--GGPSGPRNVGLGKA---AGRYVFFLDADDRLGPEALERMVAMADKNGTDVVLGRVEGVNrTAPKSMWGKTLDRTDVFSSNIKF-TLSAQKL-FRRDLLTRHN---MrFDE-SLWTGEDALFTMEAYLRADGVSV-VADYTCY--YLVG---------------------
WP_062724637.1	195	6	36	glycosyltransferase [Streptomyces caeruleatus]	VIIGAYEAM-PYLVECLASVEAQTIDPERIEVIAVDDGSTDGTGECLEEFAARVampvTVIRQENS--GGPSGPRNVGLGKA---AGRYVFFLDADDRLGPEALERMVAMADRNGTDVVLGRVEGVNrTAPKSMWGKTLDRTDVYSSNIKF-TLSAQKL-FRRELLTRHH---MrFDE-SLWTGEDALFTMEAYLRADGVSV-IADYTCY--YLVG---------------------
WP_030779384.1	193	10	38	glycosyltransferase family 2 protein [Streptomyces antibioticus]	-VTVVigaYEAM-PYLVECLASIEAQSmDPDR-IEVIAVDDGSQDGTGEYLEEFAARapmaVTVIRQENS--GGPSGPRNVGLGKA---TGRFVFFLDADDRLGPEALERMVAMADRNGTDVVLGKVEGVNrNAPKSMWGRNRERTDVFSSNIKF-TLSAQKL-FRRELLERHG---MrFDE-SLWTGEDALFTMEAYLRADGVSI-VADHTCY--YLVG---------------------
WP_090779369.1	190	22	41	glycosyltransferase family 2 protein [Paenibacillaceae bacterium GAS479]	IIILTHNQL-EYTLRCLDSINR---HTEDYELILVDNGSTDGTAELL-----LKSSFkTVLNPGNEGFAKGCNQGLALA---EGDTVLFLNNDVVVTPGWLTAMHRLLESEPLCGMVGPVSNY-VSGPQQVHAGY------GPGLAGLeafaaersRVWHGHFwelprlvgfclLLRRSLALELG---GFDE-RygLGNYEDDDLCMRVRNGGWRLLT-ACDSFIH--HYGHVTMNSL---------------
WP_104785616.1	194	7	37	glycosyltransferase family 2 protein [Streptomyces sp. QL37]	VIVGAYNAM-PYLVRCLESVEAQTIGARRIEIVAVDDGSTDGTGEYLEEFAARsevPVRVVRQKN--SGgPSGPRNVGLGMA---GGRYVFFLDADDYLGDEALERMVEMADRa-GTDVVLGKVVGVNrGAPKSMWSRTQERVDVHRSKVIY-TLSAQKL-FRRELLERIG---LrFDE-ELRTGEDALFTMEAYLRGAGVSV-ISDYTCY--YLVG---------------------
