# Supplementary figures and images for: Deep evolutionary analysis reveals the design principles of fold A glycosyltransferases
Source: eLife journal article supplement (doi:10.7554/elife.54532), 2020-04-01

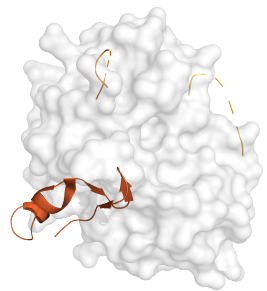

GT31

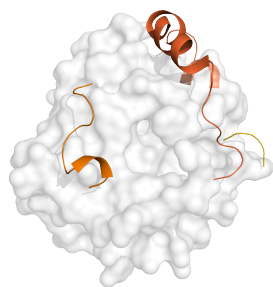

GT7

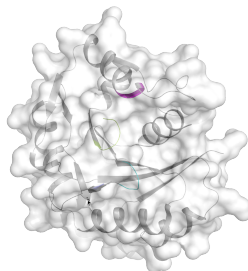

GT-A core

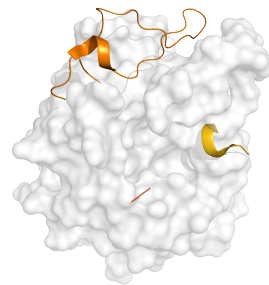

GT6

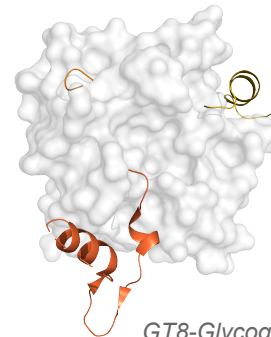

GT8-Glycogenin

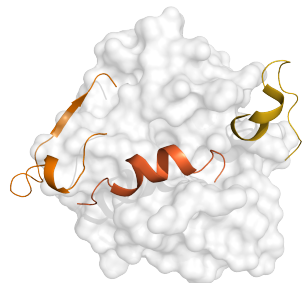

GT13

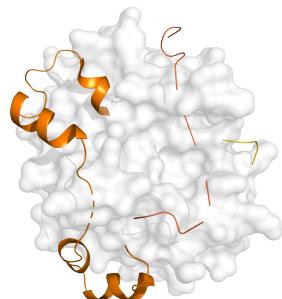

GT2-Class1

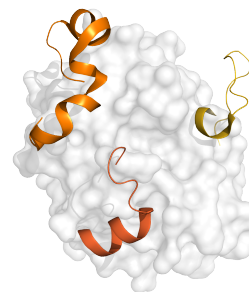

GT24

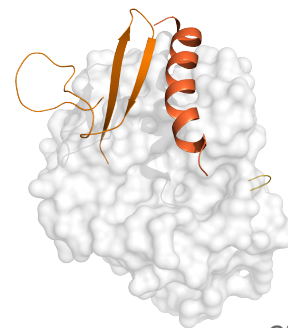

GT64

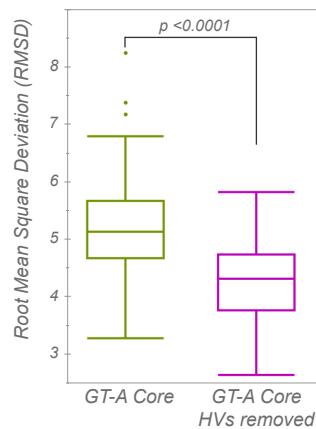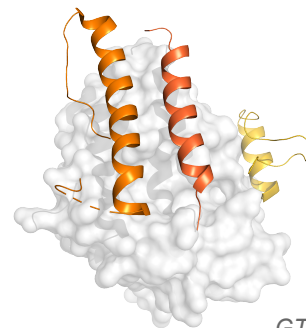

GT55

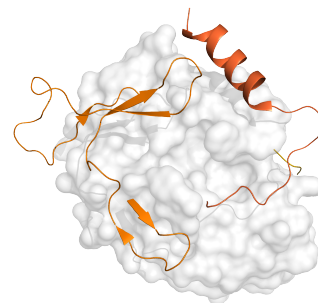

GT27

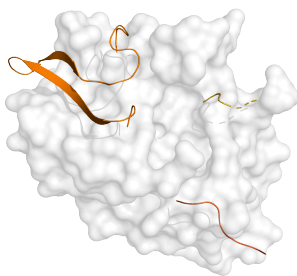

GT43

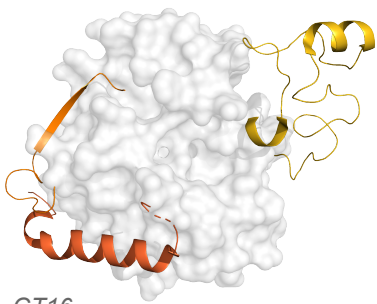

GT16

Supplement: supp [file elife-54532-supp-v1.zip]

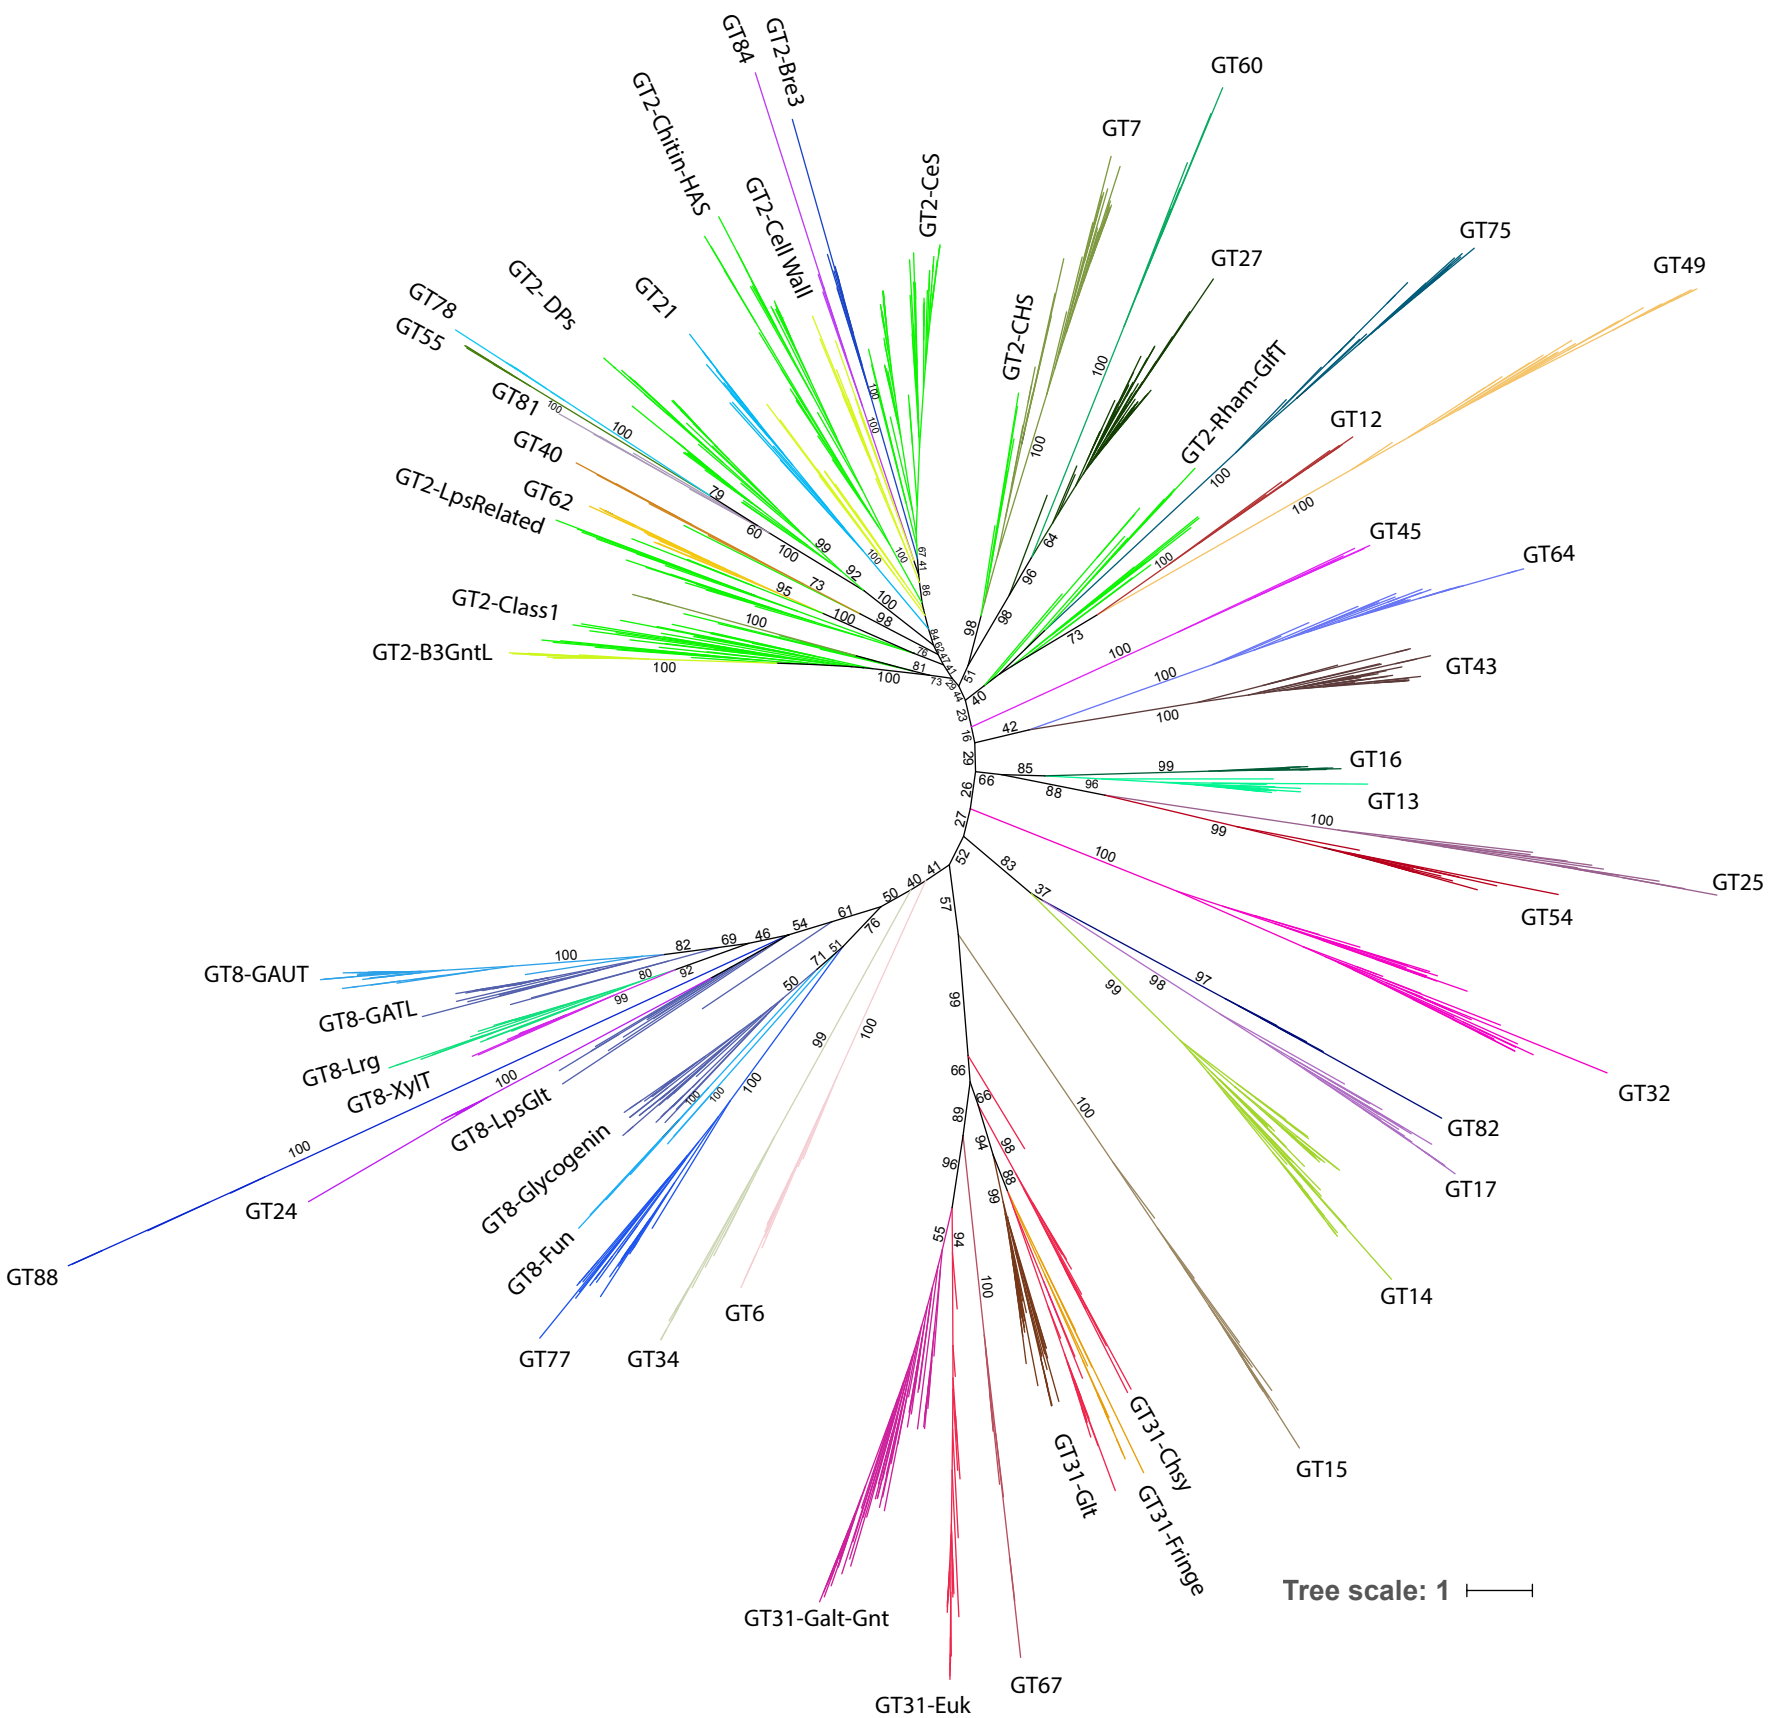

Supplement: supp [file elife-54532-supp-v1.zip]

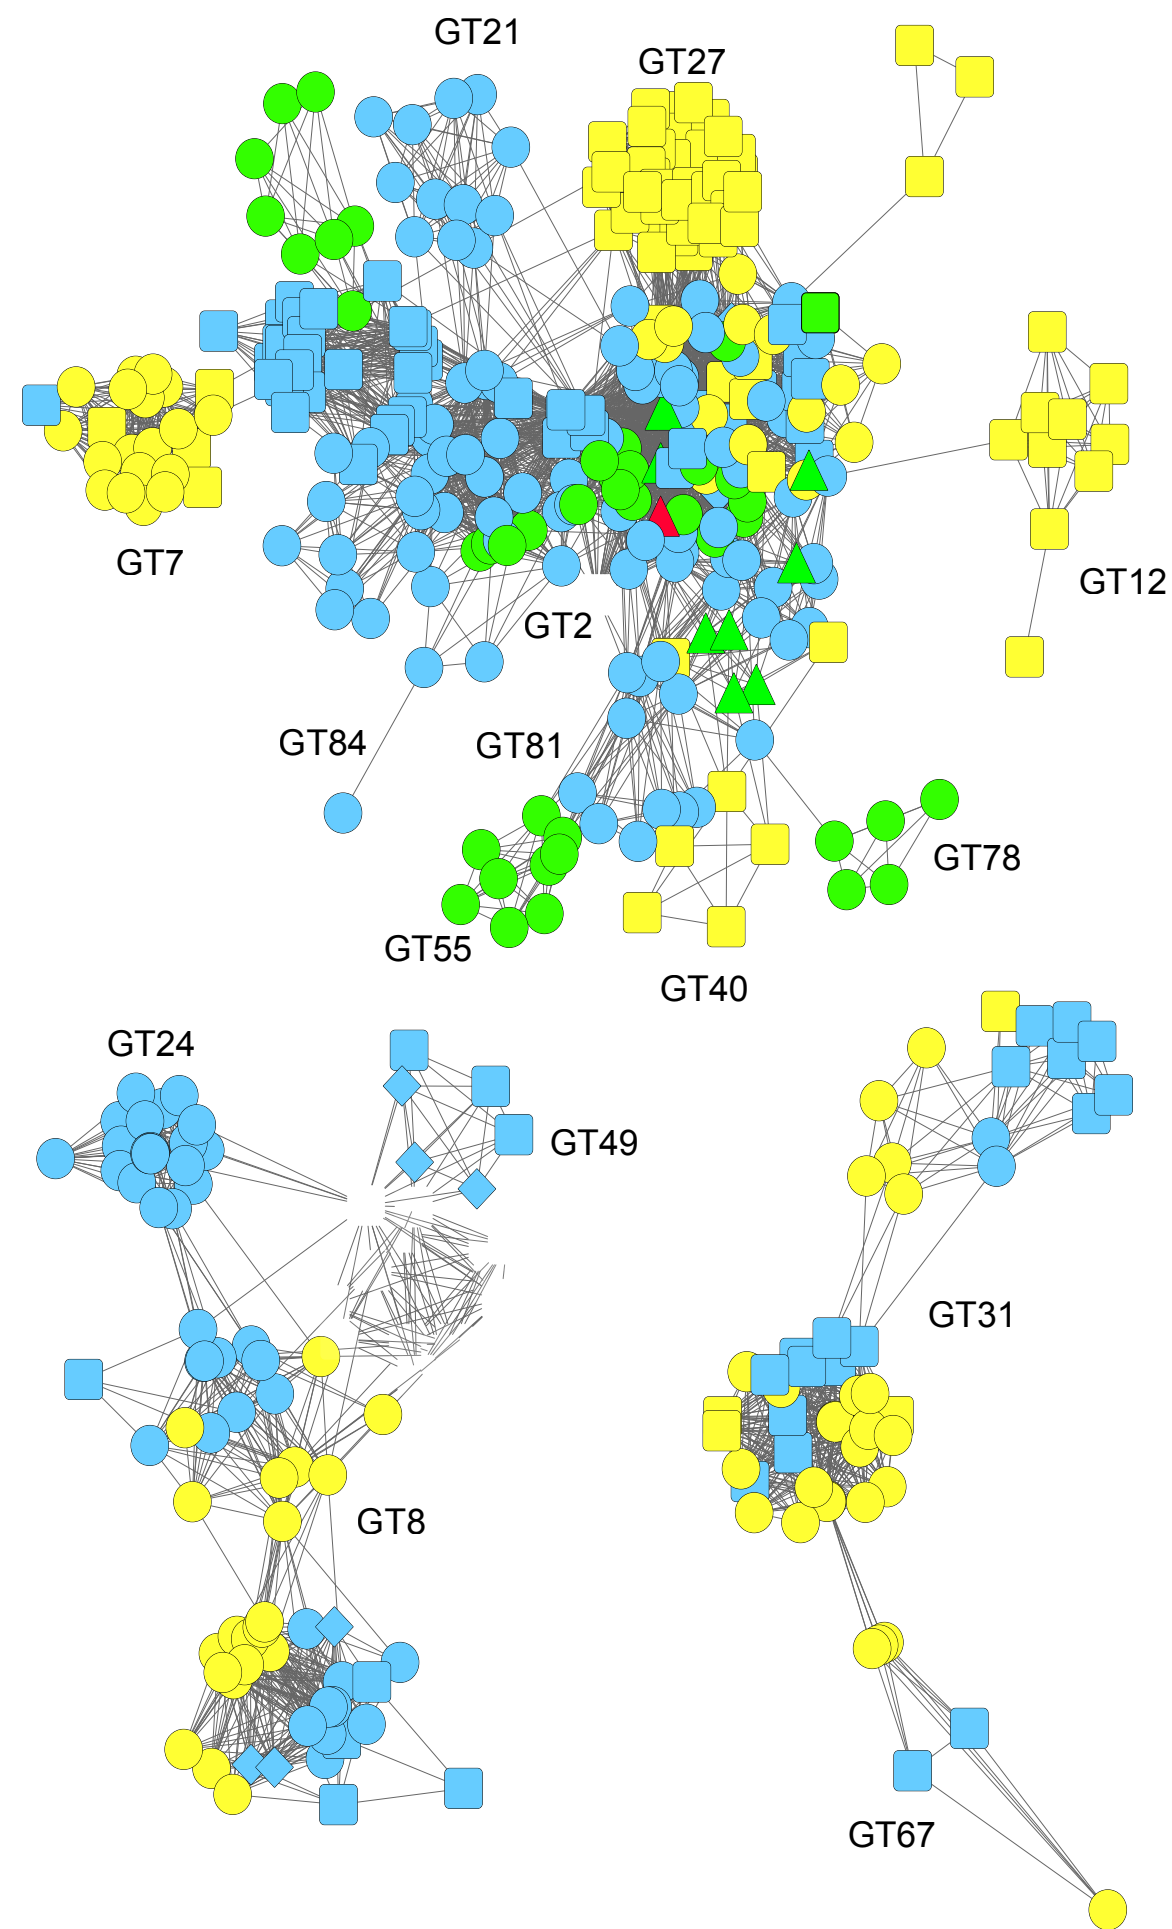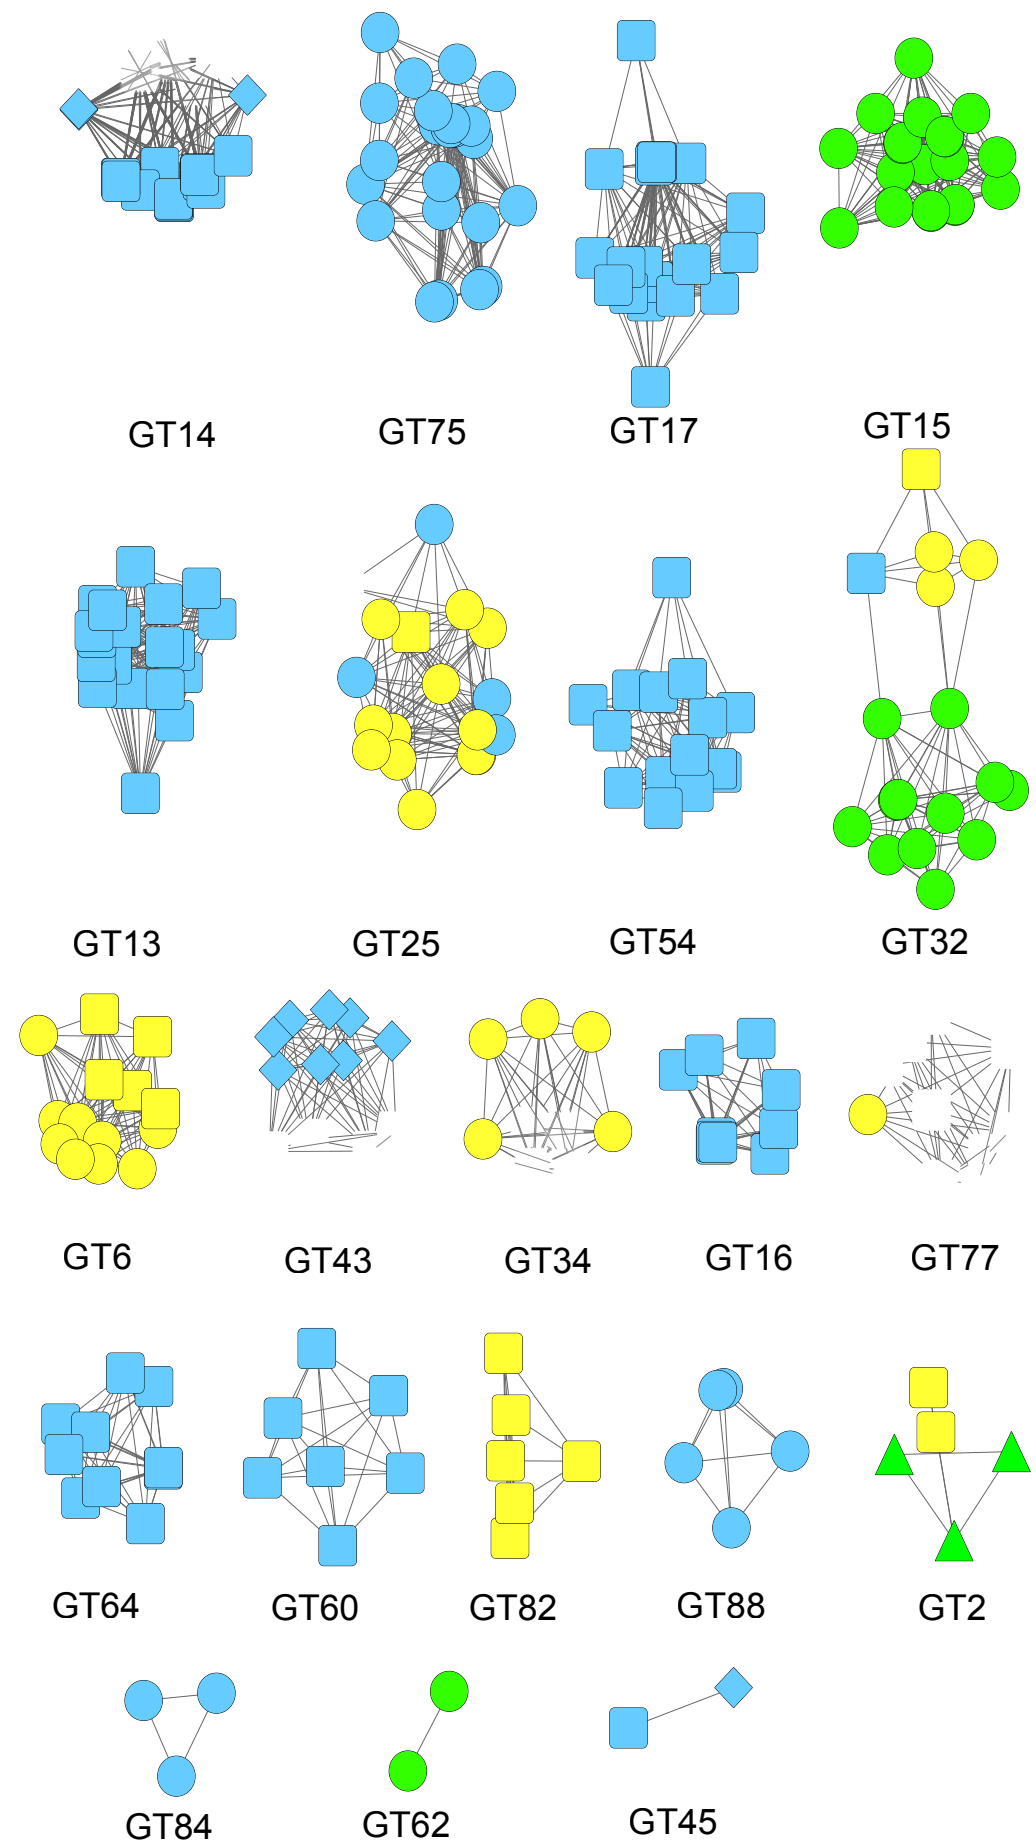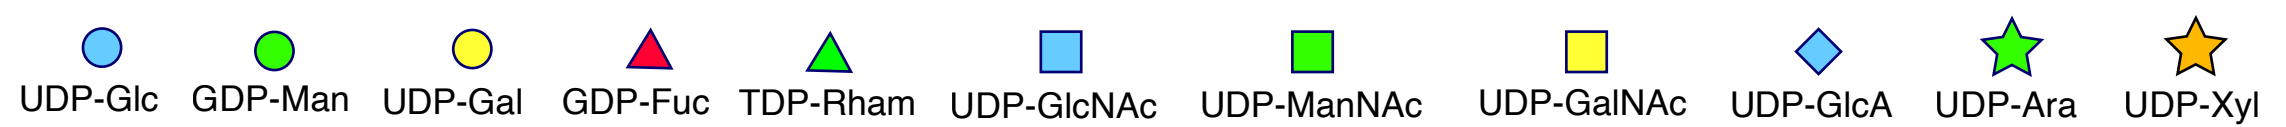

Supplement: supp [file elife-54532-supp-v1.zip]

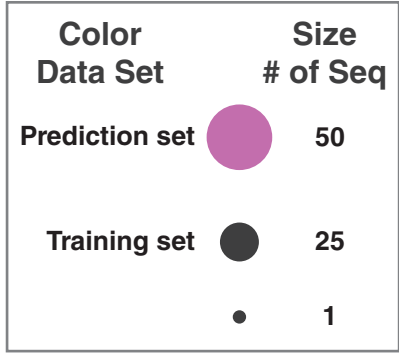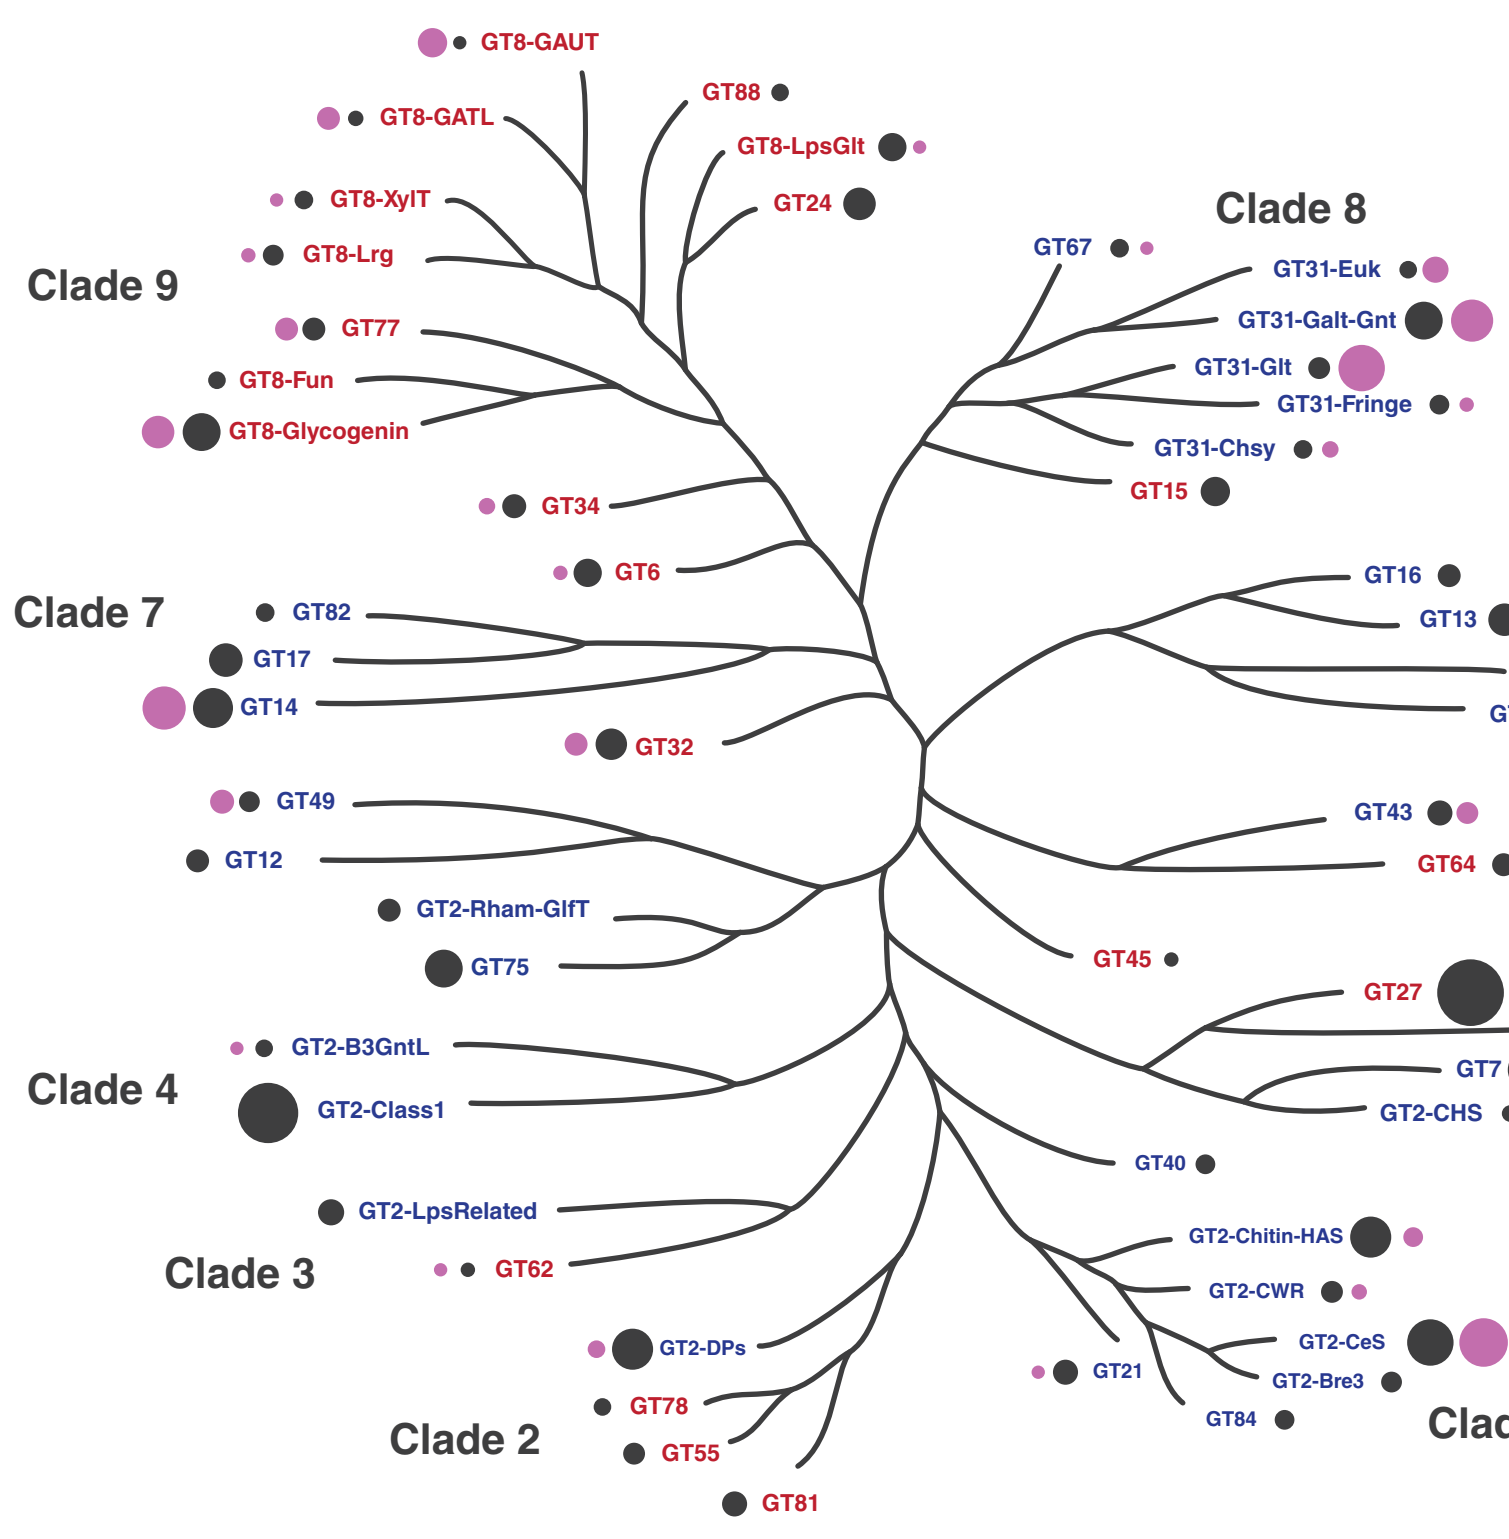

Supplement: supp [file elife-54532-supp-v1.zip]

A. GT2 - 2z87

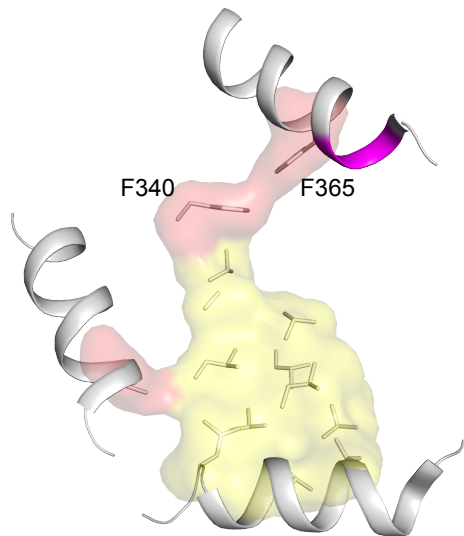

B. GT15 - 5a07

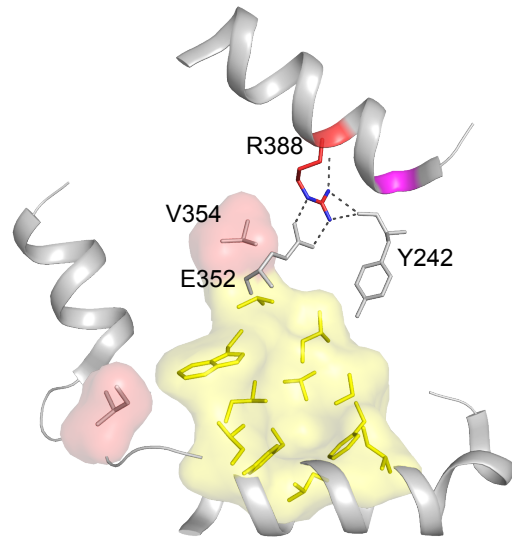

C. GT55 - 2wvl

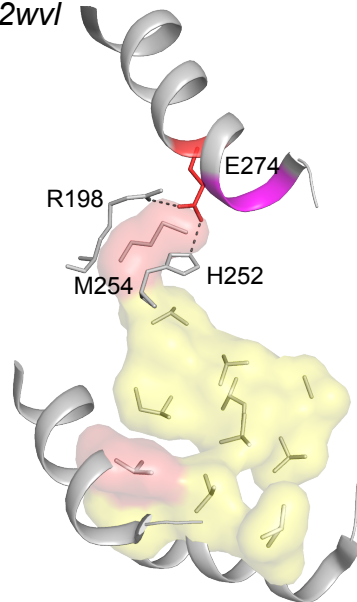

Supplement: supp [file elife-54532-supp-v1.zip]

PDB RMSD dendrogram

GT-A phylogenetic tree

HMM distance tree

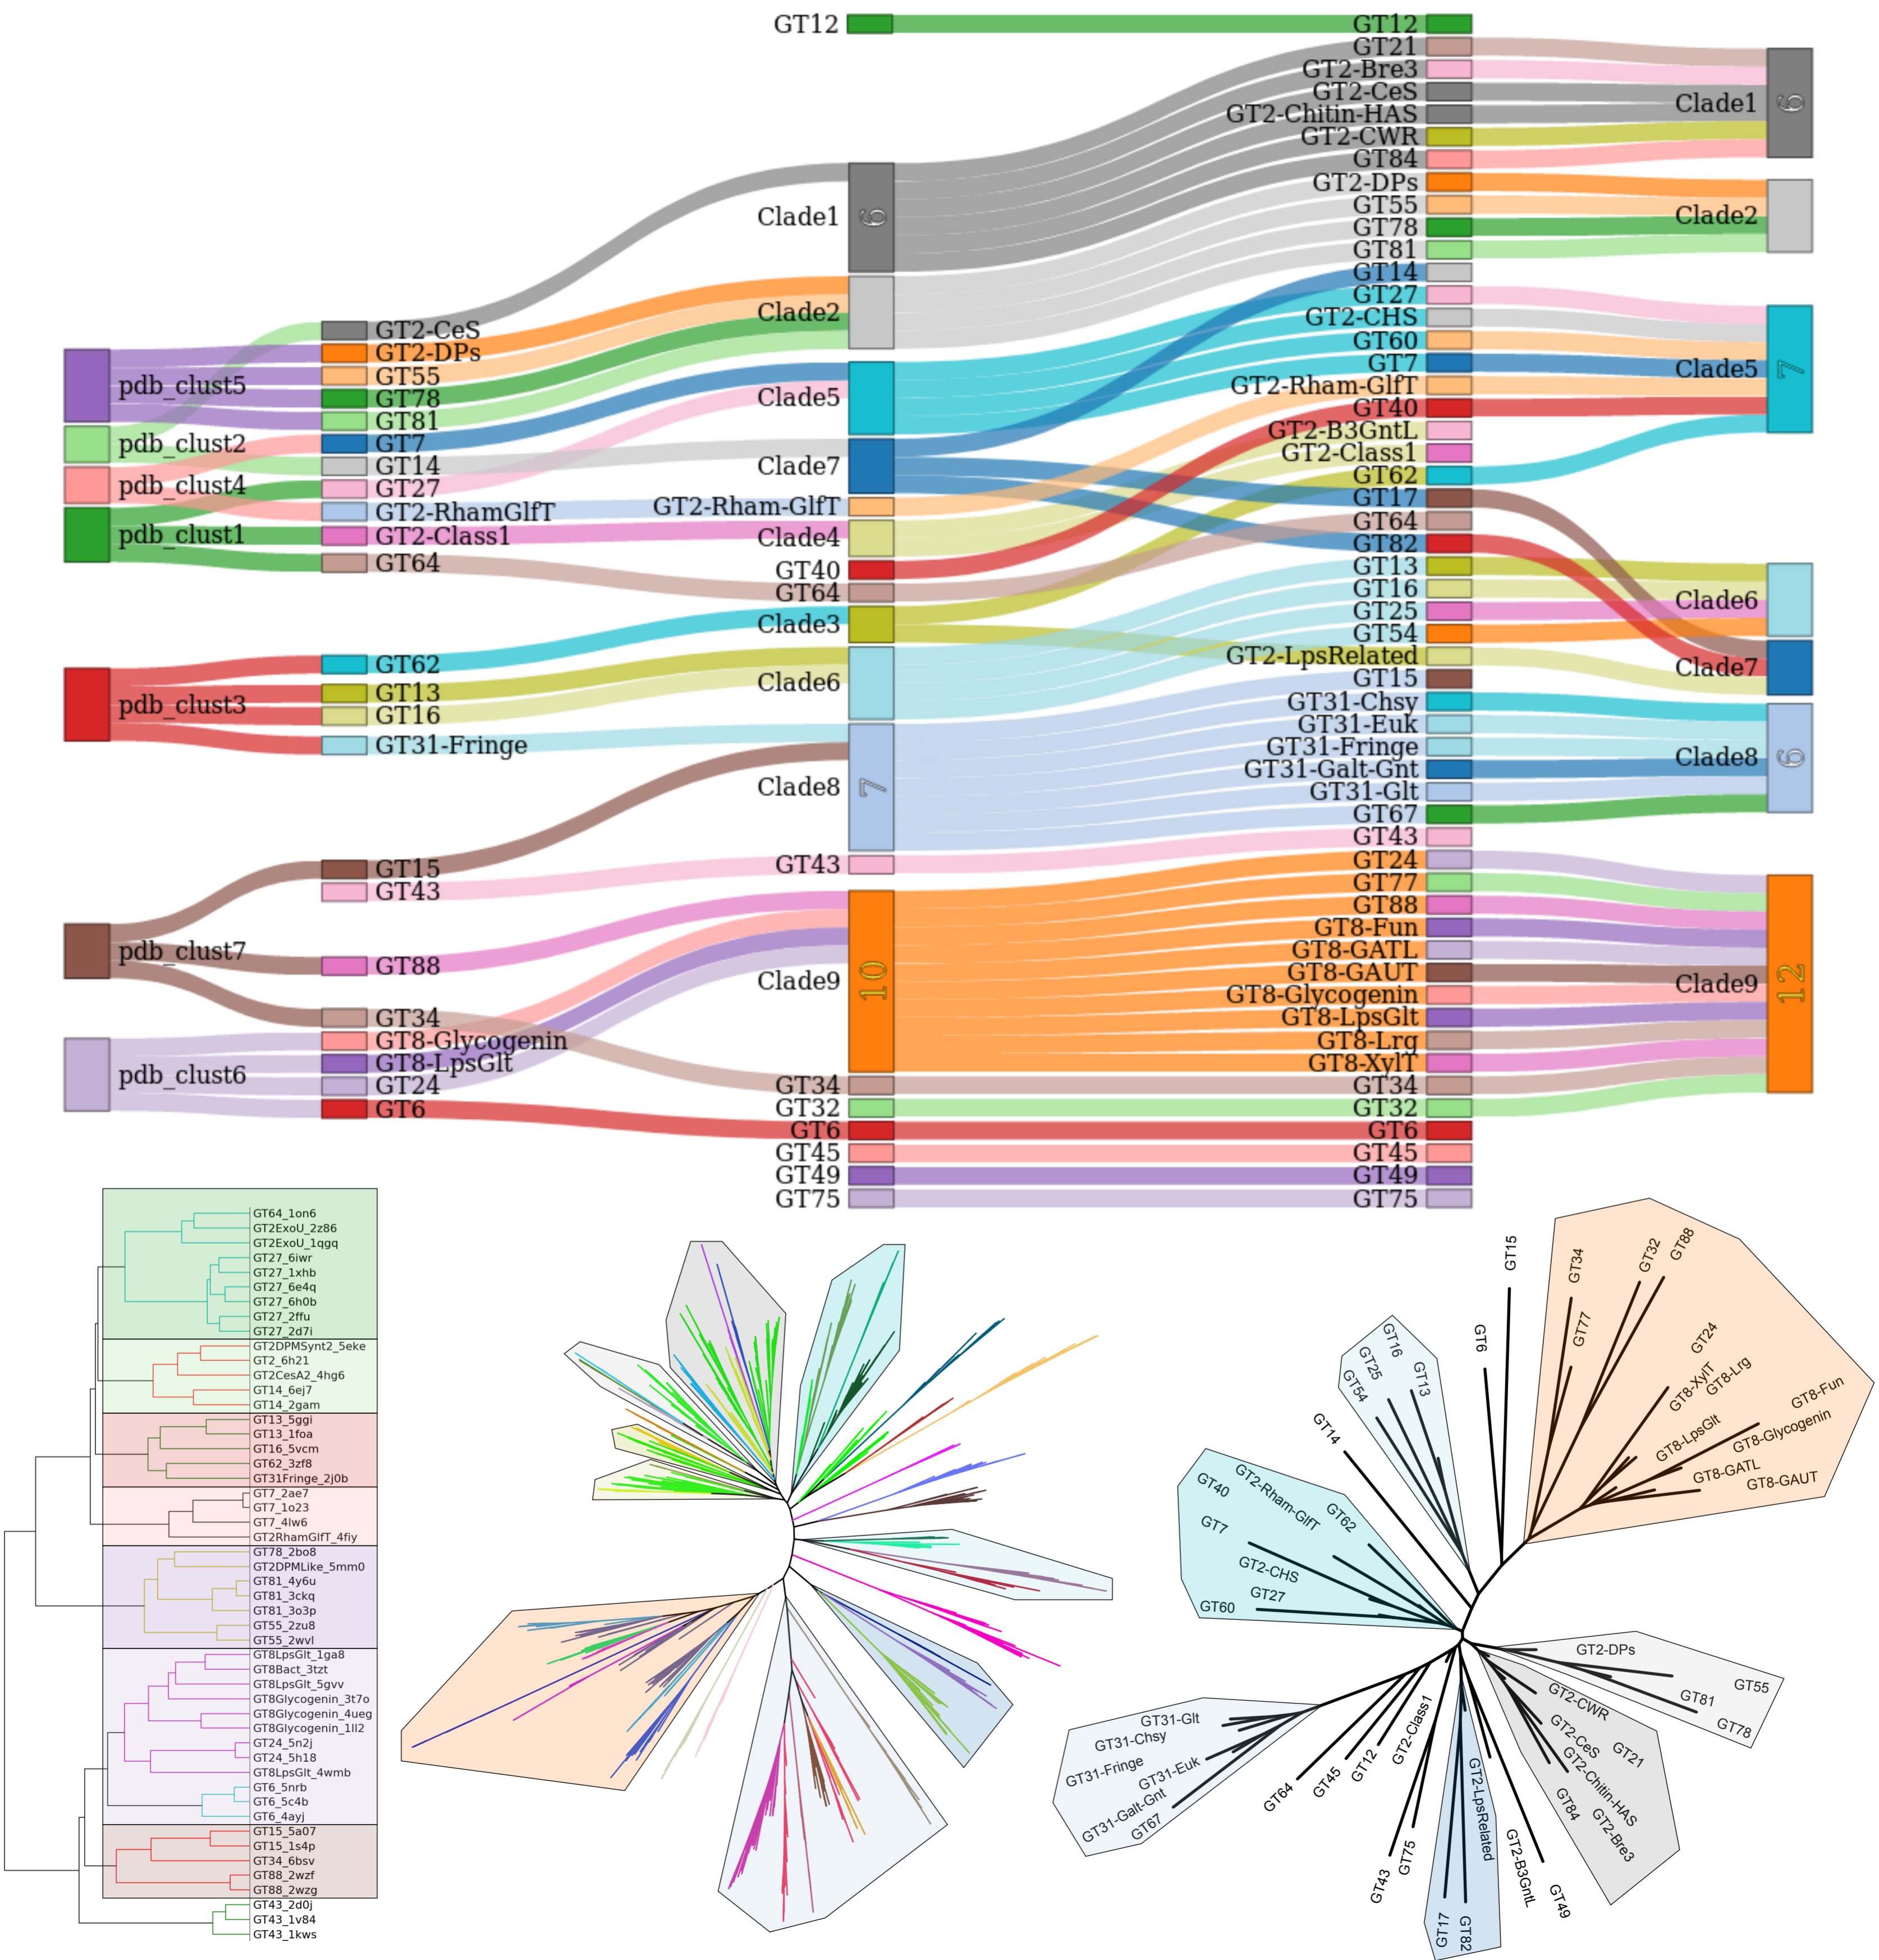

Supplement: supp [file elife-54532-supp-v1.zip]
